# Supplementary material for: Changes of Protein Expression after CRISPR/Cas9 Knockout of miRNA-142 in Cell Lines Derived from Diffuse Large B-Cell Lymphoma
Source: Cancers (Basel). 2022 Oct 14;14(20):5031. doi: 10.3390/cancers14205031 (PMC9600116; doi:10.3390/cancers14205031)
Supplement: Supplementary file 1 [file cancers-14-05031-s001.zip]

Archive with 5 entries (5 files):
- Supplementary Figures S1-S4.pdf
- Supplementary Table S1.xlsx
- Supplementary Table S2.xlsx
- Supplementary Table S3.xlsx
- Supplementary Table S4.xlsx
