# Supplementary material for: Changes of Protein Expression after CRISPR/Cas9 Knockout of miRNA-142 in Cell Lines Derived from Diffuse Large B-Cell Lymphoma
Source: Cancers (Basel). 2022 Oct 14;14(20):5031. doi: 10.3390/cancers14205031 (PMC9600116; doi:10.3390/cancers14205031)
Supplement: Supplementary file 1 [file cancers-14-05031-s001.zip › Supplementary Table S1.xlsx]

## Sheet: cloning primer
	target gene	NCBI RefSeq	cloning primers	primer sequence (restriction sites are underlined)	cloned sequence (miRNA-142-5p binding sites are underlined)	genomic location (BLAT, hg38)	miRNA binding site
	CCNB1	NM_031966.4	5'-CCNB1-SpeI	GGACTAGTCTTGTAAACTTGAGTTGGAG	CTTGTAAACTTGAGTTGGAGTACTATATTTACAAATAAAATTGGCACCATGTGCCATCTGTACATATTACTGTTGCATTTACTTTTAATAAAGCTTGTGGCCCCTTTTACTTTTTTATAGCTTAACTAATTTGAATGTGGTTACTTCCTACTGTAGGGTAGCGGAAAAGTTGTCTTAAAAGGTATGGTGGGGATATTTTTAAAAACTCCTTTTGGTTTACCTGGGGATCCAATTGATGTATATGTTTATATACTGGGTTCTTGTTTTATATACCTGGCTTTTACTTTATTAATATGAGTTACTGAAGGTGATGGAGGTATTTGAAAATTTTACTTCCATAGGACATACTGCATGTAAGCCAAGTCATGGAGAATCTGCTGCATAGCTCTATTTTAAAGT…	chr12, -, nt 26337432-26338106	hsa-miR-142-5p
			3'-CCNB1-SacI	CGAGCTCGTGAAAGTTTGAAGATACTAGC
	LIMA1	NM_001113546.2	5'-LIMA1-SpeI	GGACTAGTGTGCTGTAAGGCTTGTAACTGG	GTGCTGTAAGGCTTGTAACTGGGGAAATATTCCACCTGATAATAGCCCAGATTCTACTGTATTCCCAAAAGGCAATATTAAGGTAGACAGATGATTAGTAGTATATTGTTACACACTATTTTGGAATTAGAGAACATACAGAAGGAATTTAGGGGCTTAAACATTACGACTGAATGCACTTTAGTATAAAGGGCACAGTTTGTATATTTTTAAATGAATACCAATTTAATTTTTTAGTATTTACCTGTTAAGAGATTATTTAGTCTTTAAATTTTTTAGGTTAATTTTCTTGCTGTGATATATATGAGGAATTTACTACTTTATGTCCTGCTCTCTAAACTACATCCTGAACTCGACGTCCTGAGGTATAATACAACAGAGCACTTTTTGAGGCAATTG…	chr12, -, nt 50176216-50176823	hsa-miR-142-5p
			3'-LIMA1-SacI	CGAGCTCCTCTTCACTTTGCTCTAACACG
	TFRC	NM_003234.4	5'-TFRC-SpeI	GGACTAGTGATTCATCCTGGTCTGAGAC	CCTACCACAGTGTCTGTATCGGAGACAGTGATCTCCATATGTTACACTAAGGGTGTAAGTAATTATCGGGAACAGTGTTTCCCATAATTTTCTTCATGCAATGACATCTTCAAAGCTTGAAGATCGTTAGTATCTAACATGTATCCCAACTCCTATAATTCCCTATCTTTTAGTTTTAGTTGCAGAAACATTTTGTGGTCATTAAGCATTGGGTGGGTAAATTCAACCACTGTAAAATGAAATTACTACAAAATTTGAAATTTAGCTTGGGTTTTTGTTACCTTTATGGTTTCTCCAGGTCCTCTACTTAATGAGATAGTAGCATACATTTATAATGTTTGCTATTGACAAGTCATTTTAACTTTATCACATTATTTGCATGTTACCTCCTATAAACTT…	chr3, -, nt 196049878-196050551	hsa-miR-142-5p
			3'-TFRC-SacI	CGAGCTCGGTCCTGACGATCTTGTTTATTG
	AKT1S1	NM_031966.4	5'-AKT1S1-SpeI	GGACTAGTGATGAGGAGAATGGGCCGCC	GATGAGGAGAATGGGCCGCCCTCTTCGCCCGACCTGGACCGCATCGCGGCGAGCATGCGCGCGCTGGTGCTGCGAGAGGCCGAGGACACCCAGGTCTTCGGGGACCTGCCACGGCCGCGGCTTAACACCAGCGACTTCCAGAAGCTGAAGCGGAAATATTGAAGTCCAGGGAGGGAGCGCCCCGGGCCGCGTCCGCCCCGTCCCACACTACGCCCCCGCCCCACTCCCGGGGCCTGCTAATCTGAGGCCGATCCGGGACCGGCCTCCTTGCGTCTCCCATTCCCAAGATTGTCCCGCCTCTGCCAATCCCCGCCGTCCTTCCAGCCCACGACCTGCCGCGCCGAGGAGCGGCATCTGTCCCGTTTCCCGATTGGGTCTGTCGTCTCTCTCCGCCTAGCG…	chr19, -, nt 49869097-49870061	hsa-miR-142-3p
			3'-AKT1S1-SacI	CGAGCTCCAACCCCTCACTCTCTCCCC
