# Supplementary material for: Changes of Protein Expression after CRISPR/Cas9 Knockout of miRNA-142 in Cell Lines Derived from Diffuse Large B-Cell Lymphoma
Source: Cancers (Basel). 2022 Oct 14;14(20):5031. doi: 10.3390/cancers14205031 (PMC9600116; doi:10.3390/cancers14205031)
Supplement: Supplementary file 1 [file cancers-14-05031-s001.zip › Supplementary Table S2.xlsx]

## Sheet: All identified
Uniprot Accession	Gene names	Protein names	Peptides	Intensity	MS/MS count	LFQ intensity BJAB_KO1	LFQ intensity BJAB_KO3	LFQ intensity BJAB_KO4	LFQ intensity BJAB_KO5	LFQ intensity BJAB_KO6	LFQ intensity BJAB_wt1	LFQ intensity BJAB_wt2	LFQ intensity BJAB_wt3	LFQ intensity BJAB_wt4	LFQ intensity BJAB_wt6	LFQ intensity SUDHL4_KO2	LFQ intensity SUDHL4_KO3	LFQ intensity SUDHL4_KO4	LFQ intensity SUDHL4_KO5	LFQ intensity SUDHL4_KO6	LFQ intensity SUDHL4_wt1	LFQ intensity SUDHL4_wt2	LFQ intensity SUDHL4_wt3	LFQ intensity SUDHL4_wt4	LFQ intensity SUDHL4_wt5
P63261	ACTG1	Actin, cytoplasmic 2	29	2085000000000	5972	79641000000	77915000000	82903000000	81602000000	77832000000	75102000000	87071000000	79706000000	80069000000	89922000000	138740000000	134120000000	126370000000	129950000000	145690000000	136070000000	138070000000	153670000000	146750000000	130500000000
B2R4R0	HIST1H4H	Histone H4	10	911620000000	1689	35069000000	37032000000	48908000000	47099000000	44172000000	42958000000	45187000000	48925000000	54677000000	33161000000	26300000000	52377000000	60246000000	54907000000	55385000000	54526000000	60164000000	85044000000	67167000000	81883000000
V9HVZ4	HEL-S-162eP	Glyceraldehyde-3-phosphate dehydrogenase	26	849050000000	3536	30720000000	30752000000	33799000000	30507000000	32031000000	45078000000	42179000000	39086000000	34080000000	43445000000	63305000000	59189000000	55797000000	57133000000	63758000000	50011000000	54190000000	58439000000	58187000000	45137000000
A3KPC7	HIST1H2AH	Histone H2A	6	696310000000	992	30788000000	34136000000	35714000000	35949000000	31963000000	45530000000	42089000000	41575000000	35385000000	44261000000	38170000000	38187000000	40519000000	34875000000	35194000000	44254000000	46152000000	43459000000	50013000000	40440000000
Q0D2M2	HIST1H2BC	Histone H2B	5	591370000000	1075	22573000000	19373000000	24269000000	25137000000	20676000000	27349000000	29002000000	24080000000	22655000000	22961000000	38419000000	35168000000	39634000000	39295000000	33775000000	45041000000	50174000000	46076000000	52138000000	44024000000
V9HWJ7	HEL-S-37	Plastin-2	45	531610000000	2524	26866000000	26071000000	26627000000	26843000000	27795000000	31106000000	32902000000	31732000000	27473000000	33311000000	30113000000	29386000000	27560000000	28440000000	30157000000	28163000000	30379000000	25186000000	29024000000	26151000000
K9JA46	EL52	Heat shock protein HSP 90-alpha	55	468250000000	3141	27095000000	28161000000	27465000000	25274000000	27919000000	25451000000	24832000000	24495000000	23650000000	25331000000	26350000000	24748000000	22890000000	24291000000	23900000000	27346000000	26640000000	25179000000	24434000000	27018000000
A0A024R4F1	ENO1	Alpha-enolase	27	448920000000	2180	26770000000	22167000000	26544000000	25362000000	26529000000	34839000000	37655000000	34149000000	27582000000	38591000000	20161000000	17700000000	17901000000	17631000000	20487000000	14861000000	15574000000	19867000000	19542000000	12667000000
P68363	TUBA1B	Tubulin alpha-1B chain	28	432960000000	2324	21438000000	21196000000	21469000000	19541000000	20299000000	21791000000	23092000000	20937000000	22929000000	22837000000	27880000000	25001000000	25189000000	24915000000	27182000000	29021000000	29689000000	19598000000	26774000000	27353000000
V9HWB8	HEL-S-30	Pyruvate kinase	43	418450000000	2887	19672000000	17515000000	20150000000	19545000000	18351000000	21866000000	23456000000	22077000000	20704000000	22839000000	26112000000	22084000000	26090000000	23592000000	28946000000	22103000000	22999000000	27389000000	27624000000	18824000000
Q53GE9		Elongation factor 1-alpha	25	408020000000	2315	18834000000	17789000000	18366000000	17086000000	16835000000	17913000000	21231000000	18006000000	22957000000	18350000000	24554000000	22117000000	24201000000	21808000000	29066000000	26059000000	26286000000	28342000000	26950000000	24517000000
V9HWB9	HEL-S-133P	L-lactate dehydrogenase	25	374390000000	1495	9744200000	8400700000	11302000000	8756900000	8266500000	22393000000	23774000000	18061000000	19215000000	25530000000	32868000000	25933000000	23296000000	23745000000	24950000000	18187000000	18616000000	22284000000	24365000000	16498000000
V9HWF5	HEL-S-69p	Peptidyl-prolyl cis-trans isomerase	13	334000000000	1240	15067000000	13579000000	14383000000	13947000000	14231000000	13394000000	15956000000	14879000000	14396000000	15904000000	24963000000	22448000000	20859000000	20792000000	20110000000	22265000000	23040000000	22425000000	27054000000	20274000000
Q8IZ29	TUBB2C	Tubulin beta-4B chain	26	331930000000	2891	14940000000	14495000000	14679000000	14553000000	15184000000	15449000000	17023000000	14892000000	16674000000	16306000000	20443000000	17783000000	17469000000	16725000000	17558000000	18944000000	18741000000	12372000000	16375000000	17990000000
A0A384N6H1	EEF2	Elongation factor 2	51	325590000000	2347	15574000000	15676000000	14829000000	15456000000	15220000000	14189000000	13352000000	11812000000	12756000000	13263000000	22437000000	22528000000	19722000000	21227000000	21880000000	21151000000	20763000000	20762000000	17607000000	23070000000
V9HWN7	HEL-S-87p	Fructose-bisphosphate aldolase	26	312450000000	1469	14769000000	13103000000	16560000000	16097000000	17145000000	23997000000	22761000000	21044000000	17488000000	22047000000	16968000000	12403000000	15182000000	15669000000	16294000000	11995000000	11378000000	16583000000	15508000000	10189000000
V9HW22	HEL-S-72p	Heat shock cognate 71 kDa protein	34	309330000000	1931	15395000000	14952000000	13547000000	14312000000	14021000000	15002000000	14685000000	12719000000	14350000000	13983000000	21317000000	21859000000	20067000000	20799000000	20164000000	20443000000	20960000000	17215000000	16179000000	22553000000
V9HWK1	HEL-S-49	Triosephosphate isomerase	18	306380000000	1317	12487000000	11013000000	13132000000	11742000000	13004000000	15753000000	15821000000	16941000000	13589000000	16490000000	22128000000	19862000000	20990000000	21074000000	20869000000	13580000000	15004000000	20633000000	20910000000	10764000000
A0A024RD80	HSP90AB1	Heat shock protein HSP 90-beta	51	301720000000	1718	13983000000	14952000000	14178000000	13277000000	13571000000	13337000000	13726000000	11969000000	13652000000	13502000000	22467000000	20863000000	18837000000	18817000000	20572000000	17707000000	18383000000	14839000000	13743000000	17959000000
P68431	HIST1H3A	Histone H3.1	6	262580000000	452	10070000000	14042000000	11129000000	15595000000	12025000000	15534000000	10910000000	22502000000	12441000000	7812900000	5082000000	8944000000	12830000000	12192000000	11946000000	11619000000	12889000000	22390000000	13322000000	16427000000
Q5U077	LDHB	L-lactate dehydrogenase	20	262290000000	1009	13733000000	13336000000	13269000000	13305000000	13685000000	12087000000	11313000000	11805000000	10225000000	11771000000	15213000000	15801000000	15731000000	16354000000	15806000000	14615000000	14340000000	13531000000	14546000000	13285000000
P16401	HIST1H1B	Histone H1.5	8	228280000000	556	11164000000	11407000000	11656000000	11849000000	12789000000	19973000000	16306000000	19760000000	16159000000	17605000000	7178500000	8504700000	9854800000	9669700000	8392300000	12609000000	13076000000	11731000000	11807000000	12162000000
V9HWF4	HEL-S-68p	Phosphoglycerate kinase	32	221710000000	1471	11041000000	9283800000	12089000000	11155000000	12671000000	15852000000	17252000000	18934000000	13849000000	19537000000	10806000000	9352300000	10826000000	11894000000	11477000000	7737900000	8942900000	11698000000	11553000000	7135000000
A0A384NPQ2	PRDX1	Peroxiredoxin-1	18	210320000000	623	9198800000	9102700000	9103900000	9403500000	9146900000	11988000000	11111000000	10968000000	9914800000	11592000000	15879000000	15270000000	13502000000	13936000000	13360000000	12470000000	12567000000	12783000000	13014000000	12407000000
A0A024R3X4	HSPD1	60 kDa heat shock protein, mitochondrial	45	203790000000	1641	7872700000	7968600000	7935300000	7829200000	7666600000	6098700000	5800000000	6564600000	8521400000	5512800000	16641000000	14564000000	16717000000	15262000000	17092000000	14423000000	12710000000	17117000000	14909000000	13160000000
P22626	HNRNPA2B1	Heterogeneous nuclear ribonucleoproteins A2/B1	21	197740000000	1161	8818900000	9113500000	9159600000	8996800000	9058500000	10744000000	11230000000	11483000000	10124000000	11617000000	11258000000	10375000000	12152000000	10942000000	10505000000	11223000000	11462000000	9388600000	10638000000	10587000000
V9HWI5	HEL-S-15	Cofilin-1	17	179780000000	1258	8112400000	8700700000	7802600000	8679700000	8691500000	8793700000	8541300000	9270000000	7716700000	9117100000	8479300000	9342200000	10062000000	10020000000	9735000000	11658000000	12680000000	9976100000	10271000000	8937000000
V9HW31	HEL-S-271	ATP synthase subunit beta	28	166490000000	1435	8091500000	7514100000	8158100000	7798800000	7751500000	6698800000	6610100000	7344100000	7999100000	6313600000	10934000000	10228000000	11867000000	10717000000	11589000000	10242000000	9867000000	13391000000	12725000000	8995400000
P16403	HIST1H1C	Histone H1.2	10	164170000000	363	6487100000	6307300000	6295400000	6945100000	6714300000	11446000000	8673400000	10749000000	8344400000	9480900000	6683600000	8375400000	8540800000	8563000000	7304500000	11940000000	14117000000	10244000000	11986000000	10814000000
P68032	ACTC1	Actin, alpha cardiac muscle 1	22	153900000000	414	6404000000	5990700000	6207300000	7115400000	7387700000	3807400000	5130600000	5340900000	4621100000	4662000000	12325000000	10783000000	10863000000	10479000000	10592000000	10872000000	12636000000	12067000000	11857000000	10789000000
V9HW26	HEL-S-123m	ATP synthase subunit alpha	29	152490000000	1104	7346300000	7385300000	7145100000	7280900000	7228400000	6270400000	5771000000	7151900000	7806900000	5917900000	10113000000	9845200000	10342000000	9770300000	10448000000	9407700000	8434200000	11549000000	11602000000	8936700000
P07737	PFN1	Profilin-1	12	148310000000	881	4617700000	4372400000	5079400000	4374900000	5151800000	4607100000	5381700000	5006700000	4687500000	4742900000	10904000000	9917800000	9687700000	8707000000	10548000000	12843000000	12983000000	15357000000	14460000000	10677000000
V9HWE9	HEL-S-22	Glutathione S-transferase P	15	147400000000	884	7156700000	6986900000	7082100000	7059400000	6822600000	5949900000	7937300000	7024600000	7396800000	7765700000	9700400000	7745700000	8818900000	8536100000	10096000000	10656000000	10372000000	9167700000	9793700000	8499000000
Q32Q12	NME1-NME2	Nucleoside diphosphate kinase	15	147200000000	682	8555100000	8436600000	8459700000	8306100000	8448300000	6871000000	6904700000	6459500000	6242400000	7159200000	9515200000	9465000000	9001500000	9524000000	9356700000	7274600000	7979000000	6497600000	7164300000	7711200000
V9HW98	HEL2	14-3-3 protein epsilon	25	144640000000	986	6343700000	6559600000	6504100000	6664000000	6675400000	6588400000	6861200000	7094300000	5831400000	7314600000	9970000000	8578000000	9516800000	10796000000	10257000000	9277300000	9063700000	8591400000	9847700000	8491800000
A0A024R1N1	MYH9	Myosin-9	127	140220000000	3093	5870500000	6118700000	5801800000	5974000000	6236100000	5653000000	5835200000	6047200000	5584200000	5903000000	10690000000	9791100000	9681700000	9939300000	9633400000	9423800000	9456300000	9815200000	10461000000	9243600000
A0A024R228	HNRPK	Heterogeneous nuclear ribonucleoprotein K	28	139330000000	1185	7310900000	8024000000	7379000000	7729300000	7567800000	9041400000	8266100000	7680600000	7688600000	8908500000	6853300000	6065600000	6359500000	6219200000	6468000000	6541300000	6103900000	5747000000	6420700000	6347200000
P78527	PRKDC	DNA-dependent protein kinase catalytic subunit	204	137070000000	3767	7366900000	7553600000	7805400000	7710800000	7937700000	7016200000	7233000000	7133700000	6887600000	7171100000	7390800000	7692700000	7859600000	7503900000	7588300000	8843900000	8683600000	7358900000	7906100000	8832000000
A2VCK8	TMSB4X	Thymosin beta-4	7	136090000000	463	7630600000	8096100000	7208600000	8486100000	8251900000	10071000000	8642500000	10239000000	9089700000	9327100000	10766000000	8028000000	2932600000	5048400000	2865600000	5126500000	5671600000	6593000000	6874400000	6153600000
A0A0S2Z4G7	NPM1	Nucleophosmin	12	133650000000	909	7057100000	6821200000	7302400000	7160700000	5998700000	5540100000	8234500000	6466500000	8108000000	6120900000	7871400000	5736300000	7330600000	6543800000	7796400000	6918300000	6685300000	6646800000	6714700000	6406900000
F8W6I7	HNRNPA1	Heterogeneous nuclear ribonucleoprotein A1	18	131090000000	785	6106700000	6607300000	5826600000	6397900000	5623300000	7329000000	6727300000	6648100000	6790100000	6761200000	7412700000	6396700000	7794800000	6804000000	7087300000	8667000000	8096400000	8096200000	8069400000	8325100000
Q0QF37	MDH2	Malate dehydrogenase	15	130890000000	907	5977500000	5687900000	6191900000	6010800000	6214200000	5009600000	5428000000	6738100000	6827400000	5207100000	8920900000	9210200000	9193400000	8854500000	8868100000	6927800000	6871100000	8958000000	9190800000	6493600000
A0A024RDR0	HMGB1	High mobility group protein B1	18	130620000000	1133	5310600000	5095900000	4916500000	4970500000	5263500000	4621300000	5269500000	5610100000	4297100000	5505200000	8452500000	8796400000	9731500000	9083700000	8858900000	9715000000	11207000000	6689700000	8512900000	8393900000
B3KM80	NCL	Nucleolin	24	129320000000	1224	5049600000	4985700000	5268200000	5111700000	4850400000	4544800000	5116100000	4376200000	4900200000	4735600000	9885800000	9066500000	10254000000	9723900000	9886700000	9726800000	10154000000	8394600000	8444000000	9923200000
A0A024R3T8	PARP1	Poly [ADP-ribose] polymerase 1	60	124910000000	1753	5322300000	5013800000	5100500000	5172700000	5543700000	5551900000	5569100000	6538200000	5288400000	6036100000	8160500000	7661300000	8304800000	7815300000	7557600000	8764900000	9133200000	8824500000	10002000000	7928200000
G3V4W0	HNRNPC	Heterogeneous nuclear ribonucleoproteins C1/C2	15	119830000000	762	6144100000	6027300000	6277800000	6139200000	6354100000	6792900000	6626400000	6711900000	6638000000	7289700000	6313200000	6059700000	6406800000	6711900000	5812100000	6391900000	6865900000	6427000000	6709100000	7017500000
D0PNI1	YWHAZ	14-3-3 protein zeta/delta	17	111750000000	654	5897100000	5955900000	5418800000	5757700000	5380200000	6011000000	6658100000	7201600000	6106900000	6219600000	5150800000	5161900000	5039500000	5406400000	5216600000	5180400000	5555100000	5735200000	6825100000	4904400000
A0A087WVQ6	CLTC	Clathrin heavy chain	86	111450000000	2286	5107700000	5282500000	5294700000	5285000000	5412600000	5406100000	5862700000	5877900000	5768100000	5695200000	7442100000	7225800000	7607600000	7758100000	7883600000	6004100000	5879900000	6923700000	6647200000	5568400000
P50990	CCT8	T-complex protein 1 subunit theta	35	107610000000	1033	6486700000	6766900000	6219500000	6816500000	6384100000	6768100000	6372200000	6265100000	6371300000	6725600000	5854800000	5726900000	5276900000	5485300000	5381100000	5172300000	5186000000	4635700000	4603200000	5243400000
A0A024RAS5	ARHGDIB	Rho GDP-dissociation inhibitor 2	13	103830000000	717	3657300000	3639700000	4094600000	3677400000	4160700000	4797200000	5656000000	5735500000	4268800000	6181700000	8289100000	7052900000	6111600000	6198600000	6214500000	6677300000	7096600000	7590400000	8180900000	6354200000
B7Z4V2	HEL-S-124m	Stress-70 protein, mitochondrial	32	102890000000	1151	7612600000	7891400000	8150800000	7746300000	7709700000	5801300000	5836200000	6029900000	7190900000	5223500000	3881900000	3893200000	4567500000	4440000000	4188000000	4108400000	4117800000	4077300000	3512500000	3988000000
P17987	TCP1	T-complex protein 1 subunit alpha	32	100780000000	940	3759000000	3965200000	3503300000	3720300000	3766800000	6849300000	7167300000	6697700000	6654000000	6621200000	6522900000	5987600000	5853800000	5510900000	5985500000	5669100000	5511300000	5477600000	5444000000	5669300000
A0A384NKW7	CSE1L	Exportin-2	42	100190000000	762	5675700000	6299500000	6038000000	6135200000	6227600000	5079100000	5734800000	5339800000	5462300000	5651200000	5005800000	4918800000	5277500000	5090600000	5221600000	4584500000	4604500000	3327500000	3478700000	4646200000
CON__P00761			7	98996000000	374	4975400000	5769000000	5261400000	5486500000	5307100000	5320300000	5928500000	4670600000	5190400000	4804500000	5726400000	4789400000	5564700000	6952000000	6579600000	5372100000	5379100000	5633400000	5785900000	5276900000
B5MDF5	RAN	GTP-binding nuclear protein Ran	11	98715000000	381	5524100000	5708900000	5550300000	5921700000	5751500000	6240700000	5494500000	6115900000	5721200000	6524400000	4785700000	5471000000	4949800000	5191000000	4739000000	5710200000	5442400000	5102400000	5235500000	5014200000
A0A024R1A3	UBE1	Ubiquitin-like modifier-activating enzyme 1	41	98518000000	1353	6008700000	6165900000	6203700000	5925400000	6269300000	6106700000	6469900000	6640700000	6110300000	6660500000	4435800000	4287500000	4415200000	4122700000	4363500000	4438400000	4723400000	5013300000	5065200000	3948400000
A0A0A0MTS2	GPI	Glucose-6-phosphate isomerase	22	95764000000	824	6372500000	5516800000	6425500000	6125100000	6563100000	6914200000	6256200000	6319800000	5633400000	6913300000	5458500000	5012900000	5114700000	4893700000	5287400000	3015900000	3195600000	3292700000	3516200000	2894200000
Q6FHU2	PGAM1	Phosphoglycerate mutase	20	95454000000	977	4001800000	3923100000	4317500000	3924200000	4546300000	5256500000	5721800000	5960000000	5049000000	5879900000	5464000000	4692400000	4965500000	5069500000	4950900000	4327200000	4607500000	4850600000	5729700000	3449800000
P23396	RPS3	40S ribosomal protein S3	19	94004000000	653	5191300000	5337100000	5127200000	5288600000	5054200000	5512900000	4818800000	4522100000	4813600000	5177700000	5335500000	5767800000	5229900000	5755500000	5141800000	5126300000	5750400000	5110700000	4784500000	6060500000
E9KL35	GNB2L1	Guanine nucleotide-binding protein subunit beta-2-like 1	20	89136000000	726	4983500000	5117200000	4820000000	4772600000	4728500000	4552400000	4487700000	4295300000	4393200000	4874400000	6097000000	5570700000	5018600000	5365200000	5250200000	5424000000	5244400000	4308900000	4754600000	5647300000
A0A024R611	CORO1A	Coronin	23	89081000000	802	5194000000	5093100000	4396900000	5238900000	5499800000	6230400000	5229800000	5957300000	4648500000	5573200000	3640100000	3826500000	3507500000	3767700000	3502300000	4280000000	4461300000	4174300000	4638200000	4647300000
A0A024RB85	PA2G4	Proliferation-associated protein 2G4	24	86627000000	986	4674700000	4702300000	4407700000	4722700000	4402800000	4029300000	4863300000	4445400000	4466100000	4445100000	5798200000	5439700000	4857600000	5077900000	4732300000	4689800000	4994100000	4197800000	4284500000	4793000000
Q6NXR8	RPS3A	40S ribosomal protein S3a	18	86064000000	633	4601900000	5040900000	4765600000	4726600000	4907700000	4769800000	4259500000	4229500000	4628600000	4850100000	4721100000	5818100000	4630100000	5072900000	4557100000	4734600000	4928900000	4243000000	3901400000	4685600000
V9HWD9	HEL107	Transketolase	25	85526000000	851	4366700000	4108300000	4351400000	4021200000	4179700000	4733700000	5133000000	5045700000	4471900000	5137300000	5135800000	5308200000	5074000000	4580800000	4864000000	4954800000	4731300000	4666200000	5284800000	4323900000
B4DLR3	HNRNPU	Heterogeneous nuclear ribonucleoprotein U	30	85298000000	912	5551800000	5533800000	5376500000	5527900000	5733200000	5715900000	5719100000	5794300000	5970500000	5946700000	3420700000	3231900000	3591500000	3499800000	3470200000	3397800000	3524300000	3599000000	3702000000	3639500000
P60842	EIF4A1	Eukaryotic initiation factor 4A-I	30	82208000000	844	4087300000	4150900000	3867400000	3977500000	3765300000	3717400000	3463000000	2751700000	4006900000	3232600000	7127100000	6270000000	5288800000	5407400000	5433800000	4962600000	4605500000	4458000000	3654200000	5601200000
P49327	FASN	Fatty acid synthase	94	81061000000	2091	5696200000	6214800000	5906800000	5909400000	5986700000	4828300000	4619500000	3950400000	4113700000	4523400000	4597100000	4269000000	4018300000	4033400000	4179100000	3001200000	3310400000	2840200000	2605200000	3375200000
Q5JR94	RPS8	40S ribosomal protein S8	12	75723000000	466	4096000000	4187900000	4355400000	4159900000	4446900000	3782500000	3982800000	3912500000	4055600000	3956400000	4699100000	4797300000	4190800000	4219500000	4190100000	4575100000	4518300000	3854300000	3901000000	4493800000
V9HWB4	HEL-S-89n	78 kDa glucose-regulated protein	33	74951000000	1001	5015500000	4875400000	5008600000	4582900000	5076200000	4011000000	3885200000	3954500000	4461100000	3705500000	3869400000	4123800000	4105800000	4092200000	4338300000	3342600000	3223200000	4038500000	3617600000	3729400000
H0YA96	HNRNPD	Heterogeneous nuclear ribonucleoprotein D0	15	74168000000	432	2803200000	2502000000	2895400000	2736700000	2658300000	2633400000	3334100000	3086600000	2718800000	2957900000	3790300000	3622400000	4397400000	3627800000	3807100000	4386700000	4437700000	3768600000	4056500000	3887900000
P62424	RPL7A	60S ribosomal protein L7a	20	72021000000	654	3913500000	3999000000	3958400000	3954100000	3846600000	4082200000	4243500000	3999000000	3880400000	4395900000	3712400000	4409300000	4059800000	4248800000	4063700000	3990500000	3998500000	3527300000	3777600000	4176200000
V9HW37	HEL-S-69	T-complex protein 1 subunit epsilon	41	71865000000	1244	3832400000	4026200000	3651300000	3573600000	3916300000	3998400000	4240600000	3987300000	3739800000	4129000000	3859400000	3646400000	3433100000	3509700000	3513400000	3460700000	3518300000	3157600000	3311000000	3318100000
Q6I9V5	SLC25A6	ADP/ATP translocase 3	16	70740000000	388	4022300000	3695300000	4334400000	4095800000	4049500000	3893300000	3478500000	3812600000	3865300000	2846400000	3002600000	3517400000	4511000000	4160700000	4268200000	3766300000	3294700000	5028000000	3702800000	4902700000
V9HVY3	HEL-S-269	Protein disulfide-isomerase	35	70253000000	1028	3584400000	3480200000	3491000000	3463700000	3789100000	4102900000	3634700000	3884800000	3770200000	3836400000	3631600000	3739200000	3885700000	3783200000	3647200000	3899600000	3663700000	4932400000	4543800000	3936600000
V9HW80	HEL-S-70	Transitional endoplasmic reticulum ATPase	47	69917000000	1233	3720500000	3642200000	3642100000	3576100000	3675000000	4225500000	4613700000	4089200000	4099400000	4742000000	3598300000	3317100000	3636300000	3592500000	3699600000	3489900000	3768000000	4035300000	4147600000	3250400000
P16885	PLCG2	1-phosphatidylinositol 4,5-bisphosphate phosphodiesterase gamma-2	65	68537000000	1478	4176100000	3962400000	4223400000	4102300000	4276500000	5031300000	5146600000	5583100000	4521300000	5619100000	2655800000	2575400000	2694900000	2979800000	2919400000	2456600000	2686200000	3153000000	3497400000	2144800000
Q14204	DYNC1H1	Cytoplasmic dynein 1 heavy chain 1	189	68151000000	2891	4372700000	4354800000	4439700000	4457100000	4626600000	3989600000	4047500000	4210100000	3971100000	4121300000	3582500000	3537900000	3534600000	3663900000	3714500000	2861400000	2862700000	3018300000	3046300000	2892900000
Q08211	DHX9	ATP-dependent RNA helicase A	54	67906000000	1350	3629800000	3781700000	3649700000	3794400000	3823700000	3765400000	3664500000	3786300000	3671000000	3726000000	3851000000	3712200000	3915200000	3686300000	3736700000	3752700000	3702400000	3880100000	3651100000	3745100000
Q562R1	ACTBL2	Beta-actin-like protein 2	8	67217000000	10	0	0	0	0	0	0	0	0	0	0	0	0	0	0	0	0	0	14817000	0	0
Q53G71	HEL-S-99n	Calreticulin	18	66902000000	709	2834300000	2745200000	3298600000	2665200000	2669900000	2351400000	3048500000	2720400000	2993600000	2991600000	4238700000	4279300000	4405800000	4015700000	4390200000	4276700000	3426900000	4803600000	5072000000	3561700000
V9HWC0	HEL70	Moesin	36	66641000000	921	2459900000	2590900000	2299000000	2481200000	2495100000	4051900000	3717900000	4099800000	3428000000	3845900000	3808700000	3872200000	3529800000	3739100000	3740600000	4210400000	4605700000	4269800000	5509900000	4249500000
P52272	HNRNPM	Heterogeneous nuclear ribonucleoprotein M	38	66426000000	1073	3661100000	3465500000	3532500000	3476100000	3576500000	3668800000	3856700000	3784200000	4007600000	3939900000	3615700000	3185500000	3484000000	3340700000	3389400000	3613100000	3725300000	3463200000	3458400000	3433300000
I4AY87	MIF	Macrophage migration inhibitory factor	4	65833000000	221	3255200000	2766300000	3579200000	3027400000	3886500000	4352500000	3842600000	4107000000	3285700000	4543100000	3331600000	3289500000	3300900000	3646600000	3335200000	3478200000	4095900000	4282700000	4760500000	2831600000
A0A248RGE3	RPS27A	Ubiquitin-40S ribosomal protein S27a	10	65765000000	815	3746000000	3805200000	3825700000	3890100000	3735500000	4004200000	4148600000	4169100000	3895100000	4226200000	3210200000	2897400000	3062100000	3222900000	3149800000	3042900000	2656700000	3217500000	3021500000	3613400000
C9J9K3	RPSA	40S ribosomal protein SA	16	64363000000	531	3210400000	3295800000	3312900000	3346500000	3469500000	3128200000	3556800000	3064900000	3465100000	3179600000	4260100000	4037300000	3682300000	3773300000	4107300000	4334500000	4041600000	3212900000	3312000000	3858000000
A0A1X7SBZ2	DDX17	Probable ATP-dependent RNA helicase DDX17	35	63293000000	849	3732200000	3720300000	3851700000	3929100000	3795900000	3512400000	3606100000	4055700000	3335800000	4021600000	2683700000	2848600000	3116400000	2807900000	2593300000	3135800000	3336800000	4223800000	3629600000	3020600000
Q96IR1	RPS4X	40S ribosomal protein S4	20	63147000000	908	3204000000	3597400000	3314800000	3421700000	3307100000	2937200000	3085300000	2962200000	2936500000	3119600000	2998800000	3507300000	2914500000	3377300000	3166200000	3180500000	3340200000	2946200000	2744000000	3239900000
B3KX11	CCT3	T-complex protein 1 subunit gamma	37	62226000000	954	2511300000	2462600000	2508200000	2399700000	2411600000	3862100000	4415600000	4090800000	4171300000	4182000000	4229300000	3910800000	3704000000	3485400000	3657200000	3301700000	3541800000	3530400000	3229700000	3383200000
V9HW96	HEL-S-100n	T-complex protein 1 subunit beta	32	61614000000	981	3322800000	3327800000	3239600000	3245400000	2940800000	3135500000	3581700000	3000700000	3296300000	3273300000	3844800000	3280400000	3705100000	3454900000	4369100000	3663300000	3581000000	3348400000	3177200000	3099400000
A0A024RD93	PAICS	Multifunctional protein ADE2	27	61378000000	782	3686400000	3891100000	3752600000	3796500000	3844600000	3509600000	3629300000	3516000000	3250500000	3465600000	3512700000	3100700000	3039700000	3052200000	3379800000	3285600000	3360800000	2698200000	2915300000	2922000000
A0A024RCA7	RPLP2	60S acidic ribosomal protein P2	10	60752000000	372	3242000000	3061900000	3152600000	3064300000	3083900000	3305100000	3592900000	3095400000	3440100000	3374600000	3876200000	3273400000	3516200000	3588300000	4016800000	3500100000	3613900000	3407500000	3439300000	3506000000
H6VRG0	KRT1	Keratin, type II cytoskeletal 1	35	60473000000	655	7784200000	520450000	2211500000	2341000000	2434000000	1999100000	3679400000	1368600000	1387900000	1932100000	1898100000	4655800000	3111700000	1094000000	1928800000	1606900000	2659000000	19822000000	1239800000	3264400000
A0A024R1N4	XRCC6	X-ray repair cross-complementing protein 6	37	60435000000	1061	2818800000	2686400000	2782500000	2744100000	2835600000	2775400000	2957000000	2979800000	2957200000	3215900000	3534800000	3475800000	3944100000	3597600000	3836600000	4067200000	4157300000	4084500000	3936800000	3998500000
P36578	RPL4	60S ribosomal protein L4	26	59705000000	799	3142000000	3023200000	2935100000	3000200000	2814900000	2981600000	3049400000	2756200000	3196000000	2816700000	3882600000	3406700000	3736400000	3634600000	3708500000	3768800000	3579500000	3635100000	3349500000	3972200000
Q5HYG8	DKFZp686P09201	Serine hydroxymethyltransferase	25	59686000000	599	2095100000	1825600000	2125600000	2040800000	2152900000	2807100000	2385800000	2868700000	2835300000	2446500000	4237600000	4237400000	4490200000	4285300000	4409300000	4303100000	4397800000	5292700000	5151700000	3999500000
Q6IAT1	GDI2	Rab GDP dissociation inhibitor beta	36	59342000000	844	2183800000	2149600000	2172000000	2232900000	2044900000	2479500000	2834200000	2825600000	2571600000	2719300000	4109800000	4128500000	4251300000	4320500000	4323100000	4612500000	4949800000	3983300000	4680800000	4430700000
A0A384NL63	HNRNPA3	Heterogeneous nuclear ribonucleoprotein A3	21	59121000000	478	2487500000	2405000000	2482400000	2481900000	2718600000	2203000000	2593300000	2875200000	2453100000	2654900000	3406200000	3630100000	4323500000	3604400000	3694800000	4898300000	3984400000	3811700000	4324700000	4485800000
E9PCY7	HNRNPH1	Heterogeneous nuclear ribonucleoprotein H	13	59095000000	503	3154700000	2917500000	3225400000	2873900000	3010100000	3001900000	3519000000	3304000000	3868200000	3789500000	2746200000	2476700000	2555900000	2431000000	2473300000	2566400000	2609600000	2827400000	2857300000	2961500000
Q53HV2	CCT7	T-complex protein 1 subunit eta	30	58593000000	756	3225400000	3518300000	3211100000	3320100000	3097200000	3645500000	3647200000	3506100000	3520800000	3622200000	3441500000	3369300000	3130700000	3211600000	3004600000	2844500000	2823000000	2885200000	2890300000	2920900000
A0A024R7C7	ILF3	Interleukin enhancer-binding factor 3	39	58532000000	1029	3074000000	3014700000	2963600000	3222000000	3047000000	3394400000	3303700000	3391600000	2963700000	3621300000	3010900000	3016300000	3035200000	3039200000	2841200000	3322600000	3295500000	2614300000	3208400000	3179400000
Q6NZ55	RPL13	60S ribosomal protein L13	11	58441000000	445	3266900000	3458600000	2759300000	3569200000	3240200000	3559200000	3138800000	3547400000	3229900000	3111900000	2742000000	2992600000	2551600000	2556400000	2466000000	2668100000	2666200000	1861500000	2289800000	2673500000
A0A384ME17	TUFM	Elongation factor Tu, mitochondrial	31	58315000000	935	3375600000	3540200000	3591900000	3485200000	3510100000	2839600000	2839800000	3542900000	3090300000	2661300000	3387300000	3473200000	3543400000	3667600000	3446100000	2517000000	2545400000	2826600000	3028400000	2543700000
B7Z9L0	CCT4	T-complex protein 1 subunit delta	27	58157000000	946	3135700000	3259600000	3142000000	3210700000	3080600000	3176100000	3808000000	3157000000	3414300000	3247000000	3419300000	3251000000	3312900000	3102600000	3413000000	3147700000	3171100000	3023200000	3049600000	2606500000
A0A024R9C1	PABPC1	Polyadenylate-binding protein	36	57039000000	848	4121000000	4228300000	3955700000	3949400000	3932600000	3254900000	3220300000	2944700000	3204000000	3439900000	2788300000	2995700000	2449500000	2655700000	2449800000	2844600000	2905900000	2142100000	1909600000	3006100000
V9HWF2	HEL-S-32	Malate dehydrogenase	13	56950000000	413	3402600000	3361100000	3445400000	3514700000	3652800000	3105600000	3254400000	3551900000	2853800000	3331500000	3443500000	3010400000	3213700000	3538400000	3277400000	2430200000	2540100000	2375000000	2604400000	2413100000
Q53YD7	EEF1G	Elongation factor 1-gamma	22	56740000000	755	3770200000	3970700000	3721400000	3962600000	3957200000	3695200000	3735700000	3441800000	3734700000	3948700000	2618500000	2411600000	2285300000	2483000000	2435400000	2398700000	2360400000	2482500000	2384500000	2421100000
A0A384N6B9	PCBP2	Poly(rC)-binding protein 2	17	56682000000	495	2632400000	2594400000	2589500000	2609600000	2610300000	3072500000	2758800000	2783300000	2813100000	2915200000	3497400000	3750800000	3354100000	3187400000	3306000000	3530800000	3402400000	3221000000	3371100000	3792800000
P0DP25	CALM3		11	56608000000	395	2976700000	2604800000	2931800000	2935700000	2948800000	2804400000	3226000000	2920900000	3010300000	3296400000	3581000000	3609600000	3733300000	3406000000	3566200000	3450200000	3686700000	2573400000	2954600000	3222400000
V9HWD6	HEL-S-1	14-3-3 protein beta/alpha	14	56449000000	361	3171900000	3260400000	3116400000	3178900000	3125000000	3332900000	3394500000	3396000000	2850500000	3396700000	2682900000	2633700000	2803400000	2765500000	2755800000	2859100000	2802000000	2202400000	2807000000	2768500000
P80723	BASP1	Brain acid soluble protein 1	12	56360000000	518	4782500000	6248800000	5331000000	5505200000	5153500000	4930200000	3310500000	4818300000	3357100000	3394600000	1029400000	983530000	1170700000	1298800000	1213200000	734440000	707000000	822920000	1254700000	890490000
Q86VG2	SFPQ	Splicing factor, proline- and glutamine-rich	28	55949000000	669	2953900000	3036600000	2871700000	3046900000	3077600000	3161300000	3093000000	2945700000	2960300000	3230300000	3113900000	2868000000	3197900000	3115500000	3014700000	3124200000	3133900000	3008200000	2910900000	3208100000
E5KNY5	LRPPRC	Leucine-rich PPR motif-containing protein, mitochondrial	86	55447000000	1572	3749200000	3878200000	3876000000	3791000000	3884300000	2765800000	2782500000	2764200000	3251300000	2578800000	2845800000	2868800000	2911000000	2842400000	2838300000	2689300000	2600800000	2192500000	2168600000	2790000000
Q5JP53	TUBB	Tubulin beta chain	24	55301000000	488	2386000000	2119600000	2097900000	1901700000	1273500000	2861400000	2541300000	1635600000	2447000000	2128700000	3993400000	3104000000	3587800000	2885300000	4013500000	4676000000	4438900000	2967500000	3959800000	4135000000
D3DPU2	CAP1	Adenylyl cyclase-associated protein	21	54575000000	605	2461300000	2316900000	2291200000	2255700000	2396100000	2861700000	2713600000	2736400000	2663400000	2923500000	3829900000	3621700000	3407300000	3666300000	3364400000	3243700000	3587400000	3459700000	4104600000	3263200000
Q53HW2	RPLP0	60S acidic ribosomal protein P0	15	53686000000	426	2741100000	2865000000	2653400000	2818700000	2829700000	3065900000	3169500000	2810900000	2969600000	3175300000	3276100000	2996400000	3019200000	3014700000	3258100000	3227000000	3377800000	2910100000	2899300000	3192100000
V9HW72	HEL-S-94n	Stress-induced-phosphoprotein 1	36	53049000000	863	2890700000	2923900000	2829800000	2858200000	2942500000	3416200000	3390400000	3177000000	2822100000	3464000000	2615400000	2556400000	2508700000	2834600000	2598800000	2574900000	2424500000	2584600000	2500300000	2471800000
Q92945	KHSRP	Far upstream element-binding protein 2	34	52679000000	982	2836200000	2805500000	2937200000	2686000000	3008300000	2722800000	2731000000	2599400000	2542500000	3014200000	3134100000	3215000000	2966400000	3137100000	2678700000	3051300000	3008500000	2484200000	2773900000	2972400000
E7DVW5	FABP5	Fatty acid-binding protein, epidermal	14	52619000000	501	2835600000	2785200000	2857700000	2824900000	2783500000	2334800000	2837900000	2462600000	2553400000	2673500000	4177000000	3481200000	3250900000	3230600000	3248900000	3109600000	3182500000	2399900000	2577500000	2930700000
A0A0S2Z377	ANXA6	Annexin	49	52299000000	784	17794000	23413000	0	0	22814000	6225800	46582000	69376000	53779000	39779000	6299200000	5967700000	5519600000	6187400000	6245600000	5281100000	5855600000	6737300000	7508500000	5353300000
A0A024R4M0	RPS9	40S ribosomal protein S9	15	51780000000	307	2570900000	2836100000	2572000000	2849500000	2763100000	2974200000	2513300000	2643700000	2425200000	2815600000	2979900000	3441000000	3449200000	3288000000	3244100000	3114200000	3017300000	2872900000	2895700000	3466800000
A0A024QZ64	ALDOC	Fructose-bisphosphate aldolase	24	51279000000	619	1299900000	779070000	1395700000	1386100000	1615900000	3729800000	3987900000	5891700000	2419300000	4409900000	1316200000	1109300000	1513800000	1647800000	1743000000	1154100000	1482400000	4354600000	3262500000	618940000
A0A384MTL2	TAGLN2	Transgelin-2	15	51265000000	525	1107500000	1199800000	1098200000	1136000000	1093500000	953140000	1012800000	989420000	895620000	908390000	5292400000	4410100000	4898400000	4478700000	4790200000	4955600000	5092700000	4243000000	5195500000	4372200000
P62249	RPS16	40S ribosomal protein S16	12	50988000000	350	2836800000	2819600000	2872400000	2940600000	3041300000	3037700000	2676700000	2868100000	2694300000	2959500000	2711300000	3158700000	2787300000	3029600000	3035800000	2939300000	3002600000	2518600000	2475600000	3134000000
J3KPX7	PHB2	Prohibitin-2	15	50794000000	464	2493600000	2348300000	2633400000	2501000000	2404600000	2927800000	2859500000	3116800000	3972600000	2902300000	2246500000	2690100000	2929500000	2718600000	2956300000	2321100000	2399300000	3386700000	2856000000	2809100000
Q8TBK5	RPL6	60S ribosomal protein L6	18	50784000000	659	2395900000	2439500000	2351000000	2376900000	2275200000	2692700000	2564200000	2608800000	2512700000	2719100000	2779800000	2552900000	2945700000	2817400000	2660500000	2548000000	2591500000	2834800000	2436800000	2765200000
Q6NTA2	HNRNPL	Heterogeneous nuclear ribonucleoprotein L	21	50744000000	744	2549500000	2399800000	2594200000	2487000000	2612000000	2827800000	3201700000	3314100000	3008200000	3317800000	2898600000	2488900000	2682300000	2492700000	2485500000	2877500000	3000100000	2451800000	2782200000	2778100000
P15880	RPS2	40S ribosomal protein S2	11	50017000000	315	2549600000	2940000000	2662700000	2635000000	2858900000	2602600000	2855100000	2656800000	2822000000	2809600000	3113300000	2813900000	2975400000	3068200000	2859300000	3162700000	3174300000	2484700000	2575000000	2881200000
P25398	RPS12	40S ribosomal protein S12	10	49281000000	472	2741600000	2507700000	2689400000	2530500000	2524000000	2238500000	2423300000	2206100000	2229200000	2627500000	2911000000	3006300000	3033300000	2690500000	2723700000	3037600000	2885600000	2597300000	2607500000	3065200000
P20700	LMNB1	Lamin-B1	42	49130000000	982	1976400000	2154100000	2140700000	2075400000	2136200000	3183800000	3016000000	3065200000	2973300000	3037700000	2107100000	2117700000	2518700000	2332800000	2196000000	2978700000	3015100000	3066200000	3389400000	2968200000
P13010	XRCC5	X-ray repair cross-complementing protein 5	37	49054000000	936	2336900000	2445800000	2273300000	2324600000	2575300000	2572600000	2347300000	2555800000	2330900000	2790300000	2907500000	3175700000	3011100000	2918900000	3121100000	3130200000	3083700000	2984000000	3011100000	2897400000
P63241	EIF5A	Eukaryotic translation initiation factor 5A-1	17	48793000000	584	1749700000	1621300000	1679800000	1519800000	1473100000	1179200000	1637800000	1563800000	1595300000	1862600000	5349300000	3981800000	4375600000	3847000000	4551500000	3692400000	3551800000	3356700000	3650100000	3546700000
A0A384MTQ3	AHCY	Adenosylhomocysteinase	26	47930000000	561	2757600000	2959900000	2770700000	2894600000	2887200000	2732500000	2613800000	2701800000	2475100000	2783600000	2967400000	2838300000	2657400000	2872100000	2843500000	1919000000	2085700000	1768800000	1935300000	2238500000
A0A0K0K1H7	ACO2	Aconitate hydratase, mitochondrial	42	47822000000	854	2337400000	2304500000	2326100000	2251400000	2308600000	1702900000	1946500000	2420600000	2317900000	1900000000	3369700000	3112700000	3327100000	3290700000	3287400000	2700500000	2479900000	3305300000	3347300000	2247900000
A0A024R1T9	ACLY	ATP-citrate synthase	45	47546000000	1087	2526000000	2533000000	2472600000	2511700000	2597400000	2688900000	2539600000	2780900000	2466400000	2684000000	3098800000	2959500000	2774700000	2756100000	2867900000	2494600000	2662000000	2504200000	2513800000	2386900000
P39023	RPL3	60S ribosomal protein L3	16	47459000000	584	2363500000	2363000000	2135500000	2401600000	2207000000	2337500000	2485000000	2316000000	2496900000	2475100000	2948100000	2766400000	2602500000	2797500000	2899700000	2571900000	2610600000	2699400000	2607700000	2795300000
Q9Y490	TLN1	Talin-1	108	46316000000	1946	2619900000	2660800000	2655700000	2456100000	2626300000	2608300000	2607600000	2800100000	2392200000	2898800000	2431900000	2186100000	2108900000	2287300000	2448600000	2712800000	2813700000	2672400000	3070500000	2461900000
O60506	SYNCRIP	Heterogeneous nuclear ribonucleoprotein Q	25	46156000000	739	2503100000	2459900000	2612900000	2509100000	2508600000	2426700000	2744700000	2318700000	2455900000	2648300000	2465600000	2469400000	2598400000	2452500000	2503400000	2863000000	2982700000	2612900000	2739300000	2762800000
P67809	YBX1	Nuclease-sensitive element-binding protein 1	17	45965000000	477	2593600000	2725600000	2066600000	2533500000	2333500000	1992100000	1594800000	1710600000	1896500000	1821500000	2567500000	2972200000	2834100000	3408000000	3098500000	3235700000	3112700000	2201700000	2157500000	3999400000
Q02790	FKBP4	Peptidyl-prolyl cis-trans isomerase FKBP4	33	45489000000	768	1720700000	1824000000	1800100000	1876900000	1683000000	1314000000	1309700000	1220300000	1137700000	1176300000	3905400000	4189700000	3682200000	3898000000	3792300000	3450400000	3609400000	3415300000	3050700000	3494900000
P34932	HSPA4	Heat shock 70 kDa protein 4	47	45420000000	1018	2366900000	2425200000	2349200000	2459900000	2396700000	2338200000	2374100000	2287600000	2129800000	2474200000	2890900000	2565400000	2673000000	2781100000	2800300000	2695400000	2689000000	2797500000	2751800000	2542100000
V9HW12	HEL-S-2a	Peroxiredoxin-2	13	45153000000	356	2225400000	2205800000	2144000000	2202500000	2022200000	1974600000	1685400000	1946000000	1616800000	1862200000	2968200000	2928200000	3166800000	3644500000	3318100000	2679500000	3389800000	3166500000	3408500000	2731100000
P62280	RPS11	40S ribosomal protein S11	13	45088000000	275	2532700000	2753200000	2586600000	2429400000	2654900000	2380800000	2427600000	2412600000	2330900000	2598100000	2598000000	2806900000	2416800000	2649400000	2127100000	2698500000	2314300000	2159200000	2173100000	2749400000
O00231	PSMD11	26S proteasome non-ATPase regulatory subunit 11	23	44728000000	421	2605400000	2690600000	2847000000	2868700000	2808600000	2461900000	2571000000	2531900000	2418100000	2792000000	2625100000	2407900000	2175000000	2423700000	2127500000	2185700000	2363000000	2192500000	2090900000	2448200000
Q59ET3	CCT6A	T-complex protein 1 subunit zeta	23	43503000000	517	1781200000	1892100000	1719300000	1796000000	1669800000	3168700000	3159300000	2906900000	2914300000	3086100000	2829400000	2588800000	2539900000	2601800000	2647600000	2459100000	2391800000	2180800000	2321500000	2358300000
A0A0S2Z3G9	ACTN4	Alpha-actinin-4	51	43439000000	1203	2408600000	2261200000	2286400000	2350400000	2445800000	2312500000	2436700000	2322400000	2175700000	2515700000	2679200000	2355900000	2324100000	2412700000	2286900000	2462700000	2609800000	1922600000	2272800000	2485700000
A0A2R8Y6J3	RPL5	60S ribosomal protein L5	13	43101000000	548	2467600000	2447300000	2525900000	2587400000	2559100000	2677900000	2576400000	2530200000	2765200000	2733900000	2256700000	2466400000	2068800000	2354500000	2207100000	2326700000	2209500000	1901700000	1919100000	2251000000
P30050	RPL12	60S ribosomal protein L12	7	42821000000	274	2194800000	2220700000	2296400000	2121900000	2155300000	1883100000	2289700000	2198700000	2071100000	2154300000	2777400000	2898400000	2457200000	2577100000	2717900000	2504100000	2535500000	2442500000	2658700000	2729600000
P62269	RPS18	40S ribosomal protein S18	9	42538000000	307	2228600000	2367400000	2248900000	2308900000	2345500000	2371100000	2146000000	2150600000	2202600000	2360100000	2484200000	2665900000	2412400000	2441300000	2262400000	2168900000	2442700000	2184000000	2091000000	2568500000
P07814	EPRS	Bifunctional glutamate/proline--tRNA ligase	72	41956000000	1325	2351900000	2397600000	2378400000	2364600000	2490800000	2298400000	2280000000	2184500000	2254500000	2357100000	2382700000	2317800000	2253400000	2344300000	2373800000	2100800000	2163700000	1988600000	2013500000	2142200000
A8K525	NONO	Non-POU domain-containing octamer-binding protein	21	41541000000	755	2199700000	2228600000	2456000000	2279800000	2298300000	2274500000	2362000000	2224400000	2431100000	2573300000	1725800000	1591500000	1809800000	1816900000	1684500000	1930100000	1948200000	1642000000	1754400000	1895600000
A8MXP9	MATR3	Matrin-3	30	41090000000	961	2556500000	2484900000	2517500000	2424100000	2412900000	2688500000	2709400000	2946200000	2702900000	2853800000	1809400000	1620400000	1744100000	1712300000	1683100000	1844500000	1857300000	1494600000	1649800000	1702200000
CON__P13645	KRT10	Keratin, type I cytoskeletal 10	34	40906000000	449	5136600000	0	714590000	591930000	647120000	626640000	2216000000	415520000	301400000	892280000	579570000	3262900000	1372500000	481840000	639590000	472320000	1681700000	23519000000	763930000	1755200000
B4DJV2	CS	Citrate synthase	18	40872000000	439	1586600000	1651500000	1620100000	1619700000	1880000000	1578600000	1376700000	1741600000	1851500000	1453300000	2942300000	3230600000	2983900000	3191900000	3126600000	2719400000	2449200000	3082600000	3163400000	2520400000
A0A024RCJ2	HIST1H2BJ	Histone H2B	5	40457000000	128	1972800000	1815100000	1956500000	1844500000	1796500000	2422200000	2682800000	2593400000	2346000000	2975700000	2474500000	2608600000	2163900000	1932500000	1717500000	1897900000	1938900000	2914500000	2772300000	2654000000
A0A140VJW5	DARS	Aspartate--tRNA ligase, cytoplasmic	31	40401000000	683	2613000000	2621200000	2638000000	2737400000	2856500000	2576200000	2487800000	2711000000	2500800000	2611600000	1254900000	1359200000	1282800000	1331900000	1266500000	2128500000	2190500000	2462700000	2308000000	2194400000
P18124	RPL7	60S ribosomal protein L7	17	40026000000	545	1746700000	2010400000	1823100000	1820900000	2068800000	2128700000	2025800000	2093000000	1866100000	2135000000	2043700000	2093100000	1997600000	2028000000	2057100000	1917000000	2228000000	2486500000	2023200000	2456900000
V9HWC9	HEL-S-44	Superoxide dismutase [Cu-Zn]	7	39704000000	472	1961000000	1532500000	1734000000	1194600000	1610800000	1714600000	1755500000	1964400000	1808500000	1900100000	3008300000	1996100000	2443700000	1627700000	2762900000	1687600000	2143500000	2166300000	2956200000	1504100000
G3V203	RPL18	60S ribosomal protein L18	8	39598000000	274	2339800000	2229200000	2217400000	2237300000	2488100000	2497200000	2432200000	2257400000	2361400000	2435400000	2078300000	1945600000	1753100000	1800900000	1717000000	1674100000	1891000000	1517200000	1822100000	2265000000
A0A024RCM3	hCG_2005638	Spliceosome RNA helicase DDX39B	23	39388000000	752	2189400000	2260800000	2295200000	2269800000	2219500000	2057800000	2213700000	2129300000	2175600000	2090300000	1919100000	1923900000	2138900000	2231700000	2073900000	2277700000	2230500000	2260900000	2104500000	2057300000
Q6NUR7	EZR	Ezrin	33	39200000000	580	1285100000	1228000000	1309400000	1193500000	1333200000	3587600000	3588900000	3720800000	3327200000	3940500000	1442400000	1566600000	1458900000	1489300000	1454000000	1715800000	1913200000	1808400000	2368300000	1517000000
Q53SS8	PCBP1	Poly(rC)-binding protein 1	16	39089000000	484	1995200000	1971300000	1993300000	1864600000	1955600000	1831300000	2130600000	1915900000	2110600000	2017000000	2651700000	2138700000	2176900000	2068700000	2166100000	2308800000	2405700000	1840000000	1968700000	2252400000
A0A024RDS1	HSPH1	Heat shock protein 105 kDa	44	39077000000	975	1853000000	2009000000	1937400000	1892300000	1882900000	1410700000	1447500000	1239000000	1422300000	1365400000	3042800000	2968800000	2891500000	2801200000	2846700000	2714300000	2519800000	2426300000	1801900000	2922800000
Q15203	PTMA	Prothymosin alpha	3	38574000000	196	708480000	864370000	1015900000	847390000	766600000	1793600000	985020000	608920000	968400000	1472100000	2330600000	3579000000	3473900000	4825500000	4550900000	1729800000	1382300000	4766700000	3716800000	3762500000
Q96DV6	RPS6	40S ribosomal protein S6	11	38270000000	280	2195900000	2204600000	2167000000	2131800000	2177200000	1905400000	1897600000	1979600000	2133200000	2154700000	2317100000	2393000000	2162700000	2018700000	2131400000	2264100000	2303200000	1971100000	1937200000	2386700000
V9HW38	HEL-S-106	Cytosol aminopeptidase	30	38263000000	678	1533100000	1658200000	1667900000	1574800000	1573500000	1419300000	1384800000	1465800000	1476300000	1439400000	3498300000	3423000000	2901400000	3101200000	3089600000	2192100000	2313600000	2102400000	2325400000	2108300000
E4W6B6	RPL27	60S ribosomal protein L27	9	37896000000	293	1875700000	2215600000	1647500000	1874300000	2024400000	2265500000	2015200000	2049000000	2034200000	2232200000	2478800000	2673000000	2019800000	2406200000	2046700000	2024100000	2089900000	2078700000	2216500000	2507300000
P60866	RPS20	40S ribosomal protein S20	5	37775000000	209	2138900000	2292100000	2131200000	2164100000	2293300000	2288200000	2138200000	2233800000	1870600000	2473500000	2081400000	2325000000	1894300000	2219600000	1938500000	2045000000	2140200000	1790900000	1831300000	2369700000
Q9Y230	RUVBL2	RuvB-like 2	27	37739000000	653	2521800000	2582500000	2438300000	2426000000	2508600000	2262800000	2347900000	2333700000	2357500000	2465900000	2022000000	1820100000	1756700000	1760500000	1793900000	1655500000	1724600000	1379900000	1549000000	1602900000
A0A1L1UHR1	VDAC1	Voltage-dependent anion-selective channel protein 1	15	37735000000	420	2697500000	2128500000	2799400000	2827500000	2423900000	3305800000	2405100000	2885400000	2965500000	1871000000	1055600000	1125700000	1345500000	1285900000	1296900000	1392500000	1280400000	2563600000	1633300000	2016600000
A0A0D9SFB3	DDX3X	ATP-dependent RNA helicase DDX3X	37	37734000000	853	2461500000	2419000000	2196100000	2290600000	2081300000	2000800000	1786100000	1595200000	2187800000	1708200000	2339100000	2307400000	2032300000	2021900000	2136200000	2005300000	1979200000	1461800000	1063200000	2357800000
Q5SRT3	CLIC1	Chloride intracellular channel protein	17	37590000000	522	1715900000	1612500000	1628000000	1693100000	1638400000	1592900000	1884400000	1862500000	1707200000	1843300000	2413900000	2051000000	2362400000	2255600000	2413300000	2660500000	2653100000	2520900000	3134200000	2382400000
V9HWB5	HEL-S-66p	Inorganic pyrophosphatase	25	37415000000	618	1958800000	1940700000	1908100000	2042900000	2140200000	1934100000	1819300000	1838100000	1781800000	1910400000	2017100000	1935900000	2211600000	2039100000	2192600000	2401000000	2528300000	2074500000	2100600000	2614200000
Q5VXV3	SET	Protein SET	11	37100000000	337	1783600000	1929000000	1688800000	1981800000	1681100000	1759300000	1626600000	1669000000	1624900000	1700100000	2907000000	2548900000	2796600000	2438000000	2377800000	2276400000	2230700000	1732600000	2221400000	2334900000
P62906	RPL10A	60S ribosomal protein L10a	11	37027000000	328	1933100000	2021800000	2120600000	2094000000	2098500000	2110700000	2266100000	1898300000	2000200000	2428900000	2388000000	2352900000	1813700000	2113600000	1903000000	1959300000	1837500000	1819400000	1939400000	2228100000
A0A140VK49	SND1	Staphylococcal nuclease domain-containing protein 1	46	37007000000	815	1387900000	1413200000	1356500000	1396300000	1455800000	1658700000	1648900000	1661000000	1646000000	1754800000	2744000000	2723800000	2650300000	2661300000	2952600000	2662800000	2603400000	2548100000	2618900000	2736900000
P61981	YWHAG	14-3-3 protein gamma	14	36994000000	281	1730500000	1906000000	1462900000	2026100000	1812200000	1864600000	1568300000	2131200000	1619400000	1840200000	2657500000	2254700000	2311300000	2237800000	2757800000	2158000000	2165600000	2421700000	2142500000	1886600000
Q6FHP5	PHB	Prohibitin	18	36979000000	424	1911700000	1743800000	1859400000	1875600000	1765500000	2178400000	2154500000	2511200000	2812500000	2133600000	1928300000	1964300000	2127000000	2012200000	1954100000	1832300000	1745600000	2321900000	2111300000	2039800000
Q6FHF5	PCNA	Proliferating cell nuclear antigen	11	36918000000	303	2848900000	2851000000	2751900000	2877500000	2645500000	2116000000	2041600000	1580900000	2085100000	2031700000	1864400000	1854400000	1645000000	1589200000	1494000000	2222400000	2180900000	718130000	841410000	2638800000
A0A0S2Z4G4	TPM3		26	36642000000	557	2165400000	2384000000	2221500000	2172800000	2306300000	2215400000	2066800000	2067600000	1948400000	2103400000	1710400000	1792500000	1507500000	1591200000	1454500000	2190000000	2043900000	1862200000	2049200000	2198300000
A0A384N6C2	IMPDH2	Inosine-5-monophosphate dehydrogenase 2	25	36553000000	734	1832900000	1774800000	1665900000	1672700000	1836000000	1777000000	2182300000	2169500000	2395000000	2277800000	1964900000	1856700000	1732000000	1816500000	1677300000	2258000000	2021900000	2278300000	2235300000	1861400000
A8K8U1	CAND1	Cullin-associated NEDD8-dissociated protein 1	55	36454000000	970	1645000000	1674800000	1671100000	1680000000	1734200000	1821300000	1775800000	1714500000	1542200000	1753000000	2307000000	2425200000	2409700000	2297500000	2407400000	2688400000	2698600000	2218800000	2529200000	2452600000
V9HWC7	HEL-S-128m	Peroxiredoxin-6	17	35858000000	471	1717100000	1576500000	1711300000	1598800000	1692300000	1423800000	1464100000	1475000000	1295300000	1505200000	2774900000	2594100000	2682300000	2614000000	2890100000	2460400000	2523400000	2329000000	2692600000	2148200000
P33241	LSP1	Lymphocyte-specific protein 1	19	35480000000	448	959830000	904420000	1104900000	1070000000	1081400000	805260000	1310600000	1039600000	854550000	1047000000	2907500000	2748000000	3009700000	3153200000	3266700000	3087600000	2676100000	2598000000	3399900000	2450000000
Q53FC7	HSPA6	Heat shock 70 kDa protein 6	7	34907000000	67	0	0	0	0	0	0	0	0	0	0	0	0	0	0	0	0	0	0	0	1977100000
V9HWC2	HEL-S-67p	Protein deglycase DJ-1	12	34899000000	371	3108600000	2944600000	2844200000	3027000000	2983400000	2409000000	2453700000	2430200000	2402900000	2503600000	1115500000	1148600000	1238600000	1109500000	1109600000	987140000	1046700000	909970000	928830000	859710000
B7Z992	GSN	Gelsolin	30	34858000000	480	3077000000	2939800000	2610400000	2829200000	3191600000	3968100000	3822100000	5182100000	2901500000	4420300000	48149000	40202000	28729000	0	17861000	0	0	57022000	0	0
A0A024R7T3	HNRPF	Heterogeneous nuclear ribonucleoprotein F	16	34407000000	559	1805500000	1774300000	1863200000	1761900000	1670400000	1563500000	1998900000	1857600000	1814500000	1855100000	1678400000	1810500000	1864700000	1865600000	1781600000	2349500000	2332700000	1955400000	1778900000	1975500000
A0A384ME16	GRB2	Growth factor receptor-bound protein 2	16	34276000000	494	2178400000	2271200000	2186500000	2128100000	2330500000	3336800000	3382500000	3871500000	2959800000	3730600000	564430000	614810000	615210000	544310000	538640000	846500000	888220000	618420000	746930000	716410000
Q6NZ52	RPL27A	60S ribosomal protein L27a	8	34198000000	205	1848100000	1871600000	1853900000	1803100000	1841100000	2055200000	2031700000	1863100000	1966300000	2114600000	1711100000	1982300000	1891900000	1977800000	1818200000	1919400000	1825900000	1835000000	1776000000	1722700000
A0A2R8Y811	RPS14	40S ribosomal protein S14	11	34010000000	456	1730900000	1705000000	1743200000	1679100000	1661900000	1644900000	1520200000	1596300000	1570800000	1751800000	1848300000	1850800000	1788800000	1853600000	1844300000	1837100000	1893500000	1683700000	1567800000	1883500000
B2RBR9	KPNB1	Importin subunit beta-1	34	33874000000	903	1721600000	1780800000	1839800000	1875000000	1780600000	1959000000	2062100000	1991200000	2027400000	2079300000	1561400000	1445600000	1438900000	1520900000	1570800000	1509100000	1566400000	1450400000	1570000000	1587100000
A0A1B0GUU9	IGHM	Ig mu chain C region	16	33734000000	334	3725800000	3807300000	3396900000	3482100000	3796100000	3836700000	3264700000	3731900000	3543600000	2893200000	0	0	0	0	0	0	0	0	0	0
F8W1R7	MYL6	Myosin light polypeptide 6	8	33629000000	283	1524400000	1442300000	1435300000	1426600000	1550100000	1266500000	1385800000	1468900000	1306800000	1673700000	2336800000	2369600000	2370100000	2452300000	2516200000	2263000000	2258100000	2218100000	2612200000	2314600000
Q9UNM1	EPFP1	10 kDa heat shock protein, mitochondrial	7	33142000000	172	1080400000	889980000	1009600000	913760000	900610000	812520000	848280000	952810000	1074900000	744130000	2581100000	2617700000	3230700000	3093000000	2698600000	2755400000	2351800000	3334100000	2831200000	2883800000
P26583	HMGB2	High mobility group protein B2	14	33084000000	478	1331700000	1258400000	1140700000	1224100000	1289100000	1994800000	1702600000	1976300000	1530300000	2081900000	1282400000	1271000000	1269800000	1467400000	1089400000	2427700000	2747300000	1378900000	2335000000	1882000000
A0A024R6W0	GOT2	Aspartate aminotransferase	23	32730000000	448	1360100000	1295600000	1325100000	1354100000	1325100000	949640000	748100000	1066600000	1116100000	806350000	2335600000	2619700000	2999400000	3086700000	2805000000	2378300000	2342100000	2872600000	2490000000	2239700000
P62277	RPS13	40S ribosomal protein S13	13	32621000000	294	1909800000	1965000000	1942100000	1810600000	1893300000	1811600000	2039000000	1889100000	1735100000	2137700000	1900500000	2090100000	1660900000	1846200000	1664000000	1648900000	1713800000	1416600000	1515200000	1887600000
H7BY10	RPL23A	60S ribosomal protein L23a	8	32157000000	258	1742000000	1908300000	1470700000	1903000000	1803400000	1987400000	1702900000	2034700000	1656700000	1969200000	1606900000	1650700000	1689200000	1863600000	1676500000	1847400000	1571000000	1532200000	1472000000	1874800000
A8K5I0	HEL-S-103	Heat shock 70 kDa protein 1B	24	32086000000	663	2639200000	2840600000	2554000000	2561400000	2706400000	1736500000	1541900000	1639000000	1641000000	1580800000	1813900000	1759400000	1658600000	1764900000	1763700000	936090000	880920000	992790000	891620000	1078900000
P62851	RPS25	40S ribosomal protein S25	5	31998000000	125	1849900000	1939100000	1846200000	1965600000	1944400000	1981800000	1816900000	1752200000	1626900000	1889400000	1760000000	2043100000	1645900000	1764500000	1648800000	1761800000	1831000000	1606700000	1453400000	1771200000
Q8WUM4	PDCD6IP	Programmed cell death 6-interacting protein	49	31388000000	897	1672900000	1662800000	1648300000	1674400000	1766500000	1773900000	1638100000	1806000000	1586000000	1853600000	1923500000	1824800000	1817700000	1777500000	1818300000	1640600000	1726500000	1741600000	1812200000	1624500000
B5BUB1	RUVBL1	RuvB-like 1	24	31330000000	655	1967400000	2024800000	2107300000	2018400000	1981000000	1642400000	1959800000	1840900000	2199700000	1991700000	1595300000	1630600000	1485900000	1501900000	1497000000	1423100000	1345700000	1350000000	1329700000	1242200000
Q0KKI6	HEL-213	Ig kappa chain C region	8	31294000000	313	1102400000	1123300000	1074900000	1048300000	1138900000	1096400000	1130200000	1088700000	1122600000	968140000	2875200000	2746500000	3117700000	2789300000	2918700000	1665900000	1947000000	2026400000	1875500000	1907100000
Q59H57	FUS	RNA-binding protein FUS	12	31245000000	297	1798900000	1811200000	1800100000	1754900000	1915200000	1814800000	1912300000	1775500000	2093100000	1700500000	1573700000	1552400000	1459600000	1311700000	1304100000	1534800000	1512800000	1080400000	1265200000	1439100000
P38159	RBMX	RNA-binding motif protein, X chromosome	12	31215000000	322	1714700000	1603400000	1787200000	1772400000	1841200000	2152000000	1893600000	1885900000	1683200000	1978400000	1377900000	1445600000	1666200000	1535200000	1257500000	1483800000	1606600000	1351200000	1557700000	1447500000
P14317	HCLS1	Hematopoietic lineage cell-specific protein	20	31196000000	626	1681700000	1500900000	1661300000	1629100000	1759300000	1394300000	1615900000	1759400000	1420600000	1804100000	1605500000	1669700000	1638900000	1803700000	1691500000	1588600000	1713000000	1570100000	1733600000	1453200000
P62081	RPS7	40S ribosomal protein S7	11	30863000000	362	1488200000	1475400000	1549200000	1527000000	1447300000	1364800000	1378500000	1200500000	1440900000	1419500000	2222900000	1805800000	1643300000	1969700000	2194100000	1746200000	1861800000	2211800000	1602600000	2003800000
V9HWC6	HEL-S-39	Peptidyl-prolyl cis-trans isomerase	14	30818000000	412	1721400000	1681900000	1619100000	1585400000	1722400000	1802400000	1767200000	1819200000	1676000000	1914900000	1543700000	1691300000	1875600000	1722300000	1620900000	1577700000	1905100000	1799300000	1945400000	1449200000
J3KTF8	ARHGDIA	Rho GDP-dissociation inhibitor 1	8	30788000000	244	1648300000	1460700000	1633500000	1508700000	1520700000	1595800000	1944300000	1812400000	1666900000	1928800000	2003100000	1843700000	1785300000	1778600000	1662700000	1824400000	1793400000	1432100000	1736900000	1758100000
J3KTA4	DDX5	Probable ATP-dependent RNA helicase DDX5	35	30612000000	561	1992900000	2152800000	2026300000	2045800000	1974200000	1912900000	1589900000	1349400000	1800200000	1645700000	1432800000	1585200000	1549900000	1550600000	1416700000	1739500000	1751600000	1277000000	838810000	1829700000
P27348	YWHAQ	14-3-3 protein theta	17	30606000000	446	1829800000	1850900000	1903600000	1833600000	1871100000	1779800000	1757600000	1729800000	1750700000	1893600000	1510900000	1414000000	1522400000	1501000000	1662200000	1639800000	1354600000	1089700000	1341800000	1551100000
Q13263	TRIM28	Transcription intermediary factor 1-beta	31	30558000000	799	2003400000	1954600000	1969100000	1975500000	2005500000	2030000000	2436300000	2137500000	2403600000	2377300000	1124900000	1007200000	1091600000	1024300000	1123100000	1480200000	1384800000	1171100000	1369400000	1439200000
P62917	RPL8	60S ribosomal protein L8	10	30181000000	298	1106600000	1311800000	1518300000	1174900000	1123800000	1197100000	1488500000	1111600000	1426800000	1696200000	1805400000	1683600000	1820400000	1775200000	1965000000	1787900000	1589300000	1933600000	1878000000	1993100000
B7Z9I1	ACADM	Medium-chain specific acyl-CoA dehydrogenase, mitochondrial	21	30107000000	442	703260000	647300000	714980000	740640000	725350000	611090000	579700000	796500000	705460000	627360000	3084500000	2979400000	3154900000	3002600000	2912300000	2227300000	2342400000	3035300000	3027400000	2069800000
D9IAI1	HEL-S-34	Phosphatidylethanolamine-binding protein 1	13	29592000000	400	1389700000	1378000000	1389100000	1374200000	1409400000	998560000	1215100000	1210500000	1066700000	1278300000	2013300000	1886600000	1979400000	2084300000	2034200000	2253400000	2403900000	1844400000	2148400000	2000100000
Q9NR30	DDX21	Nucleolar RNA helicase 2	41	29529000000	822	2024900000	2252100000	2150100000	2185600000	2137400000	1696800000	1432100000	1156600000	1591000000	1570300000	1353000000	1361700000	1515900000	1483600000	1344700000	1520300000	1475900000	1149400000	955950000	1672400000
Q5CAQ5	TRA1	Endoplasmin	43	29334000000	691	1651600000	1591700000	1668100000	1633300000	1717500000	1866400000	1735100000	1903300000	1903300000	1760700000	1312700000	1270200000	1490900000	1369200000	1367400000	1591500000	1412000000	2029000000	1899400000	1446400000
J3KQ32	OLA1	Obg-like ATPase 1	20	29051000000	544	2195000000	2235400000	2159000000	2140500000	2025300000	2120100000	2353600000	2028100000	2086400000	2260400000	769660000	799150000	983920000	889070000	1024700000	985530000	1020400000	930660000	1019300000	806030000
Q3B7A7	GART	Trifunctional purine biosynthetic protein adenosine-3	33	28927000000	783	2003000000	2111500000	1987500000	2065900000	2037000000	1771300000	1753900000	1702600000	1871100000	1729900000	1266800000	1248900000	1194800000	1177100000	1221900000	1370300000	1466000000	1029900000	1003500000	1535700000
P41091	EIF2S3	Eukaryotic translation initiation factor 2 subunit 3	21	28905000000	445	1975800000	2012200000	1878700000	1990600000	2013600000	1711500000	1707600000	1601800000	1605100000	1847200000	1494400000	1573300000	1338600000	1449000000	1371200000	1317400000	1379200000	1237900000	1181400000	1427100000
A4QPB0	IQGAP1	Ras GTPase-activating-like protein IQGAP1	75	28806000000	1161	1410100000	1441100000	1434400000	1448100000	1447700000	1962000000	1823000000	1938800000	1671900000	1933700000	1242200000	1321400000	1247900000	1304700000	1305900000	1806300000	1906300000	1654000000	2070100000	1751500000
A0A0S2Z4R1	YARS	Tyrosine--tRNA ligase, cytoplasmic	37	28766000000	706	1592500000	1627700000	1623100000	1594800000	1721800000	1743200000	1654400000	1671100000	1541300000	1629400000	1563900000	1712700000	1414600000	1481900000	1477700000	1499800000	1598500000	1766000000	1658000000	1490600000
A0A024R821	EIF3S9	Eukaryotic translation initiation factor 3 subunit B	42	28595000000	846	1436200000	1471300000	1415300000	1462600000	1440600000	1203100000	1214600000	1041500000	1128700000	1155700000	2070500000	2185900000	2022400000	2021000000	2131200000	1892600000	1899700000	1586800000	1512000000	2064400000
A0A2R8YEM3	RPL15	Ribosomal protein L15	10	28137000000	323	1118900000	1242300000	1273300000	1223900000	1306700000	1415300000	1449400000	1277200000	1389500000	1314800000	1813500000	1593600000	1449700000	1709000000	1704400000	1631500000	1773500000	1509600000	1427100000	1632600000
Q24JU4	EIF3A	Eukaryotic translation initiation factor 3 subunit A	60	27853000000	992	1491200000	1649000000	1532500000	1586200000	1533500000	1470300000	1389600000	1180700000	1357700000	1279400000	1766700000	1883800000	1593400000	1805900000	1751700000	1615700000	1549900000	1588500000	1587300000	1602900000
Q71UI9	H2AFV	Histone H2A.V	5	27741000000	109	1220200000	1276900000	1287100000	1142900000	1425700000	1803000000	1481200000	1606500000	1346700000	1586700000	1474600000	1413700000	1871300000	1805700000	1530600000	1944800000	1808100000	1835400000	2097900000	1921000000
Q9UKY7	CDV3	Protein CDV3 homolog	13	27733000000	459	1468600000	1524500000	1414600000	1467500000	1403300000	1826100000	1665100000	1609300000	1497800000	1756700000	1430800000	1307200000	1316800000	1293500000	1343100000	1489400000	1649700000	959910000	1166800000	1271500000
Q09028	RBBP4	Histone-binding protein RBBP4	15	27538000000	309	1760000000	1717400000	1657500000	1718500000	1726800000	1438700000	1356800000	1246400000	1352500000	1627600000	1526400000	1529300000	1626900000	1411000000	1368500000	1711300000	1719700000	1005500000	1143400000	1732600000
A0A024R652	MTHFD1	C-1-tetrahydrofolate synthase, cytoplasmic	38	26713000000	602	1697500000	1757100000	1737800000	1709800000	1733700000	1954700000	1971200000	1973900000	1924600000	2002000000	1000700000	1106100000	1080500000	1045200000	994370000	1215800000	1236800000	1028400000	1184300000	1097900000
S4R3N1	HSPE1-MOB4	MOB-like protein phocein	8	26711000000	182	1052700000	1135300000	1059800000	1185900000	1017700000	977780000	963460000	1191600000	995820000	843930000	1610700000	1789500000	1838400000	1692900000	1768400000	1667500000	1662000000	2513900000	2167200000	2019200000
P54136	RARS	Arginine--tRNA ligase, cytoplasmic	39	26703000000	815	1994300000	2184700000	2004000000	2172400000	2100700000	1750100000	1895200000	1862100000	1804600000	1848900000	955080000	996190000	964910000	995190000	964010000	758190000	762160000	831450000	799220000	756710000
F8W1A4	AK2	Adenylate kinase 2, mitochondrial	13	26577000000	379	1310500000	1193300000	1345100000	1229800000	1298200000	1483900000	1442300000	1604500000	1566800000	1490200000	1561400000	1507100000	1577800000	1609300000	1619800000	1415400000	1426600000	1491000000	1795200000	1374300000
A0A0U1RRM4	PTBP1	Polypyrimidine tract-binding protein 1	16	26505000000	631	1423000000	1526700000	1589600000	1535400000	1478400000	1449000000	1611100000	1601300000	1433700000	1626000000	1235700000	1053100000	1141700000	978810000	1237100000	1268400000	1285800000	1385600000	1270500000	1290900000
E7EX73	EIF4G1	Eukaryotic translation initiation factor 4 gamma 1	46	26412000000	867	1618800000	1612000000	1532100000	1535400000	1580300000	1480600000	1505000000	1415500000	1420100000	1571100000	1582200000	1450100000	1377400000	1432300000	1408900000	1319300000	1335200000	989200000	999470000	1367900000
A4D2P1	RAC1	Ras-related C3 botulinum toxin substrate 1	10	26363000000	287	1186000000	1174000000	1356000000	1307600000	1393300000	1614500000	1260400000	1497100000	1302500000	1141900000	1626500000	1596100000	1616400000	1751500000	1649200000	1339100000	1273000000	1537000000	1676600000	1742700000
A0A140VK56	TALDO1	Transaldolase	13	26312000000	280	1225200000	1203700000	1139300000	1162200000	1340700000	1602900000	1289200000	1475400000	1197200000	1442000000	1743300000	1880800000	1642300000	1712300000	1510300000	1736000000	1755200000	1598900000	1697700000	1792700000
Q6P2Q9	PRPF8	Pre-mRNA-processing-splicing factor 8	98	26171000000	1468	1247200000	1322200000	1351200000	1310000000	1347500000	1482600000	1367100000	1382300000	1335300000	1444000000	1573900000	1483200000	1572700000	1541500000	1516100000	1646700000	1604800000	1611600000	1542000000	1696700000
A0A384MTY2	COTL1	Coactosin-like protein	12	26162000000	301	717620000	763980000	764320000	783060000	861590000	1115000000	1077200000	1165900000	897870000	1053900000	1790300000	1699100000	1715300000	1810600000	1874900000	1983300000	2235800000	2058600000	2533200000	1978700000
A0A384MEE3	TUBB2B	Tubulin beta-2B chain	25	26150000000	166	1602200000	1423900000	1606200000	1272400000	1395200000	1511200000	1591200000	1597200000	1499000000	1430700000	1517500000	1606600000	1245400000	1354100000	1223800000	1070100000	1660100000	968420000	1282800000	1197100000
P42677	RPS27	40S ribosomal protein S27	6	25876000000	214	1404000000	1550000000	1418700000	1521200000	1535000000	1445000000	1332700000	1549800000	1258500000	1546100000	1435000000	1110200000	1066700000	1391100000	1181900000	1193600000	1189500000	1037000000	973560000	1333900000
V9HW41	HEL-S-71	Ubiquitin-conjugating enzyme E2 N	11	25698000000	283	949930000	990960000	1088100000	914460000	1089400000	1216300000	982860000	1080700000	817270000	1077600000	1928300000	1873000000	1825000000	1793800000	1759700000	1661500000	1749200000	1463200000	1694100000	1503200000
A0A087WXM6	RPL17	60S ribosomal protein L17	9	25665000000	419	998240000	968820000	1210200000	1035000000	990490000	996540000	1415200000	984270000	1171000000	1190700000	1792600000	1701100000	1484800000	1691100000	1813900000	1690900000	1476200000	1734600000	1660700000	2090800000
A2A2D0	STMN1	Stathmin	7	25657000000	230	1112000000	1212900000	1304600000	1178900000	1333000000	1449400000	1415300000	1419000000	1115900000	1549500000	1584700000	1650800000	1583700000	1624400000	1178200000	1952600000	2117200000	994460000	1740800000	1518000000
B4E0U6	ST13	Hsc70-interacting protein	10	25563000000	283	1692400000	1702500000	1655400000	1729100000	1805700000	1650400000	1478800000	1638700000	1394800000	1573300000	1241200000	1238300000	1098500000	1269800000	1165000000	1202400000	1221500000	1158000000	1175500000	1128000000
B2R6Q4	CSK	Non-specific protein-tyrosine kinase	25	25508000000	507	1425600000	1414600000	1434600000	1353000000	1470600000	1596800000	1558300000	1491000000	1515800000	1685700000	1416300000	1319700000	1372500000	1349800000	1386400000	1205000000	1327700000	1327500000	1479000000	1277700000
P11387	TOP1	DNA topoisomerase 1	30	25477000000	593	1410500000	1575100000	1448700000	1473000000	1509300000	1726900000	1543300000	1680500000	1405400000	1712500000	1115200000	1235700000	1295000000	1216600000	1114100000	1423800000	1445700000	1172300000	1275300000	1300500000
A0A024RB32	PTGES3	Prostaglandin E synthase 3	7	25418000000	211	1048900000	1123900000	1174300000	1173900000	1096800000	1197300000	1344800000	1217700000	1363500000	1338700000	1548000000	1885900000	2467200000	1910300000	1745100000	1583900000	1640200000	1153300000	986260000	1691300000
Q5VVD0	RPL11	60S ribosomal protein L11	6	25300000000	203	1325500000	1474700000	1277300000	1481500000	1439500000	1733700000	1652000000	1416100000	1344700000	1494700000	1241900000	1495500000	1211000000	1372600000	1144700000	1213700000	1304000000	1315200000	1109300000	1304600000
D6R9P3	HNRNPAB	Heterogeneous nuclear ribonucleoprotein A/B	11	25256000000	262	1482700000	1571600000	1404500000	1528400000	1676800000	1706500000	1365400000	1620000000	1540100000	1683400000	1208800000	1244500000	1165000000	1091600000	1032500000	1187900000	1281900000	887350000	1013900000	1103700000
Q15046	KARS	Lysine--tRNA ligase	27	25202000000	719	1746900000	1786900000	1686200000	1756200000	1827300000	1652800000	1601200000	1624500000	1519300000	1720800000	1064100000	1124600000	1002500000	1061500000	1054200000	995040000	1038700000	896610000	885740000	963460000
H0YN26	ANP32A	Acidic leucine-rich nuclear phosphoprotein 32 family member A	9	25198000000	306	1322700000	1199600000	1285500000	1170100000	1305300000	1614400000	1466500000	1429900000	1190000000	1544300000	1102500000	1278900000	1466400000	1273600000	1438400000	1583100000	1471300000	1380900000	1471200000	1313200000
CON__Q3SX09			14	25157000000	366	731900000	653710000	475520000	549340000	611930000	1090100000	884860000	4756700000	6653800000	1240200000	385500000	380000000	343840000	335560000	369020000	1069300000	649520000	3037000000	2158500000	1127800000
E5RI99	RPL30	60S ribosomal protein L30	6	24848000000	319	1291200000	1231200000	1134500000	1272000000	1273200000	1457600000	1237200000	1264200000	1377500000	1383500000	1318800000	1290400000	1178300000	1351500000	1268100000	1173600000	1346700000	1211200000	1194400000	1277600000
B3KXZ4	MCM2	DNA helicase	29	24586000000	620	1891900000	1969500000	2035400000	1940200000	2018600000	1786000000	1596500000	1321800000	1792200000	1627800000	619190000	625840000	572990000	543510000	524780000	1424300000	1513000000	517150000	719830000	1476100000
E9KL44	HADHA	Trifunctional enzyme subunit alpha, mitochondrial	31	24423000000	726	1378000000	1427400000	1465900000	1381100000	1431700000	1178200000	1191800000	1309200000	1331000000	1139000000	1514900000	1500700000	1542500000	1493500000	1518400000	1031900000	1079700000	1546000000	1486500000	1070000000
Q59FA2	SRSF1	Serine/arginine-rich splicing factor 1	14	24316000000	384	1285200000	1183000000	1131400000	1165900000	1167300000	1306000000	1277900000	1247900000	1134400000	1377300000	1051300000	1293500000	1476300000	1436800000	1544300000	1582200000	1617800000	1431200000	1578400000	1557400000
P49321	NASP	Nuclear autoantigenic sperm protein	18	24266000000	355	1508500000	1493700000	1429900000	1534900000	1453000000	1600900000	1550600000	1494500000	1472000000	1592200000	1314700000	1286800000	1248500000	1249100000	1154300000	1193600000	1336900000	623960000	920390000	1497300000
Q6IPH7	RPL14	60S ribosomal protein L14	6	24086000000	221	1368100000	1479500000	1319800000	1461800000	1276200000	1528500000	1352200000	1265700000	1459700000	1443400000	1220800000	1268500000	1385300000	1213400000	1307500000	1339900000	1442000000	1167700000	1052500000	1081800000
M0R3D6	RPL18A	60S ribosomal protein L18a	8	23967000000	274	945180000	1133900000	991110000	999440000	943750000	1023400000	1124800000	1080200000	1080700000	1040100000	1469900000	1383900000	1409500000	1528000000	1535400000	1234000000	1373900000	1183000000	1211400000	1403800000
Q8NC51	SERBP1	Plasminogen activator inhibitor 1 RNA-binding protein	17	23921000000	421	1550000000	1506400000	1261500000	1536200000	1447400000	1280100000	1432600000	1401300000	1433800000	1558800000	1075600000	859550000	818960000	858680000	859480000	1386500000	1298900000	881050000	792850000	1038000000
F8VY35	NAP1L1	Nucleosome assembly protein 1-like 1	17	23855000000	438	1023800000	1093500000	1130300000	1052100000	994500000	1056100000	1391200000	953340000	1216300000	1138500000	2057000000	1513100000	1523400000	1406500000	1768900000	1539600000	1540500000	1339000000	1222700000	1533900000
Q15691	MAPRE1	Microtubule-associated protein RP/EB family member 1	17	23762000000	420	1427600000	1514400000	1521000000	1491200000	1545300000	1674400000	1575900000	1637800000	1540300000	1786500000	991640000	1031900000	971750000	1003800000	995780000	1155700000	1221000000	954360000	1001900000	1054500000
B1AHB0	MCM5	DNA helicase	39	23615000000	689	1825700000	1850800000	1869100000	1813300000	1889800000	1687700000	1589200000	1302600000	1710600000	1639100000	610750000	700400000	591540000	575440000	533110000	1350400000	1378700000	528780000	722730000	1497100000
A8K517	RPS23	40S ribosomal protein S23	4	23487000000	165	1231900000	1213100000	1121100000	1179200000	1299600000	1359900000	1222300000	1125400000	1219500000	1313400000	1421400000	1326000000	1254100000	1269400000	1219000000	980430000	928900000	1082400000	1115800000	1479700000
A0A024RAI1	ACTR3	Actin-related protein 3	22	23425000000	481	1142200000	1184200000	1065600000	1152400000	1105100000	1088700000	1036900000	1061700000	1002200000	1127400000	1592200000	1652100000	1519400000	1582000000	1610600000	1484500000	1582600000	1387500000	1504200000	1542800000
B5BUB5	SSB	Lupus La protein	25	23383000000	536	1059600000	1019400000	1098800000	1036500000	1017700000	1172000000	1151800000	1169600000	1090800000	1237500000	1137600000	960100000	1414000000	1318200000	1384100000	1409400000	1245700000	1254700000	1274100000	1332300000
B2R7C5	MCM3	DNA helicase	40	23293000000	783	1691500000	1785600000	1764400000	1724900000	1778600000	1502000000	1588500000	1269800000	1642600000	1604700000	644800000	575110000	605870000	567680000	612700000	1412400000	1339200000	588690000	795300000	1480900000
B2R7T8	CAPZB	F-actin-capping protein subunit beta	21	23247000000	411	840260000	783150000	847730000	881220000	861780000	1480500000	1457500000	1642300000	1335200000	1553200000	1451200000	1343300000	1301400000	1397100000	1344400000	1436900000	1708300000	1589100000	1753900000	1382400000
C9JFR7	CYCS	Cytochrome c	8	23177000000	275	1575600000	1467900000	1677900000	1548500000	1596000000	1335300000	1178600000	1349200000	1273900000	1400500000	1313400000	1355200000	1310700000	1447000000	1237800000	836200000	821180000	931310000	817520000	739560000
Q13151	HNRNPA0	Heterogeneous nuclear ribonucleoprotein A0	10	23121000000	323	1348700000	1352200000	1491300000	1401300000	1339700000	1184200000	1292700000	1298200000	1430100000	1368300000	585530000	441600000	591430000	525590000	598430000	676400000	769890000	504610000	590070000	764630000
O75367	H2AFY	Core histone macro-H2A.1	16	22993000000	393	1549100000	1613800000	1704200000	1550000000	1687400000	1563800000	1414300000	1677200000	1396500000	1576200000	837520000	826350000	1035000000	874370000	847630000	897410000	1012400000	1091300000	1081400000	903920000
P48047	ATP5O	ATP synthase subunit O, mitochondrial	10	22971000000	317	1295000000	1260100000	1296100000	1295900000	1286300000	1061700000	954260000	1154400000	1245300000	956650000	1398100000	1436200000	1528900000	1422700000	1505500000	1382400000	1209900000	1431600000	1409100000	1207200000
A0A140VK94	RANBP1	Ran-specific GTPase-activating protein	9	22893000000	357	1398000000	1347600000	1311000000	1306900000	1319800000	1137700000	1353900000	1114500000	1194500000	1348100000	1327900000	1190600000	1077800000	1225100000	1210200000	1458900000	1361700000	909220000	1141900000	1313600000
E9PK01	EEF1D	Elongation factor 1-delta	9	22889000000	207	1105200000	1248600000	1005700000	1140200000	1171700000	1329800000	1306100000	1246500000	1156900000	1303200000	1390700000	1382200000	1176700000	1343500000	1183500000	1360200000	1549100000	1332700000	1481600000	1440600000
P07108	DBI	Acyl-CoA-binding protein	11	22868000000	222	750460000	736100000	729050000	772940000	819140000	689320000	696070000	733160000	587200000	809590000	2737300000	2188500000	2086400000	2200300000	1923800000	1434400000	1572500000	1350400000	1490600000	1110500000
B4DMF5	GLUD1	Glutamate dehydrogenase	25	22855000000	548	1014500000	993350000	984680000	961220000	1051900000	1011500000	938930000	1253800000	1087900000	931930000	1335000000	1366800000	1442400000	1436200000	1291400000	1626800000	1594400000	1917500000	2027800000	1482300000
Q16531	DDB1	DNA damage-binding protein 1	44	22763000000	791	1440800000	1560200000	1545100000	1583900000	1646600000	1309700000	1237800000	1143000000	1152500000	1306500000	1287900000	1329300000	1249200000	1209000000	1189400000	1135600000	1092400000	840850000	875820000	1211400000
A0A024R904	CACYBP	Calcyclin-binding protein	16	22716000000	361	930930000	913000000	1007300000	831470000	931120000	855180000	958200000	861130000	939030000	915880000	1722300000	1572200000	1675000000	1596400000	1678700000	1573900000	1628600000	1517700000	1427700000	1746900000
A0A024R8W0	DDX48	Eukaryotic initiation factor 4A-III	25	22672000000	406	1314100000	1489400000	1544300000	1373800000	1510500000	1568300000	1437800000	1489500000	1492300000	1487500000	907900000	882810000	873040000	962920000	880440000	1094100000	1052300000	887760000	919710000	1107800000
A0A024R8S5	P4HB	Protein disulfide-isomerase	30	22538000000	598	1346600000	1262900000	1372800000	1316400000	1471700000	1379100000	1385100000	1422000000	1374400000	1340000000	1006700000	1008300000	1091000000	1043900000	961580000	972010000	912330000	1164800000	1144100000	976250000
B2R4W8	hCG_1994130	40S ribosomal protein S15a	7	22509000000	211	1046300000	1060300000	1236700000	1110500000	1113900000	1075600000	1053400000	1010600000	1088300000	1095600000	1547800000	1487200000	1346900000	1358600000	1344000000	1457000000	1354400000	1198000000	1288700000	1567200000
B4DDF7	PPP2R1A	Serine/threonine-protein phosphatase 2A 65 kDa regulatory subunit A alpha isoform	28	22482000000	607	1152900000	1195900000	1256000000	1194800000	1199900000	1057600000	1090200000	1058200000	1091200000	1175000000	1477200000	1288200000	1331700000	1304800000	1376700000	1207000000	1302000000	1237600000	1381500000	1329600000
C9JXB8	RPL24	60S ribosomal protein L24	6	22428000000	192	1068100000	1135700000	1078500000	1106500000	1117300000	1285000000	1315600000	1207700000	1203700000	1268100000	1345500000	1409200000	1237500000	1421500000	1211000000	1398400000	1388600000	1323100000	1212100000	1365700000
V9HWH7	HEL-S-70p	Bifunctional purine biosynthesis protein PURH	39	22406000000	688	774460000	754860000	765050000	772720000	783220000	767250000	846130000	741590000	754100000	808070000	1791700000	1800500000	1757800000	1739100000	1819000000	1732600000	1830800000	1734700000	1880900000	1660900000
A0A0S2Z4A5	MCM7	DNA replication licensing factor MCM7	36	22382000000	656	1733000000	1866100000	1700300000	1784100000	1778100000	1505300000	1556800000	1234100000	1601300000	1551700000	622700000	568970000	549010000	534420000	482140000	1284500000	1231500000	541430000	747570000	1379800000
Q15056	EIF4H	Eukaryotic translation initiation factor 4H	8	22361000000	276	1114200000	1137600000	1023300000	1027500000	1143600000	1261200000	1258000000	1188700000	1133900000	1368500000	1354300000	1421300000	1337500000	1437500000	1293800000	1422000000	1382600000	940550000	1193400000	1245600000
A0A090N8Y2	ERP70	Protein disulfide-isomerase A4	34	22206000000	597	1060500000	1077000000	1068800000	1002200000	1162100000	1091000000	968100000	1021000000	937510000	991920000	1273100000	1349900000	1476500000	1356500000	1324100000	1392700000	1290400000	1336200000	1524400000	1336300000
M0R0F0	RPS5	40S ribosomal protein S5	11	22204000000	490	1224000000	1230200000	1270000000	1175300000	1252800000	1071400000	1211800000	1134900000	1111900000	1141500000	1516600000	1381300000	1194100000	1122000000	1244700000	1200100000	1315100000	910240000	906480000	1055100000
O75533	SF3B1	Splicing factor 3B subunit 1	57	22070000000	940	1214600000	1258000000	1336800000	1229700000	1298600000	1348100000	1266500000	1214500000	1203500000	1367100000	1027000000	1155400000	1168900000	1087800000	1109100000	1292700000	1308800000	1052700000	1079500000	1212400000
K7EKE6	LONP1	Lon protease homolog, mitochondrial	44	22036000000	695	1121200000	1063600000	1181400000	1171400000	1197400000	796580000	796050000	993240000	971440000	825590000	1625900000	1537000000	1715300000	1564900000	1635900000	1225200000	1209800000	1702300000	1514700000	1104700000
O14980	XPO1	Exportin-1	46	21925000000	833	1139000000	1206900000	1168500000	1115900000	1222200000	1233600000	1182100000	1127400000	1109800000	1279800000	1227800000	1172200000	1421500000	1306100000	1472500000	1244000000	1115200000	1138200000	1167100000	1087100000
P62316	SNRPD2	Small nuclear ribonucleoprotein Sm D2	9	21879000000	282	1060100000	1169900000	1029500000	1127400000	1151600000	1096700000	1074700000	1191300000	1044300000	1238400000	1305700000	1111600000	1228300000	1308000000	1171900000	1524000000	1285000000	982670000	1090800000	1565700000
P62318	SNRPD3	Small nuclear ribonucleoprotein Sm D3	5	21726000000	177	808870000	774390000	857710000	900330000	960610000	870180000	894560000	881870000	727700000	989220000	1480500000	1611000000	1307200000	1625300000	1289200000	1327900000	1687700000	1250500000	1247700000	1512400000
A0A024RAC5	RCC2	Protein RCC2	22	21569000000	469	857440000	864830000	887480000	861790000	861720000	1628100000	1537300000	1530700000	1519700000	1893600000	1022700000	983840000	1036300000	1062800000	942630000	1304200000	1375300000	984660000	1242300000	1232300000
Q9Y3U8	RPL36	60S ribosomal protein L36	5	21494000000	100	1154900000	1175400000	1150400000	1195200000	1216100000	1306400000	1286100000	1190900000	1205700000	1229000000	1180200000	1175000000	1210300000	1212600000	1178000000	1105900000	1250500000	1174300000	1215600000	1265200000
B4DY09	ILF2	Interleukin enhancer-binding factor 2	18	21377000000	418	1156800000	1069100000	1197000000	1017400000	1146200000	1216000000	1238800000	1160400000	1119900000	1176300000	1179400000	1186600000	1327600000	1167400000	1204500000	1300800000	1313800000	1203600000	1355200000	1204000000
Q15393	SF3B3	Splicing factor 3B subunit 3	38	21340000000	636	1250200000	1239200000	1261600000	1332700000	1329600000	1324200000	1249700000	1180600000	1192700000	1269200000	1012700000	1079700000	1096600000	1090100000	1042800000	1236600000	1154800000	1038700000	1064400000	1284600000
B0ZBD0	RPS19	40S ribosomal protein S19	10	21204000000	226	1102500000	1098100000	1107600000	1138600000	1118800000	1124900000	1062800000	1066000000	998550000	1207600000	1413100000	1466200000	1285900000	1475100000	1414400000	1276000000	1242200000	1066800000	1081200000	1244300000
A4D177	CBX3	Chromobox protein homolog 3	8	21169000000	221	1304600000	1266900000	1345000000	1282700000	1217300000	1364900000	1422500000	1260800000	1370900000	1355700000	1147300000	954710000	1020600000	827520000	889590000	1156200000	1016000000	943120000	1023100000	1447700000
A0A140VJX1	ACAT1	Acetyl-CoA acetyltransferase, mitochondrial	21	21081000000	395	844880000	828080000	904020000	867530000	913020000	851020000	776000000	1081500000	985190000	752910000	1364800000	1481300000	1568500000	1539800000	1471000000	1354700000	1253500000	1798400000	1628900000	1283800000
V9HWJ0	HEL-S-164nA	Neutral alpha-glucosidase AB	41	21009000000	678	1174100000	1110000000	1210500000	1194100000	1242000000	1325100000	1411500000	1534000000	1451600000	1363300000	907090000	1140500000	1038300000	996100000	1029000000	1024200000	875400000	1155400000	1146800000	1047800000
A0A140VK44	PSMA6	Proteasome subunit alpha type	13	20798000000	322	862360000	959090000	940710000	949340000	994080000	1612800000	1657400000	1590200000	1478300000	1713800000	1161200000	1156200000	1048500000	1191400000	1175100000	979560000	981300000	888170000	1084600000	905810000
Q14566	MCM6	DNA replication licensing factor MCM6	31	20731000000	494	1500300000	1671300000	1683200000	1585200000	1660500000	1352900000	1404100000	1114600000	1443600000	1326600000	528940000	599370000	536660000	494270000	494530000	1274900000	1421300000	515400000	704710000	1435700000
A0A024R3Q3	ARF1	ADP-ribosylation factor 1	13	20691000000	336	840990000	933270000	931850000	955250000	974120000	1038600000	1041000000	927580000	876310000	975230000	1238600000	1152000000	1356300000	1299400000	1503600000	1294300000	1330200000	1669300000	1612600000	1321500000
Q7Z4W8	RPL22	60S ribosomal protein L22	5	20549000000	84	1269100000	1466400000	1190600000	1347300000	1336700000	1652300000	1492200000	1459200000	1325700000	1316500000	863440000	982550000	933400000	960860000	936600000	854670000	868030000	920050000	848850000	831280000
X1WI28	RPL10	60S ribosomal protein L10	10	20483000000	408	942270000	1048300000	929140000	1022500000	992190000	1136500000	992270000	1291300000	1174800000	914520000	1485600000	1193300000	871810000	1114200000	1111500000	868020000	959690000	991120000	1039600000	1043300000
E1NZA1	PRIC295	Translational activator GCN1	111	20431000000	1502	1262600000	1321300000	1248900000	1298700000	1317600000	1160200000	1233900000	1204700000	1242600000	1254500000	1087100000	1093200000	1078200000	1065700000	1112500000	931570000	886630000	884460000	894930000	908930000
Q1KMD3	HNRNPUL2	Heterogeneous nuclear ribonucleoprotein U-like protein 2	31	20382000000	570	1182200000	1150300000	1187700000	1181200000	1284600000	1270200000	1317900000	1407900000	1197200000	1387800000	983590000	893880000	1030600000	995400000	1007100000	1008600000	1014100000	1096400000	1186100000	872750000
P42166	TMPO	Lamina-associated polypeptide 2, isoform alpha	30	20221000000	478	1105200000	1147400000	1158300000	1121100000	1190200000	1321500000	1169300000	1201300000	1297000000	1178100000	991610000	957150000	1067300000	958280000	987070000	1188800000	1267100000	926920000	1198400000	1315700000
A0A384NYN5	VCL	Vinculin	49	20113000000	460	14363000	31480000	41990000	25947000	27230000	0	0	0	0	0	2785300000	2604300000	2602700000	2733000000	2648500000	1982600000	2184400000	2065600000	2428800000	1799700000
Q15717	ELAVL1	ELAV-like protein 1	15	20080000000	333	893580000	948870000	930480000	978340000	931760000	1082700000	1037900000	1136700000	955230000	1151700000	1108700000	1223800000	1330900000	1233900000	1159900000	1392400000	1398500000	1104600000	1316700000	1271100000
Q59EK6	TRAP1	Heat shock protein 75 kDa, mitochondrial	29	20067000000	507	1267400000	1283200000	1317100000	1281300000	1294400000	1079400000	1004000000	1138600000	1314700000	1011300000	1149800000	1045100000	1141400000	1086400000	1016600000	1043900000	957800000	826000000	821580000	1035700000
Q53G99	PS1TP5BP1	Actin, cytoplasmic 1	28	20044000000	137	0	0	0	0	0	0	0	0	0	0	0	0	0	0	0	0	0	0	0	1674700000
A0A090N8G0	GARS		28	20043000000	620	994210000	1078600000	1035600000	1000600000	1087600000	941350000	899760000	819400000	952480000	878300000	1311600000	1177200000	1271100000	1347600000	1498600000	1117200000	1242200000	1223600000	1097200000	1014000000
P42766	RPL35	60S ribosomal protein L35	5	19941000000	156	1021200000	1026900000	1052300000	966310000	1018700000	1061300000	1197200000	1043700000	1010900000	1165400000	1266200000	1205100000	1073400000	1149000000	926820000	986330000	1037600000	855030000	952640000	1216400000
A0A384MTR2	PRDX3	Thioredoxin-dependent peroxide reductase, mitochondrial	9	19939000000	235	1023500000	1044200000	1047000000	1040500000	966710000	896020000	891310000	1111400000	1136600000	879460000	1237500000	1137700000	1266500000	1185500000	1242000000	1178000000	1199800000	1545800000	1472000000	1052500000
P05023	ATP1A1	Sodium/potassium-transporting ATPase subunit alpha-1	31	19782000000	536	1482300000	1393800000	1406000000	1515300000	1557000000	1563100000	1197800000	1313800000	1308500000	864900000	843550000	797920000	799020000	781740000	750590000	785290000	830560000	681220000	726120000	1219100000
Q5TEC6	HIST2H3PS2	Histone H3	5	19751000000	50	721000000	878430000	0	1103000000	0	1008500000	871290000	1155500000	1173900000	619450000	0	0	1527800000	1602900000	1540600000	1255700000	1322200000	2466800000	2119100000	2397600000
X5D2J9	GTF2I	General transcription factor II-I	51	19735000000	728	774980000	728520000	720740000	784860000	771180000	758110000	799690000	844350000	779260000	888870000	1450600000	1447500000	1544100000	1445700000	1460400000	1593400000	1572700000	1347300000	1401000000	1476800000
O75643	SNRNP200	U5 small nuclear ribonucleoprotein 200 kDa helicase	81	19646000000	1101	1052500000	1089500000	1009100000	1012600000	1041800000	1084400000	1026900000	1024000000	1061700000	1113000000	1131600000	1084900000	1197300000	1093500000	1179800000	1287800000	1273300000	1157400000	1173600000	1218600000
Q8IWR8	RPL19	Ribosomal protein L19	5	19642000000	234	1023000000	1036700000	959350000	929950000	1065900000	1355300000	941870000	850640000	1018400000	873140000	1044400000	1219900000	803350000	878140000	938760000	738920000	780320000	835430000	830740000	911500000
A0A024R324	RHOA	Transforming protein RhoA	10	19566000000	226	930410000	873360000	1012500000	1066200000	1092600000	905610000	936430000	1169600000	1100100000	742710000	1052400000	1006000000	1098500000	1093300000	1138200000	1264800000	1235800000	1487700000	1438100000	1478100000
O43390	HNRNPR	Heterogeneous nuclear ribonucleoprotein R	25	19547000000	476	964180000	916180000	973860000	888840000	895310000	1007400000	1184800000	1187800000	1054800000	1164800000	1120800000	1061100000	1225900000	1032400000	1110800000	1280200000	1317800000	1118100000	1312600000	1149800000
P62942	FKBP1A	Peptidyl-prolyl cis-trans isomerase FKBP1A	6	19518000000	225	853410000	625960000	741320000	712660000	819010000	765120000	772490000	611950000	673970000	900560000	1562700000	1610500000	1341600000	1490000000	1291100000	1290700000	1239800000	1204000000	1363500000	1032100000
D3YTB1	RPL32	60S ribosomal protein L32	8	19504000000	254	889430000	815180000	901790000	922910000	805100000	872220000	1027600000	881460000	912770000	1008600000	1137600000	1066100000	924570000	1253500000	1186200000	1142500000	1065100000	1066400000	1077300000	1089800000
F8VZJ2	NACA	Nascent polypeptide-associated complex subunit alpha	5	19453000000	197	1050700000	1062000000	962380000	1078000000	1084200000	1030600000	1017100000	816160000	925440000	983910000	1360500000	1237100000	1205500000	1225600000	1232700000	1249600000	1172100000	975060000	936550000	1308200000
V9HWH6	HEL-S-156an	Purine nucleoside phosphorylase	18	19419000000	556	1008200000	985050000	1013600000	1053200000	949280000	821730000	1045900000	866890000	928410000	810640000	1238700000	1114800000	1111900000	1075400000	1182100000	1397300000	1337900000	1220700000	1161800000	1145300000
Q9UNX3	RPL26L1	60S ribosomal protein L26-like 1	8	19385000000	188	966840000	1033500000	848430000	1024700000	947280000	1218200000	921250000	974860000	930840000	1050600000	1140500000	1215600000	1124000000	1325600000	1093000000	1147200000	1373300000	1019400000	1242800000	1121700000
P49588	AARS	Alanine--tRNA ligase, cytoplasmic	33	19197000000	631	1195300000	1220300000	1163200000	1172100000	1279100000	1395800000	1379700000	1323500000	1313500000	1336800000	851630000	824770000	792160000	775360000	885730000	766560000	805580000	893140000	772570000	685510000
O00567	NOP56	Nucleolar protein 56	32	19163000000	512	984130000	981170000	1008700000	1015300000	1077100000	1040900000	1039100000	1124100000	1110200000	1040600000	1065700000	970940000	1107200000	1016700000	1005200000	945320000	1029200000	1220000000	1094800000	1068200000
CON__P06868			49	19098000000	490	269410000	72790000	99237000	15445000	72533000	367610000	352770000	4267800000	8928000000	684850000	4595500	48442000	16286000	20950000	50503000	367910000	100650000	1694900000	2227300000	297960000
B2R4C1	RPL31	60S ribosomal protein L31	7	19079000000	165	890580000	1053900000	1010700000	1163200000	948980000	1089300000	1120100000	1041900000	1009900000	1074100000	1257400000	1049100000	1139400000	937710000	1164700000	1061400000	1122100000	641040000	1023200000	1135700000
B4DLA6	MCM4	DNA replication licensing factor MCM4	37	18995000000	697	1371100000	1407300000	1386800000	1369000000	1362900000	1174600000	1261600000	962080000	1329000000	1231700000	564500000	596790000	531700000	411650000	461840000	1156300000	1156200000	567540000	648180000	1328300000
A0A024R994	CPNE3	Copine-3	23	18991000000	454	971720000	902270000	910930000	870800000	889530000	853220000	922440000	995100000	930300000	969470000	1204700000	1268600000	1120000000	1195800000	1188700000	1345500000	1243100000	1236000000	1242100000	1293200000
Q86UX7	FERMT3	Fermitin family homolog 3	31	18989000000	575	1178400000	1195600000	1139600000	1192800000	1295700000	1440900000	1361100000	1381500000	1397200000	1296900000	625740000	609460000	658490000	664460000	654470000	875850000	940740000	1194700000	1050600000	759830000
A0A384NQ35	PSME1	Proteasome activator complex subunit 1	17	18942000000	395	1078200000	1028600000	1067200000	1112700000	1139800000	1538200000	1523600000	1601500000	1314600000	1592300000	793210000	797930000	745930000	824600000	762180000	701430000	691720000	954790000	1032500000	618640000
A0A024RDY0	RANBP5	Importin-5	43	18866000000	823	658720000	656860000	650470000	667910000	673100000	408930000	554520000	507560000	521720000	530200000	1755100000	1541500000	1546100000	1558800000	1773500000	1492600000	1589300000	1240600000	1411600000	1587400000
P63313	TMSB10	Thymosin beta-10	3	18860000000	72	0	584640000	0	0	354120000	0	0	0	0	0	1648100000	1933900000	0	0	0	0	0	0	0	0
Q53EL0	PTPN6	Tyrosine-protein phosphatase non-receptor type	26	18675000000	339	1999600000	1501400000	1956400000	2112700000	1724000000	2054600000	2203400000	1856600000	1774600000	2401600000	15509000	8803300	10796000	18292000	78648000	0	18513000	17404000	76075000	0
Q8TAS0	ATP5C1	ATP synthase subunit gamma	11	18575000000	270	729710000	810260000	777240000	752890000	788770000	683780000	661270000	825470000	754680000	695950000	1282600000	1318700000	1353500000	1360300000	1201800000	1162900000	1154800000	1440400000	1647500000	1209400000
B4DVQ5	EIF3C	Eukaryotic translation initiation factor 3 subunit C	29	18550000000	581	1018900000	1000500000	1024300000	983080000	1035100000	1010500000	862070000	748490000	906350000	906890000	1198700000	1329700000	1080400000	1233700000	1080100000	1023400000	1057000000	991340000	987360000	1087400000
Q3ZCM7	TUBB8	Tubulin beta-8 chain	10	18473000000	171	1005100000	755030000	888350000	708570000	539400000	584440000	1179900000	613770000	978920000	637940000	1580200000	845010000	1247800000	1004700000	1242100000	1473100000	1292300000	954620000	1453000000	1343800000
A0A024R6D4	ERH	Enhancer of rudimentary homolog	4	18395000000	133	1110400000	1270300000	1170100000	1263300000	1313100000	1258100000	1169000000	1250400000	1113700000	1310000000	738890000	813280000	864980000	883060000	724860000	855470000	879950000	762640000	633800000	843420000
Q13177	PAK2	Serine/threonine-protein kinase PAK 2	28	18383000000	495	811850000	819800000	795260000	836120000	802750000	828890000	934660000	835540000	713660000	920660000	1155800000	1211700000	1062000000	1233400000	1126100000	1453400000	1558800000	1162300000	1361300000	1466100000
A3RJH1	DDX1	ATP-dependent RNA helicase DDX1	38	18296000000	685	1151000000	1170500000	1102900000	1153000000	1166400000	1150200000	1156200000	1257300000	1096800000	1241000000	775640000	796960000	840130000	835500000	797920000	860790000	850420000	860260000	822740000	716580000
P17096	HMGA1	High mobility group protein HMG-I/HMG-Y	5	18272000000	327	1093300000	1074700000	992670000	1100500000	1057500000	1302600000	1246100000	1332400000	1114700000	1290100000	689820000	967860000	919020000	999500000	831540000	572200000	588480000	689790000	756480000	683420000
Q53XC0	EIF2S1	Eukaryotic translation initiation factor 2 subunit 1	23	18067000000	376	1173700000	1288600000	1144100000	1258700000	1263200000	1240900000	1094600000	1156400000	1059700000	1220700000	822700000	855250000	824180000	828200000	941350000	787440000	832450000	726390000	787330000	824250000
A0A024R0E5	CAPZA1	F-actin-capping protein subunit alpha-1	12	18055000000	362	711830000	662200000	746850000	707610000	707150000	1277800000	1320500000	1279500000	1170100000	1300100000	1005100000	956870000	955350000	963360000	981640000	1058500000	1020000000	1237900000	1283600000	968190000
CON__P01966	HBA2		8	18049000000	325	743270000	720530000	548780000	710070000	658880000	655080000	487300000	1894200000	3470500000	794290000	633120000	471290000	603670000	415140000	460780000	939680000	417730000	1997800000	1261400000	945680000
A0A0A0MR02	VDAC2	Voltage-dependent anion-selective channel protein 2	12	18020000000	354	1253600000	878000000	1362300000	1170300000	1154400000	1030300000	882420000	1029200000	1027700000	642500000	577530000	680410000	968460000	938910000	829640000	694960000	774550000	1287800000	833490000	1087800000
I3L0N3	NSF	Vesicle-fusing ATPase	36	17973000000	515	1238600000	1232600000	1195200000	1221900000	1383300000	953430000	1012000000	1197400000	1011300000	1178900000	890030000	991000000	999990000	996360000	951460000	592870000	660520000	737560000	771040000	575600000
A0A0S2Z3L0	ETFA	Electron transfer flavoprotein subunit alpha, mitochondrial	13	17945000000	350	803620000	821800000	751740000	820830000	891140000	712990000	803570000	1021500000	1012800000	826900000	1038200000	913540000	1003000000	981400000	1000900000	1020100000	995800000	1193400000	1309800000	829150000
H3BNC9	RPS17	40S ribosomal protein S17	8	17898000000	256	1066100000	959510000	1024000000	1052100000	664570000	474210000	1070300000	723500000	983480000	708480000	1178400000	910640000	1142500000	989990000	1210400000	1119300000	1034700000	1369200000	1087500000	1131400000
P25786	PSMA1	Proteasome subunit alpha type-1	15	17869000000	330	753120000	696270000	690780000	672840000	743220000	1327800000	1278700000	1212200000	1145900000	1543200000	968310000	1102700000	929960000	1102500000	906850000	864690000	803810000	755030000	857010000	851100000
Q9Y5B9	SUPT16H	FACT complex subunit SPT16	33	17848000000	500	1098900000	1134000000	1112500000	1108600000	1163400000	1114900000	1031300000	984170000	991150000	1158600000	772410000	821420000	904680000	875330000	812020000	975290000	968770000	686340000	778230000	1026300000
B4DV28	CNDP2	Cytosolic non-specific dipeptidase	23	17834000000	459	958160000	993800000	1036000000	1013300000	938730000	676570000	764170000	701440000	668720000	711280000	1283500000	1193500000	1206200000	1190300000	1259400000	1056000000	1162100000	1087900000	1234800000	1025300000
Q8NCF7	SLC25A3	Phosphate carrier protein, mitochondrial	12	17810000000	225	909330000	857940000	1056100000	1118800000	923590000	1058800000	831580000	943900000	1057200000	650410000	966420000	878290000	1115300000	1051800000	1064200000	816850000	855270000	1589500000	1121300000	1245500000
Q13200	PSMD2	26S proteasome non-ATPase regulatory subunit 2	42	17771000000	736	906960000	1078800000	934130000	934970000	935130000	1003600000	901670000	867530000	960120000	988370000	1131100000	1094200000	942300000	978550000	985990000	948110000	885700000	755610000	791190000	949110000
F8VPD4	CAD	CAD protein	71	17705000000	904	865750000	1001100000	954780000	962700000	956250000	1169500000	1115500000	1031100000	1137500000	1069800000	793050000	800770000	712770000	756230000	733300000	1085500000	1101300000	1049100000	1026900000	1128200000
P53621	COPA	Coatomer subunit alpha	47	17702000000	744	951550000	971400000	989210000	978630000	949540000	1060900000	1079800000	1085300000	1062100000	1110900000	933890000	979080000	937820000	993010000	983170000	927900000	976600000	951890000	933170000	1004700000
Q9Y266	NUDC	Nuclear migration protein nudC	17	17672000000	299	1296300000	1270100000	1196200000	1147000000	1207500000	1193300000	1150400000	1069200000	1056600000	1222600000	608580000	632570000	651520000	713780000	595290000	721850000	684460000	463090000	530270000	694500000
Q53GL5	IDH2	Isocitrate dehydrogenase [NADP], mitochondrial	25	17639000000	524	1093900000	980910000	1105500000	957300000	1093900000	755060000	727110000	915400000	805140000	772300000	568890000	582150000	671280000	627240000	629450000	1220200000	1250300000	1386600000	1582600000	977560000
Q08J23	NSUN2	tRNA (cytosine(34)-C(5))-methyltransferase	39	17630000000	675	1686600000	1650000000	1694900000	1620700000	1681200000	1176200000	1106700000	1108400000	1211900000	1190700000	495770000	497370000	475720000	497270000	469780000	466440000	474290000	427730000	423730000	490050000
Q5U0A0	PSMA5	Proteasome subunit alpha type	10	17421000000	264	743700000	870150000	821900000	769120000	752720000	1005200000	1062300000	1059300000	904730000	1218700000	1044300000	1094800000	1114700000	1043200000	1192600000	994930000	904870000	900640000	916350000	908970000
P38117	ETFB	Electron transfer flavoprotein subunit beta	16	17407000000	271	840780000	838990000	860100000	780000000	890890000	859940000	809690000	1155900000	916200000	837670000	967910000	1023900000	1078500000	1160800000	1011200000	960650000	1017600000	1300400000	1338800000	961230000
A0A024R608	RPLP1	60S acidic ribosomal protein P1	5	17357000000	162	867230000	801470000	833770000	845430000	755340000	782960000	1002300000	725520000	824850000	793730000	1256000000	1043000000	1139500000	943600000	1371800000	1079400000	1143200000	1169800000	1121400000	1078600000
E5RIW3	TBCA	Tubulin-specific chaperone A	11	17243000000	244	922250000	867140000	870560000	977870000	714520000	878320000	986600000	822460000	866330000	1056300000	1136900000	1169400000	938540000	1066100000	936530000	1048200000	1035500000	951480000	1259900000	1045000000
P55327	TPD52	Tumor protein D52	11	17235000000	346	725040000	622030000	662390000	601980000	653290000	516740000	602070000	729620000	521530000	678300000	1624500000	1441600000	1471100000	1610300000	1729300000	1043400000	1187400000	1082000000	1257600000	860060000
Q9BTQ7	RPL23	60S ribosomal protein L23	5	17217000000	190	926100000	957090000	963910000	931140000	902900000	879470000	999500000	882950000	983620000	1049300000	1011300000	940300000	1002100000	925260000	1038700000	969090000	973730000	926690000	887620000	954140000
A0A0K0K1K4	PSMA7	Proteasome subunit alpha type-7	13	17152000000	265	782010000	741580000	779740000	738720000	774210000	1190500000	1258200000	1160400000	1140400000	1346100000	1103300000	999600000	938440000	970200000	946830000	799450000	840130000	844150000	1031500000	834700000
P62136	PPP1CA	Serine/threonine-protein phosphatase PP1-alpha catalytic subunit	20	17111000000	518	867060000	882630000	884130000	812910000	876670000	781430000	946580000	921370000	837880000	900950000	951330000	926170000	965390000	981490000	1042900000	1191400000	1169400000	946680000	1030300000	997100000
Q9UH65	SWAP70	Switch-associated protein 70	32	17109000000	442	482280000	480700000	511680000	451820000	423130000	1167100000	1101100000	1112000000	930900000	1149900000	1466600000	1351300000	1347500000	1327600000	1337400000	939930000	987390000	893210000	892080000	872410000
P05141	SLC25A5	ADP/ATP translocase 2	15	17045000000	182	979520000	862270000	1094400000	918450000	850500000	847660000	811170000	765430000	953920000	596950000	721490000	910600000	1209000000	1023100000	1022000000	1138500000	969760000	1325300000	948390000	1323400000
Q96BS4	FBL	rRNA 2-O-methyltransferase fibrillarin	14	16973000000	308	808450000	747140000	791800000	751290000	827030000	623380000	851230000	824150000	846450000	918060000	982340000	1070100000	1202800000	1000700000	947970000	1106800000	1043700000	1083500000	1003700000	1108800000
Q9Y3I0	RTCB	tRNA-splicing ligase RtcB homolog	25	16960000000	467	1186300000	1100200000	1017300000	1117700000	1170600000	1187400000	1106400000	1178000000	1068900000	1229400000	666750000	693580000	668150000	724050000	743940000	724490000	708190000	795010000	721290000	758500000
Q15029	EFTUD2	116 kDa U5 small nuclear ribonucleoprotein component	41	16937000000	690	982200000	995920000	980090000	1014200000	908080000	893130000	844530000	829370000	854580000	909900000	963190000	975940000	949220000	891020000	928270000	1028300000	1001200000	967990000	938040000	996120000
Q6IAX2	RPL21	60S ribosomal protein L21	9	16907000000	165	1015800000	906040000	958850000	882740000	991700000	701570000	1067300000	1118600000	967020000	974050000	1206800000	1222500000	870120000	974030000	868650000	856430000	774950000	814320000	860380000	1019400000
P11388	TOP2A	DNA topoisomerase 2-alpha	59	16902000000	784	999620000	982670000	1010900000	946250000	1073600000	1228700000	1008800000	954880000	1164800000	1075800000	732920000	704610000	710960000	705580000	663410000	1215100000	1170300000	564540000	772760000	1196800000
P61160	ACTR2	Actin-related protein 2	16	16769000000	316	866030000	811960000	784500000	786710000	879070000	708310000	785600000	813400000	811170000	829560000	1151900000	1180600000	1008300000	1163400000	1034300000	972750000	1109000000	1023800000	1149000000	1036200000
A0A024R0Y5	PFKM	ATP-dependent 6-phosphofructokinase	31	16766000000	523	652080000	673830000	722150000	701290000	675960000	439760000	536510000	546010000	624480000	574770000	1497000000	1535200000	1284300000	1364400000	1334500000	1176800000	1249500000	1183200000	1237500000	1102400000
Q59G75	IARS	Isoleucine--tRNA ligase, cytoplasmic	51	16762000000	701	898730000	947620000	934710000	945190000	933070000	829580000	913480000	793330000	862020000	872280000	1102600000	1063600000	986590000	967520000	1063600000	893300000	873140000	944600000	932790000	901330000
A0A384NPU2	HINT1	Histidine triad nucleotide-binding protein 1	8	16753000000	185	1315000000	1279300000	1219600000	1367300000	1475300000	1142800000	1019300000	1084700000	994490000	1381300000	599380000	606020000	593910000	676220000	563420000	692860000	627700000	509200000	586490000	765780000
Q6LET3	HPRT1	Hypoxanthine-guanine phosphoribosyltransferase	11	16716000000	333	679270000	595380000	647210000	591050000	621310000	805050000	859150000	793300000	730170000	896910000	1464700000	1432700000	1291100000	1314200000	1289300000	1034800000	1023600000	807220000	1007800000	815340000
A0A384NPU5	PDIA6	Protein disulfide-isomerase A6	18	16701000000	394	910990000	844030000	889700000	897180000	905200000	888950000	919930000	909640000	975460000	977060000	880650000	744890000	929180000	804450000	912880000	957910000	823120000	1025900000	1136500000	848250000
B4E0X8			22	16670000000	301	939040000	921690000	917250000	968330000	906610000	1380600000	1177900000	1301100000	1148000000	1532300000	560150000	612020000	610520000	588610000	510580000	893870000	874030000	657290000	794880000	941560000
P46087	NOP2	Probable 28S rRNA (cytosine(4447)-C(5))-methyltransferase	21	16611000000	442	1151100000	1126700000	1196300000	1152900000	1154800000	996090000	887090000	893430000	872940000	979010000	737830000	797450000	825740000	793740000	727510000	749580000	840720000	640940000	661930000	858340000
A0A0S2Z410	HSD17B10	3-hydroxyacyl-CoA dehydrogenase type-2	18	16560000000	446	859940000	888450000	931050000	839110000	821290000	573900000	728030000	771520000	831860000	647910000	1168600000	1055900000	1130300000	1065300000	1226300000	931570000	938460000	1041800000	1164300000	926230000
A0A024R4Z6	SSRP1	FACT complex subunit SSRP1	25	16500000000	415	985630000	1011400000	1056400000	1046700000	1058600000	940790000	1007600000	904110000	943110000	1030200000	784110000	753520000	845830000	817330000	782940000	939560000	981000000	681550000	766680000	933560000
Q5U0F4	EIF3I	Eukaryotic translation initiation factor 3 subunit I	16	16445000000	353	878820000	1006100000	816380000	949660000	940060000	865280000	652310000	616290000	701030000	696350000	1039400000	992680000	1016300000	1011000000	927600000	957040000	951520000	824240000	711520000	1066200000
B1ALA9	PRPS1	Ribose-phosphate pyrophosphokinase 1	15	16408000000	331	892500000	934730000	921500000	831700000	893240000	877470000	921880000	765900000	793050000	889450000	826380000	853220000	911320000	866640000	765850000	1011700000	944870000	903710000	951720000	854730000
A0A3B3IUA2			10	16398000000	193	928640000	871250000	869540000	895200000	889900000	954430000	869800000	979030000	880630000	1063200000	875020000	941500000	1024700000	931610000	843970000	1056400000	1071900000	815190000	809810000	930020000
V9HWK0	HEL103	Signal recognition particle subunit SRP72	22	16355000000	329	1136900000	1271700000	1198500000	1221500000	1296200000	1073100000	1082000000	1033300000	1065900000	1094800000	745080000	674880000	623510000	674390000	684250000	662480000	675900000	717350000	719990000	636280000
J3QLE5	SNRPN	Small nuclear ribonucleoprotein-associated protein	9	16295000000	291	793940000	644920000	759010000	689390000	716570000	819630000	735610000	852760000	698040000	918870000	948000000	1085700000	970120000	1052100000	811010000	963900000	1135000000	843910000	1047000000	923290000
Q9UMS4	PRPF19	Pre-mRNA-processing factor 19	15	16293000000	369	933720000	933900000	1004800000	940200000	1004800000	1000500000	978870000	981800000	960370000	995440000	708860000	766070000	692620000	674130000	659070000	816360000	783510000	748340000	697390000	781990000
Q9Y3F4	STRAP	Serine-threonine kinase receptor-associated protein	19	16234000000	426	840010000	927250000	821030000	781410000	857040000	868410000	857450000	836110000	820630000	900490000	1021500000	1010900000	1017900000	1035700000	1007600000	1013900000	954670000	718390000	753260000	1098400000
J3QRS3	MYL12A	Myosin regulatory light chain 12A	9	16219000000	258	650760000	657000000	599740000	647550000	624150000	574020000	647320000	622600000	554090000	678810000	1140800000	1185700000	1282200000	1260800000	1305900000	1124800000	1224100000	1196900000	1160500000	1116900000
A0A140VK69	GOT1	Aspartate aminotransferase, cytoplasmic	23	16027000000	519	1041900000	1103800000	991760000	1036700000	1071300000	829660000	891910000	906650000	802700000	908210000	1017400000	901120000	895070000	840790000	926250000	679750000	736120000	676120000	782050000	664480000
Q9NZI8	IGF2BP1	Insulin-like growth factor 2 mRNA-binding protein 1	23	16027000000	310	1870300000	1792500000	2020000000	1902700000	2141000000	631840000	1683900000	1426000000	1904000000	683440000	177170000	85214000	0	0	0	27855000	89190000	0	100720000	69011000
Q53GX7	TARS	Threonine--tRNA ligase, cytoplasmic	32	15962000000	508	1471300000	1490100000	1595100000	1483300000	1527900000	1037300000	1089400000	1026000000	983750000	1110600000	385230000	468180000	382270000	409150000	415900000	391100000	431800000	427350000	388480000	407750000
B2R4R9	RPS28	40S ribosomal protein S28	3	15951000000	101	934550000	968290000	967230000	941080000	939680000	872920000	874340000	850950000	797900000	951800000	1038500000	973270000	761600000	904350000	834260000	908370000	931480000	724090000	738710000	943100000
O60664	PLIN3	Perilipin-3	20	15948000000	392	628860000	582240000	638420000	563940000	535260000	611440000	657830000	780650000	566490000	675030000	1215100000	1009000000	1266900000	1140900000	1284700000	1287600000	1305700000	1228000000	1202200000	784280000
Q6FIG4	RAB1B	Ras-related protein Rab-1B	7	15938000000	232	876480000	820910000	953210000	899310000	859000000	847800000	840580000	702510000	752320000	631050000	746360000	822900000	902680000	982090000	907110000	741910000	707840000	960950000	956180000	760880000
Q6IBN0	PSMD3	26S proteasome non-ATPase regulatory subunit 3	30	15874000000	564	903000000	999990000	935330000	917460000	965570000	998340000	881450000	869800000	920840000	935180000	840820000	874200000	834580000	862150000	827390000	782050000	851240000	794840000	800330000	839310000
Q53F35	ANP32B	Acidic leucine-rich nuclear phosphoprotein 32 family member B	7	15825000000	193	818770000	810400000	844640000	782100000	927900000	964030000	867290000	828760000	808740000	977790000	720260000	815180000	812070000	768030000	690060000	889750000	919500000	619350000	777310000	925050000
B4DJX1	DLAT	Acetyltransferase component of pyruvate dehydrogenase complex	17	15779000000	314	1197600000	1216800000	1174800000	1255200000	1163300000	929050000	944980000	1031700000	1046100000	805450000	647120000	717620000	691970000	655410000	826680000	604510000	539180000	698030000	669730000	523010000
U6FVB0	CD74-Ntrk1 fusion gene	Tyrosine-protein kinase receptor	7	15743000000	236	804280000	656880000	804510000	692070000	687200000	679290000	531220000	493400000	594360000	425830000	1001300000	985840000	1234400000	1243600000	1193300000	1064200000	934020000	1502700000	950120000	1319400000
A0A024R394	CHORDC1	Cysteine and histidine-rich domain-containing protein 1	16	15737000000	304	1459100000	1445000000	1645800000	1372800000	1411000000	1317400000	1443200000	1340600000	1325600000	1415800000	264420000	277190000	211730000	172880000	244130000	253440000	235390000	188230000	234070000	300220000
P82979	SARNP	SAP domain-containing ribonucleoprotein	9	15711000000	185	715600000	733080000	638900000	724520000	745180000	832270000	728380000	799440000	659960000	851010000	938690000	1016100000	994140000	1075300000	913270000	1125400000	1056900000	831050000	1090600000	1120800000
P47897	QARS	Glutamine--tRNA ligase	35	15701000000	640	1023900000	995490000	1030800000	1036300000	1072600000	1047000000	901850000	955710000	906130000	1001600000	807730000	823770000	816210000	811630000	800910000	610410000	669530000	669400000	626360000	647970000
Q8WVC2	RPS21	40S ribosomal protein S21	6	15628000000	163	874560000	1005900000	839070000	1029300000	898150000	934600000	881650000	917330000	824860000	763940000	986120000	882990000	836440000	899990000	888060000	717850000	804460000	676470000	761890000	989120000
V9HW35	HEL-S-55	Peroxiredoxin-5, mitochondrial	11	15486000000	330	855140000	707570000	827900000	762290000	792900000	683120000	708330000	911420000	739730000	706300000	930500000	942260000	972590000	982110000	1034500000	875080000	879920000	1219600000	1196200000	731180000
A0A0S2Z4Z0	RBM14	RNA-binding protein 14	24	15481000000	425	876770000	842880000	815010000	894840000	909870000	954640000	984510000	1063600000	929320000	1029500000	728920000	739860000	718780000	769010000	662960000	858010000	821970000	699120000	848380000	786480000
O00425	IGF2BP3	Insulin-like growth factor 2 mRNA-binding protein 3	21	15481000000	438	906960000	905080000	932810000	922010000	1019900000	890350000	1040900000	969810000	967700000	1061700000	804980000	724630000	767250000	782040000	786740000	739470000	748160000	666490000	776390000	649290000
P01861	IGHG4	Ig gamma-4 chain C region	12	15475000000	155	0	0	0	0	0	0	0	0	0	0	1959000000	2120200000	2029600000	1971300000	1921900000	1546100000	1613100000	1607800000	2150200000	1779800000
V9HWG7	HEL-S-52	WD repeat-containing protein 1	24	15448000000	546	850980000	938500000	845020000	913070000	864910000	841930000	852700000	962960000	840280000	937640000	830420000	778280000	716620000	724330000	764120000	844770000	831030000	905040000	908220000	803710000
J3QL05	SRSF2	Serine/arginine-rich splicing factor 2	4	15378000000	150	989100000	1027200000	979370000	1028300000	1013100000	1091400000	999340000	1010500000	988580000	1082800000	706930000	610860000	585810000	664250000	653100000	683240000	709930000	629490000	671010000	709010000
Q5TZP7	APEX1	DNA-(apurinic or apyrimidinic site) lyase	19	15300000000	392	802500000	920760000	973680000	931500000	857670000	700940000	715030000	764420000	621280000	803450000	700610000	663430000	833470000	801830000	828700000	828430000	850900000	902200000	846180000	848360000
B2RBE5	NAA15	N-alpha-acetyltransferase 15, NatA auxiliary subunit	35	15277000000	483	1061200000	1126400000	1031800000	1094400000	1044800000	1051800000	1118800000	1025800000	953810000	1058800000	687340000	729400000	622330000	656930000	618910000	593740000	613640000	488120000	504740000	722710000
H9ZYJ2	TXN	Thioredoxin	7	15192000000	168	323240000	288400000	383310000	306050000	302200000	318180000	561590000	460670000	502350000	463850000	1584100000	1397500000	1264300000	1191600000	1217200000	1239600000	1464400000	1379500000	1265700000	1151200000
Q13435	SF3B2	Splicing factor 3B subunit 2	33	15190000000	525	891740000	936710000	920820000	916970000	963580000	985470000	925450000	1038400000	899900000	1060100000	761480000	819600000	686470000	752450000	652310000	744780000	801270000	625510000	720190000	720440000
Q59GB4	DPYSL2	Dihydropyrimidinase-related protein 2	23	15157000000	348	121110000	117110000	100270000	140750000	136100000	238370000	206530000	248980000	166410000	243500000	1604100000	1031900000	911810000	984840000	1387100000	1987400000	2043000000	1962500000	2327600000	1763100000
Q6IAX5	EIF3E	Eukaryotic translation initiation factor 3 subunit E	24	15101000000	409	857740000	875650000	825430000	866610000	813500000	891800000	739630000	666640000	771870000	751960000	965970000	967480000	871250000	950220000	880070000	853180000	883460000	838280000	857360000	929930000
J3KR44	OTUB1	Ubiquitin thioesterase OTUB1	15	15084000000	317	1179600000	1196600000	1056100000	1214100000	1271300000	1012600000	930830000	1102200000	938900000	1095300000	482510000	512390000	544680000	568440000	539070000	488220000	567680000	587630000	577130000	428900000
A0A140VJZ1	USP5	Ubiquitin carboxyl-terminal hydrolase 5	28	15071000000	614	722290000	736530000	759140000	722560000	786910000	828450000	700820000	729820000	760650000	794850000	984920000	911440000	1021200000	926430000	993830000	926740000	948190000	827360000	919150000	801670000
A0A024R1P2	RAC2	Ras-related C3 botulinum toxin substrate 2	9	15024000000	190	484230000	431730000	561110000	480740000	491580000	606980000	613370000	715950000	507280000	570610000	710030000	820240000	830400000	815300000	789570000	843100000	862230000	1189100000	1160600000	902760000
A8K2U2	HK2	Hexokinase	40	15023000000	591	870320000	860100000	978560000	955640000	1041400000	1103300000	1023500000	1058500000	1051800000	1088300000	658580000	678900000	753570000	655140000	681970000	619840000	557620000	683350000	584720000	634300000
Q07666	KHDRBS1	KH domain-containing, RNA-binding, signal transduction-associated protein 1	11	15009000000	277	716980000	710440000	802600000	697190000	756300000	786500000	767700000	689830000	707630000	915210000	694060000	731850000	834580000	829460000	825770000	952930000	994860000	788110000	898140000	864540000
Q53Z07	RPL9	60S ribosomal protein L9	8	15005000000	248	828120000	761530000	750460000	792060000	693610000	817110000	905350000	840450000	871540000	838400000	904030000	836590000	863150000	812050000	908910000	848280000	787560000	1006800000	908350000	879780000
Q9Y2X3	NOP58	Nucleolar protein 58	22	14973000000	414	625760000	744230000	701160000	761860000	762590000	796510000	785060000	839960000	812400000	784990000	848310000	884930000	834720000	878010000	775380000	890080000	850760000	863530000	817250000	817250000
Q53R19	ARPC2	Actin-related protein 2/3 complex subunit 2	22	14855000000	408	688140000	682670000	590350000	647470000	678190000	638000000	673930000	658550000	648830000	799560000	1067700000	988920000	880320000	850730000	937410000	930490000	928580000	787190000	889590000	914110000
P22695	UQCRC2	Cytochrome b-c1 complex subunit 2, mitochondrial	14	14796000000	376	914640000	860270000	944730000	886180000	899080000	711160000	748010000	984630000	969340000	755120000	840150000	808810000	966350000	894360000	897190000	620100000	552340000	852180000	789470000	587040000
A0A0B4J1Z1	SRSF7	Serine/arginine-rich splicing factor 7	7	14723000000	200	814720000	838750000	829070000	836450000	812550000	794340000	832630000	829150000	817700000	864750000	751620000	719670000	848760000	833200000	751290000	906390000	933690000	790590000	915470000	844720000
B7ZLP5	SAFB	Scaffold attachment factor B1	21	14714000000	371	822410000	837640000	843180000	776870000	871280000	895590000	900560000	855610000	859350000	1020100000	735200000	779180000	809590000	739010000	755190000	761650000	916580000	685780000	749890000	768720000
V9HWI0	HEL-S-165mP	Alcohol dehydrogenase [NADP(+)]	20	14669000000	386	1036700000	1026400000	1051300000	1082400000	1075300000	984690000	920910000	1073700000	882330000	1033400000	543600000	533840000	504580000	565310000	495980000	631040000	570300000	649950000	675590000	489120000
Q8N995	HMGCS1	Hydroxymethylglutaryl-CoA synthase, cytoplasmic	21	14661000000	345	1235700000	1266900000	1453200000	1359900000	1372300000	1072900000	969850000	839510000	957550000	1070700000	743610000	576340000	575430000	645490000	607250000	155420000	156510000	141460000	51766000	275640000
P54578	USP14	Ubiquitin carboxyl-terminal hydrolase 14	23	14633000000	443	628570000	706440000	666850000	650080000	644810000	649380000	714590000	695020000	651130000	678820000	1002200000	937330000	940110000	905640000	947600000	921240000	910820000	835900000	873500000	812960000
Q5QTS3	RPL13A	60S ribosomal protein L13a	11	14524000000	243	752140000	827210000	696350000	781740000	735420000	873630000	771850000	764880000	783020000	729390000	776770000	792390000	875420000	659690000	622630000	661140000	679950000	825590000	793950000	835740000
P27824	CANX	Calnexin	19	14479000000	342	1000700000	784450000	943680000	904410000	906780000	1132900000	973670000	968120000	1048700000	691680000	475380000	526110000	629870000	677850000	664440000	660770000	583710000	968860000	635270000	857160000
A0A024R7B7	CDC37	Hsp90 co-chaperone Cdc37	12	14421000000	318	706100000	742610000	678580000	695410000	727110000	626330000	666740000	685190000	614940000	658280000	857820000	815390000	849350000	819770000	907610000	832910000	873160000	792780000	818110000	758220000
P33316	DUT	Deoxyuridine 5-triphosphate nucleotidohydrolase, mitochondrial	10	14403000000	278	1078500000	1118700000	1154700000	1061200000	1050300000	874880000	896440000	587400000	804290000	818370000	562700000	500030000	569640000	485720000	571640000	968740000	915760000	170850000	321530000	981980000
O76021	RSL1D1	Ribosomal L1 domain-containing protein 1	25	14345000000	521	899450000	973610000	858730000	1007400000	940800000	721840000	728700000	706830000	666730000	762710000	605230000	669740000	769210000	734210000	653940000	783650000	763940000	771300000	639960000	736630000
O43143	DHX15	Pre-mRNA-splicing factor ATP-dependent RNA helicase DHX15	31	14323000000	483	809240000	843330000	820690000	822460000	939640000	878200000	876250000	888790000	864840000	1051000000	690530000	664900000	698070000	672540000	642350000	837630000	831540000	676030000	676080000	803400000
P13073	COX4I1	Cytochrome c oxidase subunit 4 isoform 1, mitochondrial	9	14322000000	191	1060700000	898820000	1039700000	995590000	880340000	903620000	765070000	846850000	914830000	637120000	540570000	580220000	708560000	739740000	641200000	664230000	496330000	498510000	448830000	823560000
A0A024QZ30	SDHA	Succinate dehydrogenase [ubiquinone] flavoprotein subunit, mitochondrial	23	14290000000	468	773740000	826350000	760650000	793850000	700470000	894500000	869900000	1054700000	935630000	734820000	759180000	692450000	758780000	727420000	828570000	644270000	527810000	713800000	826420000	616620000
Q53GD8	FKBP3	Peptidyl-prolyl cis-trans isomerase	13	14285000000	249	1096300000	1076500000	1089900000	993290000	1217300000	1059400000	976080000	1085900000	965380000	1144500000	497620000	403640000	555630000	429700000	507210000	449770000	519670000	303980000	439140000	491780000
P18077	RPL35A	60S ribosomal protein L35a	5	14248000000	118	721590000	757600000	806110000	802000000	841590000	891230000	830990000	794900000	764170000	804740000	803070000	941900000	838760000	791570000	692870000	703790000	911590000	796120000	771460000	811470000
E9PKG1	PRMT1	Protein arginine N-methyltransferase 1	18	14180000000	326	951510000	957380000	983010000	967370000	924930000	725750000	658660000	592830000	653380000	695710000	949740000	897520000	810490000	897550000	873570000	753290000	734040000	579280000	451550000	893560000
Q16891	IMMT	MICOS complex subunit MIC60	25	14117000000	465	850960000	733050000	879490000	868520000	777860000	893140000	661760000	846520000	891910000	570660000	513400000	686510000	882250000	808950000	812520000	692300000	655160000	984430000	873760000	848570000
P31930	UQCRC1	Cytochrome b-c1 complex subunit 1, mitochondrial	16	14085000000	473	788090000	804380000	858250000	840020000	824130000	672780000	735020000	837530000	823510000	693040000	788040000	796240000	1009600000	818450000	858410000	644430000	563720000	758480000	745780000	578890000
K7ELL7	PRKCSH	Glucosidase 2 subunit beta	20	14047000000	403	736840000	861760000	792950000	791960000	836270000	787030000	785520000	840480000	731890000	790410000	751120000	758820000	716170000	814490000	784750000	655270000	714540000	739280000	726360000	704310000
A0A140VK70	PSMC2	26S protease regulatory subunit 7	33	13995000000	580	808000000	792350000	798830000	832260000	806230000	858800000	817740000	714650000	854500000	789110000	787260000	761040000	709200000	785730000	806690000	688020000	697400000	697160000	669820000	770230000
A0A2Z6ATB6	DBN1	Drebrin	19	13975000000	320	958300000	934090000	944790000	941020000	1030700000	744940000	698570000	824360000	747000000	685660000	626770000	598190000	688720000	694090000	650390000	754570000	795280000	515120000	551360000	664820000
P62495	ETF1	Eukaryotic peptide chain release factor subunit 1	17	13933000000	288	1016100000	1058100000	967870000	1051400000	984970000	1004900000	872830000	787280000	827640000	933440000	639800000	637810000	602630000	646010000	581470000	605490000	644230000	459050000	535070000	581980000
A0A024R8S3	SUMO2	Small ubiquitin-related modifier	1	13927000000	26	0	0	0	0	0	0	0	0	0	0	0	0	0	0	0	0	0	0	530060000	0
A0A158RFU6	RAB7A	Ras-related protein Rab-7a	15	13859000000	356	745590000	623030000	762700000	749410000	725930000	780880000	672510000	652790000	709620000	537650000	676130000	687340000	807020000	809210000	762380000	858680000	926910000	1227300000	984790000	1070200000
A0A1W2PNV4			18	13858000000	262	593520000	613370000	565770000	595770000	618180000	629680000	629080000	619930000	605540000	665440000	1079500000	1079800000	815660000	939620000	768270000	809810000	986770000	801070000	1052800000	957660000
B4DJB4	IDH3A	Isocitrate dehydrogenase [NAD] subunit, mitochondrial	14	13843000000	354	832710000	847000000	848200000	858320000	865710000	614950000	529550000	705560000	736080000	567940000	872630000	900160000	843410000	874460000	786780000	648160000	623070000	711670000	730630000	676580000
P49458	SRP9	Signal recognition particle 9 kDa protein	3	13794000000	79	701450000	728270000	737360000	745050000	750300000	724270000	787970000	818930000	709690000	818610000	799750000	740800000	753270000	724600000	774700000	873540000	996460000	759480000	837190000	770020000
A0A024QZK8	HNRPH3	Heterogeneous nuclear ribonucleoprotein H3	10	13793000000	204	662670000	630650000	640970000	648990000	665780000	746900000	778040000	839610000	705660000	766600000	754890000	738140000	845800000	816840000	828500000	841190000	802080000	775060000	856200000	713380000
Q16666	IFI16	Gamma-interferon-inducible protein 16	31	13786000000	489	371430000	361170000	392110000	330180000	336530000	585160000	434170000	521050000	573380000	541250000	1166600000	1197600000	1086000000	1184700000	1064400000	976210000	946670000	1091300000	1177100000	929550000
Q9BR63	FARSB	Phenylalanine--tRNA ligase beta subunit	27	13734000000	488	514410000	573780000	534780000	560610000	630970000	703840000	679240000	694190000	596840000	687610000	971190000	978920000	867780000	994170000	1000500000	852110000	867580000	853460000	875370000	881520000
P52209	PGD	6-phosphogluconate dehydrogenase, decarboxylating	22	13730000000	320	111350000	138110000	123160000	148350000	74842000	558050000	572810000	542720000	445350000	605520000	1361300000	1322900000	1263000000	1248400000	1351900000	1281000000	1221400000	1099500000	1319800000	1249800000
Q01813	PFKP	ATP-dependent 6-phosphofructokinase, platelet type	31	13718000000	531	340290000	326310000	377480000	346290000	344870000	420710000	421470000	456000000	410890000	404650000	1386300000	1198200000	1346000000	1283700000	1346900000	990510000	1045500000	1286200000	1282600000	857860000
A0A384MTX4	TCEA1	Transcription elongation factor A protein 1	20	13658000000	366	552170000	552000000	578310000	586610000	609430000	766440000	727480000	825750000	646690000	864490000	768850000	831920000	831980000	899730000	770670000	976560000	976020000	647570000	892050000	860160000
A0M8W4	UBE2V2	Ubiquitin-conjugating enzyme E2 variant 2	8	13636000000	157	757020000	726590000	744600000	709190000	751360000	797950000	710100000	839280000	648490000	877060000	634490000	809900000	820260000	780710000	794590000	823620000	870170000	676950000	802100000	779250000
O43776	NARS	Asparagine--tRNA ligase, cytoplasmic	23	13623000000	483	702960000	760000000	785020000	726520000	752510000	622700000	722460000	700410000	685040000	701910000	814960000	782460000	828770000	828540000	863570000	837420000	810660000	823040000	725930000	741760000
Q53FT8	PSMB1	Proteasome subunit beta type	11	13592000000	247	609770000	532720000	578010000	574050000	568790000	936720000	934490000	932600000	851800000	920140000	998460000	869040000	861490000	838080000	909610000	715500000	714840000	665630000	859300000	574430000
Q9BUF5	TUBB6	Tubulin beta-6 chain	25	13567000000	306	405790000	428510000	430300000	457410000	485310000	593840000	560740000	660420000	701900000	627860000	1052400000	925790000	1013300000	931140000	1050800000	964660000	875290000	784730000	890870000	1016900000
A0A024R3W7	EEF1B2	Elongation factor 1-beta	8	13544000000	213	836000000	808510000	857830000	809610000	777120000	745420000	739820000	635550000	692460000	693200000	761060000	650910000	739080000	740840000	794960000	815060000	765880000	742570000	739070000	693410000
A8KAQ5	SNRP70	U1 small nuclear ribonucleoprotein 70 kDa	15	13514000000	375	732210000	739840000	662930000	735070000	682230000	753620000	810450000	823520000	670790000	922930000	751570000	748930000	737040000	741740000	680480000	756350000	785610000	559770000	711190000	749260000
Q53HA4	SARS	Serine--tRNA ligase, cytoplasmic	18	13471000000	431	833190000	820730000	788530000	796320000	880420000	748770000	779860000	795960000	783350000	843450000	686760000	662420000	662190000	651550000	615460000	675330000	683980000	736550000	675700000	620240000
A0A024R5J5	RAB6A	Ras-related protein Rab-6A	11	13469000000	161	675790000	541990000	696250000	652770000	675980000	719240000	677630000	761490000	595370000	511150000	664580000	688690000	816310000	802630000	728770000	696460000	698770000	1139000000	973900000	893380000
A0A286YF22	PHGDH	D-3-phosphoglycerate dehydrogenase	17	13406000000	224	1431400000	1494400000	1463800000	1533700000	1541900000	1239300000	1293900000	1322300000	1362400000	1305700000	0	0	0	0	0	0	0	0	0	0
Q59GY3	HEL-S-91	Serine/arginine-rich splicing factor 6	9	13306000000	143	867600000	966120000	840390000	935940000	1005800000	974970000	821780000	849660000	783710000	859620000	500580000	613520000	609990000	579250000	603100000	616930000	658560000	512730000	489220000	668850000
Q53Y51	DDT	D-dopachrome decarboxylase	10	13272000000	323	881920000	949930000	982340000	988120000	1005300000	725460000	787920000	840160000	680320000	860800000	615340000	487700000	544200000	536840000	585410000	510900000	510460000	441030000	527480000	419210000
A0A1W2PPH1	ME2	NAD-dependent malic enzyme, mitochondrial	23	13262000000	390	413260000	459150000	447850000	430860000	476400000	482150000	516530000	608990000	592430000	466350000	1039000000	1008800000	1062100000	1100200000	1115100000	913390000	896620000	1135300000	1245600000	893420000
Q6FI03	G3BP	Ras GTPase-activating protein-binding protein 1	17	13255000000	359	986750000	1116100000	979350000	958290000	921260000	686570000	693290000	538840000	754860000	687790000	601810000	584900000	540680000	565940000	551280000	630290000	522280000	488240000	363370000	688110000
O60264	SMARCA5	SWI/SNF-related matrix-associated actin-dependent regulator of chromatin subfamily A member 5	45	13244000000	716	757080000	852310000	814100000	800970000	818540000	923460000	712290000	754530000	730510000	825500000	611470000	717210000	651340000	701450000	568090000	689120000	705860000	558570000	551820000	716400000
A0A024RDH8	RPL34	60S ribosomal protein L34	3	13202000000	70	750900000	858850000	704370000	795030000	765870000	830130000	762040000	774930000	705540000	786610000	836450000	947650000	709230000	787900000	642980000	810470000	0	630400000	807970000	859520000
P25789	PSMA4	Proteasome subunit alpha type-4	14	13123000000	275	562380000	525710000	603860000	587300000	606370000	989310000	967020000	833000000	841920000	962440000	760890000	742280000	747730000	798490000	917740000	713730000	648250000	643370000	671790000	615240000
B0QY89	EIF3L	Eukaryotic translation initiation factor 3 subunit L	26	13094000000	561	691610000	688390000	679890000	743550000	694550000	660020000	675040000	548290000	658960000	624970000	871580000	814330000	760680000	821090000	834130000	738280000	713160000	745330000	761340000	714760000
Q13509	TUBB3	Tubulin beta-3 chain	24	13070000000	385	340190000	343410000	357650000	317690000	250920000	315620000	478390000	403340000	578200000	410260000	1197500000	888900000	857080000	799060000	1308600000	661230000	684380000	725780000	763330000	637610000
P46013	MKI67	Antigen KI-67	91	13061000000	892	612220000	645510000	594870000	644750000	688660000	1007600000	817420000	770430000	803710000	874240000	620610000	710880000	636340000	663180000	560640000	1106000000	1217200000	0	535100000	1120300000
A0A2R8Y425	CHD4	Chromodomain-helicase-DNA-binding protein 4	66	13040000000	727	667160000	722910000	719310000	712470000	668250000	754330000	720810000	635250000	819180000	771650000	694990000	702910000	768830000	740530000	701290000	858120000	870810000	622490000	665070000	808950000
Q567R6	SSBP1	Single-stranded DNA-binding protein	9	12966000000	198	609620000	629110000	625050000	570150000	537510000	480930000	536730000	640480000	743560000	459560000	896260000	951090000	936490000	863030000	861410000	708460000	672410000	928370000	817500000	748410000
A0A024QZT4	SERPINB9	Serpin B9	21	12933000000	294	0	0	0	0	0	48428000	49510000	30650000	25619000	44770000	1668500000	1671500000	1635300000	1621500000	1673100000	1297900000	1278100000	1517200000	1683200000	1205000000
P55084	HADHB	Trifunctional enzyme subunit beta, mitochondrial	23	12931000000	371	766690000	747120000	769850000	740940000	870990000	651220000	541840000	801020000	749260000	653110000	695490000	818370000	822780000	861730000	801620000	572520000	612590000	761500000	797050000	546310000
Q9NY33	DPP3	Dipeptidyl peptidase 3	29	12892000000	428	818310000	895020000	864080000	870280000	923310000	849110000	892900000	1000800000	797360000	946250000	559950000	531040000	517430000	507640000	568800000	503200000	546470000	517050000	600180000	489010000
O95433	AHSA1	Activator of 90 kDa heat shock protein ATPase homolog 1	17	12884000000	390	587880000	600590000	572240000	620390000	583840000	618590000	574030000	597230000	557250000	594550000	872610000	839920000	796970000	852510000	891880000	804020000	784600000	650010000	674180000	871880000
B2RCM2	LARS	Leucine--tRNA ligase, cytoplasmic	45	12835000000	612	653670000	663630000	666330000	664590000	734510000	668380000	652390000	685870000	629660000	669030000	825970000	809550000	827770000	837240000	845370000	708760000	733090000	744240000	740490000	734380000
A0A140VK53	SRRM2	Serine/arginine repetitive matrix protein 2	32	12829000000	534	618780000	613970000	627670000	608700000	607830000	646420000	650640000	657680000	594510000	684950000	782120000	807750000	875260000	786710000	714750000	902060000	917640000	622990000	739560000	825920000
V9HWF9	HEL20	3(2),5-bisphosphate nucleotidase 1	15	12775000000	340	586820000	579590000	614970000	555240000	631800000	543710000	604170000	648270000	519410000	578090000	956720000	944530000	893720000	909130000	923760000	753470000	847990000	816770000	877620000	740920000
A0A024R7A8	AKR1B1	Aldose reductase	14	12765000000	255	706170000	706470000	720430000	707490000	772730000	504370000	615940000	631780000	520790000	722040000	920120000	856790000	674960000	755540000	620310000	652410000	664380000	690750000	828280000	683340000
Q86SZ7	PSME2	Proteasome activator complex subunit 2	13	12735000000	371	708080000	633890000	664920000	677670000	643590000	955760000	947670000	813250000	868190000	874790000	663540000	800640000	675960000	689380000	717010000	602730000	476370000	585250000	647170000	475510000
P61221	ABCE1	ATP-binding cassette sub-family E member 1	25	12698000000	388	729530000	786210000	763360000	809890000	795250000	693370000	741750000	617760000	735940000	703740000	722750000	635240000	680060000	678720000	707170000	663770000	653550000	648460000	590330000	658680000
X5DNM4	GLO1	Lactoylglutathione lyase	13	12647000000	254	815200000	746110000	827090000	838570000	943240000	1127700000	1055400000	1044800000	914680000	1185800000	385780000	398660000	421650000	433290000	407500000	499850000	480640000	419040000	447930000	508860000
A0A024R1K8	SF3A1	Splicing factor 3A subunit 1	30	12628000000	607	698630000	774790000	718700000	756890000	653960000	773720000	652520000	723710000	639810000	823610000	560710000	548630000	581970000	537410000	555580000	669800000	657000000	481930000	604380000	665370000
B4DG62	HK1	Hexokinase	39	12579000000	566	640730000	613710000	695610000	667100000	657470000	765820000	606680000	756270000	635740000	669650000	644490000	663250000	726640000	735130000	752050000	666600000	658590000	1017400000	938910000	721980000
P56537	EIF6	Eukaryotic translation initiation factor 6	10	12441000000	184	712640000	695940000	714320000	717530000	733540000	731620000	913330000	776720000	867340000	879400000	629530000	629740000	537000000	529750000	560960000	536350000	568100000	553510000	513780000	637660000
B2R5U3	EHD1	EH domain-containing protein 1	34	12396000000	525	552450000	535830000	518050000	533620000	543810000	574070000	559400000	625890000	504400000	565090000	924350000	851610000	928510000	881890000	905240000	803440000	819980000	719010000	880310000	770310000
A0A024RB14	RPS26	40S ribosomal protein S26	3	12311000000	147	712070000	559260000	625470000	616620000	585650000	494330000	689270000	0	659110000	601760000	898940000	705860000	613820000	653840000	464100000	700000000	526440000	546610000	646420000	812750000
Q14240	EIF4A2	Eukaryotic initiation factor 4A-II	26	12221000000	252	717580000	810270000	722120000	670020000	722660000	571660000	560750000	654220000	552320000	638750000	666680000	662430000	524320000	669860000	543980000	652480000	709970000	835570000	683900000	718670000
A0A140VJK6	GMPS	GMP synthase [glutamine-hydrolyzing]	32	12170000000	461	563330000	610070000	600120000	588530000	584330000	631260000	613520000	595640000	570740000	661940000	773300000	705010000	814050000	708480000	797330000	937110000	839420000	633960000	626120000	930780000
Q69YG1	DKFZp761E1322	Myotrophin	6	12097000000	158	506540000	457320000	526110000	492180000	534890000	556920000	615960000	726400000	565630000	709080000	859280000	769860000	733480000	706960000	761630000	766450000	849700000	919450000	953280000	699820000
A0A1U9X9C8	VARS	Valine--tRNA ligase	44	12089000000	623	731640000	765180000	733190000	774880000	809000000	620970000	628210000	584750000	557400000	625200000	630950000	639240000	560530000	605730000	610680000	656720000	654110000	614420000	646910000	656710000
E9PKH8	MS4A1	B-lymphocyte antigen CD20	10	12037000000	218	341270000	289950000	325140000	371060000	390950000	407570000	204170000	163610000	201820000	150960000	1220300000	1102500000	1001600000	969710000	983160000	1317200000	1169700000	1056800000	934500000	1437800000
A0A024R326	RPL29	60S ribosomal protein L29	1	12009000000	60	0	0	0	0	0	0	0	0	0	0	0	541450000	474170000	0	0	0	317940000	0	0	0
Q6IB71	PSMA3	Proteasome subunit alpha type	10	11981000000	259	505440000	462020000	434390000	509990000	464830000	806090000	848450000	884010000	745940000	827820000	768380000	769330000	767540000	730620000	649000000	687390000	698610000	574760000	686040000	666910000
H0YMF4	RPL28	60S ribosomal protein L28	4	11979000000	99	658730000	724670000	546190000	734050000	683100000	803810000	647740000	802840000	698550000	667460000	540470000	769450000	536990000	0	600000000	492360000	482990000	543850000	571030000	696970000
A0A140VK27	LTA4H	Leukotriene A-4 hydrolase	27	11935000000	490	636430000	616170000	647480000	607270000	645370000	700960000	751890000	780040000	688750000	726360000	667860000	640880000	677200000	697010000	658350000	633870000	596070000	658470000	750120000	577790000
A0A024R718	PBEF1	Nicotinamide phosphoribosyltransferase	25	11898000000	362	507340000	517370000	530580000	568620000	562880000	574200000	549020000	579320000	460470000	558610000	722440000	820710000	889620000	856550000	942950000	745230000	836300000	748030000	763770000	720220000
A0A024R5Z9	PKM2	Pyruvate kinase	42	11880000000	207	792140000	779050000	791880000	819660000	869910000	879340000	1022200000	1009900000	664140000	920400000	461230000	378150000	261410000	484710000	307580000	222950000	371450000	329880000	453780000	351970000
A0A384N605	GRHPR	Glyoxylate reductase/hydroxypyruvate reductase	15	11870000000	250	713720000	703740000	749220000	719570000	738760000	475330000	603100000	549690000	617390000	560420000	763780000	639430000	727260000	668560000	790970000	535550000	579240000	714200000	696760000	492110000
P17812	CTPS1	CTP synthase 1	25	11837000000	425	864820000	923790000	913040000	881330000	861240000	847590000	745920000	762220000	794070000	825160000	373840000	432230000	364800000	410000000	372860000	435220000	452940000	347010000	366470000	448240000
O75947	ATP5H	ATP synthase subunit d, mitochondrial	12	11763000000	298	696550000	655470000	692300000	626500000	600810000	621220000	606500000	570320000	658010000	550390000	683670000	548490000	723390000	643900000	730730000	540050000	508680000	871640000	642640000	628690000
P07741	APRT	Adenine phosphoribosyltransferase	8	11713000000	241	846080000	793650000	867390000	804070000	850050000	741970000	817040000	786520000	847700000	806420000	462450000	451470000	422820000	402930000	457230000	443490000	464630000	581940000	616050000	368780000
Q4KMR3	MYO1E	Unconventional myosin-Ie	38	11706000000	582	857730000	888050000	914420000	871090000	955310000	951720000	951970000	1019900000	906460000	954450000	368350000	366180000	315790000	368860000	338020000	317010000	301420000	333410000	291250000	350180000
P46783	RPS10	40S ribosomal protein S10	7	11598000000	291	482480000	542580000	483280000	562650000	493210000	532910000	538620000	509480000	475640000	534370000	699930000	700630000	759720000	652870000	755830000	706810000	857290000	616850000	680330000	874340000
O00429	DNM1L	Dynamin-1-like protein	37	11595000000	585	503340000	502940000	501440000	488550000	528270000	460430000	514410000	512880000	454580000	546560000	1001100000	938450000	952950000	982910000	977850000	694530000	709060000	649510000	643970000	617650000
A0A024R040	OXCT1	Succinyl-CoA:3-ketoacid-coenzyme A transferase	15	11584000000	309	582710000	611240000	580020000	592060000	638150000	563190000	476380000	695280000	631650000	484630000	658970000	673400000	713890000	725300000	662160000	701700000	676180000	755890000	820340000	706240000
A0A024QZP7	CDC2	Cyclin-dependent kinase 1	17	11531000000	266	930050000	1033900000	1011400000	981480000	1005900000	1040700000	696610000	470300000	887460000	731180000	288800000	359180000	237660000	267370000	218640000	482270000	495840000	159630000	179180000	656490000
A0A384NPH0	LMNB2	Lamin-B2	31	11476000000	403	601840000	563950000	576770000	567140000	594390000	523360000	437340000	513640000	466050000	535660000	653490000	687770000	750620000	734780000	693060000	722070000	749350000	762930000	877900000	721410000
A0A024R7E3	DNMT1	DNA (cytosine-5)-methyltransferase	50	11470000000	624	653010000	662890000	617750000	665040000	671060000	618280000	542880000	433730000	558650000	574650000	732340000	819980000	692420000	744340000	654620000	735290000	733830000	415860000	408750000	810680000
V9HW51	HEL-S-114	Thioredoxin-like protein 1	14	11421000000	254	625410000	663290000	603680000	651770000	620900000	559970000	458990000	473140000	468880000	469970000	829890000	820500000	785610000	770610000	707920000	609360000	619750000	564430000	679810000	819230000
Q6FHX6	FEN1	Flap endonuclease 1	14	11402000000	247	748630000	782050000	705110000	732600000	699810000	587500000	651780000	548750000	601770000	618260000	610500000	547330000	506840000	533030000	520700000	683100000	637330000	475690000	542940000	693390000
Q5T6U8	HMGA1		3	11394000000	31	0	0	0	0	0	0	0	0	0	0	0	0	0	0	0	0	0	0	0	761150000
Q9UK76	HN1	Hematological and neurological expressed 1 protein	7	11365000000	293	506510000	557910000	514740000	481300000	537490000	625450000	809470000	671720000	697610000	839160000	470980000	342010000	463680000	462270000	481050000	543200000	466510000	401130000	448040000	427510000
A0A024R7L5	UPF1	Regulator of nonsense transcripts 1	47	11347000000	675	701170000	710450000	706810000	725090000	711370000	724560000	758630000	660440000	785680000	763280000	546560000	516080000	474020000	462050000	488280000	580640000	604950000	450940000	461630000	620110000
B2R6F3	SFRS3	Serine/arginine-rich splicing factor 3	5	11274000000	110	742310000	691560000	711900000	710160000	653590000	616370000	738210000	707980000	756890000	652400000	599840000	701190000	534090000	493510000	469940000	0	559290000	584600000	539940000	548900000
A0A024R1K7	YWHAH	14-3-3 protein eta	17	11221000000	233	585970000	625950000	532700000	596440000	622440000	546740000	499860000	549120000	498280000	558750000	602880000	621680000	611780000	625040000	657960000	839350000	698270000	593830000	794510000	833120000
A0A140VJZ4	UCHL3	Ubiquitin carboxyl-terminal hydrolase isozyme L3	16	11201000000	267	562110000	568770000	500300000	554670000	604940000	498260000	509680000	592960000	508620000	613600000	901220000	833110000	835100000	824480000	853130000	548100000	602510000	522050000	524130000	528330000
A0A384MDR8	PDHB	Pyruvate dehydrogenase E1 component subunit beta, mitochondrial	14	11198000000	309	644240000	733300000	735750000	739390000	724200000	553690000	636000000	757380000	666200000	552150000	631420000	623080000	630890000	670490000	586250000	435540000	490430000	581920000	587160000	422980000
A0A1U9X609	ABCF1	ATP-binding cassette sub-family F member 1	31	11162000000	501	668440000	773510000	679080000	743190000	703020000	872460000	743670000	767390000	678010000	771890000	445580000	444160000	415230000	459310000	420850000	425910000	381530000	453320000	450260000	438470000
P20674	COX5A	Cytochrome c oxidase subunit 5A, mitochondrial	8	11161000000	186	802070000	857470000	775850000	797520000	841340000	852500000	636650000	739910000	795150000	596060000	526810000	456370000	532230000	474850000	503330000	424130000	418380000	361320000	323190000	411930000
P14324	FDPS	Farnesyl pyrophosphate synthase	10	11143000000	186	668360000	601520000	704940000	641930000	724380000	722240000	662370000	750850000	531110000	695620000	709200000	631050000	583420000	684120000	638370000	415600000	524440000	462960000	525240000	508300000
Q53FJ5	PSAP	Prosaposin	14	11084000000	151	911050000	588370000	883800000	896470000	724450000	681650000	723890000	694440000	752360000	853190000	315740000	349570000	388310000	379160000	386030000	494780000	385010000	621600000	682350000	442080000
Q9Y2Z0	SUGT1	Suppressor of G2 allele of SKP1 homolog	23	11066000000	365	601720000	619840000	556790000	611000000	625090000	732080000	632140000	568930000	578750000	791700000	621040000	636630000	621420000	645110000	635520000	612450000	560300000	521430000	473910000	609550000
A0A3B3ITZ9	THRAP3	Thyroid hormone receptor-associated protein 3	22	10892000000	369	682790000	682790000	630300000	724240000	673530000	599040000	684280000	642640000	613400000	734320000	482960000	503430000	601720000	564720000	480330000	639000000	616700000	465740000	514930000	557300000
Q8WU39	MZB1	Marginal zone B- and B1-cell-specific protein	8	10865000000	235	476390000	485820000	499310000	533520000	484220000	465890000	510940000	499800000	490270000	544700000	900360000	737190000	827530000	776530000	814520000	577270000	597810000	660480000	760860000	525370000
A8K492	MARS	Methionine--tRNA ligase, cytoplasmic	33	10855000000	497	563730000	625170000	620170000	611520000	630310000	452110000	510020000	530610000	494630000	542710000	661690000	599240000	650320000	623490000	685090000	688370000	647190000	724230000	721270000	708180000
Q8N1F7	NUP93	Nuclear pore complex protein Nup93	39	10843000000	544	548860000	596240000	553230000	547350000	563630000	599590000	567830000	594350000	606750000	594780000	608780000	683560000	670790000	641100000	612320000	639130000	658920000	587570000	550580000	733100000
P17858	PFKL	ATP-dependent 6-phosphofructokinase, liver type	25	10822000000	320	700750000	705880000	686520000	695870000	729030000	830210000	710330000	877680000	610270000	799770000	388510000	380470000	353360000	368470000	377740000	446670000	481830000	556720000	603790000	296590000
Q9NXW1			10	10772000000	96	963630000	929210000	803240000	933160000	996440000	923100000	853990000	899250000	598290000	954550000	228320000	310000000	255450000	325790000	274610000	183750000	295570000	289320000	229650000	297400000
P49792	RANBP2	E3 SUMO-protein ligase RanBP2	73	10720000000	786	528430000	502660000	512150000	493310000	540990000	598060000	582550000	557260000	565710000	638500000	714490000	719060000	730400000	748250000	659510000	631110000	606740000	569900000	573530000	621060000
Q12912	LRMP	Lymphoid-restricted membrane protein	29	10680000000	419	499100000	400150000	521660000	485360000	498960000	452620000	458020000	474870000	451110000	326170000	715240000	728170000	878970000	870020000	760710000	720070000	640210000	790860000	745060000	825120000
Q9UJU6	DBNL	Drebrin-like protein	15	10668000000	287	510210000	502520000	452470000	458980000	492860000	502320000	465230000	431090000	443670000	493050000	895490000	779890000	705330000	749790000	772690000	649390000	716980000	641300000	771230000	668110000
Q99460	PSMD1	26S proteasome non-ATPase regulatory subunit 1	30	10595000000	451	526300000	553120000	549620000	562270000	565730000	588070000	616680000	555740000	601000000	616660000	673530000	559510000	634520000	596400000	653190000	561960000	545520000	585970000	572560000	553680000
P62314	SNRPD1	Small nuclear ribonucleoprotein Sm D1	4	10580000000	101	453930000	426610000	481570000	275360000	440340000	543730000	442020000	452310000	668230000	536030000	700050000	598590000	668230000	493010000	763600000	867960000	785190000	816430000	808220000	817350000
P07384	CAPN1	Calpain-1 catalytic subunit	34	10576000000	473	550410000	543920000	551400000	598190000	598410000	529570000	522870000	631530000	530300000	561730000	594730000	621660000	610560000	671990000	626090000	563760000	603320000	651940000	721800000	531220000
P62273	RPS29	40S ribosomal protein S29	4	10545000000	147	178680000	123880000	234500000	234320000	219730000	215640000	451870000	184180000	470100000	337770000	824760000	2239700000	476160000	603810000	434290000	519070000	429850000	1265200000	446660000	790440000
P12081	HARS	Histidine--tRNA ligase, cytoplasmic	24	10519000000	322	771560000	792310000	773710000	780630000	785030000	750120000	675740000	683130000	600830000	715490000	430340000	506300000	437030000	509640000	445350000	398840000	399080000	299770000	403080000	369020000
D3DVA5	ARHGEF2	Rho guanine nucleotide exchange factor 2	31	10504000000	463	637910000	739370000	730560000	674730000	736380000	671490000	711020000	710440000	678540000	736710000	471420000	453380000	455650000	474140000	495900000	423990000	416940000	387450000	336680000	441960000
Q15149	PLEC	Plectin	155	10483000000	1069	19522000	76096000	34508000	33224000	72176000	32690000	27879000	0	38257000	7935700	1329700000	1497500000	1185300000	1441100000	1283100000	1108900000	1021600000	1103900000	1097200000	999400000
B2R858	DDX6	Probable ATP-dependent RNA helicase DDX6	20	10481000000	363	593470000	605730000	568590000	592320000	607010000	573230000	630600000	645220000	597310000	602390000	534080000	566120000	550420000	570610000	587760000	470720000	466240000	431380000	463490000	483320000
F5CTF3	DCK	Deoxycytidine kinase	11	10466000000	292	590770000	519070000	625860000	582300000	606740000	517800000	618240000	636960000	646320000	677860000	591070000	542420000	498140000	554120000	586640000	557250000	560160000	519660000	608650000	464300000
Q10567	AP1B1	AP-1 complex subunit beta-1	34	10449000000	412	614980000	590860000	551310000	568310000	615520000	610870000	617430000	576730000	506820000	677960000	597980000	567170000	575960000	587230000	606250000	615560000	535010000	537830000	583640000	535150000
B4DUD6	2022-09-07	Septin-7	15	10429000000	289	327420000	353300000	280700000	317650000	330110000	465430000	433930000	466920000	400400000	479480000	621220000	581440000	605380000	599510000	611900000	625700000	707300000	667270000	811270000	633220000
Q07021	C1QBP	Complement component 1 Q subcomponent-binding protein, mitochondrial	11	10409000000	265	283900000	333330000	316820000	331650000	281240000	234490000	257610000	235820000	278470000	202930000	654690000	525630000	953830000	909570000	1042100000	982090000	1021500000	1213800000	1020900000	978790000
A0A024R2U9	APEH	Acylamino-acid-releasing enzyme	19	10407000000	303	922770000	908340000	915710000	846210000	919550000	730350000	732350000	759540000	684270000	809810000	293550000	281620000	282510000	286650000	250040000	316940000	326830000	243040000	298490000	304770000
P08575	PTPRC	Receptor-type tyrosine-protein phosphatase C	34	10397000000	494	993240000	780230000	993890000	957640000	1055000000	1006900000	850830000	1013000000	930030000	621290000	181980000	207030000	235850000	213980000	192180000	112910000	126630000	338140000	0	325010000
Q53H22	PPAT	Amidophosphoribosyltransferase	19	10326000000	332	606030000	626220000	632820000	621100000	675340000	683520000	673490000	689390000	581520000	657860000	441800000	503760000	433410000	446820000	447710000	551650000	561390000	528530000	576010000	548740000
A0A087X2I1	PSMC6	26S protease regulatory subunit 10B	20	10246000000	358	593770000	625300000	576540000	613320000	607460000	622180000	627440000	632360000	655440000	661310000	604120000	567830000	531120000	497160000	542610000	498090000	492640000	492950000	510600000	481230000
A0A384MDK7	PCMT1	Protein-L-isoaspartate O-methyltransferase	13	10215000000	243	301690000	275650000	309700000	260000000	340370000	735840000	778170000	734330000	681850000	731750000	552120000	528290000	467920000	603430000	579830000	645510000	614580000	621640000	785570000	574540000
A0A140VJP5	MAT2A	S-adenosylmethionine synthase isoform type-2	13	10205000000	249	807920000	770250000	694230000	698190000	763270000	766070000	604080000	546820000	692170000	699550000	352390000	452240000	452860000	379760000	397870000	465780000	494120000	399990000	339620000	482530000
A0A0S2Z3L2	ATP2A2	Sarcoplasmic/endoplasmic reticulum calcium ATPase 2	30	10192000000	324	641800000	534760000	699610000	667940000	638220000	716750000	573630000	676320000	661750000	453840000	443620000	458270000	549870000	554210000	567600000	471070000	432240000	674970000	481990000	564140000
R4GNH3	PSMC3		19	10164000000	356	613760000	624650000	620690000	611720000	568370000	563360000	622340000	574860000	583710000	609010000	534510000	515810000	517890000	557010000	585710000	494370000	468070000	521130000	534130000	472430000
Q53FE8	NSFL1C		18	10135000000	374	590320000	617230000	587530000	600010000	622190000	687300000	623600000	654350000	609600000	654240000	577340000	548960000	508190000	570480000	520150000	431730000	437640000	397130000	491660000	444860000
J3QT28	BUB3	Mitotic checkpoint protein BUB3	11	10101000000	201	642980000	759670000	627380000	681070000	646920000	729100000	586090000	629200000	581920000	616970000	439870000	482250000	452040000	450170000	399620000	477470000	499980000	407130000	393720000	576350000
B7Z4B2	NPEPPS	Puromycin-sensitive aminopeptidase	31	10094000000	411	656670000	658860000	642400000	661920000	717930000	633190000	604380000	636860000	567820000	624310000	454210000	476090000	484120000	487510000	462220000	501520000	485560000	457650000	457420000	466520000
P29144	TPP2	Tripeptidyl-peptidase 2	49	10090000000	581	214480000	198690000	198320000	194970000	185680000	197670000	203160000	218040000	83398000	185730000	1240900000	1097600000	1150800000	1063900000	1304500000	928760000	765560000	590440000	802650000	754780000
A0A087X1K9	LYPLA1	Acyl-protein thioesterase 1	8	10045000000	178	423260000	465400000	425700000	464320000	459890000	418010000	428760000	512770000	434210000	431390000	733690000	789550000	712800000	669170000	699650000	568090000	658750000	706640000	823340000	615310000
Q6ICQ8	ARHG	Rho-related GTP-binding protein RhoG	11	10039000000	159	279170000	275460000	337860000	0	285430000	668730000	731170000	723690000	604300000	636010000	406710000	505030000	558960000	540410000	546810000	657420000	602680000	862390000	828300000	811360000
Q9UBT2	UBA2	SUMO-activating enzyme subunit 2	25	10035000000	440	632720000	642980000	646970000	685330000	684480000	673860000	687950000	715710000	705180000	708690000	358390000	318500000	381900000	345350000	359080000	506780000	492700000	479550000	508620000	416250000
A0A024R9Y3	HUWE1	E3 ubiquitin-protein ligase HUWE1	99	10031000000	933	592640000	608650000	626830000	605730000	664970000	575030000	623550000	602990000	573280000	655960000	518390000	529910000	522150000	517150000	517120000	486020000	492480000	452490000	497440000	458050000
A0A384NL93	COX5B	Cytochrome c oxidase subunit 5B, mitochondrial	8	10009000000	129	770620000	788510000	740670000	757430000	822530000	716660000	564330000	689030000	627430000	577560000	383060000	455220000	531790000	525420000	500570000	296090000	287060000	308900000	306960000	402710000
A0A024RB87	RAP1B	Ras-related protein Rap-1b	12	9990000000	204	384330000	393920000	318110000	387780000	366650000	516300000	428800000	455220000	415050000	290040000	572620000	678430000	676180000	752370000	647890000	798060000	753380000	938560000	737500000	1022800000
B2RDE8	HDGF	Hepatoma-derived growth factor	17	9969800000	325	405070000	388910000	400720000	383120000	404430000	471130000	488620000	443120000	412000000	546790000	552620000	536340000	670710000	601410000	748730000	757600000	802560000	686830000	812830000	635760000
P35606	COPB2	Coatomer subunit beta	30	9962400000	426	532400000	576870000	539580000	527800000	583330000	615740000	552700000	595730000	528920000	573060000	581600000	588490000	529880000	582200000	515520000	522200000	522310000	612950000	529720000	499470000
O75475	PSIP1	PC4 and SFRS1-interacting protein	19	9955900000	363	484850000	502390000	460140000	477230000	533840000	659530000	687030000	689240000	583130000	676380000	543760000	536330000	510360000	552300000	487870000	583990000	551290000	436350000	587830000	517770000
A0A2X0SFD3	DOCK2	Dedicator of cytokinesis protein 2	55	9930600000	564	380160000	332810000	407630000	306170000	255610000	483750000	506660000	598980000	514770000	506550000	634900000	608280000	564740000	608340000	654580000	863700000	764750000	716260000	962950000	705650000
Q6IB54	ATP5J	ATP synthase-coupling factor 6, mitochondrial	7	9906400000	166	589770000	534260000	536130000	509720000	583550000	455660000	430260000	533470000	524790000	478650000	648450000	616240000	629880000	609150000	584500000	584280000	485150000	645050000	622730000	560870000
A0A024RAM0	TNPO1	Transportin-1	26	9901200000	403	518790000	558880000	588910000	572430000	577160000	607990000	599810000	543000000	680100000	626200000	563260000	517090000	509560000	501600000	553840000	530110000	473890000	486270000	489990000	503510000
Q9Y383	LUC7L2	Putative RNA-binding protein Luc7-like 2	12	9880200000	346	456500000	436850000	442670000	393560000	488660000	510310000	503810000	567430000	552920000	607760000	475680000	428960000	396150000	406400000	416120000	505560000	568300000	381920000	456390000	564160000
P27694	RPA1	Replication protein A 70 kDa DNA-binding subunit	25	9871000000	428	446320000	454980000	488320000	447500000	494120000	602190000	599860000	627900000	577460000	648230000	462080000	496000000	517320000	524510000	525130000	588960000	650120000	575320000	656380000	646320000
I1SRC5	KRAS	GTPase KRas	11	9826000000	235	490670000	569550000	514920000	506560000	536200000	636620000	510970000	618470000	559150000	503300000	434680000	452950000	412320000	375730000	450700000	477520000	439250000	427690000	477100000	445890000
Q15008	PSMD6	26S proteasome non-ATPase regulatory subunit 6	23	9792500000	418	533740000	541020000	589020000	538780000	624330000	595860000	534280000	528230000	534800000	538260000	497460000	537650000	556510000	597790000	561780000	486770000	573300000	581490000	537460000	500050000
Q14444	CAPRIN1	Caprin-1	11	9774100000	213	768690000	927210000	845110000	770160000	811500000	652690000	561310000	437760000	601250000	592030000	348220000	432620000	359770000	431870000	374970000	466850000	428900000	215020000	136950000	500940000
O95373	IPO7	Importin-7	30	9758500000	454	439590000	434520000	438130000	448700000	388370000	631180000	666490000	583460000	640810000	630890000	608680000	544400000	626560000	514620000	601680000	511900000	439340000	437830000	381160000	459810000
E7ETK0	RPS24	40S ribosomal protein S24	6	9750200000	242	518800000	590770000	528940000	543950000	565270000	499570000	607630000	443960000	470240000	568410000	659440000	493180000	517500000	510990000	587050000	524320000	496700000	478120000	477550000	582850000
P12270	TPR	Nucleoprotein TPR	64	9726700000	614	531770000	536930000	541670000	506890000	585990000	644130000	608120000	654370000	590420000	704830000	507650000	496380000	545640000	503690000	444310000	564210000	516450000	435780000	495120000	502320000
Q6IBR8	EIF2S2	Eukaryotic translation initiation factor 2 subunit 2	19	9714400000	283	599840000	634910000	587720000	598890000	597750000	559810000	548600000	523520000	511260000	535000000	435760000	532930000	543020000	577150000	584130000	542040000	570730000	505080000	455840000	494580000
Q5T081	RCC1	Regulator of chromosome condensation	15	9631000000	271	348480000	365800000	375270000	348270000	346770000	589680000	617460000	620830000	610270000	634300000	472790000	521200000	525330000	554810000	538380000	626810000	629220000	535740000	607070000	617290000
Q08ET0	hCG_39985	ATP synthase F(0) complex subunit B1, mitochondrial	10	9623800000	180	491780000	465380000	490140000	415180000	440280000	404670000	416950000	530100000	426330000	372490000	489160000	509070000	823880000	700080000	723090000	643510000	516320000	852710000	548030000	556000000
Q9H0A0	NAT10	N-acetyltransferase 10	40	9610700000	469	564780000	567250000	597430000	613560000	607430000	512330000	452190000	464580000	535430000	483550000	476420000	499420000	559200000	514200000	523160000	559220000	542640000	547920000	489420000	590030000
Q15907	RAB11B	Ras-related protein Rab-11B	12	9582800000	197	485130000	463030000	515180000	508490000	476500000	484680000	411390000	438870000	445100000	329970000	441000000	537380000	597400000	579240000	610870000	679420000	631960000	635360000	716300000	643450000
A0A024RCC9	NAP1L4	Nucleosome assembly protein 1-like 4	16	9582000000	234	288250000	291160000	263290000	286840000	258270000	674760000	794460000	684080000	681680000	793030000	619840000	582140000	511670000	579740000	563060000	617780000	626950000	551310000	609930000	573830000
F8WCF6	ARPC4-TTLL3	Actin-related protein 2/3 complex subunit 4	6	9515900000	94	434650000	450040000	438110000	438430000	488470000	460160000	442850000	441820000	392130000	462600000	573190000	732860000	633340000	697300000	675460000	677720000	604740000	644880000	618560000	680200000
B4DFL1	DLD	Dihydrolipoyl dehydrogenase	14	9511900000	258	418240000	411150000	370510000	365430000	375560000	292930000	300800000	391320000	428640000	297000000	790170000	749980000	881440000	777810000	793020000	543500000	531970000	629870000	672370000	545260000
Q5SSJ5	HP1BP3	Heterochromatin protein 1-binding protein 3	21	9510800000	320	285930000	275110000	285250000	311210000	327040000	535930000	469420000	654300000	468660000	578550000	538810000	559290000	624300000	597800000	553880000	706590000	681770000	767140000	905700000	626860000
Q6FIC5	CLIC4	Chloride intracellular channel protein	19	9497800000	286	423320000	364820000	416960000	377860000	408390000	238480000	269130000	211430000	222210000	257090000	1205600000	951670000	1009000000	1043500000	1131100000	481090000	413900000	487170000	502330000	364530000
Q93009	USP7	Ubiquitin carboxyl-terminal hydrolase 7	44	9494500000	566	600850000	532780000	621020000	581340000	627240000	782270000	860260000	793300000	738320000	777740000	447020000	398820000	448830000	392640000	421390000	246390000	260350000	259530000	241490000	202500000
O15371	EIF3D	Eukaryotic translation initiation factor 3 subunit D	21	9493200000	421	519830000	514630000	490490000	505300000	459730000	470340000	507010000	423870000	497630000	478040000	642670000	541240000	561480000	540200000	609430000	555940000	555840000	633010000	554570000	553580000
B2R802	SNRPA	U1 small nuclear ribonucleoprotein A	8	9461800000	233	519910000	501180000	466050000	557350000	523250000	649190000	470530000	526850000	506110000	505420000	447340000	455020000	545870000	569540000	523550000	571640000	579240000	423400000	437240000	592200000
A8K4T9	RALY	RNA-binding protein Raly	10	9455400000	185	550500000	523720000	516220000	550540000	594060000	689650000	649910000	757780000	714570000	829910000	327680000	426230000	380140000	373610000	338580000	442190000	455700000	413370000	493750000	437930000
P53618	COPB1	Coatomer subunit beta	30	9406600000	492	498940000	505640000	539220000	490900000	515920000	468940000	636700000	541110000	603050000	561330000	526500000	490140000	530650000	509600000	530260000	524420000	497110000	537510000	539640000	484870000
B2R6U8	NUDT21	Cleavage and polyadenylation specificity factor subunit 5	11	9386800000	215	525220000	564980000	483780000	436900000	519570000	590810000	544310000	574620000	536760000	703680000	500110000	462210000	477720000	434860000	447310000	579750000	558940000	392260000	485640000	492470000
B4E2S3	RFTN1	Raftlin	20	9386100000	363	534790000	519830000	464120000	538010000	535200000	526390000	416370000	513970000	516950000	359110000	660420000	565270000	524600000	531550000	532530000	530560000	484880000	460030000	487250000	663020000
P43246	MSH2	DNA mismatch repair protein Msh2	30	9325600000	429	606450000	670850000	676930000	623800000	651500000	681720000	572330000	484040000	583010000	614630000	397410000	408490000	397220000	393010000	387890000	517700000	513170000	173030000	323870000	565200000
Q6IRT1	ADH5	S-(hydroxymethyl)glutathione dehydrogenase	13	9322200000	287	607510000	604340000	579490000	637910000	601000000	606430000	616440000	652680000	562340000	603820000	369070000	372720000	361850000	395410000	355460000	444640000	491300000	502410000	469990000	430090000
P37108	SRP14	Signal recognition particle 14 kDa protein	5	9302200000	200	435580000	502630000	394540000	585760000	382890000	430030000	407150000	683740000	362810000	396300000	305360000	331030000	254770000	342280000	269610000	255230000	325890000	334260000	329070000	438370000
O75821	EIF3G	Eukaryotic translation initiation factor 3 subunit G	15	9282100000	260	497250000	493720000	459210000	480010000	478830000	420570000	450760000	331650000	377780000	486390000	567620000	580670000	562920000	660970000	654740000	635340000	598580000	497430000	432830000	654310000
CON__P35527	KRT9	Keratin, type I cytoskeletal 9	24	9242300000	244	452910000	71995000	565640000	725670000	891760000	548990000	543480000	359270000	363040000	411560000	536560000	878130000	846130000	325240000	547800000	455870000	530260000	404540000	245710000	569020000
E9PR30	FAU	40S ribosomal protein S30	3	9200700000	72	540270000	486880000	519020000	519770000	532340000	412990000	474360000	490840000	513750000	599850000	575740000	599460000	504280000	478790000	567600000	550100000	548210000	446090000	391050000	627960000
P35659	DEK	Protein DEK	13	9194600000	241	342140000	309920000	309980000	343730000	376200000	462420000	438800000	504340000	423270000	497510000	527070000	533240000	620250000	648500000	520300000	808030000	896030000	617430000	711690000	714730000
E7EVJ5	CYFIP2	Cytoplasmic FMR1-interacting protein 2	46	9182800000	609	326220000	380180000	326510000	249310000	340780000	422060000	389690000	389020000	365100000	421280000	553690000	551150000	602890000	621430000	637700000	642780000	608610000	689800000	731540000	662940000
P26368	U2AF2	Splicing factor U2AF 65 kDa subunit	14	9178700000	332	443850000	466450000	479060000	474850000	439640000	414320000	547390000	523050000	464930000	551340000	473930000	425540000	578020000	484470000	572860000	608330000	627750000	542020000	547580000	538440000
Q86VX4	SMC3	Structural maintenance of chromosomes protein	45	9173800000	535	435920000	457510000	453500000	438430000	496700000	606790000	579680000	617300000	534470000	643380000	441650000	417730000	445880000	426230000	431360000	596880000	599190000	501460000	569990000	605600000
Q8WXF1	PSPC1	Paraspeckle component 1	17	9166300000	392	485270000	466620000	467500000	481470000	505700000	331400000	332880000	356330000	350540000	380330000	597250000	574120000	678440000	622550000	630830000	548880000	610230000	668640000	604070000	594850000
B3KTJ9	CCAR2	Cell cycle and apoptosis regulator protein 2	32	9117600000	436	363390000	348410000	361470000	342240000	365710000	316420000	334840000	334650000	319350000	366260000	705310000	675960000	660690000	689950000	691240000	713120000	689370000	717000000	750370000	665930000
A0A140VKE1	UGP2		20	9096900000	302	248970000	266240000	253760000	242660000	268820000	408240000	355790000	434050000	331540000	413960000	709060000	825710000	706560000	757280000	695680000	622240000	804450000	653630000	791030000	598360000
G3V1C3	API5	Apoptosis inhibitor 5	18	9088200000	268	525150000	545810000	578290000	542320000	558280000	528890000	509890000	512860000	489850000	582070000	427890000	449460000	505640000	504530000	464730000	533010000	521480000	414480000	441540000	591290000
P54727	RAD23B	UV excision repair protein RAD23 homolog B	13	9080200000	293	424380000	457070000	466160000	431130000	481360000	478900000	491810000	451270000	424510000	498290000	575330000	465850000	553210000	539800000	639840000	518780000	506850000	366990000	501440000	503800000
E5RHG8	TCEB1	Transcription elongation factor B polypeptide 1	6	9060300000	153	550790000	620340000	598030000	568810000	575970000	503470000	573490000	582690000	580020000	611490000	467660000	508210000	420950000	426670000	445830000	404600000	438980000	347340000	406470000	412230000
O14744	PRMT5	Protein arginine N-methyltransferase 5	21	9056400000	328	652930000	638910000	583970000	646310000	671850000	639540000	585640000	557030000	576380000	607930000	402330000	408890000	369170000	449790000	368060000	340880000	345350000	352560000	384370000	358480000
A0A024R5M9	NUMA1		62	9027900000	706	531520000	559540000	575610000	587260000	643410000	598980000	579780000	682150000	540660000	669580000	314980000	351880000	367210000	360960000	331180000	373800000	373030000	319830000	399230000	375120000
Q6IT96	HDAC1	Histone deacetylase	15	9024200000	336	389800000	376960000	380090000	371880000	393030000	411010000	484510000	441200000	466290000	491390000	581460000	523550000	562890000	508640000	556740000	601170000	559050000	587310000	538710000	564740000
A0A024R201	PSMD13		20	9019700000	354	535110000	486610000	551240000	551810000	545040000	496020000	490120000	500980000	518220000	475390000	511640000	500550000	495370000	492940000	521610000	497110000	481390000	485730000	484440000	450600000
Q541S4	2022-09-06	Septin-6	19	8986400000	302	336530000	341960000	328330000	299650000	385570000	490560000	566360000	549810000	487740000	603610000	535360000	517710000	552910000	681220000	597570000	572210000	601360000	672960000	712160000	487220000
B2RNR6	ZFR	Zinc finger RNA-binding protein	22	8984800000	289	505270000	537040000	490760000	542400000	569150000	644500000	479120000	586730000	517820000	503000000	381350000	364390000	393720000	373770000	329740000	363930000	451330000	338780000	445330000	388010000
Q9GZT3	SLIRP	SRA stem-loop-interacting RNA-binding protein, mitochondrial	9	8977600000	264	630630000	606730000	576540000	586700000	665730000	492340000	445230000	603890000	548260000	500620000	495000000	487940000	309600000	352360000	362670000	332000000	355190000	273770000	355530000	465160000
Q86V81	ALYREF	THO complex subunit 4	9	8964600000	256	445790000	435970000	450800000	420650000	440830000	441660000	440650000	432950000	401350000	461700000	438400000	474560000	644690000	530760000	638440000	675510000	699060000	521370000	518840000	577280000
H3BR35	GSPT1	Eukaryotic peptide chain release factor GTP-binding subunit ERF3A	19	8943800000	317	504440000	506740000	454050000	554230000	500680000	551350000	505070000	525120000	446920000	521020000	581150000	543450000	477120000	426710000	510700000	513620000	487860000	405520000	418060000	512160000
B3KUN1	PPP2CA	Serine/threonine-protein phosphatase	12	8940100000	254	472190000	470830000	493490000	487560000	494150000	367880000	435260000	420090000	421630000	469130000	626270000	512010000	532070000	568960000	574050000	563080000	570760000	462540000	546740000	510930000
C9J0K6	SRI	Sorcin	12	8899900000	187	322470000	353870000	347420000	383620000	345960000	347660000	301400000	359570000	279210000	336800000	692040000	653480000	631590000	673970000	618410000	712090000	661570000	760770000	808330000	625280000
P50570	DNM2	Dynamin-2	33	8898500000	380	344390000	357840000	347870000	376180000	412500000	406870000	410500000	422050000	401090000	432540000	606450000	563610000	625970000	587750000	615600000	621290000	602400000	669080000	700380000	557020000
P28074	PSMB5	Proteasome subunit beta type-5	13	8877200000	253	336710000	356380000	323800000	283520000	337610000	543290000	546170000	522290000	441930000	581570000	622590000	852250000	715690000	812190000	711690000	364670000	369170000	370230000	361480000	349250000
V9HW48	HEL-S-115	SH3 domain-binding glutamic acid-rich-like protein	8	8819200000	220	416340000	403460000	445310000	444740000	453440000	363750000	398680000	397490000	370930000	465040000	653560000	547440000	534520000	594530000	554080000	548640000	584310000	505160000	655830000	442930000
A0A024R0E2	CSDE1	Cold shock domain-containing protein E1	35	8803700000	475	529220000	528760000	484360000	531400000	518070000	440770000	434480000	313640000	449670000	439280000	532850000	552270000	541780000	568660000	548490000	603270000	558130000	386370000	318610000	634590000
P30049	ATP5D	ATP synthase subunit delta, mitochondrial	4	8799800000	83	353840000	390350000	319750000	0	371990000	335700000	267640000	422450000	347770000	292100000	492520000	656460000	676560000	354650000	500240000	410950000	588820000	657010000	712380000	664570000
P55265	ADAR	Double-stranded RNA-specific adenosine deaminase	38	8792300000	451	487510000	482080000	482520000	488510000	511060000	479510000	468950000	540160000	472800000	555130000	511310000	470600000	512010000	492990000	502230000	508720000	524800000	458450000	514410000	483440000
B7ZAF6	SUCLA2	Succinyl-CoA ligase subunit beta	13	8779000000	227	556590000	615190000	603960000	634000000	669940000	484370000	435850000	575660000	557260000	498500000	442590000	493760000	480070000	504070000	457540000	331740000	321960000	372190000	362070000	290340000
A0A384MR33	SMC1A	Structural maintenance of chromosomes protein 1A	49	8753300000	566	420060000	444150000	422330000	423680000	448340000	542390000	490410000	557980000	526200000	544490000	395930000	411870000	408210000	423560000	407190000	524550000	518220000	443660000	493720000	603470000
P47813	EIF1AX	Eukaryotic translation initiation factor 1A, X-chromosomal	7	8748800000	125	608790000	638710000	563200000	583200000	601200000	746870000	610370000	750830000	618390000	694550000	358050000	379880000	205510000	307080000	380100000	287230000	285260000	352320000	320300000	308990000
P68366	TUBA4A	Tubulin alpha-4A chain	23	8747700000	125	319510000	315530000	313250000	322820000	311430000	334150000	365410000	336790000	370770000	313480000	710190000	625520000	709950000	635220000	688880000	646600000	680360000	707160000	706510000	642100000
Q8N5A0	EIF5B	Eukaryotic translation initiation factor 5B	30	8741400000	405	468250000	505880000	394310000	482760000	507840000	479510000	492600000	411960000	461570000	504420000	547230000	533960000	542240000	572360000	514990000	472670000	499880000	437270000	429090000	560510000
O14929	HAT1	Histone acetyltransferase type B catalytic subunit	11	8711400000	203	531260000	566360000	565600000	531250000	555980000	519620000	538110000	387970000	531030000	541390000	491860000	469910000	467930000	417520000	448680000	454040000	462240000	222400000	253760000	472390000
A0A024R845	RAB14	Ras-related protein Rab-14	12	8646100000	255	390210000	311440000	393100000	377210000	355620000	352620000	333100000	388430000	360010000	286060000	637850000	609940000	715590000	715880000	722500000	561530000	520900000	699240000	609690000	568500000
Q9Y678	COPG1	Coatomer subunit gamma-1	37	8635400000	554	423420000	464260000	462430000	461250000	473540000	438070000	505370000	485430000	497380000	482060000	492670000	488580000	486640000	490090000	478910000	478760000	445310000	538100000	474470000	467230000
Q9Y6H1	CHCHD2	Coiled-coil-helix-coiled-coil-helix domain-containing protein 2	4	8600500000	107	471290000	523310000	538410000	518710000	530030000	545570000	523220000	559290000	564080000	543030000	338160000	321100000	352470000	327580000	329330000	544420000	507320000	502880000	501080000	590720000
Q14008	CKAP5	Cytoskeleton-associated protein 5	62	8585000000	594	529150000	593380000	574050000	552440000	566580000	606800000	539110000	461850000	526580000	524820000	406170000	401240000	366650000	376240000	378450000	500270000	447470000	367780000	367460000	501690000
Q59GW6	ACAT2	Acetyl-CoA acetyltransferase, cytosolic	15	8551000000	410	391010000	364900000	420160000	395150000	402750000	708740000	771430000	736210000	608620000	685370000	453290000	343630000	373510000	389040000	457880000	340420000	399920000	355910000	381050000	324840000
V9HWE7	HEL-S-19	Galactokinase	16	8538500000	322	585910000	602660000	590110000	602980000	608750000	544840000	536190000	696640000	603420000	655110000	270870000	320660000	299250000	340640000	294090000	278960000	307820000	426020000	384110000	213750000
B4DVJ0		Glucose-6-phosphate isomerase	22	8487500000	50	582560000	439850000	633780000	518330000	570730000	576440000	668290000	656650000	575030000	719410000	0	0	0	457090000	0	0	303810000	249620000	347610000	0
Q6IBA2	PC4	Activated RNA polymerase II transcriptional coactivator p15	6	8465800000	146	725720000	672850000	743590000	702440000	751370000	897720000	854630000	913410000	667700000	1097300000	104360000	90839000	114730000	120600000	103830000	117390000	126860000	141360000	111800000	99261000
P38606	ATP6V1A	V-type proton ATPase catalytic subunit A	28	8426300000	316	500100000	535520000	494350000	469620000	492680000	359920000	336030000	378920000	335950000	369390000	565980000	574530000	500860000	565540000	585330000	385810000	422730000	446930000	479540000	429840000
A8K8D9	G6PD	Glucose-6-phosphate 1-dehydrogenase	27	8408500000	395	526570000	545820000	553010000	533440000	596040000	530920000	576040000	519420000	487930000	569920000	355510000	359850000	353290000	364270000	330270000	407820000	413750000	423030000	428500000	424900000
A0A024R1U0	RANGAP1	Ran GTPase-activating protein 1	31	8378200000	392	542840000	588170000	512280000	564390000	471150000	500500000	419230000	336710000	466880000	487300000	432600000	445120000	489430000	441520000	427740000	506640000	436220000	351180000	315510000	522340000
P78344	EIF4G2	Eukaryotic translation initiation factor 4 gamma 2	35	8341100000	515	388190000	389300000	381690000	370340000	424140000	625350000	575420000	487120000	617920000	580760000	472170000	454010000	401600000	433950000	462550000	471920000	457020000	411770000	368710000	483810000
Q76LA1	CSTB	Cystatin-B	6	8333000000	175	517920000	364020000	415910000	482070000	406700000	294490000	332620000	413250000	322650000	379440000	348230000	350090000	514450000	530810000	619850000	522420000	525890000	807550000	742240000	538530000
V9HWG9	HEL-S-21	Glutathione S-transferase omega-1	15	8283600000	245	393870000	414590000	397280000	424760000	411910000	503200000	470540000	547610000	429440000	555580000	412980000	481430000	492690000	513920000	447810000	513490000	553010000	408820000	504160000	395530000
P63279	UBE2I	SUMO-conjugating enzyme UBC9	10	8269600000	191	530740000	578470000	531370000	492110000	534850000	518770000	571660000	534570000	452480000	582400000	372240000	345990000	349450000	377550000	337610000	467330000	515360000	318830000	384570000	426480000
O00170	AIP	AH receptor-interacting protein	17	8219700000	314	499520000	510190000	467200000	526960000	469850000	484770000	471870000	522120000	449750000	497450000	319960000	349030000	333800000	313770000	304620000	479530000	497940000	388250000	463980000	468240000
P14598	NCF1	Neutrophil cytosol factor 1	22	8205800000	317	85543000	51679000	99706000	120160000	127800000	187430000	232300000	248560000	177010000	283180000	755020000	583350000	775130000	616540000	805320000	639050000	663830000	1434600000	1210000000	537110000
Q15370	TCEB2	Transcription elongation factor B polypeptide 2	12	8199700000	197	534640000	501620000	510490000	496410000	488880000	492680000	485220000	427590000	453730000	525690000	368310000	379200000	447520000	507530000	393570000	393060000	513310000	341290000	378220000	454150000
A0A0A0N0L3	TDP43	TAR DNA-binding protein 43	11	8195000000	236	347120000	351930000	359630000	341470000	349530000	474290000	428970000	438070000	477640000	465400000	496040000	437460000	528810000	442710000	545000000	496440000	491870000	566870000	595650000	472330000
P54886	ALDH18A1	Delta-1-pyrroline-5-carboxylate synthase	27	8184400000	389	450730000	437200000	385780000	391770000	421260000	463340000	404230000	463260000	493950000	392530000	527700000	555140000	502360000	498290000	486690000	470330000	482740000	490290000	398920000	538920000
Q4VB24	HIST1H1E	Histone H1.4	9	8173900000	33	0	0	0	0	0	0	0	0	0	0	0	1488200000	0	0	0	0	0	0	0	0
A0A140VJE3	METAP2	Methionine aminopeptidase 2	20	8131800000	465	338980000	371020000	302280000	340250000	302720000	512750000	507680000	517830000	523970000	497960000	410140000	344410000	371980000	355860000	328070000	535920000	654440000	387050000	407900000	606240000
A8K3W4	HNRPUL1	Heterogeneous nuclear ribonucleoprotein U-like protein 1	21	8127500000	366	395070000	379640000	363990000	380450000	360230000	414930000	432470000	485620000	451010000	479930000	423970000	450070000	448160000	430550000	428100000	472260000	493770000	458030000	521720000	440130000
H0Y5B4	RPL36A	60S ribosomal protein L36a-like	3	8098100000	103	0	0	0	0	0	321550000	0	310020000	338660000	282000000	383230000	0	0	457450000	380200000	252310000	249130000	221320000	303200000	396940000
E7EVA0	MAP4	Microtubule-associated protein	39	8096300000	442	366340000	307460000	344910000	265160000	387710000	415750000	331010000	368190000	330210000	397920000	539100000	549370000	518500000	551640000	559260000	704360000	672070000	431680000	617450000	645530000
A8K6X3	DDX46	Probable ATP-dependent RNA helicase DDX46	34	8078800000	393	576840000	584330000	604400000	562530000	616310000	543800000	540850000	512470000	515010000	551060000	307320000	346230000	323870000	341850000	289050000	340560000	346940000	316620000	283770000	329860000
B3KMB1	SMC2L1	Structural maintenance of chromosomes protein	40	8064400000	504	462110000	520710000	434580000	476590000	469170000	601380000	456760000	431520000	500100000	474720000	396300000	409980000	453830000	424280000	363950000	488190000	503140000	211330000	283670000	526480000
Q9NR45	NANS	Sialic acid synthase	14	8033500000	245	379800000	377190000	367090000	344860000	408150000	498200000	548350000	573990000	487690000	592220000	380230000	400000000	399910000	400460000	398730000	446130000	454370000	478710000	496970000	361040000
B4DEP6	EIF4B	Eukaryotic translation initiation factor 4B	14	8004400000	160	575970000	542950000	450560000	538630000	563680000	532280000	449960000	467960000	436050000	506150000	382950000	356380000	331350000	297360000	318840000	480220000	452630000	185670000	256880000	496990000
Q9NTJ3	SMC4	Structural maintenance of chromosomes protein 4	42	7981000000	440	464170000	467670000	465230000	476520000	463450000	570990000	481710000	381950000	476810000	479150000	431340000	408030000	369800000	423710000	357580000	483840000	489440000	202120000	251210000	618860000
Q6IBR0	RPN1	Dolichyl-diphosphooligosaccharide--protein glycosyltransferase subunit 1	24	7959100000	352	427990000	355380000	427630000	380600000	406510000	406960000	386750000	393230000	424490000	265670000	373270000	435480000	501230000	465060000	456500000	509180000	431580000	732240000	560810000	614660000
Q53XL8	PSMC1	26S protease regulatory subunit 4	18	7947800000	303	448230000	479190000	503190000	431390000	464980000	459070000	448330000	424740000	473690000	458170000	447160000	504590000	480480000	464190000	432000000	434020000	405190000	369750000	386470000	434720000
B3KY12	SF3A3	Splicing factor 3A subunit 3	18	7894600000	298	466480000	490140000	476790000	488000000	467880000	498070000	462330000	442940000	440860000	515710000	353750000	387900000	430730000	424410000	364930000	415980000	439050000	382460000	408660000	425490000
A0A384MTW7	NME1	Nucleoside diphosphate kinase A	12	7874600000	191	324150000	346510000	281970000	362700000	392540000	302050000	240360000	221160000	221290000	337090000	266980000	166970000	199950000	269010000	229590000	177310000	220250000	164960000	215640000	306260000
P62306	SNRPF	Small nuclear ribonucleoprotein F	6	7840200000	99	368340000	403400000	465400000	452300000	402370000	385780000	419540000	521730000	366950000	511520000	516040000	604180000	301080000	497690000	155570000	368470000	373700000	331690000	488220000	580240000
Q96QK1	VPS35	Vacuolar protein sorting-associated protein 35	29	7821500000	370	438520000	485500000	437690000	471790000	485590000	440540000	391420000	444810000	373250000	390380000	475580000	456040000	448630000	466420000	504180000	400750000	361530000	431680000	450970000	378030000
S4R3H4	ACIN1	Apoptotic chromatin condensation inducer in the nucleus	30	7802600000	452	426270000	443710000	434950000	440780000	467200000	446850000	502300000	465350000	413800000	542980000	359640000	367080000	443810000	407830000	344260000	448040000	465970000	352680000	445710000	410720000
V9HW90	HEL-75	Glutathione reductase, mitochondrial	17	7741100000	214	250260000	233510000	280920000	148610000	239660000	257500000	252720000	180290000	225190000	331280000	652080000	547680000	471670000	504830000	594000000	778980000	737360000	681910000	790430000	480170000
P08243	ASNS	Asparagine synthetase [glutamine-hydrolyzing]	21	7720400000	302	388630000	456380000	412930000	407840000	406840000	316330000	358030000	291910000	343300000	371630000	670440000	598310000	539120000	553820000	570910000	365380000	388390000	306240000	266070000	420360000
Q6FHV6	ENO2	Gamma-enolase	18	7715400000	265	292070000	311060000	351570000	311660000	298790000	758380000	791480000	1139900000	649240000	779690000	179220000	187580000	168880000	183830000	178020000	274880000	306910000	513170000	565320000	209140000
A0A024R7V6	RAB2	Ras-related protein Rab-2A	12	7711500000	230	368840000	309890000	357570000	327860000	358260000	351740000	284570000	274880000	299940000	228920000	512560000	624700000	677140000	673750000	727690000	454710000	437110000	606580000	464950000	518510000
B4DDF4	CNN2	Calponin	14	7700500000	236	347810000	408950000	249180000	343090000	335160000	330780000	339110000	324710000	237450000	289470000	603410000	618540000	443310000	603760000	447000000	460900000	500660000	386380000	500620000	610770000
B2RAU8	NOLC1	Nucleolar and coiled-body phosphoprotein 1	10	7699200000	168	525050000	501120000	461050000	519310000	512450000	533610000	369010000	333960000	439490000	321220000	365730000	351310000	416120000	371410000	329940000	381290000	372790000	277280000	265510000	406050000
A0A087WUK2	HNRNPDL	Heterogeneous nuclear ribonucleoprotein D-like	13	7663500000	221	414380000	416270000	449000000	398330000	385690000	322550000	452410000	351060000	404270000	416560000	514400000	471180000	518870000	459620000	425890000	506020000	472630000	373060000	321470000	452730000
Q9H9B4	SFXN1	Sideroflexin-1	10	7644800000	145	483340000	432590000	498260000	461380000	507410000	572780000	479700000	737620000	694310000	498720000	237850000	273980000	294470000	282240000	269620000	280810000	262120000	468780000	428500000	345470000
A0A024RAV2	RECQL	ATP-dependent DNA helicase Q1	23	7624600000	317	287020000	268520000	282170000	320370000	306900000	369550000	344090000	407520000	356080000	380750000	498300000	466850000	537140000	481410000	497160000	574310000	580430000	525390000	565450000	569550000
A0A024R6Y2	NUTF2	Nuclear transport factor 2	7	7603500000	161	334650000	302620000	355880000	322150000	310030000	201700000	376860000	363680000	329410000	315770000	600420000	349580000	432640000	365310000	593080000	536260000	539620000	540630000	567700000	365060000
A0A384N6H6	2022-09-02	Septin-2	13	7581900000	234	224430000	251840000	272730000	239750000	240350000	292250000	338560000	342740000	280270000	352560000	677020000	556220000	594610000	575590000	620550000	530380000	545910000	570190000	616320000	524780000
Q96AG4	LRRC59	Leucine-rich repeat-containing protein 59	10	7577500000	166	498750000	372740000	537930000	412330000	448730000	464830000	359820000	339220000	386870000	248440000	392110000	421280000	455950000	474490000	413480000	443290000	394880000	513830000	413080000	576570000
B4DMT5	EIF3F	Eukaryotic translation initiation factor 3 subunit F	10	7571400000	203	417280000	410210000	407800000	402420000	390220000	442350000	418700000	396320000	458400000	467440000	405470000	449620000	399350000	470130000	405500000	438020000	472550000	403790000	382810000	391690000
A0A140VK46	PSMB4	Proteasome subunit beta type-4	7	7550600000	201	401240000	380840000	324900000	341760000	396150000	611050000	546590000	669800000	508020000	535580000	414870000	356260000	367090000	379410000	380550000	275150000	294070000	307800000	310550000	239830000
A0A140VJS3	PSMC5	26S protease regulatory subunit 8	25	7540000000	380	410690000	414310000	407390000	379640000	386680000	448010000	413500000	401390000	402060000	395740000	444140000	385140000	376830000	403360000	394530000	367760000	366220000	371210000	355080000	327170000
P30084	ECHS1	Enoyl-CoA hydratase, mitochondrial	16	7539100000	331	500850000	538530000	508640000	495640000	553470000	417710000	444670000	548310000	533590000	472860000	298930000	328970000	329060000	313080000	278120000	258630000	257260000	317890000	361280000	253960000
R4GMT0	ACTR1A	Alpha-centractin	11	7531900000	244	481480000	501660000	520080000	517130000	518980000	404650000	577770000	450540000	455540000	498150000	419800000	354890000	341280000	366610000	389430000	293990000	311260000	295000000	346620000	267910000
A0A024RAE1	C1orf33	mRNA turnover protein 4 homolog	15	7522200000	253	363180000	398830000	363640000	336360000	344090000	452430000	469180000	498230000	502870000	441980000	407920000	403370000	478940000	504650000	416950000	536100000	502170000	375350000	388430000	561000000
A0A0J9YVP6	PUF60	Poly(U)-binding-splicing factor PUF60	21	7427100000	371	415150000	424110000	410870000	420400000	380650000	375970000	419040000	351050000	382490000	433680000	451870000	442360000	437080000	406100000	421990000	483600000	474670000	373740000	437660000	467190000
Q13242	SRSF9	Serine/arginine-rich splicing factor 9	12	7411400000	190	383670000	384850000	342790000	358220000	383050000	403950000	358050000	446650000	376820000	422040000	378570000	379810000	422970000	398190000	395990000	563010000	499280000	408910000	483850000	449240000
A0A0S2Z489	PSMD12	26S proteasome non-ATPase regulatory subunit 12	17	7405000000	295	453360000	435150000	442660000	435800000	462390000	364790000	427010000	396870000	453090000	438640000	419300000	437730000	374600000	428340000	397020000	362880000	324150000	426470000	397560000	369040000
A0A024RC87	RNH1	Ribonuclease inhibitor	21	7387100000	318	286440000	313580000	307490000	304220000	332270000	302020000	312010000	329150000	317310000	352860000	579060000	499640000	512550000	525320000	532250000	503800000	478300000	637020000	578200000	412870000
V9HW29	HEL-S-61	Kinesin-like protein	35	7380800000	444	399060000	400230000	369210000	401430000	419180000	368260000	392440000	370890000	359900000	439400000	514770000	503240000	488470000	543710000	514250000	396330000	411380000	342770000	388390000	353880000
Q2TB59	NNT	NAD(P) transhydrogenase, mitochondrial	25	7374400000	291	859280000	768990000	769820000	841730000	898180000	546160000	352020000	585260000	433810000	305240000	55570000	110540000	114710000	65385000	74116000	159100000	119160000	286340000	209930000	245240000
A0A2U3TZH3	EEF1A2	Elongation factor 1-alpha 2	21	7372200000	387	380160000	342490000	378320000	350560000	375430000	308940000	364170000	411020000	579170000	314930000	370650000	190920000	198750000	217890000	295990000	193700000	204690000	251170000	238440000	139230000
B2R761	SCP2	Non-specific lipid-transfer protein	14	7352400000	159	376710000	402010000	376990000	399450000	464390000	521070000	441270000	604010000	509960000	555910000	272430000	301080000	324160000	372600000	339990000	395130000	350570000	342950000	461430000	332770000
A0A140VJK1	GLRX3	Glutaredoxin-3	18	7351400000	242	403850000	395900000	339940000	408050000	403340000	483880000	431040000	400780000	471210000	493430000	423170000	386230000	434690000	374280000	401980000	435350000	431930000	372400000	345450000	452980000
A0A096LPI6	C21orf33		10	7324000000	200	256940000	244830000	271130000	264380000	241750000	214250000	263010000	314930000	273930000	230020000	622830000	504480000	674420000	585770000	686260000	454340000	428410000	648110000	728090000	334570000
P52701	MSH6	DNA mismatch repair protein Msh6	42	7314500000	497	558560000	576110000	575760000	595440000	564390000	427940000	491420000	397950000	468740000	455210000	284580000	276650000	287160000	262820000	258940000	381320000	374520000	107520000	210310000	398760000
Q9H3K6	BOLA2	BolA-like protein 2	5	7265200000	164	496080000	453570000	465280000	486340000	462010000	424210000	390830000	487340000	394390000	447230000	435560000	379750000	340390000	390450000	356350000	335060000	301180000	388050000	368800000	278560000
V9HW59	HEL-S-274	Annexin	17	7259900000	159	647080000	692280000	691730000	623630000	703480000	766070000	845890000	789180000	703740000	933200000	0	0	0	0	0	0	0	0	0	0
B0YIW5	ARCN1	Coatomer subunit delta	26	7222800000	393	342090000	332080000	358400000	344200000	353740000	375040000	422240000	394730000	362820000	422940000	372950000	369620000	425410000	374060000	448030000	454150000	409040000	395200000	415400000	356640000
Q9BY44	EIF2A	Eukaryotic translation initiation factor 2A	25	7184900000	291	447300000	415760000	414260000	392840000	441150000	329620000	322220000	280690000	336910000	349370000	378890000	431070000	373200000	452640000	398120000	519390000	515940000	404240000	381680000	524810000
A8K2M0	PSMC4	26S protease regulatory subunit 6B	27	7168200000	339	337540000	389040000	348480000	374850000	320490000	455850000	409450000	341970000	407030000	359510000	427790000	379340000	452480000	460560000	471320000	444580000	435760000	400070000	438420000	388310000
Q02218	OGDH	2-oxoglutarate dehydrogenase, mitochondrial	36	7152300000	423	365460000	362150000	380630000	326010000	366970000	142780000	306580000	349420000	392530000	325610000	462400000	502280000	534840000	503100000	533230000	423870000	435640000	531270000	486350000	415170000
O43765	SGTA	Small glutamine-rich tetratricopeptide repeat-containing protein alpha	9	7106200000	197	329400000	339800000	299710000	373650000	373800000	316570000	300750000	357160000	316300000	343540000	491830000	500880000	437740000	510410000	413480000	412700000	411200000	454860000	465010000	453500000
CON__P02769			33	7093200000	270	119230000	128300000	79086000	82260000	66228000	177370000	127410000	996030000	2160400000	179240000	69453000	79520000	57705000	77034000	38986000	261000000	151180000	1655400000	932110000	364420000
O60832	DKC1	H/ACA ribonucleoprotein complex subunit 4	21	7065500000	351	394180000	397260000	391390000	390580000	406630000	441370000	369420000	426440000	411600000	415360000	355650000	359230000	386280000	359950000	330750000	391730000	412810000	373870000	390130000	425260000
Q9BXP5	SRRT	Serrate RNA effector molecule homolog	25	7047300000	343	373550000	386860000	365730000	413070000	367090000	433750000	389750000	359880000	361550000	441870000	367650000	353060000	388070000	380650000	406730000	381180000	388290000	358660000	414750000	408620000
Q9UBB4	ATXN10	Ataxin-10	20	7025700000	296	338840000	342470000	364410000	337710000	376470000	287050000	258090000	237140000	267320000	236970000	541910000	540000000	546890000	485990000	484200000	551840000	538130000	380800000	397930000	519600000
B0QYK0	EWSR1	RNA-binding protein EWS	7	7019100000	159	345520000	307880000	336400000	320800000	337910000	426990000	398720000	429980000	414690000	452440000	450360000	406840000	433310000	363450000	348350000	459190000	416320000	373210000	439950000	473780000
Q9C0C9	UBE2O	E2/E3 hybrid ubiquitin-protein ligase UBE2O	32	7014800000	429	445060000	454360000	460820000	443600000	463390000	384230000	419330000	386580000	354610000	422870000	339370000	402110000	361680000	347120000	375000000	312430000	359460000	275050000	314090000	349120000
P55036	PSMD4	26S proteasome non-ATPase regulatory subunit 4	10	7010100000	197	402330000	416620000	389180000	408170000	381000000	381580000	369880000	363800000	365970000	389560000	379570000	409720000	442910000	354870000	409310000	374620000	457730000	359500000	369900000	397920000
A0A024R5S5	EIF3S1	Eukaryotic translation initiation factor 3 subunit J	11	7005700000	175	476270000	512260000	488240000	466120000	453530000	434620000	422470000	433330000	410010000	456730000	337260000	377670000	322330000	296880000	323180000	340960000	325120000	242420000	285510000	370420000
A8K4G2	SYK	Tyrosine-protein kinase	28	6932800000	382	359420000	331690000	348470000	313540000	341700000	410120000	349530000	376430000	423970000	404670000	468940000	442980000	442130000	447680000	447230000	331730000	378200000	425390000	382360000	332180000
Q6FGH9	DNCL1	Dynein light chain 1, cytoplasmic	5	6932500000	166	389280000	379350000	420280000	352920000	444760000	306920000	451240000	358220000	397470000	477310000	478630000	388570000	325840000	424660000	356780000	333470000	273480000	328080000	359130000	343340000
A0A024R0R9	NAPA	Alpha-soluble NSF attachment protein	15	6908900000	300	443740000	431830000	459530000	421780000	468800000	383250000	402900000	365550000	371790000	411220000	374750000	385130000	342270000	363330000	361400000	340980000	335790000	298510000	320290000	337790000
O14561	NDUFAB1	Acyl carrier protein, mitochondrial	4	6898000000	141	326610000	383300000	431440000	344930000	388690000	362280000	312580000	400970000	369090000	330130000	381910000	422690000	277000000	371300000	316680000	309820000	320680000	393180000	345280000	324060000
Q92835	INPP5D	Phosphatidylinositol 3,4,5-trisphosphate 5-phosphatase 1	47	6897200000	479	103980000	103020000	80395000	144510000	65572000	84206000	232310000	158400000	69426000	197470000	590680000	657260000	544870000	611870000	594660000	655830000	595280000	885530000	1016600000	615010000
P05161	ISG15	Ubiquitin-like protein ISG15	7	6815100000	124	251840000	267400000	127350000	281310000	241930000	199450000	130450000	189540000	179270000	150740000	801280000	876780000	838690000	1132100000	938320000	128410000	143790000	174240000	173430000	141100000
A0A1B0GWJ0	ADSL	Adenylosuccinate lyase	14	6810000000	269	385930000	406490000	379870000	432720000	434240000	427830000	425530000	388000000	343710000	454280000	290580000	301430000	270800000	288430000	280760000	321400000	315950000	220710000	270140000	285200000
A0A024R4T4	UBE2M	NEDD8-conjugating enzyme Ubc12	7	6797600000	124	382280000	421330000	395140000	393840000	418190000	367660000	445370000	444580000	389610000	434860000	404070000	379930000	394220000	390390000	347860000	310400000	341980000	335430000	340390000	305530000
A0A024R3R5	LBR	Lamin-B receptor	11	6783000000	217	337800000	302410000	385750000	377760000	356590000	419990000	290810000	338950000	363470000	225450000	271260000	286590000	470030000	408440000	396800000	468030000	436980000	518490000	400280000	628300000
Q96CV8	THOP1	Thimet oligopeptidase	20	6762000000	258	296340000	317610000	297190000	287070000	349490000	294620000	323590000	331540000	311730000	363130000	479470000	512760000	516210000	470040000	488290000	497180000	474920000	351340000	380850000	439220000
A0A0S2Z5A5	2022-09-09	Septin-9	20	6753600000	237	295920000	247880000	294430000	293970000	318900000	342570000	337950000	342790000	316250000	342740000	417730000	398850000	419750000	448280000	362910000	504310000	516870000	499990000	538300000	484450000
Q9UMX0	UBQLN1	Ubiquilin-1	15	6717200000	254	339230000	345330000	380970000	296340000	340900000	357750000	427190000	366970000	324320000	418660000	413320000	375260000	431800000	429270000	441430000	407660000	414190000	372350000	383600000	351700000
A0A3B3IUD7	PDCD11	Protein RRP5 homolog	46	6699800000	496	442620000	439190000	426130000	456980000	441940000	412940000	380150000	396650000	402320000	395120000	306370000	321350000	372120000	332620000	330690000	308230000	300130000	320210000	302300000	321140000
P49748	ACADVL	Very long-chain specific acyl-CoA dehydrogenase, mitochondrial	23	6696400000	354	341650000	311770000	327510000	309560000	355400000	327490000	344660000	397630000	376350000	336940000	336940000	374330000	369460000	396710000	357330000	426740000	424950000	497190000	582630000	380980000
Q96CP5	PMPCB	Mitochondrial-processing peptidase subunit beta	18	6684200000	239	393640000	410020000	398900000	394660000	406910000	339530000	288070000	333510000	389580000	256760000	383330000	431130000	473330000	465900000	453450000	322370000	335850000	319450000	348180000	377870000
O14737	PDCD5	Programmed cell death protein 5	8	6659800000	151	276290000	306590000	300610000	274510000	278660000	396290000	373130000	337520000	341320000	379940000	510070000	504620000	448730000	479410000	449760000	423240000	449050000	265550000	320160000	406480000
A8K9T3	ACSL1	Long-chain-fatty-acid--CoA ligase 1	26	6654400000	320	490080000	504660000	507460000	471900000	464910000	421040000	349480000	451650000	397620000	362140000	348070000	466780000	469440000	435160000	457670000	113420000	135470000	187990000	158740000	182080000
A0A024RBX9	PDHA1	Pyruvate dehydrogenase E1 component subunit alpha	16	6650300000	232	400910000	430930000	467870000	402120000	448630000	325710000	317860000	455270000	402660000	319230000	357640000	378700000	400010000	370930000	351540000	266070000	284770000	378360000	338890000	248870000
Q13043	STK4	Serine/threonine-protein kinase 4	20	6643800000	355	357450000	358180000	359330000	340800000	330810000	278900000	324230000	305920000	304510000	366470000	357560000	399760000	363060000	384690000	329890000	428860000	453850000	452750000	481430000	453260000
Q92878	RAD50	DNA repair protein RAD50	42	6604400000	446	347420000	327470000	331370000	327190000	334550000	380010000	351290000	440970000	381610000	444500000	387150000	403090000	364920000	377720000	361080000	356920000	400720000	346940000	374730000	347670000
A0A024R6Q1	EIF5	Eukaryotic translation initiation factor 5	14	6597400000	191	446790000	466530000	446070000	411560000	387050000	411030000	432510000	344840000	411290000	384470000	366420000	333710000	343750000	323440000	341660000	285070000	270920000	306260000	248230000	251460000
P06730	EIF4E	Eukaryotic translation initiation factor 4E	9	6584200000	159	399360000	389570000	268860000	378600000	396050000	443240000	417410000	381190000	354640000	414130000	342520000	321930000	375940000	329710000	327410000	360790000	362050000	275240000	356530000	413050000
Q10713	PMPCA	Mitochondrial-processing peptidase subunit alpha	20	6582600000	196	329470000	350440000	302150000	318940000	364820000	292420000	229730000	423230000	361290000	248850000	476840000	484680000	400120000	516880000	545620000	395730000	368410000	438760000	475470000	338240000
Q13813	SPTAN1	Spectrin alpha chain, non-erythrocytic 1	74	6581500000	601	345480000	365710000	360130000	308720000	400560000	397390000	398980000	386340000	360110000	387180000	395010000	409230000	439180000	418890000	398820000	315590000	339550000	339330000	328750000	294420000
A0A024RC33	MAPRE2	Microtubule-associated protein RP/EB family member 2	16	6575500000	268	238250000	223070000	201060000	237560000	203570000	209930000	286700000	224610000	284350000	246620000	557680000	462180000	460520000	454110000	471870000	535850000	456770000	409640000	457030000	468870000
B2R7R5	PRPSAP2	Phosphoribosyl pyrophosphate synthase-associated protein 2	15	6553800000	310	376900000	306290000	329800000	317440000	343520000	438110000	429620000	416380000	325200000	445140000	375750000	292670000	299340000	281850000	342430000	335130000	334480000	340330000	391530000	310520000
Q12904	AIMP1	Aminoacyl tRNA synthase complex-interacting multifunctional protein 1	14	6538800000	240	492570000	434320000	424160000	371850000	400650000	386340000	390930000	367330000	392420000	455930000	341110000	364790000	351740000	311040000	342820000	308510000	274510000	259870000	263250000	269180000
V9HW71	HEL-S-107	Endoplasmic reticulum resident protein 29	11	6531900000	179	405650000	448570000	453640000	424700000	443360000	444060000	412000000	413110000	385360000	446130000	267190000	308740000	325970000	283310000	277410000	298580000	299690000	298290000	372510000	274140000
Q59EH3	ACP1	Low molecular weight phosphotyrosine protein phosphatase	9	6519300000	162	313570000	304240000	307540000	314710000	306370000	422620000	384030000	362420000	337330000	421230000	286950000	351090000	353430000	335920000	373960000	426200000	441530000	499910000	429220000	407920000
B3KN57	SNX2	Sorting nexin-2	19	6514800000	272	379700000	340650000	351010000	354070000	374310000	402310000	319850000	390010000	299170000	365520000	339500000	388410000	358390000	383220000	336770000	418760000	399540000	406330000	445010000	364620000
Q14258	TRIM25	E3 ubiquitin/ISG15 ligase TRIM25	23	6501600000	354	399290000	401590000	393730000	385870000	390040000	400910000	387690000	352230000	395990000	446900000	343690000	310270000	354860000	319790000	331930000	273050000	295430000	304150000	293810000	265990000
E5KRK5	NDUFS1	NADH-ubiquinone oxidoreductase 75 kDa subunit, mitochondrial	29	6477200000	397	363890000	387820000	398500000	381300000	392910000	295810000	337320000	365000000	399670000	300810000	431070000	383710000	416630000	408620000	451330000	297910000	274890000	319500000	296230000	252630000
V9HWG0	HEL25	Chromobox protein homolog 5	12	6474900000	213	376750000	376650000	364840000	368390000	380300000	370420000	392590000	408390000	367350000	435050000	308420000	208420000	286740000	305970000	278090000	445670000	391260000	276890000	318550000	430660000
B2R4D5	ARPC3	Actin-related protein 2/3 complex subunit 3	8	6448400000	146	260380000	343330000	269030000	316640000	265350000	301010000	273860000	290600000	264820000	267820000	499940000	401110000	408550000	408410000	438450000	394920000	485190000	355080000	425930000	403990000
F8WJN3	CPSF6	Cleavage and polyadenylation specificity factor subunit 6	11	6441800000	232	355960000	319270000	368620000	335890000	365350000	373340000	370810000	353150000	321490000	415750000	330670000	306590000	346940000	359780000	317280000	405770000	420290000	367510000	369640000	346480000
A8K9T9	PFAS	Phosphoribosylformylglycinamidine synthase	34	6422000000	378	399950000	384820000	353920000	389900000	372260000	262350000	297870000	286710000	220690000	280660000	412380000	408470000	377990000	343110000	334810000	432080000	426440000	315360000	358740000	406050000
A0A024R566	SF1	Splicing factor 1	15	6408600000	259	342410000	336880000	373110000	336900000	369630000	409140000	372600000	352160000	344970000	380720000	354490000	333870000	286900000	301630000	307760000	319710000	327880000	306190000	330260000	354320000
E5RG17	TATDN1	Putative deoxyribonuclease TATDN1	13	6402600000	142	493740000	703740000	696620000	767690000	757110000	606850000	612610000	704270000	575640000	754840000	0	0	0	0	0	32964000	0	0	0	0
A0A024R222	PSAT1	Phosphoserine aminotransferase	17	6401200000	295	272710000	305950000	278070000	295520000	323220000	281300000	269540000	195630000	242390000	238410000	549330000	571290000	550610000	538920000	528100000	385720000	405090000	411820000	348390000	355240000
B7ZLC9	GEMIN5	Gem-associated protein 5	38	6390500000	462	409710000	404100000	370830000	451450000	401990000	350250000	366070000	309190000	342080000	277550000	368720000	369830000	302000000	344740000	315010000	355450000	346230000	300180000	275450000	468630000
A0A024R5H0	BANF1	Barrier-to-autointegration factor	5	6382700000	128	197400000	327620000	291860000	308700000	394840000	354980000	307460000	266130000	309180000	280600000	397160000	249040000	346250000	311020000	559870000	370520000	388020000	389940000	502120000	440260000
C9J4Z3	RPL37A	60S ribosomal protein L37a	4	6380200000	110	396220000	385660000	326520000	331020000	326250000	406680000	335060000	349880000	383580000	372810000	328180000	289210000	291840000	283860000	222610000	228410000	242030000	255950000	296580000	311910000
F5GZS6	SLC3A2	4F2 cell-surface antigen heavy chain	22	6345300000	290	396910000	402650000	404580000	442380000	384060000	404960000	335040000	332030000	405560000	258310000	383970000	359170000	356310000	339240000	330480000	306640000	322730000	251980000	207770000	449570000
P18085	ARF4	ADP-ribosylation factor 4	10	6334300000	130	469110000	482360000	463430000	466970000	496110000	302030000	273410000	294270000	306010000	296220000	342610000	383510000	445410000	419490000	426590000	241020000	245250000	236600000	244570000	218830000
Q14061	COX17	Cytochrome c oxidase copper chaperone	3	6324000000	38	392120000	0	330170000	413380000	312500000	0	306250000	0	0	0	304010000	361740000	337740000	387330000	372660000	282330000	303000000	0	303420000	0
A0A024R6K8	WARS	Tryptophan--tRNA ligase, cytoplasmic	21	6311200000	292	638630000	540170000	521500000	520030000	535180000	381450000	509600000	460430000	524390000	453510000	161860000	165970000	163620000	162870000	172040000	130120000	157410000	168880000	165680000	133050000
A0A0S2Z5K8	HEL162	Spermatid perinuclear RNA-binding protein	30	6305800000	254	304840000	297600000	282420000	322510000	318790000	248420000	275290000	371640000	242600000	347540000	409710000	393930000	360460000	391860000	368420000	441420000	526810000	378900000	363500000	471170000
B4DYY5	UBAP2L	Ubiquitin-associated protein 2-like	18	6248500000	305	369580000	356520000	368860000	394680000	367450000	351290000	364070000	349220000	353500000	392550000	368020000	346950000	293130000	334350000	330190000	396690000	381680000	232750000	221840000	420800000
V9HWE0	HEL-S-7	Annexin	15	6245700000	249	380760000	402760000	406120000	389660000	418710000	472230000	448050000	471920000	415580000	465890000	285420000	272000000	289720000	291690000	285080000	268630000	250300000	192690000	275400000	236860000
Q9BWF3	RBM4	RNA-binding protein 4	17	6240500000	284	456340000	427150000	421310000	521540000	470540000	494410000	440090000	399800000	453530000	406260000	210380000	252460000	256890000	242750000	221590000	242090000	244220000	192390000	192170000	245170000
Q6FHQ0	RBBP7	Histone-binding protein RBBP7	13	6238500000	147	384430000	391160000	550850000	348730000	400190000	401010000	439820000	366510000	461770000	491150000	251800000	205650000	236970000	286990000	238900000	304830000	325550000	197210000	232820000	276140000
Q9UBQ5	EIF3K	Eukaryotic translation initiation factor 3 subunit K	8	6235000000	216	375770000	386320000	388490000	416250000	379550000	310330000	310810000	295510000	342920000	382380000	390200000	362410000	334310000	337600000	330130000	306430000	288150000	326020000	278530000	293320000
E7ETZ4	BZW2	Basic leucine zipper and W2 domain-containing protein 2	18	6228700000	241	239580000	275350000	249850000	274560000	257530000	235740000	207950000	162260000	207530000	196860000	465220000	499720000	441430000	517190000	511530000	458370000	494360000	414540000	379340000	490080000
K7EQ55	DAZAP1	DAZ-associated protein 1	9	6198200000	148	221690000	160210000	251600000	0	204210000	188570000	280620000	238170000	228420000	276670000	597880000	495410000	483330000	414590000	495960000	493960000	542300000	495250000	521160000	480100000
A0A140VJJ2	ESD	S-formylglutathione hydrolase	11	6198100000	219	134800000	142330000	175280000	158250000	137910000	126010000	164750000	157820000	168010000	109720000	673030000	517710000	611600000	520920000	608350000	487650000	558600000	496350000	520600000	449370000
Q6PKG0	LARP1	La-related protein 1	32	6195200000	324	357890000	330350000	321370000	295190000	322080000	249960000	305690000	264690000	279150000	325700000	456600000	389800000	405990000	404030000	410960000	406600000	413000000	306220000	295710000	390940000
Q9UHB9	SRP68	Signal recognition particle subunit SRP68	24	6194800000	348	451980000	461260000	406880000	457450000	460000000	451370000	389820000	422420000	383930000	418980000	229730000	251980000	255400000	235110000	250930000	246750000	225120000	268970000	280020000	244730000
E9PGT1	TSN	Translin	11	6183400000	235	446330000	409780000	383310000	427660000	370250000	380320000	366190000	370580000	341660000	365590000	133410000	135150000	137530000	181840000	145400000	357340000	381310000	283260000	296140000	330670000
A6NEM2	HCFC1		29	6173700000	375	389010000	403160000	418080000	381470000	364420000	386110000	354740000	369930000	334770000	410740000	290810000	283420000	291780000	294340000	256350000	354510000	341970000	292210000	320440000	309760000
A0A140VJS6	PSMB2	Proteasome subunit beta type-2	11	6173000000	169	273000000	304460000	285880000	312710000	260080000	526480000	418300000	482800000	392660000	452510000	260500000	316040000	355950000	385100000	324700000	293720000	312140000	256450000	262380000	300560000
P04899	GNAI2	Guanine nucleotide-binding protein G(i) subunit alpha-2	15	6173000000	180	374820000	390730000	356780000	428810000	438190000	535460000	434450000	483430000	470140000	326700000	202060000	239080000	222560000	257460000	248670000	293410000	288540000	287190000	286170000	308700000
A0A024R8P8	RPL38	60S ribosomal protein L38	6	6166700000	260	220670000	233830000	231590000	231600000	251590000	290690000	306400000	171250000	233720000	232350000	469590000	419730000	474720000	451100000	476040000	516130000	462680000	443290000	400970000	425390000
A0A0G2JH68	DIAPH1	Protein diaphanous homolog 1	35	6149200000	419	397490000	404300000	411710000	407390000	406060000	349140000	394080000	402940000	398000000	409940000	346020000	308140000	347350000	331960000	328850000	261880000	256890000	235720000	245520000	207160000
Q7Z7K6	CENPV	Centromere protein V	8	6120500000	201	521810000	511390000	582530000	545870000	570780000	389770000	462560000	466020000	481300000	489380000	146920000	153050000	145700000	142690000	145790000	127070000	149100000	128290000	138270000	135670000
P49756	RBM25	RNA-binding protein 25	20	6100900000	290	335160000	369790000	412430000	349470000	384330000	354510000	381150000	368310000	356040000	383970000	296550000	326220000	235140000	305000000	236710000	291820000	315520000	291410000	329200000	341420000
Q53HD9	TTC1	Tetratricopeptide repeat protein 1	11	6069600000	205	434400000	463700000	420570000	419310000	442220000	460140000	394910000	438770000	398070000	490340000	164070000	200060000	176910000	182140000	179180000	220160000	260500000	161550000	205210000	205350000
V9HW89	HEL-S-95n	Sorbitol dehydrogenase	14	6066100000	232	431810000	459600000	450420000	456210000	456490000	305340000	332610000	347770000	312240000	328340000	362260000	318760000	321190000	331960000	315550000	230810000	209890000	209980000	221360000	194920000
Q5LJA5	UCHL5	Ubiquitin carboxyl-terminal hydrolase	13	6052100000	239	368030000	386020000	380020000	407160000	364470000	454550000	418590000	391620000	448270000	441820000	268420000	267430000	280150000	290790000	283680000	254060000	289250000	174940000	256070000	247610000
CON__Q3ZBS7			12	6049800000	178	178150000	143680000	114930000	101620000	141630000	287060000	228810000	1060300000	1668600000	332670000	70543000	105460000	72901000	58647000	83107000	224410000	169390000	759500000	576180000	286000000
Q8WWM7	ATXN2L	Ataxin-2-like protein	25	6049500000	353	403460000	401450000	372970000	388360000	383430000	423070000	369920000	394670000	346130000	450170000	259880000	236170000	251290000	254840000	229050000	299680000	331730000	223460000	232460000	342170000
Q02880	TOP2B	DNA topoisomerase 2-beta	53	6047100000	445	188590000	166690000	180150000	176830000	222680000	318560000	290800000	308280000	277470000	298620000	422140000	407070000	471110000	425870000	388880000	493310000	525450000	393330000	525160000	478710000
A0A090N7V5	C7orf24	Gamma-glutamylcyclotransferase	8	6026600000	126	301400000	331940000	273970000	296160000	297580000	331450000	327660000	344340000	278890000	359740000	401100000	449880000	348680000	386140000	349200000	322110000	354260000	369470000	337980000	332300000
B4DY23	hEMMPRIN	Basigin	9	6011200000	185	525310000	482460000	509200000	468610000	497970000	512540000	518330000	551630000	530460000	330130000	146510000	169160000	141970000	142660000	184360000	168100000	145550000	123740000	131360000	186900000
Q06187	BTK	Tyrosine-protein kinase BTK	29	6010900000	347	354770000	376740000	318910000	328530000	339850000	369290000	295010000	284760000	322390000	319770000	309970000	322510000	301140000	316200000	318930000	364470000	364430000	408680000	393450000	382480000
Q9Y2L1	DIS3	Exosome complex exonuclease RRP44	27	5993100000	358	402490000	458540000	424750000	442740000	416980000	362480000	335460000	349060000	407870000	383130000	264110000	300200000	300850000	274050000	256120000	271840000	275500000	237270000	204130000	262030000
E9PN17	ATP5L	ATP synthase subunit g, mitochondrial	5	5986100000	167	311580000	317020000	322310000	312350000	331940000	308740000	269210000	330450000	318640000	225410000	255960000	286040000	280520000	330710000	321680000	280530000	247860000	298920000	279820000	343610000
A0A024RAM2	GLRX	Glutaredoxin-1	6	5977800000	114	254960000	221680000	199570000	226860000	256420000	260790000	250070000	220750000	247400000	234850000	518800000	492750000	533890000	430410000	522490000	337730000	361620000	420430000	441970000	348830000
A8K6Q8			23	5972500000	312	412840000	442220000	431190000	472320000	372170000	167310000	159960000	96633000	200710000	48243000	440630000	491020000	568760000	554170000	526550000	274510000	266400000	304280000	161840000	347590000
Q6IBR2	FARSLA	Phenylalanine--tRNA ligase alpha subunit	17	5972000000	265	242330000	268990000	222290000	272580000	265240000	290280000	291270000	277250000	279340000	292510000	392580000	407430000	423820000	431420000	453670000	388380000	389180000	363850000	389860000	384260000
A0A024R1S8	LASP1	LIM and SH3 domain protein 1	11	5954700000	163	300640000	320060000	308180000	320160000	329020000	361980000	347820000	379180000	278490000	364950000	276620000	342010000	236910000	326950000	299320000	238130000	315630000	465540000	368790000	311030000
O95831	AIFM1	Apoptosis-inducing factor 1, mitochondrial	19	5950500000	255	316070000	293640000	351160000	311380000	287780000	296150000	297120000	327190000	346770000	277530000	318380000	360610000	418030000	361800000	421760000	328960000	355300000	397310000	372370000	346950000
Q96G03	PGM2	Phosphoglucomutase-2	20	5930200000	266	354390000	349560000	384130000	369530000	387980000	386720000	358680000	397630000	330000000	434990000	278360000	294920000	257040000	295680000	258700000	306130000	285390000	248820000	312070000	264020000
Q9Y3Z3	SAMHD1	Deoxynucleoside triphosphate triphosphohydrolase SAMHD1	31	5926900000	327	83051000	86559000	136020000	120140000	85165000	98976000	113290000	97797000	144740000	160500000	564070000	508450000	509290000	579480000	468470000	651650000	558970000	556150000	666210000	675510000
A0A140VKF2	PSMD14	26S proteasome non-ATPase regulatory subunit 14	8	5913800000	183	375040000	341120000	365450000	374310000	389130000	381610000	348550000	317180000	348800000	359490000	292550000	310030000	269600000	254290000	291830000	289140000	324480000	347000000	302910000	265320000
Q53GQ0	HSD17B12	Very-long-chain 3-oxoacyl-CoA reductase	14	5913400000	273	241940000	195850000	239290000	250190000	230600000	346950000	306430000	315490000	352750000	222890000	290300000	298530000	395040000	351290000	405830000	347290000	347060000	670520000	485380000	408200000
O96019	ACTL6A	Actin-like protein 6A	14	5913200000	232	274850000	294710000	307110000	275580000	315570000	291950000	306060000	325410000	321240000	320180000	386790000	330980000	344530000	339900000	345470000	393970000	396430000	305180000	322110000	393940000
P36871	PGM1	Phosphoglucomutase-1	26	5909600000	259	470960000	458650000	486140000	492060000	568120000	350140000	341680000	410550000	303890000	388650000	234210000	240070000	236000000	265300000	237280000	174000000	187430000	162350000	207910000	173670000
E7EX90	DCTN1	Dynactin subunit 1	40	5894400000	430	403130000	397330000	365920000	396770000	407930000	327360000	406310000	389930000	349160000	390430000	295330000	270700000	256190000	244340000	232070000	230670000	229530000	206670000	263340000	251330000
Q9NQW7	XPNPEP1	Xaa-Pro aminopeptidase 1	22	5881900000	321	280740000	298650000	333010000	287640000	303790000	308420000	367850000	358930000	324760000	354400000	355300000	335460000	309650000	332890000	329390000	322560000	350310000	353520000	382470000	329260000
B2RB23	ACAA2	3-ketoacyl-CoA thiolase, mitochondrial	21	5850100000	237	0	0	0	0	0	0	0	0	0	0	620270000	614700000	732100000	680180000	698820000	644050000	640850000	785380000	802580000	565600000
A0AVP6	UTS2	Urotensin-2	1	5848500000	30	0	0	0	0	0	0	0	0	0	0	0	0	0	0	0	0	0	0	0	265320000
A0A024R071	NUP155	Nuclear pore complex protein Nup155	30	5824100000	402	325490000	353710000	336870000	332070000	317500000	366800000	356900000	341340000	360220000	384490000	261930000	267550000	301910000	297410000	270140000	313560000	314990000	271450000	299970000	307580000
Q86XP3	DDX42	ATP-dependent RNA helicase DDX42	27	5808500000	398	433370000	433140000	413960000	415640000	392470000	371660000	359100000	309300000	337450000	361260000	226140000	252090000	249070000	242560000	236040000	253110000	283180000	185230000	205610000	269610000
Q9Y277	VDAC3	Voltage-dependent anion-selective channel protein 3	9	5806000000	170	352870000	278230000	365160000	342510000	342980000	390590000	286240000	343870000	319940000	226940000	203450000	202790000	297320000	335750000	269520000	339940000	312380000	523640000	372770000	475510000
O14776	TCERG1	Transcription elongation regulator 1	29	5763300000	357	329980000	348490000	330000000	350650000	338150000	378650000	332600000	354490000	305660000	385050000	231470000	283970000	300120000	308640000	256110000	333990000	397940000	287240000	315900000	304000000
A0A024QZN7	C10orf70	CDGSH iron-sulfur domain-containing protein 1	7	5751200000	206	337740000	239060000	343380000	309330000	309060000	271580000	277640000	358490000	384700000	227780000	248240000	283430000	328100000	317580000	283850000	289770000	300470000	440830000	362350000	327880000
P09661	SNRPA1	U2 small nuclear ribonucleoprotein A	11	5745700000	231	300810000	308490000	285400000	316100000	295280000	374970000	340860000	364430000	263880000	349600000	292820000	292620000	335570000	311380000	274940000	346810000	387930000	311460000	316550000	350660000
Q9BQG0	MYBBP1A	Myb-binding protein 1A	41	5738300000	412	240720000	262000000	245700000	252510000	245390000	225350000	231980000	224570000	239160000	231030000	411540000	417020000	424880000	387260000	436400000	394230000	395100000	451470000	406620000	421460000
Q14684	RRP1B	Ribosomal RNA processing protein 1 homolog B	24	5721100000	338	403330000	389800000	386200000	374240000	373620000	324460000	287800000	300990000	313340000	365790000	250740000	269400000	298910000	293320000	273380000	290900000	291440000	224520000	241730000	292050000
A0A1W2PNM1	HADH	Hydroxyacyl-coenzyme A dehydrogenase, mitochondrial	9	5668600000	271	268140000	241980000	253740000	210010000	262270000	296640000	272720000	262170000	325990000	216650000	338210000	256810000	351520000	291030000	378110000	342470000	217390000	531660000	454400000	241450000
B2R6K4	GNB1	Guanine nucleotide-binding protein G(I)/G(S)/G(T) subunit beta-1	11	5645600000	167	266030000	291270000	298140000	312780000	348070000	319300000	415820000	452270000	370250000	433440000	288480000	248510000	190770000	240280000	209810000	261540000	270580000	294820000	294770000	247000000
B4DKX4	PDCD4	Programmed cell death protein 4	17	5643500000	206	81856000	57077000	138260000	118930000	114650000	161170000	213190000	263200000	168650000	195670000	489850000	506430000	398930000	511780000	471860000	411880000	460130000	664760000	641310000	350860000
A0A023T787	RBM8	RNA-binding protein 8A	7	5632600000	161	318520000	341880000	312050000	314690000	309110000	262480000	340320000	353220000	329730000	357570000	268540000	262560000	256960000	243550000	253440000	313950000	266330000	271350000	266410000	367380000
A6NMQ3	ENSA	Alpha-endosulfine	13	5628600000	160	355560000	309290000	340010000	333990000	376830000	420150000	360760000	337270000	357020000	457870000	203040000	232760000	238050000	276010000	232970000	228890000	288000000	150490000	212770000	234300000
Q8TEM1	NUP210	Nuclear pore membrane glycoprotein 210	36	5584800000	355	229300000	112240000	248220000	199680000	196650000	369480000	218370000	304900000	304930000	205570000	229260000	262760000	349990000	318080000	304450000	446210000	401620000	584270000	540600000	623970000
P09496	CLTA	Clathrin light chain A	7	5579600000	78	358160000	321770000	240650000	376270000	319820000	349950000	301420000	425310000	338310000	304930000	275750000	274930000	371810000	389360000	221160000	266320000	275650000	259270000	281970000	234160000
P19623	SRM	Spermidine synthase	14	5575400000	204	225300000	232720000	206320000	211970000	224940000	349090000	318580000	315290000	315220000	349140000	386360000	436690000	373570000	406520000	350410000	301040000	332010000	265330000	313440000	360610000
A0A024R7M8	LOC115098	Coiled-coil domain-containing protein 124	9	5574700000	215	350250000	386790000	309080000	338780000	359980000	367830000	341660000	342010000	325510000	351060000	329230000	283110000	269740000	194270000	236050000	208960000	205880000	129020000	197750000	227790000
A0A140VJQ4	OAT	Ornithine aminotransferase, mitochondrial	16	5566500000	191	300330000	315200000	343020000	326050000	305840000	368270000	350630000	426140000	400600000	359930000	219360000	263330000	226600000	214870000	250080000	346270000	388330000	393450000	323800000	373150000
Q9BPW0	PPP5C	Serine/threonine-protein phosphatase	17	5564600000	255	407440000	356620000	391210000	416810000	401690000	296610000	328370000	369720000	319100000	367650000	323690000	270790000	253840000	280150000	262740000	233820000	244600000	206040000	219760000	204760000
B1AQP2	PFDN2	Prefoldin subunit 2	5	5561700000	103	337580000	291880000	297660000	293020000	347120000	331140000	335140000	318440000	287750000	332980000	290900000	308330000	276590000	276210000	319020000	329610000	332300000	270660000	313430000	361770000
P49006	MARCKSL1	MARCKS-related protein	6	5557800000	154	220790000	240990000	190010000	230810000	228950000	269990000	262730000	208040000	204850000	262660000	338020000	385210000	354890000	438160000	352250000	237130000	285790000	279590000	304420000	245050000
P15498	VAV1	Proto-oncogene vav	29	5557400000	327	274810000	318220000	274100000	296820000	290010000	281520000	298050000	338440000	282960000	323470000	307930000	296720000	334620000	329670000	329890000	312150000	316480000	380460000	380910000	304310000
Q93084	ATP2A3	Sarcoplasmic/endoplasmic reticulum calcium ATPase 3	28	5536600000	286	284920000	232210000	251450000	275670000	232100000	425230000	339890000	402290000	380180000	267950000	246200000	241500000	282880000	286010000	272350000	261360000	270130000	545320000	399360000	354200000
A0A384P5Q0	CAT	Catalase	22	5531200000	259	390250000	347710000	370340000	377650000	379660000	448460000	375380000	551030000	421830000	419080000	177270000	178580000	144000000	174730000	150570000	250260000	271070000	245580000	258410000	257120000
A0A024R4X0	CYB5R3	NADH-cytochrome b5 reductase	12	5523900000	174	268830000	210090000	266300000	264410000	271770000	297530000	238220000	308480000	255930000	176990000	278530000	325970000	469180000	389560000	421640000	342500000	340080000	518890000	381810000	390680000
O00148	DDX39A	ATP-dependent RNA helicase DDX39A	21	5505300000	271	171090000	202450000	173760000	176960000	159950000	163320000	182320000	154670000	178820000	179490000	273300000	293130000	406240000	408310000	375400000	505670000	539350000	459400000	451350000	431380000
P36507	MAP2K2	Dual specificity mitogen-activated protein kinase kinase 2	20	5498600000	219	205770000	154180000	152260000	185310000	219140000	0	200470000	112240000	118850000	250910000	489970000	323350000	335880000	373200000	526750000	400920000	444730000	499180000	513610000	347370000
J3KS22	DCXR	L-xylulose reductase	10	5484800000	202	358940000	339800000	357460000	322430000	360530000	406290000	377570000	453970000	372500000	370590000	149080000	179560000	169890000	173670000	159100000	307490000	280150000	356520000	398150000	224820000
A0A346M047	cox2	Cytochrome c oxidase subunit 2	5	5483500000	105	412410000	329780000	409090000	390580000	330620000	364520000	269250000	272420000	332500000	229760000	262520000	280570000	317570000	330780000	322930000	195520000	215780000	302360000	188050000	316580000
O60711	LPXN	Leupaxin	11	5477200000	196	233290000	218630000	196450000	228290000	223960000	242820000	215380000	224920000	232900000	239990000	338260000	335880000	387350000	392510000	385310000	369310000	415990000	464910000	437590000	398760000
A0A024R1U4	RAB5C	Ras-related protein Rab-5C	7	5470400000	159	292760000	285310000	289210000	312600000	325780000	329200000	284090000	303280000	272120000	234810000	275300000	266860000	322780000	319060000	329240000	304180000	295770000	443260000	361440000	343380000
A0A0S2Z3X8	GDI1	Rab GDP dissociation inhibitor alpha	24	5464400000	219	323650000	325640000	324070000	327100000	358130000	346240000	351680000	415500000	303980000	384610000	232680000	239790000	244520000	268800000	255100000	250230000	245160000	340050000	350510000	193570000
A0A0K0K1K7	PGLS	6-phosphogluconolactonase	12	5451500000	198	383760000	359190000	367090000	385780000	427230000	321160000	345260000	338950000	270620000	371790000	257880000	261530000	235790000	247790000	248440000	224530000	262480000	227620000	260560000	221970000
A0A024R4U3	TTLL12	Tubulin--tyrosine ligase-like protein 12	22	5433900000	319	338720000	338260000	338500000	349580000	321520000	242610000	305550000	287620000	316230000	296090000	287040000	302530000	291280000	288510000	300430000	298370000	282050000	308060000	279720000	293610000
O15511	ARPC5	Actin-related protein 2/3 complex subunit 5	6	5423600000	106	276180000	262680000	238920000	244000000	255880000	292110000	260690000	256070000	225770000	115820000	424980000	365610000	399080000	380530000	382720000	343390000	424100000	321060000	357860000	347740000
J3KN29	PSMD9	26S proteasome non-ATPase regulatory subunit 9	7	5421800000	131	320950000	325790000	324460000	279470000	382340000	326850000	349160000	342250000	298550000	412240000	251230000	301550000	247240000	212240000	212040000	208300000	188480000	216200000	212570000	204180000
P52306	RAP1GDS1	Rap1 GTPase-GDP dissociation stimulator 1	26	5419900000	354	205980000	142050000	167670000	161430000	168040000	60723000	54465000	110380000	130530000	51792000	508730000	428020000	412100000	452800000	530930000	505850000	556500000	496910000	488140000	452080000
Q9Y6C9	MTCH2	Mitochondrial carrier homolog 2	12	5411800000	216	301300000	312770000	330450000	299850000	329470000	375000000	249020000	275550000	277930000	216970000	229840000	270090000	327880000	323730000	295710000	284110000	241320000	415730000	305070000	361130000
V9HW74	HEL-117	Ubiquitin carboxyl-terminal hydrolase	9	5394600000	84	583840000	652610000	617620000	615420000	629570000	572620000	507730000	495910000	488560000	542550000	0	0	0	0	0	0	0	0	0	0
A0A140VKE9	DYNC1I2	Cytoplasmic dynein 1 intermediate chain 2	14	5393000000	216	308960000	303810000	352000000	363030000	349050000	309340000	327340000	312190000	261890000	367410000	241710000	268380000	233980000	258060000	231920000	228140000	235210000	218920000	255610000	233570000
A0A140VJY7	TXNDC17	Thioredoxin domain-containing protein 17	5	5391400000	72	205520000	175670000	195690000	195270000	176190000	182720000	185660000	187270000	219320000	229240000	431770000	506640000	502550000	513600000	445680000	398400000	430260000	265550000	337020000	323220000
A0A024RDG1	VDP	General vesicular transport factor p115	27	5388200000	350	370160000	374670000	358850000	406540000	377210000	401690000	388010000	431690000	383350000	462740000	179730000	212170000	195870000	169400000	202950000	197000000	178150000	163470000	196140000	160490000
P26447	S100A4	Protein S100-A4	4	5388000000	45	785660000	900760000	867540000	859100000	882090000	0	238160000	161420000	162850000	277090000	0	0	0	0	0	57976000	0	0	105990000	65148000
A0A0F7KYT8	FXR1	Fragile X mental retardation syndrome-related protein 1	25	5380300000	294	259260000	275440000	253860000	273050000	256350000	334980000	243850000	310170000	282090000	235250000	396610000	341190000	357870000	376650000	384170000	311640000	326700000	308240000	316590000	319170000
O94906	PRPF6	Pre-mRNA-processing factor 6	29	5352500000	358	352270000	303390000	337180000	320270000	361390000	325620000	321050000	371340000	323890000	355730000	238350000	266110000	247810000	276570000	218150000	266880000	269090000	278540000	277720000	301860000
O75396	SEC22B	Vesicle-trafficking protein SEC22b	7	5346400000	141	273560000	244980000	280880000	297930000	307930000	317290000	234230000	299010000	253970000	174200000	224330000	273150000	286930000	274040000	243170000	295630000	276090000	444180000	349820000	365060000
A0A024R663	KTN1	Kinectin	32	5322700000	415	395030000	379640000	384410000	376770000	393790000	370790000	345230000	391190000	357770000	328950000	234400000	222460000	246730000	255590000	228020000	184580000	180170000	194570000	199180000	206490000
A0A024R3Z6	BZW1	Basic leucine zipper and W2 domain-containing protein 1	14	5304700000	143	315410000	284010000	300990000	301140000	303640000	373310000	292670000	293120000	341460000	351410000	299050000	293020000	328950000	311680000	302420000	273530000	252230000	235770000	191900000	303510000
Q15021	NCAPD2	Condensin complex subunit 1	46	5291900000	469	246790000	302470000	259270000	237360000	264310000	379170000	337900000	300450000	335670000	342430000	315920000	321140000	270140000	282610000	291630000	407020000	368930000	74338000	194440000	417940000
A0A090N7T9	SCRN1	Secernin-1	17	5275100000	303	276480000	284450000	225180000	264210000	280280000	302590000	261860000	323190000	258760000	270690000	245220000	258880000	268630000	264360000	288370000	295240000	275970000	378170000	370510000	199790000
H7BZJ3	PDIA3		8	5272300000	25	0	0	0	0	0	0	0	0	0	0	0	0	0	0	0	0	0	0	0	275120000
Q96HI4	NMT1	Glycylpeptide N-tetradecanoyltransferase	12	5239200000	240	311210000	300790000	325360000	317390000	324280000	342540000	373720000	355590000	324630000	313660000	268310000	234370000	241250000	251480000	280860000	250720000	248010000	254770000	268480000	224210000
Q6IBS0	TWF2	Twinfilin-2	14	5214200000	261	300390000	249120000	292320000	210640000	290050000	267560000	319810000	265080000	288430000	311840000	257510000	244970000	297670000	254750000	288980000	324050000	388370000	317450000	333630000	311290000
Q8N1H4	TRA2B	Transformer-2 protein homolog beta	9	5203500000	185	251340000	228210000	249220000	238670000	240430000	257070000	285340000	217850000	285430000	215980000	287490000	220930000	245340000	224680000	302740000	283400000	285880000	336870000	364130000	241630000
Q6IAT9	PSMB6	Proteasome subunit beta type	8	5203400000	75	202670000	218120000	206060000	215630000	244360000	367890000	360050000	338130000	282150000	287750000	324770000	408130000	359820000	367950000	334000000	274740000	304490000	252800000	261290000	270160000
Q6FGS1	TPD52L2	Tumor protein D54	10	5177900000	163	341270000	343160000	348820000	333490000	356430000	304530000	312980000	320420000	294420000	377600000	247870000	253430000	228720000	233750000	230340000	225760000	271000000	207920000	238070000	222630000
Q13442	PDAP1	28 kDa heat- and acid-stable phosphoprotein	6	5170500000	146	265600000	276970000	251970000	256330000	280600000	326030000	278800000	303290000	237500000	293180000	309430000	351710000	285030000	291210000	274040000	305980000	352050000	236160000	323570000	311490000
Q8WW12	PCNP	PEST proteolytic signal-containing nuclear protein	5	5157400000	94	432240000	419620000	401750000	454290000	464130000	445820000	381240000	380050000	330890000	459800000	140770000	144220000	154910000	113540000	107660000	126150000	139140000	94203000	113130000	128140000
A0A0S2Z5I7	SBDS	Ribosome maturation protein SBDS	18	5153500000	192	346670000	355470000	356350000	357200000	346010000	228950000	220080000	253880000	238190000	280830000	352190000	356960000	333100000	358720000	354320000	192580000	201980000	166900000	170650000	179700000
A0A024R983	TROVE2	60 kDa SS-A/Ro ribonucleoprotein	19	5138600000	291	264800000	266910000	279300000	276490000	272810000	238400000	313660000	312760000	290230000	311140000	313620000	265990000	257000000	274590000	290590000	285300000	302490000	286310000	316880000	266040000
P31689	DNAJA1	DnaJ homolog subfamily A member 1	14	5138500000	214	374210000	390030000	404330000	412080000	392090000	273150000	259060000	233120000	296690000	269740000	221520000	229880000	230250000	217500000	222260000	249060000	229510000	235920000	162170000	285380000
Q6IBS5	DLST	Dihydrolipoyllysine-residue succinyltransferase component of 2-oxoglutarate dehydrogenase complex, mitochondrial	8	5137100000	139	313200000	305460000	341970000	291130000	319740000	264490000	217770000	311680000	272190000	243980000	233040000	324960000	282790000	326530000	253780000	280160000	254970000	373060000	344600000	283200000
P41227	NAA10	N-alpha-acetyltransferase 10	14	5105500000	194	341240000	362430000	328150000	360020000	358600000	363310000	362090000	410150000	312770000	377450000	212630000	220690000	189120000	190420000	177890000	168530000	186050000	153220000	159530000	224850000
A0A024R534	MTA2	Metastasis-associated protein MTA2	23	5102300000	262	276300000	278180000	282010000	290340000	310130000	298320000	273000000	272080000	273050000	317830000	222260000	257710000	254690000	266700000	217360000	353090000	346670000	289330000	278120000	339340000
E5KLM1	OPA1	Dynamin-like 120 kDa protein, mitochondrial	35	5092400000	367	147170000	90634000	130000000	65699000	100970000	48018000	146760000	111020000	129880000	25399000	446550000	425000000	477790000	514580000	520360000	437150000	450360000	673620000	511810000	472270000
A0A2R8Y7S2	SMARCA4	Transcription activator BRG1	38	5076300000	387	250900000	230760000	271700000	254360000	269390000	318680000	303940000	310110000	300910000	299370000	260510000	268200000	256290000	267880000	247490000	317880000	347410000	251690000	306240000	297360000
A0A024RB22	SMARCC2	SWI/SNF complex subunit SMARCC2	28	5053800000	344	238100000	241730000	243820000	234250000	255860000	258460000	291200000	281250000	250870000	311820000	265740000	238690000	267360000	273890000	275460000	319680000	320540000	348920000	368960000	303750000
Q5SQT9	SAR1A	GTP-binding protein SAR1a	8	5050900000	89	253760000	253320000	302910000	312630000	299790000	315750000	255010000	272940000	284480000	254070000	235560000	256320000	274240000	296130000	303550000	275620000	270710000	319100000	313350000	301510000
A0A024R0R4	SAE1	SUMO-activating enzyme subunit 1	15	5043600000	221	319960000	317700000	324570000	294130000	348840000	402220000	325650000	350770000	327090000	440060000	147910000	185220000	188370000	211240000	185020000	240570000	241730000	210760000	282770000	275290000
A0MNN4	SMU1	WD40 repeat-containing protein SMU1	15	5037900000	242	314390000	364340000	335980000	318940000	342200000	366280000	342450000	336380000	327570000	359930000	205040000	218690000	184700000	217780000	165180000	232950000	241090000	187520000	216650000	225320000
B4DT77	ANXA7	Annexin	16	5033700000	237	292000000	287170000	264040000	252720000	246600000	365280000	371870000	384730000	350580000	409220000	291730000	287470000	252390000	222860000	267910000	234620000	233970000	210820000	231350000	216700000
P43034	PAFAH1B1	Platelet-activating factor acetylhydrolase IB subunit alpha	16	5031500000	185	148140000	158850000	171930000	112070000	135810000	177240000	178410000	189630000	169470000	214080000	384430000	365340000	410220000	404130000	408630000	411410000	392150000	455360000	428350000	339860000
Q549N0	CFL2	Cofilin-2	12	5020100000	100	377150000	297460000	299640000	299100000	295980000	0	30905000	0	0	0	728190000	775900000	885340000	735260000	752710000	0	0	0	31039000	0
Q6P2E9	EDC4	Enhancer of mRNA-decapping protein 4	32	5003500000	362	323090000	309950000	353230000	329320000	337400000	327500000	315570000	337180000	302710000	320130000	215400000	230070000	237470000	233330000	215140000	257550000	219510000	194610000	205960000	244370000
Q86X55	CARM1	Histone-arginine methyltransferase CARM1	14	4983700000	243	179310000	139150000	164750000	100300000	193360000	171950000	209120000	168210000	177140000	214420000	341130000	413760000	334040000	384460000	358880000	439770000	495120000	400370000	414530000	453450000
P35580	MYH10	Myosin-10	76	4969800000	394	0	0	21919000	26713000	20862000	0	0	0	0	0	681700000	545370000	618860000	502730000	629710000	403920000	444270000	551680000	729250000	628270000
Q9HAV7	GRPEL1	GrpE protein homolog 1, mitochondrial	11	4937200000	177	299110000	279270000	269770000	291220000	300620000	281400000	218320000	265260000	245200000	213250000	277800000	293290000	321160000	317330000	287060000	278090000	280310000	323600000	322970000	271390000
O15400	STX7	Syntaxin-7	9	4924700000	145	197360000	214840000	220960000	179060000	229370000	0	0	0	0	0	437650000	457170000	483120000	498450000	454270000	443220000	419050000	510810000	482990000	427550000
Q99471	PFDN5	Prefoldin subunit 5	8	4921900000	164	266520000	267510000	280000000	252310000	290590000	296730000	281790000	272500000	236980000	310160000	283560000	305370000	257020000	277560000	281080000	243310000	281870000	251650000	282250000	296940000
Q53GF5	PSMA2	Proteasome subunit alpha type	10	4913900000	178	170410000	154670000	153650000	132890000	118410000	234730000	288600000	268710000	280480000	284590000	470310000	331710000	335900000	320970000	401800000	325630000	264240000	311100000	351940000	275730000
B4DLN1	SLC25A10	Mitochondrial dicarboxylate carrier	10	4912200000	120	381410000	367790000	367750000	278590000	312090000	365290000	275190000	302400000	344290000	196620000	235640000	251100000	269250000	221910000	244840000	200350000	193190000	186790000	184240000	185200000
A0A024RAH8	DDX18	ATP-dependent RNA helicase DDX18	15	4911900000	187	346190000	351440000	350010000	330770000	364380000	306520000	286860000	296890000	291080000	317560000	224450000	215840000	219460000	223870000	220090000	247370000	251950000	204020000	212700000	239530000
K7ER95	MAP4K1	Mitogen-activated protein kinase kinase kinase kinase	24	4898800000	303	274660000	290800000	336370000	308450000	296960000	257060000	264210000	248740000	201520000	269130000	253450000	264680000	267000000	262530000	265370000	248580000	265780000	319580000	282870000	271770000
V9HWJ8	HEL-S-283	Proteasome activator complex subunit 3	13	4898700000	237	308930000	335960000	340190000	314890000	307750000	250560000	289440000	192430000	289430000	281230000	259450000	261970000	273670000	300730000	305200000	275170000	228610000	147250000	139690000	292370000
Q53G58	CORO1C	Coronin	18	4896300000	191	146470000	145870000	118760000	123410000	146120000	70782000	133280000	105650000	117360000	118770000	600570000	580820000	434350000	482120000	513150000	314280000	291100000	409370000	458840000	302920000
A0A384MDU9	HEL-S-77	Dynactin subunit 2	17	4891500000	281	317350000	344180000	325060000	299930000	333200000	293110000	343300000	313780000	311090000	305240000	223420000	210790000	212310000	227820000	235540000	244730000	221780000	219610000	202870000	183690000
O95671	ASMTL	N-acetylserotonin O-methyltransferase-like protein	19	4889900000	327	318610000	312210000	293850000	270040000	314400000	266120000	270350000	292980000	289870000	313550000	266690000	242080000	229550000	236700000	236950000	288350000	226080000	202300000	237770000	211810000
V9HW56	HEL-S-108	Tropomyosin alpha-4 chain	20	4867500000	220	161910000	199600000	257060000	207890000	241840000	117310000	140580000	151070000	121060000	81731000	239630000	292170000	277720000	324580000	312500000	423110000	306850000	600680000	574010000	380120000
A0A087WZN1	IDH3B	Isocitrate dehydrogenase [NAD] subunit, mitochondrial	16	4865100000	222	229130000	260590000	265320000	226190000	270120000	179030000	163460000	234950000	277200000	205310000	314410000	306850000	325810000	317830000	341150000	246420000	248350000	252230000	251850000	246460000
R4GMR5	PSMD8	26S proteasome non-ATPase regulatory subunit 8	13	4861200000	197	254540000	287750000	271240000	277410000	220200000	304140000	252160000	252860000	258370000	270540000	293540000	311540000	300600000	288650000	276980000	282890000	286960000	262380000	270690000	281250000
B4DSH1	CDC5L	Cell division cycle 5-like protein	26	4856300000	346	273700000	315520000	286270000	297920000	309600000	273390000	270770000	268200000	310350000	293760000	261090000	264240000	258430000	237080000	233450000	283570000	303820000	198210000	231190000	246970000
A0A286MCJ2	HLA-DPA1		4	4851100000	97	0	0	0	0	81622000	0	0	0	0	0	576080000	569660000	542600000	552980000	589700000	527720000	580910000	561590000	474880000	636610000
K7EJ78	RPS15	40S ribosomal protein S15	4	4842100000	75	278030000	280980000	294480000	345860000	214480000	328580000	334080000	239800000	279760000	199680000	251990000	151180000	169540000	149460000	241280000	171310000	160950000	176670000	147060000	226730000
A0A087WZ13	RAVER1	Ribonucleoprotein PTB-binding 1	25	4833600000	297	242260000	213700000	231530000	287980000	264290000	270900000	251890000	245560000	266110000	246230000	267490000	244480000	277550000	288100000	255680000	351880000	341890000	277040000	329620000	298960000
A0A023T6R1	FLJ10292	Protein mago nashi homolog 2	7	4828100000	153	305230000	324440000	353880000	300990000	352150000	246970000	311930000	300790000	274370000	370290000	210210000	213700000	202830000	188940000	226070000	259810000	266600000	228560000	189300000	232250000
H3BLU7	AKR7A2	Aflatoxin B1 aldehyde reductase member 2	8	4826100000	162	107590000	84325000	123940000	114760000	121180000	208760000	228540000	242590000	189530000	231540000	443440000	354040000	375030000	341940000	360490000	368900000	391240000	370770000	534780000	386020000
O75340	PDCD6	Programmed cell death protein 6	11	4824600000	213	376600000	338820000	349470000	350610000	394680000	330080000	309510000	373130000	287780000	346690000	155190000	193470000	177620000	194790000	161470000	173440000	171060000	221600000	179570000	178960000
E7ENN3	SYNE1	Nesprin-1	8	4823900000	36	0	0	0	0	0	0	0	0	0	0	265700000	0	0	0	85277000	0	0	325340000	0	354470000
H7BXY3	DHX30	Putative ATP-dependent RNA helicase DHX30	39	4818800000	397	384800000	398700000	339350000	348490000	376140000	338580000	307320000	278150000	385880000	312820000	180710000	186680000	178260000	184480000	172200000	185080000	178190000	126920000	117520000	214690000
P62304	SNRPE	Small nuclear ribonucleoprotein E	3	4796700000	59	234110000	229730000	214470000	0	0	0	0	244400000	199090000	223240000	0	0	417790000	362850000	439280000	0	478920000	0	428730000	0
D3DWY7	VBP1	Prefoldin subunit 3	9	4795100000	141	243630000	266930000	261360000	273210000	257630000	294760000	218110000	256860000	220130000	303080000	266370000	280350000	262940000	284780000	297540000	312720000	320050000	243580000	284280000	280160000
A0A087X054	HYOU1	Hypoxia up-regulated protein 1	30	4789000000	405	255920000	278410000	244120000	218810000	269000000	258180000	246720000	170740000	259350000	190690000	308170000	309740000	354320000	299470000	334440000	292130000	263120000	293990000	279630000	300250000
A0A024R179	NCBP1	Nuclear cap-binding protein subunit 1	22	4780100000	325	215380000	228590000	206200000	207130000	247090000	227110000	200340000	200530000	224450000	224900000	315620000	299460000	308880000	305070000	326730000	355730000	343080000	275380000	294150000	394390000
Q9NYF8	BCLAF1	Bcl-2-associated transcription factor 1	11	4772500000	148	270130000	277760000	286840000	249030000	274010000	367900000	377580000	319610000	319620000	332010000	260440000	243130000	243770000	187730000	182470000	226290000	234890000	153770000	210100000	246170000
Q5T4S7	UBR4	E3 ubiquitin-protein ligase UBR4	73	4772000000	511	206270000	252290000	184690000	195590000	269880000	355350000	343810000	338260000	334810000	327400000	226000000	256480000	218780000	240490000	248690000	277010000	245030000	269870000	293150000	252620000
A0A0S2A4E4	AGL	Glycogen debranching enzyme	52	4766000000	427	147350000	177450000	175920000	156690000	186100000	148190000	186730000	168490000	158890000	194560000	443580000	386680000	367130000	391990000	411810000	333490000	337630000	431920000	360810000	311360000
Q9BV57	ADI1	1,2-dihydroxy-3-keto-5-methylthiopentene dioxygenase	11	4757800000	170	299110000	267840000	268940000	284330000	315130000	276190000	274970000	326010000	246080000	287780000	219210000	247770000	187920000	192780000	206390000	284950000	302740000	233730000	305180000	231420000
Q1AHP8			4	4741300000	7	0	0	0	0	0	0	0	0	0	0	0	0	373970000	0	0	0	0	0	0	0
P48739	PITPNB	Phosphatidylinositol transfer protein beta isoform	20	4728800000	281	311730000	305260000	321410000	289370000	302710000	265280000	272650000	246350000	253910000	300110000	246550000	233420000	222080000	203600000	217860000	239910000	250480000	218970000	264050000	274890000
Q9BV40	VAMP8	Vesicle-associated membrane protein 8	5	4721400000	120	287580000	273210000	214870000	279790000	317150000	240330000	225210000	189990000	223810000	172000000	276870000	259060000	198100000	232030000	188840000	233820000	212940000	176510000	234550000	360530000
P55160	NCKAP1L	Nck-associated protein 1-like	23	4715900000	308	176070000	158060000	165500000	173170000	181190000	199820000	211140000	260800000	209400000	215300000	358640000	289020000	334290000	276600000	323290000	335670000	329550000	363210000	386430000	315100000
A0A024R6S1	DNAJA2	DnaJ homolog subfamily A member 2	15	4710600000	282	215950000	339200000	251020000	286290000	231900000	365240000	236110000	222130000	297540000	321500000	193610000	176100000	186870000	167120000	167950000	169480000	197600000	157430000	153360000	204090000
Q9NUU7	DDX19A	ATP-dependent RNA helicase DDX19A	21	4710300000	184	390830000	423660000	363380000	384150000	386710000	259160000	305840000	283540000	324140000	316570000	167970000	163090000	177600000	175990000	135730000	181730000	191500000	149450000	144060000	222570000
P18583	SON	Protein SON	28	4699200000	249	325020000	304430000	306760000	334470000	326020000	336680000	305120000	331680000	278870000	332250000	183820000	200500000	207070000	199920000	190190000	214340000	220760000	198670000	203480000	225480000
P51970	NDUFA8	NADH dehydrogenase [ubiquinone] 1 alpha subcomplex subunit 8	8	4687300000	164	282120000	252120000	309170000	256240000	269820000	246390000	285440000	265450000	320450000	248360000	243150000	292500000	310140000	302750000	270960000	217710000	203080000	214700000	195930000	207340000
B4DY28	CSRP1	Cysteine and glycine-rich protein 1	8	4682500000	136	250240000	204430000	237980000	252160000	236360000	165900000	172280000	144830000	139930000	184690000	470460000	408520000	416860000	382850000	346570000	282820000	293210000	220060000	261730000	263840000
A0A024RDB0	UBE1L2	Ubiquitin-like modifier-activating enzyme 6	26	4680400000	351	276650000	273620000	257940000	283830000	278280000	306050000	282170000	314390000	286240000	336430000	212480000	233690000	219160000	237100000	207830000	261450000	270380000	262200000	272260000	234790000
O75937	DNAJC8	DnaJ homolog subfamily C member 8	9	4678700000	127	181560000	167130000	165290000	190010000	174670000	311590000	285590000	304620000	237180000	276890000	274780000	332510000	270640000	306680000	339310000	406270000	325800000	242470000	270030000	317180000
F8W7Q4	FAM162A	Protein FAM162A	5	4673800000	94	178820000	119160000	251140000	173100000	202840000	321400000	241650000	317150000	254980000	211060000	146300000	155640000	447880000	372850000	469690000	346770000	325610000	281020000	269780000	135530000
Q9H583	HEATR1	HEAT repeat-containing protein 1	47	4673300000	505	275860000	296130000	284930000	288550000	275800000	268130000	254000000	261030000	272140000	281050000	235480000	229450000	273070000	250430000	252780000	244750000	246230000	228560000	232770000	253340000
A6NHR9	SMCHD1	Structural maintenance of chromosomes flexible hinge domain-containing protein 1	47	4666300000	473	171420000	149390000	151160000	137450000	209310000	190440000	218600000	264180000	223850000	248210000	269180000	290940000	326920000	255000000	301510000	433010000	418410000	311310000	440230000	377360000
P04844	RPN2	Dolichyl-diphosphooligosaccharide--protein glycosyltransferase subunit 2	16	4661600000	249	233620000	210870000	229440000	230870000	226740000	282390000	206010000	219630000	248770000	147240000	224190000	208460000	321090000	284300000	312820000	299640000	262310000	476360000	339310000	360780000
B4DRA0	RBM39	RNA-binding protein 39	14	4660300000	184	257150000	236670000	244670000	228740000	234790000	184910000	243720000	245730000	283120000	269520000	237960000	228920000	289040000	252920000	294030000	327770000	323360000	265080000	293060000	307420000
A0A384NPN7	ALDH2	Aldehyde dehydrogenase, mitochondrial	22	4660100000	221	446170000	612030000	548830000	511420000	521110000	225170000	319230000	454470000	420560000	292820000	24493000	77477000	91504000	77702000	95596000	26734000	0	88709000	37522000	0
O60869	EDF1	Endothelial differentiation-related factor 1	4	4659100000	105	323330000	311890000	306610000	316300000	304090000	328210000	286220000	278600000	274650000	309590000	205790000	208390000	201560000	208880000	206350000	269530000	260600000	154580000	143650000	244460000
Q53FV3	COPS4	COP9 signalosome complex subunit 4	20	4656900000	299	276740000	271380000	280670000	263990000	270760000	249250000	212470000	254900000	228360000	260030000	291630000	281720000	258570000	276400000	279240000	234280000	253220000	275310000	262770000	238320000
G1UI16	PDS5A	Sister chromatid cohesion protein PDS5 homolog A	37	4641000000	413	248440000	257160000	287620000	268660000	301480000	320530000	287890000	282210000	287980000	316500000	186610000	200370000	215710000	218950000	206580000	242270000	233480000	208860000	234500000	254310000
A0A024R1Z6	VAT1	Synaptic vesicle membrane protein VAT-1 homolog	11	4640800000	179	278390000	281010000	308720000	288340000	296240000	246860000	271360000	280640000	248930000	295960000	257560000	262600000	253520000	234400000	251130000	236630000	214430000	221730000	233390000	184700000
A0A1S5UZ19	SEC31L1	Protein transport protein Sec31A	28	4634000000	275	249190000	295190000	271830000	282480000	299600000	282950000	280860000	308170000	229740000	299650000	231180000	251580000	228680000	217150000	249620000	250810000	238140000	235420000	251060000	277310000
P61086	UBE2K	Ubiquitin-conjugating enzyme E2 K	11	4618300000	163	281220000	269770000	271320000	280850000	294000000	249390000	263130000	234110000	225160000	299380000	305840000	248860000	285700000	293620000	253140000	229880000	282650000	203690000	217630000	204520000
Q9H8S9	MOB1A	MOB kinase activator 1A	8	4607500000	138	240150000	247110000	162250000	295250000	248990000	571340000	240840000	406590000	285880000	309720000	152030000	156600000	140670000	120730000	124550000	317640000	245460000	176320000	84548000	344990000
B2R514	COPS6	COP9 signalosome complex subunit 6	13	4601800000	214	242770000	302580000	236310000	257620000	266410000	263360000	225440000	236360000	197810000	241990000	317130000	273010000	294560000	274630000	294750000	270250000	257060000	229810000	258190000	241880000
O43818	RRP9	U3 small nucleolar RNA-interacting protein 2	14	4598600000	173	298980000	309250000	315600000	323810000	353720000	318270000	268380000	321750000	278350000	307270000	167190000	207650000	200830000	223720000	169950000	179640000	149130000	196310000	176150000	211690000
C9JYQ9	RPL22L1	60S ribosomal protein L22-like 1	3	4592600000	87	0	0	0	0	0	0	0	0	0	0	594090000	580050000	388120000	530800000	432200000	369890000	343030000	413400000	412420000	572570000
A0A0C4DGQ5	CAPNS1	Calpain small subunit 1	9	4588800000	176	242740000	258790000	218380000	257500000	259220000	244260000	215880000	291220000	217060000	268380000	209550000	236360000	216140000	248590000	246820000	222150000	227510000	256530000	262320000	212120000
Q9Y5L4	TIMM13	Mitochondrial import inner membrane translocase subunit Tim13	6	4569100000	106	435460000	352370000	350970000	340420000	361850000	257660000	229330000	232470000	272630000	225170000	193690000	211500000	217120000	204300000	205600000	201820000	189010000	187480000	146050000	199690000
B4DSN3	SEC24C	Protein transport protein Sec24C	21	4567800000	277	335050000	335410000	329700000	332200000	345270000	298730000	359180000	355450000	318030000	354630000	165770000	166040000	161880000	152580000	137250000	151700000	174780000	175050000	176650000	155580000
Q6IAU5	PPM1G	Protein phosphatase 1G	14	4558300000	230	295130000	306160000	309960000	299920000	331100000	301480000	315240000	264560000	299320000	285110000	241910000	211390000	204590000	198790000	213210000	211780000	197710000	138820000	157520000	251590000
A0A024R328	PRKCD	Protein kinase C delta type	26	4556600000	260	248000000	241680000	269330000	252710000	266790000	282860000	233470000	241400000	263480000	254220000	279670000	250470000	246650000	245160000	244770000	237010000	295480000	209040000	240660000	255680000
E9PBG7	CAMK2D	Calcium/calmodulin-dependent protein kinase type II subunit delta	16	4551200000	194	49106000	57099000	44967000	61487000	77437000	79340000	81443000	127090000	78887000	132410000	450090000	425900000	380160000	393100000	415380000	353480000	366250000	534960000	697920000	297730000
Q9H773	DCTPP1	dCTP pyrophosphatase 1	12	4549400000	195	272120000	279850000	260680000	262730000	257620000	206640000	195660000	215880000	163000000	210760000	282800000	259860000	269290000	266040000	263770000	308570000	322480000	248490000	268100000	321810000
B3KY11	DDX23	Probable ATP-dependent RNA helicase DDX23	29	4546500000	297	225320000	243150000	253280000	258520000	256880000	220200000	236000000	236820000	207140000	269520000	238580000	252380000	272380000	253300000	224140000	330210000	307170000	267600000	291290000	271620000
P23921	RRM1	Ribonucleoside-diphosphate reductase large subunit	24	4537600000	281	161250000	127560000	152890000	34661000	84251000	381260000	379090000	241510000	467720000	342850000	242800000	211010000	190560000	201340000	232350000	352730000	407930000	165710000	273130000	430420000
B4DE91	ALDH9A1	4-trimethylaminobutyraldehyde dehydrogenase	15	4514800000	205	266500000	267380000	255790000	266590000	296840000	218140000	175000000	210540000	192410000	235900000	262440000	304990000	293960000	338340000	300200000	235670000	237360000	282140000	291930000	224080000
Q59EH7			22	4510100000	240	290280000	312880000	261200000	308610000	294170000	324600000	300240000	247180000	297460000	268950000	203470000	211640000	163980000	191270000	169880000	229960000	196910000	140340000	154900000	201630000
A0A024QZY1	JTV1	Aminoacyl tRNA synthase complex-interacting multifunctional protein 2	10	4499100000	155	250570000	266890000	284440000	254550000	262370000	219420000	247460000	253840000	242250000	256740000	245560000	229250000	251630000	239330000	214990000	210890000	225150000	235990000	221000000	258830000
Q6IAL5	SUCLG1	Succinyl-CoA ligase [ADP/GDP-forming] subunit alpha, mitochondrial	7	4475700000	101	295240000	305790000	278090000	293110000	325360000	217510000	232950000	344990000	260630000	228490000	221770000	225970000	239810000	261310000	196940000	194440000	186600000	218840000	243170000	181370000
Q9NTI5	PDS5B	Sister chromatid cohesion protein PDS5 homolog B	39	4465000000	346	204270000	182680000	204000000	232860000	217840000	233400000	202300000	207500000	216880000	191420000	272440000	253430000	265640000	237540000	265780000	408240000	374350000	332610000	334340000	323360000
A0A024R861	PPP6C	Serine/threonine-protein phosphatase	10	4463000000	272	212860000	213170000	228400000	192510000	230630000	253730000	270730000	255440000	270590000	273390000	286200000	239480000	216130000	236270000	246390000	237860000	235920000	275980000	289880000	260560000
Q69YJ7	DKFZp667H197	RNA-binding protein 12	15	4458000000	193	254960000	260080000	237500000	259690000	249520000	298070000	256050000	273000000	243210000	283310000	220300000	225690000	252190000	215280000	205850000	248950000	233770000	223440000	239960000	230510000
U3PQT7	HLA-DRB1		9	4449800000	92	172460000	163890000	191840000	185580000	187010000	178760000	229540000	167880000	167990000	131820000	386630000	210810000	285270000	418230000	302040000	221050000	385760000	272800000	276570000	550860000
Q5T0G8	ANXA11	Annexin	20	4445900000	234	251690000	251340000	226750000	277820000	273850000	247050000	273370000	301580000	251980000	314640000	184170000	159720000	158550000	164580000	166510000	319580000	334650000	278690000	329840000	296750000
K7EM02	KATNAL2	Katanin p60 ATPase-containing subunit A-like 2	1	4440400000	26	0	0	0	0	0	0	0	0	0	0	0	0	0	0	0	0	0	0	0	200900000
E9PKP7	UBTF	Nucleolar transcription factor 1	17	4434100000	261	230470000	263400000	235040000	254250000	238590000	205480000	235420000	233160000	234210000	262910000	265770000	250530000	212700000	265180000	176500000	257780000	267500000	242340000	251210000	292440000
E7EQ69	NAA50	N-alpha-acetyltransferase 50	14	4430400000	220	303990000	287660000	290790000	308920000	301130000	291560000	298330000	234800000	264360000	292320000	158620000	138290000	178700000	164300000	214020000	191540000	206750000	138720000	129480000	183810000
A0A024R9G4	FAM49B	Protein FAM49B	13	4428600000	194	139930000	134320000	139070000	144520000	154990000	142660000	163870000	161490000	138770000	167080000	318180000	293350000	345210000	320030000	326850000	398080000	457710000	389630000	416540000	350050000
Q5TAL4	SNRPC	U1 small nuclear ribonucleoprotein C	2	4426600000	55	320370000	304770000	325970000	320470000	289110000	0	304480000	0	0	0	318870000	75939000	337250000	0	288210000	314980000	304160000	0	297750000	258030000
Q9NVI7	ATAD3A	ATPase family AAA domain-containing protein 3A	18	4421800000	215	214870000	211610000	239110000	245010000	210330000	285080000	195850000	272100000	283550000	136810000	230840000	245070000	294360000	277440000	266040000	256290000	240710000	362060000	250120000	399570000
Q99426	TBCB	Tubulin-folding cofactor B	7	4420100000	114	233250000	276620000	220800000	241960000	227390000	247600000	218230000	290730000	230260000	265960000	173510000	238050000	192810000	247680000	224080000	273060000	299400000	277780000	284110000	283620000
A8K132	GLS	Glutaminase kidney isoform, mitochondrial	17	4401600000	243	187590000	192410000	199280000	187320000	161120000	203430000	190740000	203940000	204660000	202040000	238310000	265500000	279420000	247160000	255410000	379170000	332800000	395810000	311310000	389600000
A0A090N7X1	ABCF2	ATP-binding cassette sub-family F member 2	21	4381500000	222	273800000	267960000	259010000	273660000	260730000	177810000	238130000	160530000	257950000	228140000	326590000	290500000	240360000	302240000	253400000	271170000	234840000	156760000	149790000	319530000
P56385	ATP5I	ATP synthase subunit e, mitochondrial	4	4380400000	62	273060000	218230000	268510000	247790000	260310000	222920000	0	256410000	0	293990000	245470000	294180000	306080000	298150000	274830000	269690000	278340000	323180000	236480000	287110000
Q9H4A4	RNPEP	Aminopeptidase B	23	4367100000	227	390220000	389650000	407580000	374160000	400970000	288710000	316570000	305350000	276130000	328460000	103200000	102400000	117870000	133230000	66055000	152900000	141260000	107490000	126210000	128150000
B4DZJ7	SUPT5H	Transcription elongation factor SPT5	29	4360600000	317	294560000	287930000	297860000	290480000	295590000	296230000	262580000	257440000	287140000	307670000	212230000	198600000	189390000	216030000	201660000	189460000	212720000	194000000	166920000	194050000
A0A3B3ISG5	IDE	Insulin-degrading enzyme	33	4354500000	329	267780000	290020000	285540000	264050000	286790000	266080000	246240000	178380000	223180000	195450000	243510000	261380000	252600000	287250000	263720000	273390000	229240000	207960000	194150000	221630000
A0A024R6D1	NEK9	Serine/threonine-protein kinase Nek9	25	4349400000	270	232720000	222520000	219340000	231040000	236050000	253350000	236260000	267570000	251060000	270090000	215460000	234920000	213180000	216810000	213110000	249800000	289630000	310820000	299550000	235600000
V9HWJ2	HEL-S-26	Isocitrate dehydrogenase [NADP]	18	4342500000	219	208860000	201150000	208670000	220750000	239710000	179620000	180170000	193120000	137600000	160690000	429360000	428300000	417660000	440020000	437680000	174000000	173070000	164090000	222760000	160680000
Q99986	VRK1	Serine/threonine-protein kinase VRK1	13	4336900000	189	218590000	234270000	226210000	215940000	234300000	297400000	278730000	238320000	285560000	288540000	229980000	254220000	249560000	244250000	241450000	236180000	261240000	181400000	202620000	267170000
P30085	CMPK1	UMP-CMP kinase	9	4335100000	208	208450000	190170000	205440000	242580000	232940000	259530000	225460000	264710000	311380000	257690000	206960000	191260000	196900000	187030000	212790000	229550000	256270000	235660000	248180000	228800000
Q9UPN7	PPP6R1	Serine/threonine-protein phosphatase 6 regulatory subunit 1	23	4325100000	325	207660000	219050000	216930000	213670000	228230000	284520000	292370000	265620000	284880000	262190000	200690000	220800000	205270000	209620000	176700000	207960000	240810000	209030000	232930000	189290000
A0A140VJT0	PPP2R2A	Serine/threonine-protein phosphatase 2A 55 kDa regulatory subunit B alpha isoform	12	4323100000	168	179140000	167360000	157750000	161950000	188330000	155470000	144500000	161060000	146710000	130280000	343360000	356400000	305710000	355760000	322340000	304080000	367040000	298320000	353840000	378230000
G5EA30	CELF1	CUGBP Elav-like family member 1	12	4315800000	204	241070000	277110000	267520000	287510000	275290000	293220000	260570000	364810000	290580000	294050000	197020000	196100000	158050000	175520000	150830000	160970000	168140000	155560000	168800000	162760000
A8K878	MANF	Mesencephalic astrocyte-derived neurotrophic factor	11	4307400000	155	259180000	292750000	250710000	246580000	261200000	229710000	203860000	193000000	191230000	205090000	224340000	247010000	270720000	293740000	251140000	241750000	235500000	201320000	270450000	250650000
P51665	PSMD7	26S proteasome non-ATPase regulatory subunit 7	12	4304200000	157	275630000	276760000	255030000	252760000	307750000	255110000	264350000	269250000	241490000	260080000	202650000	226440000	208380000	209450000	210380000	212060000	178280000	227390000	220870000	181010000
Q9H910	HN1L	Hematological and neurological expressed 1-like protein	8	4298700000	118	251100000	273140000	247890000	277720000	289120000	269280000	225950000	214710000	240990000	273390000	272030000	289230000	269710000	288270000	239110000	217360000	212010000	111780000	161920000	201640000
A0A2R8YD50	HSD17B4	Peroxisomal multifunctional enzyme type 2	20	4298400000	276	248470000	245880000	269620000	279880000	259820000	291090000	281620000	341750000	332970000	277650000	209250000	221540000	235290000	211820000	230080000	157500000	156790000	187260000	194160000	178860000
A0A024RA81	NT5C3	5-nucleotidase	17	4293800000	159	0	0	0	0	0	0	11419000	0	0	0	645330000	696500000	626680000	658750000	678420000	346660000	346530000	359240000	335950000	344780000
A8K607	XPO7	Exportin-7	35	4291600000	338	33106000	55263000	93655000	50187000	79947000	66356000	43160000	65604000	74764000	62373000	427290000	421950000	446610000	384350000	439610000	482220000	355240000	458510000	582480000	416420000
Q53F20	ANP32E	Acidic leucine-rich nuclear phosphoprotein 32 family member E	6	4284100000	126	190890000	197000000	195090000	192130000	179420000	252290000	242230000	271130000	250420000	293580000	229750000	219440000	271670000	242620000	224710000	323430000	320650000	215690000	271090000	247130000
Q8IWS0	PHF6	PHD finger protein 6	12	4278600000	149	244950000	233530000	271680000	268470000	273130000	244580000	278180000	295560000	288640000	320340000	178990000	197780000	150600000	167560000	157320000	137370000	191400000	145280000	154880000	157590000
A8K964	PNN	Pinin	14	4271700000	209	276400000	260430000	253470000	265080000	248750000	296170000	270400000	283260000	239990000	307550000	209760000	190670000	195280000	195180000	176590000	213350000	218010000	182850000	208190000	243040000
A0A024RB17	FAM62A	Extended synaptotagmin-1	32	4249900000	309	137890000	145390000	150070000	171400000	150820000	153970000	178640000	119930000	168170000	82302000	263110000	243350000	373410000	281520000	367610000	331170000	276100000	633670000	375420000	367300000
Q1HBJ4	MAPK1	Mitogen-activated protein kinase	18	4248400000	238	198680000	189940000	183780000	215030000	186360000	221750000	204030000	234040000	192850000	230910000	214700000	259020000	281900000	255190000	239070000	307470000	332960000	302900000	316580000	318410000
Q6FII1	LOC51064	Glutathione S-transferase kappa 1	9	4248000000	154	283700000	268910000	309080000	284170000	318570000	199530000	181810000	235130000	200360000	188990000	239850000	243400000	255070000	215530000	242820000	209680000	221220000	221370000	214230000	206580000
Q5RLJ0	C14orf166	UPF0568 protein C14orf166	15	4246000000	202	255770000	267930000	281140000	264780000	252250000	212940000	264980000	256430000	252360000	244770000	251560000	200810000	208500000	190740000	225630000	203340000	195700000	241830000	200740000	197030000
Q59GN2	RPL39P5	Putative 60S ribosomal protein L39-like 5	3	4244500000	49	210120000	201060000	0	168120000	211980000	200620000	234560000	0	0	0	294720000	263650000	308610000	314670000	289620000	256790000	311720000	0	310640000	291980000
E5KS95	TSFM	Elongation factor Ts, mitochondrial	14	4230400000	194	245730000	303170000	220770000	258380000	243300000	194550000	189970000	209440000	204080000	130630000	274420000	257600000	284130000	259390000	249480000	261160000	258240000	202310000	215840000	260330000
P42285	SKIV2L2	Superkiller viralicidic activity 2-like 2	26	4215500000	330	284990000	258550000	270880000	257850000	288010000	272920000	260970000	223350000	285070000	257570000	196930000	196580000	207380000	186370000	185970000	206020000	206040000	173480000	155830000	233320000
A0A024R4G1	LRRC47	Leucine-rich repeat-containing protein 47	20	4213000000	293	307920000	302050000	303420000	281910000	337880000	297900000	291120000	309630000	293860000	289270000	159220000	137070000	142350000	149260000	133090000	131340000	134030000	131990000	135870000	117160000
Q6IB98	EIF3S3	Eukaryotic translation initiation factor 3 subunit H	15	4207700000	166	181110000	209780000	203920000	219890000	196180000	193830000	203350000	175970000	193330000	108610000	284570000	319120000	293720000	274170000	345090000	260460000	290970000	335870000	266090000	276600000
O60343	TBC1D4	TBC1 domain family member 4	44	4205900000	195	0	0	0	0	0	0	0	0	0	0	1051800000	1000900000	947370000	940160000	959880000	0	0	0	0	0
A0A0S2Z4C3	FH	Fumarate hydratase, mitochondrial	13	4204400000	200	304470000	290170000	289840000	258420000	288930000	308100000	293790000	329070000	331040000	311680000	136450000	114020000	126770000	148640000	161960000	153270000	147160000	139190000	178280000	129300000
Q7Z726	KPNA2	Importin subunit alpha	15	4196900000	217	452900000	484500000	399560000	351450000	392330000	322380000	203010000	142270000	313780000	224380000	128260000	157280000	78946000	127750000	102000000	125340000	40094000	64936000	0	252820000
D6W4Z6	hCG_23833	Ribonucleoside-diphosphate reductase subunit M2	16	4196700000	190	235860000	259640000	229750000	230620000	225870000	368090000	323170000	145540000	337610000	301860000	156440000	153960000	126080000	139320000	129210000	391690000	323480000	65544000	99012000	461660000
Q86U42	PABPN1	Polyadenylate-binding protein 2	10	4172900000	145	272350000	246130000	240240000	239780000	237970000	263650000	289390000	250440000	230440000	239930000	228280000	227130000	225410000	204430000	193650000	248280000	224720000	205300000	217380000	230580000
A0A024R830	IMPA1	Inositol monophosphatase 1	10	4164200000	166	238690000	245170000	251780000	223030000	256050000	291230000	280520000	315780000	226690000	346620000	185850000	226490000	212810000	213750000	180860000	196300000	179600000	181740000	179630000	167160000
A4D1N4	CHCHD3	MICOS complex subunit MIC19	7	4159700000	120	251350000	240610000	267460000	253410000	275330000	274210000	221920000	296920000	295480000	228040000	164090000	177930000	206410000	190530000	195200000	193000000	140430000	266530000	229990000	206760000
O43324	EEF1E1	Eukaryotic translation elongation factor 1 epsilon-1	9	4157300000	156	215380000	225450000	199630000	228260000	210220000	174320000	165490000	182660000	175690000	160300000	274840000	247480000	258790000	252870000	260360000	307420000	287270000	290560000	294230000	314810000
Q6IAX1	FDFT1	Squalene synthase	16	4147500000	175	59879000	36363000	15540000	59533000	0	0	0	40641000	10197000	0	714300000	289310000	453190000	652340000	626300000	405220000	257890000	550750000	460050000	271190000
Q13428	TCOF1	Treacle protein	19	4141700000	234	254580000	295040000	258620000	284020000	292910000	364660000	273550000	341160000	246760000	288030000	185890000	223690000	139160000	177330000	140310000	128640000	139490000	143170000	158560000	189810000
A0A024RDV7	KPNA3	Importin subunit alpha	18	4122000000	240	179990000	226740000	174910000	233620000	189690000	204270000	211910000	207530000	204010000	178230000	230820000	198370000	214960000	206500000	248420000	246790000	272540000	242230000	233780000	268810000
A5YKK6	CNOT1	CCR4-NOT transcription complex subunit 1	49	4115900000	402	259440000	270820000	261080000	270540000	262130000	189510000	251550000	262720000	238460000	269290000	212730000	229220000	194390000	189350000	215500000	210690000	234170000	174630000	165850000	198500000
A0A024RAE4	CDC42	Cell division control protein 42 homolog	7	4098000000	129	154850000	123730000	106770000	147880000	133490000	167140000	195710000	152570000	169030000	111620000	301720000	231530000	256360000	268670000	290550000	246310000	263770000	374680000	360290000	345080000
Q8N4P8	GTPBP4	Nucleolar GTP-binding protein 1	20	4083900000	288	247340000	270390000	265170000	290050000	264310000	279670000	279170000	252960000	290590000	284030000	161150000	181260000	161130000	150670000	151340000	194140000	198040000	188610000	148060000	223490000
P16402	HIST1H1D	Histone H1.3	8	4077000000	25	0	0	0	0	0	0	0	0	0	0	0	0	0	0	0	0	0	0	220920000	0
A0A024R4F4	POLD1	DNA polymerase	34	4069900000	336	269540000	300800000	291490000	293480000	311820000	322120000	272450000	273930000	285500000	306850000	151470000	154910000	141370000	128260000	126740000	217410000	222720000	87095000	131090000	210640000
Q14232	EIF2B1	Translation initiation factor eIF-2B subunit alpha	13	4069000000	210	278670000	292720000	298000000	295450000	268640000	261080000	203600000	210090000	187410000	232280000	194840000	210240000	170240000	199550000	184130000	177810000	187040000	180840000	180930000	199600000
A0A384MR44	ECH1	Delta(3,5)-Delta(2,4)-dienoyl-CoA isomerase, mitochondrial	10	4065600000	118	68722000	102990000	104460000	100840000	116760000	64929000	0	101610000	125120000	0	354210000	344090000	430670000	363700000	374270000	371380000	397760000	535540000	564410000	282740000
Q96IX5	USMG5	Up-regulated during skeletal muscle growth protein 5	4	4060500000	58	259970000	220030000	255140000	281950000	255420000	270100000	194380000	269200000	280160000	0	222250000	204120000	0	270040000	219290000	198690000	190640000	288700000	209550000	249110000
Q96HE7	ERO1L	ERO1-like protein alpha	20	4051700000	217	210490000	211600000	226970000	217530000	220880000	335240000	315930000	355910000	283250000	301520000	154930000	140300000	142020000	146740000	154580000	202100000	196190000	256590000	237170000	187890000
J3QQM5	LIMD2	LIM domain-containing protein 2	3	4048100000	66	486240000	404800000	172700000	406190000	431460000	252740000	199200000	187780000	215610000	273490000	174980000	169540000	110850000	145380000	136100000	123300000	152160000	100160000	116760000	155700000
Q9H444	CHMP4B	Charged multivesicular body protein 4b	6	4040300000	93	251500000	281670000	273270000	245520000	254530000	314920000	307060000	337920000	291140000	289820000	137590000	94250000	128400000	115570000	169300000	185400000	192160000	159260000	77374000	191010000
P0DN76	U2AF1	Splicing factor U2AF 35 kDa subunit	7	4038600000	142	235990000	250030000	252590000	231760000	221370000	194550000	259230000	213490000	219220000	206120000	209490000	226070000	214710000	230430000	227400000	220750000	212500000	213760000	228660000	164660000
Q6FHU0	PSMB8	Proteasome subunit beta type	10	4031400000	158	237580000	221570000	208810000	213350000	212380000	379970000	385130000	410890000	326620000	427830000	112470000	112980000	116170000	125820000	63239000	170300000	161940000	188340000	239140000	126500000
Q92621	NUP205	Nuclear pore complex protein Nup205	40	4027900000	368	201930000	203100000	183500000	213520000	185740000	225920000	223920000	225860000	213450000	193990000	207200000	214450000	247910000	232310000	232970000	280320000	270010000	261830000	207310000	276040000
C9JFE4	GPS1	COP9 signalosome complex subunit 1	11	4020200000	217	220470000	234830000	248470000	236350000	235500000	181160000	204570000	206150000	187190000	204530000	246870000	268920000	228880000	227350000	219520000	219080000	227370000	220390000	199870000	209660000
P35250	RFC2	Replication factor C subunit 2	14	3993100000	169	206270000	244330000	219980000	241440000	240130000	255740000	239980000	233280000	258810000	238670000	183290000	170170000	174640000	163980000	188630000	282760000	281240000	130780000	186830000	269610000
P42566	EPS15	Epidermal growth factor receptor substrate 15	28	3982900000	332	218860000	217760000	227920000	220160000	217140000	226750000	241280000	271660000	217450000	257940000	242630000	209660000	210690000	210890000	231630000	211810000	220520000	194080000	221720000	202070000
A0A024R8A7	hCG_31253	Far upstream element-binding protein 3	18	3980400000	222	306790000	301560000	276010000	268160000	321850000	238950000	231910000	280730000	260740000	267740000	169490000	149390000	158180000	167160000	167100000	141590000	155050000	122370000	157170000	162440000
A0A024RBE7	TMPO	Lamina-associated polypeptide 2, isoforms beta/gamma	17	3980400000	126	231190000	149620000	262020000	194180000	193470000	260320000	244160000	249170000	220340000	160690000	190760000	179360000	187850000	209660000	185170000	243540000	266200000	279460000	283250000	307410000
Q15020	SART3	Squamous cell carcinoma antigen recognized by T-cells 3	34	3977300000	349	160630000	157780000	132050000	139900000	171260000	174280000	159650000	188870000	181500000	157840000	264910000	244540000	247740000	288850000	281170000	325380000	326640000	349950000	283390000	311390000
B4DRA5	SEC23B	Protein transport protein Sec23B	25	3968900000	285	244410000	227230000	234470000	233850000	239830000	237920000	272560000	261860000	252200000	256300000	195440000	172730000	167950000	191240000	179780000	209590000	196540000	207460000	191310000	192100000
Q7L2H7	EIF3M	Eukaryotic translation initiation factor 3 subunit M	16	3967500000	273	183550000	181130000	185480000	170460000	162660000	190300000	235310000	172370000	212270000	189050000	264480000	213910000	241890000	233020000	312370000	242280000	276770000	241190000	256120000	243400000
Q2TSD2	TIAL1	Nucleolysin TIAR	8	3965400000	176	221650000	247260000	210450000	253250000	228650000	257960000	262640000	251460000	231840000	257550000	200680000	209330000	184050000	209770000	185570000	227140000	233120000	169710000	171850000	235640000
H0Y8X4	DNPH1	2-deoxynucleoside 5-phosphate N-hydrolase 1	6	3960300000	112	387510000	354040000	361430000	395440000	378470000	221810000	206000000	202880000	175050000	246590000	102430000	120500000	89044000	109100000	125370000	130630000	119260000	132200000	181570000	101870000
V9HWI1	HEL-S-10	Flavin reductase (NADPH)	9	3959200000	193	255090000	227430000	191110000	215120000	200700000	160530000	157880000	205350000	222470000	174280000	145690000	200870000	205580000	183120000	187980000	168550000	174610000	217760000	189320000	127030000
Q8IY81	FTSJ3	pre-rRNA processing protein FTSJ3	14	3945600000	225	289200000	268850000	301640000	273440000	301400000	278370000	267600000	271200000	301320000	278220000	134870000	144000000	146440000	130490000	124210000	165160000	157990000	161420000	160630000	159500000
A0A024RD47	NCOR1	Nuclear receptor corepressor 1	18	3945300000	71	365190000	395520000	0	448370000	0	346890000	406900000	441240000	324110000	0	0	0	0	0	0	278620000	0	0	0	0
A0A0S2Z5H3	CLINT1	Clathrin interactor 1	19	3944800000	205	210110000	203950000	172470000	195690000	207480000	211550000	207600000	230180000	189450000	204940000	259870000	284820000	246040000	312250000	239850000	267840000	247520000	196260000	209370000	198410000
P35249	RFC4	Replication factor C subunit 4	14	3931200000	175	206370000	220610000	237470000	221930000	235030000	231940000	237780000	212200000	254650000	260930000	183400000	166190000	202120000	190380000	160320000	278030000	285710000	110130000	176680000	293090000
B5MCF9	PES1	Pescadillo homolog	15	3926000000	211	290120000	265570000	266160000	283460000	240890000	231480000	221520000	163530000	225110000	184930000	192160000	215350000	223290000	196310000	157920000	200370000	187410000	182650000	162340000	249980000
Q9UJZ1	STOML2	Stomatin-like protein 2, mitochondrial	14	3909100000	222	233960000	257900000	272940000	244510000	223820000	228940000	229630000	266490000	285030000	201670000	155860000	140060000	180320000	180110000	194240000	205480000	182630000	254130000	241740000	168910000
Q13867	BLMH	Bleomycin hydrolase	10	3902500000	146	227690000	208140000	212190000	209990000	213580000	190310000	217770000	217690000	184990000	247160000	190410000	214860000	218030000	245130000	210020000	210250000	234820000	249080000	205580000	212330000
B1ANR0	PABPC4	Polyadenylate-binding protein	24	3897500000	166	190380000	217830000	191320000	210980000	216070000	244270000	234410000	204050000	216510000	233020000	245130000	294110000	225050000	257230000	222590000	226350000	230360000	161810000	158280000	234950000
A0MNP2	WDR57	U5 small nuclear ribonucleoprotein 40 kDa protein	15	3896500000	206	190320000	192450000	177410000	205520000	203470000	220760000	188630000	214620000	210660000	250070000	200980000	190370000	227070000	225870000	202070000	228910000	260500000	221500000	192640000	239550000
A0A024QYX8	WAS	Wiskott-Aldrich syndrome protein	14	3881700000	198	172040000	173630000	166800000	185740000	217330000	226560000	246550000	238630000	213740000	259680000	191160000	217200000	194140000	218900000	186840000	238170000	286550000	256890000	268820000	217550000
Q6I9S2	SNW1	SNW domain-containing protein 1	20	3878400000	274	228540000	216760000	211170000	248010000	230170000	251910000	252460000	234060000	219720000	238580000	202970000	198760000	201930000	180870000	194820000	190560000	215220000	149450000	196780000	220070000
Q9NYB0	TERF2IP	Telomeric repeat-binding factor 2-interacting protein 1	16	3869500000	194	239130000	228390000	216140000	223560000	237290000	237740000	200430000	204170000	188140000	231970000	216290000	238500000	202020000	212490000	169230000	199290000	232660000	208760000	254140000	230450000
Q6IBH0	SLC25A11	Mitochondrial 2-oxoglutarate/malate carrier protein	14	3865300000	181	173690000	148460000	202620000	181080000	194560000	197310000	138350000	163980000	157110000	127100000	235980000	229570000	303470000	287800000	274420000	215590000	190530000	408250000	280090000	219180000
Q12788	TBL3	Transducin beta-like protein 3	23	3864200000	275	269120000	266280000	287110000	282720000	258440000	230850000	223450000	210880000	246710000	222910000	185460000	183510000	193490000	165460000	173830000	193480000	162550000	150830000	147500000	197700000
P05107	ITGB2	Integrin beta-2	17	3828800000	144	504700000	387520000	412710000	392220000	475630000	477230000	271250000	311240000	427030000	296570000	0	0	31977000	23390000	0	0	0	0	0	0
B3KNC3	NOC2L	Nucleolar complex protein 2 homolog	19	3827700000	216	235480000	237740000	224450000	230590000	276970000	243010000	178080000	217100000	214550000	241610000	186770000	181740000	170210000	169580000	169240000	181810000	178670000	185230000	179710000	202540000
A0A0S2Z5V7	HM13	Minor histocompatibility antigen H13	5	3810800000	92	402110000	339590000	348920000	411930000	368820000	426350000	296580000	305160000	342360000	187410000	52103000	61551000	79318000	87451000	82540000	64054000	53671000	93137000	0	79394000
A0A024RDH2	UBE2D3	Ubiquitin-conjugating enzyme E2 D3	3	3808700000	39	265490000	143930000	243450000	179490000	243900000	0	0	0	326830000	242200000	311980000	178510000	219450000	221150000	297610000	225310000	0	318480000	0	235020000
Q53GX4	FKBP5	Peptidyl-prolyl cis-trans isomerase FKBP5	24	3808500000	227	217340000	229700000	199270000	204050000	203340000	232020000	189660000	204300000	206180000	190650000	244330000	199190000	191790000	192410000	208570000	239110000	256830000	200180000	235510000	237850000
A8KAK1	UGGT1	UDP-glucose:glycoprotein glucosyltransferase 1	35	3806800000	329	284170000	288790000	277760000	264760000	324090000	260990000	249110000	281290000	259580000	252500000	91915000	30118000	92671000	86656000	69274000	174520000	190720000	252780000	237980000	194400000
B4E106			4	3798700000	80	331010000	301680000	322010000	355400000	391880000	374610000	305780000	289970000	350470000	251810000	82090000	0	74953000	0	88577000	43342000	75654000	0	93317000	168890000
O00154	ACOT7	Cytosolic acyl coenzyme A thioester hydrolase	11	3788900000	203	300620000	274360000	331650000	268770000	302190000	251090000	289490000	272680000	269240000	293700000	132910000	142930000	110300000	131320000	115000000	125740000	141860000	105910000	111180000	130770000
Q6IAW5	CALU	Calumenin	12	3767400000	132	178670000	177190000	110130000	211850000	57637000	190640000	131120000	140400000	163800000	0	250630000	239880000	361360000	358360000	347260000	263980000	300080000	338970000	246290000	230650000
E5RGS4	PFDN1	Prefoldin subunit 1	6	3762500000	99	214310000	250820000	243050000	241600000	256910000	234710000	263420000	282270000	214290000	278180000	231130000	220860000	132980000	243780000	190650000	152660000	110640000	155100000	162690000	150390000
Q9H3N1	TMX1	Thioredoxin-related transmembrane protein 1	9	3755600000	134	205950000	211790000	193610000	187230000	202290000	240290000	172540000	179010000	204560000	141680000	176360000	228280000	239450000	237520000	206690000	227580000	221640000	293480000	239980000	283560000
Q96HS1	PGAM5	Serine/threonine-protein phosphatase PGAM5, mitochondrial	15	3746600000	185	183490000	162080000	176160000	202680000	190100000	201610000	158060000	209450000	236250000	219160000	210690000	229550000	233580000	267160000	235040000	233070000	257230000	184460000	224930000	265110000
Q9H6Z4	RANBP3	Ran-binding protein 3	12	3744100000	130	206860000	243560000	233480000	221420000	237830000	245640000	265650000	273660000	212720000	256130000	158010000	215070000	183910000	195150000	160990000	201450000	199400000	136280000	166840000	168240000
P20290	BTF3	Transcription factor BTF3	9	3724700000	141	140430000	240010000	172000000	193570000	0	0	144660000	114110000	90275000	0	322820000	259900000	306080000	264710000	383400000	313880000	256330000	303640000	225580000	329740000
A0A024R6D8	SFRS5	Serine/arginine-rich splicing factor 5	7	3720700000	143	164540000	159570000	131010000	128040000	132180000	119090000	142720000	121720000	111260000	196740000	96434000	125160000	221430000	208690000	210170000	236520000	185280000	204840000	213890000	147390000
A6NFX8	NUDT5	ADP-sugar pyrophosphatase	11	3719200000	149	176590000	174140000	164170000	179430000	179370000	186860000	165150000	173360000	158310000	174130000	209070000	234880000	219780000	227610000	213060000	329600000	302720000	251250000	268170000	334410000
A0A087WW23	ALOX5AP	Arachidonate 5-lipoxygenase-activating protein	4	3705200000	44	200960000	191860000	0	0	147770000	210300000	236200000	241800000	255380000	118500000	179230000	182460000	278250000	246400000	202930000	0	310750000	498590000	344320000	283510000
P56134	ATP5J2	ATP synthase subunit f, mitochondrial	4	3688000000	104	188960000	177170000	222220000	201280000	173210000	168750000	182970000	173310000	195680000	114180000	219630000	187780000	254550000	222560000	263990000	213390000	186910000	315290000	217150000	298030000
A4D275	ARPC1B	Actin-related protein 2/3 complex subunit 1B	16	3686100000	87	171220000	177810000	184190000	171710000	176440000	177970000	192530000	164440000	169530000	165990000	319020000	232820000	0	287250000	278400000	0	292390000	266420000	283830000	247960000
Q6L8Q7	PDE12	2,5-phosphodiesterase 12	17	3667300000	215	253370000	247550000	255720000	244290000	244040000	183950000	177190000	205800000	205140000	208940000	212260000	214050000	195600000	195600000	200830000	174420000	144830000	177570000	158360000	175040000
O15042	U2SURP	U2 snRNP-associated SURP motif-containing protein	23	3667200000	223	229220000	147200000	156350000	92271000	148690000	233280000	206450000	101000000	187500000	208500000	226760000	230970000	291310000	248340000	235190000	244920000	315370000	176950000	235350000	247030000
Q14289	PTK2B	Protein-tyrosine kinase 2-beta	44	3663600000	255	0	0	0	0	0	0	0	0	0	0	417000000	415070000	411780000	445210000	456090000	378700000	436240000	484240000	535210000	407900000
A0A024QZ77	EFHD2	EF-hand domain-containing protein D2	12	3660800000	192	132070000	161160000	44403000	128250000	131250000	253380000	185950000	235270000	186590000	175420000	166830000	219220000	148290000	207250000	178900000	251050000	246970000	229550000	233110000	391340000
P63208	SKP1	S-phase kinase-associated protein 1	7	3653600000	112	266450000	245730000	249170000	210890000	229450000	210490000	210770000	165200000	224860000	219800000	182050000	147710000	164350000	170520000	175570000	173890000	165030000	161040000	146730000	189390000
E9PIR7	TXNRD1	Thioredoxin reductase 1, cytoplasmic	20	3652600000	271	256600000	260940000	222290000	232110000	217770000	193760000	225410000	201260000	189970000	220970000	222660000	197330000	180180000	165540000	190120000	194820000	160250000	125750000	154350000	159070000
Q6IB29	EBNA1BP2	Probable rRNA-processing protein EBP2	10	3651800000	176	273130000	292610000	313840000	342940000	305240000	258070000	218300000	202020000	219540000	240010000	127610000	113580000	128110000	127390000	111730000	156580000	128170000	132750000	132410000	155810000
K7EK07	H3F3B	Histone H3	6	3650600000	37	42211000	0	0	0	0	0	25496000	0	192620000	0	398740000	182720000	265560000	107090000	500400000	348600000	141660000	1114800000	693200000	220350000
Q496I0	COX7A2	Cytochrome c oxidase subunit 7A2, mitochondrial	2	3638000000	39	281050000	269480000	289830000	282710000	279070000	259480000	219740000	0	263990000	179150000	182730000	190980000	222380000	205740000	201250000	113670000	106710000	142190000	112860000	125400000
A0A2X0U2E5	HMHA1	Minor histocompatibility protein HA-1	24	3637400000	230	0	28332000	21737000	0	32815000	0	0	0	0	23262000	309990000	422380000	347350000	379360000	386950000	460680000	422650000	589110000	467010000	379280000
Q9Y6G9	DYNC1LI1	Cytoplasmic dynein 1 light intermediate chain 1	16	3629900000	174	185310000	191780000	199590000	216290000	208200000	299060000	221230000	239920000	191870000	255410000	171330000	175380000	165130000	192050000	194770000	180930000	178840000	182560000	210520000	198240000
J3QRS9	ZNF207	BUB3-interacting and GLEBS motif-containing protein ZNF207	5	3627900000	78	210310000	208100000	205020000	204390000	205450000	245470000	187420000	188180000	173790000	214750000	161990000	187050000	214980000	203000000	197000000	209070000	219770000	185540000	186050000	249560000
Q9UPE4	hTIM44	Mitochondrial import inner membrane translocase subunit TIM44	20	3625700000	221	169620000	176730000	161870000	165400000	184050000	155010000	149520000	181310000	154780000	163440000	245190000	254290000	275270000	277800000	263100000	239380000	227060000	271360000	240640000	205240000
G3V0I5	NDUFV1	NADH dehydrogenase [ubiquinone] flavoprotein 1, mitochondrial	17	3615800000	202	203400000	210940000	267810000	178010000	220490000	222880000	166750000	225370000	236740000	176250000	213730000	233310000	259230000	252480000	211910000	158530000	175120000	162620000	140890000	140050000
A4D1X5	ELMO1	Engulfment and cell motility protein 1	24	3609500000	226	0	0	0	13499000	11927000	33403000	29984000	61563000	15138000	40319000	482210000	374300000	264330000	435450000	383430000	402490000	271910000	512730000	493510000	243970000
Q53GE2	CAPZA2	F-actin-capping protein subunit alpha-2	12	3608100000	201	110730000	89772000	124330000	128560000	89239000	170840000	201890000	160840000	158410000	173710000	280950000	237530000	220390000	268180000	249850000	296650000	305280000	279760000	343190000	255750000
A0A2Z4T009	ATOX1	Copper transport protein ATOX1	4	3599800000	81	199530000	148000000	168270000	211320000	200930000	137930000	127180000	87183000	118720000	131040000	368710000	300160000	265950000	232140000	301460000	276280000	229710000	139370000	170430000	253780000
Q6LES8	TFAM	Transcription factor A, mitochondrial	10	3599200000	140	169260000	201490000	204550000	192190000	204900000	175990000	173280000	225990000	225610000	179740000	231100000	243890000	197340000	213460000	199210000	206000000	187120000	226460000	225220000	188180000
A0A024QZN2	hCG_2024613	DnaJ homolog subfamily C member 9	11	3598200000	187	273880000	257010000	246280000	233230000	258230000	268300000	219370000	246240000	210080000	277520000	112990000	94728000	93774000	100220000	85915000	179080000	169900000	92478000	137440000	159610000
A8KA19	XPOT	Exportin-T	27	3595400000	276	90750000	111070000	94594000	96897000	120570000	63584000	119690000	127460000	71077000	101720000	347060000	299740000	311610000	301920000	351280000	368680000	319280000	322450000	287180000	264230000
B3KXW5	AP1G1	AP-1 complex subunit gamma-1	24	3591900000	254	191290000	203340000	189620000	181150000	205670000	201620000	203830000	200930000	211040000	215850000	225370000	220970000	220590000	183850000	204630000	202890000	194430000	190300000	201070000	177390000
A0A140VJK7	HDDC2	HD domain-containing protein 2	10	3590600000	139	240310000	225140000	213870000	258250000	226560000	228350000	239670000	249890000	185960000	250720000	132490000	165450000	161350000	160710000	148920000	153170000	177290000	175270000	187860000	136700000
A0A087WY55	VTA1	Vacuolar protein sorting-associated protein VTA1 homolog	10	3590400000	153	122390000	125140000	116420000	127180000	112830000	223490000	262510000	279390000	223100000	255050000	216640000	200340000	202010000	216700000	208390000	227350000	238770000	237350000	248900000	230660000
A0A0S2Z4I9	VASP	Vasodilator-stimulated phosphoprotein	11	3588200000	190	140230000	146900000	158750000	145150000	139300000	194870000	229530000	296050000	221880000	243860000	266530000	250850000	186820000	228480000	199620000	193130000	170020000	218860000	211730000	175210000
A8K548	PELP1	Proline-, glutamic acid- and leucine-rich protein 1	21	3568500000	262	207520000	204970000	203600000	212190000	226840000	179250000	175260000	206540000	219720000	213640000	189640000	186710000	176030000	180430000	152690000	180070000	176660000	172750000	165960000	192170000
P54709	ATP1B3	Sodium/potassium-transporting ATPase subunit beta-3	9	3563800000	186	216180000	220500000	232170000	221480000	223520000	243010000	198120000	176890000	232110000	132230000	163620000	154810000	188380000	209750000	221050000	199350000	196620000	160560000	156420000	249350000
Q4G0N4	NADK2	NAD kinase 2, mitochondrial	14	3561800000	163	339910000	340200000	320030000	313130000	362620000	184750000	162240000	238100000	218900000	172440000	137790000	153070000	142720000	178250000	152380000	76710000	67397000	108830000	122390000	80087000
A0A3F2YNY6	PRPF40A	Pre-mRNA-processing factor 40 homolog A	17	3549600000	177	241680000	213030000	225660000	218550000	248680000	227500000	202940000	203400000	223100000	277690000	154100000	159530000	143710000	137110000	137200000	173140000	224590000	177990000	206890000	180800000
O43252	PAPSS1	Bifunctional 3-phosphoadenosine 5-phosphosulfate synthase 1	15	3547700000	200	237080000	221150000	217990000	206980000	213780000	211630000	189960000	231400000	212230000	225490000	158930000	168730000	115230000	178540000	170550000	218440000	231540000	98601000	176940000	212510000
A0A024R8T9	SYNGR2	Synaptogyrin	5	3547000000	61	174440000	163840000	166670000	171930000	189520000	169830000	158180000	164810000	133890000	149530000	221450000	267580000	268230000	272870000	262520000	182540000	172120000	289680000	298730000	228190000
Q9H6T3	RPAP3	RNA polymerase II-associated protein 3	19	3541400000	263	206790000	208140000	212520000	210040000	231900000	206310000	216240000	214190000	212870000	213760000	170430000	194970000	172430000	199500000	185620000	229400000	204210000	121650000	140170000	233370000
C9J2Y9	POLR2B	DNA-directed RNA polymerase	28	3532400000	326	246040000	241330000	243580000	255460000	250290000	202250000	203940000	195770000	203440000	210230000	166660000	175420000	153880000	155880000	164010000	164470000	163990000	170470000	149860000	179840000
B4DRR0	KRT6A	Keratin, type II cytoskeletal 6A	29	3474300000	97	280560000	0	26051000	88450000	105240000	343940000	119770000	0	63347000	0	41669000	330100000	164280000	0	54228000	0	56972000	2283600000	0	101450000
P14854	COX6B1	Cytochrome c oxidase subunit 6B1	5	3468300000	160	255930000	228770000	259720000	248220000	206140000	134610000	123060000	159350000	177830000	164370000	223020000	175000000	234600000	234520000	213830000	133000000	137020000	142060000	132290000	169760000
A0A0A0MTB8	WDR36	WD repeat-containing protein 36	28	3465100000	281	212840000	228660000	226810000	227080000	220480000	153850000	197140000	202430000	202350000	214860000	172140000	178720000	177890000	174210000	162830000	189410000	184720000	176940000	159110000	208200000
Q502X2	DIABLO	Diablo homolog, mitochondrial	9	3459400000	115	205770000	212910000	213280000	187220000	194120000	227430000	206700000	286020000	219420000	221790000	145970000	185190000	183290000	221300000	154140000	143220000	157640000	174010000	170790000	143310000
A0A384MEE7	ERP44	Endoplasmic reticulum resident protein 44	15	3454700000	171	184530000	173180000	175050000	181480000	175760000	152580000	146590000	174340000	172090000	146460000	292440000	313070000	327760000	345220000	313100000	138060000	124390000	151430000	130130000	136490000
Q8TEX9	IPO4	Importin-4	28	3442900000	314	283550000	315760000	331270000	373000000	289880000	149280000	191250000	183690000	204590000	179260000	162950000	134720000	136260000	77399000	123840000	111420000	98765000	75905000	86059000	131720000
C0JYZ2	TTN	Titin	12	3437500000	39	0	0	0	0	0	0	0	0	0	0	0	0	289270000	0	241560000	230740000	0	0	0	0
Q9ULC4	MCTS1	Malignant T-cell-amplified sequence 1	10	3431600000	150	191590000	193370000	200240000	189820000	175870000	201540000	250420000	224540000	187190000	223470000	201150000	171630000	155170000	201350000	184820000	169100000	151500000	196300000	212590000	149040000
Q13422	IKZF1	DNA-binding protein Ikaros	12	3430500000	144	207060000	201550000	171480000	210590000	177060000	227250000	170910000	197970000	255230000	175340000	201140000	185450000	166070000	143060000	149810000	202340000	191200000	145680000	146620000	190110000
P55735	SEC13	Protein SEC13 homolog	8	3429000000	154	229550000	217620000	218160000	223580000	211890000	172140000	226480000	190310000	225320000	198850000	179870000	157920000	143360000	155590000	160890000	183930000	179360000	175170000	179860000	166140000
B4DWN1	LMAN2	Vesicular integral-membrane protein VIP36	12	3424500000	151	215680000	190000000	233710000	246130000	221760000	205640000	205820000	197050000	215020000	103160000	169710000	141090000	187430000	219030000	196940000	133300000	147300000	224880000	130690000	242840000
A0A024R9D7	DECR1	2,4-dienoyl-CoA reductase, mitochondrial	11	3421900000	138	219770000	224120000	236780000	225390000	229770000	189380000	215200000	241510000	215780000	251660000	177570000	159230000	155710000	172100000	142510000	142430000	141430000	137990000	152330000	138910000
Q14694	USP10	Ubiquitin carboxyl-terminal hydrolase 10	17	3420000000	283	195990000	217720000	250540000	220780000	212080000	194510000	195250000	206570000	203170000	226540000	163910000	160830000	156700000	156740000	157450000	195130000	182900000	150990000	139260000	183910000
Q15645	TRIP13	Pachytene checkpoint protein 2 homolog	16	3417700000	224	285920000	273680000	242680000	272380000	269900000	212290000	217770000	193210000	219930000	211760000	128950000	154290000	145920000	136190000	144090000	131600000	150460000	79252000	124620000	135010000
Q53FU3	COPZ1	Coatomer subunit zeta-1	6	3407300000	111	175990000	167310000	160770000	156410000	157020000	189490000	178740000	177130000	112020000	173910000	222690000	194790000	218590000	217590000	234560000	229890000	208830000	229350000	242490000	211900000
Q8WWY3	PRPF31	U4/U6 small nuclear ribonucleoprotein Prp31	14	3406300000	175	208130000	232760000	220820000	210420000	227520000	248420000	232030000	246900000	213900000	236850000	133130000	166640000	143970000	162140000	130430000	168740000	149460000	150810000	155300000	173250000
V9HW63	HEL-S-97n	Peroxiredoxin-4	11	3405300000	165	165920000	180760000	157130000	183580000	164940000	198280000	190000000	189430000	235510000	194950000	181150000	205860000	240970000	162140000	199890000	189430000	174500000	240820000	189650000	209820000
Q9Y2V2	CARHSP1	Calcium-regulated heat stable protein 1	5	3403500000	130	184220000	185230000	164510000	167650000	192790000	200600000	240620000	256980000	233060000	256260000	154300000	155200000	133110000	146070000	135520000	185160000	170330000	157050000	179010000	152680000
Q8WVM8	SCFD1	Sec1 family domain-containing protein 1	21	3402800000	261	124450000	138860000	166100000	154830000	167270000	191530000	134260000	189800000	158860000	211230000	225140000	227650000	207240000	205270000	220580000	239140000	220740000	232140000	264260000	206590000
C9JP00	MBNL1	Muscleblind-like protein 1	8	3402000000	121	218610000	234460000	180510000	169630000	265920000	231630000	202800000	186760000	263450000	205530000	175880000	173190000	156910000	133130000	94022000	201020000	229490000	109570000	134760000	153980000
A0A1U9X7A6	BAT3	Large proline-rich protein BAG6	23	3400000000	274	188100000	200400000	207930000	184960000	184400000	203450000	192300000	197740000	202200000	199500000	168320000	183310000	173460000	181460000	171610000	176450000	175490000	161240000	188500000	161370000
Q8NFW8	CMAS	N-acylneuraminate cytidylyltransferase	15	3390900000	170	119110000	80470000	111370000	91166000	101810000	148180000	144210000	108830000	136500000	165250000	282970000	314550000	328270000	276980000	301880000	196180000	217990000	300000000	294390000	187490000
V9HW91	HEL-S-8a	Omega-amidase NIT2	14	3380300000	172	271270000	241260000	254620000	262090000	256540000	274960000	297920000	319330000	270500000	338480000	80239000	71394000	90194000	82826000	87187000	97537000	110240000	76230000	102010000	94954000
P50851	LRBA	Lipopolysaccharide-responsive and beige-like anchor protein	43	3373500000	366	69430000	53190000	95477000	78530000	87678000	79085000	93154000	148360000	140740000	108390000	256250000	326910000	231130000	225130000	278770000	321610000	363510000	303570000	334800000	274060000
B3KMR5	RRP12	RRP12-like protein	31	3372600000	280	163970000	193760000	181430000	179580000	182230000	177380000	214400000	222860000	187610000	231110000	167800000	195940000	175150000	176170000	175890000	169670000	169470000	202800000	196100000	178310000
A0A024R0R1	ARHGEF1	Rho guanine nucleotide exchange factor 1	26	3363200000	278	196110000	172910000	165470000	184650000	186910000	257710000	242000000	230710000	212590000	226310000	155150000	162720000	147550000	139300000	136550000	187300000	181110000	164040000	208640000	190340000
B3KNH5	AP1M1	AP-1 complex subunit mu-1	17	3362600000	178	175820000	202490000	161890000	163690000	162610000	179070000	193980000	182420000	191210000	150370000	178730000	191710000	221300000	200290000	206210000	221730000	196110000	176650000	192280000	202490000
Q93008	USP9X	Probable ubiquitin carboxyl-terminal hydrolase FAF-X	47	3362500000	405	185120000	176070000	200360000	157330000	180500000	173110000	196060000	100010000	208100000	227990000	209240000	162840000	179500000	184050000	183420000	201320000	182350000	242430000	223370000	188510000
O75663	TIPRL	TIP41-like protein	10	3340100000	174	151470000	176190000	161370000	160880000	174530000	204740000	156110000	187400000	162760000	192130000	157370000	170750000	165820000	132860000	167500000	187580000	199920000	151230000	182100000	151940000
A0A024RDQ8	RFC3	Replication factor C subunit 3	14	3312900000	175	186130000	177610000	208940000	191290000	206500000	228850000	184650000	154380000	229350000	205240000	139290000	125810000	155080000	149790000	146380000	203570000	244280000	100160000	132530000	230830000
F8W7U8	MRE11A	Double-strand break repair protein MRE11A	20	3312800000	217	193110000	181320000	180320000	174690000	193730000	217590000	203550000	193260000	215560000	217690000	156010000	180710000	174510000	164700000	155810000	187630000	179090000	142120000	159780000	165990000
B7ZL14	FNBP1	Formin-binding protein 1	17	3307600000	181	347770000	353020000	403580000	269740000	279380000	256190000	343610000	380610000	278380000	469750000	0	0	0	24722000	27299000	16440000	0	42193000	0	0
B0UXD8	HLA-DRA1	HLA class II histocompatibility antigen, DR alpha chain	6	3284500000	135	113970000	114350000	120120000	108790000	116890000	132770000	150820000	99333000	140520000	117430000	273410000	218990000	318300000	276090000	327340000	211720000	226560000	254680000	186050000	272040000
D9ZGF8	ROCK1	Rho-associated protein kinase	32	3281800000	310	136390000	0	96210000	82118000	125250000	218750000	174500000	150370000	155640000	184860000	227990000	254730000	174960000	198500000	207350000	272580000	302320000	267750000	326110000	246190000
A0A384ME80	MTAP	S-methyl-5-thioadenosine phosphorylase	15	3276500000	159	254580000	165010000	218280000	177180000	243760000	152230000	192510000	183290000	175090000	185740000	152790000	136550000	168270000	159670000	157260000	183170000	180960000	179670000	166480000	162910000
V9HW65	HEL-S-270	Annexin	18	3274900000	125	243200000	262360000	235900000	259890000	240270000	429240000	414920000	426530000	355320000	467900000	0	0	0	0	0	0	0	141520000	0	0
Q86UY0	TXNDC5	Thioredoxin domain-containing protein 5	17	3270500000	197	91935000	106220000	45724000	67077000	95096000	13390000	0	57478000	28974000	0	268650000	281250000	325560000	306640000	212440000	439040000	390250000	272980000	359210000	388540000
A0A140VK83	PPP1R7	Protein phosphatase 1 regulatory subunit 7	16	3262200000	219	118280000	126100000	139430000	116840000	113290000	137600000	141650000	129180000	126490000	155200000	238990000	272670000	239690000	250830000	263120000	238590000	255930000	254010000	258100000	222160000
Q58FF8	HSP90AB2P	Putative heat shock protein HSP 90-beta 2	11	3255300000	164	100870000	100370000	106450000	104220000	102290000	85207000	122560000	83388000	112540000	90148000	332060000	250160000	245250000	234450000	264240000	214430000	196510000	224680000	186260000	196280000
CON__P35908	KRT2	Keratin, type II cytoskeletal 2 epidermal	25	3252700000	119	666940000	0	0	0	50812000	0	52840000	0	0	96258000	42325000	1278400000	47625000	0	0	0	163050000	967490000	33095000	293180000
B2RBP3	UBA3	NEDD8-activating enzyme E1 catalytic subunit	18	3249500000	194	147670000	134230000	155690000	112540000	161950000	167130000	175330000	217790000	157330000	197530000	210100000	176640000	207060000	191360000	186760000	190910000	241880000	216080000	217180000	179420000
Q13526	PIN1	Peptidyl-prolyl cis-trans isomerase NIMA-interacting 1	10	3237200000	179	164880000	173320000	152840000	174130000	170680000	142390000	164400000	140770000	142150000	191380000	196320000	181650000	192990000	210050000	205400000	196740000	189820000	149720000	146060000	178960000
P40259	CD79B	B-cell antigen receptor complex-associated protein beta chain	4	3236600000	82	254650000	226520000	222190000	251830000	238220000	191940000	154420000	172660000	186170000	118980000	182460000	174850000	161230000	154420000	155180000	128230000	138510000	142690000	142400000	166630000
E9PL57	NEDD8-MDP1	Magnesium-dependent phosphatase 1	5	3235200000	83	253540000	212430000	231620000	237370000	241700000	179730000	251790000	234600000	217780000	236860000	134620000	114530000	132520000	104000000	140200000	132870000	107160000	152790000	125980000	121600000
A0A384MQX1	LMNA	Prelamin-A/C	26	3235000000	188	285520000	263830000	240970000	304980000	274380000	304480000	403670000	521310000	228910000	477820000	0	0	0	0	0	0	0	47701000	20527000	0
Q71U36	TUBA1A	Tubulin alpha-1A chain	28	3234100000	89	0	139980000	0	0	0	0	0	149970000	0	0	250280000	203980000	198870000	164640000	213090000	166710000	122340000	179480000	198040000	179750000
O75436	VPS26A	Vacuolar protein sorting-associated protein 26A	14	3231900000	151	223160000	207470000	211850000	201200000	206950000	176430000	167190000	184260000	152030000	195730000	197340000	198970000	172770000	169990000	187670000	149100000	179440000	147730000	143200000	128510000
O94826	TOMM70A	Mitochondrial import receptor subunit TOM70	19	3224800000	211	256370000	212400000	223880000	267900000	242220000	265550000	171870000	239870000	226550000	148950000	98105000	123330000	149640000	129950000	112760000	116680000	113800000	174730000	135890000	144210000
Q53F59	GCHFR	GTP cyclohydrolase 1 feedback regulatory protein	5	3211900000	118	52183000	47405000	82405000	66489000	0	134000000	194780000	205990000	148270000	182440000	285400000	215170000	213380000	214900000	246970000	254190000	247710000	300020000	346730000	169130000
B2R7E8	RPA2	Replication protein A 32 kDa subunit	6	3201100000	95	151750000	170650000	148390000	143420000	146860000	218790000	214160000	227430000	183260000	249370000	161930000	159110000	140630000	171430000	149780000	151600000	146210000	169110000	190610000	225330000
Q53S54	CUL3	Cullin-3	26	3197200000	302	106210000	138860000	126610000	131020000	100340000	140620000	154070000	151300000	142080000	148410000	271260000	223200000	241130000	197190000	236810000	216870000	257590000	202950000	219120000	211720000
A0A140VJP2	MAT2B	Methionine adenosyltransferase 2 subunit beta	15	3195600000	172	229380000	241880000	193940000	167410000	230690000	311270000	243080000	179290000	210180000	237650000	103280000	109930000	113430000	109720000	105590000	180810000	157340000	152860000	151850000	125130000
A0A2R8YD58	CSNK2A1	Casein kinase II subunit alpha	14	3183600000	222	199020000	171900000	175500000	169590000	213900000	145520000	167490000	180860000	153920000	169380000	202210000	163700000	167210000	154330000	162070000	193770000	182120000	165640000	158470000	169110000
G3V2U7	ACYP1	Acylphosphatase	5	3181000000	94	199780000	220520000	202900000	216750000	219560000	254170000	232860000	306970000	193810000	243400000	100220000	102840000	99469000	93670000	98308000	167210000	139810000	121100000	180720000	112090000
A0A0S2Z472	PRKAR2A	cAMP-dependent protein kinase type II-alpha regulatory subunit	17	3175200000	194	217810000	198340000	192030000	169550000	219840000	253710000	220230000	263340000	233730000	244840000	146850000	133750000	128960000	137780000	121580000	113980000	121010000	132300000	112610000	87175000
A0A024RD11	PPP2R5D	Serine/threonine-protein phosphatase 2A 56 kDa regulatory subunit delta isoform	19	3174900000	193	190930000	187620000	195660000	194450000	206160000	225200000	211830000	200620000	200580000	199910000	178970000	172150000	111640000	153560000	136040000	159220000	149300000	140710000	148600000	166090000
A0A024R4E5	HDLBP	Vigilin	32	3168600000	272	189600000	210490000	207890000	176600000	192200000	134480000	149110000	135620000	153340000	133240000	214080000	228450000	216250000	223190000	233120000	166600000	146360000	138050000	107220000	142640000
H0YKT2	POU2F2	POU domain protein	9	3165400000	113	254960000	209780000	248320000	227540000	234020000	239320000	285040000	295020000	282240000	288350000	91256000	103740000	95945000	93289000	91973000	87912000	83646000	88060000	79249000	72061000
Q03701	CEBPZ	CCAAT/enhancer-binding protein zeta	26	3165000000	255	212360000	214530000	191750000	197930000	211500000	151160000	193140000	176510000	172430000	188820000	173260000	171200000	166470000	141110000	150600000	179530000	173840000	139410000	132650000	172040000
A0A024R0H7	WDR77	Methylosome protein 50	11	3163300000	126	239890000	238140000	202050000	217020000	237090000	167010000	193720000	193420000	189080000	223250000	135890000	143610000	127740000	147030000	138400000	126210000	135020000	132410000	135470000	138900000
B4DFY5	MAP2K1	Dual specificity mitogen-activated protein kinase kinase 1	16	3157000000	107	136250000	0	0	173850000	133010000	0	191700000	197570000	145920000	215500000	245010000	218390000	154830000	243670000	191790000	239250000	236060000	280570000	316510000	310990000
A0A384NPX8	UQCRFS1	Cytochrome b-c1 complex subunit Rieske, mitochondrial	10	3156000000	122	183060000	184260000	204630000	176190000	184520000	197140000	159230000	178740000	187660000	158000000	149410000	158750000	214540000	184990000	187940000	107400000	146530000	214200000	182090000	109480000
Q7LBC6	KDM3B	Lysine-specific demethylase 3B	32	3145600000	228	252240000	215540000	256210000	266060000	244190000	255140000	271600000	287740000	276060000	370760000	78245000	33676000	41698000	61976000	57915000	58123000	97053000	15405000	70248000	64374000
H3BV80	RNPS1	RNA-binding protein with serine-rich domain 1	6	3143600000	113	176330000	164440000	150770000	156300000	156030000	173120000	161720000	165730000	173630000	167290000	189880000	171790000	202580000	173300000	197910000	205440000	223480000	190490000	168820000	210890000
F6VRR5	POLDIP3	Polymerase delta-interacting protein 3	13	3143300000	167	214800000	193780000	210700000	200900000	183270000	194870000	171630000	175070000	165910000	194930000	158450000	157130000	171070000	150620000	157870000	184900000	194310000	131580000	130130000	171280000
Q5TZA2	CROCC	Rootletin	2	3128300000	11	0	0	0	0	0	0	0	0	0	0	0	0	0	0	0	0	0	0	249200000	0
A0A1W2PNX8	UNC45A	Protein unc-45 homolog A	27	3111600000	299	212940000	243870000	216850000	219180000	236750000	200470000	213110000	178550000	218110000	202230000	141400000	154080000	128960000	132020000	119850000	116510000	118270000	109630000	107160000	135160000
Q04864	REL	Proto-oncogene c-Rel	21	3104800000	231	85188000	58187000	80079000	95540000	97187000	162700000	90477000	105760000	93922000	117320000	286180000	327190000	303260000	341370000	255530000	208480000	226860000	239750000	225060000	189360000
B3KV49	GLOD4	Glyoxalase domain-containing protein 4	12	3104700000	142	124370000	111270000	127010000	123290000	123400000	135190000	128950000	144900000	109940000	127290000	225950000	213010000	204790000	217600000	213820000	248300000	247310000	231540000	315140000	219160000
P52948	NUP98	Nuclear pore complex protein Nup98-Nup96	32	3095800000	259	89696000	125690000	117490000	138190000	129570000	272110000	219640000	241520000	241620000	237850000	143800000	162070000	157400000	171440000	126890000	187210000	175760000	167110000	177930000	181350000
E9PHY5	EPB41L2	Band 4.1-like protein 2	28	3093800000	257	177780000	181830000	163230000	192520000	163250000	170950000	125060000	133450000	125070000	81352000	167970000	154710000	138040000	137680000	117990000	288000000	313670000	176040000	204950000	308980000
V9HWH0	HEL164	Lymphokine-activated killer T-cell-originated protein kinase	14	3084800000	183	80144000	95485000	112420000	112810000	54861000	90225000	83449000	96999000	99880000	88421000	403270000	372680000	307130000	273200000	304940000	258190000	213920000	12324000	75829000	267710000
A0A024RDU9	GTF2F2	General transcription factor IIF subunit 2	13	3082700000	172	197590000	149420000	208850000	217970000	198590000	205300000	202560000	171060000	153220000	265240000	181260000	170560000	128260000	95400000	91610000	112200000	123800000	131740000	102300000	162010000
Q9BPX3	NCAPG	Condensin complex subunit 3	26	3072000000	318	197530000	175820000	185680000	170750000	201080000	194990000	203070000	183110000	195140000	182040000	156320000	155650000	153760000	189920000	126940000	194320000	183460000	66773000	90788000	214210000
A0A0S2Z5J4	AP3B1	AP-3 complex subunit beta-1	22	3068900000	227	159240000	195270000	194980000	175910000	178170000	196940000	179970000	186160000	178210000	200070000	145690000	160620000	169410000	148960000	142700000	165100000	171220000	138930000	166120000	155820000
Q59GU6	SNX1	Sorting nexin-1	16	3062000000	206	162730000	163340000	164250000	175900000	183360000	151820000	162110000	150530000	149220000	163820000	149260000	184120000	173970000	165970000	171270000	239820000	201800000	124010000	136510000	216980000
A0A0P1J1R0	TPT1	Translationally-controlled tumor protein	6	3059400000	86	209520000	210530000	221960000	207570000	167590000	145390000	238610000	173840000	204590000	183700000	145920000	50066000	104570000	105420000	153660000	158470000	146010000	197180000	108920000	120500000
Q6IAP9	PRPF4	U4/U6 small nuclear ribonucleoprotein Prp4	20	3051300000	243	195220000	192640000	214500000	184940000	197920000	215990000	205120000	213520000	187580000	224920000	141960000	143930000	130930000	129030000	115510000	141510000	143150000	124590000	120970000	157360000
A0A024R9B7	COX6C	Cytochrome c oxidase subunit 6C	5	3049900000	63	158680000	208230000	253100000	210200000	211490000	217880000	0	195930000	162400000	131990000	223340000	198300000	218580000	192250000	172620000	108450000	128650000	148340000	0	162980000
B4DNR3	HEL-S-299	Alpha/beta hydrolase domain-containing protein 14B	6	3047800000	139	230790000	214280000	240330000	217580000	203510000	111050000	153580000	172900000	145240000	150560000	142190000	154350000	145920000	145940000	136230000	185920000	149800000	188940000	192620000	121330000
V9HW44	HEL-S-303	Platelet-activating factor acetylhydrolase IB subunit beta	6	3041500000	141	183890000	161930000	197780000	168290000	207780000	127180000	137990000	149570000	132630000	166850000	184320000	187330000	182930000	198140000	220040000	136840000	144580000	168480000	164950000	154110000
B2RDR4	TES	Testin	17	3039800000	107	254510000	239290000	183370000	239320000	231490000	309400000	309460000	355520000	274200000	324660000	0	0	0	0	0	220760000	112050000	73016000	100840000	0
Q96RS6	NUDCD1	NudC domain-containing protein 1	12	3038700000	134	207260000	229820000	216650000	212930000	220360000	200440000	172010000	228480000	184320000	207970000	119580000	123870000	115720000	154490000	103700000	101950000	104500000	116520000	125030000	143450000
Q6IBK5	GTF2F1	General transcription factor IIF subunit 1	15	3035400000	196	180680000	189580000	176540000	170290000	202410000	129420000	166050000	173260000	140470000	209850000	165660000	194830000	184470000	192090000	151210000	165920000	172060000	119560000	135910000	173030000
Q9NX20	MRPL16	39S ribosomal protein L16, mitochondrial	8	3027300000	81	233670000	211180000	172300000	200530000	197630000	191450000	168810000	170830000	199370000	191090000	167140000	167840000	188790000	209990000	190580000	176080000	0	0	152430000	0
P21912	SDHB	Succinate dehydrogenase [ubiquinone] iron-sulfur subunit, mitochondrial	8	3025100000	108	125550000	139360000	153920000	158500000	160080000	157200000	159970000	195120000	186580000	148490000	205720000	180270000	187550000	194380000	209880000	148230000	142360000	162590000	211550000	126420000
A8K4W8	UBE2L3	Ubiquitin-conjugating enzyme E2 L3	8	3021700000	94	127370000	0	119440000	119980000	107780000	88830000	0	94802000	93223000	118020000	170840000	140260000	272370000	282870000	292050000	280920000	168030000	254150000	306180000	257970000
A0A140VJH7	DAK	Bifunctional ATP-dependent dihydroxyacetone kinase/FAD-AMP lyase (cyclizing)	20	3019900000	225	166780000	167850000	143030000	181850000	176760000	176490000	172380000	188850000	147940000	180190000	147700000	133890000	133930000	145240000	144440000	159010000	192930000	173540000	232600000	149750000
Q9NX58	LYAR	Cell growth-regulating nucleolar protein	16	3019600000	202	91604000	124710000	108770000	112300000	103520000	100240000	106760000	98244000	92103000	95007000	232190000	190380000	271320000	236970000	283900000	221160000	257310000	192980000	204320000	225040000
A0A0G2JMG8	NLRP2	NACHT, LRR and PYD domains-containing protein 2	30	3013700000	196	328110000	346340000	338640000	328020000	334200000	285020000	279700000	284000000	298950000	308280000	0	0	0	0	0	0	0	0	0	0
O43290	SART1	U4/U6.U5 tri-snRNP-associated protein 1	18	3001900000	260	191380000	181670000	194910000	177390000	183270000	232280000	205000000	203740000	190520000	226830000	126280000	118070000	138630000	123390000	129650000	150820000	147810000	120420000	119630000	145430000
A0A384MR27	LGALS1	Galectin-1	7	3001500000	88	0	0	0	0	0	0	0	0	0	0	231100000	195400000	258310000	232730000	255700000	236170000	252990000	938900000	684730000	191930000
M0R208	CLPP	ATP-dependent Clp protease proteolytic subunit	9	2983700000	182	162920000	137050000	142690000	140120000	141080000	107680000	100520000	120100000	127260000	82766000	230290000	222220000	229680000	236260000	232320000	187730000	196410000	220610000	235790000	152770000
A0A384NL22	PSMB3	Proteasome subunit beta type-3	10	2982200000	118	104360000	105430000	110110000	93884000	111880000	131440000	183420000	148680000	179010000	174730000	247860000	191230000	191190000	206310000	272070000	181870000	205170000	212160000	224990000	148750000
O14617	AP3D1	AP-3 complex subunit delta-1	30	2972400000	318	150390000	172470000	153470000	175750000	169460000	200320000	180480000	167620000	165680000	159940000	129150000	156170000	156400000	166500000	183990000	165760000	155030000	175770000	174180000	167200000
Q92979	EMG1	Ribosomal RNA small subunit methyltransferase NEP1	12	2955700000	162	199090000	193340000	222000000	198880000	196630000	216560000	177250000	160560000	202080000	184990000	121470000	128740000	135280000	133110000	124540000	165470000	155680000	95246000	108180000	154430000
A0A384NKJ3	ECI1	Enoyl-CoA delta isomerase 1, mitochondrial	7	2951100000	132	240730000	230620000	226000000	234270000	240050000	160700000	177610000	202140000	227990000	167750000	91255000	87531000	102060000	88503000	89048000	113550000	125360000	127890000	141640000	102670000
O95782	AP2A1	AP-2 complex subunit alpha-1	28	2928500000	267	168300000	180750000	189430000	171240000	193760000	193660000	169330000	176980000	193880000	184760000	159420000	140890000	137250000	138900000	147640000	143790000	151120000	124180000	132910000	136060000
Q9UNS2	COPS3	COP9 signalosome complex subunit 3	14	2913600000	216	183900000	195650000	163870000	159610000	174780000	149520000	139450000	149190000	155840000	147450000	165330000	135100000	169760000	144540000	183050000	149150000	132170000	154760000	164810000	152290000
A8K5S3	IST1	IST1 homolog	9	2913500000	91	172470000	215860000	174460000	197130000	215680000	231960000	172810000	220800000	171230000	200630000	120900000	161070000	139850000	145040000	122330000	0	124150000	155840000	143210000	122410000
Q12792	TWF1	Twinfilin-1	14	2884100000	162	230970000	222270000	240600000	224680000	235030000	150010000	125920000	99408000	142870000	164950000	205870000	226100000	203180000	198200000	197240000	0	0	0	0	0
Q9UM02	PREP	Prolyl endopeptidase	23	2880200000	286	176830000	203800000	189510000	185840000	177390000	160310000	178760000	204190000	171940000	186870000	123020000	119290000	128930000	111090000	135950000	143780000	142450000	147540000	154880000	123180000
Q549C5	MST065	Mitochondrial import receptor subunit TOM22 homolog	6	2877900000	128	162690000	162090000	228100000	185020000	186150000	133210000	165510000	144020000	175380000	115980000	152710000	148420000	172620000	158490000	164960000	127130000	137170000	178500000	136220000	187620000
Q53HJ0	COPS2	COP9 signalosome complex subunit 2	19	2874500000	183	172910000	185030000	181410000	142910000	172670000	100920000	140820000	115370000	140260000	149260000	216510000	170780000	156510000	163820000	190120000	163200000	186690000	155820000	170030000	163480000
P36405	ARL3	ADP-ribosylation factor-like protein 3	7	2871500000	139	189720000	196920000	198620000	184230000	172580000	175550000	156290000	148370000	153440000	163420000	172420000	188570000	198650000	176310000	193390000	95578000	87710000	75562000	83478000	60673000
P53582	METAP1	Methionine aminopeptidase 1	11	2871200000	170	163600000	152610000	154980000	151920000	151210000	181630000	173310000	202510000	177370000	201940000	125340000	143830000	138830000	171820000	123990000	153330000	158270000	156130000	178130000	160750000
A8KA83	VAPA	Vesicle-associated membrane protein-associated protein A	7	2870100000	136	115840000	110720000	110760000	124620000	120790000	153680000	171670000	160360000	162500000	97615000	173020000	197350000	205400000	195290000	155830000	198510000	183240000	258780000	213050000	214330000
Q6FI81	CIAPIN1	Anamorsin	13	2869700000	130	208770000	224130000	196520000	233440000	201560000	219620000	164470000	200400000	202010000	177900000	137940000	120840000	111750000	119540000	113790000	109350000	98838000	64956000	93688000	128060000
P62312	LSM6	U6 snRNA-associated Sm-like protein LSm6	6	2852400000	108	123480000	112310000	124610000	124540000	142620000	170040000	166460000	178660000	156550000	192570000	150060000	154940000	135200000	173150000	136660000	182060000	187030000	147090000	215470000	248190000
Q9BTT5	NDUFA9	NADH dehydrogenase [ubiquinone] 1 alpha subcomplex subunit 9, mitochondrial	14	2849200000	184	154470000	142740000	169540000	151370000	181830000	167860000	164300000	188420000	168810000	124330000	169840000	181200000	185480000	187900000	180470000	150530000	131420000	143320000	111850000	134020000
Q58FF6	HSP90AB4P	Putative heat shock protein HSP 90-beta 4	8	2848300000	41	0	0	0	166710000	131110000	0	0	0	0	0	0	212920000	356860000	0	0	458570000	0	347970000	0	0
N0E4C7	CSNK2B	Casein kinase II subunit beta	7	2847800000	120	165390000	210890000	177560000	190520000	159880000	196330000	170210000	176570000	159690000	153010000	139490000	134490000	156870000	135740000	137080000	145440000	153750000	125500000	122860000	172490000
A0A024R3P9	ACBD3	Golgi resident protein GCP60	14	2844200000	170	186120000	235670000	212400000	168030000	186910000	169850000	182050000	149630000	189860000	189710000	130630000	134750000	115960000	139960000	99671000	111860000	107110000	140870000	113690000	127290000
B7Z792	NDUFS2	NADH dehydrogenase [ubiquinone] iron-sulfur protein 2, mitochondrial	15	2843300000	141	192800000	195760000	202670000	166310000	219840000	186030000	141900000	207590000	165060000	159420000	154270000	134340000	143420000	165900000	139390000	120130000	106670000	112110000	107590000	110750000
A0A024R7K7	GATAD2A	Transcriptional repressor p66-alpha	19	2842800000	200	166070000	172410000	169730000	179160000	169320000	184730000	158710000	159990000	146790000	180220000	116690000	114020000	127090000	120300000	101430000	162270000	190260000	93444000	129690000	177710000
A0A024RCX8	PPIL1	Peptidyl-prolyl cis-trans isomerase	4	2839800000	79	191350000	167140000	195890000	168420000	218760000	159690000	0	224340000	151810000	193080000	137520000	157070000	142270000	0	144610000	148980000	159340000	131280000	139520000	166960000
P60520	GABARAPL2	Gamma-aminobutyric acid receptor-associated protein-like 2	7	2836500000	114	102040000	99882000	95737000	75672000	95584000	88302000	122060000	132890000	71364000	114510000	249480000	221280000	185050000	256900000	216050000	282410000	266240000	214110000	227460000	183190000
P14927	UQCRB	Cytochrome b-c1 complex subunit 7	7	2836100000	117	159050000	132310000	155780000	128820000	140780000	105720000	100200000	144410000	164630000	115090000	141920000	172990000	258330000	237500000	238320000	127070000	144910000	211520000	208920000	117390000
O43681	ASNA1	ATPase ASNA1	13	2834800000	153	170210000	157490000	158690000	158690000	171460000	120700000	145560000	151930000	120340000	170880000	151280000	159020000	147260000	152640000	163610000	171280000	150050000	189440000	196730000	159210000
G5E9W7	MRPS22	28S ribosomal protein S22, mitochondrial	15	2834100000	169	186330000	189470000	205000000	186770000	195480000	169080000	128960000	178100000	187680000	153740000	139530000	158870000	184080000	156880000	150690000	119680000	119680000	107540000	91091000	116000000
Q52LJ0	FAM98B	Protein FAM98B	9	2829300000	133	179890000	179830000	194430000	158920000	207850000	228090000	198340000	237130000	189460000	205830000	101500000	112860000	94979000	101740000	100060000	113340000	133210000	164790000	142450000	136690000
V9HW04	HEL-S-80p	Serine/threonine-protein phosphatase	16	2826200000	87	179820000	157080000	144670000	160400000	142290000	149890000	171430000	150970000	158710000	151370000	152030000	134880000	147500000	148900000	144510000	171950000	180250000	189050000	170010000	176720000
B2R6H7	TNPO3	Transportin-3	24	2825000000	258	97088000	120890000	86871000	106330000	87175000	109640000	120460000	114270000	102070000	133390000	196360000	149290000	176870000	153710000	178920000	259090000	213150000	262810000	239480000	228260000
A0A140VK13	CPT2	Carnitine O-palmitoyltransferase 2, mitochondrial	19	2823600000	240	141420000	153820000	149410000	155980000	159780000	175970000	140780000	194830000	165360000	147450000	159560000	191900000	173910000	165640000	169350000	135720000	133130000	171640000	166200000	133080000
A0A384MR19	VPS29	Vacuolar protein sorting-associated protein 29	7	2821500000	131	209210000	235440000	174150000	214070000	209600000	171140000	118860000	170660000	143390000	134370000	144700000	132360000	136280000	160360000	115510000	112610000	113500000	114350000	112270000	117870000
E9PQ57	RAE1	mRNA export factor	12	2821200000	137	134500000	125200000	145830000	139070000	149600000	164160000	169260000	200280000	179270000	204130000	174980000	160120000	148840000	151890000	149620000	156590000	177950000	140340000	134770000	153120000
A8K885	SNX6	Sorting nexin-6	16	2818500000	172	144760000	126030000	132390000	149790000	146290000	116410000	145880000	172870000	85602000	152640000	193290000	170210000	145210000	192920000	208540000	174570000	167370000	198950000	216960000	172730000
A0A024QZJ7	CCDC6	Coiled-coil domain-containing protein 6	10	2817200000	82	185420000	150920000	189670000	0	172520000	0	135320000	0	156320000	114930000	257020000	208940000	273520000	284940000	258750000	192360000	193990000	185980000	176780000	159560000
O60488	ACSL4	Long-chain-fatty-acid--CoA ligase 4	21	2814600000	200	123660000	121830000	144820000	134380000	135220000	180930000	171970000	169310000	158410000	186730000	217320000	187990000	200830000	206910000	199900000	118930000	145080000	118600000	113890000	136120000
P24928	POLR2A	DNA-directed RNA polymerase II subunit RPB1	37	2813700000	302	154340000	156810000	149600000	127210000	160200000	161040000	133310000	171340000	109090000	170570000	260850000	165010000	168380000	147050000	121210000	170740000	189350000	139260000	136530000	189890000
A0A0F7NGI8	LRRFIP1	Leucine-rich repeat flightless-interacting protein 1	23	2811400000	231	0	0	53085000	0	0	0	0	0	0	0	248750000	256330000	241120000	295450000	260500000	305320000	257600000	250980000	274100000	376360000
V9HWJ5	HEL-S-90n	Nicotinate-nucleotide pyrophosphorylase [carboxylating]	9	2798800000	83	162610000	189290000	248690000	160000000	206640000	94060000	261610000	158010000	201450000	221320000	0	0	0	0	101750000	159940000	151150000	284350000	229320000	75766000
Q15269	PWP2	Periodic tryptophan protein 2 homolog	22	2795900000	251	180890000	195490000	199420000	196970000	186830000	180880000	172910000	147860000	183480000	182170000	126500000	124340000	134980000	121640000	131950000	140030000	126830000	111770000	122520000	137310000
C9JLU1	POLR2H	DNA-directed RNA polymerases I, II, and III subunit RPABC3	7	2794500000	96	146600000	150510000	131940000	150790000	168650000	154230000	120550000	127770000	157010000	165770000	197590000	101440000	125440000	138450000	130530000	210120000	93202000	119880000	154080000	218990000
Q5STK2	PFDN6	Prefoldin subunit 6	6	2792300000	81	157480000	136460000	153090000	150660000	158050000	176440000	169780000	134790000	131300000	169490000	178330000	167980000	151180000	169590000	138310000	173620000	169210000	132730000	161730000	168760000
A0A024R2M6	ACAA1	3-ketoacyl-CoA thiolase, peroxisomal	15	2784400000	236	132120000	140640000	151630000	143870000	148020000	143540000	179840000	187110000	183980000	165000000	169900000	149850000	172270000	165440000	173760000	142740000	146350000	126840000	150500000	134230000
O14745	SLC9A3R1	Na(+)/H(+) exchange regulatory cofactor NHE-RF1	11	2781200000	133	222000000	222220000	223430000	193110000	214850000	266910000	231790000	237510000	199820000	250470000	70367000	68746000	73666000	66898000	67503000	82139000	80799000	51611000	67718000	60903000
Q0P607	SFRS15	Splicing factor, arginine/serine-rich 15	11	2773400000	185	160870000	164370000	167470000	177880000	182690000	174060000	192580000	192690000	163340000	189310000	129220000	122310000	137020000	132410000	117280000	116630000	136570000	113380000	134190000	124020000
P50238	CRIP1	Cysteine-rich protein 1	3	2771900000	52	0	0	0	271070000	285070000	0	0	0	138360000	0	432510000	0	121310000	0	86627000	184700000	0	0	213120000	207660000
J3QK89	CHERP	Calcium homeostasis endoplasmic reticulum protein	17	2767400000	190	135840000	157190000	129720000	155910000	140120000	107580000	128570000	148220000	134970000	155450000	191950000	167820000	149730000	173210000	154990000	177790000	171520000	174770000	183140000	192540000
A0A140VK65	ATP6V1B2	V-type proton ATPase subunit B, brain isoform	21	2763000000	165	75135000	94375000	63308000	93926000	97352000	0	29475000	102840000	96435000	96982000	281240000	248040000	260780000	235460000	303330000	203100000	218410000	208480000	264140000	168360000
A0A0S2Z3S5	GNAS	Guanine nucleotide-binding protein G(s) subunit alpha isoforms short	11	2752700000	150	117910000	135920000	126240000	126700000	119260000	214980000	179220000	209040000	203700000	170450000	114100000	136360000	121750000	129010000	126310000	163920000	178350000	190020000	193810000	169680000
A0A140VJN3	LRRC40	Leucine-rich repeat-containing protein 40	22	2745700000	224	158940000	136410000	169110000	176010000	132510000	125110000	119560000	176280000	131040000	163310000	142230000	157890000	149760000	149400000	142920000	182370000	185400000	157490000	178050000	155340000
Q13564	NAE1	NEDD8-activating enzyme E1 regulatory subunit	16	2740800000	158	134580000	130130000	147780000	104410000	147350000	132200000	139100000	157760000	138760000	95793000	174520000	155000000	160420000	168110000	172880000	192280000	197200000	208050000	178000000	166410000
Q9H2M9	RAB3GAP2	Rab3 GTPase-activating protein non-catalytic subunit	33	2740200000	245	68471000	154770000	124580000	158670000	155410000	177020000	116540000	111490000	152810000	169510000	114140000	119920000	159900000	113500000	124180000	221010000	238190000	260070000	223820000	198400000
E5KND7	GFM1	Elongation factor G, mitochondrial	21	2739600000	215	143410000	128440000	145390000	145460000	154370000	111360000	105060000	127710000	71929000	82071000	172870000	194670000	202740000	188270000	178480000	223600000	203890000	201880000	169610000	222310000
A0A140VK41	PRPS2	Ribose-phosphate pyrophosphokinase 2	15	2737800000	124	175190000	148370000	188350000	181730000	197520000	120320000	146770000	144410000	148380000	132920000	148910000	127230000	129040000	144780000	181020000	165670000	165330000	146470000	145550000	129980000
B2RAH5	PPP1R12A	Protein phosphatase 1 regulatory subunit	16	2730900000	152	96159000	64789000	125120000	121870000	123680000	143080000	130700000	150410000	112780000	209300000	155550000	154820000	48190000	146500000	137040000	214670000	248600000	371030000	235760000	245180000
Q9H4L5	OSBPL3	Oxysterol-binding protein-related protein 3	27	2720400000	253	123690000	104590000	134460000	76054000	109510000	39777000	49593000	68624000	64654000	46672000	315200000	296260000	317860000	311180000	359980000	146990000	145270000	124320000	175530000	136500000
A0A0A6YYL4	CORO7-PAM16	Coronin	19	2693700000	223	108770000	107670000	112280000	93365000	100980000	144630000	137790000	134450000	126580000	158710000	207370000	202670000	181260000	177000000	179850000	147170000	159270000	192540000	242720000	156610000
B4DYP5	ANKRD13	Ankyrin repeat domain-containing protein 13A	17	2692800000	192	30203000	0	0	0	13444000	0	25677000	91192000	30824000	52620000	238750000	255540000	233850000	258190000	294320000	274190000	285760000	344410000	499560000	166510000
X5D8Y5	CTBP1	C-terminal-binding protein 1	13	2691400000	190	115280000	121940000	104520000	116120000	112010000	115910000	121020000	115480000	114910000	128690000	139960000	167860000	171450000	164790000	156710000	177880000	228270000	281620000	250840000	161860000
Q96C01	FAM136A	Protein FAM136A	5	2691000000	72	178950000	127910000	121870000	157450000	189070000	0	143380000	159380000	154500000	134190000	169720000	175230000	157240000	174920000	141800000	129210000	123170000	132440000	129240000	134460000
P08579	SNRPB2	U2 small nuclear ribonucleoprotein B	8	2686800000	74	157310000	157260000	185170000	0	151890000	158800000	175090000	194600000	167560000	0	162230000	133390000	120030000	132780000	126020000	111930000	110110000	131760000	127330000	145510000
Q8N335	GPD1L	Glycerol-3-phosphate dehydrogenase 1-like protein	11	2685800000	136	203960000	216850000	182020000	198590000	219100000	150510000	142030000	175090000	124920000	128830000	139270000	160380000	115260000	145580000	126310000	100480000	96686000	102660000	122730000	109380000
P20645	M6PR	Cation-dependent mannose-6-phosphate receptor	7	2680600000	84	104360000	113470000	93018000	95088000	117570000	0	100770000	142910000	149180000	127520000	208330000	208170000	190620000	187400000	187690000	189570000	207560000	244700000	215900000	169370000
Q0EAF5	CD22	B-cell receptor CD22	15	2679300000	164	203660000	185020000	194180000	203480000	248280000	201850000	121570000	134730000	132640000	123380000	129040000	137110000	134180000	123170000	122850000	137330000	89404000	129530000	90871000	133850000
A0A0S2Z4W1	SRRM1	Serine/arginine repetitive matrix protein 1	7	2677600000	124	109910000	137440000	152020000	110600000	140080000	108280000	138800000	140020000	144460000	130680000	175630000	179970000	168380000	141830000	135430000	153240000	192010000	152310000	158320000	162680000
P61960	UFM1	Ubiquitin-fold modifier 1	5	2659300000	76	91030000	85465000	76703000	0	98662000	121770000	116340000	116350000	98134000	111660000	201810000	174270000	219100000	206970000	222370000	235460000	245590000	196760000	222110000	194230000
Q5BKZ1	ZNF326	DBIRD complex subunit ZNF326	12	2658900000	168	136570000	139690000	165710000	152480000	143980000	148270000	138950000	135200000	150180000	133160000	187590000	171960000	154740000	166010000	158940000	167480000	142950000	115760000	141600000	166590000
A8K5J1	UMPS	Uridine 5-monophosphate synthase	16	2653000000	205	190810000	201730000	213810000	197550000	219020000	141800000	148510000	125490000	129100000	147170000	118410000	109000000	100440000	130800000	117890000	125250000	128110000	104370000	98161000	130030000
A0A384MTI8	DCPS	m7GpppX diphosphatase	14	2646200000	179	34081000	0	0	0	0	0	44927000	47451000	0	25796000	286270000	241150000	298550000	285890000	244340000	302710000	282930000	269190000	393340000	283090000
D6RC52	NHP2	H/ACA ribonucleoprotein complex subunit 2	5	2643700000	127	146150000	154090000	153740000	143690000	143040000	170740000	159650000	152440000	148870000	153170000	131050000	125730000	142260000	125600000	125750000	142940000	130770000	149160000	126660000	150230000
P51692	STAT5B	Signal transducer and activator of transcription 5B	19	2639400000	188	105350000	96959000	101990000	105840000	116000000	165470000	210260000	254560000	176810000	232280000	93856000	27030000	53039000	79759000	42141000	155810000	123190000	258670000	295870000	200490000
Q9BRP8	WIBG	Partner of Y14 and mago	10	2635000000	137	139320000	148090000	133030000	153320000	154750000	120210000	167190000	154670000	165370000	137140000	116260000	133950000	115210000	115760000	108030000	152610000	156440000	139400000	176250000	145800000
H0YI09	METTL7A	Methyltransferase-like protein 7A	7	2632400000	91	78097000	65134000	78442000	68302000	83169000	71519000	73820000	79914000	75650000	50187000	183400000	199670000	242340000	218020000	238250000	184650000	192590000	333470000	271010000	261260000
Q6FI51	DNAJB1	DnaJ homolog subfamily B member 1	11	2628900000	167	159520000	174660000	179880000	173450000	172690000	188240000	163560000	164490000	180520000	166240000	113290000	109100000	124290000	122710000	108130000	130260000	122580000	133500000	141310000	142280000
A4D105	RPA3	Replication protein A 14 kDa subunit	7	2625900000	140	103510000	97875000	107820000	105660000	122670000	142340000	148050000	136530000	135980000	150220000	139710000	146990000	151480000	151330000	146410000	175230000	183610000	165460000	188880000	152020000
A0A024RBR3	DENR	Density-regulated protein	9	2625300000	145	132330000	146900000	126760000	143700000	131140000	139920000	145700000	196740000	131600000	166180000	141810000	156540000	157980000	157700000	148510000	143560000	135810000	123930000	139140000	126750000
Q86U62	PSMB7	Proteasome subunit beta type	8	2623300000	120	108850000	79726000	104790000	110420000	129460000	225180000	240540000	151880000	173910000	228520000	139000000	110520000	129520000	118810000	84327000	107740000	116380000	125320000	130650000	176960000
Q9H2G0	UBE3A	Ubiquitin-protein ligase E3A	19	2613400000	213	182820000	151440000	181640000	160670000	170970000	193070000	185700000	219470000	194600000	203470000	107570000	105180000	98721000	95390000	98800000	114590000	103960000	84410000	92208000	117870000
Q9UQD4	SH3GL1	Endophilin-A2	12	2612200000	116	248180000	201550000	205830000	201830000	197760000	103270000	101730000	114460000	87597000	104120000	225120000	220670000	212680000	231550000	232820000	91517000	88132000	85364000	89832000	62693000
Q06210	GFPT1	Glutamine--fructose-6-phosphate aminotransferase [isomerizing] 1	21	2610600000	228	154460000	167770000	167820000	143090000	163220000	181280000	160600000	176140000	167110000	173410000	120760000	147240000	128620000	147770000	133520000	80209000	87427000	116940000	122750000	85176000
P46109	CRKL	Crk-like protein	15	2603100000	149	121600000	112430000	126790000	126850000	144960000	125080000	171210000	164130000	149600000	141010000	139440000	132550000	137500000	112510000	137950000	155880000	158980000	185980000	174200000	134490000
O95071	UBR5	E3 ubiquitin-protein ligase UBR5	40	2596500000	329	126420000	78507000	116670000	107110000	108070000	114960000	139130000	152840000	179460000	149220000	162470000	167100000	147660000	145110000	181950000	200200000	232000000	106470000	161150000	170970000
P01591	IGJ	Immunoglobulin J chain	6	2590900000	119	150440000	198780000	126690000	135390000	151490000	0	93510000	130780000	93838000	91668000	140220000	162810000	172840000	162760000	139980000	179940000	162480000	309380000	129530000	195140000
O95218	ZRANB2	Zinc finger Ran-binding domain-containing protein 2	8	2587700000	110	144020000	133100000	124750000	119730000	139980000	162220000	148500000	148490000	135510000	165090000	130810000	139170000	147640000	153800000	123200000	159680000	163470000	124220000	112580000	170980000
I3L0A0	TMEM189-UBE2V1	Ubiquitin-conjugating enzyme E2 variant 1	6	2574100000	37	180210000	0	145360000	145890000	0	164450000	182050000	197970000	0	204690000	94597000	142630000	119300000	116110000	101840000	114890000	120460000	134830000	124930000	122390000
Q15375	EPHA7	Ephrin type-A receptor 7	21	2571500000	127	308440000	308220000	282190000	324890000	295930000	309570000	223580000	237420000	207640000	221880000	0	0	0	0	0	0	0	0	0	0
X5D8T4	ALDH5A1		15	2569400000	170	110580000	104950000	93329000	106940000	104230000	84963000	86729000	130840000	76904000	122150000	184930000	193380000	225890000	175680000	187420000	188930000	155780000	272640000	252980000	120000000
B9A018	USP39	U4/U6.U5 tri-snRNP-associated protein 2	12	2566800000	200	134030000	140720000	147420000	140880000	148280000	156880000	160870000	132530000	144140000	165170000	135920000	126300000	141100000	121350000	133160000	175990000	163440000	132310000	160590000	145360000
Q6IPT9	EEF1A1	Elongation factor 1-alpha	25	2551800000	8	0	0	0	0	0	0	0	0	0	0	0	0	0	0	0	0	0	0	0	116430000
B4DP80	APOA1BP	NAD(P)H-hydrate epimerase	9	2549700000	107	189020000	185240000	193150000	202450000	186190000	134080000	184860000	158910000	150760000	145950000	106310000	87399000	112610000	100740000	125790000	99773000	119950000	137590000	143590000	82033000
Q6ZUJ8	PIK3AP1	Phosphoinositide 3-kinase adapter protein 1	20	2544300000	196	112260000	90338000	39975000	0	101400000	46970000	95443000	89464000	100140000	86927000	255960000	223260000	194080000	202830000	236280000	186360000	194650000	223360000	181000000	224650000
A8K3C5	LUC7L3	Luc7-like protein 3	8	2535600000	183	143780000	154970000	159090000	156880000	148320000	140160000	141950000	153460000	158490000	128780000	107750000	104340000	119360000	103170000	112160000	123180000	117720000	88860000	101540000	126910000
Q9Y5X3	SNX5	Sorting nexin-5	17	2534800000	213	142530000	145880000	143200000	137840000	166370000	175390000	150030000	138080000	136620000	163140000	98172000	106000000	135860000	110610000	109210000	144740000	160780000	132490000	149270000	149950000
O75717	WDHD1	WD repeat and HMG-box DNA-binding protein 1	25	2532900000	212	222890000	225570000	201830000	235210000	219910000	184020000	157580000	146530000	168680000	175430000	87019000	78199000	79272000	70540000	47211000	138210000	123140000	0	47486000	134320000
Q5JRI1	SRSF10	Serine/arginine-rich splicing factor 10	7	2524200000	138	133570000	116600000	119740000	84393000	124880000	122890000	123480000	110330000	97955000	128410000	118040000	120460000	145090000	120380000	113010000	129650000	139220000	130660000	135350000	161570000
Q9NZL4	HSPBP1	Hsp70-binding protein 1	13	2521300000	189	137280000	147430000	152190000	145240000	146930000	142020000	163680000	154020000	155500000	170930000	142530000	143420000	128410000	125110000	102510000	137650000	133400000	85198000	98939000	122000000
A0A024R6I3	TMED10	Transmembrane emp24 domain-containing protein 10	6	2519900000	99	142970000	125740000	144250000	157570000	144150000	136240000	104130000	117230000	130960000	71229000	104030000	131460000	148410000	154280000	151300000	166650000	140020000	272730000	169220000	182080000
Q9Y6M9	NDUFB9	NADH dehydrogenase [ubiquinone] 1 beta subcomplex subunit 9	9	2513100000	116	171670000	169930000	152760000	161680000	162640000	151630000	145210000	209490000	201660000	147520000	123070000	145170000	158260000	111240000	123670000	72562000	85770000	77469000	91037000	96449000
Q96BN8	OTULIN	Ubiquitin thioesterase otulin	15	2509100000	115	219580000	176650000	229170000	176390000	263730000	168260000	174820000	231420000	227340000	242260000	38360000	61841000	0	0	0	0	157920000	34054000	173200000	0
A0A090N7U0	CUL1	Cullin-1	25	2504500000	236	129750000	122280000	97534000	95293000	112060000	130850000	121840000	102220000	81186000	122990000	184570000	214560000	163870000	202520000	239560000	190080000	190740000	123600000	79050000	188420000
Q53GF4	STXBP2	Syntaxin-binding protein 2	18	2500300000	175	175150000	182020000	160070000	166530000	184140000	158950000	165160000	169850000	152400000	184630000	99975000	100420000	103360000	98559000	100680000	107170000	113600000	114290000	117290000	104090000
A0A140VKA9	QDPR	Dihydropteridine reductase	9	2499300000	122	95162000	88239000	49490000	68984000	83542000	70678000	0	48050000	0	84826000	280430000	269030000	230650000	226480000	224730000	203610000	185950000	169480000	251860000	219640000
A0A024RBB8	OSBPL8	Oxysterol-binding protein	19	2497400000	204	0	32533000	19266000	73072000	13360000	55145000	43718000	30892000	40732000	0	165260000	202620000	213040000	231970000	235850000	319890000	237660000	350920000	299340000	377680000
B3KMC9	XRN2	5-3 exoribonuclease 2	22	2491800000	208	155080000	164850000	141610000	136420000	151960000	151350000	151190000	135980000	144700000	136170000	130340000	93731000	136090000	123620000	136060000	134390000	140030000	120030000	106000000	129360000
Q00534	CDK6	Cyclin-dependent kinase 6	14	2489700000	132	93281000	101360000	115230000	94908000	110620000	93037000	106850000	107450000	91180000	100250000	167810000	133940000	186000000	151070000	174500000	194700000	194390000	193750000	236210000	205850000
Q8NI62	OK/KNS-cl.6		5	2488900000	34	0	0	0	0	0	0	0	0	0	0	0	0	0	0	0	0	0	0	0	223130000
J3KNL2	2022-09-01	Septin-1	15	2482400000	181	130120000	120090000	123400000	118600000	130710000	147620000	182080000	184170000	188000000	203540000	110310000	128190000	101360000	139660000	102040000	102670000	115880000	154970000	142140000	80496000
Q9Y5J9	TIMM8B	Mitochondrial import inner membrane translocase subunit Tim8 B	4	2482300000	80	246300000	251070000	252250000	251820000	232910000	162440000	129040000	115600000	138030000	134940000	89007000	121830000	66765000	92955000	87987000	44451000	39115000	63244000	30356000	120420000
P60983	GMFB	Glia maturation factor beta	7	2480300000	125	156010000	148400000	150100000	148600000	153140000	130100000	141190000	91933000	121180000	93506000	204520000	154550000	170610000	158250000	226380000	93045000	90825000	99293000	84092000	85948000
Q6FHJ5	SCAMP3	Secretory carrier-associated membrane protein 3	8	2477200000	126	161880000	141490000	150800000	136710000	156730000	119500000	124860000	157740000	146050000	135660000	137850000	123110000	131150000	116190000	122410000	128350000	122030000	151890000	139260000	118180000
Q549N5	SRPRB	Signal recognition particle receptor subunit beta	11	2468000000	104	92193000	72424000	89350000	91728000	89556000	108990000	86791000	93626000	114390000	0	95354000	117920000	150950000	143280000	147330000	219310000	267870000	378810000	168070000	365270000
E7ERI8	CLASP2		35	2466700000	287	96413000	83194000	123960000	100040000	90324000	127700000	113540000	103260000	76507000	134990000	149530000	181230000	144880000	118400000	140260000	214130000	205010000	177690000	236890000	219660000
A0A024R2M7	OXSR1	Serine/threonine-protein kinase OSR1	14	2464400000	173	119150000	127710000	127210000	124260000	122730000	138260000	113530000	133660000	139060000	146630000	113480000	115700000	129090000	128800000	140740000	188310000	184410000	190980000	193330000	139240000
Q9UIG0	BAZ1B	Tyrosine-protein kinase BAZ1B	34	2461800000	251	172900000	172740000	172990000	146530000	168850000	44270000	83225000	89155000	121410000	76235000	124330000	151110000	139020000	149710000	129490000	191600000	162480000	126690000	124090000	199610000
Q8TBT6	CYC1	Cytochrome c1, heme protein, mitochondrial	6	2458900000	93	135660000	111080000	137250000	121210000	135650000	0	132350000	141290000	137970000	99138000	151160000	161380000	218090000	189610000	221350000	96109000	85906000	195580000	153840000	124440000
Q96GG9	DCUN1D1	DCN1-like protein 1	8	2449300000	125	85277000	94241000	104630000	96916000	96438000	125510000	118450000	152800000	125800000	122150000	169140000	160430000	154200000	161700000	148720000	195780000	170150000	145770000	185630000	164420000
A0A024R2Z6	GNL3	Guanine nucleotide-binding protein-like 3	17	2437600000	167	168170000	167990000	170410000	193180000	161180000	163020000	132260000	116680000	147120000	140070000	103630000	103140000	112240000	97444000	88618000	116380000	102920000	126980000	113330000	135470000
M0QXB4	COPE	Coatomer subunit epsilon	12	2437600000	189	123820000	112860000	124810000	118220000	120800000	103430000	132460000	113350000	137110000	147160000	170260000	136720000	155280000	142510000	165030000	153870000	152160000	168160000	143460000	153160000
Q9Y295	DRG1	Developmentally-regulated GTP-binding protein 1	16	2436600000	204	101300000	110300000	106830000	111550000	107580000	99309000	106560000	86684000	103330000	101810000	185260000	185240000	175070000	186870000	168160000	170270000	162210000	165050000	159510000	194230000
P40937	RFC5	Replication factor C subunit 5	17	2436100000	135	139580000	148180000	146070000	130330000	148050000	159940000	165670000	128410000	150460000	146980000	110070000	133820000	116460000	119210000	108470000	161180000	153910000	109960000	110140000	153960000
Q86UA3	C12orf10	UPF0160 protein MYG1, mitochondrial	10	2431900000	97	110640000	137030000	79131000	72639000	68119000	111700000	47164000	0	75919000	150960000	209800000	219800000	183610000	169680000	178640000	184450000	167160000	214450000	294960000	174320000
Q9UEH5	NDUFV2	NADH dehydrogenase [ubiquinone] flavoprotein 2, mitochondrial	9	2431900000	112	134430000	128870000	131510000	144760000	139480000	142620000	109250000	131740000	151200000	121630000	148510000	148470000	192120000	163850000	156230000	129610000	118670000	110940000	110180000	130080000
B4E3D9	CDK11B	Cyclin-dependent kinase 11B	19	2430500000	194	184710000	162430000	158440000	161780000	167800000	155580000	153250000	137890000	159660000	143040000	104800000	119020000	113120000	107310000	92484000	106600000	102490000	110890000	100300000	111720000
A6NL93	HMGN1	Non-histone chromosomal protein HMG-14	5	2430200000	99	115050000	97146000	94731000	133020000	111990000	164480000	138530000	159470000	146730000	176870000	89338000	132880000	128360000	149230000	139610000	117690000	129150000	126650000	162750000	180550000
A8K287	SNAP23	Synaptosomal-associated protein	11	2425500000	135	137170000	131750000	117140000	120680000	134060000	187610000	151910000	140000000	147360000	96075000	141950000	129280000	121420000	138260000	121040000	139990000	146040000	92476000	134610000	151100000
Q969U7	PSMG2	Proteasome assembly chaperone 2	7	2421300000	128	106280000	0	132770000	115630000	156310000	109730000	122360000	91530000	0	125070000	147260000	186320000	136490000	150570000	137440000	169820000	163150000	123180000	119690000	211360000
A0A024RCG3	CARS	Cysteine--tRNA ligase, cytoplasmic	27	2419200000	182	86388000	92153000	0	48934000	80317000	273010000	298190000	271570000	219090000	264520000	98345000	83798000	76604000	112450000	89000000	101730000	90808000	135180000	140960000	100270000
A0A024R7W9	COPS5	COP9 signalosome complex subunit 5	13	2416000000	159	145030000	133530000	144880000	125710000	126840000	106470000	134160000	127700000	109370000	121770000	181820000	162330000	155480000	170560000	118000000	116420000	131700000	123400000	133330000	122910000
P49750	YLPM1	YLP motif-containing protein 1	25	2404500000	242	144230000	147790000	123540000	141600000	156460000	174080000	129760000	161410000	123840000	150790000	116680000	133460000	102350000	116070000	121490000	119330000	130870000	112330000	134500000	131600000
B4DR80	STK24	Serine/threonine-protein kinase 24	17	2402900000	144	99409000	72529000	74474000	0	85212000	131230000	109640000	119880000	69639000	129490000	229790000	159140000	141400000	124590000	134660000	158050000	262160000	168230000	251330000	169240000
Q9HA77	CARS2	Probable cysteine--tRNA ligase, mitochondrial	15	2401500000	94	0	0	0	0	0	0	0	49668000	0	0	247730000	304070000	283950000	265270000	265560000	169460000	140000000	195480000	188860000	168480000
Q5JPT6	SH3KBP1	SH3 domain-containing kinase-binding protein 1	24	2398100000	187	17776000	0	20241000	15140000	0	25075000	62125000	165640000	91731000	89467000	300690000	103480000	201330000	197630000	221630000	275260000	270780000	171470000	353680000	169020000
Q59EI3	BCKDHA	2-oxoisovalerate dehydrogenase subunit alpha, mitochondrial	9	2396000000	101	186770000	156440000	180060000	178610000	201170000	177200000	167170000	229340000	179830000	178430000	99779000	77786000	71168000	71420000	132440000	62370000	72501000	63571000	71767000	0
Q96EE3	SEH1L	Nucleoporin SEH1	11	2394400000	192	111710000	120680000	129290000	152340000	133740000	154570000	143130000	154390000	146780000	145380000	134360000	125710000	126520000	119310000	140070000	141750000	140070000	127610000	115470000	119170000
A0A024QZJ4	MYH11	Myosin-11	74	2393900000	202	0	0	0	0	0	0	0	0	0	0	534920000	524380000	553720000	566410000	565610000	0	0	0	0	0
O95456	PSMG1	Proteasome assembly chaperone 1	12	2393600000	114	112040000	97578000	109660000	99414000	102790000	0	113390000	78920000	90041000	88112000	206670000	188330000	169910000	177940000	171730000	199460000	202110000	124430000	133130000	202840000
Q9H845	ACAD9	Acyl-CoA dehydrogenase family member 9, mitochondrial	18	2377500000	206	132520000	158250000	143590000	137720000	152210000	149540000	101700000	149940000	124610000	123830000	157400000	137580000	150940000	127500000	140350000	108870000	117710000	127210000	126290000	118600000
Q5TDG3	WDR3	WD repeat-containing protein 3	27	2377400000	197	164050000	168440000	159420000	172670000	180190000	160940000	157190000	136430000	169840000	139970000	90092000	104390000	112580000	113200000	99526000	119140000	112270000	85876000	90734000	113320000
A0A384MTQ5	LSS	Lanosterol synthase	20	2374300000	207	131640000	150330000	131210000	132940000	133190000	125720000	148470000	154830000	114790000	128200000	150860000	145370000	154900000	150190000	154040000	86078000	109190000	124830000	146480000	102150000
Q86Z22	HEL-S-297	SH3 domain-binding glutamic acid-rich-like protein 3	4	2373200000	89	124520000	98888000	95076000	103430000	106090000	96755000	107010000	98183000	88425000	120930000	141730000	115680000	145650000	175460000	197000000	169090000	167970000	214250000	209480000	138730000
A0A024R745	NDUFA5	NADH dehydrogenase [ubiquinone] 1 alpha subcomplex subunit 5	4	2370300000	103	166670000	171250000	187900000	156440000	182580000	128370000	150160000	179510000	169110000	165000000	104570000	104340000	106930000	111270000	85035000	85526000	0	88553000	87349000	70597000
Q9GZS3	WDR61	WD repeat-containing protein 61	13	2363000000	145	149380000	137410000	152980000	151910000	150790000	150610000	155560000	132780000	126860000	163000000	108300000	117030000	117990000	79805000	133790000	112490000	116230000	121800000	124230000	103660000
Q8TCS8	PNPT1	Polyribonucleotide nucleotidyltransferase 1, mitochondrial	26	2360400000	245	166380000	165420000	166810000	153850000	160400000	90214000	137190000	137590000	166260000	130620000	79752000	89617000	103490000	89117000	94129000	135770000	134980000	125940000	128430000	157210000
Q9NPK3	SKIV2L	Helicase SKI2W	26	2354900000	243	140030000	128160000	128290000	134700000	142180000	128020000	146780000	149730000	134900000	160510000	138180000	118040000	118300000	129800000	118370000	107440000	107730000	129150000	136190000	114590000
Q96P70	IPO9	Importin-9	23	2354500000	234	180020000	206120000	189120000	206720000	180150000	67325000	103860000	85811000	121030000	57255000	127830000	126610000	159810000	165790000	163150000	89905000	95517000	71533000	98875000	96248000
Q9NWH9	SLTM	SAFB-like transcription modulator	11	2354500000	156	168860000	143870000	139010000	160180000	152230000	165070000	135110000	167550000	159980000	171160000	104840000	98975000	81178000	105910000	100150000	112040000	122940000	99466000	102130000	93092000
Q7Z4V5	HDGFRP2	Hepatoma-derived growth factor-related protein 2	10	2352700000	82	132290000	127610000	116110000	98494000	120420000	122250000	0	136790000	120020000	114530000	99314000	162130000	195630000	146980000	121550000	190090000	203800000	143970000	187790000	120050000
A8K719	CBFB		6	2345700000	113	114510000	141130000	132330000	123660000	118950000	143560000	149580000	126830000	137930000	176150000	87323000	78642000	128680000	114970000	87528000	175700000	140860000	129170000	134920000	158550000
Q9NZT2	OGFR	Opioid growth factor receptor	13	2344400000	169	106160000	111240000	117860000	125230000	133970000	138250000	149220000	144430000	125460000	152730000	153690000	139410000	142220000	142280000	134140000	130530000	128460000	115360000	130180000	142110000
A0A024R5J6	CHCHD8	Cytochrome c oxidase assembly factor 4 homolog, mitochondrial	4	2332300000	51	154770000	156320000	166710000	0	152900000	0	0	116940000	0	0	167000000	210570000	186480000	188170000	168870000	137590000	112210000	100700000	107080000	128120000
A0A2R8Y430	HEL-S-64p	Glutathione synthetase	14	2331900000	145	160380000	152350000	156960000	148980000	169260000	143200000	133610000	147830000	141620000	158910000	126240000	112800000	137890000	129870000	115360000	78427000	97289000	88864000	101850000	69025000
P30154	PPP2R1B	Serine/threonine-protein phosphatase 2A 65 kDa regulatory subunit A beta isoform	20	2331200000	200	153160000	162280000	157270000	141310000	160550000	141700000	119380000	116620000	139970000	130500000	101460000	115560000	107220000	91262000	104990000	137800000	141010000	96387000	94081000	156920000
A0A024R753	RBM28	RNA-binding protein 28	14	2328000000	181	139550000	154380000	162360000	162130000	158040000	137890000	107440000	93588000	111750000	129510000	127500000	117420000	123820000	128060000	112850000	131710000	126950000	118150000	125970000	149870000
A0A024R3V8	TSNAX	Translin-associated protein X	15	2325200000	163	183400000	172400000	174360000	187540000	183560000	174580000	172350000	169200000	158090000	156180000	65298000	55269000	37807000	46941000	62729000	101420000	93329000	94243000	104860000	95898000
Q7KZ85	SUPT6H	Transcription elongation factor SPT6	27	2321400000	150	166260000	146330000	127420000	133750000	150750000	157400000	134450000	98798000	130570000	131440000	112040000	120640000	121430000	131430000	102730000	151340000	132540000	111780000	93960000	126670000
A0A0S2Z381	ADA	Adenosine deaminase	14	2309500000	117	221290000	183040000	162800000	184410000	176430000	211830000	305220000	286190000	305010000	216070000	0	0	0	0	0	0	0	75276000	58649000	0
Q07812	BAX	Apoptosis regulator BAX	8	2308000000	131	97494000	93907000	95026000	96488000	95526000	95651000	95724000	97700000	89265000	106600000	153580000	147130000	159830000	161160000	148550000	184670000	193600000	177180000	193660000	144950000
E9PJ81	UBXN1	UBX domain-containing protein 1	10	2307400000	104	133990000	157560000	143430000	117220000	167110000	182410000	145270000	145830000	141910000	153450000	83990000	76452000	93748000	96422000	97940000	105500000	109310000	104200000	113050000	113200000
Q8IX12	CCAR1	Cell division cycle and apoptosis regulator protein 1	16	2303000000	155	127620000	136310000	143190000	135950000	133760000	156750000	136200000	154490000	119400000	174780000	108040000	123200000	83557000	108700000	113280000	125320000	116310000	122950000	136540000	124870000
Q9ULZ3	PYCARD	Apoptosis-associated speck-like protein containing a CARD	10	2296900000	110	253370000	268920000	215890000	202810000	243770000	172190000	197050000	178550000	163520000	201700000	21921000	26992000	31083000	48165000	0	50345000	42954000	32052000	58014000	21330000
A0A024R0L6	PAFAH1B3	Platelet-activating factor acetylhydrolase IB subunit gamma	7	2295600000	106	160420000	136410000	138940000	161820000	142050000	114190000	117020000	131820000	98155000	110530000	86796000	103940000	102460000	104810000	95410000	146390000	159080000	123570000	170480000	163160000
Q9P2A4	ABI3	ABI gene family member 3	12	2294600000	138	91899000	110350000	86798000	94390000	83172000	126860000	140870000	140170000	111550000	109040000	143410000	155180000	146840000	150640000	162120000	136000000	160090000	125270000	149740000	154510000
O00629	KPNA4	Importin subunit alpha-3	15	2291700000	136	56807000	26234000	0	77052000	0	0	76805000	0	122820000	49548000	287290000	181000000	207980000	175520000	269960000	208930000	167940000	221650000	209540000	196990000
Q6FHY4	NAPG	Gamma-soluble NSF attachment protein	15	2289700000	132	129270000	158650000	145890000	133510000	126770000	110440000	103330000	122290000	104950000	144880000	171730000	175950000	136600000	167220000	145070000	117030000	73851000	94966000	100070000	109570000
Q04446	GBE1	1,4-alpha-glucan-branching enzyme	15	2279600000	146	85821000	64407000	98299000	97673000	123820000	257640000	255120000	319500000	149110000	288570000	92216000	79132000	63935000	75116000	74269000	55413000	77816000	95850000	94543000	55923000
P62310	LSM3	U6 snRNA-associated Sm-like protein LSm3	3	2279000000	66	111250000	131360000	129820000	112810000	109330000	131100000	164750000	143720000	142790000	0	130170000	116720000	130410000	111140000	134320000	170450000	169500000	137780000	163880000	166230000
P35251	RFC1	Replication factor C subunit 1	17	2264000000	230	117450000	120320000	115290000	131000000	122360000	132100000	122480000	102650000	137340000	128990000	129440000	124170000	115140000	109650000	107880000	158420000	149460000	89923000	94046000	150500000
A0A024R3Z2	SUMO1	Small ubiquitin-related modifier 1	4	2253100000	61	137540000	144320000	150160000	0	0	146980000	118490000	0	0	0	111820000	174550000	195620000	176850000	182660000	208940000	228110000	127760000	117890000	157550000
Q15785	TOMM34	Mitochondrial import receptor subunit TOM34	13	2252400000	177	137540000	123890000	116210000	112010000	127410000	98930000	89154000	41544000	92114000	92673000	155890000	145170000	152190000	144610000	156440000	148400000	159680000	101930000	106080000	165090000
Q8IYS1	PM20D2	Peptidase M20 domain-containing protein 2	13	2252000000	124	95698000	0	99147000	0	0	123220000	90654000	104850000	140230000	122190000	144820000	171010000	125210000	164800000	153980000	169650000	178680000	158340000	184450000	150330000
E9PJK1	CD81	Tetraspanin	3	2241000000	122	113240000	83907000	102170000	104310000	99770000	159160000	163380000	148060000	165410000	107050000	113500000	96426000	106390000	116450000	107430000	139830000	131700000	118690000	120120000	172620000
A0A0S2Z5U6	PYCR2	Pyrroline-5-carboxylate reductase 2	10	2237400000	135	125200000	100480000	109580000	96603000	82781000	174650000	165100000	162400000	204040000	155880000	105500000	88926000	111820000	111650000	97794000	133640000	120130000	132400000	111290000	106220000
Q9BZK7	TBL1XR1	F-box-like/WD repeat-containing protein TBL1XR1	16	2232700000	183	86879000	79446000	91550000	90615000	71086000	84872000	118240000	102420000	94259000	102820000	164370000	116850000	164040000	146230000	143340000	187270000	219790000	167040000	174350000	164970000
B4DRG7	NCAPH	Condensin complex subunit 2	17	2225300000	175	121910000	134670000	109530000	131850000	138190000	160370000	115800000	61910000	141390000	157780000	105540000	104330000	115340000	112080000	116460000	151820000	149350000	81022000	93866000	132130000
Q71DI3	HIST2H3A	Histone H3.2	6	2220000000	34	0	0	0	0	0	0	0	0	100940000	0	280910000	132150000	93800000	82309000	141710000	175530000	137570000	582110000	256650000	91539000
A0A024R896	SH3GLB2	Endophilin-B2	11	2209600000	123	78423000	115660000	114460000	78950000	102600000	126820000	117220000	124330000	104310000	81155000	180580000	153620000	152000000	158000000	169410000	150630000	134300000	119400000	164880000	134560000
Q7Z4Y4	AK3	GTP:AMP phosphotransferase AK3, mitochondrial	12	2206600000	132	114750000	102120000	0	76284000	143480000	130110000	93757000	146490000	154080000	127080000	113580000	118910000	141690000	151180000	133730000	154720000	155100000	164090000	186980000	133920000
Q6MZZ4	DKFZp686H0575	ETS-related transcription factor Elf-1	10	2196300000	157	113120000	117950000	121230000	109980000	0	140530000	124060000	102820000	118940000	146300000	127770000	125780000	131040000	125600000	117160000	172440000	168670000	139310000	142070000	163850000
P35658	NUP214	Nuclear pore complex protein Nup214	35	2194800000	248	117150000	44954000	69967000	89860000	112300000	0	110920000	129050000	73543000	133190000	157920000	190800000	126340000	152040000	132210000	177460000	201930000	167080000	167160000	143490000
A0A024R306	CCDC72	Translation machinery-associated protein 7	2	2181200000	63	110660000	150800000	80211000	120920000	116480000	116170000	128050000	193720000	101440000	107570000	56358000	57202000	47936000	44304000	66343000	75660000	67511000	30140000	46807000	63149000
B5BU99	YTHDF2	YTH domain-containing family protein 2	12	2180100000	112	122520000	100440000	109130000	86101000	122010000	190460000	135860000	107140000	137970000	151610000	117950000	110360000	107450000	120310000	120760000	122900000	141670000	83734000	72829000	163870000
Q9UBS4	DNAJB11	DnaJ homolog subfamily B member 11	7	2175500000	142	109000000	121780000	132240000	101170000	119430000	100070000	118440000	96960000	120500000	105510000	119420000	141120000	132800000	130810000	136960000	115930000	115300000	160890000	141500000	147490000
G5E9L0	ARFGAP2	ADP-ribosylation factor GTPase-activating protein 2	12	2172300000	156	179470000	177280000	159440000	170550000	165050000	129260000	140090000	130290000	134780000	185550000	72434000	90977000	83825000	62684000	64260000	89541000	88670000	55777000	71881000	82919000
Q9BWJ5	SF3B5	Splicing factor 3B subunit 5	3	2164200000	73	114870000	124930000	104620000	106980000	116440000	112210000	76957000	118110000	105090000	95811000	123540000	111490000	123230000	107810000	121790000	138930000	165730000	116780000	118500000	149580000
D3DXC9	SHMT1	Serine hydroxymethyltransferase	16	2159500000	169	79832000	86426000	95405000	93791000	85076000	94180000	72739000	126620000	88154000	120410000	151180000	157020000	141620000	147030000	144290000	186120000	186910000	155910000	139710000	151800000
Q9NTJ5	SACM1L	Phosphatidylinositide phosphatase SAC1	15	2153700000	181	128510000	115240000	127470000	131580000	119210000	138770000	83310000	99874000	113480000	63029000	96194000	107140000	121090000	135760000	125910000	133400000	120120000	170070000	137060000	185880000
P07919	UQCRH	Cytochrome b-c1 complex subunit 6, mitochondrial	4	2144500000	128	109420000	86811000	79728000	64373000	86688000	114110000	105070000	86667000	100890000	94291000	163270000	137120000	118440000	134780000	117760000	75449000	60970000	142640000	123740000	103470000
Q9H6R4	NOL6	Nucleolar protein 6	14	2143600000	182	157210000	143090000	144500000	140960000	132650000	159520000	129250000	148440000	133300000	151870000	76536000	102640000	97127000	91629000	81668000	78132000	88171000	103480000	89980000	111130000
Q9NQC3	RTN4	Reticulon-4	13	2142200000	117	0	69479000	58151000	0	83526000	108210000	86411000	116930000	0	74602000	164460000	166720000	182610000	145580000	202510000	186310000	157690000	244730000	181240000	203970000
A0A0C4DGS1	DDOST	Dolichyl-diphosphooligosaccharide--protein glycosyltransferase 48 kDa subunit	11	2141700000	130	97915000	82198000	113380000	114690000	103610000	96674000	122730000	110160000	135110000	74395000	90529000	87221000	127870000	134040000	136720000	125030000	138390000	216230000	136610000	182610000
D3DRH1	DOCK8	Dedicator of cytokinesis protein 8	38	2141600000	232	185410000	172290000	154700000	146500000	129830000	152360000	129830000	138350000	161710000	153430000	22816000	0	48009000	34108000	0	145730000	114050000	139770000	151440000	161420000
Q9BVG4	PBDC1	Protein PBDC1	10	2131300000	111	121550000	0	136040000	120590000	126910000	108770000	125880000	116560000	84038000	115320000	124390000	134100000	110040000	105570000	102270000	147910000	155910000	142070000	156060000	134060000
Q15814	TBCC	Tubulin-specific chaperone C	11	2129600000	146	220430000	201620000	221790000	212280000	205990000	75548000	66447000	80901000	71518000	118450000	114970000	121980000	101200000	123750000	106000000	57162000	55255000	41585000	50076000	33086000
A0A0S2Z3H3	SLC25A4	ADP/ATP translocase 1	15	2124800000	95	121590000	97544000	121550000	114220000	110920000	114170000	83533000	103890000	95173000	63400000	103210000	131360000	147080000	135950000	138660000	105100000	110030000	213660000	135000000	128400000
A0A024R325	SUCLG2	Succinyl-CoA ligase subunit beta	17	2124700000	181	93732000	122790000	113530000	102520000	98088000	95474000	95213000	120900000	108100000	107300000	103710000	108940000	133190000	140860000	144660000	138170000	124380000	190400000	185190000	109010000
Q9BXW7	CECR5	Cat eye syndrome critical region protein 5	12	2123600000	176	97405000	72689000	122860000	90256000	106470000	88139000	97206000	129520000	103290000	105470000	108570000	116800000	132490000	121660000	148750000	159020000	152580000	161060000	175620000	124910000
O15160	POLR1C	DNA-directed RNA polymerases I and III subunit RPAC1	10	2120900000	149	151460000	151750000	152410000	157610000	147300000	115330000	102950000	90653000	125720000	115950000	118410000	103970000	115670000	118370000	104270000	106600000	97454000	84926000	79249000	101620000
A0A384MDT9	GLRX5	Glutaredoxin-related protein 5, mitochondrial	3	2120600000	124	132580000	123150000	140590000	116840000	132250000	113590000	126300000	145600000	131680000	121160000	113410000	103100000	128210000	109910000	108680000	113910000	96063000	89293000	104860000	112670000
A0A024R7S3	CLTB	Clathrin light chain B	7	2118800000	69	125480000	118850000	107630000	0	113110000	143280000	145030000	176690000	128730000	153480000	101020000	118350000	110970000	123060000	112230000	97350000	110800000	79680000	123120000	103790000
P28907	CD38	ADP-ribosyl cyclase/cyclic ADP-ribose hydrolase 1	13	2110100000	136	48195000	0	0	0	0	0	44657000	115290000	76510000	0	281530000	230600000	229450000	218350000	233280000	221370000	157330000	72839000	125820000	283180000
A0A024RBV2	AACS	Acetoacetyl-CoA synthetase	15	2104900000	135	105650000	98468000	99059000	94301000	90481000	110960000	113590000	130270000	70221000	104760000	161740000	127520000	158890000	164220000	135260000	109600000	125490000	129180000	132190000	138330000
G3V529	DDX24	ATP-dependent RNA helicase DDX24	21	2103900000	190	146980000	175390000	120490000	131570000	174400000	63650000	116030000	0	122530000	151830000	102380000	114050000	126170000	82644000	125120000	124440000	107460000	127540000	109390000	106780000
Q92804	TAF15	TATA-binding protein-associated factor 2N	8	2103700000	102	116730000	115150000	100080000	121400000	111280000	120890000	141800000	135750000	158740000	138430000	114130000	104250000	114390000	93746000	91491000	134970000	127770000	76638000	100710000	104230000
Q8WUM0	NUP133	Nuclear pore complex protein Nup133	26	2102000000	225	100260000	110490000	100020000	102310000	102940000	126270000	127460000	137570000	137960000	145230000	114480000	113420000	109910000	108980000	109890000	110410000	119660000	112240000	112110000	119090000
P49005	POLD2	DNA polymerase delta subunit 2	13	2097000000	157	137670000	142160000	137840000	152530000	149670000	150540000	128270000	165890000	151490000	144010000	77069000	90944000	75133000	70266000	75627000	119900000	99359000	50265000	69262000	122400000
A0A024RBA9	RAB21	Ras-related protein Rab-21	11	2088200000	112	0	54042000	51015000	53766000	51104000	0	62629000	0	42821000	0	163230000	133790000	176150000	130450000	169650000	199450000	110720000	404200000	257380000	205950000
D3DSW3	PROSC	Proline synthase co-transcribed bacterial homolog protein	9	2087300000	102	93891000	80083000	80640000	75302000	79511000	69171000	69408000	101760000	93323000	74935000	150100000	155730000	121570000	155330000	124920000	167320000	164240000	178320000	201440000	177180000
Q13501	SQSTM1	Sequestosome-1	10	2085100000	149	142790000	156920000	108420000	139350000	115890000	176710000	169040000	138760000	140930000	171700000	77853000	69265000	72457000	83225000	88073000	84532000	88394000	93361000	89974000	85602000
A8K761	NDUFB10	NADH dehydrogenase [ubiquinone] 1 beta subcomplex subunit 10	8	2083900000	114	145730000	120780000	118210000	127450000	126080000	106930000	111180000	112780000	124190000	102190000	124200000	128160000	132560000	112580000	138740000	98966000	100310000	118470000	80984000	104860000
Q9Y263	PLAA	Phospholipase A-2-activating protein	22	2081500000	229	122570000	136570000	128170000	134280000	134730000	132540000	116720000	101340000	129220000	127160000	105330000	109120000	109180000	100180000	109040000	95015000	92825000	91870000	66363000	103790000
F5GX77	TRMT112	Multifunctional methyltransferase subunit TRM112-like protein	4	2080300000	83	152680000	144900000	142110000	135470000	0	135330000	140190000	130630000	157480000	92291000	90077000	103560000	91959000	100190000	70489000	128000000	117600000	108120000	74795000	154780000
A0A023I930	ATP6	ATP synthase subunit a	2	2079400000	24	0	0	0	0	0	0	0	0	0	0	0	0	162860000	0	0	0	0	0	0	0
A0A024RAV0	BCAT1	Branched-chain-amino-acid aminotransferase	13	2078400000	118	39361000	45142000	34195000	30412000	0	0	0	0	0	0	172490000	204400000	199090000	213290000	243780000	258930000	260690000	222600000	215170000	280710000
P60602	ROMO1	Reactive oxygen species modulator 1	2	2077700000	42	222530000	0	0	0	0	0	0	175830000	185240000	110050000	0	72713000	90234000	82199000	92687000	78288000	0	82724000	67987000	82104000
CON__Q3T052			6	2077100000	18	0	0	0	0	0	0	0	0	333480000	0	0	0	0	0	0	0	0	0	0	0
Q8TDN6	BRIX1	Ribosome biogenesis protein BRX1 homolog	12	2076700000	140	123970000	142520000	149000000	158150000	147870000	115230000	101080000	101980000	121400000	106350000	100760000	97249000	100330000	71056000	97621000	102120000	116860000	114300000	96166000	80772000
Q06124	PTPN11	Tyrosine-protein phosphatase non-receptor type 11	20	2071500000	198	119940000	118730000	109780000	115460000	112110000	131200000	131060000	130800000	124710000	137380000	106410000	127230000	108920000	98542000	94930000	105500000	98924000	121640000	133470000	116800000
A0A024R8L0	MRPS7	28S ribosomal protein S7, mitochondrial	14	2070500000	127	170560000	168170000	154350000	137730000	167850000	124120000	113750000	113920000	137380000	113160000	95467000	101540000	96468000	113910000	99003000	82662000	71550000	68541000	67325000	83343000
B4DFR2	DYNLRB1	Dynein light chain roadblock-type 1	5	2069100000	87	129780000	81127000	130660000	121520000	123250000	95759000	162070000	117390000	125250000	137930000	141910000	107010000	106700000	97322000	126850000	89757000	104960000	86326000	77243000	109650000
B4DNJ7	IMPDH	Inosine-5-monophosphate dehydrogenase	17	2065800000	130	136120000	109370000	90642000	95276000	100720000	81752000	66543000	0	97684000	0	211640000	162990000	157080000	148410000	229050000	109450000	130410000	104520000	102740000	95148000
B2R5T5	PRKAR1A	cAMP-dependent protein kinase type I-alpha regulatory subunit	15	2065700000	132	0	0	0	0	0	0	0	0	0	0	249410000	235610000	202830000	230840000	231030000	228770000	255230000	239550000	313320000	242440000
F6WIT2	PPP2R4	Serine/threonine-protein phosphatase 2A activator	7	2064600000	101	101680000	104170000	101510000	94252000	124760000	126100000	120890000	141330000	114770000	143640000	120100000	133330000	98097000	103720000	114420000	115270000	126470000	102010000	130050000	94830000
Q53XX5	CIRBP	Cold-inducible RNA-binding protein	4	2063200000	67	0	114810000	100880000	117310000	119430000	115100000	0	0	0	101350000	96887000	95599000	130480000	126120000	128220000	169840000	174660000	194060000	149670000	170520000
Q96DP0			12	2058700000	71	126830000	199430000	211310000	152810000	196480000	168100000	131000000	170930000	166110000	137800000	69003000	66965000	70728000	60120000	65725000	63351000	0	54432000	54424000	49505000
P54105	CLNS1A	Methylosome subunit pICln	6	2057300000	83	177480000	174550000	157920000	160540000	138480000	115000000	124960000	93103000	154520000	111880000	101320000	75082000	75554000	76613000	85150000	120100000	0	49870000	0	135220000
Q9NQG5	RPRD1B	Regulation of nuclear pre-mRNA domain-containing protein 1B	13	2056700000	158	114970000	136880000	124910000	125060000	126380000	117860000	106290000	130350000	119770000	142580000	86281000	82998000	94214000	89178000	96881000	118950000	105080000	121620000	132360000	105880000
B4DTN0	RB1	Retinoblastoma-associated protein	23	2055600000	143	0	78565000	54017000	95181000	0	72615000	0	0	0	44924000	200980000	183370000	185840000	207400000	167390000	315610000	273900000	64377000	111160000	305510000
A0A024R471	COPS7B	COP9 signalosome complex subunit 7b	8	2055100000	95	0	182690000	0	0	163730000	0	0	0	0	69139000	179210000	192340000	155070000	190900000	180400000	182740000	173760000	160860000	182530000	189770000
P06132	UROD	Uroporphyrinogen decarboxylase	14	2051400000	130	172790000	173070000	180780000	167990000	165790000	69948000	60534000	72372000	74597000	82949000	152520000	126900000	124590000	106850000	111030000	88143000	90920000	58015000	75095000	85430000
A0A024R819	NUDT1	7,8-dihydro-8-oxoguanine triphosphatase	6	2048100000	98	66559000	72119000	56751000	63765000	73455000	98505000	85722000	104440000	86867000	93407000	115290000	82866000	120590000	106950000	125790000	177830000	158770000	107400000	152480000	139270000
A0A024R1U2	PHF5A	PHD finger-like domain-containing protein 5A	5	2042500000	73	119180000	113470000	124850000	123200000	106180000	97014000	110850000	105130000	88098000	104450000	117420000	139200000	118010000	96869000	87697000	137050000	121380000	113140000	107160000	110880000
Q8WVY7	UBLCP1	Ubiquitin-like domain-containing CTD phosphatase 1	10	2042000000	139	142920000	150210000	138070000	144290000	153440000	164860000	137590000	147590000	131280000	166740000	59916000	92571000	71100000	85678000	60255000	74124000	95681000	73777000	65963000	72571000
Q6IAV3	SUI1	Eukaryotic translation initiation factor 1	9	2040400000	117	130640000	143040000	131200000	107670000	162790000	97802000	82993000	96344000	98025000	115840000	112420000	86769000	134340000	105940000	119460000	99868000	91368000	139630000	64796000	138720000
O00139	KIF2A	Kinesin-like protein KIF2A	18	2038100000	167	136220000	140190000	127830000	130420000	120570000	102090000	112670000	117260000	119170000	117130000	103390000	116090000	108430000	106500000	107230000	115790000	126590000	84436000	87861000	113030000
Q9NZB2	FAM120A	Constitutive coactivator of PPAR-gamma-like protein 1	27	2037700000	188	64286000	44301000	25357000	49979000	75654000	33583000	0	0	38984000	26044000	304840000	277650000	182100000	180410000	172130000	133210000	240140000	122150000	168660000	213020000
Q9Y3B4	SF3B6	Splicing factor 3B subunit 6	5	2037600000	81	131180000	120530000	137910000	117720000	122060000	99952000	101450000	124940000	115200000	122990000	116600000	84437000	0	105230000	104290000	127260000	134500000	107170000	112110000	118610000
Q8NAV1	PRPF38A	Pre-mRNA-splicing factor 38A	7	2024800000	116	119720000	134930000	120000000	130480000	110980000	135070000	119480000	129710000	144530000	139730000	82566000	98180000	99398000	72527000	73791000	104160000	103390000	84094000	100190000	94014000
A0A140VK39	PPME1	Protein phosphatase methylesterase 1	11	2018600000	132	111530000	116030000	138160000	130120000	118410000	123140000	128590000	125270000	97653000	143820000	109160000	121560000	117660000	109920000	131360000	76515000	72412000	94538000	87332000	61436000
B3KM97	TECR	Very-long-chain enoyl-CoA reductase	8	2018500000	110	80127000	0	79724000	71801000	74112000	0	74566000	80441000	99298000	89145000	103270000	103330000	150100000	163980000	105230000	161880000	171710000	198910000	174770000	193840000
Q7L0Y3	TRMT10C	Mitochondrial ribonuclease P protein 1	14	2014300000	148	159880000	156220000	136340000	138550000	157990000	139150000	112410000	151170000	155950000	120900000	77470000	88331000	83581000	85321000	78288000	70706000	84419000	53822000	57512000	82187000
Q8TDD1	DDX54	ATP-dependent RNA helicase DDX54	21	2013500000	163	155980000	160490000	128200000	155890000	165560000	97750000	125230000	121610000	122200000	152490000	67135000	61456000	54841000	55329000	88324000	92671000	96529000	66699000	81399000	103730000
F8VQE1	LIMA1	LIM domain and actin-binding protein 1	13	2011800000	141	126670000	121030000	150180000	33807000	61301000	0	0	0	0	84956000	214650000	210870000	185530000	188160000	191710000	166620000	167120000	83067000	126390000	166730000
C9JYN0	SYPL1		5	2009900000	84	119840000	0	83824000	86891000	0	98886000	79068000	0	104810000	71237000	128840000	135750000	123050000	115590000	92530000	0	91445000	147150000	130320000	144510000
Q07960	ARHGAP1	Rho GTPase-activating protein 1	13	2005100000	155	142110000	138940000	98002000	89073000	110690000	116880000	106570000	108010000	105210000	133040000	107150000	76907000	99138000	99618000	102000000	117490000	110990000	108590000	129090000	112640000
D6RAM3	DOK3	Docking protein 3	12	2003600000	156	118920000	123480000	118110000	127070000	116220000	117690000	136970000	157340000	132270000	132400000	97733000	89742000	74199000	84394000	81757000	78215000	94738000	124700000	129620000	85998000
Q6IAX9	SRPR	Signal recognition particle receptor subunit alpha	17	2003000000	177	45226000	0	61874000	45118000	63251000	94354000	39804000	88817000	103560000	0	132540000	128410000	125590000	140920000	114270000	205410000	220540000	241100000	170550000	296590000
Q9UDW1	UQCR10	Cytochrome b-c1 complex subunit 9	2	2000200000	57	96790000	104870000	116200000	106610000	122590000	117790000	109210000	123520000	120810000	100880000	94860000	119360000	153010000	141690000	139540000	90671000	70048000	134830000	111980000	88025000
Q9NRN7	AASDHPPT	L-aminoadipate-semialdehyde dehydrogenase-phosphopantetheinyl transferase	8	1995600000	117	141930000	132270000	155860000	133940000	144140000	156410000	161200000	152310000	161760000	179090000	70719000	64523000	72412000	57368000	60685000	0	85614000	59942000	73500000	73374000
B2R774	LMAN1	Protein ERGIC-53	12	1993600000	134	107450000	100850000	113350000	119890000	106130000	94269000	91783000	96141000	91382000	61577000	102040000	127070000	132680000	120560000	119620000	119250000	111180000	189690000	157980000	133780000
B2R791	PRPF3	U4/U6 small nuclear ribonucleoprotein Prp3	16	1991800000	175	133660000	128300000	116060000	111890000	143970000	136370000	130740000	126990000	109040000	134660000	99138000	91242000	102580000	108880000	85143000	69241000	100140000	58011000	90664000	106710000
A0A024R7G8	RAD23A	UV excision repair protein RAD23 homolog A	9	1988800000	63	134350000	133220000	111720000	0	130450000	133180000	125610000	121230000	0	149720000	56933000	70678000	107030000	126100000	100860000	128890000	128630000	121700000	137560000	109330000
P13674	P4HA1	Prolyl 4-hydroxylase subunit alpha-1	14	1983400000	117	148530000	57541000	160440000	128980000	143220000	190280000	174730000	179870000	169220000	167080000	67489000	86975000	74073000	72751000	87254000	70196000	54971000	49982000	53721000	43792000
B4DMD3	WBP11	WW domain-binding protein 11	11	1983000000	156	121880000	119250000	116680000	131390000	145690000	123190000	117330000	133560000	110800000	131510000	117580000	100310000	94987000	87220000	83155000	109980000	105410000	70092000	72904000	91523000
B2R7W0	MTHFD2	Bifunctional methylenetetrahydrofolate dehydrogenase/cyclohydrolase, mitochondrial	9	1979600000	106	120550000	118030000	126770000	109530000	116280000	125920000	94833000	112020000	143910000	96456000	115980000	105570000	132590000	102900000	108220000	108160000	98854000	115810000	78332000	118690000
Q9Y5K6	CD2AP	CD2-associated protein	17	1978300000	118	89506000	63171000	116490000	107200000	101320000	142960000	130590000	153290000	97536000	151050000	132090000	107460000	99099000	98493000	119770000	115130000	101220000	79972000	99024000	77898000
Q9C0I1	MTMR12	Myotubularin-related protein 12	12	1973200000	91	153160000	139710000	139440000	135680000	146500000	112040000	103280000	131670000	108640000	66131000	59407000	107950000	116640000	66057000	141740000	0	117800000	123920000	122990000	0
O94804	STK10	Serine/threonine-protein kinase 10	21	1969900000	183	75210000	90154000	79832000	93142000	51780000	58606000	94442000	114020000	95767000	105480000	139220000	114760000	116990000	110500000	110670000	144290000	147180000	142200000	146170000	162510000
Q9P287	BCCIP	BRCA2 and CDKN1A-interacting protein	8	1966400000	120	114230000	118370000	130340000	116540000	113140000	98422000	90173000	99825000	0	98313000	122380000	121190000	112470000	122640000	116090000	145440000	153270000	107060000	89281000	137580000
P61011	SRP54	Signal recognition particle 54 kDa protein	15	1966000000	160	140080000	139560000	126710000	122710000	134150000	100020000	119000000	131050000	132190000	132700000	86481000	72130000	93116000	85646000	83315000	81480000	75543000	92085000	101620000	77861000
A0A024R9D2	MTDH	Protein LYRIC	19	1963700000	181	120780000	80290000	78743000	124640000	100160000	119520000	83428000	59430000	120520000	70875000	63734000	79744000	145810000	130230000	109570000	146000000	129850000	192310000	132670000	164440000
F6RFD5	DSTN	Destrin	6	1961400000	103	108030000	114070000	123670000	94466000	98098000	120870000	129300000	158020000	124380000	129080000	103500000	158680000	86595000	107870000	95836000	67594000	61458000	72634000	97201000	91661000
Q9NWV4	C1orf123	UPF0587 protein C1orf123	5	1960100000	104	156050000	153550000	158280000	132200000	165930000	140510000	136910000	132230000	114220000	130070000	85845000	65764000	74150000	0	71064000	82627000	76336000	82544000	97185000	61088000
A0A0S2Z4B5	PPP3CA	Serine/threonine-protein phosphatase 2B catalytic subunit alpha isoform	12	1957100000	132	92189000	97565000	82830000	37555000	99399000	105170000	90543000	117470000	81534000	83307000	118910000	117380000	117240000	126170000	117030000	151970000	149750000	133540000	170860000	150810000
CON__P12763			5	1955600000	75	67171000	70297000	0	48105000	50963000	0	55765000	205700000	356620000	111110000	0	83188000	70327000	45361000	80110000	146970000	0	345430000	213630000	102460000
Q9NTX5	ECHDC1	Ethylmalonyl-CoA decarboxylase	10	1954900000	126	76286000	74959000	60172000	79040000	60597000	80616000	97155000	99017000	68396000	104610000	150630000	123480000	132290000	133860000	161780000	175500000	175460000	125310000	138510000	140770000
Q13895	BYSL	Bystin	16	1952300000	178	123200000	136280000	136310000	104030000	122540000	123750000	100710000	101650000	100210000	115740000	101020000	106300000	104090000	108270000	91302000	113670000	96348000	99004000	83267000	121210000
B4DWG1	SEC23IP	SEC23-interacting protein	15	1951300000	172	149410000	125460000	123300000	167420000	142970000	121690000	107380000	104670000	113550000	113110000	84822000	82958000	79401000	89737000	92995000	79462000	100710000	97051000	96611000	94465000
Q8WVJ2	NUDCD2	NudC domain-containing protein 2	6	1950000000	65	126700000	134040000	132250000	124050000	151120000	118970000	125380000	122930000	126390000	131750000	87338000	83141000	72478000	90548000	74692000	84126000	82628000	77841000	86107000	94190000
Q9BYD1	MRPL13	39S ribosomal protein L13, mitochondrial	10	1947200000	81	139880000	0	165000000	0	0	144750000	127530000	164060000	133760000	135140000	120810000	145900000	100480000	99723000	102650000	0	96365000	97490000	80705000	102810000
I6L9E8	FAM98A	Protein FAM98A	11	1946300000	145	139740000	134050000	128350000	131600000	95510000	92251000	85262000	69815000	117840000	112380000	124360000	143680000	117260000	111640000	120250000	97772000	90761000	86839000	59498000	78219000
B4E0X1	B2M	Beta-2-microglobulin	3	1941500000	70	93006000	78251000	94497000	0	84087000	157190000	127890000	93576000	133160000	113710000	27355000	0	56060000	0	76584000	0	82313000	111210000	124580000	111280000
O95202	LETM1	LETM1 and EF-hand domain-containing protein 1, mitochondrial	19	1938400000	185	73371000	53474000	71926000	75731000	78940000	83962000	35629000	55561000	69563000	52780000	119610000	112700000	205100000	158980000	169640000	119840000	104200000	195070000	152440000	178100000
A6NDY9	FLNA	Filamin-A	31	1937500000	180	304310000	213450000	180890000	273600000	241130000	224680000	110840000	56131000	177050000	68629000	37884000	54461000	0	0	0	39201000	0	0	0	69029000
A0A024R5X7	CLPX	ATP-dependent Clp protease ATP-binding subunit clpX-like, mitochondrial	18	1934100000	178	156420000	166260000	168600000	155230000	140820000	109420000	77416000	103600000	82651000	90628000	99985000	128980000	96371000	109470000	112700000	90741000	91572000	57177000	0	110020000
A8K818	CD3EAP		13	1933400000	145	127000000	135230000	124640000	128610000	122670000	98596000	103590000	105940000	95389000	111250000	90978000	97247000	94844000	92592000	96669000	117090000	112400000	75536000	81084000	94604000
Q6PL24	TMED8	Protein TMED8	7	1931400000	90	114580000	0	106130000	106060000	0	99508000	0	0	88983000	129170000	142290000	137080000	150420000	155760000	131270000	161850000	144860000	146370000	167730000	128490000
A0A024RD91	BRDG1	Signal-transducing adaptor protein 1	13	1929700000	117	40098000	64592000	37385000	0	57147000	0	57977000	39875000	56835000	66481000	271740000	235330000	178850000	194370000	237900000	122090000	107490000	147640000	114200000	135430000
B4DT15	ELAC2	Zinc phosphodiesterase ELAC protein 2	21	1928700000	181	131360000	131830000	137460000	113670000	128130000	55984000	70998000	88422000	85570000	100870000	88255000	102600000	81554000	87366000	89075000	138540000	119080000	84863000	77441000	171390000
Q15050	RRS1	Ribosome biogenesis regulatory protein homolog	11	1927900000	148	122130000	114540000	126790000	129850000	105150000	101520000	90282000	97809000	82378000	99438000	113090000	93593000	92877000	88954000	99019000	114620000	103560000	118660000	98203000	122390000
D3DUP2	WNK1	Serine/threonine-protein kinase WNK1	19	1925800000	165	88739000	96277000	96450000	89785000	93580000	141370000	136480000	174160000	101580000	154690000	71754000	85765000	83609000	82757000	93416000	109380000	122970000	94083000	125920000	111960000
Q99567	NUP88	Nuclear pore complex protein Nup88	14	1923600000	182	93718000	99969000	94550000	100950000	109190000	41407000	86590000	109440000	99477000	114130000	114420000	107460000	125250000	100070000	127290000	130680000	121700000	116850000	131360000	129350000
A0A024R6G5	TCL1A	T-cell leukemia/lymphoma protein 1A	5	1923000000	47	0	0	0	0	0	0	0	144000000	111280000	0	119200000	108060000	141070000	160600000	172560000	213690000	198280000	261590000	255960000	161730000
A8K9B9	EHD4	EH domain-containing protein 4	20	1922900000	125	0	0	0	0	0	0	0	0	0	0	240540000	242340000	197050000	245880000	244280000	232530000	229300000	210960000	217280000	242560000
Q5T8P6	RBM26	RNA-binding protein 26	16	1922000000	167	128480000	113740000	141380000	147120000	153610000	121580000	111800000	132920000	115230000	157790000	70413000	82922000	87358000	54677000	74810000	96665000	112730000	38805000	85420000	80414000
B4DEE8	MGMT	Methylated-DNA--protein-cysteine methyltransferase	7	1919300000	109	40548000	62452000	45190000	30014000	54195000	0	35846000	0	40965000	67512000	153650000	179800000	151660000	149310000	189290000	184740000	189540000	225640000	248030000	169530000
Q6PKC9	SFRS11	Serine/arginine-rich splicing factor 11	8	1917700000	115	103570000	125230000	122750000	119210000	121840000	115830000	123370000	111120000	112490000	125150000	81557000	80180000	89457000	74730000	90563000	95326000	113240000	71628000	84773000	93813000
Q12888	TP53BP1	Tumor suppressor p53-binding protein 1	29	1917200000	207	109310000	102510000	85975000	82467000	88373000	50791000	83790000	98527000	75608000	90426000	140130000	147220000	144200000	135060000	139190000	131360000	116950000	116040000	139680000	100250000
F5H5I6	GRSF1	G-rich sequence factor 1	13	1907400000	133	92434000	109750000	109780000	120680000	109550000	127260000	98813000	103980000	126850000	115540000	94415000	93261000	99780000	97967000	100410000	107070000	81726000	97423000	69603000	111950000
Q96FZ2	HMCES	Embryonic stem cell-specific 5-hydroxymethylcytosine-binding protein	13	1904600000	119	0	0	0	0	0	90537000	110980000	116610000	96789000	134980000	209590000	168370000	174180000	171230000	177250000	147170000	144140000	166950000	134600000	107570000
Q9NP72	RAB18	Ras-related protein Rab-18	8	1903400000	106	83736000	68860000	96225000	89024000	86717000	0	0	0	0	0	178960000	191030000	244460000	219780000	211980000	138090000	133340000	154640000	136910000	153120000
Q6P996	PDXDC1	Pyridoxal-dependent decarboxylase domain-containing protein 1	26	1901900000	169	106020000	61317000	102460000	81267000	60990000	0	0	118690000	64461000	55262000	185380000	138430000	194940000	152930000	200930000	147220000	148560000	126430000	99530000	86501000
A0A024R388	THUMPD1	THUMP domain-containing protein 1	12	1896400000	152	106400000	104760000	100580000	102880000	117090000	124970000	121500000	113030000	98590000	120750000	80756000	81383000	95434000	88098000	82497000	114900000	115680000	112770000	115030000	105820000
Q9H2U2	PPA2	Inorganic pyrophosphatase 2, mitochondrial	10	1895400000	95	55753000	62717000	60396000	52859000	0	110680000	78913000	91753000	98629000	90855000	72464000	102950000	119760000	110320000	143820000	152940000	160290000	232380000	237200000	124840000
[truncated: 3,369 more rows]
