# Supplementary material for: Changes of Protein Expression after CRISPR/Cas9 Knockout of miRNA-142 in Cell Lines Derived from Diffuse Large B-Cell Lymphoma
Source: Cancers (Basel). 2022 Oct 14;14(20):5031. doi: 10.3390/cancers14205031 (PMC9600116; doi:10.3390/cancers14205031)
Supplement: Supplementary file 1 [file cancers-14-05031-s001.zip › Supplementary Table S3.xlsx]

## Sheet: final ovelap sign
Protein names	Gene names	Significant BJAB	Log 2 Fold Change BJAB_KO_BJAB_WT	p-value BJAB_KO_BJAB_WT	q-value BJAB_KO_BJAB_WT	Significant SUDHL4	Log 2 Fold Change SUDHL4_KO_SUDHL4_WT	p-value SUDHL4_KO_SUDHL4_WT	q-value SUDHL4_KO_SUDHL4_WT	Uniprot Accession	Abundance	BJAB_KO1	BJAB_KO3	BJAB_KO4	BJAB_KO5	BJAB_KO6	BJAB_wt_1	BJAB_wt_2	BJAB_wt_3	BJAB_wt_4	BJAB_wt_6	SUDHL4_KO2	SUDHL4_KO3	SUDHL4_KO4	SUDHL4_KO5	SUDHL4_KO6	SUDHL4_wt1	SUDHL4_wt2	SUDHL4_wt3	SUDHL4_wt4	SUDHL4_wt5		onco/sup			Secretory factors
Cofilin-2	CFL2	+	3.64732	7.94012e-07	0	+	5.24144	1.68085e-08	0	Q549N0	More abundant in miR-142-KO	377150000	297460000	299640000	299100000	295980000	NaN	30905000	NaN	NaN	NaN	728190000	775900000	885340000	735260000	752710000	NaN	NaN	NaN	31039000	NaN	PMID:29342841/	o			-
Twinfilin-1	TWF1	+	0.776328	0.000298997	0.00121547	+	3.40523	1.93234e-06	0	Q12792	More abundant in miR-142-KO	230970000	222270000	240600000	224680000	235030000	150010000	125920000	99408000	142870000	164950000	205870000	226100000	203180000	198200000	197240000	NaN	NaN	NaN	NaN	NaN	https://elifesciences.org/articles/01964.pdf	o			-
Hydroxymethylglutaryl-CoA synthase, cytoplasmic	HMGCS1	+	0.449004	0.000405987	0.0015098	+	2.18862	0.000566942	0.0029781	Q8N995	More abundant in miR-142-KO	1235700000	1266900000	1453200000	1359900000	1372300000	1072900000	969849000	839510000	957550000	1070700000	743610000	576340000	575430000	645490000	607250000	155420000	156510000	141460000	51766000	275640000	PMID:32349352/	o			-
Serine/threonine-protein kinase N2	PKN2	+	2.08168	0.000206918	0.000658228	+	1.78856	0.00068849	0.00354362	Q16513	More abundant in miR-142-KO	62411000	77005000	87855000	63785000	82582000	NaN	NaN	NaN	NaN	NaN	79771000	87524000	68059000	65018000	73454000	NaN	NaN	NaN	NaN	NaN	PMID:29368606/	s			-
4-aminobutyrate aminotransferase, mitochondrial	ABAT	+	1.79157	0.000975685	0.0023	+	1.7834	0.001733	0.00662857	X5D8S1	More abundant in miR-142-KO	108660000	100660000	111700000	71973000	111890000	NaN	NaN	31219000	63205000	22802000	198250000	189270000	166920000	162440000	220690000	50265000	24970000	74634000	117760000	NaN	PMID:32093682/	s			+
COP9 signalosome complex subunit 7a	COPS7A	+	0.352034	0.026133	0.0352022	+	1.5223	0.00706683	0.0215783	Q9UBW8	More abundant in miR-142-KO	85350000	83550000	74001000	75488000	74917000	NaN	69936000	64157000	64337000	69024000	54157000	60756000	61327000	72846000	63106000	NaN	NaN	44959000	NaN	NaN	https://www.nature.com/articles/s41388-019-0934-z	o			-
Double-stranded RNA-binding protein Staufen homolog 1	STAU1	+	0.521432	0.000246036	0.000886228	+	1.51245	0.0163035	0.0398206	A8K622	More abundant in miR-142-KO	127410000	133110000	134770000	147130000	129900000	105690000	82263000	85447000	91465000	105510000	108490000	108110000	113280000	106780000	120480000	51909000	75449000	NaN	NaN	43288000	PMID:28004750/	s			-
Long-chain-fatty-acid--CoA ligase 1	ACSL1	+	0.304949	0.00301332	0.00531593	+	1.50148	1.2696e-05	0	A8K9T3	More abundant in miR-142-KO	490080000	504660000	507460000	471900000	464910000	421040000	349480000	451650000	397620000	362140000	348070000	466780000	469440000	435160000	457670000	113420000	135470000	187990000	158740000	182080000	https://doi.org/10.3390/ijms20153624	o			-
Endophilin-A2	SH3GL1	+	1.04553	2.06135e-06	0	+	1.43972	7.28601e-07	0	Q9UQD4	More abundant in miR-142-KO	248180000	201550000	205830000	201830000	197760000	103270000	101730000	114460000	87597000	104120000	225120000	220670000	212680000	231550000	232820000	91517000	88132000	85364000	89832000	62693000	PMID:27220321/	o			-
Heat shock factor-binding protein 1	HSBP1		1.24707	0.0388759	0.0507215	+	1.34647	0.0158946	0.0391383	O75506	More abundant in miR-142-KO	134280000	104290000	127920000	89679000	106060000	59713000	74872000	47625000	84263000	NaN	130810000	106720000	140770000	105820000	165010000	65927000	66898000	69095000	NaN	68288000	PMID:22804237/	o			-
Cytochrome c oxidase subunit NDUFA4	NDUFA4	+	1.2147	0.00206755	0.00364368		1.34155	0.0376057	0.0744698	A0A024R9Z0	More abundant in miR-142-KO	162440000	156660000	201260000	161410000	166760000	96459000	NaN	86005900	94279000	72593000	95567000	98411900	135540000	103310000	114160000	NaN	48388000	87255000	NaN	93285000	PMID:33314701/	o			-
Acetyl-CoA carboxylase 1;Biotin carboxylase	ACACA	+	1.1022	0.0374565	0.0491877	+	1.2893	0.0155873	0.0385721	Q13085	More abundant in miR-142-KO	95360100	72476000	60519000	102280000	87965000	59026000	49422000	NaN	NaN	68998000	137180000	118970000	117650000	133870000	113000000	75740000	57278000	19127000	39395000	101880000	PMID:29056512/	o			-
Tubulin-specific chaperone C	TBCC	+	1.39381	1.3353e-05	0	+	1.28374	3.72789e-05	0	Q15814	More abundant in miR-142-KO	220430000	201620000	221790000	212280000	205990000	75548000	66447000	80901000	71518000	118450000	114970000	121980000	101200000	123750000	106000000	57162000	55255000	41585000	50076000	33086000	PMID:31278033/	s			-
Isocitrate dehydrogenase [NADP];Isocitrate dehydrogenase [NADP] cytoplasmic	HEL-S-26	+	0.349434	0.0066924	0.0102893	+	1.27719	4.01404e-07	0	V9HWJ2	More abundant in miR-142-KO	208860000	201150000	208670000	220750000	239710000	179620000	180170000	193120000	137600000	160690000	429360000	428300000	417660000	440020000	437680000	174000000	173070000	164090000	222760000	160680000	PMID:31221981/	o			-
Chloride intracellular channel protein;Chloride intracellular channel protein 4	CLIC4	+	0.736019	1.16299e-05	0	+	1.25306	2.48577e-06	0	Q6FIC5	More abundant in miR-142-KO	423320000	364820000	416960000	377860000	408390000	238480000	269130000	211430000	222210000	257090000	1205600000	951670000	1009000000	1043500000	1131100000	481090000	413900000	487170000	502330000	364530000	PMID:22387366/	s			-
Endoplasmic reticulum resident protein 44	ERP44	+	0.172078	0.0180973	0.025465	+	1.22677	4.39199e-08	0	A0A384MEE7	More abundant in miR-142-KO	184530000	173180000	175050000	181480000	175760000	152580000	146590000	174340000	172090000	146460000	292440000	313070000	327760000	345220000	313100000	138060000	124390000	151430000	130130000	136490000	PMID:34493236/	o			+
ADP-ribosylation factor-like protein 3	ARL3	+	0.241739	0.00249601	0.0042865	+	1.2202	7.05998e-06	0	P36405	More abundant in miR-142-KO	189720000	196920000	198620000	184230000	172580000	175550000	156290000	148370000	153440000	163420000	172420000	188570000	198650000	176310000	193390000	95578000	87710000	75562000	83478000	60673000	PMID:31234870/	s			-
Oxysterol-binding protein-related protein 3	OSBPL3	+	1.02967	0.000990752	0.00231206	+	1.14161	1.95195e-06	0	Q9H4L5	More abundant in miR-142-KO	123690000	104590000	134460000	76054000	109510000	39777000	49593000	68624000	64654000	46672000	315200000	296260000	317860000	311180000	359980000	146990000	145270000	124320000	175530000	136500000	PMID:32709922/	o			-
Glia maturation factor beta	GMFB	+	0.409428	0.0120458	0.0171009	+	0.998693	2.53589e-05	0	P60983	More abundant in miR-142-KO	156010000	148400000	150100000	148600000	153140000	130100000	141190000	91933000	121180000	93506000	204520000	154550000	170610000	158250000	226380000	93045000	90825000	99293000	84092100	85948000	PMID:27655328/	s			-
Transferin receptor	TFRC	+	1.82201	0.00130146	0.00287043	+	0.968452	0.00123076	0.00495833	A8K6Q8	More abundant in miR-142-KO	412840000	442220000	431190000	472320000	372170000	167310000	159960000	96633000	200710000	48243000	440630000	491020000	568760000	554170000	526550000	274510000	266400000	304280000	161840000	347590000	PMID:32064157/	o			+
YTH domain-containing family protein 3	YTHDF3	+	1.16004	0.00732766	0.0111952	+	0.953996	0.00629179	0.0197531	Q8NA80	More abundant in miR-142-KO	49114000	70586000	61666000	56938000	49208000	NaN	NaN	NaN	39790000	36839000	56589000	49163000	47109000	49252000	44590000	31470000	35127000	NaN	NaN	34606000	PMID:32905518/	o			-
Ribosome maturation protein SBDS	SBDS	+	0.533023	2.76011e-05	0.000105263	+	0.94814	1.37278e-07	0	A0A0S2Z5I7	More abundant in miR-142-KO	346670000	355470000	356350000	357200000	346010000	228950000	220080000	253880000	238190000	280830000	352190000	356960000	333100000	358720000	354320000	192580000	201980000	166900000	170650000	179700000	PMID:31879230/	s			-
Heat shock 70 kDa protein 1B;Heat shock 70 kDa protein 1A	HSPA1A	+	0.708685	1.18382e-07	0	+	0.877383	3.61093e-07	0	A8K5I0	More abundant in miR-142-KO	2639200000	2840600000	2554000000	2561400000	2706400000	1736500000	1541900000	1639000000	1641000000	1580800000	1813900000	1759400000	1658600000	1764900000	1763700000	936090000	880920000	992790000	891620000	1078900000	PMID:32374522/	o			-
28S ribosomal protein S25, mitochondrial	MRPS25	+	0.563088	0.0129206	0.0183144		0.876672	0.0392537	0.0761246	P82663	More abundant in miR-142-KO	41403000	56352000	44863000	45422000	47727000	NaN	29817000	40464000	41501000	27499000	38525000	35424000	30199000	29836000	30153000	28261000	26163000	NaN	NaN	23385000	???				-
28S ribosomal protein S5, mitochondrial	MRPS5	+	0.291385	0.00978374	0.0147865		0.81738	0.0375812	0.0745479	P82675	More abundant in miR-142-KO	54960000	65976000	62566000	75369000	69880000	52420000	49113000	56754000	56741000	52499000	43166000	47651000	58716000	54805000	46496000	NaN	39358000	32113000	33539000	36099000	???				-
39S ribosomal protein L39, mitochondrial	MRPL39	+	0.166514	0.0331479	0.0430503		0.781911	0.0244294	0.0544609	Q9NYK5	More abundant in miR-142-KO	45932000	53592000	49631000	53921000	49172000	46733000	48721000	42571000	46305000	40526000	45650000	28535000	39026000	31057000	25887000	NaN	30580000	22646000	20646000	NaN	???				-
NAD kinase 2, mitochondrial	NADK2	+	0.792666	9.69724e-05	0.000377953	+	0.777996	0.00209135	0.00773451	Q4G0N4	More abundant in miR-142-KO	339910000	340200000	320030000	313130000	362620000	184750000	162240000	238100000	218900000	172440000	137790000	153070000	142720000	178250000	152380000	76710000	67397000	108830000	122390000	80087000	PMID: 33888598	mito			-
39S ribosomal protein L44, mitochondrial	MRPL44	+	0.691904	0.00707264	0.0107368	+	0.764471	0.00884511	0.0243526	A0A024R473	More abundant in miR-142-KO	56746000	43365000	56598000	42604000	47860000	31255000	34423000	34582000	36293000	NaN	35355000	38560000	37354000	41134000	30863000	NaN	30333000	NaN	21786000	27045000	PMID:25590838	o			-
Asparagine synthetase [glutamine-hydrolyzing]	ASNS	+	0.305325	0.00321831	0.00553846	+	0.762858	0.000414652	0.00252459	P08243	More abundant in miR-142-KO	388630000	456380000	412930000	407840000	406840000	316330000	358030000	291910000	343300000	371630000	670440000	598310000	539120000	553820000	570910000	365380000	388390000	306240000	266070000	420360000	PMID: 29316436	o			-
ADP-ribosylation factor 4	ARF4	+	0.692647	3.19477e-08	0	+	0.761308	6.77352e-06	0	P18085	More abundant in miR-142-KO	469110000	482360000	463430000	466970000	496110000	302030000	273410000	294270000	306010000	296220000	342610000	383510000	445410000	419490000	426590000	241020000	245250000	236600000	244570000	218830000	PMID: 33718142	o			-
Nuclear fragile X mental retardation-interacting protein 2	NUFIP2	+	0.496183	0.0123572	0.0177114		0.735851	0.0337414	0.0673921	Q7Z417	More abundant in miR-142-KO	163740000	144600000	166170000	114750000	145320000	140730000	106100000	87687000	91172900	98451000	72176000	62592000	51286000	58721000	44244000	33482000	NaN	NaN	NaN	63653000	???				-
Syntaxin-12	STX12	+	0.447066	0.000499874	0.00167568	+	0.721159	2.02561e-07	0	Q86Y82	More abundant in miR-142-KO	102410000	96781900	102480000	104250000	110610000	82173000	72409000	86591000	64682000	74639000	99897000	100940000	98641100	103840000	103460000	64912000	55632000	65343000	60637000	61344000	PMID: 32942643	o			-
Importin-9	IPO9	+	1.19478	0.000360654	0.00129231	+	0.716208	0.000379676	0.00237931	Q96P70	More abundant in miR-142-KO	180020000	206120000	189120000	206720000	180150000	67325000	103860000	85811000	121030000	57255000	127830000	126610000	159810000	165790000	163150000	89905000	95517000	71533000	98875000	96248100	PMID:29888431	o			-
Ras-specific guanine nucleotide-releasing factor RalGPS2	RALGPS2	+	1.87353	3.10661e-06	0	+	0.706329	0.00768597	0.0222363	Q86X27	More abundant in miR-142-KO	79746000	63047000	61877000	72412000	66424000	NaN	NaN	NaN	NaN	NaN	106540000	99341000	71347000	72833000	58294000	44064000	37748000	54430000	59977000	51055000	PMID: 23830877	o			-
Fructose-2,6-bisphosphatase TIGAR	TIGAR	+	1.53452	0.00422533	0.00698113	+	0.695675	3.79794e-06	0	Q9NQ88	More abundant in miR-142-KO	67089000	55101000	54604000	50064000	54465000	NaN	NaN	NaN	NaN	NaN	135180000	136340000	126280000	144010000	139240000	95661000	81478000	77591000	79628000	86952000	PMID: 31983610	o			-
Gamma-soluble NSF attachment protein	NAPG		0.250978	0.0494138	0.0638106	+	0.695169	0.000881929	0.00407273	Q6FHY4	More abundant in miR-142-KO	129270000	158650000	145890000	133510000	126770000	110440000	103330000	122290000	104950000	144880000	171730000	175950000	136600000	167220000	145070000	117030000	73851000	94966000	100070000	109570000	PMID: 21866343	s	possible		-
Protein transport protein Sec23A	SEC23A	+	0.466743	0.000107709	0.000458015	+	0.687355	0.0224189	0.0496948	F5H365	More abundant in miR-142-KO	137850000	142490000	142000000	133150000	121250000	89981000	98443000	110570000	98028000	93038000	86192100	85073000	82840000	92570000	84050000	57678000	37504000	79749000	72321000	34983000	PMID: 34456965	o			-
Cytochrome c	CYCS	+	0.268023	0.000980562	0.00232028	+	0.686782	5.26172e-06	0	C9JFR7	More abundant in miR-142-KO	1575600000	1467900000	1677900000	1548500000	1596000000	1335300000	1178600000	1349200000	1273900000	1400500000	1313400000	1355200000	1310700000	1447000000	1237800000	836200000	821180000	931309000	817520000	739560000	https://www.nature.com/articles/4401950	?	apoptosis	ox. Stress	-
Vigilin	HDLBP	+	0.468304	7.20765e-05	0.000421053	+	0.683604	0.000203275	0.00167033	A0A024R4E5	More abundant in miR-142-KO	189600000	210490000	207890000	176600000	192200000	134480000	149110000	135620000	153340000	133240000	214080000	228450000	216250000	223190000	233120000	166600000	146360000	138050000	107220000	142640000	PMID: 24676454	o			-
Uroporphyrinogen decarboxylase	UROD	+	1.26224	1.88532e-07	0	+	0.652345	0.0023511	0.0082383	P06132	More abundant in miR-142-KO	172790000	173070000	180780000	167990000	165790000	69948000	60534000	72372000	74597000	82949000	152520000	126900000	124590000	106850000	111030000	88143000	90920000	58015000	75095000	85430000	PMID: 21270338	o			-
Sorbitol dehydrogenase	HEL-S-95n	+	0.472421	1.37159e-06	0	+	0.629187	3.00907e-06	0	V9HW89	More abundant in miR-142-KO	431810000	459600000	450420000	456210000	456490000	305340000	332610000	347770000	312240000	328340000	362260000	318760000	321190000	331960000	315550000	230810000	209890000	209980000	221360000	194920000	PMID: 34885252	o			+
39S ribosomal protein L38, mitochondrial	MRPL38	+	0.570369	0.00145265	0.00312821		0.622673	0.0288786	0.0607413	Q96DV4	More abundant in miR-142-KO	77600000	75041000	76832000	81163000	90536000	47561000	44447000	57262000	54642000	68850000	50455000	54415000	55244000	46260000	44040000	30979000	49445000	43301000	NaN	NaN	PMID: 28445780	o			-
Cysteine and glycine-rich protein 1	CSRP1	+	0.552369	0.000354018	0.0013125	+	0.615301	0.000307877	0.00225243	B4DY28	More abundant in miR-142-KO	250240000	204430000	237980000	252160000	236360000	165900000	172280000	144830000	139930000	184690000	470460000	408520000	416860000	382850000	346570000	282820000	293210000	220060000	261730000	263840000	PMID: 32444848	s			-
Cytochrome c oxidase subunit 6B1	COX6B1	+	0.666811	0.000422912	0.00147368	+	0.596279	0.000402553	0.00246667	P14854	More abundant in miR-142-KO	255930000	228770000	259720000	248220000	206140000	134610000	123060000	159350000	177830000	164370000	223020000	175000000	234600000	234520000	213830000	133000000	137020000	142060000	132290000	169760000	PMID: 31280487	s			-
Ras-related protein Rab-18	RAB18	+	2.00138	0.000115554	0.000451128	+	0.5411	0.000323275	0.00214815	Q9NP72	More abundant in miR-142-KO	83736000	68860000	96225000	89023900	86717000	NaN	NaN	NaN	NaN	NaN	178960000	191030000	244460000	219780000	211980000	138090000	133340000	154640000	136910000	153120000	PMID: 32494165	o			+
Ubiquitin conjugation factor E4 A	UBE4A	+	0.62666	0.000199729	0.000670968	+	0.532488	0.000571133	0.00295652	Q14139	More abundant in miR-142-KO	77719000	88334000	75524000	85873000	84052000	44864000	51993000	60170000	61747000	49214000	44640000	52268000	45555000	51871000	50833000	29708000	33234000	30075000	37676000	39570000	PMID: 35136024	o			-
LIM domain and actin-binding protein 1	LIMA1	+	2.01283	0.0220956	0.0303563		0.527138	0.0310621	0.0637291	F8VQE1	More abundant in miR-142-KO	126670000	121030000	150180000	33807000	61301000	NaN	NaN	NaN	NaN	84956000	214650000	210870000	185530000	188160000	191710000	166620000	167120000	83067000	126390000	166730000	PMID: 25569716	s			-
Mannose-1-phosphate guanyltransferase beta	GMPPB	+	1.44457	0.00816487	0.0121712	+	0.516726	0.00432628	0.0144722	A0A024R2X1	More abundant in miR-142-KO	56232000	77486000	59449000	58500000	50631000	NaN	NaN	34196000	43408000	NaN	43204000	47304000	48670000	45282000	51381000	NaN	28839000	36318000	27451000	NaN	PMID: 32489319	o			-
Tubulin beta-4A chain	TUBB4A	+	1.79576	0.0124241	0.01778	+	0.511806	0.00117091	0.00482979	P04350	More abundant in miR-142-KO	89005000	74880000	NaN	63822000	90825000	NaN	NaN	NaN	NaN	NaN	53919000	53130000	53941000	56120000	47304000	32152000	43376000	31669000	42345000	37220000	PMID: 32899298	o			-
Nucleoplasmin-3	NPM3	+	1.00994	0.0202963	0.0285133		0.457438	0.0338495	0.0675517	O75607	More abundant in miR-142-KO	156650000	133860000	140870000	144280000	115560000	NaN	100890000	69028000	99640000	77370000	125540000	98370100	107770000	89710000	112400000	104140000	82178000	59779000	60193000	89283000	PMID: 32899298	o			-
Vesicle-associated membrane protein 2	VAMP2	+	1.85508	0.00907466	0.0137947	+	0.377563	0.0126819	0.0326161	J3QRU4	More abundant in miR-142-KO	94090000	71475000	96037100	94613000	89741900	NaN	NaN	46053000	68630000	NaN	61075000	51790000	69297000	66579000	72294000	61404000	47708000	NaN	47020000	45239000	PMID: 29328362	o			+
Short/branched chain specific acyl-CoA dehydrogenase, mitochondrial	ACADSB	+	1.61026	0.00319315	0.00556701		0.349611	0.0270935	0.0583565	A0A0S2Z3P9	More abundant in miR-142-KO	56048000	63554000	NaN	72638000	65799000	NaN	NaN	NaN	NaN	NaN	95198900	97614000	89462000	111090000	83471000	65234000	66909000	89673000	89767000	65319000		?	mitochond.		-
E3 ubiquitin-protein ligase UBR4	UBR4	+	-0.631702	0.000391586	0.00142574		-0.167759	0.0285043	0.0602505	Q5T4S7	Less abundant in miR-142_KO	206270000	252290000	184690000	195590000	269880000	355350000	343810000	338260000	334810000	327400000	226000000	256480000	218780000	240490000	248690000	277010000	245030000	269870000	293150000	252620000	PMID: 32087767	o	mitochond.
Vacuolar protein sorting-associated protein VTA1 homolog	VTA1	+	-1.03759	5.46562e-07	0	+	-0.180345	0.000593866	0.00297143	A0A087WY55	Less abundant in miR-142_KO	122390000	125140000	116420000	127180000	112830000	223490000	262510000	279390000	223100000	255050000	216640000	200340000	202010000	216700000	208390000	227350000	238770000	237350000	248900000	230660000	PMID: 19832994	s
F-actin-capping protein subunit alpha-1	CAPZA1	+	-0.844127	3.28478e-08	0		-0.186959	0.0496262	0.0888035	A0A024R0E5	Less abundant in miR-142_KO	711830000	662200000	746850000	707610000	707150000	1277800000	1320500000	1279500000	1170100000	1300100000	1005100000	956870000	955349000	963360000	981640000	1058500000	1020000000	1237900000	1283600000	968190000	PMID: 33777788	s
F-actin-capping protein subunit beta	CAPZB	+	-0.823338	5.45432e-07	0		-0.197797	0.0260361	0.056739	B2R7T8	Less abundant in miR-142_KO	840260000	783150000	847730000	881220000	861780000	1480500000	1457500000	1642300000	1335200000	1553200000	1451200000	1343300000	1301400000	1397100000	1344400000	1436900000	1708300000	1589100000	1753900000	1382400000	PMID: 33564074	S	UBR4 CAPZB
Cleavage stimulation factor subunit 3	CSTF3	+	-1.37033	0.00162236	0.0032963	+	-0.206466	0.02254	0.0497849	Q12996	Less abundant in miR-142_KO	NaN	46133000	NaN	NaN	NaN	53351000	56880000	49179000	81903000	67721000	42105000	45226000	53836000	49664000	50970000	56544000	53717000	59720000	56836000	51484000	PMID: 30243491	o
Regulator of chromosome condensation	RCC1	+	-0.784169	3.62739e-09	0	+	-0.206812	0.00738352	0.0217647	Q5T081	Less abundant in miR-142_KO	348480000	365800000	375270000	348270000	346770000	589680000	617460000	620830000	610270000	634300000	472790000	521200000	525330000	554810000	538380000	626810000	629220000	535740000	607070000	617290000	PMID: 33539787	o
Pyrroline-5-carboxylate reductase 2;Pyrroline-5-carboxylate reductase	PYCR2	+	-0.751202	0.0002406	0.000824242		-0.226666	0.037751	0.0745394	A0A0S2Z5U6	Less abundant in miR-142_KO	125200000	100480000	109580000	96603000	82780900	174650000	165100000	162400000	204040000	155880000	105500000	88926000	111820000	111650000	97794100	133640000	120130000	132400000	111290000	106220000	PMID: 34332325	o
Nuclear pore complex protein Nup98-Nup96;Nuclear pore complex protein Nup98;Nuclear pore complex protein Nup96	NUP98	+	-1.02567	2.54659e-05	0.000112676	+	-0.23055	0.0211713	0.0472883	P52948	Less abundant in miR-142_KO	89696000	125690000	117490000	138190000	129570000	272110000	219640000	241520000	241620000	237850000	143800000	162070000	157400000	171440000	126890000	187210000	175760000	167110000	177930000	181350000	PMID: 30935371	o
DNA fragmentation factor subunit alpha	DFFA	+	-0.770855	8.18309e-05	0.0004	+	-0.234235	0.0157787	0.0390797	Q53HN4	Less abundant in miR-142_KO	69334000	49829000	66196000	56263000	65285000	101170000	113290000	107760000	90343900	108880000	116480000	108800000	108860000	101240000	97346100	127590000	115910000	118570000	146730000	119000000	PMID: 31709175	o
F-actin-capping protein subunit alpha-2	CAPZA2	+	-0.685688	0.000690825	0.0016875		-0.234816	0.0365725	0.072898	Q53GE2	Less abundant in miR-142_KO	110730000	89772000	124330000	128560000	89239000	170840000	201890000	160840000	158410000	173710000	280950000	237530000	220390000	268180000	249850000	296650000	305280000	279760000	343190000	255750000	PMID: 29190909	o
Protein-L-isoaspartate O-methyltransferase;Protein-L-isoaspartate(D-aspartate) O-methyltransferase	PCMT1	+	-1.30486	1.09371e-07	0		-0.244175	0.0392143	0.0761314	A0A384MDK7	Less abundant in miR-142_KO	301690000	275650000	309700000	260000000	340370000	735840000	778170000	734330000	681850000	731750000	552120000	528290000	467920000	603430000	579830000	645510000	614580000	621640000	785570000	574540000	PMID: 29517839	o
Protein RCC2	RCC2	+	-0.899123	4.12686e-07	0	+	-0.274404	0.0140939	0.0356777	A0A024RAC5	Less abundant in miR-142_KO	857440000	864830000	887480000	861790000	861720000	1628100000	1537300000	1530700000	1519700000	1893600000	1022700000	983840000	1036300000	1062800000	942630000	1304200000	1375300000	984659000	1242300000	1232300000	PMID: 32801160	o
Moesin	HEL70	+	-0.633227	2.72809e-06	0	+	-0.282573	0.00614097	0.0192693	V9HWC0	Less abundant in miR-142_KO	2459900000	2590900000	2299000000	2481200000	2495100000	4051900000	3717900000	4099800000	3428000000	3845900000	3808700000	3872200000	3529800000	3739100000	3740600000	4210400000	4605700000	4269800000	5509900000	4249500000	PMID: 30675256	o
Ezrin;Tyrosine-protein kinase receptor	EZR	+	-1.51553	1.42396e-09	0	+	-0.315801	0.019179	0.0441368	Q6NUR7	Less abundant in miR-142_KO	1285100000	1228000000	1309400000	1193500000	1333200000	3587600000	3588900000	3720800000	3327200000	3940500000	1442400000	1566600000	1458900000	1489300000	1454000000	1715800000	1913200000	1808400000	2368300000	1517000000	PMID: 30804430	o
Heterochromatin protein 1-binding protein 3	HP1BP3	+	-0.857721	3.22652e-05	9.52381e-05	+	-0.350395	0.00728744	0.0218333	Q5SSJ5	Less abundant in miR-142_KO	285930000	275110000	285250000	311210000	327040000	535930000	469420000	654300000	468660000	578550000	538810000	559290000	624300000	597800000	553880000	706590000	681770000	767140000	905700000	626860000	PMID: 34249436	o
Dedicator of cytokinesis protein 2	DOCK2	+	-0.649115	0.00105535	0.00249825	+	-0.377623	0.00356264	0.0117621	A0A2X0SFD3	Less abundant in miR-142_KO	380160000	332810000	407630000	306170000	255610000	483750000	506660000	598980000	514770000	506550000	634900000	608280000	564740000	608340000	654580000	863700000	764750000	716260000	962950000	705650000	PMID: 20350533	o
ADP-ribosylation factor 6	ARF6		-1.64078	0.0404475	0.0527413	+	-0.384357	0.00448628	0.0147491	Q5U025	Less abundant in miR-142_KO	NaN	NaN	NaN	75737000	82117000	68919000	70533000	82213000	126960000	71895000	68572000	67059000	68166000	70665000	60848000	78952000	97988100	71815000	93927000	97857900	PMID: 31399545	o
Growth factor receptor-bound protein 2	GRB2	+	-0.633761	2.14862e-05	0	+	-0.398201	0.0043758	0.0145744	A0A384ME16	Less abundant in miR-142_KO	2178400000	2271200000	2186500000	2128100000	2330500000	3336800000	3382500000	3871500000	2959800000	3730600000	564430000	614810000	615210000	544310000	538640000	846500000	888220000	618420000	746930000	716410000	PMID: 33848463	o
Methionine aminopeptidase 2;Methionine aminopeptidase	METAP2	+	-0.633401	4.2357e-06	0	+	-0.490424	0.0159223	0.039086	A0A140VJE3	Less abundant in miR-142_KO	338980000	371020000	302280000	340250000	302720000	512750000	507680000	517830000	523970000	497960000	410140000	344410000	371980000	355860000	328070000	535920000	654440000	387050000	407900000	606240000	PMID: 33637565	o
Histone H1.5	HIST1H1B	+	-0.604968	3.5856e-05	9.09091e-05	+	-0.501611	0.000441083	0.00253659	P16401	Less abundant in miR-142_KO	11164000000	11407000000	11656000000	11849000000	12789000000	19973000000	16306000000	19760000000	16159000000	17605000000	7178500000	8504710000	9854810000	9669690000	8392300000	12609000000	13076000000	11731000000	11807000000	12162000000	PMID: 34746019	o
MOB kinase activator 3A	MOB3A	+	-1.70736	0.036738	0.0486139	+	-0.506697	0.00357471	0.0117185	Q96BX8	Less abundant in miR-142_KO	NaN	NaN	79091000	NaN	NaN	NaN	91201000	106790000	76686000	103170000	78579000	89114000	81520000	108160000	88067000	111860000	117130000	147630000	147650000	110230000	PMID: 35046109	o
Guanine nucleotide-binding protein G(s) subunit alpha isoforms short;Guanine nucleotide-binding protein G(s) subunit alpha isoforms XLas	GNAS	+	-0.638674	2.84006e-05	0.000103896	+	-0.513044	3.85035e-05	0.000140351	A0A0S2Z3S5	Less abundant in miR-142_KO	117910000	135920000	126240000	126700000	119260000	214980000	179220000	209040000	203700000	170450000	114100000	136360000	121750000	129010000	126310000	163920000	178350000	190020000	193810000	169680000	PMID: 34099908	o
EF-hand domain-containing protein D2	EFHD2	+	-0.902283	0.0319642	0.0416815	+	-0.53817	0.0157076	0.0389498	A0A024QZ77	Less abundant in miR-142_KO	132070000	161160000	44403000	128250000	131250000	253380000	185950000	235270000	186590000	175420000	166830000	219220000	148290000	207250000	178900000	251050000	246970000	229550000	233110000	391340000	PMID: 34616024	o
Rho-related GTP-binding protein RhoG	ARHG	+	-1.71651	0.0117632	0.0167047	+	-0.551767	0.00312967	0.0109147	Q6ICQ8	Less abundant in miR-142_KO	279170000	275460000	337860000	NaN	285430000	668730000	731170000	723690000	604300000	636010000	406710000	505030000	558960000	540410000	546810000	657420000	602680000	862390000	828300000	811359000	PMID: 11803464	o
Interferon regulatory factor 8	IRF8	+	-1.25603	9.4204e-05	0.000384	+	-0.572003	0.0216305	0.0481374	B2R8V7	Less abundant in miR-142_KO	NaN	NaN	NaN	NaN	NaN	NaN	33798000	50261000	36474000	43191000	NaN	26212000	38267000	33985000	30939000	37060000	45509000	37879000	44964000	48643000	PMID: 35211408	s
Transducin-like enhancer protein 3	TLE3		-1.35685	0.0383553	0.0503045	+	-0.602177	0.011721	0.0306801	Q6PRX3	Less abundant in miR-142_KO	NaN	NaN	74274000	62959000	NaN	83844100	64162000	79268000	63096000	68211000	51661000	62087000	47237000	NaN	50808000	64397000	61828000	87596000	80587000	70332000	PMID: 31855178	o
Ornithine aminotransferase, mitochondrial;Ornithine aminotransferase, hepatic form;Ornithine aminotransferase, renal form	OAT	+	-0.258588	0.00326644	0.00567775	+	-0.636809	3.63883e-05	0	A0A140VJQ4	Less abundant in miR-142_KO	300330000	315200000	343020000	326050000	305840000	368270000	350630000	426140000	400600000	359930000	219360000	263330000	226600000	214870000	250080000	346270000	388330000	393450000	323800000	373150000	PMID: 30198174	o
Catalase	CAT	+	-0.237291	0.0380172	0.0498657	+	-0.641248	1.63191e-05	0	A0A384P5Q0	Less abundant in miR-142_KO	390250000	347710000	370340000	377650000	379660000	448460000	375380000	551030000	421830000	419080000	177270000	178580000	144000000	174730000	150570000	250260000	271070000	245580000	258410000	257120000	PMID: 28384098	s/o?	PPA2
Pyridoxal kinase	HEL-S-1a	+	-0.210461	0.00175023	0.00343202	+	-0.692352	0.00274988	0.00937652	V9HWC3	Less abundant in miR-142_KO	91435000	92779000	93058900	92128000	87803100	111820000	98005000	113520000	99433000	107060000	49429000	75127000	55485000	55101000	58557000	88623000	86243000	104010000	124380000	74078000	PMID: 31935373	o
Proteasome subunit beta type;Proteasome subunit beta type-9	PSMB9	+	-1.2362	3.44183e-05	9.41176e-05	+	-0.698924	0.00729987	0.0217751	A2ACR1	Less abundant in miR-142_KO	68548000	92449000	57215000	87858000	87617100	192990000	158380000	189640000	169160000	206530000	33257000	29066000	31487000	30025000	38530000	60563000	49342000	49676000	75748000	35296000	PMID: 27798858	s	???
Inorganic pyrophosphatase 2, mitochondrial	PPA2		-1.18278	0.0441896	0.0577555	+	-0.714587	0.0186709	0.0432672	Q9H2U2	Less abundant in miR-142_KO	55753000	62717000	60396000	52859000	NaN	110680000	78913000	91753000	98628900	90855000	72464000	102950000	119760000	110320000	143820000	152940000	160290000	232380000	237200000	124840000	PMID: 23950968	? Catalase!
High mobility group protein B2	HMGB2	+	-0.565128	0.000268208	0.001	+	-0.722121	0.0048718	0.0155644	P26583	Less abundant in miR-142_KO	1331700000	1258400000	1140700000	1224100000	1289100000	1994800000	1702600000	1976300000	1530300000	2081900000	1282400000	1271000000	1269800000	1467400000	1089400000	2427700000	2747300000	1378900000	2335000000	1882000000	PMID: 30296520	o
Proteasome subunit beta type;Proteasome subunit beta type-8	PSMB8	+	-0.81528	4.27523e-06	0	+	-0.748356	0.0124868	0.0326055	Q6FHU0	Less abundant in miR-142_KO	237580000	221570000	208810000	213350000	212380000	379970000	385130000	410890000	326620000	427830000	112470000	112980000	116170000	125820000	63239000	170300000	161940000	188340000	239140000	126500000	PMID: 26894977	o
Vacuolar protein sorting-associated protein 4B	VPS4B	+	-0.855485	0.0283878	0.0378624	+	-0.753431	0.00100706	0.00422599	A8K5D8	Less abundant in miR-142_KO	74214000	79987000	NaN	NaN	99294000	121370000	96785000	104970000	92111100	131790000	84593100	101220000	66003000	86688900	81435000	142700000	178390000	138380000	141110000	109280000	PMID: 31930723	o
Dihydropyrimidinase-related protein 2	DPYSL2	+	-0.837674	0.000317631	0.0012973	+	-0.797463	0.00151522	0.00617822	Q59GB4	Less abundant in miR-142_KO	121110000	117110000	100270000	140750000	136100000	238370000	206530000	248980000	166410000	243500000	1604100000	1031900000	911810000	984840000	1387100000	1987400000	2043000000	1962500000	2327600000	1763100000	PMID: 33219287	s
Ubiquitin-conjugating enzyme E2 G1;Ubiquitin-conjugating enzyme E2 G1, N-terminally processed	UBE2G1	+	-0.377868	0.00630523	0.00989474	+	-0.857237	0.00897298	0.0246027	P62253	Less abundant in miR-142_KO	54756000	55397000	44233000	63565000	56074000	76250000	67015000	66591000	65208000	79848000	33962000	38603000	NaN	NaN	51776000	58174000	65975000	49639000	52437000	65782000	PMID: 30234487	s
L-xylulose reductase	DCXR	+	-0.18472	0.0199217	0.027923	+	-0.890274	0.000354604	0.00232143	J3KS22	Less abundant in miR-142_KO	358940000	339800000	357460000	322430000	360530000	406290000	377570000	453970000	372500000	370590000	149080000	179560000	169890000	173670000	159100000	307490000	280150000	356520000	398150000	224820000	PMID: 23988570	s
Gamma-enolase;Enolase	ENO2	+	-1.37271	1.06593e-05	0	+	-0.956789	0.00822914	0.0232861	Q6FHV6	Less abundant in miR-142_KO	292070000	311060000	351570000	311660000	298790000	758380000	791480000	1139900000	649240000	779690000	179220000	187580000	168880000	183830000	178020000	274880000	306910000	513170000	565320000	209140000	PMID: 29689546	o
Ubiquitin carboxyl-terminal hydrolase 47	USP47	+	-1.41498	0.0224111	0.030933	+	-1.02336	0.0109958	0.0289744	Q96K76	Less abundant in miR-142_KO	NaN	NaN	NaN	NaN	NaN	59610000	52013000	NaN	38807000	57348000	39020000	20167000	49434000	51739000	30713000	66391000	110660000	56099000	87869900	59225000	PMID: 33397955	o
Serine/threonine-protein kinase 26	STK26		-0.791672	0.0424112	0.05532	+	-1.13578	0.00454811	0.0146758	Q8NBY1	Less abundant in miR-142_KO	NaN	74612000	56654000	63783000	NaN	92093000	78025000	69990000	72628000	83958000	34925000	41462000	NaN	NaN	32628000	53648000	66818000	51188000	64015000	58523000	PMID: 29232556	o
Signal transducer and activator of transcription 5B;Signal transducer and activator of transcription	STAT5B	+	-0.965948	5.33102e-05	0.0002	+	-1.8694	0.00152159	0.00614778	P51692	Less abundant in miR-142_KO	105350000	96959100	101990000	105840000	116000000	165470000	210260000	254560000	176810000	232280000	93856000	27030000	53039000	79759000	42141000	155810000	123190000	258670000	295870000	200490000	PMID: 26716518	o

## Sheet: Abgleich miRTarBase
		Targets miR-142-5p (strong evidence)	Protein names	Gene names	Significant BJAB	Log 2 Fold Change BJAB_KO_BJAB_WT	Student's T-test p-value BJAB_KO_BJAB_WT	Student's T-test q-value BJAB_KO_BJAB_WT	Significant SUDHL4	Log 2 Fold Change SUDHL4_KO_SUDHL4_WT	Student's T-test p-value SUDHL4_KO_SUDHL4_WT	Student's T-test q-value SUDHL4_KO_SUDHL4_WT	Uniprot Accession	Abundance		onco/sup
	0	NFE2L2	Cofilin-2	CFL2	+	3.64732	7.94012e-07	0	+	5.24144	1.68085e-08	0	Q549N0	More abundant in miR-142-KO	https://pubmed.ncbi.nlm.nih.gov/29342841/	o
	0	TP53INP1	Twinfilin-1	TWF1	+	0.776328	0.000298997	0.00121547	+	3.40523	1.93234e-06	0	Q12792	More abundant in miR-142-KO	https://elifesciences.org/articles/01964.pdf	o
	0	TGFBR2	Hydroxymethylglutaryl-CoA synthase, cytoplasmic	HMGCS1	+	0.449004	0.000405987	0.0015098	+	2.18862	0.000566942	0.0029781	Q8N995	More abundant in miR-142-KO	https://pubmed.ncbi.nlm.nih.gov/32349352/	o
	0	SMAD3	Serine/threonine-protein kinase N2	PKN2	+	2.08168	0.000206918	0.000658228	+	1.78856	0.00068849	0.00354362	Q16513	More abundant in miR-142-KO	https://pubmed.ncbi.nlm.nih.gov/29368606/	s
	0	SMAD3	4-aminobutyrate aminotransferase, mitochondrial	ABAT	+	1.79157	0.000975685	0.0023	+	1.7834	0.001733	0.00662857	X5D8S1	More abundant in miR-142-KO	https://pubmed.ncbi.nlm.nih.gov/32093682/	s
	0	RAC1	COP9 signalosome complex subunit 7a	COPS7A	+	0.352034	0.026133	0.0352022	+	1.5223	0.00706683	0.0215783	Q9UBW8	More abundant in miR-142-KO	https://www.nature.com/articles/s41388-019-0934-z	o
	0	ZEB1	Double-stranded RNA-binding protein Staufen homolog 1	STAU1	+	0.521432	0.000246036	0.000886228	+	1.51245	0.0163035	0.0398206	A8K622	More abundant in miR-142-KO	https://pubmed.ncbi.nlm.nih.gov/28004750/	s
	0	SIRT1	Long-chain-fatty-acid--CoA ligase 1	ACSL1	+	0.304949	0.00301332	0.00531593	+	1.50148	1.2696e-05	0	A8K9T3	More abundant in miR-142-KO	https://doi.org/10.3390/ijms20153624	o
	0	HIF1A	Endophilin-A2	SH3GL1	+	1.04553	2.06135e-06	0	+	1.43972	7.28601e-07	0	Q9UQD4	More abundant in miR-142-KO	https://pubmed.ncbi.nlm.nih.gov/27220321/	o
	0	SOCS1	Heat shock factor-binding protein 1	HSBP1		1.24707	0.0388759	0.0507215	+	1.34647	0.0158946	0.0391383	O75506	More abundant in miR-142-KO	https://pubmed.ncbi.nlm.nih.gov/22804237/	o
	0	CLDN1	Cytochrome c oxidase subunit NDUFA4	NDUFA4	+	1.2147	0.00206755	0.00364368		1.34155	0.0376057	0.0744698	A0A024R9Z0	More abundant in miR-142-KO	https://pubmed.ncbi.nlm.nih.gov/33314701/	o
	0	PTEN	Acetyl-CoA carboxylase 1;Biotin carboxylase	ACACA	+	1.1022	0.0374565	0.0491877	+	1.2893	0.0155873	0.0385721	Q13085	More abundant in miR-142-KO	https://pubmed.ncbi.nlm.nih.gov/29056512/	o
	0	Becn1	Tubulin-specific chaperone C	TBCC	+	1.39381	1.3353e-05	0	+	1.28374	3.72789e-05	0	Q15814	More abundant in miR-142-KO	https://pubmed.ncbi.nlm.nih.gov/31278033/	s
	0	BACH2	Isocitrate dehydrogenase [NADP];Isocitrate dehydrogenase [NADP] cytoplasmic	HEL-S-26	+	0.349434	0.0066924	0.0102893	+	1.27719	4.01404e-07	0	V9HWJ2	More abundant in miR-142-KO	https://pubmed.ncbi.nlm.nih.gov/31221981/	o
	0	TGFB2	Chloride intracellular channel protein;Chloride intracellular channel protein 4	CLIC4	+	0.736019	1.16299e-05	0	+	1.25306	2.48577e-06	0	Q6FIC5	More abundant in miR-142-KO	https://pubmed.ncbi.nlm.nih.gov/22387366/	s
			Endoplasmic reticulum resident protein 44	ERP44	+	0.172078	0.0180973	0.025465	+	1.22677	4.39199e-08	0	A0A384MEE7	More abundant in miR-142-KO	https://pubmed.ncbi.nlm.nih.gov/34493236/	o
			ADP-ribosylation factor-like protein 3	ARL3	+	0.241739	0.00249601	0.0042865	+	1.2202	7.05998e-06	0	P36405	More abundant in miR-142-KO	https://pubmed.ncbi.nlm.nih.gov/31234870/	s
			Oxysterol-binding protein-related protein 3	OSBPL3	+	1.02967	0.000990752	0.00231206	+	1.14161	1.95195e-06	0	Q9H4L5	More abundant in miR-142-KO	https://pubmed.ncbi.nlm.nih.gov/32709922/	o
			Glia maturation factor beta	GMFB	+	0.409428	0.0120458	0.0171009	+	0.998693	2.53589e-05	0	P60983	More abundant in miR-142-KO	https://pubmed.ncbi.nlm.nih.gov/27655328/	s
			Transferin receptor	TFRC	+	1.82201	0.00130146	0.00287043	+	0.968452	0.00123076	0.00495833	A8K6Q8	More abundant in miR-142-KO	https://pubmed.ncbi.nlm.nih.gov/32064157/	o
			YTH domain-containing family protein 3	YTHDF3	+	1.16004	0.00732766	0.0111952	+	0.953996	0.00629179	0.0197531	Q8NA80	More abundant in miR-142-KO	https://pubmed.ncbi.nlm.nih.gov/32905518/	o
			Ribosome maturation protein SBDS	SBDS	+	0.533023	2.76011e-05	0.000105263	+	0.94814	1.37278e-07	0	A0A0S2Z5I7	More abundant in miR-142-KO	https://pubmed.ncbi.nlm.nih.gov/31879230/	s
			Heat shock 70 kDa protein 1B;Heat shock 70 kDa protein 1A	HSPA1A	+	0.708685	1.18382e-07	0	+	0.877383	3.61093e-07	0	A8K5I0	More abundant in miR-142-KO	https://pubmed.ncbi.nlm.nih.gov/32374522/	o
			28S ribosomal protein S25, mitochondrial	MRPS25	+	0.563088	0.0129206	0.0183144		0.876672	0.0392537	0.0761246	P82663	More abundant in miR-142-KO
			28S ribosomal protein S5, mitochondrial	MRPS5	+	0.291385	0.00978374	0.0147865		0.81738	0.0375812	0.0745479	P82675	More abundant in miR-142-KO
			39S ribosomal protein L39, mitochondrial	MRPL39	+	0.166514	0.0331479	0.0430503		0.781911	0.0244294	0.0544609	Q9NYK5	More abundant in miR-142-KO
			NAD kinase 2, mitochondrial	NADK2	+	0.792666	9.69724e-05	0.000377953	+	0.777996	0.00209135	0.00773451	Q4G0N4	More abundant in miR-142-KO
			39S ribosomal protein L44, mitochondrial	MRPL44	+	0.691904	0.00707264	0.0107368	+	0.764471	0.00884511	0.0243526	A0A024R473	More abundant in miR-142-KO
			Asparagine synthetase [glutamine-hydrolyzing]	ASNS	+	0.305325	0.00321831	0.00553846	+	0.762858	0.000414652	0.00252459	P08243	More abundant in miR-142-KO
			ADP-ribosylation factor 4	ARF4	+	0.692647	3.19477e-08	0	+	0.761308	6.77352e-06	0	P18085	More abundant in miR-142-KO
			Nuclear fragile X mental retardation-interacting protein 2	NUFIP2	+	0.496183	0.0123572	0.0177114		0.735851	0.0337414	0.0673921	Q7Z417	More abundant in miR-142-KO
			Syntaxin-12	STX12	+	0.447066	0.000499874	0.00167568	+	0.721159	2.02561e-07	0	Q86Y82	More abundant in miR-142-KO
			Importin-9	IPO9	+	1.19478	0.000360654	0.00129231	+	0.716208	0.000379676	0.00237931	Q96P70	More abundant in miR-142-KO
			Ras-specific guanine nucleotide-releasing factor RalGPS2	RALGPS2	+	1.87353	3.10661e-06	0	+	0.706329	0.00768597	0.0222363	Q86X27	More abundant in miR-142-KO
			Fructose-2,6-bisphosphatase TIGAR	TIGAR	+	1.53452	0.00422533	0.00698113	+	0.695675	3.79794e-06	0	Q9NQ88	More abundant in miR-142-KO
			Gamma-soluble NSF attachment protein	NAPG		0.250978	0.0494138	0.0638106	+	0.695169	0.000881929	0.00407273	Q6FHY4	More abundant in miR-142-KO
			Protein transport protein Sec23A	SEC23A	+	0.466743	0.000107709	0.000458015	+	0.687355	0.0224189	0.0496948	F5H365	More abundant in miR-142-KO
			Cytochrome c	CYCS	+	0.268023	0.000980562	0.00232028	+	0.686782	5.26172e-06	0	C9JFR7	More abundant in miR-142-KO
			Vigilin	HDLBP	+	0.468304	7.20765e-05	0.000421053	+	0.683604	0.000203275	0.00167033	A0A024R4E5	More abundant in miR-142-KO
			Uroporphyrinogen decarboxylase	UROD	+	1.26224	1.88532e-07	0	+	0.652345	0.0023511	0.0082383	P06132	More abundant in miR-142-KO
			Sorbitol dehydrogenase	HEL-S-95n	+	0.472421	1.37159e-06	0	+	0.629187	3.00907e-06	0	V9HW89	More abundant in miR-142-KO
			39S ribosomal protein L38, mitochondrial	MRPL38	+	0.570369	0.00145265	0.00312821		0.622673	0.0288786	0.0607413	Q96DV4	More abundant in miR-142-KO
			Cysteine and glycine-rich protein 1	CSRP1	+	0.552369	0.000354018	0.0013125	+	0.615301	0.000307877	0.00225243	B4DY28	More abundant in miR-142-KO
			Cytochrome c oxidase subunit 6B1	COX6B1	+	0.666811	0.000422912	0.00147368	+	0.596279	0.000402553	0.00246667	P14854	More abundant in miR-142-KO
			Ras-related protein Rab-18	RAB18	+	2.00138	0.000115554	0.000451128	+	0.5411	0.000323275	0.00214815	Q9NP72	More abundant in miR-142-KO
			Ubiquitin conjugation factor E4 A	UBE4A	+	0.62666	0.000199729	0.000670968	+	0.532488	0.000571133	0.00295652	Q14139	More abundant in miR-142-KO
			LIM domain and actin-binding protein 1	LIMA1	+	2.01283	0.0220956	0.0303563		0.527138	0.0310621	0.0637291	F8VQE1	More abundant in miR-142-KO
			Mannose-1-phosphate guanyltransferase beta	GMPPB	+	1.44457	0.00816487	0.0121712	+	0.516726	0.00432628	0.0144722	A0A024R2X1	More abundant in miR-142-KO
			Tubulin beta-4A chain	TUBB4A	+	1.79576	0.0124241	0.01778	+	0.511806	0.00117091	0.00482979	P04350	More abundant in miR-142-KO
			Nucleoplasmin-3	NPM3	+	1.00994	0.0202963	0.0285133		0.457438	0.0338495	0.0675517	O75607	More abundant in miR-142-KO
			Vesicle-associated membrane protein 2	VAMP2	+	1.85508	0.00907466	0.0137947	+	0.377563	0.0126819	0.0326161	J3QRU4	More abundant in miR-142-KO
			Short/branched chain specific acyl-CoA dehydrogenase, mitochondrial	ACADSB	+	1.61026	0.00319315	0.00556701		0.349611	0.0270935	0.0583565	A0A0S2Z3P9	More abundant in miR-142-KO
			E3 ubiquitin-protein ligase UBR4	UBR4	+	-0.631702	0.000391586	0.00142574		-0.167759	0.0285043	0.0602505	Q5T4S7	Less abundant in miR-142_KO
			Vacuolar protein sorting-associated protein VTA1 homolog	VTA1	+	-1.03759	5.46562e-07	0	+	-0.180345	0.000593866	0.00297143	A0A087WY55	Less abundant in miR-142_KO
			F-actin-capping protein subunit alpha-1	CAPZA1	+	-0.844127	3.28478e-08	0		-0.186959	0.0496262	0.0888035	A0A024R0E5	Less abundant in miR-142_KO
			F-actin-capping protein subunit beta	CAPZB	+	-0.823338	5.45432e-07	0		-0.197797	0.0260361	0.056739	B2R7T8	Less abundant in miR-142_KO
			Cleavage stimulation factor subunit 3	CSTF3	+	-1.37033	0.00162236	0.0032963	+	-0.206466	0.02254	0.0497849	Q12996	Less abundant in miR-142_KO
			Regulator of chromosome condensation	RCC1	+	-0.784169	3.62739e-09	0	+	-0.206812	0.00738352	0.0217647	Q5T081	Less abundant in miR-142_KO
			Pyrroline-5-carboxylate reductase 2;Pyrroline-5-carboxylate reductase	PYCR2	+	-0.751202	0.0002406	0.000824242		-0.226666	0.037751	0.0745394	A0A0S2Z5U6	Less abundant in miR-142_KO
			Nuclear pore complex protein Nup98-Nup96;Nuclear pore complex protein Nup98;Nuclear pore complex protein Nup96	NUP98	+	-1.02567	2.54659e-05	0.000112676	+	-0.23055	0.0211713	0.0472883	P52948	Less abundant in miR-142_KO
			DNA fragmentation factor subunit alpha	DFFA	+	-0.770855	8.18309e-05	0.0004	+	-0.234235	0.0157787	0.0390797	Q53HN4	Less abundant in miR-142_KO
			F-actin-capping protein subunit alpha-2	CAPZA2	+	-0.685688	0.000690825	0.0016875		-0.234816	0.0365725	0.072898	Q53GE2	Less abundant in miR-142_KO
			Protein-L-isoaspartate O-methyltransferase;Protein-L-isoaspartate(D-aspartate) O-methyltransferase	PCMT1	+	-1.30486	1.09371e-07	0		-0.244175	0.0392143	0.0761314	A0A384MDK7	Less abundant in miR-142_KO
			Protein RCC2	RCC2	+	-0.899123	4.12686e-07	0	+	-0.274404	0.0140939	0.0356777	A0A024RAC5	Less abundant in miR-142_KO
			Moesin	HEL70	+	-0.633227	2.72809e-06	0	+	-0.282573	0.00614097	0.0192693	V9HWC0	Less abundant in miR-142_KO
			Ezrin;Tyrosine-protein kinase receptor	EZR	+	-1.51553	1.42396e-09	0	+	-0.315801	0.019179	0.0441368	Q6NUR7	Less abundant in miR-142_KO
			Heterochromatin protein 1-binding protein 3	HP1BP3	+	-0.857721	3.22652e-05	9.52381e-05	+	-0.350395	0.00728744	0.0218333	Q5SSJ5	Less abundant in miR-142_KO
			Dedicator of cytokinesis protein 2	DOCK2	+	-0.649115	0.00105535	0.00249825	+	-0.377623	0.00356264	0.0117621	A0A2X0SFD3	Less abundant in miR-142_KO
			ADP-ribosylation factor 6	ARF6		-1.64078	0.0404475	0.0527413	+	-0.384357	0.00448628	0.0147491	Q5U025	Less abundant in miR-142_KO
			Growth factor receptor-bound protein 2	GRB2	+	-0.633761	2.14862e-05	0	+	-0.398201	0.0043758	0.0145744	A0A384ME16	Less abundant in miR-142_KO
			Methionine aminopeptidase 2;Methionine aminopeptidase	METAP2	+	-0.633401	4.2357e-06	0	+	-0.490424	0.0159223	0.039086	A0A140VJE3	Less abundant in miR-142_KO
			Histone H1.5	HIST1H1B	+	-0.604968	3.5856e-05	9.09091e-05	+	-0.501611	0.000441083	0.00253659	P16401	Less abundant in miR-142_KO
			MOB kinase activator 3A	MOB3A	+	-1.70736	0.036738	0.0486139	+	-0.506697	0.00357471	0.0117185	Q96BX8	Less abundant in miR-142_KO
			Guanine nucleotide-binding protein G(s) subunit alpha isoforms short;Guanine nucleotide-binding protein G(s) subunit alpha isoforms XLas	GNAS	+	-0.638674	2.84006e-05	0.000103896	+	-0.513044	3.85035e-05	0.000140351	A0A0S2Z3S5	Less abundant in miR-142_KO
			EF-hand domain-containing protein D2	EFHD2	+	-0.902283	0.0319642	0.0416815	+	-0.53817	0.0157076	0.0389498	A0A024QZ77	Less abundant in miR-142_KO
			Rho-related GTP-binding protein RhoG	ARHG	+	-1.71651	0.0117632	0.0167047	+	-0.551767	0.00312967	0.0109147	Q6ICQ8	Less abundant in miR-142_KO
			Interferon regulatory factor 8	IRF8	+	-1.25603	9.4204e-05	0.000384	+	-0.572003	0.0216305	0.0481374	B2R8V7	Less abundant in miR-142_KO
			Transducin-like enhancer protein 3	TLE3		-1.35685	0.0383553	0.0503045	+	-0.602177	0.011721	0.0306801	Q6PRX3	Less abundant in miR-142_KO
			Ornithine aminotransferase, mitochondrial;Ornithine aminotransferase, hepatic form;Ornithine aminotransferase, renal form	OAT	+	-0.258588	0.00326644	0.00567775	+	-0.636809	3.63883e-05	0	A0A140VJQ4	Less abundant in miR-142_KO
			Catalase	CAT	+	-0.237291	0.0380172	0.0498657	+	-0.641248	1.63191e-05	0	A0A384P5Q0	Less abundant in miR-142_KO
			Pyridoxal kinase	HEL-S-1a	+	-0.210461	0.00175023	0.00343202	+	-0.692352	0.00274988	0.00937652	V9HWC3	Less abundant in miR-142_KO
			Proteasome subunit beta type;Proteasome subunit beta type-9	PSMB9	+	-1.2362	3.44183e-05	9.41176e-05	+	-0.698924	0.00729987	0.0217751	A2ACR1	Less abundant in miR-142_KO
			Inorganic pyrophosphatase 2, mitochondrial	PPA2		-1.18278	0.0441896	0.0577555	+	-0.714587	0.0186709	0.0432672	Q9H2U2	Less abundant in miR-142_KO
			High mobility group protein B2	HMGB2	+	-0.565128	0.000268208	0.001	+	-0.722121	0.0048718	0.0155644	P26583	Less abundant in miR-142_KO
			Proteasome subunit beta type;Proteasome subunit beta type-8	PSMB8	+	-0.81528	4.27523e-06	0	+	-0.748356	0.0124868	0.0326055	Q6FHU0	Less abundant in miR-142_KO
			Vacuolar protein sorting-associated protein 4B	VPS4B	+	-0.855485	0.0283878	0.0378624	+	-0.753431	0.00100706	0.00422599	A8K5D8	Less abundant in miR-142_KO
			Dihydropyrimidinase-related protein 2	DPYSL2	+	-0.837674	0.000317631	0.0012973	+	-0.797463	0.00151522	0.00617822	Q59GB4	Less abundant in miR-142_KO
			Ubiquitin-conjugating enzyme E2 G1;Ubiquitin-conjugating enzyme E2 G1, N-terminally processed	UBE2G1	+	-0.377868	0.00630523	0.00989474	+	-0.857237	0.00897298	0.0246027	P62253	Less abundant in miR-142_KO
			L-xylulose reductase	DCXR	+	-0.18472	0.0199217	0.027923	+	-0.890274	0.000354604	0.00232143	J3KS22	Less abundant in miR-142_KO
			Gamma-enolase;Enolase	ENO2	+	-1.37271	1.06593e-05	0	+	-0.956789	0.00822914	0.0232861	Q6FHV6	Less abundant in miR-142_KO
			Ubiquitin carboxyl-terminal hydrolase 47	USP47	+	-1.41498	0.0224111	0.030933	+	-1.02336	0.0109958	0.0289744	Q96K76	Less abundant in miR-142_KO
			Serine/threonine-protein kinase 26	STK26		-0.791672	0.0424112	0.05532	+	-1.13578	0.00454811	0.0146758	Q8NBY1	Less abundant in miR-142_KO
			Signal transducer and activator of transcription 5B;Signal transducer and activator of transcription	STAT5B	+	-0.965948	5.33102e-05	0.0002	+	-1.8694	0.00152159	0.00614778	P51692	Less abundant in miR-142_KO

## Sheet: Abglpredtar 142-5p miRWALK2.0
		miR-142-5p target prediction nur NM	Protein names	Gene names	Significant BJAB	Log 2 Fold Change BJAB_KO_BJAB_WT	Student's T-test p-value BJAB_KO_BJAB_WT	Student's T-test q-value BJAB_KO_BJAB_WT	Significant SUDHL4	Log 2 Fold Change SUDHL4_KO_SUDHL4_WT	Student's T-test p-value SUDHL4_KO_SUDHL4_WT	Student's T-test q-value SUDHL4_KO_SUDHL4_WT	Uniprot Accession	Abundance		onco/sup
	1	UROD	Cofilin-2	CFL2	+	3.64732	7.94012e-07	0	+	5.24144	1.68085e-08	0	Q549N0	More abundant in miR-142-KO	https://pubmed.ncbi.nlm.nih.gov/29342841/	o
	1	ABAT	Twinfilin-1	TWF1	+	0.776328	0.000298997	0.00121547	+	3.40523	1.93234e-06	0	Q12792	More abundant in miR-142-KO	https://elifesciences.org/articles/01964.pdf	o
	1	STAU1	Hydroxymethylglutaryl-CoA synthase, cytoplasmic	HMGCS1	+	0.449004	0.000405987	0.0015098	+	2.18862	0.000566942	0.0029781	Q8N995	More abundant in miR-142-KO	https://pubmed.ncbi.nlm.nih.gov/32349352/	o
	1	NADK2	Serine/threonine-protein kinase N2	PKN2	+	2.08168	0.000206918	0.000658228	+	1.78856	0.00068849	0.00354362	Q16513	More abundant in miR-142-KO	https://pubmed.ncbi.nlm.nih.gov/29368606/	s
	1	HMGCS1	4-aminobutyrate aminotransferase, mitochondrial	ABAT	+	1.79157	0.000975685	0.0023	+	1.7834	0.001733	0.00662857	X5D8S1	More abundant in miR-142-KO	https://pubmed.ncbi.nlm.nih.gov/32093682/	s
	1	LIMA1	COP9 signalosome complex subunit 7a	COPS7A	+	0.352034	0.026133	0.0352022	+	1.5223	0.00706683	0.0215783	Q9UBW8	More abundant in miR-142-KO	https://www.nature.com/articles/s41388-019-0934-z	o
	1	TFRC	Double-stranded RNA-binding protein Staufen homolog 1	STAU1	+	0.521432	0.000246036	0.000886228	+	1.51245	0.0163035	0.0398206	A8K622	More abundant in miR-142-KO	https://pubmed.ncbi.nlm.nih.gov/28004750/	s
	1	COPS7A	Long-chain-fatty-acid--CoA ligase 1	ACSL1	+	0.304949	0.00301332	0.00531593	+	1.50148	1.2696e-05	0	A8K9T3	More abundant in miR-142-KO	https://doi.org/10.3390/ijms20153624	o
	1	ASNS	Endophilin-A2	SH3GL1	+	1.04553	2.06135e-06	0	+	1.43972	7.28601e-07	0	Q9UQD4	More abundant in miR-142-KO	https://pubmed.ncbi.nlm.nih.gov/27220321/	o
	1	CSRP1	Heat shock factor-binding protein 1	HSBP1		1.24707	0.0388759	0.0507215	+	1.34647	0.0158946	0.0391383	O75506	More abundant in miR-142-KO	https://pubmed.ncbi.nlm.nih.gov/22804237/	o
	1	SH3GL1	Cytochrome c oxidase subunit NDUFA4	NDUFA4	+	1.2147	0.00206755	0.00364368		1.34155	0.0376057	0.0744698	A0A024R9Z0	More abundant in miR-142-KO	https://pubmed.ncbi.nlm.nih.gov/33314701/	o
	1	UBE4A	Acetyl-CoA carboxylase 1;Biotin carboxylase	ACACA	+	1.1022	0.0374565	0.0491877	+	1.2893	0.0155873	0.0385721	Q13085	More abundant in miR-142-KO	https://pubmed.ncbi.nlm.nih.gov/29056512/	o
	1	TWF1	Tubulin-specific chaperone C	TBCC	+	1.39381	1.3353e-05	0	+	1.28374	3.72789e-05	0	Q15814	More abundant in miR-142-KO	https://pubmed.ncbi.nlm.nih.gov/31278033/	s
	1	CFL2	Isocitrate dehydrogenase [NADP];Isocitrate dehydrogenase [NADP] cytoplasmic	HEL-S-26	+	0.349434	0.0066924	0.0102893	+	1.27719	4.01404e-07	0	V9HWJ2	More abundant in miR-142-KO	https://pubmed.ncbi.nlm.nih.gov/31221981/	o
	1	HDLBP	Chloride intracellular channel protein;Chloride intracellular channel protein 4	CLIC4	+	0.736019	1.16299e-05	0	+	1.25306	2.48577e-06	0	Q6FIC5	More abundant in miR-142-KO	https://pubmed.ncbi.nlm.nih.gov/22387366/	s
	1	RAB18	Endoplasmic reticulum resident protein 44	ERP44	+	0.172078	0.0180973	0.025465	+	1.22677	4.39199e-08	0	A0A384MEE7	More abundant in miR-142-KO	https://pubmed.ncbi.nlm.nih.gov/34493236/	o
	1	YTHDF3	ADP-ribosylation factor-like protein 3	ARL3	+	0.241739	0.00249601	0.0042865	+	1.2202	7.05998e-06	0	P36405	More abundant in miR-142-KO	https://pubmed.ncbi.nlm.nih.gov/31234870/	s
	1	HSBP1	Oxysterol-binding protein-related protein 3	OSBPL3	+	1.02967	0.000990752	0.00231206	+	1.14161	1.95195e-06	0	Q9H4L5	More abundant in miR-142-KO	https://pubmed.ncbi.nlm.nih.gov/32709922/	o
	1	ACADSB	Glia maturation factor beta	GMFB	+	0.409428	0.0120458	0.0171009	+	0.998693	2.53589e-05	0	P60983	More abundant in miR-142-KO	https://pubmed.ncbi.nlm.nih.gov/27655328/	s
	1	ARF4	Transferin receptor	TFRC	+	1.82201	0.00130146	0.00287043	+	0.968452	0.00123076	0.00495833	A8K6Q8	More abundant in miR-142-KO	https://pubmed.ncbi.nlm.nih.gov/32064157/	o
	1	ACSL1	YTH domain-containing family protein 3	YTHDF3	+	1.16004	0.00732766	0.0111952	+	0.953996	0.00629179	0.0197531	Q8NA80	More abundant in miR-142-KO	https://pubmed.ncbi.nlm.nih.gov/32905518/	o
	1	NDUFA4	Ribosome maturation protein SBDS	SBDS	+	0.533023	2.76011e-05	0.000105263	+	0.94814	1.37278e-07	0	A0A0S2Z5I7	More abundant in miR-142-KO	https://pubmed.ncbi.nlm.nih.gov/31879230/	s
	1	TBCC	Heat shock 70 kDa protein 1B;Heat shock 70 kDa protein 1A	HSPA1A	+	0.708685	1.18382e-07	0	+	0.877383	3.61093e-07	0	A8K5I0	More abundant in miR-142-KO	https://pubmed.ncbi.nlm.nih.gov/32374522/	o
	1	NAPG	28S ribosomal protein S25, mitochondrial	MRPS25	+	0.563088	0.0129206	0.0183144		0.876672	0.0392537	0.0761246	P82663	More abundant in miR-142-KO
	1	GMFB	28S ribosomal protein S5, mitochondrial	MRPS5	+	0.291385	0.00978374	0.0147865		0.81738	0.0375812	0.0745479	P82675	More abundant in miR-142-KO
	1	ARL3	39S ribosomal protein L39, mitochondrial	MRPL39	+	0.166514	0.0331479	0.0430503		0.781911	0.0244294	0.0544609	Q9NYK5	More abundant in miR-142-KO
	1	HSPA1A	NAD kinase 2, mitochondrial	NADK2	+	0.792666	9.69724e-05	0.000377953	+	0.777996	0.00209135	0.00773451	Q4G0N4	More abundant in miR-142-KO
	1	PKN2	39S ribosomal protein L44, mitochondrial	MRPL44	+	0.691904	0.00707264	0.0107368	+	0.764471	0.00884511	0.0243526	A0A024R473	More abundant in miR-142-KO
	1	SEC23A	Asparagine synthetase [glutamine-hydrolyzing]	ASNS	+	0.305325	0.00321831	0.00553846	+	0.762858	0.000414652	0.00252459	P08243	More abundant in miR-142-KO
	1	CLIC4	ADP-ribosylation factor 4	ARF4	+	0.692647	3.19477e-08	0	+	0.761308	6.77352e-06	0	P18085	More abundant in miR-142-KO
	1	VAMP2	Nuclear fragile X mental retardation-interacting protein 2	NUFIP2	+	0.496183	0.0123572	0.0177114		0.735851	0.0337414	0.0673921	Q7Z417	More abundant in miR-142-KO
	1	ERP44	Syntaxin-12	STX12	+	0.447066	0.000499874	0.00167568	+	0.721159	2.02561e-07	0	Q86Y82	More abundant in miR-142-KO
	1	OSBPL3	Importin-9	IPO9	+	1.19478	0.000360654	0.00129231	+	0.716208	0.000379676	0.00237931	Q96P70	More abundant in miR-142-KO
	1	SBDS	Ras-specific guanine nucleotide-releasing factor RalGPS2	RALGPS2	+	1.87353	3.10661e-06	0	+	0.706329	0.00768597	0.0222363	Q86X27	More abundant in miR-142-KO
	1	IPO9	Fructose-2,6-bisphosphatase TIGAR	TIGAR	+	1.53452	0.00422533	0.00698113	+	0.695675	3.79794e-06	0	Q9NQ88	More abundant in miR-142-KO
	1	CYCS	Gamma-soluble NSF attachment protein	NAPG		0.250978	0.0494138	0.0638106	+	0.695169	0.000881929	0.00407273	Q6FHY4	More abundant in miR-142-KO
	1	NUFIP2	Protein transport protein Sec23A	SEC23A	+	0.466743	0.000107709	0.000458015	+	0.687355	0.0224189	0.0496948	F5H365	More abundant in miR-142-KO
	1	MRPS25	Cytochrome c	CYCS	+	0.268023	0.000980562	0.00232028	+	0.686782	5.26172e-06	0	C9JFR7	More abundant in miR-142-KO
	1	MRPL44	Vigilin	HDLBP	+	0.468304	7.20765e-05	0.000421053	+	0.683604	0.000203275	0.00167033	A0A024R4E5	More abundant in miR-142-KO
	1	MRPS5	Uroporphyrinogen decarboxylase	UROD	+	1.26224	1.88532e-07	0	+	0.652345	0.0023511	0.0082383	P06132	More abundant in miR-142-KO
	1	RALGPS2	Sorbitol dehydrogenase	HEL-S-95n	+	0.472421	1.37159e-06	0	+	0.629187	3.00907e-06	0	V9HW89	More abundant in miR-142-KO
	1	STX12	39S ribosomal protein L38, mitochondrial	MRPL38	+	0.570369	0.00145265	0.00312821		0.622673	0.0288786	0.0607413	Q96DV4	More abundant in miR-142-KO
	1	ACACA	Cysteine and glycine-rich protein 1	CSRP1	+	0.552369	0.000354018	0.0013125	+	0.615301	0.000307877	0.00225243	B4DY28	More abundant in miR-142-KO
	0	A2M	Cytochrome c oxidase subunit 6B1	COX6B1	+	0.666811	0.000422912	0.00147368	+	0.596279	0.000402553	0.00246667	P14854	More abundant in miR-142-KO
	0	ACADM	Ras-related protein Rab-18	RAB18	+	2.00138	0.000115554	0.000451128	+	0.5411	0.000323275	0.00214815	Q9NP72	More abundant in miR-142-KO
	0	ACADS	Ubiquitin conjugation factor E4 A	UBE4A	+	0.62666	0.000199729	0.000670968	+	0.532488	0.000571133	0.00295652	Q14139	More abundant in miR-142-KO
	0	ACAT1	LIM domain and actin-binding protein 1	LIMA1	+	2.01283	0.0220956	0.0303563		0.527138	0.0310621	0.0637291	F8VQE1	More abundant in miR-142-KO
	0	ACVRL1	Mannose-1-phosphate guanyltransferase beta	GMPPB	+	1.44457	0.00816487	0.0121712	+	0.516726	0.00432628	0.0144722	A0A024R2X1	More abundant in miR-142-KO
	0	PSEN1	Tubulin beta-4A chain	TUBB4A	+	1.79576	0.0124241	0.01778	+	0.511806	0.00117091	0.00482979	P04350	More abundant in miR-142-KO
	0	ADRB2	Nucleoplasmin-3	NPM3	+	1.00994	0.0202963	0.0285133		0.457438	0.0338495	0.0675517	O75607	More abundant in miR-142-KO
	0	ADRB3	Vesicle-associated membrane protein 2	VAMP2	+	1.85508	0.00907466	0.0137947	+	0.377563	0.0126819	0.0326161	J3QRU4	More abundant in miR-142-KO
	0	AGA	Short/branched chain specific acyl-CoA dehydrogenase, mitochondrial	ACADSB	+	1.61026	0.00319315	0.00556701		0.349611	0.0270935	0.0583565	A0A0S2Z3P9	More abundant in miR-142-KO
	0	AGL	E3 ubiquitin-protein ligase UBR4	UBR4	+	-0.631702	0.000391586	0.00142574		-0.167759	0.0285043	0.0602505	Q5T4S7	Less abundant in miR-142_KO
	0	ALAD	Vacuolar protein sorting-associated protein VTA1 homolog	VTA1	+	-1.03759	5.46562e-07	0	+	-0.180345	0.000593866	0.00297143	A0A087WY55	Less abundant in miR-142_KO
	0	ALAS2	F-actin-capping protein subunit alpha-1	CAPZA1	+	-0.844127	3.28478e-08	0		-0.186959	0.0496262	0.0888035	A0A024R0E5	Less abundant in miR-142_KO
	0	ABCD1	F-actin-capping protein subunit beta	CAPZB	+	-0.823338	5.45432e-07	0		-0.197797	0.0260361	0.056739	B2R7T8	Less abundant in miR-142_KO
	0	ANK1	Cleavage stimulation factor subunit 3	CSTF3	+	-1.37033	0.00162236	0.0032963	+	-0.206466	0.02254	0.0497849	Q12996	Less abundant in miR-142_KO
	0	APC	Regulator of chromosome condensation	RCC1	+	-0.784169	3.62739e-09	0	+	-0.206812	0.00738352	0.0217647	Q5T081	Less abundant in miR-142_KO
	0	FAS	Pyrroline-5-carboxylate reductase 2;Pyrroline-5-carboxylate reductase	PYCR2	+	-0.751202	0.0002406	0.000824242		-0.226666	0.037751	0.0745394	A0A0S2Z5U6	Less abundant in miR-142_KO
	0	AR	Nuclear pore complex protein Nup98-Nup96;Nuclear pore complex protein Nup98;Nuclear pore complex protein Nup96	NUP98	+	-1.02567	2.54659e-05	0.000112676	+	-0.23055	0.0211713	0.0472883	P52948	Less abundant in miR-142_KO
	0	ARG1	DNA fragmentation factor subunit alpha	DFFA	+	-0.770855	8.18309e-05	0.0004	+	-0.234235	0.0157787	0.0390797	Q53HN4	Less abundant in miR-142_KO
	0	ARSB	F-actin-capping protein subunit alpha-2	CAPZA2	+	-0.685688	0.000690825	0.0016875		-0.234816	0.0365725	0.072898	Q53GE2	Less abundant in miR-142_KO
	0	ARSE	Protein-L-isoaspartate O-methyltransferase;Protein-L-isoaspartate(D-aspartate) O-methyltransferase	PCMT1	+	-1.30486	1.09371e-07	0		-0.244175	0.0392143	0.0761314	A0A384MDK7	Less abundant in miR-142_KO
	0	ASPA	Protein RCC2	RCC2	+	-0.899123	4.12686e-07	0	+	-0.274404	0.0140939	0.0356777	A0A024RAC5	Less abundant in miR-142_KO
	0	ASS1	Moesin	HEL70	+	-0.633227	2.72809e-06	0	+	-0.282573	0.00614097	0.0192693	V9HWC0	Less abundant in miR-142_KO
	0	ATM	Ezrin;Tyrosine-protein kinase receptor	EZR	+	-1.51553	1.42396e-09	0	+	-0.315801	0.019179	0.0441368	Q6NUR7	Less abundant in miR-142_KO
	0	ATP7A	Heterochromatin protein 1-binding protein 3	HP1BP3	+	-0.857721	3.22652e-05	9.52381e-05	+	-0.350395	0.00728744	0.0218333	Q5SSJ5	Less abundant in miR-142_KO
	0	ATP7B	Dedicator of cytokinesis protein 2	DOCK2	+	-0.649115	0.00105535	0.00249825	+	-0.377623	0.00356264	0.0117621	A0A2X0SFD3	Less abundant in miR-142_KO
	0	BCHE	ADP-ribosylation factor 6	ARF6		-1.64078	0.0404475	0.0527413	+	-0.384357	0.00448628	0.0147491	Q5U025	Less abundant in miR-142_KO
	0	BCKDHB	Growth factor receptor-bound protein 2	GRB2	+	-0.633761	2.14862e-05	0	+	-0.398201	0.0043758	0.0145744	A0A384ME16	Less abundant in miR-142_KO
	0	BRCA2	Methionine aminopeptidase 2;Methionine aminopeptidase	METAP2	+	-0.633401	4.2357e-06	0	+	-0.490424	0.0159223	0.039086	A0A140VJE3	Less abundant in miR-142_KO
	0	BTK	Histone H1.5	HIST1H1B	+	-0.604968	3.5856e-05	9.09091e-05	+	-0.501611	0.000441083	0.00253659	P16401	Less abundant in miR-142_KO
	0	CA2	MOB kinase activator 3A	MOB3A	+	-1.70736	0.036738	0.0486139	+	-0.506697	0.00357471	0.0117185	Q96BX8	Less abundant in miR-142_KO
	0	CACNA1A	Guanine nucleotide-binding protein G(s) subunit alpha isoforms short;Guanine nucleotide-binding protein G(s) subunit alpha isoforms XLas	GNAS	+	-0.638674	2.84006e-05	0.000103896	+	-0.513044	3.85035e-05	0.000140351	A0A0S2Z3S5	Less abundant in miR-142_KO
	0	CBS	EF-hand domain-containing protein D2	EFHD2	+	-0.902283	0.0319642	0.0416815	+	-0.53817	0.0157076	0.0389498	A0A024QZ77	Less abundant in miR-142_KO
	0	CD36	Rho-related GTP-binding protein RhoG	ARHG	+	-1.71651	0.0117632	0.0167047	+	-0.551767	0.00312967	0.0109147	Q6ICQ8	Less abundant in miR-142_KO
	0	CD3G	Interferon regulatory factor 8	IRF8	+	-1.25603	9.4204e-05	0.000384	+	-0.572003	0.0216305	0.0481374	B2R8V7	Less abundant in miR-142_KO
	0	CD40LG	Transducin-like enhancer protein 3	TLE3		-1.35685	0.0383553	0.0503045	+	-0.602177	0.011721	0.0306801	Q6PRX3	Less abundant in miR-142_KO
	0	CDK4	Ornithine aminotransferase, mitochondrial;Ornithine aminotransferase, hepatic form;Ornithine aminotransferase, renal form	OAT	+	-0.258588	0.00326644	0.00567775	+	-0.636809	3.63883e-05	0	A0A140VJQ4	Less abundant in miR-142_KO
	0	CDKN1C	Catalase	CAT	+	-0.237291	0.0380172	0.0498657	+	-0.641248	1.63191e-05	0	A0A384P5Q0	Less abundant in miR-142_KO
	0	CDKN2A	Pyridoxal kinase	HEL-S-1a	+	-0.210461	0.00175023	0.00343202	+	-0.692352	0.00274988	0.00937652	V9HWC3	Less abundant in miR-142_KO
	0	CHRNA1	Proteasome subunit beta type;Proteasome subunit beta type-9	PSMB9	+	-1.2362	3.44183e-05	9.41176e-05	+	-0.698924	0.00729987	0.0217751	A2ACR1	Less abundant in miR-142_KO
	0	CHRNE	Inorganic pyrophosphatase 2, mitochondrial	PPA2		-1.18278	0.0441896	0.0577555	+	-0.714587	0.0186709	0.0432672	Q9H2U2	Less abundant in miR-142_KO
	0	LYST	High mobility group protein B2	HMGB2	+	-0.565128	0.000268208	0.001	+	-0.722121	0.0048718	0.0155644	P26583	Less abundant in miR-142_KO
	0	ERCC8	Proteasome subunit beta type;Proteasome subunit beta type-8	PSMB8	+	-0.81528	4.27523e-06	0	+	-0.748356	0.0124868	0.0326055	Q6FHU0	Less abundant in miR-142_KO
	0	CLCN5	Vacuolar protein sorting-associated protein 4B	VPS4B	+	-0.855485	0.0283878	0.0378624	+	-0.753431	0.00100706	0.00422599	A8K5D8	Less abundant in miR-142_KO
	0	CLN3	Dihydropyrimidinase-related protein 2	DPYSL2	+	-0.837674	0.000317631	0.0012973	+	-0.797463	0.00151522	0.00617822	Q59GB4	Less abundant in miR-142_KO
	0	CNGA1	Ubiquitin-conjugating enzyme E2 G1;Ubiquitin-conjugating enzyme E2 G1, N-terminally processed	UBE2G1	+	-0.377868	0.00630523	0.00989474	+	-0.857237	0.00897298	0.0246027	P62253	Less abundant in miR-142_KO
	0	COL1A1	L-xylulose reductase	DCXR	+	-0.18472	0.0199217	0.027923	+	-0.890274	0.000354604	0.00232143	J3KS22	Less abundant in miR-142_KO
	0	COL1A2	Gamma-enolase;Enolase	ENO2	+	-1.37271	1.06593e-05	0	+	-0.956789	0.00822914	0.0232861	Q6FHV6	Less abundant in miR-142_KO
	0	COL3A1	Ubiquitin carboxyl-terminal hydrolase 47	USP47	+	-1.41498	0.0224111	0.030933	+	-1.02336	0.0109958	0.0289744	Q96K76	Less abundant in miR-142_KO
	0	COL4A3	Serine/threonine-protein kinase 26	STK26		-0.791672	0.0424112	0.05532	+	-1.13578	0.00454811	0.0146758	Q8NBY1	Less abundant in miR-142_KO
	0	COL4A4	Signal transducer and activator of transcription 5B;Signal transducer and activator of transcription	STAT5B	+	-0.965948	5.33102e-05	0.0002	+	-1.8694	0.00152159	0.00614778	P51692	Less abundant in miR-142_KO
	0	COL5A1
	0	CP
	0	CPOX
	0	CST3
	0	CSTB
	0	CYP19A1
	0	CYP1B1
	0	DDB2
	0	DLD
	0	DMD
	0	DPYD
	0	SLC26A3
	0	SLC26A2
	0	TOR1A
	0	EDN3
	0	EDNRB
	0	EMD
	0	EPOR
	0	ERCC3
	0	ERCC5
	0	ERCC6
	0	ESR1
	0	ETFA
	0	EXT1
	0	F11
	0	F13A1
	0	F5
	0	F7
	0	F8
	0	F9
	0	FABP2
	0	FANCA
	0	FANCC
	0	FAH
	0	FBN1
	0	MS4A2
	0	FECH
	0	FGFR2
	0	FGFR3
	0	FXN
	0	FSHR
	0	FUT1
	0	FUT3
	0	G6PC
	0	GALC
	0	GALT
	0	GBE1
	0	GCH1
	0	GHR
	0	GIPR
	0	GJA1
	0	GK
	0	GLI3
	0	GLA
	0	GLDC
	0	GNAT1
	0	GP1BA
	0	GP9
	0	GPI
	0	NR3C1
	0	GSS
	0	MSH6
	0	GUSB
	0	HADHB
	0	HBG2
	0	SERPIND1
	0	CFH
	0	HGD
	0	HK1
	0	HK2
	0	HMGCL
	0	TBX5
	0	HPRT1
	0	HPS1
	0	HSD11B2
	0	SGSH
	0	ICAM1
	0	IDS
	0	IDUA
	0	CFI
	0	IL2RG
	0	INSR
	0	PDX1
	0	ITGA6
	0	ITGB3
	0	ITGB4
	0	JAG1
	0	JAK3
	0	KAL1
	0	KCNA1
	0	KCNE1
	0	KHK
	0	KIT
	0	KRT12
	0	LAMA3
	0	LEP
	0	SGCG
	0	SGCB
	0	LHCGR
	0	LIPA
	0	LPL
	0	LYZ
	0	MAOA
	0	MBL2
	0	MEN1
	0	MET
	0	CIITA
	0	MITF
	0	MLH1
	0	MSH2
	0	MTM1
	0	MTTP
	0	MTR
	0	MUT
	0	MYO5A
	0	MYOC
	0	NAGA
	0	PTCH1
	0	NDP
	0	NF1
	0	NF2
	0	PNP
	0	NPC1
	0	NPHP1
	0	OAT
	0	OCA2
	0	OCRL
	0	PAH
	0	PAX2
	0	PAX6
	0	PCBD1
	0	PDE6B
	0	PDHA1
	0	PEPD
	0	PEX12
	0	PEX7
	0	PFKM
	0	PGK1
	0	PHKA2
	0	PHKB
	0	PHKG2
	0	SERPINA1
	0	PKD1
	0	PKD2
	0	PKLR
	0	PKP1
	0	PLA2G2A
	0	PLG
	0	PLOD1
	0	PMM2
	0	PMP22
	0	PON2
	0	POU1F1
	0	POU3F4
	0	CTSA
	0	PPT1
	0	PRNP
	0	PROS1
	0	PTEN
	0	PTH
	0	PTS
	0	PEX2
	0	PEX5
	0	QDPR
	0	RB1
	0	PRPH2
	0	RHAG
	0	PITX2
	0	RLBP1
	0	RPGR
	0	RPE65
	0	RS1
	0	ATXN1
	0	ATXN7
	0	SCN4A
	0	SCN5A
	0	SGCD
	0	SLC12A1
	0	SLC12A3
	0	SLC2A2
	0	SLC3A1
	0	SLC4A1
	0	SLC5A1
	0	SMN1
	0	SNCA
	0	SOX9
	0	SPTB
	0	SRD5A2
	0	STAR
	0	STS
	0	TAT
	0	SERPINA7
	0	TCOF1
	0	TGFBI
	0	THBD
	0	TIMP3
	0	TPMT
	0	TSC1
	0	TSHR
	0	TTPA
	0	TYR
	0	UMPS
	0	VDR
	0	WAS
	0	WT1
	0	XDH
	0	XPA
	0	MID1
	0	ALDH3A2
	0	APOB
	0	BLMH
	0	SLC25A20
	0	CASR
	0	CDKN1A
	0	CHM
	0	TPP1
	0	ABCC2
	0	COL5A2
	0	CSF2RB
	0	CTSK
	0	CYBB
	0	CYB5R3
	0	EGR2
	0	EXT2
	0	GLB1
	0	GM2A
	0	GNRHR
	0	GPD2
	0	HLCS
	0	HRG
	0	HSD17B1
	0	HSD17B4
	0	IAPP
	0	IFNGR1
	0	IL2RA
	0	IL4R
	0	KRT10
	0	KRT2
	0	KRT5
	0	L1CAM
	0	LTBP2
	0	MAT1A
	0	PAFAH1B1
	0	MVK
	0	NOTCH3
	0	OXCT1
	0	PAFAH2
	0	PAX3
	0	PCSK1
	0	PDE6A
	0	SLC26A4
	0	PECAM1
	0	PHEX
	0	PSEN2
	0	RAG1
	0	RFX5
	0	SELE
	0	SHOX
	0	SLC10A2
	0	SLC5A5
	0	SOD1
	0	STK11
	0	SUOX
	0	HNF4A
	0	HNF1B
	0	TEK
	0	THPO
	0	THRB
	0	UBE3A
	0	UGT1A1
	0	BARD1
	0	PEX1
	0	TWIST1
	0	NR0B1
	0	AMPD3
	0	AMT
	0	APOC2
	0	APP
	0	AQP2
	0	ARSA
	0	ATRX
	0	CFTR
	0	COL10A1
	0	COL4A5
	0	CYP11B1
	0	CYP11B2
	0	CYP21A2
	0	ELN
	0	EYA1
	0	F2
	0	FBP1
	0	FGA
	0	FGG
	0	FSHB
	0	FUT2
	0	GALNS
	0	GDNF
	0	HBB
	0	HEXA
	0	HEXB
	0	HOXA13
	0	HOXD13
	0	HTR1A
	0	KCNJ11
	0	LDLR
	0	MC2R
	0	MPZ
	0	PLP1
	0	PMS1
	0	PMS2
	0	RAG2
	0	RFXAP
	0	RHO
	0	SFTPB
	0	TAP2
	0	TP53
	0	TYRP1
	0	VHL
	0	WRN
	0	CRX
	0	DCX
	0	GDF5
	0	HBG1
	0	CD53
	0	C8A
	0	IL5RA
	0	IL6R
	0	FCGR1A
	0	CRP
	0	FCGR3A
	0	FCGR3B
	0	CR1
	0	CD55
	0	IL1A
	0	IL1B
	0	IL1RN
	0	SLC11A1
	0	CCR5
	0	SPP1
	0	GC
	0	IL8
	0	IL15
	0	IL2
	0	C7
	0	IL3
	0	IL4
	0	IL9
	0	CD14
	0	TAP1
	0	TNF
	0	IGFBP1
	0	IGFBP2
	0	IGFBP3
	0	IGFBP5
	0	IL6
	0	HGF
	0	SERPINE1
	0	IFNA2
	0	CXCL12
	0	CD44
	0	CD59
	0	IGF2
	0	CNTF
	0	NCAM1
	0	SLC11A2
	0	IGF1
	0	IFNG
	0	NOS1
	0	HTR2A
	0	BDKRB2
	0	SERPINA5
	0	NOS2
	0	LTBP1
	0	IL10RB
	0	IFNAR1
	0	NCF4
	0	ITGAM
	0	BCL2
	0	CXCR1
	0	RFX2
	0	SOD2
	0	GSR
	0	FASLG
	0	IL11
	0	SELL
	0	NAT1
	0	ADH1A
	0	ADH1B
	0	ADH4
	0	ADH5
	0	ADH6
	0	ADH7
	0	ADORA2A
	0	ADORA2B
	0	ADRA1D
	0	ADRA1A
	0	ADRA2A
	0	ADRA2B
	0	ADRA2C
	0	ADRB1
	0	AGTR1
	0	AGTR2
	0	AHCY
	0	ALAS1
	0	ALDH1A1
	0	ALDH2
	0	ALDH1B1
	0	ALDH1A3
	0	ALDH3B1
	0	ALDH9A1
	0	ALOX12
	0	ANXA1
	0	ATP1A1
	0	ATP1A2
	0	AVPR1A
	0	TSPO
	0	CACNA1B
	0	CACNA1C
	0	CACNA1D
	0	CACNA1E
	0	CACNB1
	0	CACNB2
	0	CACNB3
	0	CACNB4
	0	CACNG1
	0	CALCB
	0	CD3E
	0	CD247
	0	CGA
	0	CHRM2
	0	CHRM3
	0	CHRNA3
	0	CHRNA4
	0	CHRNA5
	0	CHRNA7
	0	CHRNB2
	0	CHRNB3
	0	CHRNB4
	0	CHRND
	0	CRAT
	0	CRH
	0	CSF1
	0	CSF2
	0	CSF3R
	0	CYP1A2
	0	CYP3A7
	0	CYP2B6
	0	CYP2C8
	0	CYP2C18
	0	CYP2F1
	0	CYP2J2
	0	CYP3A5
	0	CYP4A11
	0	CYP4B1
	0	CYP7A1
	0	CYP24A1
	0	CYP26A1
	0	CYP27A1
	0	CYP27B1
	0	CYP51A1
	0	DCK
	0	ACE
	0	DDC
	0	DHFR
	0	DIO2
	0	DRD1
	0	DRD2
	0	DRD4
	0	DRD5
	0	EPO
	0	FGF1
	0	FKBP1A
	0	GABRA1
	0	GABRA2
	0	GABRA3
	0	GABRA4
	0	GABRA5
	0	GABRA6
	0	GABRB1
	0	GABRB2
	0	GABRB3
	0	GABRD
	0	GABRG2
	0	GAD1
	0	GAD2
	0	GART
	0	GAS6
	0	GGCX
	0	GLRB
	0	GRIA2
	0	GRIA1
	0	GRIA3
	0	GRIA4
	0	GRIK3
	0	GRIN2A
	0	GRIN2D
	0	GRM2
	0	GRM3
	0	GRM4
	0	GRM5
	0	GRM6
	0	GRM7
	0	GRM8
	0	GSTA2
	0	GSTM3
	0	GSTM4
	0	GSTM5
	0	GSTT2
	0	GUCY1A2
	0	GUCY1A3
	0	GUCY1B3
	0	HMGCR
	0	HPGD
	0	HRH1
	0	HTR1D
	0	HTR1E
	0	HTR1F
	0	HTR2B
	0	HTR2C
	0	HTR4
	0	HTR7
	0	IFNAR2
	0	IGF1R
	0	IGF2R
	0	IL1R1
	0	IL2RB
	0	IL7
	0	IL12A
	0	ITGA4
	0	ITGAX
	0	ITGB6
	0	KCNJ5
	0	KCNJ2
	0	KNG1
	0	LTA4H
	0	CYP4F3
	0	MAOB
	0	KITLG
	0	MGP
	0	NR3C2
	0	MME
	0	NQO1
	0	NPY
	0	NPR1
	0	NPR3
	0	NPY1R
	0	NPY2R
	0	OPRK1
	0	OPRL1
	0	OPRM1
	0	OXTR
	0	P4HA1
	0	PAM
	0	PDE3A
	0	PDE3B
	0	PDE4C
	0	PDHB
	0	PGR
	0	ABCB1
	0	PLA2G5
	0	PLAT
	0	PLCB3
	0	PLCB4
	0	SERPINF2
	0	PLOD2
	0	POLR2A
	0	POLR2B
	0	PON3
	0	PPIB
	0	PPIC
	0	PPP3CA
	0	PPP3R1
	0	PRIM2
	0	PRLR
	0	PRRG1
	0	PTAFR
	0	PTGDR
	0	PTGER2
	0	PTGER4
	0	PTGFR
	0	PTGIS
	0	PTGS1
	0	PTGS2
	0	RARA
	0	RARB
	0	RARG
	0	RPL13
	0	RPL19
	0	RPL22
	0	RPL23A
	0	RPL27
	0	RPL27A
	0	RPL28
	0	RPL32
	0	RPL34
	0	RPL37
	0	ITSN1
	0	SLC2A9
	0	ATP2B1
	0	PRKCSH
	0	REEP3
	0	ATP2B2
	0	ATP2B3
	0	NKIRAS2
	0	DNAJB3
	0	LMO3
	0	ATP2B4
	0	ZNF676
	0	CALHM1
	0	GOLGA6L1
	0	NCCRP1
	0	TBC1D3B
	0	TBC1D3C
	0	SMAD5
	0	STX16
	0	CCL4L1
	0	C16orf87
	0	CCL3L3
	0	LSS
	0	UBE2W
	0	ZDHHC13
	0	PTER
	0	ATP2C1
	0	NDUFV3
	0	UGP2
	0	RORC
	0	GRB10
	0	IDNK
	0	GALK2
	0	GDF6
	0	GGA1
	0	TIMM50
	0	PDE9A
	0	MED8
	0	LYRM5
	0	ZNF425
	0	ZNF782
	0	TMEM211
	0	SPOPL
	0	CYP27C1
	0	ZNF470
	0	ARHGEF37
	0	MAP3K15
	0	C4orf3
	0	C9orf170
	0	DDI1
	0	LCN10
	0	FARP1
	0	RFWD2
	0	TOMM5
	0	C8orf82
	0	ITIH5
	0	PIM3
	0	C14orf37
	0	TPD52L3
	0	HSFY2
	0	RUNX1
	0	ANO7
	0	TTC3
	0	UBASH3A
	0	MTUS1
	0	PPARA
	0	LHX8
	0	ATP5A1
	0	AFAP1L2
	0	C9orf47
	0	FAM13C
	0	ATP5C1
	0	PLEKHA1
	0	ATE1
	0	PAMR1
	0	USP16
	0	GPM6B
	0	EXOSC10
	0	RPLP0
	0	GMPR2
	0	NT5C1B
	0	NT5C3A
	0	CLDN18
	0	ECHDC1
	0	HN1
	0	FAM109B
	0	KLK2
	0	AFTPH
	0	ANAPC11
	0	AWAT2
	0	SUMO4
	0	LCLAT1
	0	ATP5G3
	0	CAPRIN2
	0	ZFYVE27
	0	EPSTI1
	0	MARCH8
	0	EXOSC3
	0	FCGR2B
	0	WLS
	0	FMO3
	0	GATA3
	0	GOLGA7
	0	NFU1
	0	SFR1
	0	BPY2B
	0	BPY2C
	0	DNAJB12
	0	MCTP1
	0	SMC4
	0	PDE4DIP
	0	RAB11FIP1
	0	WNK3
	0	ZNF280D
	0	ANXA2
	0	BTBD7
	0	DERL3
	0	THOC5
	0	CBY1
	0	XKRY2
	0	GPATCH8
	0	C1orf173
	0	PTRH1
	0	FAM150B
	0	IGFL4
	0	TWISTNB
	0	RPLP1
	0	TPD52L1
	0	BICD1
	0	CACNA1I
	0	ABLIM1
	0	SMAD2
	0	C1orf95
	0	LDLRAD4
	0	C11orf49
	0	LEPR
	0	HMGXB4
	0	TMEM200B
	0	PDE1A
	0	UQCR10
	0	SMAD1
	0	RREB1
	0	ARHGEF35
	0	OSBPL8
	0	RECQL5
	0	GLE1
	0	KLHL31
	0	RABL2B
	0	ERLIN2
	0	RBMS3
	0	MGLL
	0	GTF2IRD2B
	0	NHP2L1
	0	BICD2
	0	DLGAP1
	0	HNRNPD
	0	TEX11
	0	TRIM6
	0	TRIM6-TRIM34
	0	TRIM34
	0	PARVB
	0	SLC6A19
	0	SP5
	0	MED15
	0	CDY1B
	0	MANBAL
	0	EVI2A
	0	PARP3
	0	TXNDC8
	0	TSPYL6
	0	BMF
	0	ANXA13
	0	CAPNS1
	0	FBLN2
	0	DYRK3
	0	GPRASP2
	0	AKAP2
	0	NOMO3
	0	GRK6
	0	TUSC1
	0	ALG11
	0	QSOX1
	0	CD200
	0	OR13A1
	0	C10orf90
	0	ZNF813
	0	C1orf168
	0	ZNF740
	0	CCDC144NL
	0	ZCCHC16
	0	TMEM220
	0	LIN28B
	0	PAPL
	0	AGMO
	0	ZNF705A
	0	DBX2
	0	PLEKHG7
	0	GPR179
	0	ZYG11A
	0	FCGR1B
	0	TRIM67
	0	MAP1LC3C
	0	SPDYE3
	0	LOC100506422
	0	NRARP
	0	FGFRL1
	0	DPP10
	0	UMODL1
	0	CLEC2D
	0	SLC30A2
	0	ITGA11
	0	ANKRD34B
	0	OR4M2
	0	NCK2
	0	OR5B12
	0	OR5M3
	0	RPS3
	0	OR52K1
	0	TRIM37
	0	TMEM198
	0	LRRC55
	0	OR9Q1
	0	FRG2
	0	OR4N4
	0	PKP2
	0	CHD3
	0	PSRC1
	0	SREBF1
	0	HNRNPL
	0	RGS10
	0	GPNMB
	0	AK4
	0	PRR13
	0	KDM2B
	0	ZNF32
	0	DAZ4
	0	PLAUR
	0	ACTR2
	0	NFASC
	0	YPEL2
	0	CACNA1H
	0	NEURL4
	0	SF3A1
	0	ZWINT
	0	MARCH2
	0	EBF3
	0	PLCXD3
	0	NFKBIZ
	0	PKP4
	0	RHBDF2
	0	CPM
	0	CACNA2D2
	0	SF3B1
	0	FAM19A4
	0	EDA
	0	CHEK2
	0	FPR2
	0	VPS54
	0	NUMB
	0	FAM21A
	0	GJB3
	0	CHMP3
	0	SUMO1
	0	HAO2
	0	DAZ2
	0	SUMO2
	0	ZNF835
	0	ZNF780B
	0	ATP8B2
	0	RYK
	0	ERBB2
	0	IP6K2
	0	JMJD8
	0	YBEY
	0	IP6K1
	0	RBMY1J
	0	RBMY1E
	0	RBMY1D
	0	RBMY1B
	0	ERBB2IP
	0	FAM69A
	0	SIAH1
	0	WBP5
	0	MAPKAP1
	0	WDR33
	0	PDPN
	0	ARHGAP17
	0	GTDC1
	0	RAB37
	0	TCEAL1
	0	SLC25A25
	0	FAM149A
	0	ZNF473
	0	WDR35
	0	CR2
	0	RPS6KA1
	0	APOBEC3F
	0	TCEAL8
	0	RPS6KA2
	0	TCEAL4
	0	LRRC18
	0	RPS6KA4
	0	LRIF1
	0	SDC1
	0	RPS4X
	0	ODF2L
	0	GOSR1
	0	ALG8
	0	CLEC6A
	0	SDCBP
	0	ZSCAN2
	0	KLHL5
	0	C8orf48
	0	ZNF37A
	0	NTRK2
	0	SCP2
	0	ZNF484
	0	L3MBTL3
	0	FSD2
	0	NTRK3
	0	ZNF483
	0	C8orf22
	0	DEPDC5
	0	IGIP
	0	CACYBP
	0	IGF2BP2
	0	SPOP
	0	ARHGAP25
	0	IGSF3
	0	METTL13
	0	IFRD1
	0	BRWD1
	0	ZNF599
	0	ERV3-1
	0	KLHDC9
	0	PRDM2
	0	PLA2R1
	0	DUSP13
	0	EI24
	0	TRIM13
	0	TULP4
	0	SFI1
	0	SMARCB1
	0	TRPM3
	0	NWD1
	0	LMBRD2
	0	NKAPL
	0	PPP1R27
	0	C3orf56
	0	SHISA2
	0	CDHR4
	0	CT45A5
	0	CSDE1
	0	SS18
	0	IRGQ
	0	IGFBPL1
	0	TFG
	0	C2CD4B
	0	BUB3
	0	CEPT1
	0	OPTN
	0	COA5
	0	CPLX2
	0	ZDHHC9
	0	C1QL4
	0	UACA
	0	CNOT4
	0	FAM154B
	0	MOG
	0	C18orf25
	0	REG3G
	0	CISD2
	0	UMOD
	0	CGGBP1
	0	CCDC73
	0	CTDSPL
	0	C4orf46
	0	EID3
	0	LAMTOR4
	0	WDHD1
	0	GPX8
	0	ZNF761
	0	C14orf180
	0	BCAP29
	0	STEAP3
	0	SLC41A3
	0	2002-09-01
	0	ENAH
	0	ISX
	0	TMEM64
	0	PIWIL3
	0	MXRA7
	0	LGMN
	0	TCHHL1
	0	KIAA2022
	0	SLC7A2
	0	CXCR4
	0	MXI1
	0	USP20
	0	NUPL1
	0	TPST2
	0	PICALM
	0	CCBL2
	0	CST9
	0	LPHN1
	0	C6orf1
	0	EML1
	0	CHAC2
	0	RBPMS
	0	CCDC147
	0	WDR89
	0	ZNF121
	0	LOC401052
	0	FNIP1
	0	C6orf226
	0	TDP1
	0	CTAGE15
	0	FBXO47
	0	SPDYA
	0	FAT3
	0	SLC35D3
	0	CD200R1L
	0	CCT3
	0	ZNF468
	0	DSP
	0	NIPA2
	0	CUL4A
	0	TCP1
	0	STK16
	0	CKAP5
	0	STATH
	0	GEMIN2
	0	ACSL6
	0	CCT6A
	0	PPP2CB
	0	MFAP3L
	0	SH3D19
	0	CDKL4
	0	CLSTN1
	0	CCT7
	0	CADPS2
	0	C20orf202
	0	LBX2
	0	BRD9
	0	KIAA0930
	0	ZCCHC11
	0	C12orf29
	0	KIAA2018
	0	B3GNTL1
	0	LUZP2
	0	VPS8
	0	RCHY1
	0	TMEM230
	0	HRNR
	0	SSBP3
	0	ZNF655
	0	ERMN
	0	C20orf194
	0	ZNF648
	0	FAM168B
	0	RIPPLY2
	0	C10orf62
	0	SSBP4
	0	KDM1A
	0	ARHGAP28
	0	IRAK1BP1
	0	ACSM2A
	0	SHE
	0	LRRC38
	0	NRG3
	0	ZNF766
	0	CLVS2
	0	PM20D2
	0	TTC7B
	0	RNF187
	0	LPPR5
	0	SPIN3
	0	TMEM201
	0	IBA57
	0	TDRD6
	0	FAM83B
	0	TECRL
	0	SLC25A30
	0	TMEM244
	0	ZIK1
	0	ZNF780A
	0	FAM102B
	0	ACER2
	0	ZC3H12B
	0	MTX3
	0	RSPH4A
	0	ERCC6L2
	0	SLC6A17
	0	C6orf222
	0	GLYATL3
	0	NUGGC
	0	C1QL3
	0	MUC21
	0	CASC10
	0	C10orf120
	0	PTPLAD2
	0	GOLGA7B
	0	FAM26F
	0	BCL2L15
	0	THEMIS
	0	FAM171A1
	0	HES5
	0	TIAM2
	0	RAP1A
	0	TNK2
	0	RAP1B
	0	SAMD13
	0	ZYX
	0	BCAS4
	0	METTL21C
	0	NCMAP
	0	AFMID
	0	GLT8D1
	0	SPRTN
	0	ATP11C
	0	IFIT1B
	0	HERPUD1
	0	PDLIM5
	0	FYTTD1
	0	MAGEA10
	0	MAGEA11
	0	DSTN
	0	SLC5A9
	0	MAGEA4
	0	C1GALT1C1
	0	SLC9A4
	0	2007-09-01
	0	SLC13A3
	0	CDK5RAP2
	0	ZMAT1
	0	TRAPPC2
	0	PCGF6
	0	CREB5
	0	CHCHD7
	0	HAUS8
	0	MVB12B
	0	LECT1
	0	OLA1
	0	PNLIPRP3
	0	NAA30
	0	XKR7
	0	XKR9
	0	BTBD1
	0	RPS8
	0	MSL1
	0	RNASE13
	0	CENPP
	0	BIRC5
	0	SOGA3
	0	MCRS1
	0	ARSI
	0	ANO9
	0	ZNF302
	0	CTNNBIP1
	0	MDK
	0	DNAJC21
	0	WDR31
	0	OPCML
	0	AKTIP
	0	SGOL1
	0	SOHLH1
	0	MS4A13
	0	MYLK4
	0	ANKRD20A3
	0	ANKRD20A2
	0	C1orf146
	0	FOXP4
	0	ASB11
	0	FAM221B
	0	ZSCAN23
	0	SEC61G
	0	U2AF2
	0	CCDC66
	0	SLC45A2
	0	GOSR2
	0	GRP
	0	ITM2C
	0	CTBP1
	0	GRAMD2
	0	ARGFX
	0	RGR
	0	AGPAT2
	0	DUXA
	0	DCTD
	0	ABI1
	0	ZNF763
	0	NHLRC3
	0	SLC25A53
	0	ZNF260
	0	NUDT17
	0	RGMB
	0	DISC1
	0	KLK6
	0	DDX60L
	0	SPIN4
	0	LRRC73
	0	PABPC1L2A
	0	SATL1
	0	ZKSCAN2
	0	UBE2NL
	0	KNOP1
	0	C9orf152
	0	SNX30
	0	SORCS1
	0	LSP1
	0	CCNC
	0	CXorf66
	0	KRIT1
	0	FBXW7
	0	MPST
	0	SEH1L
	0	FXR1
	0	AWAT1
	0	LURAP1
	0	ALG10B
	0	FAM53A
	0	ZC2HC1B
	0	C1orf192
	0	DCAF12L2
	0	AADACL4
	0	C12orf68
	0	C1orf137
	0	FAM227A
	0	C2orf68
	0	PRR23B
	0	ZNF793
	0	C17orf97
	0	FIGNL2
	0	PRAMEF3
	0	LDLRAD2
	0	SMCO3
	0	H3F3C
	0	EIF2AK4
	0	PLIN5
	0	RFPL4B
	0	TMEM225
	0	ZNF107
	0	RLTPR
	0	EXOC7
	0	C8orf58
	0	SLTM
	0	EXOC6
	0	DCUN1D2
	0	SUPT20H
	0	FLG2
	0	KATNAL1
	0	AKT1
	0	LHX9
	0	USP21
	0	CRYM
	0	NLE1
	0	CPZ
	0	FBXO44
	0	ILK
	0	KCNMA1
	0	CRMP1
	0	FAM96A
	0	PAK4
	0	NCDN
	0	TM9SF1
	0	ZNF638
	0	GLTPD2
	0	LAT
	0	MRPL22
	0	FAM13A
	0	BAG5
	0	RUNX2
	0	MPG
	0	HDAC5
	0	PURG
	0	PHF6
	0	AURKC
	0	PAPSS2
	0	TSC22D3
	0	DNAJC25
	0	RAE1
	0	IGSF11
	0	KHDC3L
	0	RFFL
	0	MSMO1
	0	SP3
	0	SLC27A6
	0	SAMD3
	0	TLR10
	0	SUGP2
	0	TMCC1
	0	ZNF2
	0	TRIM36
	0	LGR6
	0	MAEA
	0	GOPC
	0	USP1
	0	SPRR2B
	0	ESCO2
	0	ALDH18A1
	0	KCNK2
	0	PGBD2
	0	CALN1
	0	DNTT
	0	BTBD11
	0	SIRT3
	0	ARHGAP8
	0	PRR5
	0	CARD16
	0	INPP5D
	0	CYB561
	0	RCCD1
	0	DAPL1
	0	VMAC
	0	ERMAP
	0	C14orf28
	0	LRIT2
	0	ZHX1
	0	CCDC58
	0	DCAF8L1
	0	HSP90AA1
	0	MARVELD3
	0	KIAA2026
	0	TMEM30B
	0	P4HA2
	0	HFM1
	0	RAB28
	0	VMA21
	0	RNF215
	0	OPA3
	0	ACTBL2
	0	SH3PXD2B
	0	GNG10
	0	KAZN
	0	TPM1
	0	SH3BP5
	0	CMC4
	0	MTCP1
	0	VPS13A
	0	SFMBT2
	0	EPM2A
	0	MAP3K19
	0	POLR3H
	0	PFKFB2
	0	LRP8
	0	BRCC3
	0	VLDLR
	0	TFEC
	0	SERBP1
	0	FRMPD2
	0	PCK2
	0	FPGS
	0	VPS13C
	0	NARG2
	0	GCOM1
	0	MYZAP
	0	POLR2M
	0	FAHD1
	0	SERF2
	0	PIR
	0	PODXL
	0	FANCB
	0	FANCD2
	0	MURC
	0	NME1-NME2
	0	NME2
	0	HAX1
	0	PUM1
	0	MYADM
	0	RPS20
	0	ZSCAN26
	0	ZNF805
	0	GOLGA8B
	0	IQCB1
	0	ABCC5
	0	HNMT
	0	FBLIM1
	0	GPHN
	0	ARF1
	0	BAALC
	0	TM2D2
	0	RGAG4
	0	RGPD1
	0	MSS51
	0	ZNF772
	0	LOC154872
	0	LRRC66
	0	FEZF1
	0	RAB3IP
	0	CANX
	0	KALRN
	0	PRAMEF13
	0	SH3KBP1
	0	ACTL10
	0	FBXO48
	0	ZNF688
	0	MECR
	0	CD276
	0	APLP1
	0	BCL7A
	0	RNASE12
	0	TNRC6B
	0	SLC6A9
	0	TGFBR2
	0	ZNF197
	0	CEACAM1
	0	CBWD5
	0	EXOC1
	0	WASF1
	0	MINK1
	0	SLC2A11
	0	YIPF5
	0	FNBP1L
	0	SC5D
	0	ARPC4
	0	RPS23
	0	ARPP21
	0	CELF2
	0	MBP
	0	CELF4
	0	ABCF1
	0	PSMA8
	0	CSN1S1
	0	CSNK1A1
	0	ADAR
	0	AFF3
	0	CD34
	0	CD97
	0	CES1
	0	CHI3L2
	0	CHN1
	0	AP2M1
	0	CLLU1OS
	0	CLLU1
	0	TSPAN4
	0	IRAK1
	0	TAF5L
	0	DUT
	0	TPD52
	0	C3orf70
	0	RAB12
	0	ANO6
	0	AARD
	0	VEGFA
	0	SPAG16
	0	NDEL1
	0	AMMECR1
	0	ARFIP1
	0	CELF1
	0	ARRDC2
	0	ARHGAP24
	0	ABHD17B
	0	TTLL3
	0	RPS25
	0	TCAIM
	0	PDE8B
	0	SLC35F1
	0	KCTD21
	0	FBXO43
	0	NANOS2
	0	C6orf120
	0	KIAA1755
	0	SOWAHB
	0	RSPO4
	0	RGS7BP
	0	CIB4
	0	AHDC1
	0	C2orf71
	0	PLEKHG1
	0	FAM24A
	0	PGAM4
	0	ZFAT
	0	CDNF
	0	DCAF4L1
	0	KIAA0101
	0	ZNF181
	0	SLC10A7
	0	RPS29
	0	GRB7
	0	CPLX3
	0	AP2B1
	0	AP1G1
	0	KLK3
	0	ARHGAP5
	0	PPAPDC1A
	0	SAMD5
	0	ARNTL
	0	ATF3
	0	SPN
	0	CERKL
	0	RPS28
	0	COX19
	0	SPDYE2
	0	ZNF451
	0	SMAGP
	0	MS4A3
	0	CYB5RL
	0	MSRB3
	0	RUNX3
	0	CTNS
	0	SRSF7
	0	TP53BP2
	0	PLAA
	0	FAM131B
	0	LRRC17
	0	HHLA3
	0	SCMH1
	0	RBFOX2
	0	PRPF40B
	0	FAM198B
	0	NT5DC3
	0	ELP6
	0	RNLS
	0	KLHL7
	0	ERGIC1
	0	TRMT11
	0	MCUR1
	0	IQCH
	0	NABP1
	0	GSTCD
	0	ATAT1
	0	DNAJB14
	0	DDX59
	0	C19orf12
	0	MRI1
	0	YTHDC1
	0	CALML4
	0	TMEM150A
	0	MANEAL
	0	C6orf165
	0	VSTM4
	0	C12orf40
	0	LYPD5
	0	LIMK2
	0	LLGL2
	0	MAF
	0	CSNK1G3
	0	SERPINB8
	0	MASP1
	0	PSG6
	0	INSC
	0	STXBP1
	0	MMP28
	0	RCE1
	0	TFAP2A
	0	KLF10
	0	TMPO
	0	NR2C1
	0	UBE2V1
	0	SLC35A2
	0	ZNF207
	0	STK24
	0	MINOS1
	0	SPINT1
	0	ZNF226
	0	PLGLB1
	0	HNRNPH2
	0	GPR126
	0	PJA1
	0	RAB41
	0	USP48
	0	KYNU
	0	CBFA2T2
	0	RRM1
	0	RPAIN
	0	FBXO7
	0	EXTL2
	0	CYFIP1
	0	GLUL
	0	GPR155
	0	C17orf62
	0	NPNT
	0	NLRP1
	0	AIPL1
	0	MAGI1
	0	AMD1
	0	MYCL
	0	MACROD2
	0	PAIP2
	0	ENTPD8
	0	SRGAP3
	0	SAR1B
	0	TMEM98
	0	CSTF3
	0	WIPI2
	0	CSTF1
	0	BABAM1
	0	TOM1L2
	0	SPECC1
	0	PPM1B
	0	DYX1C1
	0	PHF12
	0	FAM229B
	0	RHOT1
	0	AMZ2
	0	DUSP28
	0	UNC45B
	0	SGK3
	0	MTUS2
	0	BBS9
	0	LY9
	0	ZNF404
	0	ZNF704
	0	TRAF5
	0	TIAL1
	0	UBA52
	0	CALCA
	0	RRM2
	0	ERP29
	0	ALDH1L2
	0	EXOSC9
	0	KCNIP1
	0	ITPRIPL2
	0	FAM134B
	0	SMOC1
	0	ESRP1
	0	SORBS1
	0	RYR2
	0	KCNIP4
	0	C18orf32
	0	RABGAP1L
	0	UFD1L
	0	FAM102A
	0	VPS26A
	0	SDHC
	0	DMKN
	0	GTF3C2
	0	FAM129B
	0	RYR3
	0	SCN1B
	0	UNKL
	0	AGAP1
	0	NRCAM
	0	CNTROB
	0	CYS1
	0	ACOT1
	0	FAM220A
	0	ARL4A
	0	FOXK1
	0	ACPL2
	0	ARL5A
	0	ZNF829
	0	GGPS1
	0	EIF3B
	0	BCO2
	0	PALM2
	0	THYN1
	0	CEP112
	0	TRIM16L
	0	SMIM21
	0	CYFIP2
	0	USP14
	0	HELZ2
	0	PDE4B
	0	RUFY3
	0	DYNLL1
	0	NBPF8
	0	SCML1
	0	PHYH
	0	AGPAT3
	0	HEPN1
	0	SCD5
	0	CTLA4
	0	BTF3
	0	GATSL3
	0	C12orf74
	0	NBPF9
	0	ZNF630
	0	NPM1
	0	NCKAP5L
	0	HSD17B10
	0	ZNF284
	0	REV1
	0	DIXDC1
	0	SCNN1A
	0	DLX1
	0	MARVELD2
	0	B3GALNT1
	0	RSPO1
	0	GOLGA6A
	0	CDC42SE2
	0	CDC42SE1
	0	SCNN1G
	0	LRTM2
	0	ARL17B
	0	PRPS2
	0	TRIM71
	0	FER1L6
	0	ALOX15B
	0	TRIOBP
	0	RGS21
	0	TTPAL
	0	ALG13
	0	ATAD3C
	0	EFEMP1
	0	SLC25A29
	0	ZBTB7C
	0	ATP6V1C2
	0	ATP6V1E1
	0	HEPACAM2
	0	NDUFAF5
	0	C10orf25
	0	SPATA6L
	0	MPEG1
	0	TBC1D28
	0	ATP6V0B
	0	ELMO1
	0	SRSF5
	0	RGS19
	0	MARK2
	0	THEMIS2
	0	AREL1
	0	ETNK1
	0	CD151
	0	FHL2
	0	VWA5B1
	0	SKA1
	0	MAP2
	0	GK5
	0	DNAJB2
	0	AP1S3
	0	KREMEN1
	0	SEC14L1
	0	KCNC4
	0	CCNL2
	0	MAP9
	0	PICK1
	0	DPH2
	0	USP9X
	0	ZNF705D
	0	CREBZF
	0	PRMT5
	0	ZMYM5
	0	MTL5
	0	TIRAP
	0	YIF1B
	0	CHTF8
	0	TYW5
	0	SNAPC3
	0	OLAH
	0	TRO
	0	C7orf63
	0	SDCCAG3
	0	DEDD
	0	C4orf29
	0	SLC22A10
	0	EML6
	0	FAM196A
	0	TMEM232
	0	TMPPE
	0	CBLN3
	0	AIM1L
	0	CCNI2
	0	CDC42
	0	CDK20
	0	CHIC1
	0	ARHGAP11B
	0	ACBD7
	0	MDH1B
	0	SYNE4
	0	FKRP
	0	ANKRD34A
	0	ZNF674
	0	C15orf56
	0	ZNF384
	0	CHN2
	0	INTS6
	0	SGSM1
	0	MESP2
	0	SLC4A8
	0	GPER1
	0	PTPN5
	0	MLLT4
	0	MEOX1
	0	TCERG1
	0	SWI5
	0	FAM3C
	0	SIRPA
	0	FAM133B
	0	CD68
	0	C3orf72
	0	SPATA31A2
	0	ANXA8
	0	ENPP2
	0	SPTSSB
	0	NSG1
	0	OPALIN
	0	MUC17
	0	HVCN1
	0	MLH3
	0	NRF1
	0	ACTR3B
	0	SCN2A
	0	SERPINB7
	0	SCN3B
	0	PEG10
	0	SLAIN1
	0	CEP44
	0	H2AFY
	0	SPOCK3
	0	LFNG
	0	AKR1E2
	0	MCHR2
	0	CLDND1
	0	ZNF765
	0	PAQR3
	0	NKAIN2
	0	DCLK2
	0	ADAMTSL1
	0	TYSND1
	0	SYCP2L
	0	ESR2
	0	CD83
	0	TBC1D3G
	0	DMRTC2
	0	PAPD5
	0	DCUN1D4
	0	PRDM15
	0	PCDH17
	0	COA3
	0	ZCWPW2
	0	SPINK9
	0	YARS2
	0	C6orf48
	0	CCDC112
	0	ZBTB8A
	0	PHF11
	0	ASB1
	0	MTMR12
	0	FAM63B
	0	SIDT2
	0	RHBDD2
	0	ERAP1
	0	TMEM70
	0	NCALD
	0	PRKAG2
	0	CRCP
	0	ACP1
	0	ZXDC
	0	TTC23
	0	METTL21D
	0	GAGE1
	0	PPAN-P2RY11
	0	STEAP2
	0	INCENP
	0	UEVLD
	0	HEY1
	0	SYPL2
	0	FAM228A
	0	PTPRD
	0	KIAA0895L
	0	GDAP1
	0	ABCE1
	0	SI
	0	SLC2A4
	0	FAM110A
	0	CYLD
	0	PTPN20B
	0	RALGDS
	0	PGP
	0	CEP63
	0	PREPL
	0	PTPN20A
	0	PPP4R1
	0	CCDC41
	0	NAAA
	0	USP44
	0	CEP170
	0	HMGCLL1
	0	GLIS3
	0	PSPC1
	0	ZNF596
	0	RUFY2
	0	WHSC1
	0	CENPA
	0	FAM98B
	0	ZC2HC1C
	0	ST3GAL5
	0	CAST
	0	MST4
	0	FILIP1L
	0	TMEM80
	0	PSAP
	0	MLPH
	0	SUMF2
	0	ABHD12
	0	ACBD5
	0	ZNF565
	0	CEP85L
	0	CARHSP1
	0	AJAP1
	0	GEMIN8
	0	FRMD6
	0	TPK1
	0	DLGAP4
	0	GTF2H2D
	0	SMIM8
	0	SLC12A6
	0	PABPC1L2B
	0	ZNF706
	0	DIAPH3
	0	C2orf88
	0	SPRED3
	0	MINA
	0	AGAP3
	0	SLC9A6
	0	NCBP2
	0	GLRA3
	0	LTBP4
	0	ATPAF1
[truncated: 11,807 more rows]

## Sheet: Zsmf Abgl
			Protein names	Gene names	Significant BJAB	Log 2 Fold Change BJAB_KO_BJAB_WT	Student's T-test p-value BJAB_KO_BJAB_WT	Student's T-test q-value BJAB_KO_BJAB_WT	Significant SUDHL4	Log 2 Fold Change SUDHL4_KO_SUDHL4_WT	Student's T-test p-value SUDHL4_KO_SUDHL4_WT	Student's T-test q-value SUDHL4_KO_SUDHL4_WT	Uniprot Accession	Abundance		onco/sup	Comparison with target prediction miRWalk2.0 for miR-142-5p	Comparison with miR-142-5p miRTaRBase-targets (strong evidence)
	neg		4-aminobutyrate aminotransferase, mitochondrial	ABAT	+	1.79157	0.000975685	0.0023	+	1.7834	0.001733	0.00662857	X5D8S1	More abundant in miR-142-KO	https://pubmed.ncbi.nlm.nih.gov/32093682/	s	+	-
	neg		Acetyl-CoA carboxylase 1;Biotin carboxylase	ACACA	+	1.1022	0.0374565	0.0491877	+	1.2893	0.0155873	0.0385721	Q13085	More abundant in miR-142-KO	https://pubmed.ncbi.nlm.nih.gov/29056512/	o	-	-
	neg		Short/branched chain specific acyl-CoA dehydrogenase, mitochondrial	ACADSB	+	1.61026	0.00319315	0.00556701	-	0.349611	0.0270935	0.0583565	A0A0S2Z3P9	More abundant in miR-142-KO		n.a.	+	-
	neg		Long-chain-fatty-acid--CoA ligase 1	ACSL1	+	0.304949	0.00301332	0.00531593	+	1.50148	1.2696e-05	0	A8K9T3	More abundant in miR-142-KO	https://doi.org/10.3390/ijms20153624	o	+	-
			ADP-ribosylation factor 4	ARF4	+	0.692647	3.19477e-08	0	+	0.761308	6.77352e-06	0	P18085	More abundant in miR-142-KO		n.a.	+	-
	ARL2 pos		ADP-ribosylation factor-like protein 3	ARL3	+	0.241739	0.00249601	0.0042865	+	1.2202	7.05998e-06	0	P36405	More abundant in miR-142-KO	https://pubmed.ncbi.nlm.nih.gov/31234870/	s	+	-
	neg		Asparagine synthetase [glutamine-hydrolyzing]	ASNS	+	0.305325	0.00321831	0.00553846	+	0.762858	0.000414652	0.00252459	P08243	More abundant in miR-142-KO		n.a.	+	-
			Cofilin-2	CFL2	+	3.64732	7.94012e-07	0	+	5.24144	1.68085e-08	0	Q549N0	More abundant in miR-142-KO	https://pubmed.ncbi.nlm.nih.gov/29342841/	o	+	-
			Chloride intracellular channel protein;Chloride intracellular channel protein 4	CLIC4	+	0.736019	1.16299e-05	0	+	1.25306	2.48577e-06	0	Q6FIC5	More abundant in miR-142-KO	https://pubmed.ncbi.nlm.nih.gov/22387366/	s	+	-
	neg		COP9 signalosome complex subunit 7a	COPS7A	+	0.352034	0.026133	0.0352022	+	1.5223	0.00706683	0.0215783	Q9UBW8	More abundant in miR-142-KO	https://www.nature.com/articles/s41388-019-0934-z	o	+	-
	neg		Cytochrome c oxidase subunit 6B1	COX6B1	+	0.666811	0.000422912	0.00147368	+	0.596279	0.000402553	0.00246667	P14854	More abundant in miR-142-KO		n.a.	-	-
	neg		Cysteine and glycine-rich protein 1	CSRP1	+	0.552369	0.000354018	0.0013125	+	0.615301	0.000307877	0.00225243	B4DY28	More abundant in miR-142-KO		n.a.	+	-
	neg		Cytochrome c	CYCS	+	0.268023	0.000980562	0.00232028	+	0.686782	5.26172e-06	0	C9JFR7	More abundant in miR-142-KO		n.a.	+	-
	neg		Endoplasmic reticulum resident protein 44	ERP44	+	0.172078	0.0180973	0.025465	+	1.22677	4.39199e-08	0	A0A384MEE7	More abundant in miR-142-KO	https://pubmed.ncbi.nlm.nih.gov/34493236/	o	+	-
	neg		Glia maturation factor beta	GMFB	+	0.409428	0.0120458	0.0171009	+	0.998693	2.53589e-05	0	P60983	More abundant in miR-142-KO	https://pubmed.ncbi.nlm.nih.gov/27655328/	s	+	-
	neg		Mannose-1-phosphate guanyltransferase beta	GMPPB	+	1.44457	0.00816487	0.0121712	+	0.516726	0.00432628	0.0144722	A0A024R2X1	More abundant in miR-142-KO		n.a.	-	-
	neg		Vigilin	HDLBP	+	0.468304	7.20765e-05	0.000421053	+	0.683604	0.000203275	0.00167033	A0A024R4E5	More abundant in miR-142-KO		n.a.	+	-
	neg		Isocitrate dehydrogenase [NADP];Isocitrate dehydrogenase [NADP] cytoplasmic	HEL-S-26	+	0.349434	0.0066924	0.0102893	+	1.27719	4.01404e-07	0	V9HWJ2	More abundant in miR-142-KO	https://pubmed.ncbi.nlm.nih.gov/31221981/	o	-	-
	neg		Sorbitol dehydrogenase	HEL-S-95n	+	0.472421	1.37159e-06	0	+	0.629187	3.00907e-06	0	V9HW89	More abundant in miR-142-KO		n.a.	-	-
	neg		Hydroxymethylglutaryl-CoA synthase, cytoplasmic	HMGCS1	+	0.449004	0.000405987	0.0015098	+	2.18862	0.000566942	0.0029781	Q8N995	More abundant in miR-142-KO	https://pubmed.ncbi.nlm.nih.gov/32349352/	o	+	-
	neg		Heat shock factor-binding protein 1	HSBP1	-	1.24707	0.0388759	0.0507215	+	1.34647	0.0158946	0.0391383	O75506	More abundant in miR-142-KO	https://pubmed.ncbi.nlm.nih.gov/22804237/	o	+	-
	neg		Heat shock 70 kDa protein 1B;Heat shock 70 kDa protein 1A	HSPA1A	+	0.708685	1.18382e-07	0	+	0.877383	3.61093e-07	0	A8K5I0	More abundant in miR-142-KO	https://pubmed.ncbi.nlm.nih.gov/32374522/	o	+	-
	neg		Importin-9	IPO9	+	1.19478	0.000360654	0.00129231	+	0.716208	0.000379676	0.00237931	Q96P70	More abundant in miR-142-KO		n.a.	+	-
			LIM domain and actin-binding protein 1	LIMA1	+	2.01283	0.0220956	0.0303563	-	0.527138	0.0310621	0.0637291	F8VQE1	More abundant in miR-142-KO		n.a.	+	-
	neg		39S ribosomal protein L38, mitochondrial	MRPL38	+	0.570369	0.00145265	0.00312821	-	0.622673	0.0288786	0.0607413	Q96DV4	More abundant in miR-142-KO		n.a.	-	-
	neg		39S ribosomal protein L39, mitochondrial	MRPL39	+	0.166514	0.0331479	0.0430503	-	0.781911	0.0244294	0.0544609	Q9NYK5	More abundant in miR-142-KO		n.a.	-	-
	neg		39S ribosomal protein L44, mitochondrial	MRPL44	+	0.691904	0.00707264	0.0107368	+	0.764471	0.00884511	0.0243526	A0A024R473	More abundant in miR-142-KO		n.a.	+	-
	neg		28S ribosomal protein S25, mitochondrial	MRPS25	+	0.563088	0.0129206	0.0183144	-	0.876672	0.0392537	0.0761246	P82663	More abundant in miR-142-KO		n.a.	+	-
	neg		28S ribosomal protein S5, mitochondrial	MRPS5	+	0.291385	0.00978374	0.0147865	-	0.81738	0.0375812	0.0745479	P82675	More abundant in miR-142-KO		n.a.	+	-
	neg		NAD kinase 2, mitochondrial	NADK2	+	0.792666	9.69724e-05	0.000377953	+	0.777996	0.00209135	0.00773451	Q4G0N4	More abundant in miR-142-KO		n.a.	+	-
	neg		Gamma-soluble NSF attachment protein	NAPG	-	0.250978	0.0494138	0.0638106	+	0.695169	0.000881929	0.00407273	Q6FHY4	More abundant in miR-142-KO		n.a.	+	-
	neg		Cytochrome c oxidase subunit NDUFA4	NDUFA4	+	1.2147	0.00206755	0.00364368	-	1.34155	0.0376057	0.0744698	A0A024R9Z0	More abundant in miR-142-KO	https://pubmed.ncbi.nlm.nih.gov/33314701/	o	+	-
	neg		Nucleoplasmin-3	NPM3	+	1.00994	0.0202963	0.0285133	-	0.457438	0.0338495	0.0675517	O75607	More abundant in miR-142-KO		n.a.	-	-
	neg		Nuclear fragile X mental retardation-interacting protein 2	NUFIP2	+	0.496183	0.0123572	0.0177114	-	0.735851	0.0337414	0.0673921	Q7Z417	More abundant in miR-142-KO		n.a.	+	-
	neg		Oxysterol-binding protein-related protein 3	OSBPL3	+	1.02967	0.000990752	0.00231206	+	1.14161	1.95195e-06	0	Q9H4L5	More abundant in miR-142-KO	https://pubmed.ncbi.nlm.nih.gov/32709922/	o	+	-
	neg		Serine/threonine-protein kinase N2	PKN2	+	2.08168	0.000206918	0.000658228	+	1.78856	0.00068849	0.00354362	Q16513	More abundant in miR-142-KO	https://pubmed.ncbi.nlm.nih.gov/29368606/	s	+	-
	neg		Ras-related protein Rab-18	RAB18	+	2.00138	0.000115554	0.000451128	+	0.5411	0.000323275	0.00214815	Q9NP72	More abundant in miR-142-KO		n.a.	+	-
	neg		Ras-specific guanine nucleotide-releasing factor RalGPS2	RALGPS2	+	1.87353	3.10661e-06	0	+	0.706329	0.00768597	0.0222363	Q86X27	More abundant in miR-142-KO		n.a.	+	-
	neg		Ribosome maturation protein SBDS	SBDS	+	0.533023	2.76011e-05	0.000105263	+	0.94814	1.37278e-07	0	A0A0S2Z5I7	More abundant in miR-142-KO	https://pubmed.ncbi.nlm.nih.gov/31879230/	s	+	-
	neg		Protein transport protein Sec23A	SEC23A	+	0.466743	0.000107709	0.000458015	+	0.687355	0.0224189	0.0496948	F5H365	More abundant in miR-142-KO		n.a.	+	-
	neg		Endophilin-A2	SH3GL1	+	1.04553	2.06135e-06	0	+	1.43972	7.28601e-07	0	Q9UQD4	More abundant in miR-142-KO	https://pubmed.ncbi.nlm.nih.gov/27220321/	o	+	-
			Double-stranded RNA-binding protein Staufen homolog 1	STAU1	+	0.521432	0.000246036	0.000886228	+	1.51245	0.0163035	0.0398206	A8K622	More abundant in miR-142-KO	https://pubmed.ncbi.nlm.nih.gov/28004750/	s	+	-
	neg		Syntaxin-12	STX12	+	0.447066	0.000499874	0.00167568	+	0.721159	2.02561e-07	0	Q86Y82	More abundant in miR-142-KO		n.a.	+	-
	neg		Tubulin-specific chaperone C	TBCC	+	1.39381	1.3353e-05	0	+	1.28374	3.72789e-05	0	Q15814	More abundant in miR-142-KO	https://pubmed.ncbi.nlm.nih.gov/31278033/	s	+	-
			Transferin receptor	TFRC	+	1.82201	0.00130146	0.00287043	+	0.968452	0.00123076	0.00495833	A8K6Q8	More abundant in miR-142-KO	https://pubmed.ncbi.nlm.nih.gov/32064157/	o	+	-
	neg		Fructose-2,6-bisphosphatase TIGAR	TIGAR	+	1.53452	0.00422533	0.00698113	+	0.695675	3.79794e-06	0	Q9NQ88	More abundant in miR-142-KO		n.a.	-	-
	neg		Tubulin beta-4A chain	TUBB4A	+	1.79576	0.0124241	0.01778	+	0.511806	0.00117091	0.00482979	P04350	More abundant in miR-142-KO		n.a.	-	-
			Twinfilin-1	TWF1	+	0.776328	0.000298997	0.00121547	+	3.40523	1.93234e-06	0	Q12792	More abundant in miR-142-KO	https://elifesciences.org/articles/01964.pdf	o	+	-
	neg		Ubiquitin conjugation factor E4 A	UBE4A	+	0.62666	0.000199729	0.000670968	+	0.532488	0.000571133	0.00295652	Q14139	More abundant in miR-142-KO		n.a.	+	-
	neg		Uroporphyrinogen decarboxylase	UROD	+	1.26224	1.88532e-07	0	+	0.652345	0.0023511	0.0082383	P06132	More abundant in miR-142-KO		n.a.	+	-
	neg		Vesicle-associated membrane protein 2	VAMP2	+	1.85508	0.00907466	0.0137947	+	0.377563	0.0126819	0.0326161	J3QRU4	More abundant in miR-142-KO		n.a.	+	-
	neg		YTH domain-containing family protein 3	YTHDF3	+	1.16004	0.00732766	0.0111952	+	0.953996	0.00629179	0.0197531	Q8NA80	More abundant in miR-142-KO	https://pubmed.ncbi.nlm.nih.gov/32905518/	o	+	-
