# Supplementary material for: Changes of Protein Expression after CRISPR/Cas9 Knockout of miRNA-142 in Cell Lines Derived from Diffuse Large B-Cell Lymphoma
Source: Cancers (Basel). 2022 Oct 14;14(20):5031. doi: 10.3390/cancers14205031 (PMC9600116; doi:10.3390/cancers14205031)
Supplement: Supplementary file 1 [file cancers-14-05031-s001.zip › Supplementary Table S4.xlsx]

## Sheet: Tabelle1
ProbeName	Number Passed	GeneSymbol	Description	Sequence	EntrezGeneID	GeneName	RefSeqAccession	normalized expression SUDHL4 KO	normalized expression SUDHL4 WT	log2 normalized expression BJAB KO	log2 normalized expression BJAB WT	Fold change SUDHL4 KOvsWT	Fold change BJAB KOvsWT
A_19_P00315506	16	KIAA0040	Homo sapiens KIAA0040 (KIAA0040), transcript variant 1, mRNA [NM_001162893]	CAATGGATTCCATGTTTCTTTTTCTTGGGGGGAGCAGGGAGGGAGAAAGGTAGAAAAATG	9674	KIAA0040	NM_001162893	10.6478	9.99851	9.70844	9.33691	1.56838	1.29372
A_19_P00315668	10	HIPK2	Homo sapiens homeodomain interacting protein kinase 2 (HIPK2), transcript variant 1, mRNA [NM_022740]	AAAGGCAATACTAAAGGTATATATTTTTTTCAAAATGCTATTTTTTACTGCACTTGATAA	28996	homeodomain interacting protein kinase 2	NM_022740	1.60161	1.60006	4.96998	6.08424	1.00108	0.461926
A_19_P00315922	12	WDFY4	Homo sapiens WDFY family member 4 (WDFY4), mRNA [NM_020945]	GGAATCCCAGGATTCAACTACTGCTCTTCAGACGGCGCTGAGCCTCATCTCCATGACCTC	57705	WDFY family member 4	NM_020945	5.43336	5.53303	4.8697	4.24936	0.933251	1.53723
A_19_P00316225	14	FAM107A	Homo sapiens family with sequence similarity 107, member A (FAM107A), transcript variant 4, mRNA [NM_001282714]	TTTCCCTTCCTGAGAGAGGCAGGGTTCTGGGAGGTGAGGAGCTGCAGGGACCCAAGAAGG	11170	family with sequence similarity 107, member A	NM_001282714	4.22367	4.74306	5.56136	5.43974	0.697667	1.08795
A_19_P00316326	14	MAP3K13	Homo sapiens mitogen-activated protein kinase kinase kinase 13 (MAP3K13), transcript variant 3, mRNA [NM_001242317]	TGGACTTCATTTAAAGAAACCCACGGACCATTAATGGACAAAAACATGAGTCAATATGTA	9175	mitogen-activated protein kinase kinase kinase 13	NM_001242317	1.60788	1.60639	10.5712	9.25024	1.00103	2.49837
A_19_P00317360	1	ATP2C1	Homo sapiens ATPase, Ca++ transporting, type 2C, member 1 (ATP2C1), transcript variant 8, mRNA [NM_001199182]	GCTTTCCTCACTATGGATAGTCTGTTGCCTCCATCTAGATTCTCTTATTTCAAAAAATAT	27032	ATPase, Ca++ transporting, type 2C, member 1	NM_001199182	2.15978	4.67382	3.94456	4.32265	0.175065	0.769454
A_19_P00317444	16	LOC389602	Homo sapiens uncharacterized LOC389602 (LOC389602), mRNA [NM_001291913]	GACTAAGGAAAGGAGAAAATGGAAGAAGAACCCCCTCCTGCTTAGATGCAGTCATTTTTT	389602	uncharacterized LOC389602	NM_001291913	7.10985	7.32887	7.0922	6.68593	0.859146	1.32525
A_19_P00317449	16	ZNF678	Homo sapiens zinc finger protein 678 (ZNF678), transcript variant 1, mRNA [NM_178549]	ACCTGAAGTTCTGTTTGCTGTCATGTGGAAGAAAAGAGCCTTGGAGAAGTTTTATTTTTT	339500	zinc finger protein 678	NM_178549	8.26247	8.61435	9.23802	8.82393	0.78356	1.33246
A_19_P00319409	6	ERVMER34-1	Homo sapiens endogenous retrovirus group MER34, member 1 (ERVMER34-1), transcript variant 1, mRNA [NM_024534]	AAAGCAGGTCTTACCGAGAATTCAGCTGCCAAAACCCTCCTCTGAGTGTTCCTCTTATAA	100288413	endogenous retrovirus group MER34, member 1	NM_024534	3.70624	5.67848	3.51476	4.9202	0.254858	0.377501
A_19_P00319465	16	MAVS	Homo sapiens mitochondrial antiviral signaling protein (MAVS), transcript variant 1, mRNA [NM_020746]	GAGCCCAATGGCTAGAGGGCTCTGCTCCAAGTCATTGCTTACTACACCCACAAACATTCT	57506	mitochondrial antiviral signaling protein	NM_020746	9.61952	9.67549	10.1015	10.1272	0.961951	0.982382
A_19_P00319525	16	TSTD3	Homo sapiens thiosulfate sulfurtransferase (rhodanese)-like domain containing 3 (TSTD3), mRNA [NM_001195131]	AGTGTTTTCTTATTTAGCCGGAGTGAGAAGCAAGAAGGCCCTGGACACAGCAATATCTCT	100130890	thiosulfate sulfurtransferase (rhodanese)-like domain containing 3	NM_001195131	8.56248	8.50052	8.71156	8.60673	1.04388	1.07537
A_19_P00320158	16	SEC14L1	Homo sapiens SEC14-like 1 (S. cerevisiae) (SEC14L1), transcript variant 6, mRNA [NM_001204408]	TGAATGAATATCTGGTTTTGTCTCTGCTGGGCCTGTGTGCCTGGAAAGGAATTGTTTTGG	6397	SEC14-like 1 (S. cerevisiae)	NM_001204408	8.81559	8.93241	8.65819	8.87641	0.922214	0.859625
A_19_P00320721	16	MDM4	Homo sapiens MDM4, p53 regulator (MDM4), transcript variant 1, mRNA [NM_002393]	TATGAGGCTCTTGACCAGAAAAGAGTTCTTTCTCTAGGTGTTCTGAGAGAAGTTTGTAAA	4194	MDM4, p53 regulator	NM_002393	12.5856	12.9979	12.0592	12.2415	0.751427	0.881263
A_19_P00320972	1	STMN1	Homo sapiens stathmin 1 (STMN1), transcript variant 4, mRNA [NM_001145454]	AAGAAAAATCAAGGGGCTGTGTTCAAGAACTGGCTCCCTTGGTGATTGTATTACGAAGCC	3925	stathmin 1	NM_001145454	1.92662	3.95196	2.36252	3.09348	0.245648	0.602503
A_19_P00321202	13	CRYBG3	Homo sapiens beta-gamma crystallin domain containing 3 (CRYBG3), mRNA [NM_153605]	AATGAGCCCATGAGCACAAGTCAGAAAAAGGAAAATGTACTTTCATCAGAAGCAGTAAAG	131544	beta-gamma crystallin domain containing 3	NM_153605	2.70233	1.91531	5.30148	5.99616	1.7255	0.617847
A_19_P00321588	1	C14orf132	Homo sapiens chromosome 14 open reading frame 132 (C14orf132), transcript variant 1, mRNA [NM_001282463]	TTACATAGCTGTGCCTCAGAGAAAGGGTCCTGCATTTTCTGGAATGTTCTCTGTGCTTAC	56967	chromosome 14 open reading frame 132	NM_001282463	1.77069	1.76517	1.74442	1.78684	1.00384	0.971021
A_19_P00322236	13	ZNF124	Homo sapiens zinc finger protein 124 (ZNF124), transcript variant 2, mRNA [NM_001243740]	AATCCTGTGAGATTGGGATCCATCTAGTACTCTTCACCATTTGGAACAACTGCCTCCAGA	7678	zinc finger protein 124	NM_001243740	4.98299	3.61645	5.64048	5.52496	2.57853	1.08337
A_19_P00322299	16	ZSWIM6	Homo sapiens zinc finger, SWIM-type containing 6 (ZSWIM6), mRNA [NM_020928]	TAGAGACCAACTGCAAAAGTTTGTACAGTATTTGATCACAGTGCACCACACAGAAGTTTT	57688	zinc finger, SWIM-type containing 6	NM_020928	7.14098	7.33605	8.20718	8.53749	0.873532	0.795364
A_19_P00322495	16	TSTD3	Homo sapiens thiosulfate sulfurtransferase (rhodanese)-like domain containing 3 (TSTD3), mRNA [NM_001195131]	TTCATCAAAGGGGCTATGAGCTAGACCTGCAGATTAACACGCAGATGTGGCCTTAAAAAA	100130890	thiosulfate sulfurtransferase (rhodanese)-like domain containing 3	NM_001195131	7.09374	7.12853	6.57193	6.36132	0.976177	1.15718
A_19_P00322687	16	ERVMER34-1	Homo sapiens endogenous retrovirus group MER34, member 1 (ERVMER34-1), transcript variant 2, mRNA [NM_001242690]	AAAGCGCAGGTATGTTCCTAGTCTTGAGCGGGAGAAAATCACCCAGCTCGGAGCACCTGG	100288413	endogenous retrovirus group MER34, member 1	NM_001242690	9.77296	9.32959	7.82214	7.83943	1.35978	0.988083
A_19_P00322737	16	ZNF254	Homo sapiens zinc finger protein 254 (ZNF254), transcript variant 5, mRNA [NM_001278663]	TTTGGAGGGAAAGAAAGAGCCCTGGACTGTGAAGAGTGAGGAGACCATAGCTGCACAGCC	9534	zinc finger protein 254	NM_001278663	6.75311	6.84731	6.9178	6.87508	0.936788	1.03005
A_19_P00322797	16	SEC14L1	Homo sapiens SEC14-like 1 (S. cerevisiae) (SEC14L1), transcript variant 6, mRNA [NM_001204408]	TGAAAACATGCAGCAACCACTATTTTCTTCCTGCCCCTCGTTGATGAGAGCATTCGAAGT	6397	SEC14-like 1 (S. cerevisiae)	NM_001204408	8.49086	8.51858	8.59493	8.71539	0.980971	0.919894
A_19_P00322906	16	C17orf51	Homo sapiens chromosome 17 open reading frame 51 (C17orf51), mRNA [NM_001113434]	GAGGAGGCATCCAGGACAGCACCCACGTTCCCGCCTGAGGCACATGAGGGTGGATGACAG	339263	chromosome 17 open reading frame 51	NM_001113434	5.0526	5.57062	6.90077	6.62371	0.698326	1.21173
A_19_P00323413	1	PTPN14	Homo sapiens protein tyrosine phosphatase, non-receptor type 14 (PTPN14), mRNA [NM_005401]	CAGTTATGAGGTGTATAGAACTGACTTTGACAGTATTTTTTGCACTGTTTCCTATCTGTT	5784	protein tyrosine phosphatase, non-receptor type 14	NM_005401	1.86658	1.86243	1.85256	1.90844	1.00288	0.96201
A_19_P00324550	2	GALNT9	Homo sapiens polypeptide N-acetylgalactosaminyltransferase 9 (GALNT9), transcript variant A, mRNA [NM_001122636]	ATCAAGTACAGCACGTTTGAGGTGCAGCAGTATGCGAACGCCGCCCATGGCTACAACTGG	50614	polypeptide N-acetylgalactosaminyltransferase 9	NM_001122636	2.22977	3.81239	3.19336	2.05772	0.333874	2.19715
A_19_P00326732	16	SMIM13	Homo sapiens small integral membrane protein 13 (SMIM13), mRNA [NM_001135575]	GGTCTGCTATGATGCATTGCCATCTTGCTGCTTGACAATAGGTTTATAAATAATTAGAAT	221710	small integral membrane protein 13	NM_001135575	9.33954	8.99982	9.72134	9.78943	1.26552	0.953905
A_19_P00800114	16	HIGD1A	Homo sapiens HIG1 hypoxia inducible domain family, member 1A (HIGD1A), transcript variant 1, mRNA [NM_001099668]	GGTGACCAAATTACTAGTGACTAGTTCACTAACTAGGTCATTCAGGGAAGTCAAGTTAAC	25994	HIG1 hypoxia inducible domain family, member 1A	NM_001099668	9.6405	8.95217	8.77377	8.60807	1.61142	1.12171
A_19_P00800467	16	CLEC2D	Homo sapiens C-type lectin domain family 2, member D (CLEC2D), transcript variant 2, mRNA [NM_001004419]	AGCAAAAATGCAAGCAAGTATAGAAAAAGTGGTTCCCTTCCCAAAGTGGAAGCCAAGTTC	29121	C-type lectin domain family 2, member D	NM_001004419	14.2524	14.1001	14.2009	14.3252	1.11131	0.917416
A_19_P00800549	16	PMF1	Homo sapiens polyamine-modulated factor 1 (PMF1), transcript variant 1, mRNA [NM_001199654]	CCCAGGGGCCTTTACCATGTTCTCCCCACATCCGTAAATAAACTTCCTCCGCTACACTGT	11243	polyamine-modulated factor 1	NM_001199654	12.7261	13.0065	13.2554	13.5347	0.82333	0.824022
A_19_P00802141	16	IPO7	Homo sapiens importin 7 (IPO7), mRNA [NM_006391]	TTGCTGCTAAAAATGACAGCTCCCTCTGTGTCCTCTTTTCTTAAAGCTGTCAGTGTACAA	10527	importin 7	NM_006391	12.5868	12.4123	11.7976	12.3943	1.12857	0.66129
A_19_P00802154	6	DST	Homo sapiens dystonin (DST), transcript variant 2, mRNA [NM_001144769]	AGGAAACGAAGAATCAAGAAGAGCAGCCGAGTCCAGCCAGAATTTTATCACTCTGTTCAA	667	dystonin	NM_001144769	4.52062	4.21688	4.26794	5.5879	1.23434	0.400545
A_19_P00802413	16	PIEZO1	Homo sapiens piezo-type mechanosensitive ion channel component 1 (PIEZO1), mRNA [NM_001142864]	ACCTGCTCTTCCTGCTGCTGCTGCCCTGGTTCCCCGGCCCCACCCGATGCGGCCTCCAAG	9780	piezo-type mechanosensitive ion channel component 1	NM_001142864	16.9572	16.9124	15.7467	15.6614	1.0316	1.06095
A_19_P00802546	16	FAM199X	Homo sapiens family with sequence similarity 199, X-linked (FAM199X), mRNA [NM_207318]	CTTTAGTGTTATTAAATATTTTCATTTATTAGTCAAAGGTAAGTTAATTAAGCTTGTTTA	139231	family with sequence similarity 199, X-linked	NM_207318	7.76158	7.86535	8.30996	7.76158	0.930601	1.46244
A_19_P00802936	16	BRK1	Homo sapiens BRICK1, SCAR/WAVE actin-nucleating complex subunit (BRK1), mRNA [NM_018462]	GACATTTTCAGACTTTTCTTTCTGTCACTTGGAGTGTCTATGCCTCTCATGTTTCCCTAA	55845	BRICK1, SCAR/WAVE actin-nucleating complex subunit	NM_018462	15.2274	14.8375	15.5614	15.7568	1.31037	0.873318
A_19_P00803685	16	ANKRD33B	Homo sapiens ankyrin repeat domain 33B (ANKRD33B), mRNA [NM_001164440]	ATATTTTCCTATTCAGACCTCAGGGCTATTTTGGGACCTACAAATAAATGGGATTCCCAG	651746	ankyrin repeat domain 33B	NM_001164440	8.10666	9.40696	13.106	12.1746	0.406042	1.90711
A_19_P00803864	2	FAM105A	Homo sapiens family with sequence similarity 105, member A (FAM105A), mRNA [NM_019018]	CTGGTGAAAATGGTGTTTGTTGTAACATCTTGGTATCATTGTGGGTAAGTAGAACAAATA	54491	family with sequence similarity 105, member A	NM_019018	2.16265	2.11426	2.03217	2.31067	1.03411	0.824447
A_19_P00804020	1	TLE1	Homo sapiens transducin-like enhancer of split 1 (E(sp1) homolog, Drosophila) (TLE1), transcript variant 3, mRNA [NM_001303104]	GTGACCATGGCAGAGTTGAATGCCATCATCGGGCAGCAGCAGTTGCAAGCTCAGCATCTT	7088	transducin-like enhancer of split 1 (E(sp1) homolog, Drosophila)	NM_001303104	3.21666	1.86193	3.06333	2.95849	2.55749	1.07538
A_19_P00804072	14	RNF213	Homo sapiens ring finger protein 213 (RNF213), transcript variant 3, mRNA [NM_001256071]	GTCAAAGAGAGCCTGGGACTGAACGGTGACTTCAGTGTTCTCAACACTTTACTAAATTTT	57674	ring finger protein 213	NM_001256071	3.17795	6.02643	5.95059	5.97678	0.138842	0.982014
A_19_P00804093	13	CCDC149	Homo sapiens coiled-coil domain containing 149 (CCDC149), transcript variant 1, mRNA [NM_173463]	CCCCACTGCTGAAGTTTGTCGAGCAGCCCACTGAGAACAAAGCAGATCCCAAGGATGGTA	91050	coiled-coil domain containing 149	NM_173463	2.00641	4.51311	5.81527	7.06618	0.175959	0.420182
A_19_P00804212	16	NFU1	Homo sapiens NFU1 iron-sulfur cluster scaffold (NFU1), transcript variant 1, mRNA [NM_015700]	TGAAAAATGGAATTCAGAACATGCTGCAGTTTATATTCCAGAGGTAGAAGGTGTAGAACA	27247	NFU1 iron-sulfur cluster scaffold	NM_015700	10.3941	10.0127	9.6788	9.95855	1.30261	0.823731
A_19_P00804723	12	RPS24	Homo sapiens ribosomal protein S24 (RPS24), transcript variant d, mRNA [NM_001142285]	ACAGACCTTGGAGGATCTTCTGGTTGCCTCTTCAAGAATTCATTCTATTCCCCTTCTGCT	6229	ribosomal protein S24	NM_001142285	5.31485	5.586	3.67646	4.47603	0.828659	0.574522
A_19_P00805273	16	PSMD14	Homo sapiens proteasome (prosome, macropain) 26S subunit, non-ATPase, 14 (PSMD14), mRNA [NM_005805]	TGCAGTGGAAACAGCAGAAAAAGTCTATATTTCTTCCCTGGCACTGTTAAAAATGTTAAA	10213	proteasome (prosome, macropain) 26S subunit, non-ATPase, 14	NM_005805	7.5614	8.06938	8.48098	8.03915	0.703206	1.35833
A_19_P00805548	16	BMPR1A	Homo sapiens bone morphogenetic protein receptor, type IA (BMPR1A), mRNA [NM_004329]	CAGGCAGAAATATTTAGTATCTAGTCAGTATCTGTAGCTACACTGTATAACTGTTCTTCA	657	bone morphogenetic protein receptor, type IA	NM_004329	8.5395	9.07408	8.79796	8.74165	0.690358	1.03981
A_19_P00806320	16	ARPC2	Homo sapiens actin related protein 2/3 complex, subunit 2, 34kDa (ARPC2), transcript variant 1, mRNA [NM_152862]	ATTCCACTTGATCAACTTAATTCCTTTTCTTTATCTTCCTTCCGTCACTTCCCTTTTCTC	10109	actin related protein 2/3 complex, subunit 2, 34kDa	NM_152862	12.1472	12.1472	11.077	11.2313	1	0.898594
A_19_P00807336	16	PPA1	Homo sapiens pyrophosphatase (inorganic) 1 (PPA1), mRNA [NM_021129]	TAATGATATCAATGATGTCAAACAGCTGAAACCTGGCTACTTAGAAGCTACTGTGGACTG	5464	pyrophosphatase (inorganic) 1	NM_021129	13.7661	13.5734	13.3457	13.1981	1.14287	1.10774
A_19_P00807411	12	RNF180	Homo sapiens ring finger protein 180 (RNF180), transcript variant 1, mRNA [NM_001113561]	CCTTGGAATCTTGCTCCTAAGTTAGCTCTGTGGCATAACAAAATTCCAGTTAATAAAATT	285671	ring finger protein 180	NM_001113561	1.6166	1.71206	8.04052	8.59493	0.935975	0.680934
A_19_P00808033	15	STRN	Homo sapiens striatin, calmodulin binding protein (STRN), mRNA [NM_003162]	GCATAAAGATTCATAATGGCAAAACGAAGCATGTCCCATCATACCCCTTCATTCCTACCT	6801	striatin, calmodulin binding protein	NM_003162	3.97655	4.94207	6.13799	5.11346	0.512094	2.0343
A_19_P00808120	16	FAM200B	Homo sapiens family with sequence similarity 200, member B (FAM200B), mRNA [NM_001145191]	TTTCAACTTCTGCCTTTCTGTGTACTCCCTTATCCCACTGGGTGATATTATTTGGCATGG	285550	family with sequence similarity 200, member B	NM_001145191	8.25883	7.97954	6.42587	5.07805	1.2136	2.54527
A_19_P00808208	16	CDCA7L	Homo sapiens cell division cycle associated 7-like (CDCA7L), transcript variant 2, mRNA [NM_001127370]	CAAGTTTGCCTTAGCACGAGTGACCACAGTTTAATAGACCACACACATCATTTAACCTGC	55536	cell division cycle associated 7-like	NM_001127370	9.61752	9.48194	9.17079	9.61395	1.09853	0.735522
A_19_P00808453	16	COX5A	Homo sapiens cytochrome c oxidase subunit Va (COX5A), mRNA [NM_004255]	TACCTTATTTGAACAAGTTTTCCTTTATTGAGTACCAAGCCATGTAATGGTAACTTGGAC	9377	cytochrome c oxidase subunit Va	NM_004255	15.3154	15.0581	15.0883	15.2865	1.1952	0.871617
A_19_P00808461	16	ZNF37A	Homo sapiens zinc finger protein 37A (ZNF37A), transcript variant 1, mRNA [NM_001007094]	GTGGGAAAACCTTCCATCAGAAGTTGGCCCTAATTGTTCACCAGAGAACTCATATAAGAC	7587	zinc finger protein 37A	NM_001007094	9.13827	9.03755	9.00826	8.86206	1.07231	1.10665
A_19_P00808668	16	WDR82	Homo sapiens WD repeat domain 82 (WDR82), mRNA [NM_025222]	GTTAAATGTTCCCCTACACATTTCTGTGCATAGATTTTTGGTGTGTTTACATAGTCGTTA	80335	WD repeat domain 82	NM_025222	11.0809	11.3994	11.3137	11.4342	0.801925	0.919894
A_19_P00809029	1	GGACT	Homo sapiens gamma-glutamylamine cyclotransferase (GGACT), transcript variant 2, mRNA [NM_001195087]	TTTCTGGTCACCCTGTGAAGTGGACTTAACTTTTTCTTGAATCATGTGGAAGGATTCTGA	87769	gamma-glutamylamine cyclotransferase	NM_001195087	1.93773	2.83496	1.91559	3.04646	0.536914	0.45664
A_19_P00809382	6	SETD1B	Homo sapiens SET domain containing 1B (SETD1B), mRNA [NM_015048]	ATCATGAAGCGTGACCTGAACCGCAAGATGGTGGAAGTGGTGGCTTTCCGGGCCTTTGAC	23067	SET domain containing 1B	NM_015048	2.90942	4.0101	3.41675	4.67706	0.466296	0.417454
A_19_P00809558	16	SSB	Homo sapiens Sjogren syndrome antigen B (autoantigen La) (SSB), transcript variant 2, mRNA [NM_001294145]	CTTTTAAAAGGAAAACTGAATTAGGTCCACTTCAATGTCCACCTGTGAGAAAGGAAAAAT	6741	Sjogren syndrome antigen B (autoantigen La)	NM_001294145	13.153	12.8387	13.345	13.0889	1.24347	1.19425
A_19_P00810045	16	MLX	Homo sapiens MLX, MAX dimerization protein (MLX), transcript variant 3, mRNA [NM_170607]	AAAGATCATGAAAGGGAACTATAAGCAGATTGTGAAGGCACACCAGGACAACCCCCATGA	6945	MLX, MAX dimerization protein	NM_170607	7.70197	7.60963	7.74228	8.7383	1.0661	0.501383
A_19_P00810523	16	NDUFAF2	Homo sapiens NADH dehydrogenase (ubiquinone) complex I, assembly factor 2 (NDUFAF2), mRNA [NM_174889]	TTATGAAAAAGAAAAACTCCTTAGTAAAGAGACCAGTGAGGAACTCCTGCCTCCACCAGT	91942	NADH dehydrogenase (ubiquinone) complex I, assembly factor 2	NM_174889	11.6355	11.1081	10.8471	10.5452	1.44135	1.23273
A_19_P00811284	16	NASP	Homo sapiens nuclear autoantigenic sperm protein (histone-binding) (NASP), transcript variant 2, mRNA [NM_002482]	TTATTGGCTGAATCTGCCTTGGAGCACTCCTGGTTTTATATAGTAGCCAAAGGTTTTGTT	4678	nuclear autoantigenic sperm protein (histone-binding)	NM_002482	8.26574	7.77955	7.63917	6.80175	1.40074	1.78686
A_19_P00811706	10	LPP	Homo sapiens LIM domain containing preferred translocation partner in lipoma (LPP), transcript variant 1, mRNA [NM_005578]	AAACTCATTATTTCTAGTTAGTTCATCTGTGGAAAAGGATATCGTTCTTGAGGAGAGGGG	4026	LIM domain containing preferred translocation partner in lipoma	NM_005578	5.22368	3.19719	5.15693	4.98954	4.07411	1.12303
A_19_P00811812	15	MPRIP	Homo sapiens myosin phosphatase Rho interacting protein (MPRIP), transcript variant 2, mRNA [NM_201274]	TCAAAATTCGTTATCAAAGGCAAAACCTACTGTGCCAAGCTGGGGCGCTATATGTGAACG	23164	myosin phosphatase Rho interacting protein	NM_201274	7.40593	7.27795	5.93116	6.89224	1.09276	0.513672
A_19_P00811843	16	ARHGAP32	Homo sapiens Rho GTPase activating protein 32 (ARHGAP32), transcript variant 1, mRNA [NM_001142685]	ATCCATCAACACTCCTGCTGTCGGTGCTGCCCATGTTATCAAGAGGTACACTGCTCGGGC	9743	Rho GTPase activating protein 32	NM_001142685	5.60334	5.53247	8.46638	8.57175	1.05035	0.929566
A_19_P00812250	16	SMAD4	Homo sapiens SMAD family member 4 (SMAD4), mRNA [NM_005359]	GGTCAGTTGAAAGTCCCAGGAGTTCCTTTGTGGCTTTCTGTATACTTTTGCCTGGTTAAA	4089	SMAD family member 4	NM_005359	12.2284	12.3072	12.1479	12.0341	0.946825	1.08208
A_19_P00812340	16	FTL	Homo sapiens ferritin, light polypeptide (FTL), mRNA [NM_000146]	TCACTTCCTAGATGAGGAAGTTAAACTCATCAAGAAGATGGGTGACCACCTGACCAACCT	2512	ferritin, light polypeptide	NM_000146	13.701	14.0376	13.7476	14.1109	0.791882	0.777378
A_19_P00812349	16	ZNF805	Homo sapiens zinc finger protein 805 (ZNF805), transcript variant 1, mRNA [NM_001023563]	AGAAATAAGCCATAGCTTTGAGATGAAGGCTTATATACGTGTAAACCATTGTAACCAAGA	390980	zinc finger protein 805	NM_001023563	5.83838	7.09294	7.32954	7.12032	0.419122	1.15607
A_19_P00812587	16	RPL5	Homo sapiens ribosomal protein L5 (RPL5), mRNA [NM_000969]	TATGGTGTGAATGTTGGCCTGACAAATTATGCTGCAGCATATTGTACTGGCCTGCTGCTA	6125	ribosomal protein L5	NM_000969	15.8699	15.9636	15.6971	15.6172	0.937091	1.05694
A_19_P00813077	16	FAM228B	Homo sapiens family with sequence similarity 228, member B (FAM228B), transcript variant 1, mRNA [NM_001145710]	TTCAGCTGCATTCCAGATTCCCACAAATTTCTAATTCAAGGCACTTTATAACTCCAAACG	375190	family with sequence similarity 228, member B	NM_001145710	7.56927	7.36778	7.04359	7.85936	1.14988	0.568106
A_19_P00813347	16	KPNA4	Homo sapiens karyopherin alpha 4 (importin alpha 3) (KPNA4), mRNA [NM_002268]	ATATTTACTCCTTCAAGAAGTCAGGAGTATATCCAGGCCTACCTATCATCCTTGCCATCC	3840	karyopherin alpha 4 (importin alpha 3)	NM_002268	9.45194	9.34322	7.84372	7.57143	1.07827	1.20772
A_21_P0000002	4	ACBD7	Homo sapiens acyl-CoA binding domain containing 7 (ACBD7), mRNA [NM_001039844]	ATGGTATGACCAGAGGAATAGATCCACTTCATGTTACTACAACAACAAAACTATCTAGGT	414149	acyl-CoA binding domain containing 7	NM_001039844	4.63365	6.0657	1.70842	1.70746	0.370604	1.00066
A_21_P0000004	16	SYS1	Homo sapiens Sys1 golgi trafficking protein (SYS1), transcript variant 2, mRNA [NM_001099791]	TTCTTAATACTGTCATGTGACTTATGAGGAAACGGTTTGAACTTGTCTCGGAGGCATGGT	90196	Sys1 golgi trafficking protein	NM_001099791	7.61731	8.13369	9.26327	8.32512	0.699126	1.91606
A_21_P0000007	9	SRRM5	Homo sapiens serine/arginine repetitive matrix 5 (SRRM5), mRNA [NM_001145641]	GGGAAAGGAAAGACCTGTGATGATTCAATAAATTTTTACATAGCACCCATCCCCAAAAAA	100170229	serine/arginine repetitive matrix 5	NM_001145641	4.60007	2.57678	4.69321	3.66198	4.06509	2.04376
A_21_P0000010	9	FKBP5	Homo sapiens FK506 binding protein 5 (FKBP5), transcript variant 4, mRNA [NM_001145777]	CACTTGCCAGAATGTAATATTTGCTGTGAAGTGCTGAAAAGAAAAGTAACTTCCTTTTCA	2289	FK506 binding protein 5	NM_001145777	3.12385	6.03727	3.1884	3.5982	0.132731	0.752724
A_21_P0000011	16	AMDHD2	Homo sapiens amidohydrolase domain containing 2 (AMDHD2), transcript variant 2, mRNA [NM_001145815]	AATGTCTCCAGGTCCAAAGAGATAGGATGGTCTGGGCCCCACCTGTTGGAAGGGAACAGC	51005	amidohydrolase domain containing 2	NM_001145815	5.41633	4.96201	6.67237	6.61143	1.37014	1.04315
A_21_P0000013	16	TIMM8A	Homo sapiens translocase of inner mitochondrial membrane 8 homolog A (yeast) (TIMM8A), transcript variant 2, mRNA [NM_001145951]	AAATGAGTGGCTCCAGCCCAGTAACTATAAAAGTGGTGTAATCTCTTCCAACGTAAAAAA	1678	translocase of inner mitochondrial membrane 8 homolog A (yeast)	NM_001145951	10.859	10.8398	10.5744	10.757	1.01346	0.881134
A_21_P0000014	8	FAN1	Homo sapiens FANCD2/FANCI-associated nuclease 1 (FAN1), transcript variant 4, mRNA [NM_001146096]	CCTTATATGTAACATTTTATAAGCAAGTAAACATTAAATTTAGCCACCCTCTGGCTGGGA	22909	FANCD2/FANCI-associated nuclease 1	NM_001146096	1.83722	1.80281	4.39266	5.4852	1.02413	0.468934
A_21_P0000015	15	PARP9	Homo sapiens poly (ADP-ribose) polymerase family, member 9 (PARP9), transcript variant 6, mRNA [NM_001146106]	TTTCCCACCAGCTGGAAGAAAGAACTTTCATTTGTCTTGAAATGAGAAAAATGTTCTTAG	83666	poly (ADP-ribose) polymerase family, member 9	NM_001146106	7.98886	8.61835	7.34525	7.82185	0.646404	0.718668
A_21_P0000017	15	RPS20	Homo sapiens ribosomal protein S20 (RPS20), transcript variant 1, mRNA [NM_001146227]	GTACACTTTGAGAAGTGTATTCGAATCCCCGGGGACATGTCCTTTTTAACTGCATTCTCC	6224	ribosomal protein S20	NM_001146227	6.86208	6.1829	5.80288	3.62596	1.60122	4.5219
A_21_P0000018	1	SHBG	Homo sapiens sex hormone-binding globulin (SHBG), transcript variant 4, mRNA [NM_001146281]	TGATGTAGAATCAAATCCCGGGATATTTCTCCCTCCAGGGACTCAGGCAGAATTCAATCT	6462	sex hormone-binding globulin	NM_001146281	1.70471	1.96764	2.94097	3.40469	0.833391	0.725113
A_21_P0000019	16	KDM4C	Homo sapiens lysine (K)-specific demethylase 4C (KDM4C), transcript variant 3, mRNA [NM_001146695]	GCATTCAAGATGCAACACCTACAATATGGTGAATTAAAGATGCCATTTGCATGGATAAAA	23081	lysine (K)-specific demethylase 4C	NM_001146695	7.33596	7.28119	5.61021	6.46078	1.03869	0.554568
A_21_P0000020	16	RBM19	Homo sapiens RNA binding motif protein 19 (RBM19), transcript variant 1, mRNA [NM_001146699]	GTTAGAGCTTTTCCACCCACTTCTCTTCCACTGAGCTTCACTAATAATATGTAATCATTT	9904	RNA binding motif protein 19	NM_001146699	9.50414	9.66288	9.09244	8.63176	0.895805	1.37619
A_21_P0000021	16	ADAL	Homo sapiens adenosine deaminase-like (ADAL), transcript variant 1, mRNA [NM_001159280]	GAAGTTAAGGCTGATGACACCCCTAATTTAAATTACTAAGGATTTCTGATAGGTTTTCTG	161823	adenosine deaminase-like	NM_001159280	5.46731	4.98185	5.84355	5.86149	1.40003	0.987641
A_21_P0000022	11	BRI3	Homo sapiens brain protein I3 (BRI3), transcript variant 2, mRNA [NM_001159491]	TGTGGCTGTGATAAGGGCAGGCAAAGCGTCTTAGCACTCTACAGCTCTGGCGTGGTTGGA	25798	brain protein I3	NM_001159491	2.64499	4.85755	5.24355	4.28611	0.215752	1.94186
A_21_P0000023	16	RIOK2	Homo sapiens RIO kinase 2 (RIOK2), transcript variant 2, mRNA [NM_001159749]	GCAGGTCTCTGGATACATTGATCAGGTTTTAGATGGATGAGTTATTCCTCATATATTTTC	55781	RIO kinase 2	NM_001159749	5.81671	5.89276	5.84792	8.09706	0.948649	0.210349
A_21_P0000025	8	NOS3	Homo sapiens nitric oxide synthase 3 (endothelial cell) (NOS3), transcript variant 2, mRNA [NM_001160109]	AGTATGACGTGGTGTCCCTCGAACACGAGACGCTGGTGCTGGTGGTAACCAGCACATTTG	4846	nitric oxide synthase 3 (endothelial cell)	NM_001160109	3.8524	4.27395	4.30049	4.48553	0.74662	0.879622
A_21_P0000026	16	C15orf40	Homo sapiens chromosome 15 open reading frame 40 (C15orf40), transcript variant 4, mRNA [NM_001160115]	AGCTCTGTCGGTATCTTTCCAAGGTCCTAGAACTCAGGAAGAGTGATGTGGTTTTGGATA	123207	chromosome 15 open reading frame 40	NM_001160115	9.91136	9.93928	10.6772	10.5577	0.980835	1.08634
A_21_P0000028	1	SH2D2A	Homo sapiens SH2 domain containing 2A (SH2D2A), transcript variant 5, mRNA [NM_001161444]	TGGCACACTTCTCAAGAAATGTGGATGGAATAAACCATAGGTGTTCAAAGCTGGAAAAAA	9047	SH2 domain containing 2A	NM_001161444	2.47508	2.55517	2.17242	2.50092	0.945996	0.796363
A_21_P0000029	16	COG5	Homo sapiens component of oligomeric golgi complex 5 (COG5), transcript variant 3, mRNA [NM_001161520]	CATAAAATAGGGCAAATTGAGGATAGTGTAACTACTGCTGCTGAATAAATGGGAAATAGT	10466	component of oligomeric golgi complex 5	NM_001161520	8.62484	8.87377	6.62783	6.18316	0.841517	1.36101
A_21_P0000030	11	RBM34	Homo sapiens RNA binding motif protein 34 (RBM34), transcript variant 2, mRNA [NM_001161533]	TAGGTTCAAATTTAACCCAAGAAAAGAGTTGCTCTTACTATCTACTGCTGACTCTTGAAC	23029	RNA binding motif protein 34	NM_001161533	2.76397	4.39346	5.07193	4.65466	0.323201	1.33541
A_21_P0000033	16	ANKRD66	Homo sapiens ankyrin repeat domain 66 (ANKRD66), mRNA [NM_001162435]	CAGTCAGCATCTTTTGACCCCTGCCCCCCAACAATAATAGAATTTCAGGAGACAAGGAAA	100287718	ankyrin repeat domain 66	NM_001162435	11.0037	10.9798	10.7866	10.9478	1.01665	0.894248
A_21_P0000034	16	COX11	Homo sapiens COX11 cytochrome c oxidase copper chaperone (COX11), transcript variant 1, mRNA [NM_004375]	TGTGGTAGTGAGCTGATCATCCACTTTCTTCTAAAATAAAGAGAAGAAAATGGCCAGTAA	1353	COX11 cytochrome c oxidase copper chaperone	NM_004375	10.3971	9.98199	9.5724	8.93137	1.33338	1.55945
A_21_P0000035	16	TMEM217	Homo sapiens transmembrane protein 217 (TMEM217), transcript variant 2, mRNA [NM_001162900]	TTTATACCAGATTTTTGCAGCACAAAGGATACTGTTGGCCCTGGGGTGGGTTTGTGCTAT	221468	transmembrane protein 217	NM_001162900	5.20147	4.85461	6.38809	5.64242	1.27179	1.67675
A_21_P0000036	11	RDM1	Homo sapiens RAD52 motif containing 1 (RDM1), transcript variant 1, mRNA [NM_145654]	GAACTTGACTAGCATTTCTGAATATCCCAAGGCGAGGTCATGTAACTTCCTTGGGAAGCT	201299	RAD52 motif containing 1	NM_145654	3.90228	4.56668	5.33405	4.35065	0.63095	1.97712
A_21_P0000037	13	ZSCAN12	Homo sapiens zinc finger and SCAN domain containing 12 (ZSCAN12), transcript variant 1, mRNA [NM_001163391]	ACCAAAACTGGTTGACTCTAACCTTGCCTTGCTGAGTAAAAATTCTGCTTTGGATGAGAA	9753	zinc finger and SCAN domain containing 12	NM_001163391	3.39385	3.92114	8.4621	8.2518	0.69386	1.15693
A_21_P0000039	16	DDHD2	Homo sapiens DDHD domain containing 2 (DDHD2), transcript variant 3, mRNA [NM_001164234]	CAGCAGGACCTGATTATGCACTGCTATCTAGGTAGGGTCACTTATGGTTTTATAATATAT	23259	DDHD domain containing 2	NM_001164234	7.57395	7.68908	6.21013	7.04709	0.923303	0.559823
A_21_P0000040	16	ZBTB24	Homo sapiens zinc finger and BTB domain containing 24 (ZBTB24), transcript variant 2, mRNA [NM_001164313]	CAGGTAATGATGTTTTCAAAGCTGATTGCAGTGTGTTGCAGAATTGGGAGTAGTGATGAT	9841	zinc finger and BTB domain containing 24	NM_001164313	7.32441	7.49312	8.31321	9.6378	0.889639	0.399262
A_21_P0000041	8	RAPGEF6	Homo sapiens Rap guanine nucleotide exchange factor (GEF) 6 (RAPGEF6), transcript variant 6, mRNA [NM_001164390]	GTATGTACTTTGGCAAAAGAAGCCATGGTTTTCACAGTTCTTTTTCTAAGTAGTTTTCCT	51735	Rap guanine nucleotide exchange factor (GEF) 6	NM_001164390	1.65818	3.16629	3.97655	3.22404	0.351571	1.68472
A_21_P0000050	1	DISC1	Homo sapiens disrupted in schizophrenia 1 (DISC1), transcript variant l, mRNA [NM_001164549]	AGCTATTGAGAGAGGGACACCCAATGGCAAAGTTCCCATCTGGAAGAATGGATTGTTACT	27185	disrupted in schizophrenia 1	NM_001164549	1.97221	2.57923	1.92794	1.96104	0.656553	0.977321
A_21_P0000051	15	DISC1	Homo sapiens disrupted in schizophrenia 1 (DISC1), transcript variant n, mRNA [NM_001164551]	TTAGTAATATATAGAGAGCAGTTGCTGCTTCTAATCCAGTGGCTTGTGGTCCTGGCTGCA	27185	disrupted in schizophrenia 1	NM_001164551	4.16386	4.6749	5.32433	5.02477	0.701716	1.23077
A_21_P0000052	2	DISC1	Homo sapiens disrupted in schizophrenia 1 (DISC1), transcript variant q, mRNA [NM_001164554]	GTGAATTTGAGAAATGTCAGACTGTGCCAAAGGGGGTCACATGCATCAAATTTCCACATA	27185	disrupted in schizophrenia 1	NM_001164554	5.42372	4.74663	1.99864	3.85126	1.59891	0.276889
A_21_P0000053	16	C16orf52	Homo sapiens chromosome 16 open reading frame 52 (C16orf52), mRNA [NM_001164579]	ACAGGACTTTTAGTTGTATCACCTCAAGAGATTTTGAAGTTTGTGATCAAGGTCTGTATA	730094	chromosome 16 open reading frame 52	NM_001164579	7.58599	7.19441	8.96216	8.52218	1.31183	1.35659
A_21_P0000054	16	PET117	Homo sapiens PET117 homolog (S. cerevisiae) (PET117), mRNA [NM_001164811]	CCTGTGTGAAGGTTTGTTTTTCCAACCTGTGAAAGAAACGTGAATGTAAAAGAGACCTAA	100303755	PET117 homolog (S. cerevisiae)	NM_001164811	11.7435	11.6941	11.0495	11.601	1.03478	0.682326
A_21_P0000055	16	LYRM4	Homo sapiens LYR motif containing 4 (LYRM4), transcript variant 2, mRNA [NM_001164840]	GTCTTTGAATTTTGTGTCATGCTGAATTCCCACTCCAAGACAATAAAAATTCTCTTGCAT	57128	LYR motif containing 4	NM_001164840	11.4573	11.3915	9.03955	9.14688	1.04669	0.928304
A_21_P0000056	16	TMEM41B	Homo sapiens transmembrane protein 41B (TMEM41B), transcript variant 2, mRNA [NM_001165030]	GCTCTAGGAAAAGTTTTATCCAAATACAAGGACACCTTTTATGTTCAAGTACTTGTAGCT	440026	transmembrane protein 41B	NM_001165030	8.22877	8.90436	7.55929	8.67216	0.626075	0.462373
A_21_P0000057	12	RGS9	Homo sapiens regulator of G-protein signaling 9 (RGS9), transcript variant 3, mRNA [NM_001165933]	CGATCTATAAGGACATGCTGGCCAAAGCTATTGAACCTCAGGAAACCACCAAGAAAAGCT	8787	regulator of G-protein signaling 9	NM_001165933	7.73822	8.39268	7.12941	3.26158	0.635314	14.5992
A_21_P0000059	1	APOBEC3H	Homo sapiens apolipoprotein B mRNA editing enzyme, catalytic polypeptide-like 3H (APOBEC3H), transcript variant SV-154, mRNA [NM_001166004]	TTTGCTTTATTAACGAGATCAAGTCCATGGGACTGGACGAAACGCAGTGCTACCAAGTCA	164668	apolipoprotein B mRNA editing enzyme, catalytic polypeptide-like 3H	NM_001166004	1.86177	4.30398	1.84757	1.90371	0.184001	0.961836
A_21_P0000061	16	CGREF1	Homo sapiens cell growth regulator with EF-hand domain 1 (CGREF1), transcript variant 5, mRNA [NM_001301324]	TTTTCCCCTCCTGCTGCCATACTCACCCTGGGAGAGGCTGAAGATGACGGAGGCATTGAA	10669	cell growth regulator with EF-hand domain 1	NM_001301324	7.54967	7.22909	8.09592	8.17104	1.24883	0.949266
A_21_P0000062	3	C22orf39	Homo sapiens chromosome 22 open reading frame 39 (C22orf39), transcript variant 2, mRNA [NM_001166242]	ATTAGTTCTTCTGTCAGTCGATCACGAGGTGCCGTTTTCTTCATTTTTCATTGGCTGGCG	128977	chromosome 22 open reading frame 39	NM_001166242	3.90583	1.75734	2.98157	1.72584	4.43365	2.38789
A_21_P0000063	1	MDFIC	Homo sapiens MyoD family inhibitor domain containing (MDFIC), transcript variant 2, mRNA [NM_001166346]	GTGACCAGTAGCTTTGGAATGGCTTATGCTTGTTTTCAATAACTGGTTTGTTTTGAAATA	29969	MyoD family inhibitor domain containing	NM_001166346	1.88563	1.88977	1.84061	1.86687	0.99714	0.981966
A_21_P0000064	1	HPSE	Homo sapiens heparanase (HPSE), transcript variant 1, mRNA [NM_006665]	CTGCAGTTCTGCGCTTTTTACCAGTGAAAAAATGTAATTATTTTCCCCTCTTAAGGATTA	10855	heparanase	NM_006665	1.92465	3.44456	1.8919	1.91535	0.348709	0.983874
A_21_P0000065	1	SLC1A3	Homo sapiens solute carrier family 1 (glial high affinity glutamate transporter), member 3 (SLC1A3), transcript variant 3, mRNA [NM_001166696]	ACACAGATCTCTTTCATTCATTGCTTTGCAGAGCCTGCCATAACCAGCTATACCTTTTTT	6507	solute carrier family 1 (glial high affinity glutamate transporter), member 3	NM_001166696	3.44143	1.89465	1.84704	1.87307	2.92164	0.982117
A_21_P0000067	1	SLC34A1	Homo sapiens solute carrier family 34 (type II sodium/phosphate cotransporter), member 1 (SLC34A1), transcript variant 2, mRNA [NM_001167579]	CACTGTGGACTGTCAACTATACCTGCCTGGATTAAACAAGCATCTTTTGAGGACTTGCAA	6569	solute carrier family 34 (type II sodium/phosphate cotransporter), member 1	NM_001167579	1.95602	1.94946	1.9425	2.00954	1.00456	0.954596
A_21_P0000073	2	OSMR	Homo sapiens oncostatin M receptor (OSMR), transcript variant 2, mRNA [NM_001168355]	CGCCAAGATAATTATCACTTTAAATTGTGTGCGTGTGTATTCTCATTTCTTATGTGATGG	9180	oncostatin M receptor	NM_001168355	4.58635	4.84493	3.01951	2.24692	0.835914	1.70834
A_21_P0000074	11	CREBRF	Homo sapiens CREB3 regulatory factor (CREBRF), transcript variant 3, mRNA [NM_001168394]	GTGACCTGTTTTGTCACTCTCTTGAGCATTTATGCAAAGACACCAATAATTTATTGGTTT	153222	CREB3 regulatory factor	NM_001168394	3.55051	4.38966	6.82743	7.71559	0.558973	0.540306
A_21_P0000075	16	SAP25	Homo sapiens Sin3A-associated protein, 25kDa (SAP25), mRNA [NM_001168682]	CTTCTCAGGGCAGAGTGGGCTGGTTGTGTTGACAATAAAACAGTGTTGGTTTGCAAAAAA	100316904	Sin3A-associated protein, 25kDa	NM_001168682	13.1386	13.9991	12.3833	11.9786	0.550761	1.32375
A_21_P0000076	16	CDK1	Homo sapiens cyclin-dependent kinase 1 (CDK1), transcript variant 4, mRNA [NM_001170406]	TTGGACTTTCTGCTTTTATGTCTTGCTTAAGTCTTCCTCACTCAAAGATCGAATGTATTA	983	cyclin-dependent kinase 1	NM_001170406	5.02523	6.61539	6.30983	5.59175	0.332134	1.64498
A_21_P0000080	16	FAM122C	Homo sapiens family with sequence similarity 122C (FAM122C), transcript variant 4, mRNA [NM_001170781]	CTCTTGCACCAGCATTTGCAGAATTAAATTCCTTAGGTTTGTTTCTTTCATATCAACTCT	159091	family with sequence similarity 122C	NM_001170781	5.70619	6.3169	6.9926	7.36137	0.654872	0.774443
A_21_P0000081	16	ZFAND1	Homo sapiens zinc finger, AN1-type domain 1 (ZFAND1), transcript variant 3, mRNA [NM_001170797]	CCGCTTCTCTAGCCAGGCTTAAAAATGACAATAACAAATTTACAGCTAAGGTAACATCTC	79752	zinc finger, AN1-type domain 1	NM_001170797	10.9687	10.7205	10.7223	10.8154	1.18771	0.937546
A_21_P0000082	16	LARP4	Homo sapiens La ribonucleoprotein domain family, member 4 (LARP4), transcript variant 2, mRNA [NM_199188]	AATGAGTACATCCTTGTATTTGTATTTGTTTTCAACATCGCCAAGGTGCTATGGGAAATT	113251	La ribonucleoprotein domain family, member 4	NM_199188	12.8854	12.8336	12.5554	12.1472	1.03652	1.327
A_21_P0000086	16	GOLGA3	Homo sapiens golgin A3 (GOLGA3), transcript variant 2, mRNA [NM_001172557]	AGTGGAACCCTTCTCAGTTCAAATGCTTTGGTTGCAAATAAGAAACCCAACTTCGCCAGG	2802	golgin A3	NM_001172557	6.34325	7.79089	7.0903	6.80898	0.366621	1.21531
A_21_P0000087	16	MCPH1	Homo sapiens microcephalin 1 (MCPH1), transcript variant 2, mRNA [NM_001172574]	GTACCTCCAAATCTTTAATGTCGAAATAAAGGGCTTTTTGCCATTTCTGTTTTCAGTTCA	79648	microcephalin 1	NM_001172574	9.88224	10.3725	8.88485	9.81924	0.711921	0.523262
A_21_P0000089	12	ZFYVE28	Homo sapiens zinc finger, FYVE domain containing 28 (ZFYVE28), transcript variant 6, mRNA [NM_001172660]	TACCTGACTCAGGACATGATTGATGACTACGAGCCGGCCCTCATGTTCAGCATCCCCAGG	57732	zinc finger, FYVE domain containing 28	NM_001172660	4.29813	1.60203	6.4358	5.38301	6.48049	2.07454
A_21_P0000090	16	TSFM	Homo sapiens Ts translation elongation factor, mitochondrial (TSFM), transcript variant 4, mRNA [NM_001172697]	AACCCTCTGCATACAGTAAAGGTTTCTTGAATTCCTCTGAGCTTTCTGGACTTCCAGCTG	10102	Ts translation elongation factor, mitochondrial	NM_001172697	9.35324	8.8544	8.92147	8.35837	1.41307	1.47744
A_21_P0000091	5	LRRC34	Homo sapiens leucine rich repeat containing 34 (LRRC34), transcript variant 1, mRNA [NM_001172780]	TATCTCAGTGAAACTCTTACTTCACACAACAGGAGTCTTAAAGCGTTAGTATGGTTTTAT	151827	leucine rich repeat containing 34	NM_001172780	8.28997	7.92998	2.04887	2.30046	1.28342	0.839971
A_21_P0000092	16	ZBED6	Homo sapiens zinc finger, BED-type containing 6 (ZBED6), mRNA [NM_001174108]	AGCTGGGATCCTGAGCAGAATGAAGTTGTTCAAAGCAGTGAAAAAGAAATACTGCCTTAA	100381270	zinc finger, BED-type containing 6	NM_001174108	8.23781	8.17463	7.98856	8.34961	1.04477	0.778598
A_21_P0000093	7	SUCLG2	Homo sapiens succinate-CoA ligase, GDP-forming, beta subunit (SUCLG2), transcript variant 1, mRNA [NM_001177599]	AAATGGAAGGGCATGGCTTATAGCTGTTCATTCACCAAAAATATTTTAGAATTGTGTCCA	8801	succinate-CoA ligase, GDP-forming, beta subunit	NM_001177599	5.63424	5.75374	3.89836	1.70488	0.920509	4.57406
A_21_P0000094	16	CD33	Homo sapiens CD33 molecule (CD33), transcript variant 3, mRNA [NM_001177608]	AAGTACCAAATACAGTTACAAATCTCCCCAGCTCTCTGTGCATGTGACAGACTTGACCCA	945	CD33 molecule	NM_001177608	5.33629	5.66872	8.77513	8.27909	0.794194	1.41033
A_21_P0000095	16	HDHD1	Homo sapiens haloacid dehalogenase-like hydrolase domain containing 1 (HDHD1), transcript variant 3, mRNA [NM_001178135]	AAGTCCCTGGTTATGGGTAAGAAGGCATTAGAGGCGGCACAGATTATAATAGACGTCTTG	8226	haloacid dehalogenase-like hydrolase domain containing 1	NM_001178135	6.80637	6.88273	8.01574	7.53583	0.948451	1.39465
A_21_P0000096	12	CPXM1	Homo sapiens carboxypeptidase X (M14 family), member 1 (CPXM1), transcript variant 1, mRNA [NM_019609]	GGAGGGACAAAGTGAGGAAAAGGTGCTCATTAAAGCTACCGGGCACCTTAGCTCAAAAAA	56265	carboxypeptidase X (M14 family), member 1	NM_019609	3.67568	3.22902	9.89823	10.2264	1.36289	0.796558
A_21_P0000097	9	PAFAH1B2	Homo sapiens platelet-activating factor acetylhydrolase 1b, catalytic subunit 2 (30kDa) (PAFAH1B2), transcript variant 2, mRNA [NM_001184746]	GAAACAGTACTGGACCAAGGTGCAAACTTGAGTCTAGTGAGGTACTAATGGGCTGAAGTT	5049	platelet-activating factor acetylhydrolase 1b, catalytic subunit 2 (30kDa)	NM_001184746	4.08938	2.76572	4.95441	4.87914	2.503	1.05356
A_21_P0000098	16	CARD8	Homo sapiens caspase recruitment domain family, member 8 (CARD8), transcript variant 6, mRNA [NM_001184904]	GAATTTTGCTCCATTGGTTTATGTACATTCATAAGAAGCAAAGACATGCAGGTTATTTGC	22900	caspase recruitment domain family, member 8	NM_001184904	6.33655	6.32454	5.96937	6.71678	1.00837	0.595672
A_21_P0000100	16	MTRNR2L1	Homo sapiens MT-RNR2-like 1 (MTRNR2L1), mRNA [NM_001190452]	ATGATATTATCTCAGCATTTTACTGTACCCACACCCACCCAAGAACAGGGTTTGTTAAGA	100462977	MT-RNR2-like 1	NM_001190452	16.4752	16.388	17.31	17.3559	1.06225	0.968713
A_21_P0000101	16	MTRNR2L2	Homo sapiens MT-RNR2-like 2 (MTRNR2L2), mRNA [NM_001190470]	AATCACTTGTTCCTTAAATAGGGACTTGTATGAATGGCTCCACGAGGGTTCAGCTGTCTC	100462981	MT-RNR2-like 2	NM_001190470	17.1653	17.171	17.7406	17.5398	0.996049	1.14929
A_21_P0000102	16	MTRNR2L2	Homo sapiens MT-RNR2-like 2 (MTRNR2L2), mRNA [NM_001190470]	TTACTTTCAACCAGTGAAATTGACCTGCCCGTGAAGAGACTTTTAAGTTCAGTTTTTTAA	100462981	MT-RNR2-like 2	NM_001190470	16.219	16.1469	16.6532	16.5331	1.05125	1.08684
A_21_P0000103	16	MTRNR2L3	Homo sapiens MT-RNR2-like 3 (MTRNR2L3), mRNA [NM_001190472]	GATGCCATCCCAGTCTCTTAAATCATCACACATCCTACCCAAGAACAGGGTTTGTTAAGA	100462983	MT-RNR2-like 3	NM_001190472	12.2043	11.9636	9.76193	9.89214	1.18157	0.913697
A_21_P0000106	16	MTRNR2L6	Homo sapiens MT-RNR2-like 6 (MTRNR2L6), mRNA [NM_001190487]	TTCATTTGTTCAATGATTAAAGTCCTACGTGGTCTGAGTTCAGACCGGAGCAAGCCAGGT	100463482	MT-RNR2-like 6	NM_001190487	17.329	17.329	17.5454	17.5073	1	1.02673
A_21_P0000107	16	MTRNR2L7	Homo sapiens MT-RNR2-like 7 (MTRNR2L7), mRNA [NM_001190489]	GGATGCTATCTCAATCTAAAAAATCATCACCACCCTACCCAAGAACAGGGTTTGTTAAGA	100288485	MT-RNR2-like 7	NM_001190489	6.63826	6.4159	10.862	10.9338	1.16664	0.951455
A_21_P0000108	16	MTRNR2L8	Homo sapiens MT-RNR2-like 8 (MTRNR2L8), mRNA [NM_001190702]	ATGCCGAGACTTCACCAGTCAAAGCGAATTACCACGTTTAATTGATCCAATAACTTGACC	100463486	MT-RNR2-like 8	NM_001190702	13.7675	13.7738	15.5717	15.5041	0.995651	1.04803
A_21_P0000109	16	MTRNR2L9	Homo sapiens MT-RNR2-like 9 (pseudogene) (MTRNR2L9), mRNA [NM_001190706]	TCAAAACGAGTTACCACGTACAATTGATCCAATAATTTGACTAACGGAACAAGTTACCCT	100463487	MT-RNR2-like 9 (pseudogene)	NM_001190706	12.929	12.7966	12.6738	12.8266	1.09611	0.899488
A_21_P0000112	16	ZNF726	Homo sapiens zinc finger protein 726 (ZNF726), mRNA [NM_001244038]	TCTGTCTGGAGAAAGAAAAAGAGCCCTGGAATATGAAGCGAGATGAGATGGTGGATGAAC	730087	zinc finger protein 726	NM_001244038	8.67968	8.87897	8.90599	8.83412	0.870978	1.05108
A_21_P0000113	1	TNFSF10	Homo sapiens tumor necrosis factor (ligand) superfamily, member 10 (TNFSF10), transcript variant 3, mRNA [NM_001190943]	TGTAGCTACATTAACTTGTTAACCTCCCATCCACTTATACCCAGGACCTTACTCAATTTT	8743	tumor necrosis factor (ligand) superfamily, member 10	NM_001190943	1.97904	1.96859	1.96314	2.04838	1.00727	0.942624
A_21_P0000115	16	CNPY2	Homo sapiens canopy FGF signaling regulator 2 (CNPY2), transcript variant 2, mRNA [NM_001190991]	GCACTGTGGTATACATGCAAACATCCGTTCAAAATCTGAGTCGGAGCTAAAAATAAAAAA	10330	canopy FGF signaling regulator 2	NM_001190991	11.9337	12.0168	11.6586	11.7733	0.944059	0.923583
A_21_P0000118	13	LEKR1	Homo sapiens leucine, glutamate and lysine rich 1 (LEKR1), transcript variant 2, mRNA [NM_001193283]	GCATTCTCTTAGCCAAGAACTTGAACAGTACAAAATTGACAACAAATCCAAAACAGAAAG	389170	leucine, glutamate and lysine rich 1	NM_001193283	7.24783	6.5662	5.00112	4.23326	1.60394	1.70274
A_21_P0000119	16	SUGCT	Homo sapiens succinyl-CoA:glutarate-CoA transferase (SUGCT), transcript variant 1, mRNA [NM_001193311]	GGTATTAATGAATCTAGTGCCTTTTAAATGTATCCCACGTTTTGTTCCCTACCATCTTTT	79783	succinyl-CoA:glutarate-CoA transferase	NM_001193311	9.34835	8.63176	5.65231	5.20653	1.64329	1.36205
A_21_P0000120	4	KCNJ18	Homo sapiens potassium channel, inwardly rectifying subfamily J, member 18 (KCNJ18), mRNA [NM_001194958]	GGAGAAACACCGGGTTTCAGCTTTCTCGACCTTAGCTTGGGTGAGACTGTTTACAAAAAA	100134444	potassium channel, inwardly rectifying subfamily J, member 18	NM_001194958	4.23067	5.99278	2.90991	5.44361	0.294817	0.172695
A_21_P0000121	3	C19orf81	Homo sapiens chromosome 19 open reading frame 81 (C19orf81), mRNA [NM_001195076]	CGGCTCGAGGGGGTGGATACTGTGAGTTTAATTATAAAGAATGACCTGGTACAAAAGCCA	342918	chromosome 19 open reading frame 81	NM_001195076	10.3632	9.96076	1.99047	2.00248	1.32176	0.991711
A_21_P0000124	16	DENND1B	Homo sapiens DENN/MADD domain containing 1B (DENND1B), transcript variant 4, mRNA [NM_001195216]	GACTTCTGCATTTTGATTGGGTCCTTCAGTGAAAAATACAGTAGCAGAATTTCTAATGAT	163486	DENN/MADD domain containing 1B	NM_001195216	6.71572	6.50466	6.8807	7.35843	1.15754	0.718107
A_21_P0000126	13	TGFBR3L	Homo sapiens transforming growth factor, beta receptor III-like (TGFBR3L), mRNA [NM_001195259]	ACATGGTCCGGAGATACACCCAGCTACCAATTCGGGACCAGGACCAACAGGACCGGACCC	100507588	transforming growth factor, beta receptor III-like	NM_001195259	4.62085	4.56832	8.46398	8.5245	1.03708	0.95892
A_21_P0000130	16	GS1-259H13.2	Homo sapiens transmembrane protein 225-like (GS1-259H13.2), transcript variant 1, mRNA [NM_001195541]	CCTAAGTGACGTTTTTGCAGGTATTTTCAATAAAAAGAAGGGCTACTTTGTTCATCCATA	100289187	transmembrane protein 225-like	NM_001195541	11.0883	11.8007	8.67252	9.66936	0.610282	0.501096
A_21_P0000131	16	CAMTA1	Homo sapiens calmodulin binding transcription activator 1 (CAMTA1), transcript variant 2, mRNA [NM_001195563]	GCTGATTTCCTCAAATAGAGATACCCCTTTGAGTGATAAATTTGCAAAATGCTGTCTTCA	23261	calmodulin binding transcription activator 1	NM_001195563	11.9101	11.5115	13.0038	12.8317	1.3182	1.12672
A_21_P0000132	16	C16orf93	Homo sapiens chromosome 16 open reading frame 93 (C16orf93), transcript variant 2, mRNA [NM_001195620]	GCTTCCTTATCTAGAAATTAAGGATACAGCACACATTTTACAGGACTGTTCTGAGAAATA	90835	chromosome 16 open reading frame 93	NM_001195620	6.70284	5.79688	8.10418	7.57368	1.8738	1.44443
A_21_P0000137	16	BEAN1	Homo sapiens brain expressed, associated with NEDD4, 1 (BEAN1), transcript variant 4, mRNA [NM_001197224]	ACATGCCTGGACAGTGAGGAGGTCCTGCCTTGCTTCAGTGACCCTGTCTTACACTGGATG	146227	brain expressed, associated with NEDD4, 1	NM_001197224	4.98581	4.85211	4.89277	5.10616	1.0971	0.862513
A_21_P0000138	1	BTN2A2	Homo sapiens butyrophilin, subfamily 2, member A2 (BTN2A2), transcript variant 4, mRNA [NM_001197238]	AGGAAAAAGAAATTGCACAGCAACTTCAAGAAGAATTGCGATGGAGAAGAACATTCTTAC	10385	butyrophilin, subfamily 2, member A2	NM_001197238	2.78083	2.02481	1.97932	4.13436	1.68883	0.224527
A_21_P0000140	16	LEPROT	Homo sapiens leptin receptor overlapping transcript (LEPROT), transcript variant 3, mRNA [NM_001198683]	AACCAGGATTATCATCTATATTGGAAGTCAGCAAACTGCCACATATAACCTGCTACCTGT	54741	leptin receptor overlapping transcript	NM_001198683	6.77575	6.85522	8.62844	9.3036	0.94641	0.62626
A_21_P0000141	16	RBM4	Homo sapiens RNA binding motif protein 4 (RBM4), transcript variant 3, mRNA [NM_001198844]	TGGCATGTAGGTATGATATTAGAAGAGTTTCCTTTGACAAAGGACAATGACCCAAGAAGT	5936	RNA binding motif protein 4	NM_001198844	7.35816	7.96856	8.53987	8.50461	0.655014	1.02474
A_21_P0000142	16	RNF103	Homo sapiens ring finger protein 103 (RNF103), transcript variant 3, mRNA [NM_001198952]	CTGCTATGGAGGTGAAGCACATAGCAAGCCACTTTATCTTATATTTTGTATTGGTAAAAA	7844	ring finger protein 103	NM_001198952	7.17176	7.66192	6.87428	7.84673	0.711949	0.509641
A_21_P0000143	9	DCTN5	Homo sapiens dynactin 5 (p25) (DCTN5), transcript variant 2, mRNA [NM_001199011]	GCGTCTGATTCTTTTTCAAAAGCAACTGGAAATCTCACTTTTTAAAATGCAAGATGTTCC	84516	dynactin 5 (p25)	NM_001199011	3.61445	4.21799	4.11932	4.3862	0.658138	0.831112
A_21_P0000144	5	LOC100505478	Homo sapiens uncharacterized LOC100505478 (LOC100505478), mRNA [NM_001199233]	TCACTCCAGCTCCTAAAAAGCCACCATGGGAAGAGCTGCCTCCAATTAAAGTTCTTGATT	100505478	uncharacterized LOC100505478	NM_001199233	4.2253	4.54359	3.65283	3.38122	0.802019	1.20716
A_21_P0000145	16	TMEM56-RWDD3	Homo sapiens TMEM56-RWDD3 readthrough (TMEM56-RWDD3), mRNA [NM_001199691]	CTGATGTTCATGGGTAAAATAATACTGATTTTACTACAGGGAGACAGAAACAACCTCAAG	100527978	TMEM56-RWDD3 readthrough	NM_001199691	7.11022	6.7275	7.08524	6.84479	1.3038	1.18136
A_21_P0000146	15	PDK2	Homo sapiens pyruvate dehydrogenase kinase, isozyme 2 (PDK2), transcript variant 4, mRNA [NM_001199900]	GAGTCTTTGAATAGTTACTCCAGTAACTATGGAGTTAATGGCTCCAACATGGAAAAATAA	5164	pyruvate dehydrogenase kinase, isozyme 2	NM_001199900	7.19673	5.98583	6.25516	6.37523	2.31482	0.920138
A_21_P0000147	16	PGM3	Homo sapiens phosphoglucomutase 3 (PGM3), transcript variant 4, mRNA [NM_001199919]	AGACTCACAAGAAAGTGCAGATCACCTTGCACATGAAGTGAGCTTGGCAGTATTTCAGCT	5238	phosphoglucomutase 3	NM_001199919	7.96352	7.68756	7.81189	8.44449	1.2108	0.645013
A_21_P0000148	16	NDUFB6	Homo sapiens NADH dehydrogenase (ubiquinone) 1 beta subcomplex, 6, 17kDa (NDUFB6), transcript variant 1, mRNA [NM_002493]	TTGAAAAGAAGTCCAGAATATTCCCTGGTGATACAATTCTGGAGACTGGAGAAGTAATTC	4712	NADH dehydrogenase (ubiquinone) 1 beta subcomplex, 6, 17kDa	NM_002493	13.1051	12.8454	12.9399	12.5554	1.19727	1.30543
A_21_P0000149	16	GCFC2	Homo sapiens GC-rich sequence DNA-binding factor 2 (GCFC2), transcript variant 3, mRNA [NM_001201335]	TATGTGTAATAATGTTTATTAATGCCTGACCTCCCACCTTGATGTTTTTGGACAGGTTAA	6936	GC-rich sequence DNA-binding factor 2	NM_001201335	7.76648	7.48061	8.22258	8.33323	1.21914	0.92617
A_21_P0000152	14	CD44	Homo sapiens CD44 molecule (Indian blood group) (CD44), transcript variant 8, mRNA [NM_001202557]	CAAAGAGTCTTTATACCTCCCTTCAGCTTCCTCATTTTCCCTTGGATTACTTTTGCTCAA	960	CD44 molecule (Indian blood group)	NM_001202557	4.65227	5.0364	5.0747	4.60007	0.76624	1.38956
A_21_P0000153	16	NR3C1	Homo sapiens nuclear receptor subfamily 3, group C, member 1 (glucocorticoid receptor) (NR3C1), transcript variant 8, mRNA [NM_001204265]	CATAGCTTTGATTGATACCATGAAGGTATAATTCAGTGCCTGGATACTAACAACTTTACT	2908	nuclear receptor subfamily 3, group C, member 1 (glucocorticoid receptor)	NM_001204265	8.33243	9.33691	7.54509	8.35996	0.498449	0.56846
A_21_P0000155	16	PSMC2	Homo sapiens proteasome (prosome, macropain) 26S subunit, ATPase, 2 (PSMC2), transcript variant 2, mRNA [NM_001204453]	TGGGGGAGTACTTGCTTTAGGATAGTTGTGATGCTAAGTGTGTTAATGTCTATAGAATAC	5701	proteasome (prosome, macropain) 26S subunit, ATPase, 2	NM_001204453	7.94796	8.08055	7.52431	7.76022	0.912192	0.849153
A_21_P0000156	3	TLL1	Homo sapiens tolloid-like 1 (TLL1), transcript variant 2, mRNA [NM_001204760]	CTCATGTTTCTGACTTCTATTATGGCTTATTTTGGTCCTGCCTATAGCTTACATTATAGA	7092	tolloid-like 1	NM_001204760	6.46427	6.03909	1.95144	1.95934	1.34274	0.994539
A_21_P0000157	16	ZNF587B	Homo sapiens zinc finger protein 587B (ZNF587B), mRNA [NM_001204818]	CTCTTCAAACAACCATTGATTTACTTTGCTGTATGATGGAGTACTTTCCATTTTCTGGAA	100293516	zinc finger protein 587B	NM_001204818	8.47172	9.00351	10.6533	9.66807	0.691695	1.97964
A_21_P0000158	16	XPNPEP3	Homo sapiens X-prolyl aminopeptidase (aminopeptidase P) 3, putative (XPNPEP3), transcript variant 2, mRNA [NM_001204827]	GTCCACCCAAGGTTTACTGCTGTAAAACATGTAATTAAAGATTTGGAAAGTTGTGTGTTT	63929	X-prolyl aminopeptidase (aminopeptidase P) 3, putative	NM_001204827	10.2178	9.68168	8.21879	8.18366	1.45008	1.02464
A_21_P0000161	16	USB1	Homo sapiens U6 snRNA biogenesis 1 (USB1), transcript variant 3, mRNA [NM_001204911]	TGCTAGTGTCTCAGAGAATAAAGGACAGAACCAGTCCAAGTCAAAGCACTTACCTAGCTG	79650	U6 snRNA biogenesis 1	NM_001204911	7.12179	7.20137	6.20923	6.77895	0.946328	0.673745
A_21_P0000163	16	RNF223	Homo sapiens ring finger protein 223 (RNF223), mRNA [NM_001205252]	TGACAACATCTTCAAGACACCCAAGGAGCTCTCCTGCACCCACGTCTTCTGCCTGGAGTG	401934	ring finger protein 223	NM_001205252	5.82906	5.88437	6.06492	5.65209	0.962389	1.33129
A_21_P0000166	3	PPP5D1	Homo sapiens PPP5 tetratricopeptide repeat domain containing 1 (PPP5D1), mRNA [NM_001205281]	GTTTTAAAAACGTGTACTTTTACTGCTGCGTTCAGGTTTTCAGCCATAGAATATTCTAGA	100506012	PPP5 tetratricopeptide repeat domain containing 1	NM_001205281	3.069	3.61695	2.22592	7.74665	0.683995	0.0217818
A_21_P0000168	16	ATF7	Homo sapiens activating transcription factor 7 (ATF7), transcript variant 4, mRNA [NM_001206682]	ATATTTGTTGCCAAATTCCACTCTTTTCTGAGCTGATCAGACTTCTCAGCTACACTGTTT	11016	activating transcription factor 7	NM_001206682	10.4143	10.0828	8.43295	8.69114	1.25831	0.836138
A_21_P0000169	9	TMPRSS13	Homo sapiens transmembrane protease, serine 13 (TMPRSS13), transcript variant 3, mRNA [NM_001206790]	TATATGGCCAGCCCTATAGTACAGTTGCAAATAGAAATAAAATACACCAAGACGACCAGT	84000	transmembrane protease, serine 13	NM_001206790	4.96134	5.68592	3.29612	4.00726	0.605171	0.610838
A_21_P0000171	11	IL6R	Homo sapiens interleukin 6 receptor (IL6R), transcript variant 3, mRNA [NM_001206866]	TCTACAGACTACGGTTTGAGCTCAGATATCGGGCTGAACGGTCAAAGACATTCACAACAT	3570	interleukin 6 receptor	NM_001206866	2.13079	2.09814	4.57271	5.19843	1.02289	0.648096
A_21_P0000172	16	CSPG5	Homo sapiens chondroitin sulfate proteoglycan 5 (neuroglycan C) (CSPG5), transcript variant 5, mRNA [NM_001206945]	GTCTGTACATTGCTTCTGCTGCTGTGATTTCTAAACCTGTGCTGTTATTCAACTGACTTT	10675	chondroitin sulfate proteoglycan 5 (neuroglycan C)	NM_001206945	6.48113	6.39954	5.79427	5.83786	1.05818	0.970239
A_21_P0000179	16	TMEM147	Homo sapiens transmembrane protein 147 (TMEM147), transcript variant 2, mRNA [NM_001242597]	CTTTTCCCTGCCTCACTCCAGGTTTTAGTGAAGTAAACAGTATTTGGAAAGTTGAAAAAA	10430	transmembrane protein 147	NM_001242597	13.4878	13.1757	13.9351	13.8219	1.24154	1.08159
A_21_P0000180	12	TMEM262	Homo sapiens transmembrane protein 262 (TMEM262), transcript variant 1, mRNA [NM_001282448]	TAAGGAGGGGGAAGCAAAAGGCTGCCTCGGGTGTTTTAATAAAGTTGTTGTTTATTTCCA	100130348	transmembrane protein 262	NM_001282448	4.05181	3.96511	5.38079	5.50778	1.06194	0.915739
A_21_P0000181	16	CAMTA1	Homo sapiens calmodulin binding transcription activator 1 (CAMTA1), transcript variant 3, mRNA [NM_001242701]	AAATAGAATAAAGTGACCTACTCTTGCCTCATCCGGAGTTATTACGAAGGAGCTCCGCAG	23261	calmodulin binding transcription activator 1	NM_001242701	9.58946	9.16788	9.34804	8.89952	1.33939	1.36464
A_21_P0000182	3	LOC100507462	Homo sapiens uncharacterized LOC100507462 (LOC100507462), mRNA [NM_001242740]	TTGTGTTCGCTCTTTTTAGGACCAAGAAAAAATTATTGGTTGCTGTTTTCTCAGTTTTGG	100507462	uncharacterized LOC100507462	NM_001242740	1.72776	1.72478	3.45534	1.70004	1.00207	3.37596
A_21_P0000184	10	ZNF790	Homo sapiens zinc finger protein 790 (ZNF790), transcript variant 4, mRNA [NM_001242802]	CTTCAAGCTCTCACTTCATTTCACTCTTGTGAAATATTATATAAAAGTGTAGGAAGGGCT	388536	zinc finger protein 790	NM_001242802	2.25912	2.20715	5.52144	4.2748	1.03667	2.37288
A_21_P0000185	13	LOC100505549	Homo sapiens uncharacterized LOC100505549 (LOC100505549), mRNA [NM_001242804]	CCATTGTGCCAGTGTCAAATGCTGAAGTTACAATTATCTCTTAAGCATGAGATCAAATAT	100505549	uncharacterized LOC100505549	NM_001242804	5.53954	5.05535	5.32087	2.77763	1.3988	5.82899
A_21_P0000189	16	DR1	Homo sapiens down-regulator of transcription 1, TBP-binding (negative cofactor 2) (DR1), mRNA [NM_001938]	CCAAAGGTAGTCTAGTCTAGAACGATAAGTTAATACGTGTTGGCTTTTCTAATTTGTACT	1810	down-regulator of transcription 1, TBP-binding (negative cofactor 2)	NM_001938	10.5261	10.755	11.1847	11.317	0.853299	0.912354
A_21_P0000193	16	SF3A3	Homo sapiens splicing factor 3a, subunit 3, 60kDa (SF3A3), mRNA [NM_006802]	GAGACCCCATTTGCCTCTCAACACTCAGACCTTCAACTGTTTTTTAATAAATCTACTTTT	10946	splicing factor 3a, subunit 3, 60kDa	NM_006802	11.7925	11.8606	12.2023	12.0708	0.953923	1.09545
A_21_P0000195	16	FAM208B	Homo sapiens family with sequence similarity 208, member B (FAM208B), mRNA [NM_017782]	CCAAGCAAAAAACATTTGTAAGATACACGGTATCTATTTGGAGCAACGGTTTTTGTAACT	54906	family with sequence similarity 208, member B	NM_017782	13.8497	12.5856	12.3615	11.1874	2.40169	2.25658
A_21_P0000197	16	HIST1H2AG	Homo sapiens histone cluster 1, H2ag (HIST1H2AG), mRNA [NM_021064]	TCTGTACTAGTTTGTGGCAGCTCAAGTAAAATCGAGTCCAAACCAACGGCTCTTTTCAGG	8969	histone cluster 1, H2ag	NM_021064	9.50602	9.01717	10.215	10.1851	1.40333	1.02096
A_21_P0000198	5	IQCH	Homo sapiens IQ motif containing H (IQCH), transcript variant 2, mRNA [NM_022784]	GGCAAGATGTGAGTTGCTGTAGAATTATACCAGTTCTTTGGTTCTACTTTCCAAATAAAT	64799	IQ motif containing H	NM_022784	4.53051	1.81223	4.16299	4.3813	6.5809	0.859571
A_21_P0000199	16	HOXA6	Homo sapiens homeobox A6 (HOXA6), mRNA [NM_024014]	AAAGGAAAACAAGCTCATCAATTCCACGCAGCCCAGCGGGGAGGACTCAGAGGCAAAGGC	3203	homeobox A6	NM_024014	7.26493	8.05022	8.15007	8.09972	0.580237	1.03551
A_21_P0000200	16	MCPH1	Homo sapiens microcephalin 1 (MCPH1), transcript variant 1, mRNA [NM_024596]	TAATTGAAAGGTCACAGAACCTTTGTCATTAGAGCACAGTACTGCCAAATAAAGAATGGA	79648	microcephalin 1	NM_024596	8.27711	7.01606	8.05889	7.85126	2.3967	1.15479
A_21_P0000201	16	RAB6C	Homo sapiens RAB6C, member RAS oncogene family (RAB6C), mRNA [NM_032144]	CATTAGCCCACATACCAGTAACTTATACTTAAAGATGGGATGGAGTTATAAAGTGCTTTT	84084	RAB6C, member RAS oncogene family	NM_032144	12.5964	12.7475	13.2118	13.2302	0.900531	0.987379
A_21_P0000202	16	MGAT4B	Homo sapiens mannosyl (alpha-1,3-)-glycoprotein beta-1,4-N-acetylglucosaminyltransferase, isozyme B (MGAT4B), transcript variant 2, mRNA [NM_054013]	TCCACATATACTTCTATAAGAGCGTGACTTGTAATAAAGGGTTAATGAAGTGTGTGCCTC	11282	mannosyl (alpha-1,3-)-glycoprotein beta-1,4-N-acetylglucosaminyltransferase, isozyme B	NM_054013	11.7599	12.2593	14.1434	14.4921	0.707412	0.785276
A_21_P0000205	15	C2orf48	Homo sapiens chromosome 2 open reading frame 48 (C2orf48), mRNA [NM_182626]	AGATCTGCTGCTTTCAATCACACCCACTGCCTCTCATGCCGGAGTGGGGGAAATGGAACC	348738	chromosome 2 open reading frame 48	NM_182626	5.29238	5.36995	4.48037	5.39413	0.947651	0.530799
A_21_P0000207	16	RPS3A	Homo sapiens ribosomal protein S3A (RPS3A), transcript variant 2, mRNA [NM_001267699]	GTGATGAAAAAAGTTTCGGTCCCAGATGATGGCCAGTGATAACAACATTTTTCTGATGTT	6189	ribosomal protein S3A	NM_001267699	9.08845	9.21562	9.16099	8.77601	0.915628	1.30584
A_21_P0000305	16	PDCL3	Homo sapiens phosducin-like 3 (PDCL3), mRNA [NM_024065]	GCTATCACATGCCGAACTTTCTTGTGACAAATGTCTGGATTTTTTAAAAAAGGAAAAAGC	79031	phosducin-like 3	NM_024065	11.2313	10.8908	11.2372	11.3181	1.26622	0.945493
A_21_P0000344	16	RPL32	Homo sapiens ribosomal protein L32 (RPL32), transcript variant 3, mRNA [NM_001007074]	AGGCACCCATTCCATTCCCAGCTTGCTCCGTAGCTGGTGATTGGAAGACACTCTGCGACA	6161	ribosomal protein L32	NM_001007074	9.79938	10.242	10.5863	10.3484	0.735819	1.17922
A_21_P0000548	16	PDCD6IP	Homo sapiens programmed cell death 6 interacting protein (PDCD6IP), transcript variant 4, mRNA [NM_001256192]	GACAGCTAAGGAAAGCAACCATCTTAAACCACATATCACAGGAAGTATAATGTTTTAATG	10015	programmed cell death 6 interacting protein	NM_001256192	8.32849	8.47912	8.00915	8.06901	0.900856	0.959358
A_21_P0000585	16	TRAPPC1	Homo sapiens trafficking protein particle complex 1 (TRAPPC1), transcript variant 1, mRNA [NM_021210]	GTTTTATCCCCTGCCTAATGCTGCGAGAAGCACAGAATAAACTTTTTGTCACTCTCTGCG	58485	trafficking protein particle complex 1	NM_021210	13.4232	13.6312	12.748	12.6519	0.865739	1.0689
A_21_P0000598	16	FBXW4	Homo sapiens F-box and WD repeat domain containing 4 (FBXW4), mRNA [NM_022039]	CCCTACCTCAGGCTGGCTGTTGAGAGATTTTACAATTTTCATTTTTGTAAAAATAAAGCT	6468	F-box and WD repeat domain containing 4	NM_022039	9.69342	9.88807	9.9207	10.3349	0.873785	0.750429
A_21_P0000599	16	MKRN1	Homo sapiens makorin ring finger protein 1 (MKRN1), transcript variant 1, mRNA [NM_013446]	GGAAGATTTTTATGACTTGGATCTATAGCAACCTTGTGTGGCGTGTGAACTGGTCTGCTG	23608	makorin ring finger protein 1	NM_013446	9.03843	9.35747	8.82811	9.04927	0.801606	0.857871
A_21_P0000624	15	SLC6A13	Homo sapiens solute carrier family 6 (neurotransmitter transporter), member 13 (SLC6A13), transcript variant 3, mRNA [NM_001243392]	GATAACCAAACTGTTCTGTGGTCTTAAGTAATAAATAGTAGCTCTGCTGATGATGACGTT	6540	solute carrier family 6 (neurotransmitter transporter), member 13	NM_001243392	2.35145	5.41633	7.92893	7.13346	0.119503	1.73565
A_21_P0000650	16	ZNF253	Homo sapiens zinc finger protein 253 (ZNF253), mRNA [NM_021047]	TCCTCAACCCTTACTACACATAAGAAAATTCATACTGGAGAGAAACCCTACAAATGTGAA	56242	zinc finger protein 253	NM_021047	13.1583	13.4689	13.7518	13.7886	0.80631	0.974763
A_21_P0000666	16	LOC100129361	Homo sapiens chromosome X open reading frame 69-like (LOC100129361), mRNA [NM_001271592]	GGTGGTGAGCCAATCAAGATCTGATATAGAAAAATGCAGAAAAAGGAGTATACACATGTT	100129361	chromosome X open reading frame 69-like	NM_001271592	6.79877	6.90166	7.25088	6.08019	0.931163	2.25119
A_21_P0000669	16	EFTUD1	Homo sapiens elongation factor Tu GTP binding domain containing 1 (EFTUD1), transcript variant 1, mRNA [NM_024580]	TTTCCTCAGACGTATCAACCGCTGTTCGCATTTGTGATGGATGCATCATTGTGGTAGATG	79631	elongation factor Tu GTP binding domain containing 1	NM_024580	5.57321	5.55968	6.23011	5.82606	1.00942	1.32322
A_21_P0000671	10	MT1E	Homo sapiens metallothionein 1E (MT1E), mRNA [NM_175617]	ATGTGGGAACAGCTCTTCTCCCAGATGTTAATAGAACAACCTGCACAACCTGGATTTTTT	4493	metallothionein 1E	NM_175617	5.48045	5.13314	4.52103	4.52886	1.27219	0.994592
A_21_P0000717	16	METTL23	Homo sapiens methyltransferase like 23 (METTL23), transcript variant 6, mRNA [NM_001206987]	GGTCAAGTCTGTTTGCCTTAGATTTTGATGTCACCTAGACAACACTTAAACTCATATGAA	124512	methyltransferase like 23	NM_001206987	13.093	13.0567	13.6999	13.8543	1.02551	0.898513
A_21_P0001371	16	ZNF717	Homo sapiens zinc finger protein 717 (ZNF717), transcript variant 3, mRNA [NM_001290209]	TGCAGAAGTTTATACGAGACCTAGTTTCCAGGGAAGAACTCACTGATTCCGCGAGGGAGA	100131827	zinc finger protein 717	NM_001290209	6.78388	7.12351	7.29428	7.02447	0.790245	1.20565
A_21_P0002314	12	ERICH2	Homo sapiens glutamate-rich 2 (ERICH2), transcript variant 1, mRNA [NM_001290030]	CTTAACAAATCTACAGTCTGACCTATTGTCATCTTCCTGCTTAAAAGAAAGCACAGGTAA	285141	glutamate-rich 2	NM_001290030	4.47745	4.08314	6.57408	6.6561	1.31431	0.944733
A_21_P0002475	16	ANKRD36	Homo sapiens ankyrin repeat domain 36 (ANKRD36), mRNA [NM_001164315]	CTGAGAATATTTCAGAACCATACTTTACAAACAGAAGGACTATTTCTCAACAATCTGCAG	375248	ankyrin repeat domain 36	NM_001164315	8.03248	8.27762	7.28089	6.60213	0.843737	1.60077
A_21_P0002595	1	STON1-GTF2A1L	Homo sapiens STON1-GTF2A1L readthrough (STON1-GTF2A1L), transcript variant 2, mRNA [NM_001198593]	CTGACATTGAAATTCCTGCAAGTCTAGGAGCATGTGAACTCAAAATGGAAATTAATTTGA	286749	STON1-GTF2A1L readthrough	NM_001198593	1.94745	1.94589	1.90434	1.93297	1.00108	0.98035
A_21_P0003137	16	MTRNR2L2	Homo sapiens MT-RNR2-like 2 (MTRNR2L2), mRNA [NM_001190470]	CCAAAGAGGAACAGCTCTTTGGACACTAGGAAAAAACCTTGTAAAGAGAGTAAAAAATTT	100462981	MT-RNR2-like 2	NM_001190470	16.505	16.5373	16.8104	16.7135	0.977849	1.06946
A_21_P0004718	1	NQO2	Homo sapiens NAD(P)H dehydrogenase, quinone 2 (NQO2), transcript variant 1, mRNA [NM_001290221]	ATTCTTGTAAGTGTTGCTGGTGTCAGAATAGGAACCTCCCTGCGCTTTGAAGGGATGAAT	4835	NAD(P)H dehydrogenase, quinone 2	NM_001290221	4.13823	4.33855	3.95516	3.81573	0.870359	1.10147
A_21_P0004859	16	BTN2A1	Homo sapiens butyrophilin, subfamily 2, member A1 (BTN2A1), transcript variant 4, mRNA [NM_001197234]	GATGTCTGCTCACCCTCATTCTTCTCCAGCTGCCCAAGCTGGTTTCAGATAGGTCTCTCT	11120	butyrophilin, subfamily 2, member A1	NM_001197234	7.07053	7.99345	10.0882	9.4222	0.527442	1.58666
A_21_P0004860	16	BTN2A1	Homo sapiens butyrophilin, subfamily 2, member A1 (BTN2A1), transcript variant 4, mRNA [NM_001197234]	TGCCCAAGCTGGTTTCAGATAGGTCTCTCTCTCTGGCCTGCAGAGTTAAAACATCTCAAT	11120	butyrophilin, subfamily 2, member A1	NM_001197234	7.98043	8.78138	10.8459	9.99755	0.573973	1.80041
A_21_P0005115	5	RAB44	Homo sapiens RAB44, member RAS oncogene family (RAB44), mRNA [NM_001257357]	TAGAAACTGCGCATTCGGAACTCCCCCAGCAAGACTCTCTGCTTGTTTCTCTCCCATCTG	401258	RAB44, member RAS oncogene family	NM_001257357	1.72042	3.70122	3.48214	2.39971	0.25335	2.11761
A_21_P0006375	1	CYSRT1	Homo sapiens cysteine-rich tail protein 1 (CYSRT1), mRNA [NM_199001]	TCTCAAGCATCTTGGTCTCTGCTAAGAAGAGGCTCAGAGGCTTAGAAGCCCTGCCTCGCC	375791	cysteine-rich tail protein 1	NM_199001	1.63669	1.63303	4.11514	1.64878	1.00254	5.52649
A_21_P0006496	16	GAGE2B	Homo sapiens G antigen 2B (GAGE2B), mRNA [NM_001098411]	CTGAAATGATGCAGGCTGCTCCTATGTTGGAAATTTGTTCATTAAAATTCTCCCAATAAA	645037	G antigen 2B	NM_001098411	9.72301	9.2359	9.6405	9.7027	1.40164	0.957804
A_21_P0006580	16	SLC9A7	Homo sapiens solute carrier family 9, subfamily A (NHE7, cation proton antiporter 7), member 7 (SLC9A7), transcript variant 1, mRNA [NM_001257291]	TTTCCCTCACTGAGAGGTTCTTTTCTGGGTGTAAGCTATTCCTCTCCAGCTTTCTTTAGG	84679	solute carrier family 9, subfamily A (NHE7, cation proton antiporter 7), member 7	NM_001257291	9.20239	8.59832	7.242	7.51094	1.52	0.829929
A_21_P0008759	15	PEAK1	Homo sapiens pseudopodium-enriched atypical kinase 1 (PEAK1), mRNA [NM_024776]	TGTAAGGAAAGAAAAGGAAGCAACAACATAATGCCCAGAGTTGGAGCCAATTAAACCAGG	79834	pseudopodium-enriched atypical kinase 1	NM_024776	4.86752	4.39396	7.42212	7.64538	1.38853	0.856628
A_21_P0008873	12	TP53TG3D	Homo sapiens TP53 target 3D (TP53TG3D), transcript variant 1, mRNA [NM_001243722]	GTCCTTAACGTCAGACTTTCTCCAAGACAAAAACTCTAAGAACTTATTTCCATTCTTACA	729264	TP53 target 3D	NM_001243722	1.92406	1.91324	5.97141	6.26191	1.00753	0.817618
A_21_P0009419	1	LOC100130370	Homo sapiens uncharacterized LOC100130370 (LOC100130370), mRNA [NM_001272086]	AAATGATCAACGTTCAGGGTCCCTTCATCTCAGAGGGTCTCGAGTCACCTCATTTAAAGT	100130370	uncharacterized LOC100130370	NM_001272086	2.09889	2.05617	2.66255	2.20359	1.03005	1.37455
A_21_P0009481	1	RAB27B	Homo sapiens RAB27B, member RAS oncogene family (RAB27B), mRNA [NM_004163]	CAAATAGGGCTTCTGTGTCCATAGCCTTGTAAGAGATACTGATTGTATCTGAAATTATTT	5874	RAB27B, member RAS oncogene family	NM_004163	1.7457	1.74532	1.73076	1.75032	1.00026	0.986527
A_21_P0009685	16	TMEM167A	Homo sapiens transmembrane protein 167A (TMEM167A), mRNA [NM_174909]	GGATGTTTAACTCTTTTATCTCCGAACATTGAATGAGATAAATTTCCAGATGCTGTTCTC	153339	transmembrane protein 167A	NM_174909	10.0736	9.88473	9.4542	9.99128	1.13987	0.689165
A_21_P0010304	6	ANKRD30A	Homo sapiens ankyrin repeat domain 30A (ANKRD30A), mRNA [NM_052997]	CTCTGCAGTGTGAGATTGACTTTAAACCAAGAAGAAGAGAAGAGAAGAAATGCCAATATA	91074	ankyrin repeat domain 30A	NM_052997	2.73699	1.89699	4.23189	2.00593	1.79005	4.67822
A_21_P0010489	16	ZNF605	Homo sapiens zinc finger protein 605 (ZNF605), transcript variant 1, mRNA [NM_183238]	GGACTAAGAGAAGTCACAAAACAGCAGATTTCCCAAGAGCAGCGGAAAATGATCCAGTCA	100289635	zinc finger protein 605	NM_183238	6.49402	6.94808	7.25583	6.81822	0.729987	1.35436
A_21_P0010506	1	TNFRSF14	Homo sapiens tumor necrosis factor receptor superfamily, member 14 (TNFRSF14), transcript variant 1, mRNA [NM_003820]	TTAGGCCAAGTGTGGAGAAATCAATGATGTTGACGATGAGGCTCCCTGAGAGAAATCACA	8764	tumor necrosis factor receptor superfamily, member 14	NM_003820	4.89538	4.2596	3.14234	1.87297	1.55378	2.41056
A_21_P0010536	2	GBP3	Homo sapiens guanylate binding protein 3 (GBP3), mRNA [NM_018284]	TTATTCAGAAGTTACAAGACCTGGAGAAAAAGTACTATGAGGAACCGAGGAAGGGGATAC	2635	guanylate binding protein 3	NM_018284	1.95567	1.95218	2.4839	3.56926	1.00243	0.471275
A_21_P0010552	2	ANKRD20A2	Homo sapiens ankyrin repeat domain 20 family, member A2 (ANKRD20A2), mRNA [NM_001012421]	CTGCCCTTGAAAAGTATATAAAACTCAATGAGGAATTGATAACAAAAACAGCATTCCGGT	441430	ankyrin repeat domain 20 family, member A2	NM_001012421	3.8356	3.08754	2.79986	4.45356	1.67954	0.317824
A_21_P0010595	16	FBXO25	Homo sapiens F-box protein 25 (FBXO25), transcript variant 2, mRNA [NM_183420]	CTTTAATCGGTTAGACTTCTCAAGTGCAATTCAAGATATCCGAAGGTTCAATTATGTGGT	26260	F-box protein 25	NM_183420	9.42972	9.4391	8.30115	8.6019	0.993517	0.811828
A_21_P0010601	13	CROCC	Homo sapiens ciliary rootlet coiled-coil, rootletin (CROCC), mRNA [NM_014675]	ACAACTAGAGCAGCTGGAAGGGAAGCGCTCAGTCCTGGCCAAGGAGCTGGTGGAGGTGAG	9696	ciliary rootlet coiled-coil, rootletin	NM_014675	4.28068	4.0672	5.13907	4.9397	1.15948	1.14819
A_21_P0010602	13	CROCC	Homo sapiens ciliary rootlet coiled-coil, rootletin (CROCC), mRNA [NM_014675]	AATCTGGAGAAGGATCAGGTCGACAAGGACCTCACCGAGAAGCTTGAGGCCCTGGAATCC	9696	ciliary rootlet coiled-coil, rootletin	NM_014675	3.60517	4.48193	4.87521	4.65053	0.54459	1.16852
A_21_P0010647	13	ANKRD20A3	Homo sapiens ankyrin repeat domain 20 family, member A3 (ANKRD20A3), mRNA [NM_001012419]	TTGGCAGGAAGAGAACATATTGTGCATCCCTCACTGAATTCAGTAATAAATAAAAATGTG	441425	ankyrin repeat domain 20 family, member A3	NM_001012419	2.11519	5.20017	4.47557	5.0324	0.11785	0.679795
A_21_P0010658	5	FCRL5	Homo sapiens Fc receptor-like 5 (FCRL5), transcript variant 2, mRNA [NM_001195388]	TCTCTCTGACTGAAGGACATTCAGAGAATTACTACTGCACAGCTGACAATGGCTTTGGTC	83416	Fc receptor-like 5	NM_001195388	1.96855	1.95919	2.93506	1.95871	1.00651	1.96747
A_21_P0010693	15	MST1L	Homo sapiens macrophage stimulating 1-like (MST1L), mRNA [NM_001271733]	TTACCTCCGAACCGCATGCACAACTGGAGGAGAACTTCTGCCAGACCCAGATGGGGATAG	11223	macrophage stimulating 1-like	NM_001271733	4.87914	5.67687	5.67358	6.47995	0.575256	0.571818
A_21_P0010744	16	RPS18	Homo sapiens ribosomal protein S18 (RPS18), mRNA [NM_022551]	ACGGGTGTGTCCAAGAAGGAATAAGTCTGTAGGCCTTGTCTGTTAATAAATAGTTTATAT	6222	ribosomal protein S18	NM_022551	18.555	18.555	18.5298	18.555	1	0.982639
A_21_P0010748	16	2014-09-01	Homo sapiens septin 14 (SEPT14), mRNA [NM_207366]	CAAGTTCGAGCATCTTAAAATGATTCAACAGGAGGAGATAAGGAAGCTCGAGGAAGAGAA	346288	septin 14	NM_207366	8.16953	8.62603	7.80785	7.3424	0.728751	1.38075
A_21_P0010771	16	ANKRD20A2	Homo sapiens ankyrin repeat domain 20 family, member A2 (ANKRD20A2), mRNA [NM_001012421]	AGAATAGTCAATGGAAAAGGAAAAGGGCCTCCTGCAAAACATCCTTCCTTGAAGCCTAGC	441430	ankyrin repeat domain 20 family, member A2	NM_001012421	7.15203	7.48738	8.07014	8.70743	0.792592	0.642918
A_21_P0010775	16	PARP8	Homo sapiens poly (ADP-ribose) polymerase family, member 8 (PARP8), transcript variant 3, mRNA [NM_001178056]	TTTAATGGGGATGTGTTCAAGGCAAGACCGAATTCAGAAGGATATCGACGTCGTGATCCA	79668	poly (ADP-ribose) polymerase family, member 8	NM_001178056	9.32627	9.20028	9.88708	10.0889	1.09125	0.869471
A_21_P0010776	16	PARP8	Homo sapiens poly (ADP-ribose) polymerase family, member 8 (PARP8), transcript variant 3, mRNA [NM_001178056]	TTTGCAGATTCAGATACTCAGACTCCACCTTTACTTTTACCTATGTTGGCGGCCCCAGAA	79668	poly (ADP-ribose) polymerase family, member 8	NM_001178056	8.65101	8.63375	8.94611	8.30821	1.01203	1.55607
A_21_P0010870	16	FAM21C	Homo sapiens family with sequence similarity 21, member C (FAM21C), transcript variant 2, mRNA [NM_001169106]	TTACCCTCAGGAGAAGCAAAACTTCGGAAGACACTCAAGAGAAGAAGGAAAGGAGAACTC	253725	family with sequence similarity 21, member C	NM_001169106	6.71436	6.79877	7.56609	7.11918	0.94317	1.36311
A_21_P0010939	15	SLC9B1	Homo sapiens solute carrier family 9, subfamily B (NHA1, cation proton antiporter 1), member 1 (SLC9B1), transcript variant 1, mRNA [NM_139173]	GGATTTAGTAAACATGTGATTTCAGTACAGGGCTTTTCTTGGACTTTTTACTCCAAAGTT	150159	solute carrier family 9, subfamily B (NHA1, cation proton antiporter 1), member 1	NM_139173	5.39497	5.24564	4.63603	4.77157	1.10906	0.910325
A_21_P0010940	16	SLC9B1	Homo sapiens solute carrier family 9, subfamily B (NHA1, cation proton antiporter 1), member 1 (SLC9B1), transcript variant 2, mRNA [NM_001100874]	CCACTCTGAGTTTGGCATTATGTGTTCGAATTTTAACCACATATCTATTGATGTGCTTTG	150159	solute carrier family 9, subfamily B (NHA1, cation proton antiporter 1), member 1	NM_001100874	5.65488	5.59512	5.21209	6.40042	1.04229	0.43881
A_21_P0010942	3	FAM25A	Homo sapiens family with sequence similarity 25, member A (FAM25A), mRNA [NM_001146157]	CAAAAAGATGAAGGAAGTCACTGAGACAGTGACCAACACAGTCACAAATGCCATCACCCA	643161	family with sequence similarity 25, member A	NM_001146157	1.81208	1.70125	2.93781	3.52731	1.07986	0.664574
A_21_P0010977	2	GLYATL1	Homo sapiens glycine-N-acyltransferase-like 1 (GLYATL1), transcript variant 2, mRNA [NM_001220494]	CTGGAAACAGAAACTCCAAATCCAAGGTTTTCAAGAAAGTTTAGGTGAGGGGATAAGAGC	92292	glycine-N-acyltransferase-like 1	NM_001220494	1.96723	2.5307	3.39536	1.95914	0.676669	2.70611
A_21_P0010986	16	U2AF1	Homo sapiens U2 small nuclear RNA auxiliary factor 1 (U2AF1), transcript variant c, mRNA [NM_001025204]	AGTCAGTATGAGATGGGAGAATGCACACAAGGCAGCTTCTGCAACTTCATGCATTTGAAG	7307	U2 small nuclear RNA auxiliary factor 1	NM_001025204	10.4528	10.2088	11.4798	11.42	1.18424	1.04228
A_21_P0010987	14	LOC100506127	Homo sapiens putative uncharacterized protein FLJ37770-like (LOC100506127), mRNA [NM_001282456]	TAGGCTCATTTTGAAAGAAAACTTGAACATGAGGAAGATTTCTGCAAAAGTTATTTCGGG	100506127	putative uncharacterized protein FLJ37770-like	NM_001282456	4.81049	4.31735	5.31568	4.00094	1.40751	2.48759
A_21_P0011081	16	FAM86C1	Homo sapiens family with sequence similarity 86, member C1 (FAM86C1), transcript variant 3, mRNA [NM_001099653]	TAAGAGACTCATCAGATTCTGAGCTGCTGCGGGATATTTTGCAGAAGACTGTGAAGCATC	55199	family with sequence similarity 86, member C1	NM_001099653	8.53987	8.01402	8.61037	8.04119	1.43977	1.48368
A_21_P0011109	16	RPS27	Homo sapiens ribosomal protein S27 (RPS27), mRNA [NM_001030]	GCAGCACCCAAAGCACTCTGAATCAAGATGAGTGGGAAACCATCTCAATAAACACATTTT	6232	ribosomal protein S27	NM_001030	17.1408	17.1763	17.0841	17.1455	0.975671	0.95836
A_21_P0011126	16	NUS1	Homo sapiens nuclear undecaprenyl pyrophosphate synthase 1 homolog (S. cerevisiae) (NUS1), mRNA [NM_138459]	CATGCATAGAGTCAATCAAATCCTTGTGATGTTTTGTATGGACTTTGACAACATGTAACT	116150	nuclear undecaprenyl pyrophosphate synthase 1 homolog (S. cerevisiae)	NM_138459	11.2507	11.1229	11.2585	10.7727	1.09262	1.40043
A_21_P0011133	16	TPTE2	Homo sapiens transmembrane phosphoinositide 3-phosphatase and tensin homolog 2 (TPTE2), transcript variant 3, mRNA [NM_199254]	AACATCTCTACAACTGGAATCTCCCTCCAAGACGGATACTCTTTATAATAAGATTCATTA	93492	transmembrane phosphoinositide 3-phosphatase and tensin homolog 2	NM_199254	6.32873	6.81645	5.97991	8.27337	0.713154	0.203987
A_21_P0011135	16	EIF4A1	Homo sapiens eukaryotic translation initiation factor 4A1 (EIF4A1), transcript variant 1, mRNA [NM_001416]	AGACCTTCTATAATACCTCCATTGAGGAAATGCCCCTCAATGTTGCTGACCTCATCTGAG	1973	eukaryotic translation initiation factor 4A1	NM_001416	13.182	12.4032	12.0162	11.8134	1.71569	1.15095
A_21_P0011142	16	NAP1L1	Homo sapiens nucleosome assembly protein 1-like 1 (NAP1L1), transcript variant 1, mRNA [NM_139207]	TAAAACAGTTTCCAATGACTCTTTCTTTAAATTTTTTGCCCCTCCTGAAGTTTCTGAGAG	4673	nucleosome assembly protein 1-like 1	NM_139207	15.0244	14.9342	13.4662	13.7661	1.06455	0.812357
A_21_P0011175	16	CASC4	Homo sapiens cancer susceptibility candidate 4 (CASC4), transcript variant 1, mRNA [NM_138423]	CAAGGCATAGACTTTTTTGGTTATGATACAGTTAAGCCAAAAACAGGTAATCTTTGCATG	113201	cancer susceptibility candidate 4	NM_138423	7.32375	7.04543	6.8477	6.69486	1.21278	1.11175
A_21_P0011262	7	XPO6	Homo sapiens exportin 6 (XPO6), transcript variant 1, mRNA [NM_001270940]	CATTGAAACTGATGTGCCATCAGTATTGAAACCTGACCTCATTGATGTACGTGCTCAGTC	23214	exportin 6	NM_001270940	3.71223	4.96998	4.21578	1.94906	0.418196	4.81228
A_21_P0011288	13	RERE	Homo sapiens arginine-glutamic acid dipeptide (RE) repeats (RERE), transcript variant 1, mRNA [NM_012102]	TGAAGATGATGTTGTCTACAGACCAGGAGACTGTGTGTATATCGAGAGTTGGAGGCCAAA	473	arginine-glutamic acid dipeptide (RE) repeats	NM_012102	1.6523	4.06676	5.31835	5.63912	0.187575	0.800643
A_21_P0011306	16	SYNGR2	Homo sapiens synaptogyrin 2 (SYNGR2), mRNA [NM_004710]	GTCAGCCGCTCACTCCTCCAGGGCACTTTTAGGAAAGGGTTTTTAGCTAGTGTTTTTCCT	9144	synaptogyrin 2	NM_004710	12.8266	12.9212	11.7278	11.658	0.936522	1.04959
A_21_P0011314	16	INAFM2	Homo sapiens InaF-motif containing 2 (INAFM2), mRNA [NM_001301268]	ATTCCAAGAATCCTTTGAACTTGTAGAACATCTGGGAGTCCACTTCCCTGTCCTCTTCCT	100505573	InaF-motif containing 2	NM_001301268	10.1285	10.4764	11.2408	11.3809	0.785738	0.907415
A_21_P0011331	3	CSPG4	Homo sapiens chondroitin sulfate proteoglycan 4 (CSPG4), mRNA [NM_001897]	TGTCGTAGAGGGCTGGGCCACATTGTCAGTTGATGGGTTTCTGAACGCCTCCTCTGCAGT	1464	chondroitin sulfate proteoglycan 4	NM_001897	1.66881	1.67174	3.51883	2.87557	0.99797	1.56185
A_21_P0011355	2	GOLGA8K	Homo sapiens golgin A8 family, member K (GOLGA8K), mRNA [NM_001282493]	AATTAGAAAGAGATGAGTATTCTGAACATCTAAAAGGAGAGAGGGCCCGGTGGCAGCAGA	653125	golgin A8 family, member K	NM_001282493	1.96419	2.77988	3.38906	3.08829	0.568133	1.2318
A_21_P0011362	16	GOLGA8R	Homo sapiens golgin A8 family, member R (GOLGA8R), mRNA [NM_001282484]	GAAAAACAGACCTAGAGTTCCAGCAGGAGTGAACAGGAACAGGAAAACAAATGGCAGTAT	101059918	golgin A8 family, member R	NM_001282484	6.14318	5.94948	5.47994	6.38721	1.14369	0.533194
A_21_P0011391	16	CHEK2	Homo sapiens checkpoint kinase 2 (CHEK2), transcript variant 3, mRNA [NM_001005735]	CTGTGGCTTCAGGATGAAGACATGAAGAGAAAGTTTCAAGATCTTCTGTGTGAGGAAAAT	11200	checkpoint kinase 2	NM_001005735	8.31807	8.42043	7.79089	7.51202	0.931509	1.21324
A_21_P0011419	5	PKD1	Homo sapiens polycystic kidney disease 1 (autosomal dominant) (PKD1), transcript variant 2, mRNA [NM_000296]	ACGTGAGCAACGTCACCGTGAACTACAACATCACCGTGGAGCGGATGAACAGGATGCAGG	5310	polycystic kidney disease 1 (autosomal dominant)	NM_000296	1.78994	4.57036	3.0823	2.19675	0.145549	1.84748
A_21_P0011433	16	BCAP31	Homo sapiens B-cell receptor-associated protein 31 (BCAP31), transcript variant 1, mRNA [NM_001139457]	CAAGCACATTACAGGGTACCTGATTGCTACACGTTCAGAATGCATTTGCTGTTATCCTGC	10134	B-cell receptor-associated protein 31	NM_001139457	11.4566	11.4296	11.6771	11.3979	1.01884	1.21356
A_21_P0011439	16	VPS35	Homo sapiens vacuolar protein sorting 35 homolog (S. cerevisiae) (VPS35), mRNA [NM_018206]	AAGATCAGCCAGATCAACCTGTAGAAGACCCTGATCCAGAAGATTTTGCTGATGAGCAGA	55737	vacuolar protein sorting 35 homolog (S. cerevisiae)	NM_018206	9.13622	9.20682	9.11307	9.26327	0.95224	0.901128
A_21_P0011456	16	PLA2G10	Homo sapiens phospholipase A2, group X (PLA2G10), mRNA [NM_003561]	GGCAGGAACTGTGGGTTGTGTTGGTCCCCGAACCCCCATCGCCTATATGAAATATGGTTG	8399	phospholipase A2, group X	NM_003561	6.72797	6.52632	6.23194	5.78878	1.15001	1.35957
A_21_P0011465	16	SMG1	Homo sapiens SMG1 phosphatidylinositol 3-kinase-related kinase (SMG1), mRNA [NM_015092]	CTGCAAAAGATGAAGTTAAAGTCCTCTACTTATGTGCCACCTACAAAGCACTAGAGACTG	23049	SMG1 phosphatidylinositol 3-kinase-related kinase	NM_015092	8.65658	9.16925	9.10797	9.00891	0.700925	1.07108
A_21_P0011468	16	HERC2	Homo sapiens HECT and RLD domain containing E3 ubiquitin protein ligase 2 (HERC2), mRNA [NM_004667]	CTCCTGTCATCGAACGTTTGAGATTCCTCTCTAATGAATTGAGACCTGCTGTTGGTAATG	8924	HECT and RLD domain containing E3 ubiquitin protein ligase 2	NM_004667	9.98936	10.0442	10.0555	9.90278	0.962712	1.11164
A_21_P0011474	16	CHEK2	Homo sapiens checkpoint kinase 2 (CHEK2), transcript variant 3, mRNA [NM_001005735]	AAGTTTCAAGATCTTCTGTCTGAGGAAAATGAATCCACAGGTCTATCCCAGGTTCTAGCC	11200	checkpoint kinase 2	NM_001005735	9.06221	9.32786	8.73443	8.37045	0.831822	1.28697
A_21_P0011476	16	CHEK2	Homo sapiens checkpoint kinase 2 (CHEK2), transcript variant 3, mRNA [NM_001005735]	CTTTTTATCTGAGCCTTAGTGGGTATCCACCTTTCTCTGAGCATAGGACTCAAGTGTCAC	11200	checkpoint kinase 2	NM_001005735	8.94225	9.12951	8.55527	8.28815	0.878274	1.2034
A_21_P0011529	16	RPS6KB1	Homo sapiens ribosomal protein S6 kinase, 70kDa, polypeptide 1 (RPS6KB1), transcript variant 3, mRNA [NM_001272043]	ACATTTTGTGGAACAATAGAATACATGGCCCCTGAAATCTTGATGAGAAGTGGCCACAAT	6198	ribosomal protein S6 kinase, 70kDa, polypeptide 1	NM_001272043	7.10837	7.13617	8.18266	7.98686	0.98092	1.14536
A_21_P0011577	16	TNPO1	Homo sapiens transportin 1 (TNPO1), transcript variant 1, mRNA [NM_002270]	AATACACTTAAGCTGCAGTCCCAAAATTAGGGGTCCTTCAGTCTTGGAGACTATGAGGGA	3842	transportin 1	NM_002270	10.603	10.4453	10.8058	10.5395	1.11553	1.20277
A_21_P0011602	16	USP32	Homo sapiens ubiquitin specific peptidase 32 (USP32), mRNA [NM_032582]	TCTATCTCAAAGGCTGCGCATTAAAGAGGAAGATATGCGCCTGTGGCTATACAACAGTGA	84669	ubiquitin specific peptidase 32	NM_032582	5.36232	6.23034	7.05446	7.05053	0.5479	1.00273
A_21_P0011603	16	AMZ2	Homo sapiens archaelysin family metallopeptidase 2 (AMZ2), transcript variant 1, mRNA [NM_016627]	GTGGGAATAACAATGATTGATCTTTACCCAAGAGACTTGTGGAATTTTGTCTTTGGACAG	51321	archaelysin family metallopeptidase 2	NM_016627	11.9256	12.0471	11.1808	10.9574	0.919225	1.16752
A_21_P0011654	16	NPIPA2	Homo sapiens nuclear pore complex interacting protein family, member A2 (NPIPA2), mRNA [NM_001277324]	ATTCTTCAGGATTGCCCTACTGGCCCTACCTCACAGCTGAAACTTTAAAAAACAGGATGG	642799	nuclear pore complex interacting protein family, member A2	NM_001277324	12.0174	12.4693	12.2336	12.0998	0.731096	1.09717
A_21_P0011678	16	CS	Homo sapiens citrate synthase (CS), mRNA [NM_004077]	TTTTTCTTTGAGAAAGGATTGAGATACGCTCCTGCTGTGCCCCCATCTTTCCTCCAAACT	1431	citrate synthase	NM_004077	13.9276	13.9136	12.4397	12.3235	1.00976	1.08391
A_21_P0011686	16	ZNF730	Homo sapiens zinc finger protein 730 (ZNF730), mRNA [NM_001277403]	CTTTGGCCAGAGCAAGGCATAAAAGATTATTTCCAAGAAGTCATACTGAGACAATATAAA	100129543	zinc finger protein 730	NM_001277403	6.49939	5.90057	7.32069	6.82637	1.51448	1.40866
A_21_P0011714	16	LILRA6	Homo sapiens leukocyte immunoglobulin-like receptor, subfamily A (with TM domain), member 6 (LILRA6), transcript variant 1, mRNA [NM_024318]	TACTATTATATGAACACCCCCCAGGTGTGGTCCCACCCCAGTGACCCCCTGGAGATTCTG	79168	leukocyte immunoglobulin-like receptor, subfamily A (with TM domain), member 6	NM_024318	7.0784	6.94843	7.1697	7.07726	1.09427	1.06617
A_21_P0011715	16	ZNF865	Homo sapiens zinc finger protein 865 (ZNF865), mRNA [NM_001195605]	ATCCCACCCAGGGAGAGTGGGGATCACATGGTGGCAAAGCACAAAGTTAAAACTTGTTTC	100507290	zinc finger protein 865	NM_001195605	7.33212	7.28541	7.39089	6.86723	1.03291	1.4376
A_21_P0011731	16	ZNF728	Homo sapiens zinc finger protein 728 (ZNF728), mRNA [NM_001267716]	GGCAATGCCTGGACACTGCACAGCAGAATTTATATAGGAATGTGATGTTAGAGAACTACA	388523	zinc finger protein 728	NM_001267716	11.7239	11.9432	11.8253	11.9425	0.858972	0.921924
A_21_P0011772	16	SIGLEC11	Homo sapiens sialic acid binding Ig-like lectin 11 (SIGLEC11), transcript variant 2, mRNA [NM_001135163]	TATATCTGGAAGTTCAGAAAGGCCAGTTCCTGCGGCTCCTCTGTGCTGCTGACAGCCAGC	114132	sialic acid binding Ig-like lectin 11	NM_001135163	6.6146	7.0166	6.5469	6.6584	0.756809	0.925628
A_21_P0011781	2	PSG8	Homo sapiens pregnancy specific beta-1-glycoprotein 8 (PSG8), transcript variant 2, mRNA [NM_001130167]	AGAGATACATTGTAAAACGTGACAGTAAGACTGATTCTAGCAGAATAAAACATGTACCAC	440533	pregnancy specific beta-1-glycoprotein 8	NM_001130167	1.84979	2.96047	1.82875	5.26969	0.463077	0.092082
A_21_P0011808	16	ANKRD36	Homo sapiens ankyrin repeat domain 36 (ANKRD36), mRNA [NM_001164315]	CACCAGAACAAGACTTAGAAATGGCATCAGAGGGAGAGCAAAAGAGGCTTGAAGAATATG	375248	ankyrin repeat domain 36	NM_001164315	9.78749	10.0811	10.4278	9.71436	0.815836	1.63972
A_21_P0011813	16	TMEM128	Homo sapiens transmembrane protein 128 (TMEM128), transcript variant 3, mRNA [NM_032927]	AATCTGTTTGAGTCTTTGGAGAAAGTGGTTTCATTGTAGGTACATGATGCACTCTTAATA	85013	transmembrane protein 128	NM_032927	9.39896	9.33279	9.65606	9.40567	1.04693	1.18952
A_21_P0011816	15	IGSF3	Homo sapiens immunoglobulin superfamily, member 3 (IGSF3), transcript variant 2, mRNA [NM_001007237]	AACTCATTCAGCCTGGGCATCTTCAACAGCAGGAAGGAGGACGAGGGCCAGTATGAATGC	3321	immunoglobulin superfamily, member 3	NM_001007237	5.56542	5.14928	5.41575	5.02355	1.33435	1.31239
A_21_P0011841	16	PAFAH1B1	Homo sapiens platelet-activating factor acetylhydrolase 1b, regulatory subunit 1 (45kDa) (PAFAH1B1), mRNA [NM_000430]	GCTACCCCACTGAGCTCTGTTTAAATAAATATTGTCCTTTCATGTAAATTATTCTGGATG	5048	platelet-activating factor acetylhydrolase 1b, regulatory subunit 1 (45kDa)	NM_000430	11.5198	12.1783	11.282	11.9415	0.633528	0.633116
A_21_P0011842	16	EEF1E1	Homo sapiens eukaryotic translation elongation factor 1 epsilon 1 (EEF1E1), transcript variant 2, mRNA [NM_001135650]	AACAAACAATGGTCCAAGTCTAACAGGATTGACTACTATAGCAGCTCATCTAGTCAAGCA	9521	eukaryotic translation elongation factor 1 epsilon 1	NM_001135650	10.586	10.2527	9.73302	9.43198	1.25985	1.23204
A_21_P0011897	16	2014-09-01	Homo sapiens septin 14 (SEPT14), mRNA [NM_207366]	CAGAGGGATTCATGCTAACAGAACATTTTATTTTCTATTTTCCCAGAGCTGTAAAACATG	346288	septin 14	NM_207366	6.9494	7.48002	6.56811	5.87595	0.692257	1.6157
A_21_P0011898	16	2014-09-01	Homo sapiens septin 14 (SEPT14), mRNA [NM_207366]	AAAGCTGCCTCTGAAGCACTGCAGACTCAGCTGAGCACTGATACAAAGAAAGACAAACAT	346288	septin 14	NM_207366	9.4047	9.64475	8.45469	8.35461	0.846718	1.07183
A_21_P0011928	16	PEBP1	Homo sapiens phosphatidylethanolamine binding protein 1 (PEBP1), mRNA [NM_002567]	TTTATGAGCAGGACAGGCCACTAAAGTGTGACGAGCCCATCCTCAGCAACCGATCTGGAG	5037	phosphatidylethanolamine binding protein 1	NM_002567	10.764	10.3291	10.0266	9.54983	1.35177	1.39164
A_21_P0011938	16	ANKRD36B	Homo sapiens ankyrin repeat domain 36B (ANKRD36B), mRNA [NM_025190]	GCCACTGTTCCTTGCTGTGAGTCAAAGAAAAGTGAAAATGGTGGAATTTTTATTAAAGAA	57730	ankyrin repeat domain 36B	NM_025190	11.2954	11.5129	11.1595	10.4283	0.860083	1.66008
A_21_P0012051	16	2014-09-01	Homo sapiens septin 14 (SEPT14), mRNA [NM_207366]	AGGACAAATTCGAGCATCTTAAAATGATTCAACAGGAGGAGATAAGGAAGCTCGAGGAAG	346288	septin 14	NM_207366	8.29493	8.67882	7.36815	7.20022	0.766367	1.12345
A_21_P0012116	16	ZNF850	Homo sapiens zinc finger protein 850 (ZNF850), transcript variant 1, mRNA [NM_001193552]	AACTATAGCAGCCTGGTCTCACTAGGTCTCTCTATCCCAAAGCCTGATGTGATTTCCTTA	342892	zinc finger protein 850	NM_001193552	7.2735	7.11304	6.70727	6.11828	1.11764	1.50419
A_21_P0012236	16	NF1	Homo sapiens neurofibromin 1 (NF1), transcript variant 2, mRNA [NM_000267]	TAATCATACTGAAGGCAGCTCTGAACATCTAGAGCAAGCTAGCATTGAAACAATGATGTT	4763	neurofibromin 1	NM_000267	6.61165	7.0844	7.8576	8.01276	0.720591	0.898036
A_21_P0012238	16	PIK3CA	Homo sapiens phosphatidylinositol-4,5-bisphosphate 3-kinase, catalytic subunit alpha (PIK3CA), mRNA [NM_006218]	GCTTTTGGAGTCCTATTGTCGTGCATGTGGGATGTATTTGAAGCACCTGAATAGGCAAGT	5290	phosphatidylinositol-4,5-bisphosphate 3-kinase, catalytic subunit alpha	NM_006218	7.5988	8.47614	7.51778	7.23279	0.544368	1.2184
A_21_P0012250	16	TMEM191B	Homo sapiens transmembrane protein 191B (TMEM191B), mRNA [NM_001242313]	CAATTGGTGACGCTGCAGAATGAACTGGAGCTGGCGGAGACCAAATGCGCCTTGCAGGAG	728229	transmembrane protein 191B	NM_001242313	7.45706	6.61112	7.526	8.41963	1.79744	0.538259
A_21_P0012273	12	NBEA	Homo sapiens neurobeachin (NBEA), transcript variant 1, mRNA [NM_015678]	TGGCAGAACATCATAAACAGGTTTTATATGATGGGAAACTTGCAAGTAGCATTGCCTTTA	26960	neurobeachin	NM_015678	5.0727	3.98581	4.71604	4.39193	2.12415	1.25189
A_21_P0012276	16	SLC25A15	Homo sapiens solute carrier family 25 (mitochondrial carrier; ornithine transporter) member 15 (SLC25A15), mRNA [NM_014252]	GGTTTCTTGTAGTACAAGACCAGTGTGAAGTTATTCTGATTTCTTGGGAATTTTGCTTTT	10166	solute carrier family 25 (mitochondrial carrier; ornithine transporter) member 15	NM_014252	7.66157	6.88248	6.68393	6.58896	1.71605	1.06805
A_21_P0012280	16	VWF	Homo sapiens von Willebrand factor (VWF), mRNA [NM_000552]	ATTTACGACACCTGCTCCTGTGAGTCCATTGGGGACTGCGCCTGCTTCTGCGACACCATT	7450	von Willebrand factor	NM_000552	4.73717	4.66027	4.74837	4.5307	1.05474	1.16285
A_21_P0012291	13	ZDHHC8	Homo sapiens zinc finger, DHHC-type containing 8 (ZDHHC8), transcript variant 1, mRNA [NM_001185024]	ACTCACTCTTCGGCGACTCAGGCGTCTATGATGCTCCCAGCTCCTACAGCCTGCAGCAGG	29801	zinc finger, DHHC-type containing 8	NM_001185024	4.37588	4.04801	4.81698	4.71034	1.25516	1.07671
A_21_P0012316	16	TMEM191B	Homo sapiens transmembrane protein 191B (TMEM191B), mRNA [NM_001242313]	ACTGTGTGACGGGCAGCTTCGCGGAGTGCAGTACAGCACCGAGTCGCTCATGGAGGAGAT	728229	transmembrane protein 191B	NM_001242313	8.10418	7.62795	8.13235	9.02333	1.3911	0.539245
A_21_P0012333	16	KCNMB3	Homo sapiens potassium channel subfamily M regulatory beta subunit 3 (KCNMB3), transcript variant 2, mRNA [NM_171829]	TCACAAAAATGGAACCCCCTTTTCATGCTTCTACAGTCCAGCCAGCCAATCTGAAGATGT	27094	potassium channel subfamily M regulatory beta subunit 3	NM_171829	7.13733	6.05814	5.95328	4.7481	2.11284	2.30567
A_21_P0012336	16	GGTLC1	Homo sapiens gamma-glutamyltransferase light chain 1 (GGTLC1), transcript variant A, mRNA [NM_178311]	ACTTTGGGGGACGGGCTTCCCCTGTGAGCAGCAGAGCAGCATAATAAATGAGGCCACTGT	92086	gamma-glutamyltransferase light chain 1	NM_178311	8.45951	9.02641	7.56176	7.09777	0.675065	1.37935
A_21_P0012367	1	FGD5	Homo sapiens FYVE, RhoGEF and PH domain containing 5 (FGD5), mRNA [NM_152536]	ACAGCTTGAACAAATGCAGCAACGGACGGCTGCTCTGTGTAGACAGGGGGCTTGATGAGG	152273	FYVE, RhoGEF and PH domain containing 5	NM_152536	1.9829	1.95601	1.95818	3.06789	1.01881	0.463386
A_21_P0012376	16	GEMIN2	Homo sapiens gem (nuclear organelle) associated protein 2 (GEMIN2), transcript variant gamma, mRNA [NM_001009183]	AAGAAGGCTGGAAGAAATTTTCTCTGGGTGAAAAGTTATGTGCTGACGGGGCTGTTGGAT	8487	gem (nuclear organelle) associated protein 2	NM_001009183	7.90882	7.59208	7.27193	7.22346	1.24551	1.03417
A_21_P0012407	16	EIF3J	Homo sapiens eukaryotic translation initiation factor 3, subunit J (EIF3J), transcript variant 1, mRNA [NM_003758]	GATGGAGGTATATGTACAAGACTATGAAGACTTCATGTGACATTTTATCTTTTCCTGGTG	8669	eukaryotic translation initiation factor 3, subunit J	NM_003758	9.81988	9.28588	10.3573	10.2763	1.44794	1.05778
A_21_P0012439	16	TRANK1	Homo sapiens tetratricopeptide repeat and ankyrin repeat containing 1 (TRANK1), mRNA [NM_014831]	AAGTTTCTTGCCTTGCTTTGATCATATTTTCACAACTGGATTCCCAACAGAAGTGTGGCA	9881	tetratricopeptide repeat and ankyrin repeat containing 1	NM_014831	10.0367	9.29478	8.96174	9.36643	1.67245	0.755397
A_21_P0012473	16	VEZF1	Homo sapiens vascular endothelial zinc finger 1 (VEZF1), mRNA [NM_007146]	TAACCAGTCCAATGAACATAGGGCATCCTGTAACTATAACCAGTCCACTATCCATGACCT	7716	vascular endothelial zinc finger 1	NM_007146	7.42971	7.59362	7.21753	7.52278	0.892601	0.809305
A_21_P0012646	16	PRDX6	Homo sapiens peroxiredoxin 6 (PRDX6), mRNA [NM_004905]	GGCCAAAAAACTTTTCCTGAAAGGAGTCTTCACCAAGGAGCTCCCATCTGGCAAGAAATA	9588	peroxiredoxin 6	NM_004905	12.8727	12.7261	11.9127	11.9265	1.10697	0.990525
A_21_P0012651	14	EEF2KMT	Homo sapiens eukaryotic elongation factor 2 lysine methyltransferase (EEF2KMT), transcript variant 2, mRNA [NM_201598]	ACTCATGAAAAAGCCCTCGGGAGGCTCGGTCACACTCTCCAAGAGCACAGCCATCATCTC	196483	eukaryotic elongation factor 2 lysine methyltransferase	NM_201598	5.0121	4.8257	5.99995	5.76073	1.13792	1.18035
A_21_P0012766	2	EVA1C	Homo sapiens eva-1 homolog C (C. elegans) (EVA1C), transcript variant 1, mRNA [NM_058187]	AGGTTCTGAGGAAAGATGGAATCCTTGTTAGTGACTCTCTGGCAGCCTTTGCTTACATTA	59271	eva-1 homolog C (C. elegans)	NM_058187	3.3524	3.27056	3.28434	7.19648	1.05837	0.0664247
A_21_P0012831	1	DOCK9	Homo sapiens dedicator of cytokinesis 9 (DOCK9), transcript variant 4, mRNA [NM_001130050]	AAGCATTCTTTTGATGACAGATATGCTTCAAGGAGTCATCAGGCAAGGATAGCCACCCTC	23348	dedicator of cytokinesis 9	NM_001130050	1.63594	1.66334	2.2738	3.49431	0.98119	0.42913
A_21_P0012878	12	ZDHHC11	Homo sapiens zinc finger, DHHC-type containing 11 (ZDHHC11), mRNA [NM_024786]	AAACAACAGAGCCCATGAAAACTGACAGTGCTGAAAGTGAAGACTGAGATTCGGAGCTCA	79844	zinc finger, DHHC-type containing 11	NM_024786	4.78601	4.2143	5.12606	4.33437	1.48629	1.73111
A_21_P0012903	16	INTS6	Homo sapiens integrator complex subunit 6 (INTS6), transcript variant 1, mRNA [NM_012141]	TTTGCATTAGTGTTGCAGTTGCCTGGCACCATGTCAGTAGAATCAGAACAGTTGACAGGT	26512	integrator complex subunit 6	NM_012141	6.33146	6.74975	6.43222	6.74766	0.748309	0.803604
A_21_P0013005	16	NUBP1	Homo sapiens nucleotide binding protein 1 (NUBP1), transcript variant 2, mRNA [NM_001278506]	AAATCTTGGTATTGTTTGGGAAAGGCAGTGTTGGGAAAAGCACATTCAGTGCCCACCTTG	4682	nucleotide binding protein 1	NM_001278506	7.52311	7.42677	6.675	7.24246	1.06906	0.674805
A_21_P0013035	16	LSM14A	Homo sapiens LSM14A, SCD6 homolog A (S. cerevisiae) (LSM14A), transcript variant 2, mRNA [NM_015578]	TGAAAGTGCAAATGCACAATTCAACAAGGGAGAGATCGACAGAGAGTTTCATAATAAACT	26065	LSM14A, SCD6 homolog A (S. cerevisiae)	NM_015578	7.93728	7.80169	7.81878	7.76896	1.09854	1.03514
A_21_P0013236	16	GTF2I	Homo sapiens general transcription factor IIi (GTF2I), transcript variant 1, mRNA [NM_032999]	TATGGAATCCCAAGGCTGGAAAACATCATTCAAGTGGGCAATCGAATTAAATTTCTTATT	2969	general transcription factor IIi	NM_032999	9.34483	9.59156	8.97047	8.92608	0.842806	1.03124
A_21_P0013240	6	GTF2IRD1	Homo sapiens GTF2I repeat domain containing 1 (GTF2IRD1), transcript variant 3, mRNA [NM_001199207]	AGCCAAGGCCATTGGCATCTCGGAGCCCGTCAAGGTGCCATACTCCAAGTTTCTGATGCA	9569	GTF2I repeat domain containing 1	NM_001199207	4.07314	4.13503	3.35989	4.51134	0.958013	0.450173
A_21_P0013244	7	DTX2	Homo sapiens deltex 2, E3 ubiquitin ligase (DTX2), transcript variant 2, mRNA [NM_001102594]	AACTCAAACAAGTCATTCCTCCTAAGGAGCTGGTGTCTTCATCCAGAAGGGACAGTTTGT	113878	deltex 2, E3 ubiquitin ligase	NM_001102594	3.09097	4.3342	4.07742	3.30162	0.422427	1.71213
A_21_P0013251	16	PMS2	Homo sapiens PMS2 postmeiotic segregation increased 2 (S. cerevisiae) (PMS2), transcript variant 1, mRNA [NM_000535]	CACAGTCAGCGTGAAGCAGTTATTTTCTACGCTACCTGTGCGCCATAAGGAATTTCAAAG	5395	PMS2 postmeiotic segregation increased 2 (S. cerevisiae)	NM_000535	11.8364	12.0521	11.2438	11.1782	0.86112	1.04646
A_21_P0013259	16	GS1-259H13.2	Homo sapiens transmembrane protein 225-like (GS1-259H13.2), transcript variant 1, mRNA [NM_001195541]	TTCTTTACCCTTCTTCAAGCCATGTGAGTGTACACATGTAGCTGTTTGTAGTCCTCCCCA	100289187	transmembrane protein 225-like	NM_001195541	9.75432	10.5025	7.22909	8.59734	0.595373	0.387361
A_21_P0013271	7	SMKR1	Homo sapiens small lysine-rich protein 1 (SMKR1), mRNA [NM_001195243]	ACTTCCTCTGTTATGCCAGATATGGTTAGCCACTTTGGTTTTTTAGGAGCTATAGGATGG	100287482	small lysine-rich protein 1	NM_001195243	6.5925	3.99799	2.62022	1.81832	6.03985	1.74339
A_21_P0013292	16	EIF4H	Homo sapiens eukaryotic translation initiation factor 4H (EIF4H), transcript variant 1, mRNA [NM_022170]	CTGGGCAATCCAGTTGACTTTTAAATGTAAGAATGGAATTCCAAACACTTAACACATTCA	7458	eukaryotic translation initiation factor 4H	NM_022170	14.5349	14.5247	14.7414	14.9735	1.00707	0.851419
A_21_P0013318	16	CRCP	Homo sapiens CGRP receptor component (CRCP), transcript variant 4, mRNA [NM_001142414]	CACCAGAGTCCTGAGATTGTCAGAGAATTTCTCACAGCAATGAAAAGCCACAAGTTGACC	27297	CGRP receptor component	NM_001142414	7.66278	7.67221	7.51047	7.68251	0.993479	0.887588
A_21_P0013322	16	RABGEF1	Homo sapiens RAB guanine nucleotide exchange factor (GEF) 1 (RABGEF1), transcript variant 3, mRNA [NM_001287062]	GATTGGGAAAAATTGATAGTTCTCCTGCCTCAGAGTTTGGCTCCTGCACTCTCATTTCAG	27342	RAB guanine nucleotide exchange factor (GEF) 1	NM_001287062	5.98657	5.79557	5.05089	5.1975	1.14156	0.903372
A_21_P0013333	16	FAM185A	Homo sapiens family with sequence similarity 185, member A (FAM185A), transcript variant 1, mRNA [NM_001145268]	GATGGGTTGCTGAAAGCCAAGTATCTTTATACAGAATCATCATTTCTGTCTTCTGCTGCT	222234	family with sequence similarity 185, member A	NM_001145268	7.06452	7.04982	7.46322	6.92716	1.01024	1.45001
A_21_P0013342	16	CCZ1	Homo sapiens CCZ1 vacuolar protein trafficking and biogenesis associated homolog (S. cerevisiae) (CCZ1), mRNA [NM_015622]	CCGCGGGAAGGAGAGGAGGAAAATAAGATTTTATTTTATCATCCAAATGAGGTAGAAAAG	51622	CCZ1 vacuolar protein trafficking and biogenesis associated homolog (S. cerevisiae)	NM_015622	5.90994	5.984	5.96367	5.47353	0.949962	1.40458
A_21_P0013349	14	FLNC	Homo sapiens filamin C, gamma (FLNC), transcript variant 1, mRNA [NM_001458]	AAGTGTCCCTGGAAGCCCCTTCAAAGTCAAGGTCCCTTGAGTCCCAAAAGTGCCTCCCCA	2318	filamin C, gamma	NM_001458	5.53725	4.95647	4.91557	5.63124	1.49565	0.608922
A_21_P0013386	16	INTS4	Homo sapiens integrator complex subunit 4 (INTS4), mRNA [NM_033547]	TTGACCTTATGCCCCGACTCATGACATCCAAACCTGCAGAAGTGGTCAAAATTCTACAGA	92105	integrator complex subunit 4	NM_033547	8.53695	9.28317	10.3384	10.3653	0.596164	0.981532
A_21_P0013399	16	GS1-259H13.2	Homo sapiens transmembrane protein 225-like (GS1-259H13.2), transcript variant 1, mRNA [NM_001195541]	TACCTGATTATACTGGTGGTCTCCATCTTTCCCTTCTGGGTGCGACTGACAAACGAGGAG	100289187	transmembrane protein 225-like	NM_001195541	7.5879	8.24208	6.01785	6.50123	0.635438	0.715298
A_21_P0013441	16	RABGEF1	Homo sapiens RAB guanine nucleotide exchange factor (GEF) 1 (RABGEF1), transcript variant 1, mRNA [NM_001287060]	TCTAATATCCAGTATATCACGTGCTTCTGCAATCCAAGCCGACTGATGACTGGAGAGGAT	27342	RAB guanine nucleotide exchange factor (GEF) 1	NM_001287060	9.16066	9.24787	9.49206	9.92022	0.941345	0.743212
A_21_P0013567	16	RBPJ	Homo sapiens recombination signal binding protein for immunoglobulin kappa J region (RBPJ), transcript variant 4, mRNA [NM_203284]	AAATGATGGAATCATATATTCCACCAGCCTTACCTTTACCTACACACCAGAAGCAGGGCC	3516	recombination signal binding protein for immunoglobulin kappa J region	NM_203284	11.0237	10.7766	11.4457	11.4306	1.18689	1.01049
A_21_P0013571	2	AQP7	Homo sapiens aquaporin 7 (AQP7), mRNA [NM_001170]	AATAAAACATTTGGGAGCTACCTTGGTGTCAACTTGGGTTTTGGCTTCGGAGTCACCATG	364	aquaporin 7	NM_001170	1.93198	1.93154	2.66118	1.91801	1.00031	1.67384
A_21_P0013574	16	MTHFD1L	Homo sapiens methylenetetrahydrofolate dehydrogenase (NADP+ dependent) 1-like (MTHFD1L), transcript variant 1, mRNA [NM_001242767]	TCACCAACCTGACAAAAAAGGTGTGCCAAGTGACTTCATCTTACCTATCAGTGATGTCCG	25902	methylenetetrahydrofolate dehydrogenase (NADP+ dependent) 1-like	NM_001242767	9.16236	8.95557	7.67748	7.3634	1.15412	1.24321
A_21_P0013605	13	HMCN2	Homo sapiens hemicentin 2 (HMCN2), mRNA [NM_001291815]	TATGTCCCACCTACCATCGAGGGCGCCGGTGGAAGACCATACGTGGTGAAGGCTGTGGCT	256158	hemicentin 2	NM_001291815	4.97676	5.17693	4.91436	4.73308	0.870449	1.13388
A_21_P0013622	16	CLCN3	Homo sapiens chloride channel, voltage-sensitive 3 (CLCN3), transcript variant a, mRNA [NM_001243372]	CAGCAAAAATAAAGAATCAGCATGGGAAATGACAAAAAGTTTGTATGACGCGTGGTCAGG	1182	chloride channel, voltage-sensitive 3	NM_001243372	5.67542	6.05288	4.83959	5.19304	0.769793	0.782708
A_21_P0013634	1	GPR116	Homo sapiens G protein-coupled receptor 116 (GPR116), transcript variant 2, mRNA [NM_001098518]	TCATCCAGTGCTTATTCGTTGCTCAACTAAGAACAGGATAATCCAACATACGTGACCTCC	221395	G protein-coupled receptor 116	NM_001098518	1.85256	5.97229	1.83238	1.83353	0.0575228	0.999204
A_21_P0013662	16	HSPB1	Homo sapiens heat shock 27kDa protein 1 (HSPB1), mRNA [NM_001540]	CCCAGAAGCTGCAAAATCCGACGAGACTGCCGCCAAGTAAAGCCTTAGCCCGGATGCCCA	3315	heat shock 27kDa protein 1	NM_001540	12.6105	12.155	15.6889	13.5231	1.37129	4.48713
A_21_P0013674	13	ANKRD18B	Homo sapiens ankyrin repeat domain 18B (ANKRD18B), mRNA [NM_001244752]	CCTAAGAATTCCTACTTCAAACCCACAGACTTCAAATAACTGCAAGAACTCCTTGACTGA	441459	ankyrin repeat domain 18B	NM_001244752	5.26073	3.78724	6.24045	5.54532	2.77692	1.61902
A_21_P0013728	16	FRG1	Homo sapiens FSHD region gene 1 (FRG1), mRNA [NM_004477]	GGCCTCAAATAGATGCTTTATTAGATACAATGAAGCAGGGGACATAGAAGCAAAAAGTAA	2483	FSHD region gene 1	NM_004477	11.9557	11.7879	11.5747	11.7661	1.12334	0.875711
A_21_P0013760	16	CHTF8	Homo sapiens CTF8, chromosome transmission fidelity factor 8 homolog (S. cerevisiae) (CHTF8), transcript variant 1, mRNA [NM_001039690]	CAAAGAACCTCAAAATTTAAACTGATGTGGATGGGTATATGGGAATTGGGGTGAGGGTGG	54921	CTF8, chromosome transmission fidelity factor 8 homolog (S. cerevisiae)	NM_001039690	9.78969	9.74506	9.80209	9.78092	1.03142	1.01478
A_21_P0013769	16	ETF1	Homo sapiens eukaryotic translation termination factor 1 (ETF1), transcript variant 2, mRNA [NM_001256302]	GGAGCTATGTTGGAAATTGTCACAGATAAATCACAAGAAATGTCTCAGTTTGTGAAAGGA	2107	eukaryotic translation termination factor 1	NM_001256302	9.31419	8.89605	11.1778	10.7704	1.33621	1.32626
A_21_P0013795	16	RPL36A	Homo sapiens ribosomal protein L36a (RPL36A), transcript variant 1, mRNA [NM_021029]	GCTGGGAGGAGATAAGAAGAGAAAGGGCCAAGTGATCCAGTTCTAAGTGTCATCTTTTGT	6173	ribosomal protein L36a	NM_021029	18.0424	17.9897	18.0216	18.0603	1.03719	0.973559
A_21_P0013802	16	TMLHE	Homo sapiens trimethyllysine hydroxylase, epsilon (TMLHE), transcript variant 1, mRNA [NM_018196]	TCTAGTAAGGGAGACTTGTTGGAGAGGCGGGACTCTGAGTTATCTAATGTCAGACATCTA	55217	trimethyllysine hydroxylase, epsilon	NM_018196	6.963	6.31229	7.33856	6.6632	1.56995	1.59699
A_21_P0013806	16	HADHB	Homo sapiens hydroxyacyl-CoA dehydrogenase/3-ketoacyl-CoA thiolase/enoyl-CoA hydratase (trifunctional protein), beta subunit (HADHB), transcript variant 3, mRNA [NM_001281513]	TAAAACCTGCATTCATCAAGCCCTACGGCACAGCGACAGCTGCAAATTCTTCTTTCTTGA	3032	hydroxyacyl-CoA dehydrogenase/3-ketoacyl-CoA thiolase/enoyl-CoA hydratase (trifunctional protein), beta subunit	NM_001281513	10.5719	10.3926	9.21783	9.99198	1.13234	0.584732
A_21_P0013825	16	STAU2	Homo sapiens staufen double-stranded RNA binding protein 2 (STAU2), transcript variant 1, mRNA [NM_001164380]	ACATCTTCTACAGCTGAAGCCACAGGTTTAAAAGGAAGTTCTCCTACTCCCCCTTGTTCT	27067	staufen double-stranded RNA binding protein 2	NM_001164380	9.65052	9.67103	9.06638	8.97113	0.985883	1.06825
A_21_P0013848	16	FOXN3	Homo sapiens forkhead box N3 (FOXN3), transcript variant 2, mRNA [NM_005197]	GCTGATTCAGTAACCAGTTTCATGCTGTGTCATTCACACTCAGTACTTAATACTGCCATA	1112	forkhead box N3	NM_005197	10.5726	10.5213	11.0177	10.3632	1.03623	1.57402
A_21_P0013888	16	TPTE2	Homo sapiens transmembrane phosphoinositide 3-phosphatase and tensin homolog 2 (TPTE2), transcript variant 3, mRNA [NM_199254]	AGAAATGACTTCCAATGACATTGTAGCTGGATCCGATTAAGTATAGCTCCCCCTTCCCCT	93492	transmembrane phosphoinositide 3-phosphatase and tensin homolog 2	NM_199254	7.62622	7.23007	6.52802	6.79284	1.31599	0.832299
A_21_P0013910	16	PTMA	Homo sapiens prothymosin, alpha (PTMA), transcript variant 1, mRNA [NM_001099285]	TGAAGATGATGAGGATGATGATGTCGATACCAAGAAGCAGAAGACCGACAAGGATGACTA	5757	prothymosin, alpha	NM_001099285	16.6532	16.4803	16.3047	15.8107	1.12738	1.40829
A_21_P0013952	16	RBFOX3	Homo sapiens RNA binding protein, fox-1 homolog (C. elegans) 3 (RBFOX3), mRNA [NM_001082575]	TGAAATTCTGCCTCTGAGAAGCTAACAGTCTTCCTGTGGTCGCCACTCCTCCCCAGCAGC	146713	RNA binding protein, fox-1 homolog (C. elegans) 3	NM_001082575	9.46472	9.57081	9.65427	9.76914	0.929103	0.923469
A_21_P0013984	13	AK4	Homo sapiens adenylate kinase 4 (AK4), transcript variant 1, mRNA [NM_001005353]	CCCTACGTTTACACACTTTTCTCAAACAAGATCACACCTATTCAGTCCAAAGAAGCATAT	205	adenylate kinase 4	NM_001005353	2.88643	3.66415	10.3496	10.4407	0.583289	0.938814
A_21_P0013993	16	FAM104B	Homo sapiens family with sequence similarity 104, member B (FAM104B), transcript variant 1, mRNA [NM_138362]	CAAAAGGAATAAGAGAAACCCTATCTTTCAGGATTCTCAAGACACAGTTTTCATGGAGTG	90736	family with sequence similarity 104, member B	NM_138362	6.25573	5.11045	6.76697	6.4017	2.21188	1.28812
A_21_P0014008	16	ZNF322	Homo sapiens zinc finger protein 322 (ZNF322), transcript variant 1, mRNA [NM_001242797]	TGAAAAACCGTTTGTCTGTAATGTGAGTGAAAAAGGTCTTGAGCTTAGCCCTCCCCATGC	79692	zinc finger protein 322	NM_001242797	6.82695	7.15872	8.56831	8.36363	0.794559	1.15243
A_21_P0014031	16	MAPT	Homo sapiens microtubule-associated protein tau (MAPT), transcript variant 6, mRNA [NM_001123066]	TCAAAATCAGTGATGGGAGTAAGAGCAAATTTCATCTTTCCAAATTGATGGGTGGGCTAG	4137	microtubule-associated protein tau	NM_001123066	4.89734	6.21648	8.86732	9.16517	0.400773	0.813467
A_21_P0014377	13	LOC728485	Homo sapiens uncharacterized LOC728485 (LOC728485), mRNA [NM_001294306]	ATGAGATCCGTGCTTTTATCTTGTCTCAGACTCCCAATGATAGGCACATACTCTCCTCTG	728485	uncharacterized LOC728485	NM_001294306	2.93215	4.4052	10.606	10.5218	0.36022	1.06014
A_21_P0014389	16	ACTR3	Homo sapiens ARP3 actin-related protein 3 homolog (yeast) (ACTR3), transcript variant 1, mRNA [NM_005721]	GAAGAGTAAAGACAAGAGTGTTGGACCAGTATTGCAGTTCTGTAGTATCATTTCTTATAA	10096	ARP3 actin-related protein 3 homolog (yeast)	NM_005721	14.0072	13.8199	14.5625	14.3054	1.13867	1.19512
A_21_P0014404	1	LINC01272	Homo sapiens long intergenic non-protein coding RNA 1272 (LINC01272), mRNA [NM_001278655]	TGCATCAGGAGAATAACAAAGATGAGACGCAGGCTCTAACAAGTGGATACCAGTGACTCT	100506115	long intergenic non-protein coding RNA 1272	NM_001278655	1.91194	1.90095	1.856	1.90537	1.00765	0.966357
A_21_P0014626	16	RNF13	Homo sapiens ring finger protein 13 (RNF13), transcript variant 1, mRNA [NM_007282]	TATGGCCTTGTATGAGGGGAGTTTGAATGTTAATAAACATGTTTTCCACTTTAAGATCCA	11342	ring finger protein 13	NM_007282	11.8945	12.0098	11.7962	11.9216	0.923238	0.916729
A_21_P0014663	13	ZNF605	Homo sapiens zinc finger protein 605 (ZNF605), transcript variant 1, mRNA [NM_183238]	GAATGTAGTGAATGTAGGAAAGCTTTTGCCTGGAAGCCACAGCTTCTTAGGCATCAGAGA	100289635	zinc finger protein 605	NM_183238	3.73612	5.32951	5.42596	4.47008	0.331391	1.93976
A_21_P0014671	16	RPS13	Homo sapiens ribosomal protein S13 (RPS13), mRNA [NM_001017]	GATTCACCGTTTGGCTCGATATTATAAGACCAAGCGAGTCCTCCCTCCCAATTGGAAATA	6207	ribosomal protein S13	NM_001017	17.5163	17.5532	16.9377	17.7737	0.974761	0.560199
A_21_P0014711	16	EIF4E2	Homo sapiens eukaryotic translation initiation factor 4E family member 2 (EIF4E2), transcript variant 2, mRNA [NM_001282958]	TTCTAGCTCTGCCATTAAATTATTGGGACATTTTGTTTCTTTCTCTCCCCTCCTCCAAGC	9470	eukaryotic translation initiation factor 4E family member 2	NM_001282958	8.59797	8.81084	7.87757	8.45856	0.86282	0.668507
A_21_P0014721	5	THEGL	Homo sapiens theg spermatid protein-like (THEGL), mRNA [NM_001256475]	TAATCCAAATAAGAGGGCTCCTGTGCGTATTGTGTATTATGATCCAGATGTCTTTAAAAC	100506564	theg spermatid protein-like	NM_001256475	1.95919	3.1846	3.08829	3.55446	0.427675	0.723886
A_21_P0014781	16	FAM220A	Homo sapiens family with sequence similarity 220, member A (FAM220A), mRNA [NM_001037163]	ACACTGGGGTTACTGGCTCTGCAACATTTTGAATTAGCAAATTCATTATGCCATAGTTAA	84792	family with sequence similarity 220, member A	NM_001037163	8.58476	8.77072	7.19441	7.53378	0.879068	0.790387
A_21_P0014793	16	OXR1	Homo sapiens oxidation resistance 1 (OXR1), transcript variant 4, mRNA [NM_001198533]	GGAGATCTCTACCATGCAAGAAGCCATTCTTGTAAAACGTTTGGGAATCGTACACTTTCT	55074	oxidation resistance 1	NM_001198533	8.47234	8.4694	7.7235	8.71156	1.00204	0.504155
A_21_P0014809	16	FAM136A	Homo sapiens family with sequence similarity 136, member A (FAM136A), mRNA [NM_032822]	CACCTCATCCCAACTATGGCCAAGAAGATGAAGGAGGCTCTCTTATCCATTGGGAAATAA	84908	family with sequence similarity 136, member A	NM_032822	11.9004	12.1686	12.3219	12.882	0.830383	0.678269
A_21_P0014949	16	NPEPPS	Homo sapiens aminopeptidase puromycin sensitive (NPEPPS), mRNA [NM_006310]	TGATGAGATATGTGATGCTATATCATATAGCAAAGGTGCATCTGTCATCCGAATGCTGCA	9520	aminopeptidase puromycin sensitive	NM_006310	9.48349	9.7812	9.7495	9.88673	0.813542	0.909266
A_22_P00000261	16	ERICH2	Homo sapiens glutamate-rich 2 (ERICH2), transcript variant 3, mRNA [NM_001290031]	AAGAAGATGTCTTTGATTGTGCAGCTGATCTCTCCCATGCCTTTTAAGCAATTAGAACTA	285141	glutamate-rich 2	NM_001290031	7.01547	6.2494	8.78271	8.40233	1.70064	1.30168
A_22_P00000430	16	ZNF316	Homo sapiens zinc finger protein 316 (ZNF316), mRNA [NM_001278559]	ATTTTTGGTGCAGCTGCATTCCCTAATAGACCTAGTTCCCTCCACGTTAGTGTAGACATG	100131017	zinc finger protein 316	NM_001278559	5.92222	6.04557	5.97908	6.30409	0.918048	0.798291
A_22_P00000575	16	ORAI3	Homo sapiens ORAI calcium release-activated calcium modulator 3 (ORAI3), mRNA [NM_152288]	ATTGAAGCTGTGAGCAACATCCACAACCTCAACTCTGTCCACCAGTCGCCACACCAGAGA	93129	ORAI calcium release-activated calcium modulator 3	NM_152288	8.48508	7.70865	9.21754	9.37597	1.7129	0.895997
A_22_P00000724	3	KIAA1024L	Homo sapiens KIAA1024-like (KIAA1024L), mRNA [NM_001257308]	TATGAAGAATAACCCACTCTATGGTGACCTAAGTTTGGAGGAAGCTATGGAAGAAAGAAA	100127206	KIAA1024-like	NM_001257308	1.68042	2.81885	1.67352	3.0178	0.454254	0.393849
A_22_P00000867	16	AGRN	Homo sapiens agrin (AGRN), mRNA [NM_198576]	CGTGTTACTAACTCTAGTATGTTTCTGTGTCAATCGCTGTGAAATAAAGTCTGAAAACTT	375790	agrin	NM_198576	11.1623	11.463	10.7741	10.9012	0.811887	0.915655
A_22_P00001009	9	LMO7DN	Homo sapiens LMO7 downstream neighbor (LMO7DN), mRNA [NM_001257995]	ATGATTTCGCTGGAAGTGCGGTGGTGGATAAAGGGGAAGCAGGGTTACGTAATTTCACTG	729420	LMO7 downstream neighbor	NM_001257995	4.11421	4.70876	4.30491	3.58989	0.662254	1.64151
A_22_P00001049	16	NBPF11	Homo sapiens neuroblastoma breakpoint family, member 11 (NBPF11), transcript variant 1, mRNA [NM_001101663]	CCTTGTTTTTGTGGTGAAGGATCCTAAAGTGCTGTGGGAGTGATCACATTTTTCACAACA	200030	neuroblastoma breakpoint family, member 11	NM_001101663	8.05667	8.85523	7.63694	8.27414	0.574922	0.64296
A_22_P00001050	16	NBPF8	Homo sapiens neuroblastoma breakpoint family, member 8 (NBPF8), transcript variant 1, mRNA [NM_001037501]	AGAGAACAAACAGCAGTTCGTAAACCTCAAAGAGATGTTTTCTAACTCAACTGGCCGGCT	728841	neuroblastoma breakpoint family, member 8	NM_001037501	7.56691	8.24247	6.89078	7.33309	0.626088	0.735953
A_22_P00001222	16	NDUFV2	Homo sapiens NADH dehydrogenase (ubiquinone) flavoprotein 2, 24kDa (NDUFV2), mRNA [NM_021074]	CCCGCCATGTTCTTCTCCGCGGCGCTCCGGGCCCGGGCGGCTGGCCTCACCGCCCACTGG	4729	NADH dehydrogenase (ubiquinone) flavoprotein 2, 24kDa	NM_021074	11.0313	10.6687	9.80748	9.97299	1.2857	0.891613
A_22_P00001318	10	ANTXRL	Homo sapiens anthrax toxin receptor-like (ANTXRL), mRNA [NM_001278688]	AGCCCTGGCCACGTGTTTGCAGTGGAGAATGGCTTCAAGGCCCTGAGAAGCACCATTGAT	195977	anthrax toxin receptor-like	NM_001278688	4.16313	4.47484	5.38491	4.84493	0.805685	1.45396
A_22_P00001320	16	ANTXRL	Homo sapiens anthrax toxin receptor-like (ANTXRL), mRNA [NM_001278688]	TTCCTGCTGCTGCTGCTGCTTCCTCCACCGCTTTTTAGAGCAGGAAGCCTTCGGTACCAT	195977	anthrax toxin receptor-like	NM_001278688	17.0384	16.9828	15.4646	15.5072	1.03929	0.970915
A_22_P00001477	11	JRK	Homo sapiens Jrk homolog (mouse) (JRK), transcript variant 3, mRNA [NM_001279352]	TGAAGTGCTGTGCCTGGAGATACCATTGTGGACCCTGGAGAGGCACCTGCTGCTTATGCG	8629	Jrk homolog (mouse)	NM_001279352	5.06295	4.71778	3.70088	4.58589	1.2703	0.541485
A_22_P00001478	16	JRK	Homo sapiens Jrk homolog (mouse) (JRK), transcript variant 1, mRNA [NM_003724]	AAAGGAACTGAGGTCCAGAGCAGGGAATGTGTTGCCCAGTGTCAGCATGGTCTGCTCTGG	8629	Jrk homolog (mouse)	NM_003724	7.71664	7.43157	6.30997	6.42155	1.21847	0.925576
A_22_P00001617	16	ZBED1	Homo sapiens zinc finger, BED-type containing 1 (ZBED1), transcript variant 3, mRNA [NM_001171135]	AGGAAAAATACTTCAGGAGGCTTAGCATATTGCTTGGATTCTACGTGCAGCGGGTTCTCT	9189	zinc finger, BED-type containing 1	NM_001171135	7.56661	7.73447	6.74499	6.69536	0.890159	1.035
A_22_P00001664	14	RUSC1-AS1	Homo sapiens RUSC1 antisense RNA 1 (RUSC1-AS1), mRNA [NM_001039517]	AGAGGAAAAGGATGGAGCAGCCGTCAGCTTGTCAACTCCGCATCTGCTGGCTGCCTCGGC	284618	RUSC1 antisense RNA 1	NM_001039517	5.08973	5.28046	5.11586	4.59867	0.876165	1.43117
A_22_P00001667	2	RALY	Homo sapiens RALY heterogeneous nuclear ribonucleoprotein (RALY), transcript variant 1, mRNA [NM_016732]	TCCCCATATATTTGCTTGCCATGGACCCTGGGCAGCAGGGAGAGAGTAGAGATTTGTCAA	22913	RALY heterogeneous nuclear ribonucleoprotein	NM_016732	2.51651	4.09122	3.96411	1.96071	0.335711	4.00944
A_22_P00001741	16	C11orf95	Homo sapiens chromosome 11 open reading frame 95 (C11orf95), mRNA [NM_001144936]	AGCAACAGCTGGGATGCACACCTGGGGCTGGGGGCCTGCGGAGAGGCCGAGGGCCTGGGG	65998	chromosome 11 open reading frame 95	NM_001144936	6.65479	6.73097	5.97793	5.92079	0.948564	1.0404
A_22_P00001742	1	C11orf95	Homo sapiens chromosome 11 open reading frame 95 (C11orf95), mRNA [NM_001144936]	GCCGACGGCTGCCGCCCGCCGGATCGAGCGGCAGCGCGGAGCCAGAGGAAGACGAAGGCG	65998	chromosome 11 open reading frame 95	NM_001144936	3.00454	4.05858	2.74999	2.94052	0.481616	0.876288
A_22_P00001744	16	CENPN	Homo sapiens centromere protein N (CENPN), transcript variant 2, mRNA [NM_001100624]	AGCTGAATCTGTCTCCCAAATTGCAATTCCTAAGACCTCAATAAAAACACCTTGTCTTGC	55839	centromere protein N	NM_001100624	8.11783	9.11733	9.25529	8.44973	0.500174	1.74782
A_22_P00001818	2	LOC101929372	Homo sapiens uncharacterized LOC101929372 (LOC101929372), mRNA [NM_001288707]	CTTGGGACGATAAAGAGAACTGTAAACTTAATTTTGTAGTTAGAGAAGATGAACCCAAAC	101929372	uncharacterized LOC101929372	NM_001288707	1.83767	3.62712	2.80815	5.54372	0.289282	0.150145
A_22_P00001823	11	LOC100130705	Homo sapiens uncharacterized LOC100130705 (LOC100130705), mRNA [NM_001195150]	AAGATGTGCCGCATTGAGTCATTCTTCCGCAAGAACGGGGCCTTCGCACTGCTTGATCCC	100130705	uncharacterized LOC100130705	NM_001195150	4.43872	4.85001	4.41979	4.25274	0.75195	1.12276
A_22_P00001843	16	ATXN3	Homo sapiens ataxin 3 (ATXN3), transcript variant reference, mRNA [NM_004993]	AAGCCGGGCTTCCAAAGCACTGTTGAACACAGGATTCTGTTGTTAGTGTGGATGTTCAAT	4287	ataxin 3	NM_004993	10.7953	11.0573	10.295	10.1526	0.83394	1.10378
A_22_P00001912	16	PRIM2	Homo sapiens primase, DNA, polypeptide 2 (58kDa) (PRIM2), transcript variant 1, mRNA [NM_000947]	AGCCAAGATTACAGTACCCAGGGAAATGTTGGGAAGATTTCTTTAGATCAGATTGATTTG	5558	primase, DNA, polypeptide 2 (58kDa)	NM_000947	5.66851	6.0655	6.19958	5.60254	0.759442	1.5126
A_22_P00001971	14	SOX5	Homo sapiens SRY (sex determining region Y)-box 5 (SOX5), transcript variant 4, mRNA [NM_001261414]	TTGGTGACCCAAAGATGATGAAAAATATGTTCCTGCCCACAAGGAGTTAGCGACCTACTG	6660	SRY (sex determining region Y)-box 5	NM_001261414	3.53715	4.96757	7.65765	8.23721	0.371024	0.669167
A_22_P00001972	12	SOX5	Homo sapiens SRY (sex determining region Y)-box 5 (SOX5), transcript variant 4, mRNA [NM_001261414]	TGTTGACAAGATTCTGAAAGCTGAACAGAGAATTCTGGCACTGCACTGGGTAGGAAAAAG	6660	SRY (sex determining region Y)-box 5	NM_001261414	2.34858	3.38071	10.3764	10.5633	0.488985	0.878447
A_22_P00002044	16	SCAMP1	Homo sapiens secretory carrier membrane protein 1 (SCAMP1), transcript variant 1, mRNA [NM_004866]	ACACAGTACAGACAGCATGGATATTTCCTGTTCACTTGTGCATGGGCTAAAACCAGGAAA	9522	secretory carrier membrane protein 1	NM_004866	8.66083	8.3957	8.16641	8.25845	1.20174	0.93819
A_22_P00002045	16	SCAMP1	Homo sapiens secretory carrier membrane protein 1 (SCAMP1), transcript variant 1, mRNA [NM_004866]	ACACAACCAGCAATAATGAAACCAACAGAGGAACATCCAGCTTATACACAGATTGCAAAG	9522	secretory carrier membrane protein 1	NM_004866	8.81289	8.6777	8.43942	8.57335	1.09824	0.911342
A_22_P00002166	16	FAM229A	Homo sapiens family with sequence similarity 229, member A (FAM229A), mRNA [NM_001167676]	CGCCGCCCCCGAGTCCCAGGACAGCCCGGAGGCGGTAGCGACGGAGCACAACCCGGTCAG	100128071	family with sequence similarity 229, member A	NM_001167676	12.0229	12.0487	11.1215	11.5797	0.982266	0.727934
A_22_P00002297	16	TMEM258	Homo sapiens transmembrane protein 258 (TMEM258), mRNA [NM_014206]	GAACCCAGCTGTCTTCCCCCATCTGACCGTGGTGCTTTTGGCCATTGGCATGTTCTTCAC	746	transmembrane protein 258	NM_014206	13.3356	13.4305	13.2092	13.6465	0.936365	0.738516
A_22_P00002410	16	VASH1	Homo sapiens vasohibin 1 (VASH1), mRNA [NM_014909]	TTTATTTTTAACTGTTTCTCATATGTAGCAACCCCTCCTCCCCTCCTGGGCATGTTTACA	22846	vasohibin 1	NM_014909	11.7646	11.9208	11.5412	11.6131	0.897377	0.951391
A_22_P00002490	16	C16orf46	Homo sapiens chromosome 16 open reading frame 46 (C16orf46), transcript variant 1, mRNA [NM_001100873]	CCCGGCCCCCAAAAAGAGGTTATATGCAGAGGTAATATAATATATGTACTTTTGAAAATA	123775	chromosome 16 open reading frame 46	NM_001100873	7.8388	7.67002	8.61576	9.24865	1.12411	0.644884
A_22_P00002539	16	PLSCR3	Homo sapiens phospholipid scramblase 3 (PLSCR3), transcript variant 1, mRNA [NM_020360]	GAGTTTGCCTCCGCTTCCAGAACTAAGCCACCCAGACACCATCATCTCGAAAACCCCAGC	57048	phospholipid scramblase 3	NM_020360	5.47894	4.97802	4.56347	4.91007	1.41512	0.786434
A_22_P00002552	16	MGC57346-CRHR1	Homo sapiens MGC57346-CRHR1 readthrough (MGC57346-CRHR1), transcript variant 6, mRNA [NM_001303016]	TCTCTGCCTCCCTCCAGGACCAGCACTGCGAGAGCCTGTCCCTGGCCAGCAACATCTCAG	104909134	MGC57346-CRHR1 readthrough	NM_001303016	8.62221	8.44449	8.14333	8.12935	1.1311	1.00973
A_22_P00002567	16	C17orf85	Homo sapiens chromosome 17 open reading frame 85 (C17orf85), mRNA [NM_001114118]	GTCCAGGAAGATTGTTCTTGCATAACCAGACCCACAATAAATATCTACAACTTTTCTTAC	55421	chromosome 17 open reading frame 85	NM_001114118	10.1308	10.6382	9.16167	9.18821	0.703456	0.981771
A_22_P00002573	1	LOC100506388	Homo sapiens uncharacterized LOC100506388 (LOC100506388), transcript variant 1, mRNA [NM_001242780]	CTGAAAACTCCAGAGAGCAGTGCCCTGTGCATTAAACACAGACTGCGCCCTTGTACTCAG	100506388	uncharacterized LOC100506388	NM_001242780	2.04193	2.04579	4.60439	2.02032	0.997332	5.99629
A_22_P00002740	16	C21orf2	Homo sapiens chromosome 21 open reading frame 2 (C21orf2), transcript variant 3, mRNA [NM_001271441]	TGTCTGCCTCCTTGGGACTGTGGAGTGGGTGCCCTCAGTAAAGCGCTTTGTTGGAATGGT	755	chromosome 21 open reading frame 2	NM_001271441	9.5233	9.76543	9.46713	9.51829	0.845492	0.965157
A_22_P00002896	1	APELA	Homo sapiens apelin receptor early endogenous ligand (APELA), mRNA [NM_001297550]	AGAAAACTGCGCAAACACAATTGCCTTCAGAGGAGATGTATGCCTCTCCATTCACGAGTA	100506013	apelin receptor early endogenous ligand	NM_001297550	1.96751	3.75989	2.56267	1.95442	0.288697	1.52441
A_22_P00003173	16	C9orf69	Homo sapiens chromosome 9 open reading frame 69 (C9orf69), transcript variant 2, mRNA [NM_001256526]	AAGAAAGCCTGGGAGATCGAGGCTTCAGTGAGCCAGGATGGAAACGCGTGTCCCAAGTGT	90120	chromosome 9 open reading frame 69	NM_001256526	9.45918	9.92912	9.57211	9.56071	0.721995	1.00793
A_22_P00003197	16	PDP2	Homo sapiens pyruvate dehyrogenase phosphatase catalytic subunit 2 (PDP2), mRNA [NM_020786]	TCCAGGCATATCTGGTTTTTCTCTGCCTAATAGATTTTCCTGCTTTCTAGTTAGTAATAT	57546	pyruvate dehyrogenase phosphatase catalytic subunit 2	NM_020786	7.37844	6.72583	7.5603	8.04751	1.57202	0.713405
A_22_P00003198	16	PDP2	Homo sapiens pyruvate dehyrogenase phosphatase catalytic subunit 2 (PDP2), mRNA [NM_020786]	GTGCTTAAAATTGTATATGATTTTAGGTAAGAAACTTTGATAATATTGGCATAATTTAGA	57546	pyruvate dehyrogenase phosphatase catalytic subunit 2	NM_020786	4.79551	4.76973	5.76031	6.54378	1.01803	0.580967
A_22_P00003226	1	CACNG2	Homo sapiens calcium channel, voltage-dependent, gamma subunit 2 (CACNG2), mRNA [NM_006078]	TCCAGCTCAGACCAGTTCAAGAAACTAACCTCCATTTATTTTCTTGGTGAGTCCTTTTTT	10369	calcium channel, voltage-dependent, gamma subunit 2	NM_006078	1.78352	1.77835	1.77607	1.77979	1.00359	0.997429
A_22_P00003284	16	MIR205HG	Homo sapiens MIR205 host gene (non-protein coding) (MIR205HG), mRNA [NM_001104548]	ATTAAAGAGAGAAATCAACTATTCAGGACCGGCCCCCACCTTTCCTCAGGAGTCATTTCT	642587	MIR205 host gene (non-protein coding)	NM_001104548	8.45352	8.67848	8.46511	8.71448	0.855618	0.841264
A_22_P00003291	16	NDST2	Homo sapiens N-deacetylase/N-sulfotransferase (heparan glucosaminyl) 2 (NDST2), mRNA [NM_003635]	CCCCGGTGGGAGCGGTGGTTGGGCCAGGCTGCGGCAGAGCGTTCGCTCGGAGATGGCGGA	8509	N-deacetylase/N-sulfotransferase (heparan glucosaminyl) 2	NM_003635	5.72993	5.57935	5.73902	5.59643	1.11002	1.10389
A_22_P00003337	3	C5orf66	Homo sapiens chromosome 5 open reading frame 66 (C5orf66), mRNA [NM_001277348]	AAGAGGGGCTGTCAGTCCAACCCTCCAGCTGTAGGCTCGTGCATCTGCCAGTCTCTTGGC	100996485	chromosome 5 open reading frame 66	NM_001277348	4.23919	2.89989	3.10706	3.65355	2.5303	0.684683
A_22_P00003338	16	C5orf66	Homo sapiens chromosome 5 open reading frame 66 (C5orf66), mRNA [NM_001277348]	ATAGTTCAGACAAGGCCTCTGTGCTGTGATGGAACCAGGTGACCCGCAGCCTCCGGGCCA	100996485	chromosome 5 open reading frame 66	NM_001277348	7.95564	7.18138	7.43693	7.80621	1.71031	0.774164
A_22_P00003355	1	NETO1	Homo sapiens neuropilin (NRP) and tolloid (TLL)-like 1 (NETO1), transcript variant 3, mRNA [NM_138966]	TGCCCTCTCTTAATAGTCACAGATACTGACACAAAACTTAAAAATGACCAGAAAACAATG	81832	neuropilin (NRP) and tolloid (TLL)-like 1	NM_138966	2.00162	1.98711	1.96334	2.03844	1.01011	0.949274
A_22_P00003781	16	CDK3	Homo sapiens cyclin-dependent kinase 3 (CDK3), mRNA [NM_001258]	ACCTGAAGCCCCAGAACCTGCTCATCAATGAGTTGGGTGCCATCAAGCTGGCTGACTTCG	1018	cyclin-dependent kinase 3	NM_001258	7.51302	6.83221	7.72266	7.95734	1.60304	0.849874
A_22_P00003783	7	ATG9B	Homo sapiens autophagy related 9B (ATG9B), transcript variant 1, mRNA [NM_173681]	AAGGCCCGGAATCTGTTCCCCGGAGGGTTTCAGGTGACCACAGACACCCAGAAGGAGCCT	285973	autophagy related 9B	NM_173681	3.19455	2.91065	3.0178	3.89111	1.21748	0.545893
A_22_P00003785	10	ATG9B	Homo sapiens autophagy related 9B (ATG9B), transcript variant 1, mRNA [NM_173681]	GGGTCGAACGCCCAGGGCACTGCGCCCCGCAACTGACGCTCCTGCAAGGAAAAGCTCTGG	285973	autophagy related 9B	NM_173681	3.69549	4.53716	4.02637	4.58017	0.557997	0.681227
A_22_P00003786	16	ATG9B	Homo sapiens autophagy related 9B (ATG9B), transcript variant 1, mRNA [NM_173681]	TAGATTGTGTGACTCCCTTCAGGCAGTCCTTTAGTCCCCAGCCTCACCTTTGCTCTCAAT	285973	autophagy related 9B	NM_173681	6.82555	6.72055	6.53177	6.64115	1.07549	0.926984
A_22_P00003842	16	LOC100129083	Homo sapiens uncharacterized LOC100129083 (LOC100129083), mRNA [NM_001256795]	TTGAACCAGTAGCCATAAGCTGGGGTAGACCCTGTCCAGTCCTGTCGGGGGTAGGAGAAA	100129083	uncharacterized LOC100129083	NM_001256795	5.63177	5.34373	4.89291	5.32496	1.22098	0.741208
A_22_P00003871	16	CELF6	Homo sapiens CUGBP, Elav-like family member 6 (CELF6), transcript variant 2, mRNA [NM_001172684]	AGACCAATGGCCAGCCGGGCTCCGACACGCTCTACAATAACGGGCTCTCCCCTTATCCAG	60677	CUGBP, Elav-like family member 6	NM_001172684	4.91076	5.38133	5.70438	4.84804	0.72168	1.81044
A_22_P00003889	16	ZNF608	Homo sapiens zinc finger protein 608 (ZNF608), mRNA [NM_020747]	AACAGCTTTTGGTTCGGACTCGTTCTGTGGGTGTCAATACATGTGAAGTTGGAGTAGTGA	57507	zinc finger protein 608	NM_020747	8.45821	8.48244	6.99759	7.84713	0.983346	0.554961
A_22_P00003920	16	CES2	Homo sapiens carboxylesterase 2 (CES2), transcript variant 1, mRNA [NM_003869]	AAATTCACTGAGGAAGAGGAGCAGCTAAGCAGGAAGATGATGAAGTACTGGGCCAACTTT	8824	carboxylesterase 2	NM_003869	7.1697	6.91838	7.07544	7.56275	1.1903	0.713354
A_22_P00003932	16	CFLAR	Homo sapiens CASP8 and FADD-like apoptosis regulator (CFLAR), transcript variant 8, mRNA [NM_001202519]	GAAGAGACAGTTTTCAGGAACAACAAGCAATTATTCCTACTTTCCAAGTTATTTTGATGC	8837	CASP8 and FADD-like apoptosis regulator	NM_001202519	7.7591	8.11607	7.86459	6.7155	0.780805	2.21775
A_22_P00004279	16	ALG14	Homo sapiens ALG14, UDP-N-acetylglucosaminyltransferase subunit (ALG14), mRNA [NM_144988]	ACCACCTTGCACTCCATGTGGCTCTCCTTTCCCCTAATTCACAGGGTGAAGCCAGATTTG	199857	ALG14, UDP-N-acetylglucosaminyltransferase subunit	NM_144988	8.81663	8.39359	7.37935	7.63088	1.34075	0.840005
A_22_P00004331	3	USP31	Homo sapiens ubiquitin specific peptidase 31 (USP31), mRNA [NM_020718]	TACTGATATCAAACTCCCATTTGAAATACAAGGGCCCTTCTGATTCAAGGCCCAGTTGGG	57478	ubiquitin specific peptidase 31	NM_020718	2.20647	2.14867	4.10664	2.34794	1.04088	3.38395
A_22_P00004694	16	RECQL4	Homo sapiens RecQ protein-like 4 (RECQL4), mRNA [NM_004260]	ACGGGCCAGGCCGGCGGCGGGCTCCGCAGCTCCGAGTCGCTCCCCGCGGCGGCCGAAGAG	9401	RecQ protein-like 4	NM_004260	6.77518	7.28287	7.00182	7.0957	0.703349	0.936997
A_22_P00004695	16	RECQL4	Homo sapiens RecQ protein-like 4 (RECQL4), mRNA [NM_004260]	AGAAAATACCTGCACCTGAGCTTCCATGCCCTGGTGGGCCTGGCCACGGAAGAGCTCCTG	9401	RecQ protein-like 4	NM_004260	9.14922	9.10464	9.2304	8.61015	1.03138	1.53714
A_22_P00004696	5	RECQL4	Homo sapiens RecQ protein-like 4 (RECQL4), mRNA [NM_004260]	AAGGCGGCCTGCATACACTCGGGCATGACCAGGAAGCAACGGGAATCTGTCCTGCAGAAG	9401	RecQ protein-like 4	NM_004260	3.14269	3.78865	3.48332	3.15887	0.639068	1.25219
A_22_P00004999	16	DCUN1D5	Homo sapiens DCN1, defective in cullin neddylation 1, domain containing 5 (DCUN1D5), mRNA [NM_032299]	GCTTTTATTTCACCAGTACTCAGAACTATCCACAGTATAGAAAAGCACTCAATAAATGGA	84259	DCN1, defective in cullin neddylation 1, domain containing 5	NM_032299	7.86299	7.20022	8.06976	6.87525	1.58312	2.28867
A_22_P00005014	15	LOC643355	Homo sapiens uncharacterized LOC643355 (LOC643355), mRNA [NM_001270945]	TAGACCGGGAGTCTGGACTTGGGAGCGTGAACTCTCACCCGAGCCGGTCCCCTTACAACT	643355	uncharacterized LOC643355	NM_001270945	4.88968	4.85107	4.52035	4.90904	1.02712	0.763822
A_22_P00005046	4	XKR5	Homo sapiens XK, Kell blood group complex subunit-related family, member 5 (XKR5), transcript variant 1, mRNA [NM_207411]	AGATGCACGCGAGGCTCCTGGGGCTCTCGGCCCTGCTGCAGGCGGCCGAGCAGAGCGCGC	389610	XK, Kell blood group complex subunit-related family, member 5	NM_207411	4.35917	3.73471	2.48141	4.39092	1.54163	0.266184
A_22_P00005087	16	DGAT1	Homo sapiens diacylglycerol O-acyltransferase 1 (DGAT1), mRNA [NM_012079]	ATCTCTGTGGAGCGGGGAACGGGACAGTTGTGTAAAAATCCAAAATACAATTCTGACTAT	8694	diacylglycerol O-acyltransferase 1	NM_012079	7.63884	8.06901	8.05812	7.21699	0.742175	1.79146
A_22_P00005330	16	KANK1	Homo sapiens KN motif and ankyrin repeat domains 1 (KANK1), transcript variant 4, mRNA [NM_001256877]	GGGGTCCCGTTCATGTTAAGCAGTTTTCCTTCCTTCAAAATAAAAAACTAGCAGTCCTTA	23189	KN motif and ankyrin repeat domains 1	NM_001256877	10.7994	10.9478	11.5655	11.4059	0.902241	1.117
A_22_P00005359	16	DPYS	Homo sapiens dihydropyrimidinase (DPYS), mRNA [NM_001385]	ACAAAAGAAGATGCCACAGCAGGGACCAGGAAACAGGCCCACCCCTGAAGTGTGTGCCAT	1807	dihydropyrimidinase	NM_001385	5.36155	5.31227	4.88173	5.48936	1.03475	0.656276
A_22_P00005497	12	DYX1C1	Homo sapiens dyslexia susceptibility 1 candidate 1 (DYX1C1), transcript variant 3, mRNA [NM_001033560]	ACACCATTGTCTTCACCTTGTATAAAAAAGAAGCGGCCATGTGGGAGACCCTTTCTGTGA	161582	dyslexia susceptibility 1 candidate 1	NM_001033560	1.74053	1.73127	9.38832	8.10759	1.00644	2.42962
A_22_P00005678	16	EIF4ENIF1	Homo sapiens eukaryotic translation initiation factor 4E nuclear import factor 1 (EIF4ENIF1), transcript variant 1, mRNA [NM_019843]	AGGCAGACTCAACTAAGCCCGGACCTGTGGTGGCACACTGGGCAGGACCCTGCTTCATCT	56478	eukaryotic translation initiation factor 4E nuclear import factor 1	NM_019843	9.12388	9.22622	8.96266	8.53775	0.931525	1.34249
A_22_P00005712	3	C6orf7	Homo sapiens chromosome 6 open reading frame 7 (C6orf7), mRNA [NM_001243308]	CAGAAGATTCCCTGATCCAATCTTTCCTTGGCACAAACTTTTAGTTATTGTGTTTACATA	89758	chromosome 6 open reading frame 7	NM_001243308	1.7015	1.70603	1.67624	1.68439	0.996869	0.994367
A_22_P00006200	13	STRIP1	Homo sapiens striatin interacting protein 1 (STRIP1), transcript variant 1, mRNA [NM_033088]	AAACAAGCCATGATGCAGCTCTATGTGCTGAAGCTGCTCAAGGTACAGACCAAATACTTG	85369	striatin interacting protein 1	NM_033088	3.68911	5.03437	4.87258	4.75293	0.393585	1.08647
A_22_P00006201	5	SMKR1	Homo sapiens small lysine-rich protein 1 (SMKR1), mRNA [NM_001195243]	TGGAAGATCAGGAAATGCACCTTACTTCCTCTGTTATGCCAGATATGGTTAGCCACTTTG	100287482	small lysine-rich protein 1	NM_001195243	6.277	3.95341	1.66605	1.64897	5.00577	1.01191
A_22_P00006254	12	FAM65B	Homo sapiens family with sequence similarity 65, member B (FAM65B), transcript variant 4, mRNA [NM_001286446]	ACTTAACTTCCAGGATAGCTGCAAGACCCTTTTGTTCCTTTGCCATGAGCAGGTTTTAGG	9750	family with sequence similarity 65, member B	NM_001286446	2.6108	2.51455	7.96636	8.10269	1.06899	0.909832
A_22_P00006710	16	HGC6.3	Homo sapiens uncharacterized LOC100128124 (HGC6.3), mRNA [NM_001129895]	TGCCTTCTTCTCCTCCCCCAACACTGCAGGGGGAATGACCCCCACTGCCTCCTCCTCCCA	100128124	uncharacterized LOC100128124	NM_001129895	11.1187	11.2916	10.6187	10.9996	0.887059	0.767944
A_22_P00006736	1	SLC44A1	Homo sapiens solute carrier family 44 (choline transporter), member 1 (SLC44A1), transcript variant 1, mRNA [NM_080546]	GCCACTAGAAAATGTGAGCTCCTTCTTCATTTACCATGTTGATAATCCGGTGGTGACTTT	23446	solute carrier family 44 (choline transporter), member 1	NM_080546	2.0227	2.01007	2.34023	2.03529	1.0088	1.23536
A_22_P00006743	4	FSIP1	Homo sapiens fibrous sheath interacting protein 1 (FSIP1), mRNA [NM_152597]	AATTCAAGAATACGCCCTGGGAGCAGAAGTTCAAATGCTTCTTTGGAGGTGCTCTCAACA	161835	fibrous sheath interacting protein 1	NM_152597	4.20663	3.53065	4.05181	2.37629	1.59769	3.19436
A_22_P00006779	16	FXR1	Homo sapiens fragile X mental retardation, autosomal homolog 1 (FXR1), transcript variant 3, mRNA [NM_001013439]	TTCCCTTTTTAGAGTTAATGCTTCATTGCCTGTCGGCATATTATCACTATCTGTCTTTGA	8087	fragile X mental retardation, autosomal homolog 1	NM_001013439	6.78529	6.57764	5.82637	5.3916	1.15481	1.3517
A_22_P00007033	16	CASP8AP2	Homo sapiens caspase 8 associated protein 2 (CASP8AP2), transcript variant 1, mRNA [NM_012115]	CAAAACTGCCAGAGTGGAAATAAACCGCAAGGATGAAGAAATAAGTAATCTTCACCAAAG	9994	caspase 8 associated protein 2	NM_012115	7.53768	7.38838	7.75493	8.22709	1.10903	0.720884
A_22_P00007124	1	HELZ2	Homo sapiens helicase with zinc finger 2, transcriptional coactivator (HELZ2), transcript variant 1, mRNA [NM_001037335]	CTCCCTGGAGGTCATCCGGAGGCCTGAAACCAAGGTGCTCATCTGCACACACACCAACAG	85441	helicase with zinc finger 2, transcriptional coactivator	NM_001037335	1.77874	1.75693	3.24138	1.92125	1.01523	2.49687
A_22_P00007150	16	SLC38A3	Homo sapiens solute carrier family 38, member 3 (SLC38A3), mRNA [NM_006841]	GAGCAGAGCGAACCGCACCGGCCCGAGCGGAGCGCCGCACGTTCCCAACCGCGAGGCCAG	10991	solute carrier family 38, member 3	NM_006841	9.3635	9.67586	8.65945	8.87414	0.805326	0.861733
A_22_P00007151	2	SLC38A3	Homo sapiens solute carrier family 38, member 3 (SLC38A3), mRNA [NM_006841]	AAGAAGAAGATGCAGCACATCTCCAACCTGTCCATCGCTGTCATGTACATCATGTACTTC	10991	solute carrier family 38, member 3	NM_006841	3.41274	2.7258	3.36127	2.92212	1.60986	1.3558
A_22_P00007182	2	GOLGA7B	Homo sapiens golgin A7 family, member B (GOLGA7B), mRNA [NM_001010917]	ACAGATATTTATCCAAGGGTTCACTGATTCCCGAATAAATGCCAGGAACATTCATGTACA	401647	golgin A7 family, member B	NM_001010917	2.38378	2.67742	1.9359	6.91262	0.815837	0.0317582
A_22_P00007285	11	SLC45A4	Homo sapiens solute carrier family 45, member 4 (SLC45A4), transcript variant 1, mRNA [NM_001286646]	GTAAGTGTTACCTGCCCGAGGAACACAGCAGAAGCAGAAAGAGAAGACGTCTTAATTTAT	57210	solute carrier family 45, member 4	NM_001286646	2.69208	2.45997	4.51334	5.47894	1.17455	0.512065
A_22_P00007343	11	NEURL4	Homo sapiens neuralized E3 ubiquitin protein ligase 4 (NEURL4), transcript variant 1, mRNA [NM_032442]	AAGAAGTGGCACATGGCATATCACGGGAGCAATGTTGCCGCTGTACGGAGAGTGCTGGAC	84461	neuralized E3 ubiquitin protein ligase 4	NM_032442	4.21756	4.45839	4.73967	4.10161	0.846255	1.55623
A_22_P00007344	7	NEURL4	Homo sapiens neuralized E3 ubiquitin protein ligase 4 (NEURL4), transcript variant 2, mRNA [NM_001005408]	AATCCTGACCAATGGCAAGGGCACCCGCCGGGAGTACTGCGAATTCAGTCTGGATGAGTT	84461	neuralized E3 ubiquitin protein ligase 4	NM_001005408	4.69236	4.213	3.81194	4.4933	1.39413	0.623577
A_22_P00007424	16	UBXN8	Homo sapiens UBX domain protein 8 (UBXN8), transcript variant 1, mRNA [NM_005671]	AGCAGCAAAGAGCCAGAACTTGCCTAAACCTTTAACTGAATTTCCGTCTCCTGCTGAACA	7993	UBX domain protein 8	NM_005671	8.4785	8.83024	6.5389	5.92815	0.783636	1.52705
A_22_P00007426	16	UBXN8	Homo sapiens UBX domain protein 8 (UBXN8), transcript variant 3, mRNA [NM_001282199]	CTATTTCTGTGACTACCTCATGGCTTAACTCATTTAAATCTCCCCAAGTTTATCTGAAGG	7993	UBX domain protein 8	NM_001282199	8.17245	8.44125	5.81733	5.26983	0.830007	1.46155
A_22_P00007720	16	HLA-DQB1	Homo sapiens major histocompatibility complex, class II, DQ beta 1 (HLA-DQB1), transcript variant 2, mRNA [NM_001243961]	CAGACTGCTCAAGAGAAGCACATGAAAAACATTACCTGACTTTAGAGCTTTTTTACATAA	3119	major histocompatibility complex, class II, DQ beta 1	NM_001243961	13.9713	14.4247	12.1263	12.0989	0.730351	1.01919
A_22_P00007734	16	VPS11	Homo sapiens vacuolar protein sorting 11 homolog (S. cerevisiae) (VPS11), transcript variant 2, mRNA [NM_001290185]	CTGCTCCTCAACTGCTATACCAAGCTCAAGGACAGCTCGAAGCTGGAGGAGTTCATCAAG	55823	vacuolar protein sorting 11 homolog (S. cerevisiae)	NM_001290185	5.35315	5.87072	5.53564	4.8375	0.698548	1.62242
A_22_P00007735	16	VPS11	Homo sapiens vacuolar protein sorting 11 homolog (S. cerevisiae) (VPS11), transcript variant 2, mRNA [NM_001290185]	GTATGGAGACCATCTCTACAGCAAGGGCAACCACGATGGGGCTGTCCAGCAATATATCCG	55823	vacuolar protein sorting 11 homolog (S. cerevisiae)	NM_001290185	5.8545	5.97772	5.68093	5.45736	0.918137	1.16761
A_22_P00007770	9	SPOPL	Homo sapiens speckle-type POZ protein-like (SPOPL), mRNA [NM_001001664]	TAAGAGTATTATGGGAAGTAGAAATTCACTTCCTTAAATCCATCGTAAGATTGAGCCTCA	339745	speckle-type POZ protein-like	NM_001001664	4.23304	5.18412	3.38434	4.00797	0.517247	0.649037
A_22_P00007883	16	HSD17B11	Homo sapiens hydroxysteroid (17-beta) dehydrogenase 11 (HSD17B11), mRNA [NM_016245]	GCATGGGATTCTGACTGAGCAGAAGATGATTTTTATTCCATCTTCTATAGCTTTTTTAAC	51170	hydroxysteroid (17-beta) dehydrogenase 11	NM_016245	9.16727	9.96143	9.53255	9.96237	0.576679	0.742358
A_22_P00007891	4	PKIB	Homo sapiens protein kinase (cAMP-dependent, catalytic) inhibitor beta (PKIB), transcript variant 4, mRNA [NM_001270393]	CTCTGAAATTAATTTGATTTTGAGATTTGAGAACTTGGACATACATACTTCCTATGGAAG	5570	protein kinase (cAMP-dependent, catalytic) inhibitor beta	NM_001270393	3.73874	2.44223	4.69462	2.6146	2.45635	4.22814
A_22_P00007978	16	IDS	Homo sapiens iduronate 2-sulfatase (IDS), transcript variant 1, mRNA [NM_000202]	AACTTGTGTCTCTTTTTCCCACGCTGGCTGGACTTGCAGGACTGCAGGTTCCACCTCGCT	3423	iduronate 2-sulfatase	NM_000202	9.55324	9.31689	9.26439	9.13173	1.17801	1.09631
A_22_P00007979	16	IDS	Homo sapiens iduronate 2-sulfatase (IDS), transcript variant 2, mRNA [NM_006123]	ATGTTCCCGAGGGCACCTTGCCTGACAAACAGAGCACTGAGCAAGCCATACAGTTGTTGG	3423	iduronate 2-sulfatase	NM_006123	9.82259	9.29872	9.40376	9.33572	1.4378	1.0483
A_22_P00008114	16	MYOM3	Homo sapiens myomesin 3 (MYOM3), mRNA [NM_152372]	GCATTTCTCTGCCCCCCAACTTTTTTCTTTTTAAAAATAAGATGGGGAGTGTTCATAAAA	127294	myomesin 3	NM_152372	6.2692	5.43917	5.10182	5.48159	1.77772	0.768561
A_22_P00008337	16	ITPR2	Homo sapiens inositol 1,4,5-trisphosphate receptor, type 2 (ITPR2), mRNA [NM_002223]	CACTTTTCAGAACATCAAATTCCTAATGAAGAAGAGGAGAAGATAATGGGGAAATTTGAC	3709	inositol 1,4,5-trisphosphate receptor, type 2	NM_002223	9.29741	8.61968	7.44693	9.68464	1.59963	0.212022
A_22_P00008365	15	JAG2	Homo sapiens jagged 2 (JAG2), transcript variant 2, mRNA [NM_145159]	ACGAGAACTACTACAGCGCCACTTGCAACAAGTTCTGCCGGCCCCGCAACGACTTTTTCG	3714	jagged 2	NM_145159	5.18205	5.27235	4.66425	4.9068	0.939325	0.845251
A_22_P00008435	1	FLJ45513	Homo sapiens uncharacterized LOC729220 (FLJ45513), mRNA [NM_001242791]	AAAGTCTCTTTGGGGATTTGGACCCATTTCTGAAAAGCTCATGAAAACCACTTTGCCTTG	729220	uncharacterized LOC729220	NM_001242791	1.76111	1.75365	2.38317	1.77525	1.00518	1.52406
A_22_P00008538	3	KCNK15	Homo sapiens potassium channel, two pore domain subfamily K, member 15 (KCNK15), mRNA [NM_022358]	ACTTTAATTTCAACATGAGCTACATGGTCATGAACACAATGCAACGCGACCCCACTCCAA	60598	potassium channel, two pore domain subfamily K, member 15	NM_022358	4.82589	4.89638	3.42316	3.9268	0.952315	0.705325
A_22_P00008561	16	KCNN3	Homo sapiens potassium channel, calcium activated intermediate/small conductance subfamily N alpha, member 3 (KCNN3), transcript variant 3, mRNA [NM_001204087]	ACTCCAACCTGCAGTTAGGATCCCAAAGAGATGTTGACATTTATAGCCAAAAAGAAAAAG	3782	potassium channel, calcium activated intermediate/small conductance subfamily N alpha, member 3	NM_001204087	10.1864	8.85947	12.2815	12.3981	2.50872	0.922336
A_22_P00008601	12	KDM4C	Homo sapiens lysine (K)-specific demethylase 4C (KDM4C), transcript variant 4, mRNA [NM_001146696]	TGGAGTGTTCTGCATTCATGTGGAAGAGGCTAAAGGATGTTTGATGAAGCACTATGGGCT	23081	lysine (K)-specific demethylase 4C	NM_001146696	7.61849	7.99247	4.63706	2.17885	0.771651	5.49536
A_22_P00008868	1	LOC730159	Homo sapiens uncharacterized LOC730159 (LOC730159), mRNA [NM_001195190]	CCTTCCTCTAAGAAAATTAAGCACTGCAAATTAAAGAAGAAGAGTAAAGAAGAAGGAGCC	730159	uncharacterized LOC730159	NM_001195190	1.83734	1.80704	1.81827	5.31616	1.02122	0.0885179
A_22_P00008936	1	C12orf80	Homo sapiens chromosome 12 open reading frame 80 (C12orf80), mRNA [NM_001242696]	GGCTCAAGGCCACACCACATTTCCATGTCATTTTCCAGTGGCACCAACTGAGCTGGACAG	283403	chromosome 12 open reading frame 80	NM_001242696	1.98409	1.98608	1.96168	1.98655	0.998618	0.982913
A_22_P00008937	16	C12orf80	Homo sapiens chromosome 12 open reading frame 80 (C12orf80), mRNA [NM_001242696]	TGCATGTGAGCCCTGCCCTTGGGAAGCTTCCAGGTTGGGAAATGAGGAATGAGCCTGACA	283403	chromosome 12 open reading frame 80	NM_001242696	7.3445	7.55375	7.05468	7.5988	0.864986	0.685809
A_22_P00008943	16	KRT81	Homo sapiens keratin 81, type II (KRT81), mRNA [NM_002281]	CCTGCCTCTCCCCTTCCTCCTCTGCTCTTGATCTGTGTTTCAATAAATTAATGTAGCCAA	3887	keratin 81, type II	NM_002281	13.6882	13.7553	13.6772	14.0453	0.954533	0.774789
A_22_P00009162	16	LMO7	Homo sapiens LIM domain 7 (LMO7), transcript variant 1, mRNA [NM_005358]	AAATTTGGAGGCAACTGATATGTGCTCATGTCTGCATCTGTGTGGGTTGGCTGTATCTCA	4008	LIM domain 7	NM_005358	8.76191	8.37506	7.98973	7.92717	1.30753	1.04432
A_22_P00009265	16	LRPAP1	Homo sapiens low density lipoprotein receptor-related protein associated protein 1 (LRPAP1), transcript variant 1, mRNA [NM_002337]	TTTCAGTGTGATGGTTCATCTAGGTACCCTAGCCTGTCATTGCTGGAGTTGGAAATCTCT	4043	low density lipoprotein receptor-related protein associated protein 1	NM_002337	7.20571	6.83366	8.67521	8.14977	1.29419	1.43938
A_22_P00009281	16	LRRC26	Homo sapiens leucine rich repeat containing 26 (LRRC26), mRNA [NM_001013653]	CCCCACGGCTGTGCCTCGCCCGCGGACCCGGGGAGCCCCGCCGCTGCCGCCCAAGCCTGA	389816	leucine rich repeat containing 26	NM_001013653	14.9091	15.0725	14.716	14.797	0.892942	0.945396
A_22_P00009337	16	LRRC8B	Homo sapiens leucine rich repeat containing 8 family, member B (LRRC8B), transcript variant 1, mRNA [NM_015350]	GTGCTGTGGTGCACTGCAGTGATGTATTTGCATAACATTGTTTGATAGTGAAAAATTTTT	23507	leucine rich repeat containing 8 family, member B	NM_015350	9.70844	9.46599	8.11933	6.78017	1.183	2.53003
A_22_P00009393	16	MCM3AP	Homo sapiens minichromosome maintenance complex component 3 associated protein (MCM3AP), mRNA [NM_003906]	GTGGGATTCAGACGCTTTCGCTTTTCAACTCACTTAGCAGCAAAGGGGATCAGATGATTT	8888	minichromosome maintenance complex component 3 associated protein	NM_003906	10.4004	10.5946	10.1833	10.0987	0.874065	1.06036
A_22_P00009403	15	LUZP1	Homo sapiens leucine zipper protein 1 (LUZP1), transcript variant 1, mRNA [NM_033631]	ACAGAAGTGGGCCCCGGATTTCTGCAAGTCGACTATCATGATGACTTCGCTGGAGGAAAG	7798	leucine zipper protein 1	NM_033631	5.24861	4.67331	5.293	4.93611	1.48999	1.28066
A_22_P00009477	3	MAGEA10-MAGEA5	Homo sapiens MAGEA10-MAGEA5 readthrough (MAGEA10-MAGEA5), mRNA [NM_001204811]	CACCAGGAAGCTCCAGAGGATCCCCAGGAGGCCCTAGAGGAGCACCAAAGGAGAAGATCT	100533997	MAGEA10-MAGEA5 readthrough	NM_001204811	2.7789	3.26176	3.40469	2.80651	0.715559	1.5138
A_22_P00009641	6	CHST4	Homo sapiens carbohydrate (N-acetylglucosamine 6-O) sulfotransferase 4 (CHST4), transcript variant 2, mRNA [NM_001166395]	TTTGCCCTATGAAAAGGTTTCTCGACTTCAGAAAGCCTGTGGCGATGCCATGAATTTGCT	10164	carbohydrate (N-acetylglucosamine 6-O) sulfotransferase 4	NM_001166395	3.63828	1.7384	2.44758	1.71065	3.73183	1.66662
A_22_P00009722	16	MCTP2	Homo sapiens multiple C2 domains, transmembrane 2 (MCTP2), transcript variant 1, mRNA [NM_018349]	CAAAACCTGCCTCTCATTTATGTATTAGGAATCTTGTGACAACGGAACAGTTGAAAAATT	55784	multiple C2 domains, transmembrane 2	NM_018349	10.1233	9.20545	9.96103	9.58946	1.88927	1.29376
A_22_P00009735	9	BTBD9	Homo sapiens BTB (POZ) domain containing 9 (BTBD9), transcript variant 1, mRNA [NM_052893]	ATGGCACGTGAGCAGCACTGCAGTCCTTGGGTCTTCGGCGCCAACCTGCAACCCTGATCA	114781	BTB (POZ) domain containing 9	NM_052893	3.81505	4.28262	4.4622	5.19986	0.723182	0.599711
A_22_P00009881	11	ELFN2	Homo sapiens extracellular leucine-rich repeat and fibronectin type III domain containing 2 (ELFN2), transcript variant 1, mRNA [NM_052906]	AAGCCCTGAGAACCCTTGCACCTTCCTAGCAGGAGACAAGGAGCAACGCTGCGGTGGGGA	114794	extracellular leucine-rich repeat and fibronectin type III domain containing 2	NM_052906	4.84976	4.64192	4.42143	5.12829	1.15496	0.612651
A_22_P00009907	12	MGAT4C	Homo sapiens MGAT4 family, member C (MGAT4C), mRNA [NM_013244]	ATCAGAGGATATTGCCAGTTTTCTAATGGATTATTGTTATCGGGCAGGTTTTCTCTGAAG	25834	MGAT4 family, member C	NM_013244	1.82414	1.82215	5.42031	7.62685	1.00138	0.216654
A_22_P00009941	16	IKZF3	Homo sapiens IKAROS family zinc finger 3 (Aiolos) (IKZF3), transcript variant 14, mRNA [NM_001284514]	GAACCCTGTAAGAAATAGCCCTGCTGATAGTTTTCTAGGTTTATCATGTTTGATTTTTAC	22806	IKAROS family zinc finger 3 (Aiolos)	NM_001284514	13.5007	13.3613	14.0708	13.685	1.10148	1.30667
A_22_P00010024	16	SLC12A5	Homo sapiens solute carrier family 12 (potassium/chloride transporter), member 5 (SLC12A5), transcript variant 1, mRNA [NM_001134771]	CAGAGTCCCGCCGGCATTCGGTCGCAGACCCCCGCCACCTCCCGGGGGAAGACGTCAAAG	57468	solute carrier family 12 (potassium/chloride transporter), member 5	NM_001134771	11.2345	11.5033	10.2445	10.5326	0.830018	0.818967
A_22_P00010155	16	MRPL46	Homo sapiens mitochondrial ribosomal protein L46 (MRPL46), mRNA [NM_022163]	AGACAGGAACCTTGTCCTGTTAGTCAGAGAGAAGTTTGGAGACCAGGATGTTTGGATACT	26589	mitochondrial ribosomal protein L46	NM_022163	10.1709	10.1577	10.1746	10.262	1.00917	0.941194
A_22_P00010205	16	MSH3	Homo sapiens mutS homolog 3 (MSH3), mRNA [NM_002439]	TTGAGCCGATTCTTCCAGTCTACGGGAAGCCTGAAATCCACCTCCTCCTCCACAGGTGCA	4437	mutS homolog 3	NM_002439	8.27375	8.28934	8.23721	8.39092	0.989257	0.898936
A_22_P00010235	16	MT1B	Homo sapiens metallothionein 1B (MT1B), mRNA [NM_005947]	CCTGTGCCTGCGCCGGCTCCTGCAAGTGCAAAGAGTGCAAATGTACCTCCTGCAAGAAGT	4490	metallothionein 1B	NM_005947	11.7832	11.3869	13.0201	13.6929	1.31611	0.627278
A_22_P00010386	16	MYL6B	Homo sapiens myosin, light chain 6B, alkali, smooth muscle and non-muscle (MYL6B), transcript variant 1, mRNA [NM_001199629]	AGGAGGTGGAGACCGTTCTGGCAGGACACGAGGACAGCAACGGCTGCATCAACTACGAGG	140465	myosin, light chain 6B, alkali, smooth muscle and non-muscle	NM_001199629	12.9271	12.4556	13.1744	13.1011	1.38659	1.05209
A_22_P00010389	16	MYLK3	Homo sapiens myosin light chain kinase 3 (MYLK3), mRNA [NM_182493]	GCATTCTCCCACTTTTGATGGATATGTATCCAAATAAAAGTCATTCCCATGCTTTCTTTC	91807	myosin light chain kinase 3	NM_182493	6.8206	6.50086	7.15685	7.68566	1.2481	0.693125
A_22_P00010449	16	CLUAP1	Homo sapiens clusterin associated protein 1 (CLUAP1), transcript variant 1, mRNA [NM_015041]	CCTGACGTGGATACTGAACAGGACCGAGTTTTCTTCATTAAGGCAATTGCCCAGTTCATG	23059	clusterin associated protein 1	NM_015041	7.18087	6.71962	7.43641	6.42606	1.37674	2.0144
A_22_P00010560	16	GPR107	Homo sapiens G protein-coupled receptor 107 (GPR107), transcript variant 4, mRNA [NM_001287346]	CCCGCTTCCCACATCCTTTCCCTCAGCCGTTACATCTTGGAGCCTGGATGCATTATGAAG	57720	G protein-coupled receptor 107	NM_001287346	7.84187	8.16131	8.35794	9.34779	0.801383	0.503529
A_22_P00010686	16	CYB5B	Homo sapiens cytochrome b5 type B (outer mitochondrial membrane) (CYB5B), mRNA [NM_030579]	AATGCGCACACAGTGAACGTTTGTTAGAACTACACACAATAAAGACACTGTTTTCCTTTT	80777	cytochrome b5 type B (outer mitochondrial membrane)	NM_030579	7.94538	7.73205	7.22212	6.87149	1.15936	1.27512
A_22_P00010689	16	DUS2	Homo sapiens dihydrouridine synthase 2 (DUS2), transcript variant 1, mRNA [NM_017803]	AGATCGCCTGTTCTCCTCTATTGTCACCGTTGCTGAACAAAAGTATCAGTCTACCTTGTG	54920	dihydrouridine synthase 2	NM_017803	8.65616	8.91354	7.69987	7.76648	0.836604	0.954881
A_22_P00010750	16	YTHDF3	Homo sapiens YTH N(6)-methyladenosine RNA binding protein 3 (YTHDF3), transcript variant 2, mRNA [NM_001277813]	ACATGCCTAGTTACTATGCTCCATCCATTGGATTTCCATATTCTCTTGGGGAAGCAGCGT	253943	YTH N(6)-methyladenosine RNA binding protein 3	NM_001277813	6.35421	6.45918	6.53407	6.16422	0.929823	1.29222
A_22_P00010751	16	YTHDF3	Homo sapiens YTH N(6)-methyladenosine RNA binding protein 3 (YTHDF3), transcript variant 5, mRNA [NM_001277816]	GCGGCGGCGGCGGCGGCTCTCGGGTTGCGGTGAAGAATGTCAGCCACTAGCGTGGATCAG	253943	YTH N(6)-methyladenosine RNA binding protein 3	NM_001277816	15.6815	15.9362	15.8651	15.9542	0.838153	0.940062
A_22_P00010852	13	LRPAP1	Homo sapiens low density lipoprotein receptor-related protein associated protein 1 (LRPAP1), transcript variant 1, mRNA [NM_002337]	TTCTATTTTCTCATCAAATTGAGACTTTGGGGAAACTACACAGCAGCAAACCAGGATATA	4043	low density lipoprotein receptor-related protein associated protein 1	NM_002337	4.4613	5.25298	5.42183	4.78748	0.577672	1.55225
A_22_P00010860	16	SEC22B	Homo sapiens SEC22 vesicle trafficking protein homolog B (S. cerevisiae) (gene/pseudogene) (SEC22B), mRNA [NM_004892]	TTTGTGAAGATGGTGTTGCTAACAATGATCGCCCGAGTGGCGGACGGGCTCCCGCTGGCC	9554	SEC22 vesicle trafficking protein homolog B (S. cerevisiae) (gene/pseudogene)	NM_004892	8.08201	8.51676	7.95712	8.21802	0.739826	0.834569
A_22_P00011159	16	ABO	Homo sapiens ABO blood group (transferase A, alpha 1-3-N-acetylgalactosaminyltransferase; transferase B, alpha 1-3-galactosyltransferase) (ABO), mRNA [NM_020469]	AAGTACCTGCTGCGCCACAAACCCACCAAGGTGCTCTCCCCCGAGTACTTGTGGGACCAG	28	ABO blood group (transferase A, alpha 1-3-N-acetylgalactosaminyltransferase; transferase B, alpha 1-3-galactosyltransferase)	NM_020469	5.56154	5.72824	6.06366	5.48045	0.890882	1.49818
A_22_P00011215	15	EML2	Homo sapiens echinoderm microtubule associated protein like 2 (EML2), transcript variant 1, mRNA [NM_001193268]	AGCGCGGCCCGGCCTTCTGCGGCCTGTACGACACGTCCTCGCTGCTGCGATACTGCAACG	24139	echinoderm microtubule associated protein like 2	NM_001193268	5.65931	5.33669	5.79821	4.77981	1.2506	2.02568
A_22_P00011315	14	MLYCD	Homo sapiens malonyl-CoA decarboxylase (MLYCD), mRNA [NM_012213]	AAGAACAAAATCACTGCTGCGATCTTTTATTCCATCAGCTTGACCCAGCAGGGACTCCAA	23417	malonyl-CoA decarboxylase	NM_012213	4.03065	5.95708	5.51859	5.30463	0.26308	1.15987
A_22_P00011339	16	COX8A	Homo sapiens cytochrome c oxidase subunit VIIIA (ubiquitous) (COX8A), mRNA [NM_004074]	TCCTGACCTTGGGCTACGGCTGACCGTTTTTTGTGGTGTACTCCGTGCCATCATGTCCGT	1351	cytochrome c oxidase subunit VIIIA (ubiquitous)	NM_004074	12.7216	13.0129	13.1757	13.436	0.817157	0.834894
A_22_P00011377	5	P2RY2	Homo sapiens purinergic receptor P2Y, G-protein coupled, 2 (P2RY2), transcript variant 1, mRNA [NM_176072]	CTTTGTGACCAAAGCAATTGTAAAACGTGGGGGAGGAAATTAAAAGCCTGCCACCTTAGT	5029	purinergic receptor P2Y, G-protein coupled, 2	NM_176072	4.34536	3.81212	3.21357	3.49904	1.44717	0.820471
A_22_P00011487	5	OPLAH	Homo sapiens 5-oxoprolinase (ATP-hydrolysing) (OPLAH), mRNA [NM_017570]	AACCAGAAACCTGCACGACAACCTGTCGGACCTCCGTGCCCAGGTGGCAGCCAACCAGAA	26873	5-oxoprolinase (ATP-hydrolysing)	NM_017570	4.04028	3.17458	3.85341	3.09604	1.82223	1.69041
A_22_P00011688	9	PDGFRB	Homo sapiens platelet-derived growth factor receptor, beta polypeptide (PDGFRB), mRNA [NM_002609]	TTTCTGATAACTGGGAGAGGGCAGTAAGGAGGACTTCCTGGAGGGGGTGACTGTCCAGAG	5159	platelet-derived growth factor receptor, beta polypeptide	NM_002609	4.56455	4.88525	3.76086	3.47276	0.800681	1.22103
A_22_P00011693	16	PDK3	Homo sapiens pyruvate dehydrogenase kinase, isozyme 3 (PDK3), transcript variant 1, mRNA [NM_001142386]	AAACATGACCAGAGAAGCATGTGACTCAGATAATGTTCCCCGGAAGTTGCAGAGCAATCT	5165	pyruvate dehydrogenase kinase, isozyme 3	NM_001142386	11.5283	11.2155	12.1879	11.8239	1.24206	1.28704
A_22_P00011888	3	KCNJ10	Homo sapiens potassium channel, inwardly rectifying subfamily J, member 10 (KCNJ10), mRNA [NM_002241]	ACAGGAAAACTGCTTCAGACCCACCAAACCAAGGAAGGGGAGAACATCCGGCTCAACCAG	3766	potassium channel, inwardly rectifying subfamily J, member 10	NM_002241	2.00407	2.91832	4.07104	1.86135	0.530618	4.62576
A_22_P00012004	16	PLCG2	Homo sapiens phospholipase C, gamma 2 (phosphatidylinositol-specific) (PLCG2), mRNA [NM_002661]	TGAATGAGTCACACAGATGTTGGCTGTTGTTAATGTGAAAATTAAACAGCTGTATCACAT	5336	phospholipase C, gamma 2 (phosphatidylinositol-specific)	NM_002661	11.9444	11.8092	13.1912	12.8653	1.09824	1.2535
A_22_P00012038	16	MTURN	Homo sapiens maturin, neural progenitor differentiation regulator homolog (Xenopus) (MTURN), mRNA [NM_152793]	CAGCCAGCAGTAAATCTGGGGGCTCCCCTGAGAAGGAGAGTGAGCCCCACAGTAACCTAG	222166	maturin, neural progenitor differentiation regulator homolog (Xenopus)	NM_152793	8.56523	7.32913	7.59661	9.13023	2.35561	0.345411
A_22_P00012055	16	DCTN5	Homo sapiens dynactin 5 (p25) (DCTN5), transcript variant 4, mRNA [NM_001199743]	AATATGAGAGCCCCAGGAACTGAAAAGGCCTGTGAGAGACTCTGAGCTTCCTGGGAACAG	84516	dynactin 5 (p25)	NM_001199743	7.38554	6.61489	6.81146	6.86846	1.70604	0.961264
A_22_P00012116	16	GOLGA3	Homo sapiens golgin A3 (GOLGA3), transcript variant 2, mRNA [NM_001172557]	ACATCAAGTCATTTGTGAGTCATCAGATCTTCTCCTGAAAATGGGAGACACAGTAGGGCC	2802	golgin A3	NM_001172557	6.40342	7.82034	6.40536	6.58292	0.37451	0.884198
A_22_P00012118	2	LRCOL1	Homo sapiens leucine rich colipase-like 1 (LRCOL1), mRNA [NM_001195520]	TTCTCTGCTTTCGGGCGTCTCGTCTAGAAGCTGCAGCTTGGCCTGTCTCACCTCTACACA	100507055	leucine rich colipase-like 1	NM_001195520	3.75829	1.86041	1.86143	4.59883	3.72667	0.149954
A_22_P00012139	16	POLR2C	Homo sapiens polymerase (RNA) II (DNA directed) polypeptide C, 33kDa (POLR2C), mRNA [NM_032940]	CGCAGTCACCGCGGAGCAGACGCGGAGGCTGGTGGCCCCTGGGCGAGATGCCGTACGCCA	5432	polymerase (RNA) II (DNA directed) polypeptide C, 33kDa	NM_032940	6.40603	6.95706	6.86846	6.74725	0.682535	1.08765
A_22_P00012140	4	POLR2F	Homo sapiens polymerase (RNA) II (DNA directed) polypeptide F (POLR2F), transcript variant 3, mRNA [NM_001301130]	ATAACGACAGTAGACGTTACATAGCCTTGACTCTGTACAGACCTCATCCTGCATCCTTAC	5435	polymerase (RNA) II (DNA directed) polypeptide F	NM_001301130	4.01992	3.96633	4.06894	4.37096	1.03784	0.811115
A_22_P00012283	16	PPP2R2D	Homo sapiens protein phosphatase 2, regulatory subunit B, delta (PPP2R2D), transcript variant 3, mRNA [NM_001291310]	GTCAACCCTGGTCCTTAAGACAGTTCTAGTAAAATGGGATTGTATATATTTGTTCAACTA	55844	protein phosphatase 2, regulatory subunit B, delta	NM_001291310	7.82931	7.82297	9.54547	8.05541	1.00441	2.80901
A_22_P00012477	16	LOC401052	Homo sapiens uncharacterized LOC401052 (LOC401052), mRNA [NM_001008737]	CTCTGCGGGTCCCGCGGCTCCCGCGGCTTCCGGCCCACTCAGCGCCTCCAGAGGCCTCAG	401052	uncharacterized LOC401052	NM_001008737	6.36074	6.78888	6.82041	6.89428	0.74322	0.95008
A_22_P00012594	16	SNUPN	Homo sapiens snurportin 1 (SNUPN), transcript variant 1, mRNA [NM_005701]	TTAAGGAGCCACAGGATGGTACCTGGCCCCAAAAGGAATCCTGGAGAGGAGGACAGTGAC	10073	snurportin 1	NM_005701	9.75959	10.0331	10.2559	10.0578	0.827299	1.14724
A_22_P00012669	10	FAM184B	Homo sapiens family with sequence similarity 184, member B (FAM184B), mRNA [NM_015688]	GCTTATGATTTATATATGATAGCTAAAACAAATTTTGGCGTTAACACTTCATACTGTTCT	27146	family with sequence similarity 184, member B	NM_015688	3.04673	4.72868	4.34295	3.00475	0.311661	2.52836
A_22_P00012900	16	RBM4	Homo sapiens RNA binding motif protein 4 (RBM4), transcript variant 3, mRNA [NM_001198844]	GAGGGCACATAACAAATGTTAGATCTCTCAAATGTTTTTCTGTAACCCAAATATGCTTAC	5936	RNA binding motif protein 4	NM_001198844	10.2704	10.7669	11.4195	11.4549	0.708786	0.975733
A_22_P00012919	16	NMNAT1	Homo sapiens nicotinamide nucleotide adenylyltransferase 1 (NMNAT1), transcript variant 2, mRNA [NM_001297778]	GGACAGAACTTCCACTTTGAATAATGGAAGTTAGAACAATGAATTTCACAGGGGAATAAA	64802	nicotinamide nucleotide adenylyltransferase 1	NM_001297778	5.78718	6.07622	6.05458	5.87232	0.818446	1.13466
A_22_P00012922	16	OAZ2	Homo sapiens ornithine decarboxylase antizyme 2 (OAZ2), transcript variant 1, mRNA [NM_002537]	TTTGCCTTTGAGTAACTGTCCCCAGCTCCAGTGCTGCAGGCACATTGTTCCAGGGCCTCT	4947	ornithine decarboxylase antizyme 2	NM_002537	6.479	6.02409	7.43585	6.8789	1.3707	1.47116
A_22_P00013045	15	RGS5	Homo sapiens regulator of G-protein signaling 5 (RGS5), transcript variant 3, mRNA [NM_001254748]	AAGAGCAAAACCAAGTGAAGGAAACTTCACTAAGTTCAGGGTGACAAGGGAGGAAGTACA	8490	regulator of G-protein signaling 5	NM_001254748	4.73149	5.63057	5.97772	5.45251	0.536231	1.43914
A_22_P00013159	8	RNF112	Homo sapiens ring finger protein 112 (RNF112), mRNA [NM_007148]	AAGATATGCAAGCAGAAGAGGGGCCTCCGGAGCCTGGGCGAGAAGATGAAGCTCCTGCCG	7732	ring finger protein 112	NM_007148	3.42458	3.75479	3.58334	3.75433	0.795421	0.888238
A_22_P00013430	16	BTG1	Homo sapiens B-cell translocation gene 1, anti-proliferative (BTG1), mRNA [NM_001731]	AAGGGATCGGGTTACCGTTGTATTCGCATCAACCATAAAATGGATCCTCTGATTGGACAG	694	B-cell translocation gene 1, anti-proliferative	NM_001731	15.0695	15.1832	14.8012	15.3928	0.92422	0.663595
A_22_P00013592	13	CFAP99	Homo sapiens cilia and flagella associated protein 99 (CFAP99), mRNA [NM_001193282]	ATTTACACCCAAGAGGGACAACCCTGAGCAGTTCCTGGAGGCTGCGGCCACCTCCCTGCA	402160	cilia and flagella associated protein 99	NM_001193282	4.32491	6.66006	5.1772	4.4162	0.198175	1.69467
A_22_P00013804	16	NUPR1L	Homo sapiens nuclear protein, transcriptional regulator, 1-like (NUPR1L), mRNA [NM_001145712]	ATAAGCTACGAGGAGGAGCTTTACGACTGCCTGGACTACTACTACCTGCGCGACTTCCCG	389493	nuclear protein, transcriptional regulator, 1-like	NM_001145712	6.92218	6.44618	7.47142	6.68915	1.39088	1.71984
A_22_P00013881	16	LOC100144595	Homo sapiens uncharacterized LOC100144595 (LOC100144595), mRNA [NM_001256368]	AGCCACAGACTATGGCCACCTACATCTTGAAGCTCCGTGCCTGCCCTTGGGAGACACTAA	100144595	uncharacterized LOC100144595	NM_001256368	7.94184	8.01322	7.50844	7.34009	0.951727	1.12377
A_22_P00013909	13	SLC37A4	Homo sapiens solute carrier family 37 (glucose-6-phosphate transporter), member 4 (SLC37A4), transcript variant 1, mRNA [NM_001164277]	ACCTTCTCCTTTGTCATGCCATCATTGGTGGAAGAGATCCCTTTGGACAAGGATGATTTG	2542	solute carrier family 37 (glucose-6-phosphate transporter), member 4	NM_001164277	4.17087	4.12913	5.3841	5.46367	1.02935	0.946339
A_22_P00013910	16	SLC37A4	Homo sapiens solute carrier family 37 (glucose-6-phosphate transporter), member 4 (SLC37A4), transcript variant 1, mRNA [NM_001164277]	AACATCCGCACCAAGATGGGCCGAGTGTCCAAGAAGGCTGAGTGAAGAGAGTCCAGGTTC	2542	solute carrier family 37 (glucose-6-phosphate transporter), member 4	NM_001164277	8.41856	8.02354	7.31763	7.41396	1.31496	0.935413
A_22_P00014053	16	DGKD	Homo sapiens diacylglycerol kinase, delta 130kDa (DGKD), transcript variant 2, mRNA [NM_152879]	CCCGGCTCCCCACAGAAGCTCATCCGCAAGGTGTCCACGTCGGGTCAGATCCGACAGAAG	8527	diacylglycerol kinase, delta 130kDa	NM_152879	10.569	10.7998	8.46149	8.67277	0.852132	0.863768
A_22_P00014071	16	PPP1R9B	Homo sapiens protein phosphatase 1, regulatory subunit 9B (PPP1R9B), mRNA [NM_032595]	GGCCATCGAGGTGTTTGAGCTAGCGGAGAACGAGGATGCACTGTCCCCTGTGGACATGGA	84687	protein phosphatase 1, regulatory subunit 9B	NM_032595	7.24723	7.94407	7.03594	7.20467	0.616921	0.889624
A_22_P00014094	16	SASH3	Homo sapiens SAM and SH3 domain containing 3 (SASH3), mRNA [NM_018990]	ACTACATCTAGGACTGCCGGCTAAGTGGACACACTTCTTGACCTCCTACCAGGAACTTTG	54440	SAM and SH3 domain containing 3	NM_018990	12.7035	12.5578	11.7064	11.2232	1.10629	1.39787
A_22_P00014361	16	CWC15	Homo sapiens CWC15 spliceosome-associated protein (CWC15), mRNA [NM_016403]	AAGAAGAGAGGATTCGTATGGAAAACATTCTGAGCGGAAACCCTCTCCTTATCTCACTGG	51503	CWC15 spliceosome-associated protein	NM_016403	11.1673	11.0841	10.7316	11.0264	1.05935	0.815185
A_22_P00014384	16	SF3B3	Homo sapiens splicing factor 3b, subunit 3, 130kDa (SF3B3), mRNA [NM_012426]	TCATGAACAACTACTTGTGGCATGCATTGGCACTCGGAATAAAGCGCACTATTGTCACTA	23450	splicing factor 3b, subunit 3, 130kDa	NM_012426	9.31039	9.05614	10.7967	10.2549	1.19272	1.45587
A_22_P00014396	4	SFTA3	Homo sapiens surfactant associated 3 (SFTA3), mRNA [NM_001101341]	AACAGTCCATACAGCCCTGCTGCATCCCACGACGCTGTCACAAAGCAGGAGTTCATCCGA	253970	surfactant associated 3	NM_001101341	3.9529	2.15739	3.2825	3.70233	3.47139	0.74751
A_22_P00014463	15	CXorf23	Homo sapiens chromosome X open reading frame 23 (CXorf23), mRNA [NM_198279]	ATTCAGTAACCACCAGGCACAAATTCACCAGGAACAACCAAGCAAGGAAGGAAGAAGAAG	256643	chromosome X open reading frame 23	NM_198279	3.59031	5.38358	5.32043	5.06101	0.288517	1.197
A_22_P00014694	16	SLC25A29	Homo sapiens solute carrier family 25 (mitochondrial carnitine/acylcarnitine carrier), member 29 (SLC25A29), transcript variant 2, mRNA [NM_001291813]	AGAACAGTATGGGACCCCCTCACCAGGCCTGGAACACCTCCAGCCACAAAGAAGCCAAAG	123096	solute carrier family 25 (mitochondrial carnitine/acylcarnitine carrier), member 29	NM_001291813	6.33127	8.14888	10.0786	10.6503	0.283691	0.672867
A_22_P00014697	16	TPT1	Homo sapiens tumor protein, translationally-controlled 1 (TPT1), transcript variant 1, mRNA [NM_001286272]	ATGCAAAAGAAAGAAATCCCTGCGCTTTCTGTCTGTCTTTGTGGCGGCCCAGATTGAATT	7178	tumor protein, translationally-controlled 1	NM_001286272	12.0168	12.6042	11.5779	11.1219	0.665513	1.37174
A_22_P00014746	16	ORC3	Homo sapiens origin recognition complex, subunit 3 (ORC3), transcript variant 2, mRNA [NM_012381]	ATGTTTCAAGGTTTTTAAGTCTTATTGTGAAAACCACCTTGGCAGCACAGCTAAGAGAAT	23595	origin recognition complex, subunit 3	NM_012381	6.88835	6.92525	7.5081	7.42471	0.974743	1.0595
A_22_P00014975	16	SMARCC2	Homo sapiens SWI/SNF related, matrix associated, actin dependent regulator of chromatin, subfamily c, member 2 (SMARCC2), transcript variant 1, mRNA [NM_003075]	CCCCATGTTTCTCTCCCTCTGCGTCTTAGCACCTTTCTTCTGTTCAAAGTTTTCTGTAAA	6601	SWI/SNF related, matrix associated, actin dependent regulator of chromatin, subfamily c, member 2	NM_003075	12.1972	12.248	11.7912	12.0391	0.965393	0.842151
A_22_P00015117	14	SNX2	Homo sapiens sorting nexin 2 (SNX2), transcript variant 2, mRNA [NM_001278199]	ACTGAAGCCAGTCAAGGTGAATACACAGAAAATCATTTTCTTATTAAGGTCAGTTAATGG	6643	sorting nexin 2	NM_001278199	7.14855	6.85795	5.53628	3.77766	1.22315	3.38374
A_22_P00015270	1	SPATA13	Homo sapiens spermatogenesis associated 13 (SPATA13), transcript variant 3, mRNA [NM_001286792]	AAATGGCAACACCGTGCAGATGGCAAAGCGTAGGCCTCACAAACATCCTGGCCGTGAAGG	221178	spermatogenesis associated 13	NM_001286792	2.0579	1.99392	2.6875	2.02311	1.04535	1.5849
A_22_P00015282	16	NBPF1	Homo sapiens neuroblastoma breakpoint family, member 1 (NBPF1), mRNA [NM_017940]	CGCGGCTGCCGGCTGCCCTGTGAATGGGAAGTTACGCGAAGTCCACCCAGCGTTTCTGAG	55672	neuroblastoma breakpoint family, member 1	NM_017940	5.71629	5.66917	6.73227	6.86431	1.0332	0.91254
A_22_P00015308	16	LAT	Homo sapiens linker for activation of T cells (LAT), transcript variant 1, mRNA [NM_014387]	GCCGGGAGTATGTGAATGTGTCCCAGGAACTGCATCCTGGAGCGGCTAAGACTGAGCCTG	27040	linker for activation of T cells	NM_014387	5.65281	5.94196	6.46427	5.44717	0.818382	2.02384
A_22_P00015377	16	TMEM265	Homo sapiens transmembrane protein 265 (TMEM265), mRNA [NM_001256829]	ACTAGCATTATCTGTGGCTGCTCTTGCCTGGGAGTCATGGCTCTGGTGTTTGCCATCAAG	100862671	transmembrane protein 265	NM_001256829	6.06806	6.81397	7.00138	6.31371	0.596293	1.61068
A_22_P00015441	8	COG1	Homo sapiens component of oligomeric golgi complex 1 (COG1), mRNA [NM_018714]	AGAAGTTCTACAGCATGGCTGCCCAGATCAAGCTACTCTTAGAAATTCCGGAGAAGATCT	9382	component of oligomeric golgi complex 1	NM_018714	3.26695	3.22921	3.61366	4.38086	1.02651	0.587557
A_22_P00015495	8	STARD13	Homo sapiens StAR-related lipid transfer (START) domain containing 13 (STARD13), transcript variant 4, mRNA [NM_001243476]	ATCCAGAATCTTGATGGTGTGCCAAGCCAAATGTCAACTGGAACTCAACCAAAAACTAAA	90627	StAR-related lipid transfer (START) domain containing 13	NM_001243476	4.23175	2.76373	1.62474	4.11845	2.76643	0.17755
A_22_P00015589	16	STX6	Homo sapiens syntaxin 6 (STX6), transcript variant 1, mRNA [NM_005819]	ACTGGTGTTTTGCTGTTGCTCATTCCATGCATCTTTGGCAGCTCTTTTCTTCTGCTCAGA	10228	syntaxin 6	NM_005819	8.36671	8.17011	8.89986	9.08239	1.14599	0.881157
A_22_P00015597	16	STXBP5	Homo sapiens syntaxin binding protein 5 (tomosyn) (STXBP5), transcript variant 2, mRNA [NM_001127715]	ATGAATGTCTCTTTATGCTGAAGGGCTCTGATTGGGCAAAATAAAATACTCTAATCTCTC	134957	syntaxin binding protein 5 (tomosyn)	NM_001127715	5.67934	4.85689	5.74253	6.45029	1.7684	0.612268
A_22_P00015621	16	TMEM180	Homo sapiens transmembrane protein 180 (TMEM180), mRNA [NM_024789]	TTTCAAATTCCCTTACCTGAGGAAGGAGCCCGATTACAAGGATATTTACCTGCTCCTACC	79847	transmembrane protein 180	NM_024789	6.57408	5.96957	5.95165	6.41382	1.52046	0.725892
A_22_P00015730	16	SZT2	Homo sapiens seizure threshold 2 homolog (mouse) (SZT2), mRNA [NM_015284]	AGTGCTGTAAAAACCCGGGCCTTCACGAAAAGCGCCTACGGTTAGCGAGAGAGGGATCAC	23334	seizure threshold 2 homolog (mouse)	NM_015284	7.17483	7.63917	7.99876	7.73866	0.724803	1.19756
A_22_P00015733	10	TAB2	Homo sapiens TGF-beta activated kinase 1/MAP3K7 binding protein 2 (TAB2), transcript variant 4, mRNA [NM_001292035]	GGATGAAGAAGGATTTGAGACTAAGTTTATTCCTCCAAAGCAAACCAACTGAGAATGCAG	23118	TGF-beta activated kinase 1/MAP3K7 binding protein 2	NM_001292035	1.66089	1.65439	4.8343	7.25419	1.00452	0.186871
A_22_P00015990	15	TET3	Homo sapiens tet methylcytosine dioxygenase 3 (TET3), mRNA [NM_001287491]	CAGATCTGCAAACTGCGAAAATGTGAGGTGCTGAAGAAAAAAGTAGGGCTTCTCAAGGAG	200424	tet methylcytosine dioxygenase 3	NM_001287491	4.34342	4.96657	5.60254	5.62662	0.649249	0.983448
A_22_P00015995	13	TEX261	Homo sapiens testis expressed 261 (TEX261), mRNA [NM_144582]	GCAGAACTGATAGAAGAATACACAGTGGCCACCAGCAGGATCATAAAATACATGATCTGG	113419	testis expressed 261	NM_144582	4.39478	3.41445	5.08017	6.99338	1.97291	0.265501
A_22_P00016064	2	LARP6	Homo sapiens La ribonucleoprotein domain family, member 6 (LARP6), transcript variant 3, mRNA [NM_001286679]	TAGCAGGCCAGGTACAGCGGACACTTGCTGATGGGGGATTCCAGGAGGTGGGATTTCAAG	55323	La ribonucleoprotein domain family, member 6	NM_001286679	1.7101	3.17308	3.05282	1.93984	0.362742	2.16291
A_22_P00016110	16	THTPA	Homo sapiens thiamine triphosphatase (THTPA), transcript variant 7, mRNA [NM_001256323]	GTATGGCGTGGGCTCCCTTCCCCCTCTGTGGGTCCCGCGAGGAGACTCTCGGGCTTTGAG	79178	thiamine triphosphatase	NM_001256323	10.3979	10.4306	10.4927	10.4221	0.977575	1.05011
A_22_P00016170	16	DCP1A	Homo sapiens decapping mRNA 1A (DCP1A), transcript variant 5, mRNA [NM_001290207]	TGAGCCTAGCGGCCCTGAAGCAACACGACCCCTATATCACCAGCATCGCAGACCTCACGG	55802	decapping mRNA 1A	NM_001290207	6.77475	6.79733	6.71962	6.96471	0.984465	0.84376
A_22_P00016415	16	ADAT1	Homo sapiens adenosine deaminase, tRNA-specific 1 (ADAT1), transcript variant 1, mRNA [NM_012091]	AAAGTGGAACTCTTCAGATCATTCCAGAAGCTGCTAAGCAGAATTGCAAGGGACAAGTGG	23536	adenosine deaminase, tRNA-specific 1	NM_012091	5.44085	5.96498	6.13239	5.93953	0.695377	1.14302
A_22_P00016518	16	PLAC4	Homo sapiens placenta-specific 4 (PLAC4), mRNA [NM_182832]	GACACCTCACTCTGCACCCTGGACACCCTCACTCACCCTGGACACGTTCACTCACCCTGA	191585	placenta-specific 4	NM_182832	7.23684	7.44062	8.07166	7.39987	0.868275	1.59305
A_22_P00016601	16	KIAA0040	Homo sapiens KIAA0040 (KIAA0040), transcript variant 1, mRNA [NM_001162893]	AAGAAGTAACGTGGAAGGAGGCTCCCCAAGCTGGCTGGCCATTTTGCTGCTGTGTGTGGA	9674	KIAA0040	NM_001162893	9.36812	8.73026	7.91355	7.2312	1.55603	1.60475
A_22_P00016602	16	KIAA0040	Homo sapiens KIAA0040 (KIAA0040), transcript variant 4, mRNA [NM_001162895]	GACGGGGCAGCAACCAGGAGATTCCCTGGGCCTGCAGGAAGCCCTTCCGCGGACCGAAAG	9674	KIAA0040	NM_001162895	7.25553	6.43326	5.91611	5.79557	1.76818	1.08714
A_22_P00016850	16	LOC283710	Homo sapiens uncharacterized LOC283710 (LOC283710), mRNA [NM_001243538]	TGACAACAGCAGACGACAGGCCGCACTGATCCCACCTGGCTTACAGGTGCTGTCACACAG	283710	uncharacterized LOC283710	NM_001243538	11.3043	11.1199	9.80033	9.39539	1.13637	1.32403
A_22_P00016935	16	TSPAN33	Homo sapiens tetraspanin 33 (TSPAN33), mRNA [NM_178562]	ATACTTAGATCCTAACGTGCCAGTGAGACCTGGCTGTGGAGAGTAGCACTGGCAGCCCTG	340348	tetraspanin 33	NM_178562	9.20809	9.36187	8.55298	8.64982	0.898892	0.93508
A_22_P00017059	16	ADAM8	Homo sapiens ADAM metallopeptidase domain 8 (ADAM8), transcript variant 2, mRNA [NM_001164489]	TGCAGACGGCCGGGACCTGCGGGGTCAGCGACGACAGCCTGGGCAGCCTCCTGGGACCCC	101	ADAM metallopeptidase domain 8	NM_001164489	6.03609	6.51183	6.2468	6.24529	0.719095	1.00105
A_22_P00017060	3	ADAM8	Homo sapiens ADAM metallopeptidase domain 8 (ADAM8), transcript variant 2, mRNA [NM_001164489]	ACAGGTGGGCAGGCTGCCGAGGAGTCCTGCTTCTCCTATGACATCCTACCAGGCTGCAAG	101	ADAM metallopeptidase domain 8	NM_001164489	4.01518	3.91411	1.69691	1.7236	1.07256	0.981672
A_22_P00017108	16	EMG1	Homo sapiens EMG1 N1-specific pseudouridine methyltransferase (EMG1), mRNA [NM_006331]	AATGTTCTGATTGAAGTGAATCCCCAGACCCGAATTCCCAGAACCTTTGACCGCTTTTGT	10436	EMG1 N1-specific pseudouridine methyltransferase	NM_006331	11.8422	11.8279	11.6326	12.0824	1.01	0.732154
A_22_P00017341	16	ERVMER34-1	Homo sapiens endogenous retrovirus group MER34, member 1 (ERVMER34-1), transcript variant 2, mRNA [NM_001242690]	ACCTTGGGCTCCAGGAATTCGTTGTCTACGTCTGCGGAGGTGCGGCAGCCTCAGTTTTAA	100288413	endogenous retrovirus group MER34, member 1	NM_001242690	10.9309	10.3082	9.74325	9.68752	1.5397	1.03939
A_22_P00017486	16	TMEM88B	Homo sapiens transmembrane protein 88B (TMEM88B), mRNA [NM_001146685]	CCGGGTCCCCGGTGCCGCGCGCTGTTCTCAGACCGCGGCTCCGCGGCGCTCATCGTGTTC	643965	transmembrane protein 88B	NM_001146685	6.72346	6.92896	6.30185	6.38282	0.867236	0.94542
A_22_P00017726	16	KIZ	Homo sapiens kizuna centrosomal protein (KIZ), transcript variant 1, mRNA [NM_018474]	ACACCGATGATTCTGATGATTTTTATGACTAACGTGCTGTGACATTGGTTTCAAATAAAG	55857	kizuna centrosomal protein	NM_018474	11.0638	11.4641	11.3223	12.2086	0.757722	0.541012
A_22_P00017727	16	KIZ	Homo sapiens kizuna centrosomal protein (KIZ), transcript variant 3, mRNA [NM_001163023]	CCTGTCGAGTCCCGACTACTACGAGAGGCTGGGCCAACTCCAGCACGGGCTGCGGGACAG	55857	kizuna centrosomal protein	NM_001163023	7.63017	8.07095	7.66278	8.22752	0.736739	0.676076
A_22_P00017804	15	ZBTB20	Homo sapiens zinc finger and BTB domain containing 20 (ZBTB20), transcript variant 3, mRNA [NM_001164343]	CACTTTCCGAGGTATTGTACAAGTTCACACTGTTTGTGAAGTTTGAATATGAAGGAATAA	26137	zinc finger and BTB domain containing 20	NM_001164343	6.89428	6.23706	8.42085	8.02992	1.57705	1.31124
A_22_P00017942	16	SPN	Homo sapiens sialophorin (SPN), transcript variant 1, mRNA [NM_001030288]	GGAGGAAAAAGCAAAGCAAAAGAAGCAGTGGATATTTTAAGACTAAAAAGGAAAACAAAA	6693	sialophorin	NM_001030288	9.59485	9.77562	7.81008	6.48868	0.88223	2.49909
A_22_P00018022	16	ZNF207	Homo sapiens zinc finger protein 207 (ZNF207), transcript variant 2, mRNA [NM_001032293]	CAAAAAAAGAAGCAACAAGATGATTCTGATGAATATGATGATGACGACTCTGCAGCCTCA	7756	zinc finger protein 207	NM_001032293	7.09882	7.3442	7.07517	7.30925	0.843589	0.850232
A_22_P00018048	16	ZNF275	Homo sapiens zinc finger protein 275 (ZNF275), mRNA [NM_001080485]	AAACAGAAGCTTCTAGGCATCAGAAGGTGTGGGGAGCAGCACAGTACTCAGAGGAGTGAG	10838	zinc finger protein 275	NM_001080485	5.97501	6.02025	6.32658	6.36669	0.969123	0.972579
A_22_P00018159	13	LOC728485	Homo sapiens uncharacterized LOC728485 (LOC728485), mRNA [NM_001294306]	AACGATAGGTACTATTTCGTGTAAGGCAAAGTCCTTTGAAAGGGCTCCTAGAGCGTCAAG	728485	uncharacterized LOC728485	NM_001294306	1.89587	1.88856	6.98728	7.02929	1.00508	0.971304
A_22_P00018172	15	ZNF718	Homo sapiens zinc finger protein 718 (ZNF718), transcript variant 2, mRNA [NM_001289930]	GTCTGTTCGCATCTTTTAGAATACGCTGGTGTCGGTGCGCACAGCGCTTCTCTTAGTTCT	255403	zinc finger protein 718	NM_001289930	5.46119	5.52239	8.38297	7.5674	0.958464	1.76
A_22_P00018317	2	SSPO	Homo sapiens SCO-spondin (SSPO), mRNA [NM_198455]	ACTGTATTCACCCTGGACTGTGCCAACCAGTGCCCACACAGCTGTGCCGACCTCTGGGAC	23145	SCO-spondin	NM_198455	3.38836	4.13271	3.54471	2.93386	0.596936	1.52715
A_22_P00018319	5	SSPO	Homo sapiens SCO-spondin (SSPO), mRNA [NM_198455]	CCCACGATGTCCACCACAGCGATGTCCCCCTGCAGGTGGAGCTGCTGGGCTGCGAGCCAG	23145	SCO-spondin	NM_198455	4.08376	2.85849	4.38338	4.49787	2.338	0.923703
A_22_P00018321	1	SSPO	Homo sapiens SCO-spondin (SSPO), mRNA [NM_198455]	ACTGGTGCCCCAACATCCTTACTGCCTACCAAGAGCGCCGCTTCTGCAACCTGCGAGCCT	23145	SCO-spondin	NM_198455	4.02571	3.87135	3.9135	3.73874	1.11293	1.12878
A_22_P00018322	16	SSPO	Homo sapiens SCO-spondin (SSPO), mRNA [NM_198455]	AGGACGGGCTGTGCGTGCCCCCAGCCCACTGCCGCTGCCAGTACCAGCCTGGAGCCATGG	23145	SCO-spondin	NM_198455	9.1543	9.22025	8.92216	9.18377	0.955319	0.834158
A_22_P00018323	16	SSPO	Homo sapiens SCO-spondin (SSPO), mRNA [NM_198455]	ATTCATCCTGCCCAGGAGATGCCACCCAGGAGGAGCCCTGCAGCCCCCCTGTATGCCCAG	23145	SCO-spondin	NM_198455	8.78826	8.78774	8.49882	8.44322	1.00036	1.03929
A_22_P00018324	16	SSPO	Homo sapiens SCO-spondin (SSPO), mRNA [NM_198455]	CCATTGAAGGGGCCGAGTATAGCCCCTGTGGCCCTCCGTGCCCTCGCTCCTGTGATGACC	23145	SCO-spondin	NM_198455	10.3934	10.5747	10.6312	10.4584	0.881926	1.12731
A_22_P00018341	16	ZRANB1	Homo sapiens zinc finger, RAN-binding domain containing 1 (ZRANB1), mRNA [NM_017580]	GTGTACATATTTGAACTGGCCAAGAGCAATCAGATGTACCCAGTGCTTATCCCAACGTAG	54764	zinc finger, RAN-binding domain containing 1	NM_017580	7.18332	7.50309	7.59362	7.98073	0.801198	0.764661
A_22_P00018462	16	MIA3	Homo sapiens melanoma inhibitory activity family, member 3 (MIA3), transcript variant 2, mRNA [NM_001300867]	TTCAATCCCAGAGTCCGCCCCCTGAATTGGGGCCTTTCCGGAGGAGGAAGCTCTGAAAAA	375056	melanoma inhibitory activity family, member 3	NM_001300867	7.09753	7.35764	6.31442	7.03202	0.835024	0.608106
A_22_P00018555	16	ZNF569	Homo sapiens zinc finger protein 569 (ZNF569), mRNA [NM_152484]	GGCTCTGCCACTTTGGCAGCGTTAAGTGTGGAATCGGGGCCTGTGTCCGCGGGCTTGGTG	148266	zinc finger protein 569	NM_152484	10.3865	10.3472	8.49849	9.86807	1.02762	0.387003
A_22_P00018817	12	SP140	Homo sapiens SP140 nuclear body protein (SP140), transcript variant 2, mRNA [NM_001005176]	TGCAGGAAGGAACGGGGCAGTGAAAATCGAATCGGGTGTGATCCTAGGCCAAGCTCATGG	11262	SP140 nuclear body protein	NM_001005176	5.62945	6.85674	3.61941	5.83153	0.427119	0.215817
A_22_P00018851	16	CELF6	Homo sapiens CUGBP, Elav-like family member 6 (CELF6), transcript variant 2, mRNA [NM_001172684]	TGAGCTTAGAAGTGGTGTGTGCTCTGTCTGTCTGTCTTTGTCTGTCTGTTGTATACAGTG	60677	CUGBP, Elav-like family member 6	NM_001172684	10.2027	10.4561	10.3171	10.3345	0.838961	0.988024
A_22_P00018950	16	TMEM231	Homo sapiens transmembrane protein 231 (TMEM231), transcript variant 1, mRNA [NM_001077416]	AGCACGTTCCCCGCCTTCAACCGGCTGCAAGGGGATCGCCTGCGCGTCCCGCTCGTTTCG	79583	transmembrane protein 231	NM_001077416	8.43685	7.317	7.05911	7.08873	2.17324	0.979682
A_22_P00019101	16	CREB1	Homo sapiens cAMP responsive element binding protein 1 (CREB1), transcript variant B, mRNA [NM_134442]	TTGGACAGTTCACCAGATTCTCAAGAAGGCTTTCAAACAACTATAAAGTTTGATGTTTGT	1385	cAMP responsive element binding protein 1	NM_134442	8.57961	8.54927	7.39522	7.40704	1.02125	0.991844
A_22_P00019571	16	SNAPC1	Homo sapiens small nuclear RNA activating complex, polypeptide 1, 43kDa (SNAPC1), mRNA [NM_003082]	GAAGAATTTAAGGACCCAAGTGATCGTGTGATGAAACTTATCACTTCTGATGTATTAGAG	6617	small nuclear RNA activating complex, polypeptide 1, 43kDa	NM_003082	8.83383	8.79049	9.08522	8.55719	1.0305	1.44195
A_22_P00019588	16	ZC3H6	Homo sapiens zinc finger CCCH-type containing 6 (ZC3H6), mRNA [NM_198581]	GGGAATGTGAATTTTTACCGTTTGTACTTAAGATACATTTGTTGTCTAAAATGGCTCTGG	376940	zinc finger CCCH-type containing 6	NM_198581	8.74129	9.18608	7.65247	8.46749	0.734693	0.568401
A_22_P00019592	16	MRPL9	Homo sapiens mitochondrial ribosomal protein L9 (MRPL9), transcript variant 2, mRNA [NM_001300733]	CTGCTGCGGGCGGGCGCTGGACGGCTGCTTCGGGGAGGCGTCCAGGAGCTACTGCGGCCG	65005	mitochondrial ribosomal protein L9	NM_001300733	10.2081	10.3046	9.75498	10.0449	0.935257	0.817947
A_22_P00019607	16	PCBP4	Homo sapiens poly(rC) binding protein 4 (PCBP4), transcript variant 1, mRNA [NM_020418]	CGCAGGTCGCTGTGGCCCCAGCCTCGCCTGACAGAATGAGCGGCTCGGACGGGGGACTGG	57060	poly(rC) binding protein 4	NM_020418	5.90339	5.97501	6.17129	6.11051	0.951568	1.04303
A_22_P00019640	16	GPN1	Homo sapiens GPN-loop GTPase 1 (GPN1), transcript variant 1, mRNA [NM_007266]	ATTGACACACCTGGACAGATTGAGGTATTCACCTGGTCAGCTTCTGGGACAATTATCACT	11321	GPN-loop GTPase 1	NM_007266	6.81546	7.27733	6.30703	6.63533	0.726044	0.79648
A_22_P00019830	1	CDK5RAP3	Homo sapiens CDK5 regulatory subunit associated protein 3 (CDK5RAP3), transcript variant 4, mRNA [NM_001278197]	TATTAGAGAAACTGAATGAGGAGGCAAAGCATGACAAGTGCCACAAGAGACCTGCACACT	80279	CDK5 regulatory subunit associated protein 3	NM_001278197	3.41464	3.32051	2.39652	2.71473	1.06742	0.802065
A_22_P00020023	16	PDP2	Homo sapiens pyruvate dehyrogenase phosphatase catalytic subunit 2 (PDP2), mRNA [NM_020786]	CTTAACTTGCCTCCTGGGAAATAATGATCTAGCATTTACTTGGAACAATGATTAATCATG	57546	pyruvate dehyrogenase phosphatase catalytic subunit 2	NM_020786	10.6684	11.028	11.5619	12.0775	0.779363	0.699488
A_22_P00020384	16	SYNJ2BP-COX16	Homo sapiens SYNJ2BP-COX16 readthrough (SYNJ2BP-COX16), transcript variant 1, mRNA [NM_001202547]	ATCAAAGACTCCAAGTTTGATGACTGGAAGAATATTCGAGGACCCAGGCCTTGGGAAGAT	100529257	SYNJ2BP-COX16 readthrough	NM_001202547	10.8099	10.3496	12.0236	11.5193	1.37584	1.41839
A_22_P00020400	16	LOC730183	Homo sapiens uncharacterized LOC730183 (LOC730183), mRNA [NM_001256932]	TTGAGAATCTGATACCTTTACCCCAGAATAGAACAATAAATAACAGCTACCTTCTACTGA	730183	uncharacterized LOC730183	NM_001256932	9.94512	9.7608	10.0242	8.85919	1.13628	2.2423
A_22_P00020501	16	PHKG2	Homo sapiens phosphorylase kinase, gamma 2 (testis) (PHKG2), transcript variant 2, mRNA [NM_001172432]	TTTGCGGTGAAGATTATGGAAGTGACAGCTGAGCGGCTGAGTCCTGAGCAGCTGGAGGAG	5261	phosphorylase kinase, gamma 2 (testis)	NM_001172432	6.34991	6.2176	6.86691	6.62607	1.09605	1.18168
A_22_P00020563	3	NEURL4	Homo sapiens neuralized E3 ubiquitin protein ligase 4 (NEURL4), transcript variant 1, mRNA [NM_032442]	GGCTATGCTCATGGCCTTGTCTTCAGTACCAAGGAGCTGAGGGCTGAGGAAGTCTTTGAG	84461	neuralized E3 ubiquitin protein ligase 4	NM_032442	2.01621	3.0829	2.79631	2.45839	0.477413	1.26393
A_22_P00021057	2	TMEM184B	Homo sapiens transmembrane protein 184B (TMEM184B), transcript variant 3, mRNA [NM_001195072]	TTCCAGAGGAACGGGGGACAGCCAGGCTCGCCCATGGGCCTTCAGGAATATTTATACATG	25829	transmembrane protein 184B	NM_001195072	3.31647	2.28242	3.95166	2.64174	2.04776	2.47928
A_22_P00021338	16	GPATCH2L	Homo sapiens G patch domain containing 2-like (GPATCH2L), transcript variant 1, mRNA [NM_017926]	TGGTCTCCTCCTAAGCTCTGAGGTGCTCTCATATTCCCTCCATAAGTAAAGAGATTTTTT	55668	G patch domain containing 2-like	NM_017926	9.35527	9.43839	9.32119	9.63171	0.944012	0.80635
A_22_P00021340	2	CCDC114	Homo sapiens coiled-coil domain containing 114 (CCDC114), mRNA [NM_144577]	GGAGGAGGCGAAGGCCAAGATGGGCTTGCTGCGGGAGCGCGCGGAGAAAGAGGAGGCCCA	93233	coiled-coil domain containing 114	NM_144577	2.94999	4.40646	1.91219	2.59447	0.364384	0.623179
A_22_P00021380	16	STMND1	Homo sapiens stathmin domain containing 1 (STMND1), mRNA [NM_001190766]	CGGGGTCCATCCTCTGCTGCTCCTTTAAAACAAATTGCATGGATTTGTATTAAGTATTTT	401236	stathmin domain containing 1	NM_001190766	7.07812	6.77633	6.72964	7.10631	1.23267	0.770214
A_22_P00021487	16	TRABD2B	Homo sapiens TraB domain containing 2B (TRABD2B), mRNA [NM_001194986]	TATCCTCACCCTTTCTCCAAGTGGGAGCTGGGCTCTTCCTTTCCGGAGATACTCTGGATA	388630	TraB domain containing 2B	NM_001194986	6.17745	5.79937	5.89711	5.76093	1.29961	1.09899
A_22_P00021578	16	TSGA10IP	Homo sapiens testis specific, 10 interacting protein (TSGA10IP), mRNA [NM_152762]	CTACAACCCCAGCCTGGACCCGGAGTGCAGTCCCTGAGATAAAATTAAAGGCTTTATGGC	254187	testis specific, 10 interacting protein	NM_152762	6.48599	6.10164	6.50196	6.95623	1.30527	0.72988
A_22_P00021677	16	KRIT1	Homo sapiens KRIT1, ankyrin repeat containing (KRIT1), transcript variant 4, mRNA [NM_194455]	GGAATTTGGGGTGGAATGTGATGAGATTAAAATGTAGCTTTGGTATAACTTCATGTGTAT	889	KRIT1, ankyrin repeat containing	NM_194455	10.5208	10.5449	10.1847	10.0643	0.983394	1.08706
A_22_P00021933	15	P4HA2	Homo sapiens prolyl 4-hydroxylase, alpha polypeptide II (P4HA2), transcript variant 1, mRNA [NM_004199]	TTCTTGAGACCTTGTGGATCAACAGAAGTTGACTGACATCCTTTTCTGTCCTTCCCCTTC	8974	prolyl 4-hydroxylase, alpha polypeptide II	NM_004199	8.82267	8.89276	10.2234	10.2081	0.952578	1.01068
A_22_P00022135	16	FAM110A	Homo sapiens family with sequence similarity 110, member A (FAM110A), transcript variant 4, mRNA [NM_001289145]	AGCAGCTGAAGGCTAGGCGCCACTGGGCCTGGAATTCGCCACAGGACGGATCTTACAGAG	83541	family with sequence similarity 110, member A	NM_001289145	7.24415	7.47119	6.45559	6.38602	0.854383	1.0494
A_22_P00022185	14	TMEM184A	Homo sapiens transmembrane protein 184A (TMEM184A), mRNA [NM_001097620]	TATGTGCCAGCTGTTGCACACTCACCTCCACACCCAACTCACAGGAAGCAAGGCTGGGAA	202915	transmembrane protein 184A	NM_001097620	4.27581	4.40778	5.73158	6.0926	0.912583	0.778616
A_22_P00022232	16	RCL1	Homo sapiens RNA terminal phosphate cyclase-like 1 (RCL1), transcript variant 1, mRNA [NM_005772]	TCATGGACACGGACACGGATCTTCATCTGGTTCATTGTATTTATATGTGAGGGATGGATG	10171	RNA terminal phosphate cyclase-like 1	NM_005772	11.5289	11.3125	10.9189	10.6495	1.16185	1.20533
A_22_P00022693	16	SH3TC1	Homo sapiens SH3 domain and tetratricopeptide repeats 1 (SH3TC1), mRNA [NM_018986]	GACCTTCGCCACAGAGCTCAACGTCCGCAGGGTCAACCTGCCTCCTCTGCCACTCTGCGG	54436	SH3 domain and tetratricopeptide repeats 1	NM_018986	10.1034	10.1361	8.99252	9.50874	0.977584	0.699201
A_22_P00022774	16	GPS2	Homo sapiens G protein pathway suppressor 2 (GPS2), mRNA [NM_004489]	GATTATATCTTCAACACCACACCCCCCACCCCATCGTGGGTGAGGGTATCCCCTGTGTGT	2874	G protein pathway suppressor 2	NM_004489	11.4673	11.5861	11.5836	11.7225	0.920956	0.908209
A_22_P00022810	16	POFUT1	Homo sapiens protein O-fucosyltransferase 1 (POFUT1), transcript variant 1, mRNA [NM_015352]	TCAGCAGTAATAATCACTTGTGTTCTGAAAGAAAGGGCACCAGAAGTTCTAGCAAAATTC	23509	protein O-fucosyltransferase 1	NM_015352	7.76555	7.48511	7.17934	7.43476	1.21456	0.837744
A_22_P00023038	16	JAG2	Homo sapiens jagged 2 (JAG2), transcript variant 2, mRNA [NM_145159]	GTGTCCCCTACCCCGGCTGCGTGCATGGCAGTTGTGTGGAGCCCTGGCAGTGCAACTGTG	3714	jagged 2	NM_145159	10.1773	9.81816	9.34525	9.41625	1.28267	0.951979
A_22_P00023374	16	INAFM2	Homo sapiens InaF-motif containing 2 (INAFM2), mRNA [NM_001301268]	GCTGTGAACATGACCAGAGACATTATTTATAATTCAGCCATTTAAGATATACCTGTACTC	100505573	InaF-motif containing 2	NM_001301268	10.6012	11.0883	11.5123	11.6271	0.713457	0.923507
A_22_P00023378	16	TSPAN33	Homo sapiens tetraspanin 33 (TSPAN33), mRNA [NM_178562]	CCAGTGTTTAGCTCCCAACTAGTAACAGACGGAAAGAAAAAATAAAATTATCCAGAATCT	340348	tetraspanin 33	NM_178562	10.6034	10.6554	10.3737	9.91264	0.96463	1.37657
A_22_P00023586	2	HOXA9	Homo sapiens homeobox A9 (HOXA9), mRNA [NM_152739]	CTACCTAGGGTTTATGCTTAATTTTAATTGGAGGAAATGAATGCTGATTGTAACGGAGTT	3205	homeobox A9	NM_152739	1.7682	1.76014	2.74582	1.77937	1.0056	1.95403
A_22_P00023587	16	CDK3	Homo sapiens cyclin-dependent kinase 3 (CDK3), mRNA [NM_001258]	GTGCTTCTTTTGGTTCATTTCTGGCTTGACAACAATAAATAAACGTGGTATGTTCCTGAG	1018	cyclin-dependent kinase 3	NM_001258	10.9326	11.1697	12.1021	12.58	0.848489	0.718006
A_22_P00023828	7	CES3	Homo sapiens carboxylesterase 3 (CES3), transcript variant 2, mRNA [NM_001185177]	CTGAAGTAGACACCACCCTGGGTCGTGTGCGAGGCCGGCAGGTGGGCGTGAAGGGCACAG	23491	carboxylesterase 3	NM_001185177	7.67505	2.97866	3.87959	5.5392	25.9271	0.316525
A_22_P00024043	16	DGAT1	Homo sapiens diacylglycerol O-acyltransferase 1 (DGAT1), mRNA [NM_012079]	TGTCCGAGTGCGAACACCTTGGGAAGGGGGTTCCTGGTGGTCCTGTGACAACCAGAGACC	8694	diacylglycerol O-acyltransferase 1	NM_012079	5.91401	5.80839	5.84959	4.92801	1.07596	1.89419
A_22_P00024092	16	SLC38A6	Homo sapiens solute carrier family 38, member 6 (SLC38A6), transcript variant 2, mRNA [NM_153811]	TCCCCAGGTGTTTCATTTGGTTTATCAGTGTTTAATTTGATGAATGCCATCATGGGAAGT	145389	solute carrier family 38, member 6	NM_153811	6.33996	5.95869	7.1346	7.05409	1.30249	1.0574
A_22_P00024174	12	USP49	Homo sapiens ubiquitin specific peptidase 49 (USP49), transcript variant 1, mRNA [NM_001286554]	AATGCAAGAATCTCAGAAACCCATCTCCAAGCTCAGGTGCAGTCCAGCAACAATGATGAA	25862	ubiquitin specific peptidase 49	NM_001286554	2.15619	4.67439	4.66797	4.51875	0.17456	1.10896
A_22_P00024298	7	SLC2A13	Homo sapiens solute carrier family 2 (facilitated glucose transporter), member 13 (SLC2A13), mRNA [NM_052885]	ACAAGATGAACAAATCAACTGTCATTGACTCCTCCTGTGTTCCAGTTAATAAAGCATCTA	114134	solute carrier family 2 (facilitated glucose transporter), member 13	NM_052885	4.26105	4.23989	3.99261	3.53011	1.01477	1.37793
A_22_P00024433	16	SASS6	Homo sapiens spindle assembly 6 homolog (C. elegans) (SASS6), mRNA [NM_194292]	GCCTCATTTTGTTTTCTTATTGACAAACAATACCTGGTAGCATTCTCTAAAGAGTCTTCT	163786	spindle assembly 6 homolog (C. elegans)	NM_194292	6.41147	6.03217	6.50148	5.90782	1.30071	1.50907
A_22_P00024715	16	GRAMD1A	Homo sapiens GRAM domain containing 1A (GRAMD1A), transcript variant 2, mRNA [NM_001136199]	TCTGAAGAAGGAAAAGACGGCCAAGCTGATCCCCAACGCCATCCAGATCTGCACGGAGAG	57655	GRAM domain containing 1A	NM_001136199	6.20232	6.53238	6.85674	6.95456	0.795499	0.934443
A_22_P00024841	16	NSFL1C	Homo sapiens NSFL1 (p97) cofactor (p47) (NSFL1C), transcript variant 2, mRNA [NM_018839]	CATGGAGCTGTAGCTGTGGAGCGAGTGACCAAGAGCCCTGGAGAGACCAGTAAACCGAGA	55968	NSFL1 (p97) cofactor (p47)	NM_018839	7.93795	7.91374	8.03594	8.20132	1.01692	0.891691
A_22_P00025064	9	NXF2	Homo sapiens nuclear RNA export factor 2 (NXF2), mRNA [NM_022053]	GTATTCGCCCCACTCATGATCACCATTTATTTTCATAATAAAGAGTGATGTTACATGTTG	56001	nuclear RNA export factor 2	NM_022053	1.85036	1.8457	5.09048	5.8914	1.00323	0.573982
A_22_P00025093	4	PTPN3	Homo sapiens protein tyrosine phosphatase, non-receptor type 3 (PTPN3), transcript variant 3, mRNA [NM_001145369]	TTTGGCCTTCTGAGAAAAGAGCTTCTAGTAATTGAACCATGGGAAACCCAGCTTCTGGAG	5774	protein tyrosine phosphatase, non-receptor type 3	NM_001145369	3.33691	5.66726	6.28348	7.85985	0.198835	0.335323
A_22_P00025162	13	CXorf23	Homo sapiens chromosome X open reading frame 23 (CXorf23), mRNA [NM_198279]	TGGAGGAGAGTCAAGGAAAACTCTTGGGACAACGAAGTCTTTGCTTCCATCTCAGGACCT	256643	chromosome X open reading frame 23	NM_198279	3.73924	5.45045	5.44961	4.84331	0.305405	1.52234
A_22_P00025224	16	MED6	Homo sapiens mediator complex subunit 6 (MED6), transcript variant 4, mRNA [NM_001284211]	CCACTAGCTGATTACTATATCATTGCTGGAGTGATCTATCAGGCACCAGACTTGGGATCA	10001	mediator complex subunit 6	NM_001284211	8.83606	9.08819	9.71509	9.56327	0.839659	1.11097
A_22_P00025286	16	COQ9	Homo sapiens coenzyme Q9 (COQ9), mRNA [NM_020312]	TGTTCCTGGGAGCCCCCTCAGAAAACTGCCTCACCTGAGACAAGTGCCTGCTGGACAGAG	57017	coenzyme Q9	NM_020312	11.6738	11.4288	11.862	11.8173	1.18508	1.03144
A_22_P00025333	16	MARCH8	Homo sapiens membrane-associated ring finger (C3HC4) 8, E3 ubiquitin protein ligase (MARCH8), transcript variant 2, mRNA [NM_145021]	GGGCCGAGCGGAACCAGGAATCGCAGAAACGGTCAGCGCCCAGGGCTCTAGGCCGGCCGC	220972	membrane-associated ring finger (C3HC4) 8, E3 ubiquitin protein ligase	NM_145021	6.6473	5.97462	6.09732	5.7702	1.59402	1.2545
A_22_P00025404	16	LSP1	Homo sapiens lymphocyte-specific protein 1 (LSP1), transcript variant 5, mRNA [NM_001242932]	AGCCTCCTCCTCCTGGGCTTCCAGGCTCTGCTGGTCAGACCTCCCTCCCTGCCCAACGGG	4046	lymphocyte-specific protein 1	NM_001242932	12.2634	12.34	12.4147	12.5647	0.948288	0.901288
A_22_P00025541	1	PKD1L3	Homo sapiens polycystic kidney disease 1-like 3 (PKD1L3), mRNA [NM_181536]	TCAAATTTGTTAGGAATCAGTTGGCCCCAAAAAACCTCATCTGAGCAAGCAGCCACGACA	342372	polycystic kidney disease 1-like 3	NM_181536	1.96497	6.47651	1.94493	3.57061	0.0438421	0.324056
A_22_P00025637	4	NRBP2	Homo sapiens nuclear receptor binding protein 2 (NRBP2), mRNA [NM_178564]	CTCCAACCAAAAGCCAAAAACCAAAGCAAGACTTACTAACGCATATCAAATAAATTAAAG	340371	nuclear receptor binding protein 2	NM_178564	7.5037	9.17554	2.53324	1.66362	0.313853	1.82718
A_22_P00025670	10	DCTN5	Homo sapiens dynactin 5 (p25) (DCTN5), transcript variant 4, mRNA [NM_001199743]	AGAGACATGGGAGTGAAATTCACACCCACTCTGGCTTTCATACCATGGGTCTGAACATTA	84516	dynactin 5 (p25)	NM_001199743	3.21407	4.46793	4.88714	4.28105	0.419326	1.52213
A_22_P00025796	16	NFATC3	Homo sapiens nuclear factor of activated T-cells, cytoplasmic, calcineurin-dependent 3 (NFATC3), transcript variant 1, mRNA [NM_173165]	CCCAAGTATTCAAATTACATCTATCTCTCCTAACTGTCATCAAGAATTAGATGCACATGA	4775	nuclear factor of activated T-cells, cytoplasmic, calcineurin-dependent 3	NM_173165	5.03101	5.25758	5.07724	5.35538	0.854663	0.824656
A_22_P00025888	1	ZNF154	Homo sapiens zinc finger protein 154 (ZNF154), transcript variant 1, mRNA [NM_001085384]	TCTTGATAGAGTTTGCCAGCCTTCAAATCACCAACTGTGGGAACCAACTGCCTCTTATTG	7710	zinc finger protein 154	NM_001085384	3.04273	1.99452	2.31779	3.09473	2.06795	0.583603
A_23_P100001	1	FAM174B	Homo sapiens family with sequence similarity 174, member B (FAM174B), mRNA [NM_207446]	ATCTCATGGAAAAGCTGGATTCCTCTGCCTTACGCAGAAACACCCGGGCTCCATCTGCCA	400451	family with sequence similarity 174, member B	NM_207446	1.62024	2.87041	3.48684	1.61292	0.420399	3.66526
A_23_P100022	13	SV2B	Homo sapiens synaptic vesicle glycoprotein 2B (SV2B), transcript variant 1, mRNA [NM_014848]	ATGTCGGCTGTGGAGGGTTAAAGGGATGAGGCTTTCCTTTGTTTAGCAAATCTGTTCACA	9899	synaptic vesicle glycoprotein 2B	NM_014848	1.9267	4.32491	6.15275	9.26395	0.189699	0.115727
A_23_P100056	3	RBPMS2	Homo sapiens RNA binding protein with multiple splicing 2 (RBPMS2), mRNA [NM_194272]	CCCTGTCAGATAAGTTTAATGTTTAGTTTGAGGCATGAAGAAGAAAAGGGTTTCCATTCT	348093	RNA binding protein with multiple splicing 2	NM_194272	6.49297	6.32631	1.82895	1.87019	1.12246	0.971816
A_23_P100074	16	AVEN	Homo sapiens apoptosis, caspase activation inhibitor (AVEN), mRNA [NM_020371]	GACCAGCCAGTTTACAAGCATGTCTCAAGCTAGTGTGTTCCATTATGCTCACAGCAGTAA	57099	apoptosis, caspase activation inhibitor	NM_020371	10.0191	9.24235	9.65855	9.00653	1.71327	1.57136
A_23_P100127	16	CASC5	Homo sapiens cancer susceptibility candidate 5 (CASC5), transcript variant 1, mRNA [NM_170589]	CGGTCTCTAGCAAAGATTCAGGCATTGGATCTGTTGCAGGTAAACTGAACCTAAGTCCTT	57082	cancer susceptibility candidate 5	NM_170589	9.88641	10.2124	9.64585	9.50831	0.797731	1.10003
A_23_P100141	16	UNKL	Homo sapiens unkempt family zinc finger-like (UNKL), transcript variant 1, mRNA [NM_001193388]	AGCAGAGGGGATCCAACGTCAGAGCTTTTAGAATTACTTTTTTAAGCAGCTGTCTTCTGG	64718	unkempt family zinc finger-like	NM_001193388	7.97604	8.63919	7.915	8.61754	0.631498	0.614493
A_23_P100189	9	PRM1	Homo sapiens protamine 1 (PRM1), mRNA [NM_002761]	GTAGAAGACACTAATTGCACAAAATAGCACATCCACCAAACTCCTGCCTGAGAATGTTAC	5619	protamine 1	NM_002761	7.48092	7.45982	2.69245	3.31647	1.01473	0.64886
A_23_P100196	16	USP10	Homo sapiens ubiquitin specific peptidase 10 (USP10), transcript variant 2, mRNA [NM_005153]	TTGGGGTTCGTGCACAACACAGCTTCTGTTGACTCTAACTTCCAAATCAAAATCATTTGG	9100	ubiquitin specific peptidase 10	NM_005153	11.9034	11.6509	11.6703	11.7409	1.19124	0.952249
A_23_P100203	16	HSBP1	Homo sapiens heat shock factor binding protein 1 (HSBP1), mRNA [NM_001537]	ACAAATTACATGGGGAACATAAAGGAGTGAGATCCTTCTGTGATAAAATGAATTCACCAC	3281	heat shock factor binding protein 1	NM_001537	10.507	9.33864	10.4528	9.13556	2.24749	2.49186
A_23_P100220	16	ESRP2	Homo sapiens epithelial splicing regulatory protein 2 (ESRP2), mRNA [NM_024939]	CTCAACTGCTGGCTCTTCTTCCCTTTGTATTTGTGTAAGGAGCACTGCACTCCCATAAAA	80004	epithelial splicing regulatory protein 2	NM_024939	5.35538	5.76393	5.71571	5.57651	0.753377	1.10129
A_23_P10025	5	NELL2	Homo sapiens NEL-like 2 (chicken) (NELL2), transcript variant 2, mRNA [NM_006159]	ACATCACCATGTAGAAGAATGGGCGTACAGTATATACCGTGACATCCTGAACCCTGGATA	4753	NEL-like 2 (chicken)	NM_006159	11.8388	11.9736	3.01837	3.09894	0.910772	0.945682
A_23_P100292	16	ZNF598	Homo sapiens zinc finger protein 598 (ZNF598), mRNA [NM_178167]	TGAATCTTTTTATGAGACAAGCTGAATCTGGGATCTCAAATTGCCTCTGACCTTTTATAA	90850	zinc finger protein 598	NM_178167	12.5528	12.4103	13.2977	12.622	1.10379	1.59738
A_23_P100315	16	DECR2	Homo sapiens 2,4-dienoyl CoA reductase 2, peroxisomal (DECR2), mRNA [NM_020664]	CATGGATCCCGAGACTTGTGTTCTCTTGGCTGAAAACACTGAGGTGCTCCCATCTGTGCG	26063	2,4-dienoyl CoA reductase 2, peroxisomal	NM_020664	9.82662	9.64881	10.718	10.3974	1.13116	1.24885
A_23_P100326	16	NPRL3	Homo sapiens nitrogen permease regulator-like 3 (S. cerevisiae) (NPRL3), transcript variant 2, mRNA [NM_001039476]	AGCTAGCTCCAGACATGGGTTGATCACCTAGAGGAGCTCTGGCTAAGGCACAGTTTTCTA	8131	nitrogen permease regulator-like 3 (S. cerevisiae)	NM_001039476	11.227	11.2005	10.3872	10.1259	1.01853	1.19861
A_23_P100344	16	ORC6	Homo sapiens origin recognition complex, subunit 6 (ORC6), transcript variant 1, mRNA [NM_014321]	ACATTCCAAACTGATAGTACATTGCCATCTCCAGGAAGACTTGACGGCTTTGGGATTTTG	23594	origin recognition complex, subunit 6	NM_014321	9.55518	9.06908	9.32766	10.0586	1.40065	0.602533
A_23_P100392	16	TCEB2	Homo sapiens transcription elongation factor B (SIII), polypeptide 2 (18kDa, elongin B) (TCEB2), transcript variant 1, mRNA [NM_007108]	CAGACGATGGCCAAGAGCAGAAACACAAGCTGGAGCCAGTGTCCTGGTTTGACAGCATGT	6923	transcription elongation factor B (SIII), polypeptide 2 (18kDa, elongin B)	NM_007108	9.63927	9.46082	9.60182	8.38814	1.13167	2.31928
A_23_P100420	15	ZCCHC14	Homo sapiens zinc finger, CCHC domain containing 14 (ZCCHC14), mRNA [NM_015144]	GCTTTGGTACTGAAACTGGACACCTTGTGTACTCGATACCTTCACAGCTTCTATTGGACA	23174	zinc finger, CCHC domain containing 14	NM_015144	9.30958	8.80225	9.55154	8.10632	1.42142	2.72305
A_23_P100441	16	FAM192A	Homo sapiens family with sequence similarity 192, member A (FAM192A), mRNA [NM_024946]	GTCATCATCTTTATGTGGCATGACTCTTAAGAGGCCATTACTGTATCTCATGGCCTCTTG	80011	family with sequence similarity 192, member A	NM_024946	10.5582	10.3941	10.1173	9.75381	1.12045	1.2865
A_23_P100455	16	MTHFSD	Homo sapiens methenyltetrahydrofolate synthetase domain containing (MTHFSD), transcript variant 3, mRNA [NM_022764]	TTTTTAGCCAGAGGGTTTTACCAAGTGTTCTTTGAAGCACATTACGATGCCTCGAGAGGG	64779	methenyltetrahydrofolate synthetase domain containing	NM_022764	8.64557	9.17212	8.08055	7.82769	0.694214	1.19157
A_23_P100486	16	VKORC1	Homo sapiens vitamin K epoxide reductase complex, subunit 1 (VKORC1), transcript variant 2, mRNA [NM_206824]	GACCTCATCTGCTTTGCTTTGGCATGTGAGCCTTGCCTAAGGGGGCATATCTGGGTCCCT	79001	vitamin K epoxide reductase complex, subunit 1	NM_206824	11.3483	10.844	12.0174	12.1502	1.41845	0.912051
A_23_P100499	15	ROGDI	Homo sapiens rogdi homolog (Drosophila) (ROGDI), transcript variant 1, mRNA [NM_024589]	CAGCAGATCCAGGATGCCAGAAACCATGTGAGCCAAGCCATTTACCTGCTTACCAGCCGG	79641	rogdi homolog (Drosophila)	NM_024589	4.92183	4.29813	6.24422	6.10612	1.54082	1.10046
A_23_P100501	16	HMOX2	Homo sapiens heme oxygenase (decycling) 2 (HMOX2), transcript variant 3, mRNA [NM_002134]	CTAGCTGCTGGACTCTTGGCCTGGTACTACATGTGAAGCACCCATCATGCCACACCGGTA	3163	heme oxygenase (decycling) 2	NM_002134	11.4641	11.3928	11.5521	11.4946	1.05066	1.04063
A_23_P100517	16	TMEM170A	Homo sapiens transmembrane protein 170A (TMEM170A), mRNA [NM_145254]	AGACATTTTGCGTCTTGGTGGTCTCCTTTTTACGGATTTTAGCTACTCTATAGCATACAT	124491	transmembrane protein 170A	NM_145254	8.28049	8.6712	9.35699	9.76026	0.762754	0.756145
A_23_P100602	16	TBCD	Homo sapiens tubulin folding cofactor D (TBCD), mRNA [NM_005993]	AAGTTGCTTGCGCTCTGTAAGAAAGAAATCAAGAATTCAAAAGATATCCAGAAGCTCCTG	6904	tubulin folding cofactor D	NM_005993	7.74377	7.61849	8.79187	8.68877	1.09072	1.07408
A_23_P100632	16	HN1	Homo sapiens hematological and neurological expressed 1 (HN1), transcript variant 3, mRNA [NM_001002033]	TTCCTCCATGCTTGTGAACTGCACAACTTGAGCCTGACTGTACATCTCTTGGATTTGTTT	51155	hematological and neurological expressed 1	NM_001002033	14.5231	14.7675	15.8375	15.6268	0.84419	1.15722
A_23_P100642	9	PNMT	Homo sapiens phenylethanolamine N-methyltransferase (PNMT), transcript variant 1, mRNA [NM_002686]	CACCTTCAGACAGGCGTAGATGATGTCAAGGGCGTCTTCTTCGCCTGGGCTCAGAAGGTT	5409	phenylethanolamine N-methyltransferase	NM_002686	3.11881	3.0474	5.21534	4.31084	1.05074	1.87191
A_23_P100654	16	ZBTB4	Homo sapiens zinc finger and BTB domain containing 4 (ZBTB4), transcript variant 1, mRNA [NM_020899]	GTATTTGAGCTGGGGAATTTGAATATTGTGAGTTTCAGATGTTGGAAATTTGGGATTTTG	57659	zinc finger and BTB domain containing 4	NM_020899	8.37843	8.88266	6.21397	5.82365	0.705038	1.31068
A_23_P100660	15	SERPINF1	Homo sapiens serpin peptidase inhibitor, clade F (alpha-2 antiplasmin, pigment epithelium derived factor), member 1 (SERPINF1), mRNA [NM_002615]	CTTCGTACTGAGGGACACAGACACAGGGGCCCTTCTCTTCATTGGCAAGATTCTGGACCC	5176	serpin peptidase inhibitor, clade F (alpha-2 antiplasmin, pigment epithelium derived factor), member 1	NM_002615	9.91284	9.34078	4.53473	4.87521	1.48665	0.78978
A_23_P100676	16	SMG6	Homo sapiens SMG6 nonsense mediated mRNA decay factor (SMG6), transcript variant 1, mRNA [NM_017575]	AGCTGGTACCTCAGTGGGGAGGCTTCCTTACCAAGAATGAGTTCCTGAAACCCAGGGCCA	23293	SMG6 nonsense mediated mRNA decay factor	NM_017575	6.67713	6.39549	5.33929	5.67358	1.21557	0.793172
A_23_P100704	16	MAPK7	Homo sapiens mitogen-activated protein kinase 7 (MAPK7), transcript variant 1, mRNA [NM_139033]	GTGAGGCTCGGCTTGGATTATTCTGCAGGTTCATCTCAGACCCACCTTTCAGCCTTAAGC	5598	mitogen-activated protein kinase 7	NM_139033	8.13125	7.92396	9.00319	9.12127	1.15452	0.921414
A_23_P100730	15	SKAP1	Homo sapiens src kinase associated phosphoprotein 1 (SKAP1), transcript variant 1, mRNA [NM_003726]	AGAAGGAAACCTTGGGAGGAGGACATTACTGGTTGTTCTGGCTGGTTTGAAAAGCACAAA	8631	src kinase associated phosphoprotein 1	NM_003726	5.14209	1.88038	11.9514	11.3244	9.5912	1.54428
A_23_P100764	16	SLC25A39	Homo sapiens solute carrier family 25, member 39 (SLC25A39), transcript variant 2, mRNA [NM_016016]	GATCAGCACCTATGAGTTCGGCAAAAGCTTCTTCCAGAGGCTGAACCAGGACCGGCTTCT	51629	solute carrier family 25, member 39	NM_016016	10.7444	10.7787	10.1811	10.3514	0.976481	0.888628
A_23_P10077	16	PNPLA2	Homo sapiens patatin-like phospholipase domain containing 2 (PNPLA2), mRNA [NM_020376]	CGCCTCCATTACCACTGCGCAGTGAGATGAGGGGACTCACAGTTGCCAAGAGGGGTCTTT	57104	patatin-like phospholipase domain containing 2	NM_020376	8.9276	8.85272	8.52325	9.26677	1.05328	0.597281
A_23_P100795	16	STAT3	Homo sapiens signal transducer and activator of transcription 3 (acute-phase response factor) (STAT3), transcript variant 3, mRNA [NM_213662]	AGTTTCTGTGGAATTCTGTTTGTTAAATCAAATTAGCTGGTCTCTGAATTAAGGGGGAGA	6774	signal transducer and activator of transcription 3 (acute-phase response factor)	NM_213662	5.89653	6.56286	8.05489	8.23587	0.630106	0.882102
A_23_P10081	10	ARL13B	Homo sapiens ADP-ribosylation factor-like 13B (ARL13B), transcript variant 1, mRNA [NM_182896]	TGCACTTAAGAATGGCATCCATAAGATTCTGTATTTGGCATTTAGACTAACTTCTAGATG	200894	ADP-ribosylation factor-like 13B	NM_182896	1.84562	1.83602	5.01278	4.2627	1.00668	1.68189
A_23_P100868	16	MYO19	Homo sapiens myosin XIX (MYO19), transcript variant 3, mRNA [NM_001033580]	AAGGTACCGCATGATCAGAAGAGAGAACTAGTGCTACCGCCTTGCTTGTCTAGTACATTA	80179	myosin XIX	NM_001033580	10.2828	10.6633	9.57118	9.84649	0.768195	0.826273
A_23_P100883	16	SUZ12	Homo sapiens SUZ12 polycomb repressive complex 2 subunit (SUZ12), mRNA [NM_015355]	CTTGATTGGTAAGCTCTCCAAATGATGAGTTCTAGTAAACTCTGATTTTTGCCTCTGGAT	23512	SUZ12 polycomb repressive complex 2 subunit	NM_015355	11.8123	12.1157	12.3513	12.2581	0.810362	1.06671
A_23_P100912	14	GIT1	Homo sapiens G protein-coupled receptor kinase interacting ArfGAP 1 (GIT1), transcript variant 2, mRNA [NM_014030]	CACAGGCCCCAACCTGTGTGCTGGGGTCCCCAGCAGCAAACACTGGAAAGTCTGTTTTTT	28964	G protein-coupled receptor kinase interacting ArfGAP 1	NM_014030	4.94102	5.14878	4.36403	4.40349	0.865879	0.973023
A_23_P100963	16	SPNS3	Homo sapiens spinster homolog 3 (Drosophila) (SPNS3), mRNA [NM_182538]	TGCCTCGGTTCCTCTTTGGCTGTCCTCGGGGACTCCGGCTGAGGCACATCTGCCACTTTT	201305	spinster homolog 3 (Drosophila)	NM_182538	5.67994	5.96219	5.20653	4.86152	0.822312	1.27016
A_23_P101013	16	TMC6	Homo sapiens transmembrane channel-like 6 (TMC6), transcript variant 2, mRNA [NM_007267]	CAGATCAGCAATGAGGGTGAGGACAAAATCTTCTTAATCAACAAGCTTCACTCCATCTAC	11322	transmembrane channel-like 6	NM_007267	10.4387	10.6281	9.52471	9.71922	0.87697	0.873866
A_23_P101073	1	OR1E1	Homo sapiens olfactory receptor, family 1, subfamily E, member 1 (OR1E1), mRNA [NM_003553]	TGCTCTGCTGAAGCTGGCCTTCTCTGACACTCGAGTTAATGAATGGGTGATATTTATCAT	8387	olfactory receptor, family 1, subfamily E, member 1	NM_003553	2.67638	3.07693	3.42798	2.75955	0.757569	1.58935
A_23_P101093	15	COPZ2	Homo sapiens coatomer protein complex, subunit zeta 2 (COPZ2), mRNA [NM_016429]	GGTTCTTCAGTCTGCCAAGGAACAAATTAAATGGTCGTTATTGAAATGAAGGCTGTGGAT	51226	coatomer protein complex, subunit zeta 2	NM_016429	8.14439	7.74196	7.06027	7.45756	1.32173	0.759282
A_23_P101111	16	CTDP1	Homo sapiens CTD (carboxy-terminal domain, RNA polymerase II, polypeptide A) phosphatase, subunit 1 (CTDP1), transcript variant 1, mRNA [NM_004715]	TTGTGTACCAGAGCACATTCCTTAGGGGACGGCTTTGGGGGTCCCACGAGACATGGACTA	9150	CTD (carboxy-terminal domain, RNA polymerase II, polypeptide A) phosphatase, subunit 1	NM_004715	8.00915	7.76729	9.07237	9.05938	1.18251	1.00905
A_23_P101131	4	GRP	Homo sapiens gastrin-releasing peptide (GRP), transcript variant 1, mRNA [NM_002091]	TTTTTTATATCTAGGCTACCTGTTGGTTAGATTCAAGGCCCCGAGCTGTTACCATTCACA	2922	gastrin-releasing peptide	NM_002091	1.81051	1.81499	1.82786	4.69839	0.996895	0.136736
A_23_P101185	16	NARS	Homo sapiens asparaginyl-tRNA synthetase (NARS), mRNA [NM_004539]	AGGATTTGAAGTAAGAACATAATTTTGGGGAGAGTTTTTTAGTGATTCACAGTATCCCTC	4677	asparaginyl-tRNA synthetase	NM_004539	12.1291	12.2349	12.1424	12.0694	0.929268	1.05188
A_23_P101208	5	CYB5A	Homo sapiens cytochrome b5 type A (microsomal) (CYB5A), transcript variant 2, mRNA [NM_001914]	CACGGGAGAAAAGAAGCCATTGCTAACTACTTCAACTGACAGAAACCTTCACTTGAAAAC	1528	cytochrome b5 type A (microsomal)	NM_001914	11.5779	11.957	1.8301	1.90157	0.768968	0.951667
A_23_P101237	16	C18orf21	Homo sapiens chromosome 18 open reading frame 21 (C18orf21), transcript variant 1, mRNA [NM_031446]	ACTCCTACAAGTAAACTCAGCCTGAAGACACCAGAGAGAAGGACTGCAAACCCAAATCAT	83608	chromosome 18 open reading frame 21	NM_031446	11.3453	11.5198	11.5811	12.0981	0.886054	0.698845
A_23_P101246	16	VSIG10L	Homo sapiens V-set and immunoglobulin domain containing 10 like (VSIG10L), mRNA [NM_001163922]	ACATCATTAACTCAGCACTTAACCCAGAGCCTCACACACAGCAGGCAATCAATAAATATT	147645	V-set and immunoglobulin domain containing 10 like	NM_001163922	9.38477	9.06349	7.23214	7.95048	1.24944	0.607794
A_23_P101281	16	ZNF587	Homo sapiens zinc finger protein 587 (ZNF587), transcript variant 1, mRNA [NM_032828]	ACACAAAACCTTTGTAATCAGGGGGAATTAAAGAGCCTTCCTGGAAAATGGAGGTTGCAA	84914	zinc finger protein 587	NM_032828	9.38499	10.0674	10.228	10.2311	0.623112	0.99781
A_23_P101297	16	EML2	Homo sapiens echinoderm microtubule associated protein like 2 (EML2), transcript variant 2, mRNA [NM_012155]	ACATGGAATGGGCCACAGCTACTTGTGTCCTAGGGTTTGGGGTGTTTGGGATCTGGTCTG	24139	echinoderm microtubule associated protein like 2	NM_012155	5.33566	5.48628	7.08127	7.70169	0.900859	0.650483
A_23_P101319	1	ZNF285	Homo sapiens zinc finger protein 285 (ZNF285), transcript variant 2, mRNA [NM_152354]	TCAACTGCTGTATGCTACAATGGCAAAGAGGTTACTTTTGACAAATGGGTGGTTTGTGGT	26974	zinc finger protein 285	NM_152354	1.67665	1.6699	1.6521	5.0434	1.0047	0.0953056
A_23_P101332	16	KRI1	Homo sapiens KRI1 homolog (S. cerevisiae) (KRI1), mRNA [NM_023008]	ACAGGTCTCGCACCCACAAGTACTATCTGCTGCAGAGATCCTCTCATCTGTGGCCAGGCA	65095	KRI1 homolog (S. cerevisiae)	NM_023008	11.0601	11.4092	11.1633	11.2438	0.785046	0.945761
A_23_P101342	16	ATG4D	Homo sapiens autophagy related 4D, cysteine peptidase (ATG4D), transcript variant 1, mRNA [NM_032885]	GGACTTTGTGTTTTTATAAAGGGAGGGGATGAGGGGAAAGATACAACACTATTTATTTTT	84971	autophagy related 4D, cysteine peptidase	NM_032885	8.46791	8.2182	8.04543	7.98644	1.18897	1.04173
A_23_P10135	16	NKIRAS2	Homo sapiens NFKB inhibitor interacting Ras-like 2 (NKIRAS2), transcript variant 1, mRNA [NM_001001349]	CCCAGACAGGAAGCAGAGTCACCACGCAGCAGTGTCCCTTCTTGGGTCTGAGTTCCTATT	28511	NFKB inhibitor interacting Ras-like 2	NM_001001349	9.46082	9.29278	9.80957	9.83071	1.12352	0.985459
A_23_P101351	16	ZNF426	Homo sapiens zinc finger protein 426 (ZNF426), transcript variant 1, mRNA [NM_024106]	AATAAATGTGGGAAAGCTCTCATTTGTTCCAGTTCACTTTAAAGACATGAATGAACTCAC	79088	zinc finger protein 426	NM_024106	6.85229	8.3116	10.989	11.2418	0.363668	0.839236
A_23_P101380	16	B3GNT8	Homo sapiens UDP-GlcNAc:betaGal beta-1,3-N-acetylglucosaminyltransferase 8 (B3GNT8), mRNA [NM_198540]	GGCCTGGGCAGGAAAGATGGGGTGGTGGACTGTTTTTGCCTACTTTTTGTTTTTGAAAAA	374907	UDP-GlcNAc:betaGal beta-1,3-N-acetylglucosaminyltransferase 8	NM_198540	5.73932	4.73594	5.51159	5.25341	2.00469	1.19597
A_23_P101392	16	TMEM38A	Homo sapiens transmembrane protein 38A (TMEM38A), mRNA [NM_024074]	TTCACAGAATCCTGGCAGCAGCTCCAGTCAAGAATGTCACTGGTTGGCATGATATTCTTA	79041	transmembrane protein 38A	NM_024074	10.8154	11.3686	10.4704	10.2017	0.68149	1.20478
A_23_P101407	12	C3	Homo sapiens complement component 3 (C3), mRNA [NM_000064]	GTGCCGCTGTGCTGAGGAGAATTGCTTCATACAAAAGTCGGATGACAAGGTCACCCTGGA	718	complement component 3	NM_000064	4.34166	4.72413	3.71532	3.53715	0.767122	1.13145
A_23_P101461	16	CCDC130	Homo sapiens coiled-coil domain containing 130 (CCDC130), mRNA [NM_030818]	GTGGAGTTATTTATTTGGTCCTGGTGAGGGTGTTTGTGCCTTGTGAGACTCCGTACATTA	81576	coiled-coil domain containing 130	NM_030818	12.0293	12.4397	12.9247	13.3931	0.752419	0.722753
A_23_P101476	15	ZNF442	Homo sapiens zinc finger protein 442 (ZNF442), mRNA [NM_030824]	CCTTGCATAGACATAAAAGGACTCACTGGAGAGATACTCTATAAATGTGGAAAAGCATTC	79973	zinc finger protein 442	NM_030824	4.56642	5.28687	6.58101	6.00734	0.606908	1.4883
A_23_P101480	16	MAST1	Homo sapiens microtubule associated serine/threonine kinase 1 (MAST1), mRNA [NM_014975]	GGCCCCGCGCTGTACAGCCTCCGTATACATATGTACACATATAAATAAAGTGCGTCCGTG	22983	microtubule associated serine/threonine kinase 1	NM_014975	7.0667	7.64289	8.28416	7.6319	0.670732	1.57162
A_23_P101516	16	KCNC3	Homo sapiens potassium channel, voltage gated Shaw related subfamily C, member 3 (KCNC3), mRNA [NM_004977]	GGGGGTGCTGACCATCGCCATGCCTGTGCCCGTCATTGTCAACAACTTTGGCATGTACTA	3748	potassium channel, voltage gated Shaw related subfamily C, member 3	NM_004977	6.95668	7.45429	8.60541	7.65025	0.708276	1.93878
A_23_P101532	16	RPS11	Homo sapiens ribosomal protein S11 (RPS11), mRNA [NM_001015]	CCACAAGAACATGTCTGTACACCTGTCCCCCTGCTTCAGGGACGTCCAGATCGGTGACAT	6205	ribosomal protein S11	NM_001015	17.8836	17.8188	17.9147	18.0424	1.04596	0.915265
A_23_P101551	16	BCAT2	Homo sapiens branched chain amino-acid transaminase 2, mitochondrial (BCAT2), transcript variant a, mRNA [NM_001190]	TCCCTACCAATGACTCACCTGAAGTGCAATACGAAATAAAAGGCCAGCGGGCGGCGTCTG	587	branched chain amino-acid transaminase 2, mitochondrial	NM_001190	8.72629	9.37145	10.7486	10.814	0.639422	0.955673
A_23_P10156	16	CHMP6	Homo sapiens charged multivesicular body protein 6 (CHMP6), mRNA [NM_024591]	CCAGTTTGAAGGTGGCGGGCCAGGGGCTTTCTTGCTGAATTGACGACTCCGAGAGCCCTG	79643	charged multivesicular body protein 6	NM_024591	7.55095	7.32931	7.66503	8.01653	1.16605	0.783766
A_23_P101615	16	ZNF565	Homo sapiens zinc finger protein 565 (ZNF565), mRNA [NM_001042474]	GGAGTGTGGAATGGCCTTTATTCGTAGTTCACAACTTACCGAACATCAGAGAATTCATCC	147929	zinc finger protein 565	NM_001042474	6.28866	6.66506	8.145	8.28962	0.770361	0.904616
A_23_P101623	11	ZNF667	Homo sapiens zinc finger protein 667 (ZNF667), transcript variant 1, mRNA [NM_022103]	ATTCTTCAGAGAAACCCTATGAATGTAGTAAATGTGGGAAGGCATATGGTCGGAGTTCAT	63934	zinc finger protein 667	NM_022103	3.74539	3.9985	4.74505	4.66322	0.839085	1.05836
A_23_P101642	11	PTPRH	Homo sapiens protein tyrosine phosphatase, receptor type, H (PTPRH), transcript variant 1, mRNA [NM_002842]	TCTGAGGCAGGAAGGAATTTGGGTCTGGAGTTCTGGCTACTTGAGGACCAAAGGCAGGAA	5794	protein tyrosine phosphatase, receptor type, H	NM_002842	1.85438	3.01739	4.54672	5.36307	0.446579	0.567876
A_23_P101655	16	ACTN4	Homo sapiens actinin, alpha 4 (ACTN4), mRNA [NM_004924]	TAAATATGTATGATGTGTTGTGCTTTTTTAACCAAGGAGGGGCCAGTGGATTCCCACAGC	81	actinin, alpha 4	NM_004924	8.99252	8.86017	9.52607	9.53451	1.09608	0.994163
A_23_P101699	16	HDGFRP2	Homo sapiens hepatoma-derived growth factor-related protein 2 (HDGFRP2), transcript variant 2, mRNA [NM_032631]	AGAAGAAAGAGCCCTCCGTGGAGGAGAAGCTGCAGAAGCTGCACAGTGAGATCAAGTTTG	84717	hepatoma-derived growth factor-related protein 2	NM_032631	7.70297	7.43917	7.07153	6.74107	1.20063	1.25741
A_23_P101707	16	PLIN3	Homo sapiens perilipin 3 (PLIN3), transcript variant 1, mRNA [NM_005817]	TCTCTATAATGCAGCTGTGCTCTGGAGTCCTCAACCCGGGGCTCATTTCAAACTTATTTT	10226	perilipin 3	NM_005817	10.3657	10.0643	9.56289	9.67617	1.23238	0.924484
A_23_P101737	16	DOT1L	Homo sapiens DOT1-like histone H3K79 methyltransferase (DOT1L), mRNA [NM_032482]	CGGGCGGCGCCTGGGAGTGGCTCTTGCTCAGGAATTGATAGGAACCCTAAAAACTAGGAT	84444	DOT1-like histone H3K79 methyltransferase	NM_032482	7.27917	7.57112	7.53243	7.30038	0.816797	1.1745
A_23_P101742	16	MRPL54	Homo sapiens mitochondrial ribosomal protein L54 (MRPL54), mRNA [NM_172251]	CTGAAACCGGATGCTGAGTACCCTGAATGGCTGTTCGAGATGAACTTGGGTCCCCCAAAG	116541	mitochondrial ribosomal protein L54	NM_172251	11.8879	11.7362	11.428	12.1013	1.11087	0.627089
A_23_P101774	6	SLC5A5	Homo sapiens solute carrier family 5 (sodium/iodide cotransporter), member 5 (SLC5A5), mRNA [NM_000453]	GCAGACAGCATCAGTGGCCCCCAAGGAAGAAGTGGCCATCCTGGATGACAACTTGGTCAA	6528	solute carrier family 5 (sodium/iodide cotransporter), member 5	NM_000453	4.2431	4.96134	4.26624	3.47436	0.60784	1.73133
A_23_P101796	5	SYDE1	Homo sapiens synapse defective 1, Rho GTPase, homolog 1 (C. elegans) (SYDE1), transcript variant 1, mRNA [NM_033025]	GGGCTTCCCCTTTTGTTGCCAAAAAGGTAGTTCTCGCGCTTGCTAGGCTGGCCTCTCTTG	85360	synapse defective 1, Rho GTPase, homolog 1 (C. elegans)	NM_033025	3.34741	1.76017	3.48563	3.1286	3.00474	1.28079
A_23_P101811	16	ZNF14	Homo sapiens zinc finger protein 14 (ZNF14), mRNA [NM_021030]	TATGAAAGGAGTCAGAGTGGGGTGAAAGTCTATAAATGTAAGACATTTGGGAAAGCCTTC	7561	zinc finger protein 14	NM_021030	7.54086	8.32801	9.08993	9.43132	0.579488	0.789279
A_23_P10182	1	ACOX2	Homo sapiens acyl-CoA oxidase 2, branched chain (ACOX2), mRNA [NM_003500]	GGAGATCCAAGCTATGAAATAACCAACAGTATTCAAGAAGCAACCAGCACCATCATGTGA	8309	acyl-CoA oxidase 2, branched chain	NM_003500	1.95876	1.93383	2.23079	3.66339	1.01743	0.370461
A_23_P101829	16	LPAR2	Homo sapiens lysophosphatidic acid receptor 2 (LPAR2), mRNA [NM_004720]	ATGGTTTAGGCTGTGAGTCCTGCAATGTCCTGGCTGTAGAAAAGTACTTCCTACTGTTGG	9170	lysophosphatidic acid receptor 2	NM_004720	6.41656	7.02897	6.67654	6.52068	0.654104	1.11408
A_23_P101905	15	APC2	Homo sapiens adenomatosis polyposis coli 2 (APC2), mRNA [NM_005883]	TAAGGACGACACCGTCAGCTGTCCGACTCGCACACATTTAATAAACTGAGCTCTTGCATT	10297	adenomatosis polyposis coli 2	NM_005883	9.31591	7.16306	6.64301	6.3878	4.44704	1.19352
A_23_P10194	10	SEZ6L2	Homo sapiens seizure related 6 homolog (mouse)-like 2 (SEZ6L2), transcript variant 2, mRNA [NM_201575]	CTGGCTGTGTAAATAGTCTCCCTATCCCACGAGGGGGCTTTGATGGCCCTGGAGATCCTA	26470	seizure related 6 homolog (mouse)-like 2	NM_201575	3.82229	3.73078	4.38338	3.41421	1.06549	1.95771
A_23_P101950	16	MDH1	Homo sapiens malate dehydrogenase 1, NAD (soluble) (MDH1), transcript variant 2, mRNA [NM_005917]	TTAAAGATTACGTGCTTCTTGGTACAGGTTTGTGAATGACAGTTTATCGTCATGCTGTTA	4190	malate dehydrogenase 1, NAD (soluble)	NM_005917	15.1138	14.6545	15.2122	15.3071	1.37488	0.936376
A_23_P101960	16	ZFP36L2	Homo sapiens ZFP36 ring finger protein-like 2 (ZFP36L2), mRNA [NM_006887]	AGCAAAAAAGTCGAACTTTTTCTGTTGAACAAAATATTCACAACAGGGCAGTTGTGATAC	678	ZFP36 ring finger protein-like 2	NM_006887	9.55154	10.2073	11.3552	10.8882	0.634758	1.38224
A_23_P101972	12	CAPN13	Homo sapiens calpain 13 (CAPN13), mRNA [NM_144575]	CTCTGAGTCCCCTGTCACCAGTTGGATTCATTTCTTGGAAGAGCCAGAATGAGCCACTTT	92291	calpain 13	NM_144575	4.89058	2.58802	5.08664	3.78998	4.9333	2.45658
A_23_P102000	16	CXCR4	Homo sapiens chemokine (C-X-C motif) receptor 4 (CXCR4), transcript variant 1, mRNA [NM_001008540]	TGCTGGTTTTTCAGTTTTCAGGAGTGGGTTGATTTCAGCACCTACAGTGTACAGTCTTGT	7852	chemokine (C-X-C motif) receptor 4	NM_001008540	10.9234	12.7832	12.3252	11.8226	0.275522	1.41684
A_23_P102037	16	COQ10B	Homo sapiens coenzyme Q10 homolog B (S. cerevisiae) (COQ10B), mRNA [NM_025147]	CATCACCATTGCTAGAATACTGGCATGATTCTTCTGAGCAGAAGTTGAAACTGTAAATTT	80219	coenzyme Q10 homolog B (S. cerevisiae)	NM_025147	6.83649	6.78478	7.22324	7.46773	1.03649	0.844116
A_23_P102060	16	SSFA2	Homo sapiens sperm specific antigen 2 (SSFA2), transcript variant 2, mRNA [NM_006751]	GTATCATCCAAATAATGGGGCCTATGACTTGAATGAATAGAAATGAATAAGCTGGTGTTT	6744	sperm specific antigen 2	NM_006751	8.55298	9.13919	9.50019	9.66434	0.666089	0.892452
A_23_P102109	16	TUBA4A	Homo sapiens tubulin, alpha 4a (TUBA4A), transcript variant 1, mRNA [NM_006000]	GCACTGATATGTGGGTGAGGGCATGGAGGAGGGTGAGTTCTCCAAGGCCCATGAGGATAT	7277	tubulin, alpha 4a	NM_006000	11.9489	12.1843	10.351	10.1804	0.849431	1.1255
A_23_P102117	16	WNT10A	Homo sapiens wingless-type MMTV integration site family, member 10A (WNT10A), mRNA [NM_025216]	AAGAAATAGACATAACTGAGCTGAAGTAATTCCATAAAGGGCCCAGACAGCCTCCTCCAC	80326	wingless-type MMTV integration site family, member 10A	NM_025216	10.4462	9.69432	8.46844	9.45239	1.68402	0.505593
A_23_P102122	16	ARPC2	Homo sapiens actin related protein 2/3 complex, subunit 2, 34kDa (ARPC2), transcript variant 1, mRNA [NM_152862]	AAGCGGCTGGCAACTGAAGGCTGGAACACTTGCTACTGGATAATCGTAGCTTTTAATGTT	10109	actin related protein 2/3 complex, subunit 2, 34kDa	NM_152862	15.4149	15.3646	13.799	14.0808	1.03552	0.822568
A_23_P102202	16	MSH6	Homo sapiens mutS homolog 6 (MSH6), transcript variant 1, mRNA [NM_000179]	GAAGTTTGCCTGGCTAGTGAAAGGTCAACTGTAGATGCTGAAGCTGTCCATAAATTGCTG	2956	mutS homolog 6	NM_000179	13.9217	13.7229	13.6906	13.1473	1.14768	1.45731
A_23_P102235	16	SNRPG	Homo sapiens small nuclear ribonucleoprotein polypeptide G (SNRPG), mRNA [NM_003096]	ACAACAGAACAATATTGGAATGGTGGTAATACGAGGAAATAGTATCATCATGTTAGAAGC	6637	small nuclear ribonucleoprotein polypeptide G	NM_003096	13.3783	13.3162	13.4767	13.3652	1.04399	1.08032
A_23_P102242	16	MARCH7	Homo sapiens membrane-associated ring finger (C3HC4) 7, E3 ubiquitin protein ligase (MARCH7), transcript variant 2, mRNA [NM_022826]	GGAGACCATAACAGGACATTTGATATTGCCTAACTTCATATAAGACAGATGGATGATCTG	64844	membrane-associated ring finger (C3HC4) 7, E3 ubiquitin protein ligase	NM_022826	7.98005	9.34835	9.7608	10.0581	0.387347	0.81375
A_23_P102258	16	MRPL53	Homo sapiens mitochondrial ribosomal protein L53 (MRPL53), mRNA [NM_053050]	GGCGCTGATACTGGTCGCTGACAGCGCCAAAGAGACCAACAAGATGATTTTAGCGTGGAC	116540	mitochondrial ribosomal protein L53	NM_053050	13.9657	13.8402	13.3559	13.9136	1.0909	0.679394
A_23_P102262	16	MRPL19	Homo sapiens mitochondrial ribosomal protein L19 (MRPL19), mRNA [NM_014763]	CATCACCAGAATGGTCTTTAATGAGCATGGAACCTGAGCAAAGGGAATAGGTGGGATGAA	9801	mitochondrial ribosomal protein L19	NM_014763	12.088	11.8267	12.0429	11.9655	1.19855	1.05514
A_23_P10232	16	BANK1	Homo sapiens B-cell scaffold protein with ankyrin repeats 1 (BANK1), transcript variant 1, mRNA [NM_017935]	GCACATTTTTGCTTTTTAAGTAGCTGGTTCATTTTCTGAATTTCTCACATTCAGAGTTCC	55024	B-cell scaffold protein with ankyrin repeats 1	NM_017935	9.80512	10.7472	8.5487	10.1738	0.520478	0.324196
A_23_P102320	16	NUP35	Homo sapiens nucleoporin 35kDa (NUP35), transcript variant 1, mRNA [NM_138285]	ATGTCCTGTCACAGAGTGTCCTCTTGGTGTATTCTAAAACGAGCATTCTTTTAAAAAACC	129401	nucleoporin 35kDa	NM_138285	10.9444	10.5156	9.3711	9.0224	1.34611	1.27342
A_23_P102351	13	CHST10	Homo sapiens carbohydrate sulfotransferase 10 (CHST10), mRNA [NM_004854]	ACAGCCCAGCAGGGAGGAAGCATCACACAGCGTTAGGAGCCGTTTCCTTCAGGTGTTAAG	9486	carbohydrate sulfotransferase 10	NM_004854	1.85107	3.42111	4.41569	4.80067	0.336799	0.765788
A_23_P102364	10	NGEF	Homo sapiens neuronal guanine nucleotide exchange factor (NGEF), transcript variant 1, mRNA [NM_019850]	AGGAGCCCAGGTGTTTTAAGGAATGAATTGGTCACTGCATCTTGTATCGATTATGGTTCT	25791	neuronal guanine nucleotide exchange factor	NM_019850	2.66701	3.07706	6.30876	5.77924	0.752599	1.44345
A_23_P102404	16	CCT7	Homo sapiens chaperonin containing TCP1, subunit 7 (eta) (CCT7), transcript variant 1, mRNA [NM_006429]	GGGGTACATGGTATGGAGTAGACATCAACAACGAGGACATTGCTGACAACTTTGAAGCTT	10574	chaperonin containing TCP1, subunit 7 (eta)	NM_006429	13.6999	13.4296	14.5989	14.1399	1.2061	1.37462
A_23_P102412	16	PLEKHA3	Homo sapiens pleckstrin homology domain containing, family A (phosphoinositide binding specific) member 3 (PLEKHA3), mRNA [NM_019091]	TACGTTGTTCTTTACGTTGTTCTAGAAAAGAGATTTTAATGCTGTAGTGACTTTGCTCAC	65977	pleckstrin homology domain containing, family A (phosphoinositide binding specific) member 3	NM_019091	9.23204	9.19077	8.48211	8.96571	1.02902	0.715193
A_23_P102420	16	CCT4	Homo sapiens chaperonin containing TCP1, subunit 4 (delta) (CCT4), transcript variant 1, mRNA [NM_006430]	CCTCTGAATTTCTGGGCTTGGTCTTCCAGTTGGCATTTGCCTGAAGTTGTATTGAAACAA	10575	chaperonin containing TCP1, subunit 4 (delta)	NM_006430	15.8375	15.7073	16.0216	15.886	1.09442	1.09859
A_23_P102471	16	MSH2	Homo sapiens mutS homolog 2 (MSH2), transcript variant 1, mRNA [NM_000251]	AACCCTTTTTCCATAGTGTTAACTGTCAGTGCCCATGGGCTATCAACTTAATAAGATATT	4436	mutS homolog 2	NM_000251	11.0701	10.8166	11.5579	10.9509	1.19211	1.52313
A_23_P102508	16	SLC5A6	Homo sapiens solute carrier family 5 (sodium/multivitamin and iodide cotransporter), member 6 (SLC5A6), transcript variant 1, mRNA [NM_021095]	TTTTTCTCGTCGCTTGCCAATCTGTTTTTTAAAGGATCAGGCTCGTAGGGAGCAGGATCA	8884	solute carrier family 5 (sodium/multivitamin and iodide cotransporter), member 6	NM_021095	9.11239	9.48787	7.64928	8.48571	0.770851	0.560029
A_23_P102517	16	PDE6D	Homo sapiens phosphodiesterase 6D, cGMP-specific, rod, delta (PDE6D), transcript variant 1, mRNA [NM_002601]	TTTTGACGACGATCTTCTTGTAAGCACATCCAGAGTGAGACTTTTCTATGTTTGAAAGAA	5147	phosphodiesterase 6D, cGMP-specific, rod, delta	NM_002601	10.1445	9.77002	8.84389	9.13349	1.29637	0.818127
A_23_P102542	16	AFTPH	Homo sapiens aftiphilin (AFTPH), transcript variant 1, mRNA [NM_203437]	TAGATTGCTATGGTTTAGGCTGTATATACAGTGAAAACTATGGGTTTTAAATGTTTGGGG	54812	aftiphilin	NM_203437	11.3355	11.6099	11.6808	11.9337	0.826838	0.8392
A_23_P102571	16	SLC2A4RG	Homo sapiens SLC2A4 regulator (SLC2A4RG), mRNA [NM_020062]	CATGTTTGTTTTTGAAGCTCAGGTGTCTCACGTCTGGGCTGCACCAGGCGAAGAGAGAAA	56731	SLC2A4 regulator	NM_020062	11.9094	12.7467	11.1874	11.678	0.55968	0.71172
A_23_P102582	16	C20orf24	Homo sapiens chromosome 20 open reading frame 24 (C20orf24), transcript variant 1, mRNA [NM_018840]	TAAACTATCAATGGCATTTCAAGTCTTCTGAAACAGCATGGCTGTATGTGCGTGGTCCAT	55969	chromosome 20 open reading frame 24	NM_018840	12.5078	12.5209	12.8812	12.3536	0.990973	1.44151
A_23_P102634	1	WFDC6	Homo sapiens WAP four-disulfide core domain 6 (WFDC6), mRNA [NM_080827]	AATGTTTAGACTTCAGAAAGGTCAGCCTTACTTTATACCATAAGGAGGAGCTTGAATAAC	140870	WAP four-disulfide core domain 6	NM_080827	2.07627	6.8606	2.01801	2.19299	0.0362888	0.885781
A_23_P102706	2	SNPH	Homo sapiens syntaphilin (SNPH), mRNA [NM_014723]	TAGATTTCTCCCAAGGGGATCACTTAGCTTCTCACTGACACACCCTTCCCAATTGCCACA	9751	syntaphilin	NM_014723	2.27082	2.03402	3.88047	5.07724	1.17838	0.43625
A_23_P102731	2	SMOX	Homo sapiens spermine oxidase (SMOX), transcript variant 1, mRNA [NM_175839]	CTGCCTTGTTATTGTAAGTGCCTTCAATACTTTGCATTTTGGGATAATAAAAAAGGCTCC	54498	spermine oxidase	NM_175839	1.92114	1.88868	1.89883	1.88095	1.02276	1.01247
A_23_P102770	16	NAA20	Homo sapiens N(alpha)-acetyltransferase 20, NatB catalytic subunit (NAA20), transcript variant 1, mRNA [NM_016100]	CTCTAGATGCTTTATGGACAATATTATTTTCATTGGATGATTCTGGAGCTCTATTAGGAG	51126	N(alpha)-acetyltransferase 20, NatB catalytic subunit	NM_016100	10.8932	10.3384	11.2093	10.8031	1.46898	1.3252
A_23_P102832	16	CEP250	Homo sapiens centrosomal protein 250kDa (CEP250), mRNA [NM_007186]	TGTTCCCAGGAAGAGGAAGTAAATCTGCAACCCTGGGGAGGACCCCAACTCACCTGGGAA	11190	centrosomal protein 250kDa	NM_007186	9.75381	9.83124	9.44402	9.56884	0.947744	0.91712
A_23_P102842	16	NFS1	Homo sapiens NFS1 cysteine desulfurase (NFS1), transcript variant 1, mRNA [NM_021100]	TTTTCTGTAGCTCCAAAGGCTATCTCTTCATATTGACTGCAGACAGACTGAATGGACAGT	9054	NFS1 cysteine desulfurase	NM_021100	10.8398	10.8585	10.8949	11.0029	0.987108	0.927848
A_23_P102864	13	TMPRSS15	Homo sapiens transmembrane protease, serine 15 (TMPRSS15), mRNA [NM_002772]	TGCAGGCTATGAAGAAGGAGGAATAGATTCTTGTCAGGGGGATTCAGGAGGACCATTAAT	5651	transmembrane protease, serine 15	NM_002772	5.51542	4.39292	4.96912	10.2032	2.17724	0.0265695
A_23_P102876	16	CCT8	Homo sapiens chaperonin containing TCP1, subunit 8 (theta) (CCT8), transcript variant 1, mRNA [NM_006585]	GACTTGAACAGTATGCTATTAAGAAGTTTGCTGAGGCATTTGAAGCTATTCCCCGCGCAC	10694	chaperonin containing TCP1, subunit 8 (theta)	NM_006585	14.3218	14.2215	14.7902	14.8592	1.07201	0.953328
A_23_P102890	16	MRPS6	Homo sapiens mitochondrial ribosomal protein S6 (MRPS6), mRNA [NM_032476]	GTGAGCTAGTCATTCAGCCTGTGTAACCATGTGGAAATAAAAATTGACGACCAATGTATT	64968	mitochondrial ribosomal protein S6	NM_032476	13.027	12.3268	14.3657	14.1668	1.62475	1.14782
A_23_P1029	6	MFAP2	Homo sapiens microfibrillar-associated protein 2 (MFAP2), transcript variant 1, mRNA [NM_017459]	CCGCCTCTACTCCATACACAGGCCTTGCAAACAGTGTCTCAACGAGGTCTGCTTCTACAG	4237	microfibrillar-associated protein 2	NM_017459	1.80871	1.8124	4.33585	5.91437	0.997448	0.334824
A_23_P10291	8	CTSE	Homo sapiens cathepsin E (CTSE), transcript variant 1, mRNA [NM_001910]	TATTGGTAATGTTAAGACTGCTGGGTGGGTTTGGAGTTCTTGGCTTTAATCATTCATTAC	1510	cathepsin E	NM_001910	4.48322	4.31601	4.2083	2.06884	1.12289	4.40598
A_23_P102925	16	PWP2	Homo sapiens PWP2 periodic tryptophan protein homolog (yeast) (PWP2), mRNA [NM_005049]	TGACAGCCTGCATCTGCTTGGAGGAGGAGGCAGAGACTCAGAAGAAGAGATGCTGGCCTA	5822	PWP2 periodic tryptophan protein homolog (yeast)	NM_005049	9.80918	9.65725	10.2413	10.3884	1.11105	0.903051
A_23_P102937	16	SUMO3	Homo sapiens small ubiquitin-like modifier 3 (SUMO3), transcript variant 1, mRNA [NM_006936]	AAAGTAAGACTAAGTATTGCTGAATTTGCAGTTATGTTGTCGTGTATAAGAGCTACTTCC	6612	small ubiquitin-like modifier 3	NM_006936	10.6104	10.7006	10.4657	10.4541	0.939402	1.00803
A_23_P102950	16	RSPH1	Homo sapiens radial spoke head 1 homolog (Chlamydomonas) (RSPH1), transcript variant 1, mRNA [NM_080860]	GGGTTTTTAGTCTTTCTTTCTCAGCTGTATGTTAAGTTGGTTGACAAATGCAAATAAACG	89765	radial spoke head 1 homolog (Chlamydomonas)	NM_080860	10.4036	9.56428	10.5346	10.7945	1.78926	0.835188
A_23_P102965	16	BCL2L13	Homo sapiens BCL2-like 13 (apoptosis facilitator) (BCL2L13), transcript variant 1, mRNA [NM_015367]	TTCTATGGGTCTCTTGCTAGGGGGTAAGGATTTTTATTCTTGGGCTTATAGAGCCAGTTA	23786	BCL2-like 13 (apoptosis facilitator)	NM_015367	11.1567	11.2511	10.271	10.3021	0.936627	0.978683
A_23_P102988	12	TXNRD2	Homo sapiens thioredoxin reductase 2 (TXNRD2), transcript variant 1, mRNA [NM_006440]	AGACACCAGAAGTCTGAATTTGGAGAAGGCTGGGGTAGATACTAGCCCCGACACTCAGAA	10587	thioredoxin reductase 2	NM_006440	4.66534	4.01616	5.32735	5.79771	1.56829	0.721786
A_23_P103011	15	RAB36	Homo sapiens RAB36, member RAS oncogene family (RAB36), mRNA [NM_004914]	GTGGGTGTGGTGTCCAGCTGTTACCAGCTTCTGAGCTAGAGCTGTACTGCCTCACGTACA	9609	RAB36, member RAS oncogene family	NM_004914	7.21626	6.46959	5.01979	5.1368	1.67791	0.922095
A_23_P10305	16	CTPS2	Homo sapiens CTP synthase 2 (CTPS2), transcript variant 2, mRNA [NM_175859]	TCTTGGGCAAGGACAAAGAAGATTCCTTTTCTGGGAGTTTGTCTTGGGATGCAACTAGCA	56474	CTP synthase 2	NM_175859	8.74567	8.09869	8.08575	7.74263	1.56589	1.2685
A_23_P103070	16	YWHAH	Homo sapiens tyrosine 3-monooxygenase/tryptophan 5-monooxygenase activation protein, eta (YWHAH), mRNA [NM_003405]	AGCTGATAGTGTTTCGTTAAGCAGTACATCTTGTGCATGCAAAAATGAATTCACCCCTCC	7533	tyrosine 3-monooxygenase/tryptophan 5-monooxygenase activation protein, eta	NM_003405	9.8422	10.1974	10.7594	10.3718	0.781763	1.30817
A_23_P103099	15	RBFOX2	Homo sapiens RNA binding protein, fox-1 homolog (C. elegans) 2 (RBFOX2), transcript variant 1, mRNA [NM_001031695]	CCTAGATGTAGAAATAATCTTTAATGAACGTGGCTCTAAGGGATTCGGGTTCGTAACTTT	23543	RNA binding protein, fox-1 homolog (C. elegans) 2	NM_001031695	6.22367	5.24017	5.06443	5.28553	1.97725	0.857912
A_23_P103104	16	MFNG	Homo sapiens MFNG O-fucosylpeptide 3-beta-N-acetylglucosaminyltransferase (MFNG), transcript variant 1, mRNA [NM_002405]	CCAATTGTGATGATCCTTTTTGCTCATTTCCCAGCCTTTCTTGCTGTTAGGGGCTACCAT	4242	MFNG O-fucosylpeptide 3-beta-N-acetylglucosaminyltransferase	NM_002405	12.7517	12.2094	12.3139	11.9931	1.45621	1.24902
A_23_P103110	14	MAFF	Homo sapiens v-maf avian musculoaponeurotic fibrosarcoma oncogene homolog F (MAFF), transcript variant 1, mRNA [NM_012323]	CTCCCTGGGAAAAGTGGCGTATGGCCCTGAGCTGGGCTTTATATTTTATATCTGCAAATA	23764	v-maf avian musculoaponeurotic fibrosarcoma oncogene homolog F	NM_012323	4.5118	4.00352	8.99286	9.80253	1.42235	0.570513
A_23_P103131	16	MIEF1	Homo sapiens mitochondrial elongation factor 1 (MIEF1), mRNA [NM_019008]	CAAGGATTTCTTATGGTGGTTTCAGTTTCATTTGCATAAAGGTATTGAGAGGGAACAAAA	54471	mitochondrial elongation factor 1	NM_019008	12.7966	12.7585	13.3707	13.1082	1.02676	1.1996
A_23_P103149	16	ACO2	Homo sapiens aconitase 2, mitochondrial (ACO2), mRNA [NM_001098]	TTTGAGTTTGGTTCAGATCTTAAGCAGCTCCATGCAACTGTATTTATTTTTGATGACAAG	50	aconitase 2, mitochondrial	NM_001098	13.8314	13.6603	13.3724	13.519	1.12597	0.903376
A_23_P103201	16	PNRC2	Homo sapiens proline-rich nuclear receptor coactivator 2 (PNRC2), mRNA [NM_017761]	TAAAGTTTGCCCTTGTGCTAAAGTGCCAGTGTATGTATTGTTATACTTGATTTGGTTGTA	55629	proline-rich nuclear receptor coactivator 2	NM_017761	11.7765	11.6535	11.4826	11.5115	1.08898	0.980168
A_23_P103276	16	KTI12	Homo sapiens KTI12 homolog, chromatin associated (S. cerevisiae) (KTI12), mRNA [NM_138417]	GAATTGTTTTAAAACAATTGTGAACAGAAACTGAAGATGGTACAGTTCTACATCTGCACC	112970	KTI12 homolog, chromatin associated (S. cerevisiae)	NM_138417	8.25683	8.3622	8.64654	8.66063	0.929569	0.990278
A_23_P103282	16	TMEM59	Homo sapiens transmembrane protein 59 (TMEM59), mRNA [NM_004872]	TGAAGATCATGAAGAAGCAGGGCCTCTACCTACAAAAGTGAATCTTGCTCATTCTGAAAT	9528	transmembrane protein 59	NM_004872	12.4915	12.5317	13.0663	13.2485	0.972488	0.881357
A_23_P103310	3	S100A7	Homo sapiens S100 calcium binding protein A7 (S100A7), mRNA [NM_002963]	ACGATGATGAAGGAGAACTTCCCCAACTTCCTTAGTGCCTGTGACAAAAAGGGCACAAAT	6278	S100 calcium binding protein A7	NM_002963	3.23919	5.32138	3.56806	7.10311	0.236156	0.0862665
A_23_P103361	16	LCK	Homo sapiens LCK proto-oncogene, Src family tyrosine kinase (LCK), transcript variant 2, mRNA [NM_005356]	CCCACCCACATGTGACACATATGCACCTTGTGTCTGTACACGTGTCCTGTAGTTGCGTGG	3932	LCK proto-oncogene, Src family tyrosine kinase	NM_005356	11.7801	12.0533	9.51075	8.98972	0.827476	1.43498
A_23_P103371	3	AZIN2	Homo sapiens antizyme inhibitor 2 (AZIN2), transcript variant 1, mRNA [NM_052998]	CCATCGTGTACCACCTTGATGAGGGCGTGTATGGGATCTTCAACTCAGTCCTGTTTGACA	113451	antizyme inhibitor 2	NM_052998	1.85762	1.85155	2.97883	3.40819	1.00422	0.742591
A_23_P103398	13	PSEN2	Homo sapiens presenilin 2 (PSEN2), transcript variant 1, mRNA [NM_000447]	GGAGTGTTCCCAATGCTTTGTCCATGATGTCCTTGTTATTTTATTGCCTTTAGAAACTGA	5664	presenilin 2	NM_000447	1.97759	1.84914	10.5043	10.5456	1.09312	0.971743
A_23_P103414	16	YTHDF2	Homo sapiens YTH N(6)-methyladenosine RNA binding protein 2 (YTHDF2), transcript variant 1, mRNA [NM_016258]	CAAGGTTGTGTCTTTAAGGGTGGTTCATTTTCTCTGACCTTTTGTTACTCAAAGTAAAGT	51441	YTH N(6)-methyladenosine RNA binding protein 2	NM_016258	12.3775	12.2936	12.8844	12.7838	1.05988	1.07223
A_23_P103433	16	OSCP1	Homo sapiens organic solute carrier partner 1 (OSCP1), transcript variant 1, mRNA [NM_145047]	CCCATGGCCCAGAATGATGCTGCTAGTTTTCTACTGAGTGAAGCCATTACGTCTATTTCT	127700	organic solute carrier partner 1	NM_145047	9.18696	7.94538	8.7271	8.18457	2.36458	1.45653
A_23_P103442	16	MEAF6	Homo sapiens MYST/Esa1-associated factor 6 (MEAF6), transcript variant 1, mRNA [NM_022756]	TAAGTAAAATGGGAAACTTGCCTCTGTTTTTTGCAAGGGGAGGTAAAGAGTGTTTAGTAA	64769	MYST/Esa1-associated factor 6	NM_022756	11.4183	11.8461	11.8422	11.957	0.743378	0.923566
A_23_P103465	2	PLA2G5	Homo sapiens phospholipase A2, group V (PLA2G5), mRNA [NM_000929]	CCTCTGGTGCCAAGAGCTCTCCTCCAACTCAGGGTTGGCTGTGTCTCTTTTCTTCTCTGA	5322	phospholipase A2, group V	NM_000929	3.09312	4.45608	3.15659	3.43265	0.388784	0.825843
A_23_P103476	16	UBIAD1	Homo sapiens UbiA prenyltransferase domain containing 1 (UBIAD1), mRNA [NM_013319]	TTAAAGTCAGAGTCTCTGAGGAAGGAATGTGATTTGGCAGTCAGGGTACTAAGCATGGGT	29914	UbiA prenyltransferase domain containing 1	NM_013319	9.60271	9.39725	9.99989	10.3777	1.15305	0.769622
A_23_P103486	1	CYP2J2	Homo sapiens cytochrome P450, family 2, subfamily J, polypeptide 2 (CYP2J2), mRNA [NM_000775]	CACGTGTTCTGAAACCACTGGTGTCTGCTCAGATGTGTTGGGACAAAATGAAAGTGACTT	1573	cytochrome P450, family 2, subfamily J, polypeptide 2	NM_000775	1.90875	1.91426	1.87112	1.89576	0.996191	0.98307
A_23_P103503	16	MDM4	Homo sapiens MDM4, p53 regulator (MDM4), transcript variant 1, mRNA [NM_002393]	ATTGCCAGAATCTCTTGAAGCCATGTAGCTTATGTGAGAAAAGACCACGAGACGGGAACA	4194	MDM4, p53 regulator	NM_002393	10.6929	11.138	10.5532	11.1109	0.734564	0.679384
A_23_P103511	11	C1orf226	Homo sapiens chromosome 1 open reading frame 226 (C1orf226), transcript variant 2, mRNA [NM_001085375]	GTTCTGAGGAGGAGGAGGAAGATTACAGATCTATTCTGAGTATTTTTTAGAGAGTTAATA	400793	chromosome 1 open reading frame 226	NM_001085375	2.65869	3.68879	4.39346	3.9671	0.489678	1.34384
A_23_P103532	16	GPR161	Homo sapiens G protein-coupled receptor 161 (GPR161), transcript variant 1, mRNA [NM_001267609]	CTGCCACCCCCTGATCTATGGACTCTGGAACAAGACAGTTCGCAAAGAACTACTGGGCAT	23432	G protein-coupled receptor 161	NM_001267609	6.15593	6.37093	6.1823	6.31117	0.861546	0.914547
A_23_P103601	13	MAN1C1	Homo sapiens mannosidase, alpha, class 1C, member 1 (MAN1C1), transcript variant 1, mRNA [NM_020379]	GGGGTTTCCCTTTGGGCCTCAGTGTTACAAATTACTAGTGCTATTTTCATTATTATTGTA	57134	mannosidase, alpha, class 1C, member 1	NM_020379	4.70702	4.40825	7.7591	8.62982	1.2301	0.546873
A_23_P103617	13	ANXA9	Homo sapiens annexin A9 (ANXA9), mRNA [NM_003568]	TTCTTTAAAATCCCTTAATTTTCCCATCTCAAAATTATATCTGTACCTGGGTCATCCAGC	8416	annexin A9	NM_003568	4.63498	5.05288	8.88991	9.82491	0.748511	0.523042
A_23_P103628	16	HEATR1	Homo sapiens HEAT repeat containing 1 (HEATR1), mRNA [NM_018072]	CCTCGCCTAAGGTTCGATTTGCTGCTTTGATTACTGTGTTAGCACTGGCTGAAAAACTAA	55127	HEAT repeat containing 1	NM_018072	10.078	10.0031	11.3523	11.2323	1.05329	1.08678
A_23_P103631	16	EBNA1BP2	Homo sapiens EBNA1 binding protein 2 (EBNA1BP2), transcript variant 2, mRNA [NM_006824]	AAGACTCGCAATTTCACGACACACTTTGATCCCTTCTGTTGGTGTCATGTTGTAAACATT	10969	EBNA1 binding protein 2	NM_006824	13.03	12.3713	13.3074	12.572	1.57876	1.66481
A_23_P103661	16	YY1AP1	Homo sapiens YY1 associated protein 1 (YY1AP1), transcript variant 2, mRNA [NM_139118]	GAAGATGCTACAGAGGAAATCAGTGGATTTCTTTGAGCTAGGAGAATAAGAGTCTGGAGA	55249	YY1 associated protein 1	NM_139118	11.4653	11.9051	11.9208	12.1602	0.737252	0.847061
A_23_P103672	8	NES	Homo sapiens nestin (NES), mRNA [NM_006617]	GCAAAGGGAATCTCTTGCCTGCTCCATCTCATAGGCTAAGTCAGCTGAATCCCGATAGTA	10763	nestin	NM_006617	4.2792	4.64323	4.63901	4.18827	0.776993	1.36675
A_23_P103690	16	FAM189B	Homo sapiens family with sequence similarity 189, member B (FAM189B), transcript variant 1, mRNA [NM_006589]	ATGCCCCTTCTTATAGCACTGGAGGAGGAAAACAAATTCTTGTCCCCCTCAGAATGAGAG	10712	family with sequence similarity 189, member B	NM_006589	10.47	10.6038	10.4719	10.897	0.911383	0.744789
A_23_P103720	4	AGMAT	Homo sapiens agmatine ureohydrolase (agmatinase) (AGMAT), mRNA [NM_024758]	AACCGTCTGAGTCTTGTGCTCTTCAAGACAAAACAGATTGCGTCGCTGACAAGTTCTCAA	79814	agmatine ureohydrolase (agmatinase)	NM_024758	4.94744	6.68456	1.86836	1.91434	0.299968	0.968633
A_23_P10374	16	R3HDM2	Homo sapiens R3H domain containing 2 (R3HDM2), mRNA [NM_014925]	TGTTTGTTTGAGGTTCGTGCCGCAGTAACAGACACAGTATTTAATTGCACATACAGATGT	22864	R3H domain containing 2	NM_014925	11.9748	12.0429	9.08441	9.53172	0.953916	0.733409
A_23_P103756	16	OVGP1	Homo sapiens oviductal glycoprotein 1, 120kDa (OVGP1), mRNA [NM_002557]	TCTGAGGTGGGCACTCACCCCAGGATGGGTAACTTGGGTCTTCAGATGGAAGCTGAAAAC	5016	oviductal glycoprotein 1, 120kDa	NM_002557	7.39871	8.85814	8.36363	8.07767	0.363636	1.21922
A_23_P103775	11	LRRC8C	Homo sapiens leucine rich repeat containing 8 family, member C (LRRC8C), mRNA [NM_032270]	AAACTCTGAAGATTGGAAAAAACAGCCTATCTGTACTTTCACCGAAAATTGGAAATTTGC	84230	leucine rich repeat containing 8 family, member C	NM_032270	7.19114	7.53528	4.21634	3.72945	0.78778	1.40142
A_23_P103803	15	FCRL3	Homo sapiens Fc receptor-like 3 (FCRL3), mRNA [NM_052939]	AAGAGCATGAGGAACTTACAGTCCTCTATTCAGAACTGAAGAAGACACACCCAGACGACT	115352	Fc receptor-like 3	NM_052939	6.5756	7.14658	5.87189	5.93486	0.673157	0.95729
A_23_P103812	12	BRINP3	Homo sapiens bone morphogenetic protein/retinoic acid inducible neural-specific 3 (BRINP3), mRNA [NM_199051]	GTCAGCGTCGTCTAGATCTTTTCTCTTGCTTGCTTCGTCATAGACTCAAGCTGTCTACTA	339479	bone morphogenetic protein/retinoic acid inducible neural-specific 3	NM_199051	1.75954	1.74189	8.27228	9.20607	1.01231	0.523479
A_23_P103837	16	UBAP2L	Homo sapiens ubiquitin associated protein 2-like (UBAP2L), transcript variant 3, mRNA [NM_001287815]	TGGATATGGGTCTCATGGATACAACACTGGAAGAAAATATCCACCCCCTTACAAGCATTT	9898	ubiquitin associated protein 2-like	NM_001287815	9.23741	9.26813	9.18121	9.05356	0.978927	1.09251
A_23_P10385	16	DTL	Homo sapiens denticleless E3 ubiquitin protein ligase homolog (Drosophila) (DTL), transcript variant 1, mRNA [NM_016448]	GGAAGATGTTATTTATGACCAATATCTGCCAGTAACGCTGTTTATCTCACTTGCTTTGAA	51514	denticleless E3 ubiquitin protein ligase homolog (Drosophila)	NM_016448	8.62421	8.95473	9.81777	8.56389	0.795248	2.38482
A_23_P103864	16	TTC13	Homo sapiens tetratricopeptide repeat domain 13 (TTC13), transcript variant 1, mRNA [NM_024525]	AGGAGTGTTTGTATTCCTTTAGAGATCTGGATATTTTTCAAAGACTTGCTTTTTACGCAC	79573	tetratricopeptide repeat domain 13	NM_024525	8.00076	8.23667	7.91045	7.57015	0.84915	1.26602
A_23_P103877	4	LRRC38	Homo sapiens leucine rich repeat containing 38 (LRRC38), mRNA [NM_001010847]	ATATAATAGGCCTCAGCAACCTTGGGATGTTATACTGGGAACTAATAAACTCGTGTGCAA	126755	leucine rich repeat containing 38	NM_001010847	2.55337	2.59232	3.54827	3.18276	0.973366	1.28834
A_23_P103905	16	UFC1	Homo sapiens ubiquitin-fold modifier conjugating enzyme 1 (UFC1), mRNA [NM_016406]	TGGATGGAAAGACAGCAAAGATGTACAGGGGTGGCAAAATATGCCTGACGGATCATTTCA	51506	ubiquitin-fold modifier conjugating enzyme 1	NM_016406	11.641	11.688	10.6814	10.9757	0.96792	0.81547
A_23_P103919	16	B4GALT3	Homo sapiens UDP-Gal:betaGlcNAc beta 1,4- galactosyltransferase, polypeptide 3 (B4GALT3), transcript variant 2, mRNA [NM_003779]	TGTAGGGCTTATGACTGTGAATCCTTGATGTCATGATTTTATGTGACGATTCCTAGGAGT	8703	UDP-Gal:betaGlcNAc beta 1,4- galactosyltransferase, polypeptide 3	NM_003779	11.4306	11.3801	13.4972	13.9936	1.03562	0.708874
A_23_P103932	16	FGR	Homo sapiens FGR proto-oncogene, Src family tyrosine kinase (FGR), transcript variant 2, mRNA [NM_001042747]	TTGCAGAGCACTTCCCACCTCTCTGAATAGTGTGTATGTGTTGGTTTATTGATTCTGTAA	2268	FGR proto-oncogene, Src family tyrosine kinase	NM_001042747	8.47507	8.76112	10.0409	11.3733	0.820142	0.397111
A_23_P103942	16	DNAJC11	Homo sapiens DnaJ (Hsp40) homolog, subfamily C, member 11 (DNAJC11), mRNA [NM_018198]	CTGTAACATTCATCTCCATTTTTTAAAAAAGGTTTCTCTGACGGCCCCACGGCCCGAGCC	55735	DnaJ (Hsp40) homolog, subfamily C, member 11	NM_018198	8.97047	8.50945	10.3643	9.72537	1.37651	1.55719
A_23_P103968	16	AKR7A3	Homo sapiens aldo-keto reductase family 7, member A3 (aflatoxin aldehyde reductase) (AKR7A3), mRNA [NM_012067]	ACAGCCTGTGGGCCGCTTCTTTGGGAATACCTGGGCAGAGATGTACAGGAATCGCTACTG	22977	aldo-keto reductase family 7, member A3 (aflatoxin aldehyde reductase)	NM_012067	11.0628	10.8681	10.236	10.2865	1.14452	0.965569
A_23_P104025	16	TSEN15	Homo sapiens TSEN15 tRNA splicing endonuclease subunit (TSEN15), transcript variant 1, mRNA [NM_052965]	TTTTAGGTTTTTAAACCTACTGTCTCTGTCATAACTTGTCAACACTGCTGTATGAAGCAC	116461	TSEN15 tRNA splicing endonuclease subunit	NM_052965	8.30296	7.96958	7.94687	7.43157	1.25996	1.42928
A_23_P104046	16	BPNT1	Homo sapiens 3'(2'), 5'-bisphosphate nucleotidase 1 (BPNT1), transcript variant 1, mRNA [NM_006085]	GCCTCTGCTTATGTATTTGCAAGTCCTGGTTGTAAGAAGTGGGATACTTGTGCTCCAGAA	10380	3'(2'), 5'-bisphosphate nucleotidase 1	NM_006085	12.675	12.1658	11.2694	11.0935	1.42331	1.12971
A_23_P104054	16	SUCO	Homo sapiens SUN domain containing ossification factor (SUCO), transcript variant 2, mRNA [NM_016227]	TAAATTTCTTTCCTGTCTGCACAATTAGCTATTCAGAGCAAGAGGGCCTGATTTTATAGA	51430	SUN domain containing ossification factor	NM_016227	10.7372	10.5359	10.9946	10.9068	1.14968	1.06279
A_23_P104073	7	S100A3	Homo sapiens S100 calcium binding protein A3 (S100A3), mRNA [NM_002960]	GGTCTTCTGCGATCAGTTAACCCATTTTACCTAGGAGGCCCAGAGATGTGAGGGCTCCTT	6274	S100 calcium binding protein A3	NM_002960	3.90931	1.70682	4.78454	2.75638	4.60274	4.07884
A_23_P104098	8	SYT2	Homo sapiens synaptotagmin II (SYT2), transcript variant 1, mRNA [NM_177402]	GCAAGAACAAGTAGACAGCAGCGGCTGGGACCCCACACCTTTCACGGACACTGACAAGAT	127833	synaptotagmin II	NM_177402	4.4619	2.90719	4.28807	2.16081	2.93773	4.36886
A_23_P104109	16	RPS6KC1	Homo sapiens ribosomal protein S6 kinase, 52kDa, polypeptide 1 (RPS6KC1), transcript variant 1, mRNA [NM_012424]	CATTTGGTGTTGCAGATGAGTTGTAAAGCCAACTGAAAGAGTTCCTTCAAGAAGTTCCTC	26750	ribosomal protein S6 kinase, 52kDa, polypeptide 1	NM_012424	5.88472	5.89539	7.23984	6.84064	0.992629	1.31878
A_23_P104116	16	RBM8A	Homo sapiens RNA binding motif protein 8A (RBM8A), mRNA [NM_005105]	ATTCCATTTGACCATGCAGCCTTGGACAAATAGGACTGGGGTGGAACTTGCTGTGTTTAT	9939	RNA binding motif protein 8A	NM_005105	14.2573	14.085	14.5073	14.4897	1.12681	1.01226
A_23_P104146	16	ZMYM4	Homo sapiens zinc finger, MYM-type 4 (ZMYM4), mRNA [NM_005095]	TTGGATTGTCTGATAAGTCTGCCAATAAACTATCCAGAAATAGCAAGTGTAATAGTCCCC	9202	zinc finger, MYM-type 4	NM_005095	9.65088	9.55557	9.7556	9.09378	1.06829	1.58208
A_23_P104151	16	TMEM69	Homo sapiens transmembrane protein 69 (TMEM69), mRNA [NM_016486]	TTACCACATTATCCCAACTGGTTTAAAGCCCTGAGGATAGTAGTCACTTTATTGGCCACT	51249	transmembrane protein 69	NM_016486	10.7246	10.35	10.5777	10.5871	1.29645	0.993525
A_23_P104188	6	ELF3	Homo sapiens E74-like factor 3 (ets domain transcription factor, epithelial-specific ) (ELF3), transcript variant 1, mRNA [NM_004433]	AGGTTCTCCAGAGTCGGAACTGAGGGTTGGAACTATACCCGGGACCAAACTCACGGACCA	1999	E74-like factor 3 (ets domain transcription factor, epithelial-specific )	NM_004433	1.70544	1.70297	3.87284	4.24435	1.00171	0.772971
A_23_P104199	16	ITGB1	Homo sapiens integrin, beta 1 (fibronectin receptor, beta polypeptide, antigen CD29 includes MDF2, MSK12) (ITGB1), transcript variant 1E, mRNA [NM_133376]	TGCAACCCCAACTACACTGGCAGTGCATGTGACTGTTCTTTGGATACTAGTACTTGTGAA	3688	integrin, beta 1 (fibronectin receptor, beta polypeptide, antigen CD29 includes MDF2, MSK12)	NM_133376	10.3918	10.4471	8.44125	9.11196	0.962414	0.628197
A_23_P104201	16	YME1L1	Homo sapiens YME1-like 1 ATPase (YME1L1), transcript variant 1, mRNA [NM_139312]	TGGTGTAATTGAAGGGTGTGAAATGCTTTGTCAATCATTTGTCACATTTATCCAGTTTGG	10730	YME1-like 1 ATPase	NM_139312	12.0189	12.0729	11.9251	12.0629	0.963319	0.90889
A_23_P104318	16	DDIT4	Homo sapiens DNA-damage-inducible transcript 4 (DDIT4), mRNA [NM_019058]	TCGTGGAGGTGGTTTGTGTATCTTACTGGTCTGAAGGGACCAAGTGTGTTTGTTGTTTGT	54541	DNA-damage-inducible transcript 4	NM_019058	11.4602	11.0294	11.9351	11.6479	1.34801	1.22023
A_23_P104323	15	MGMT	Homo sapiens O-6-methylguanine-DNA methyltransferase (MGMT), mRNA [NM_002412]	TCTTCACCATCCCGTTTTCCAGCAAGAGTCGTTCACCAGACAGGTGTTATGGAAGCTGCT	4255	O-6-methylguanine-DNA methyltransferase	NM_002412	10.9665	11.2186	9.45148	9.26212	0.83964	1.14025
A_23_P104362	16	ECHS1	Homo sapiens enoyl CoA hydratase, short chain, 1, mitochondrial (ECHS1), mRNA [NM_004092]	TTTTAGAAGCAAGTAAATCATCCTCTTTTCAAGAGCAGTGTCCGTGGTGTGCAGTTCCTC	1892	enoyl CoA hydratase, short chain, 1, mitochondrial	NM_004092	12.0931	12.0328	12.2424	12.0521	1.04266	1.14101
A_23_P104372	16	DNAJC9	Homo sapiens DnaJ (Hsp40) homolog, subfamily C, member 9 (DNAJC9), mRNA [NM_015190]	CCAGTTTACATTTGGTCTTAATGATCTTGAATAGATCCTCTCTTCATTTTACTCAGCCAG	23234	DnaJ (Hsp40) homolog, subfamily C, member 9	NM_015190	10.3266	10.559	11.8086	11.1391	0.851254	1.59055
A_23_P104413	16	DUX4	Homo sapiens double homeobox 4 (DUX4), mRNA [NM_001293798]	CCGGGGCAGCTCCACCTCCCCAGCCCGCGCCCCCGGGACGCCTCCGCCTCCGCGCGGCAG	100288687	double homeobox 4	NM_001293798	15.5988	15.6409	15.2645	15.4559	0.971272	0.875759
A_23_P104464	12	ALOX5	Homo sapiens arachidonate 5-lipoxygenase (ALOX5), transcript variant 1, mRNA [NM_000698]	GATGTCTATTCTTGTTGGAGACATGGGATGATTATTTTCTGTTCTATTTGTGCTTAGTCC	240	arachidonate 5-lipoxygenase	NM_000698	15.3536	15.3746	6.08467	4.68229	0.985521	2.64338
A_23_P104509	16	FAM53B	Homo sapiens family with sequence similarity 53, member B (FAM53B), mRNA [NM_014661]	CTCACATGAGCAGTTTTCCTTTGTGGAATACTGTCCTCCCTCAGCCAACAGCACACCTGC	9679	family with sequence similarity 53, member B	NM_014661	6.67913	6.69107	6.62759	6.26222	0.991759	1.28821
A_23_P104563	4	CPT1A	Homo sapiens carnitine palmitoyltransferase 1A (liver) (CPT1A), transcript variant 2, mRNA [NM_001031847]	ATGACGGCTATGGTGTGTCGTACATCCTTGTGGGAGAGAACCTCATCAATTTCCACATTT	1374	carnitine palmitoyltransferase 1A (liver)	NM_001031847	6.23415	7.20943	1.83404	2.0192	0.508643	0.879552
A_23_P104583	16	CORO1B	Homo sapiens coronin, actin binding protein, 1B (CORO1B), transcript variant 1, mRNA [NM_020441]	ACACCAGTGTGGTCTACGTCTGCGGCAAGGGTGACTCCAGCATCCGGTACTTTGAGATCA	57175	coronin, actin binding protein, 1B	NM_020441	7.49737	7.52204	7.91162	7.39006	0.983043	1.43551
A_23_P104594	3	SCT	Homo sapiens secretin (SCT), mRNA [NM_021920]	AGCATGGCCTGGACCAGGCTCAGCGCGGGTCTGCTCTGCCCGTCAGGGTCCAACATGCCC	6343	secretin	NM_021920	3.24853	3.03039	3.37735	3.27276	1.16324	1.07519
A_23_P104607	16	PSMC3	Homo sapiens proteasome (prosome, macropain) 26S subunit, ATPase, 3 (PSMC3), mRNA [NM_002804]	ACAAGGAGAAGTTTGAGAACTTGGGGATCCAACCTCCAAAAGGGGTGCTGATGTATGGGC	5702	proteasome (prosome, macropain) 26S subunit, ATPase, 3	NM_002804	9.32959	9.21158	10.2321	10.1591	1.08524	1.05189
A_23_P104617	16	GYLTL1B	Homo sapiens glycosyltransferase-like 1B (GYLTL1B), transcript variant 1, mRNA [NM_152312]	ATTGGGCAGACACCAGGGCAACCTGCCCTCCGCCATCCCTGCTATTTAAATTATTTAAGG	120071	glycosyltransferase-like 1B	NM_152312	7.77597	7.67832	7.95249	8.3027	1.07003	0.784468
A_23_P10463	16	NDUFS5	Homo sapiens NADH dehydrogenase (ubiquinone) Fe-S protein 5, 15kDa (NADH-coenzyme Q reductase) (NDUFS5), transcript variant 1, mRNA [NM_004552]	TGATGTCTGGAGGCTGATTTTCCTGTTCTCTGTTCTCCACTGGAAAGGTTGTTTACGACA	4725	NADH dehydrogenase (ubiquinone) Fe-S protein 5, 15kDa (NADH-coenzyme Q reductase)	NM_004552	14.8533	14.2714	15.4559	15.2529	1.49685	1.15108
A_23_P104641	16	VPS51	Homo sapiens vacuolar protein sorting 51 homolog (S. cerevisiae) (VPS51), transcript variant 1, mRNA [NM_013265]	ACTGCCACTTTCTGCAGCTCTACCTGTGGCGTTTTGTGGCCGACGAAGAACTCGTGCACT	738	vacuolar protein sorting 51 homolog (S. cerevisiae)	NM_013265	12.0829	11.9272	12.4612	12.5019	1.11397	0.972168
A_23_P104651	16	CDCA5	Homo sapiens cell division cycle associated 5 (CDCA5), mRNA [NM_080668]	TCACCAGATGATGCAGAGTTGAGATCATCATTGCAAAGTTCTCTGTTCCTGAGGAACTAA	113130	cell division cycle associated 5	NM_080668	11.1737	11.8736	12.3444	11.3023	0.615616	2.05926
A_23_P104689	16	RELA	Homo sapiens v-rel avian reticuloendotheliosis viral oncogene homolog A (RELA), transcript variant 1, mRNA [NM_021975]	TTATTCTTTTATTGTCAGTATCTGTATCTCTCTCTCTTTTTGGAGGTGCTTAAGCAGAAG	5970	v-rel avian reticuloendotheliosis viral oncogene homolog A	NM_021975	10.205	10.5326	10.9509	11.4606	0.796853	0.702385
A_23_P104692	16	PELI3	Homo sapiens pellino E3 ubiquitin protein ligase family member 3 (PELI3), transcript variant 1, mRNA [NM_145065]	CAAAGGGAGGAGAGAGGACTCACTGGTCAAGAGTGTCGGCTGTGACACAAGGGCCATCAT	246330	pellino E3 ubiquitin protein ligase family member 3	NM_145065	8.57618	8.90719	8.27945	8.45492	0.79498	0.885483
A_23_P104705	11	SLC29A2	Homo sapiens solute carrier family 29 (equilibrative nucleoside transporter), member 2 (SLC29A2), transcript variant 2, mRNA [NM_001532]	CACAGGATGCCTACTTCATCACCTTCATGCTGCTCTTTGCCGTTTCTAATGGCTACCTGG	3177	solute carrier family 29 (equilibrative nucleoside transporter), member 2	NM_001532	3.48975	4.44019	4.90079	5.60076	0.517473	0.615586
A_23_P104734	16	STT3A	Homo sapiens STT3A, subunit of the oligosaccharyltransferase complex (catalytic) (STT3A), transcript variant 2, mRNA [NM_152713]	ATTGGCTGGTCAGGATATACAAGGTAAAGGACCTGGATAATCGAGGCTTGTCAAGGACAT	3703	STT3A, subunit of the oligosaccharyltransferase complex (catalytic)	NM_152713	9.29384	9.60521	8.54724	9.06884	0.805879	0.6966
A_23_P104798	12	IL18	Homo sapiens interleukin 18 (IL18), transcript variant 1, mRNA [NM_001562]	TTGAATGACCAAGTTCTCTTCATTGACCAAGGAAATCGGCCTCTATTTGAAGATATGACT	3606	interleukin 18	NM_001562	4.44475	2.03163	10.5874	11.3277	5.32626	0.598609
A_23_P104804	16	ZBTB16	Homo sapiens zinc finger and BTB domain containing 16 (ZBTB16), transcript variant 1, mRNA [NM_006006]	GCATCCACACGGGTGAGAAACCCTACGAGTGCAATGGCTGTGGCAAGAAGTTCAGCCTCA	7704	zinc finger and BTB domain containing 16	NM_006006	5.65209	5.67069	5.38618	5.30182	0.98719	1.06022
A_23_P104876	14	SPA17	Homo sapiens sperm autoantigenic protein 17 (SPA17), mRNA [NM_017425]	TCTCAGATATCTGGGAAGGAGGAAGAGACATCAGTCACCATCTTAGACTCTTCTGAGGAA	53340	sperm autoantigenic protein 17	NM_017425	8.50052	7.72769	6.53019	4.17358	1.70862	5.12164
A_23_P104892	16	EIF4G2	Homo sapiens eukaryotic translation initiation factor 4 gamma, 2 (EIF4G2), transcript variant 1, mRNA [NM_001418]	AAGCAGAGGCAGTCTATTGCAAGGGACCTTCTTTGCTGCCAGTTATCATAGGCTGTTTTA	1982	eukaryotic translation initiation factor 4 gamma, 2	NM_001418	13.1486	13.2924	12.6624	13.4798	0.905145	0.567427
A_23_P104942	16	TMX2	Homo sapiens thioredoxin-related transmembrane protein 2 (TMX2), transcript variant 1, mRNA [NM_015959]	AGACAATATTGAACAACCCCCTATTTTGTGGGGATTGAGAAGGGGTGAATAGAGGCTTGA	51075	thioredoxin-related transmembrane protein 2	NM_015959	10.8984	10.9771	11.6033	11.488	0.946921	1.08323
A_23_P10497	16	ATP9B	Homo sapiens ATPase, class II, type 9B (ATP9B), mRNA [NM_198531]	CCATATTGAAGCAGCTTGAGTTTCTACTGAAAATGAGCCCGAATTATTTCACTATTACTG	374868	ATPase, class II, type 9B	NM_198531	9.02305	8.929	9.53936	9.19446	1.06736	1.27007
A_23_P104996	2	BEST1	Homo sapiens bestrophin 1 (BEST1), transcript variant 1, mRNA [NM_004183]	TCAAAGAACCTTTGGAACAATCACCAACCAACATACACACTACACTCAAAGATCACATGG	7439	bestrophin 1	NM_004183	3.47658	3.10247	3.25961	3.74728	1.29604	0.713174
A_23_P105002	16	ROM1	Homo sapiens retinal outer segment membrane protein 1 (ROM1), mRNA [NM_000327]	AGCAAAGAACAGAGTGATGGGAAAGTGACATGAGAAGGCCTGGAGGCTGATTCTGATATA	6094	retinal outer segment membrane protein 1	NM_000327	7.14961	7.24807	8.73189	8.96174	0.934029	0.852722
A_23_P105012	1	HRASLS2	Homo sapiens HRAS-like suppressor 2 (HRASLS2), mRNA [NM_017878]	GCCAGCAGGAGTGGAGTTTGGTTTACTGATTTTACTGTTTTGTGTTCATGAATCTTTATT	54979	HRAS-like suppressor 2	NM_017878	1.96212	4.22045	1.93991	1.94856	0.209012	0.994019
A_23_P105028	15	ATL3	Homo sapiens atlastin GTPase 3 (ATL3), transcript variant 1, mRNA [NM_015459]	AGCTCAATAGCATCTTAACGTGAAGATCAAACAAGAACACAACAAGCCCCTACTGATTTC	25923	atlastin GTPase 3	NM_015459	6.1609	7.02611	7.13835	7.728	0.548966	0.664505
A_23_P105044	16	MRPL23	Homo sapiens mitochondrial ribosomal protein L23 (MRPL23), mRNA [NM_021134]	AGAGAAGAGATCACAGAAACGTGAGGATCAAGAAGCCGGACTACAAGGTCGCCTACGTGC	6150	mitochondrial ribosomal protein L23	NM_021134	11.1543	10.6544	9.92868	10.3161	1.4141	0.764494
A_23_P10506	11	HPGDS	Homo sapiens hematopoietic prostaglandin D synthase (HPGDS), mRNA [NM_014485]	GGGAGATTTGCAGTACCACACTTTTGGTCTTTAAGCCTGACCTGTTAGACAACCATCCAA	27306	hematopoietic prostaglandin D synthase	NM_014485	3.99635	1.78438	2.73633	7.09542	4.63306	0.0487286
A_23_P105066	16	ILK	Homo sapiens integrin-linked kinase (ILK), transcript variant 3, mRNA [NM_001014795]	CTCATGTGTGTAAGCTCATGAAGATCTGCATGAATGAAGACCCTGCAAAGCGACCCAAAT	3611	integrin-linked kinase	NM_001014795	10.5255	10.4558	10.0543	10.8283	1.04951	0.584783
A_23_P105118	1	OR51G1	Homo sapiens olfactory receptor, family 51, subfamily G, member 1 (gene/pseudogene) (OR51G1), mRNA [NM_001005237]	CTGTTTCACTCAGCTCTTCTTCATCCACACCTTGTCTTCAATGGAGTCATCAGTTCTGTT	79324	olfactory receptor, family 51, subfamily G, member 1 (gene/pseudogene)	NM_001005237	1.94721	1.94814	1.89885	1.93256	0.999355	0.976902
A_23_P105138	16	CAT	Homo sapiens catalase (CAT), mRNA [NM_001752]	CTCATCACTGGATGAAGATTCTCCTGTGCTAGATGTGCAAATGCAAGCTAGTGGCTTCAA	847	catalase	NM_001752	10.4271	10.497	10.0229	10.7524	0.952685	0.603133
A_23_P10518	12	TFDP3	Homo sapiens transcription factor Dp family, member 3 (TFDP3), mRNA [NM_016521]	CAACTCGGCTCAGAACTGTCAGAACTTACGGGTGGAAAGACAGAAGAGACTTGAAAGAAT	51270	transcription factor Dp family, member 3	NM_016521	6.11514	5.59816	4.72735	3.05947	1.43096	3.17747
A_23_P105251	16	GLI1	Homo sapiens GLI family zinc finger 1 (GLI1), transcript variant 1, mRNA [NM_005269]	ATGTATAGTCTGTATACGTTTTGAGGAGAAATTTGATAATGACACTGTTTCCTGATAATA	2735	GLI family zinc finger 1	NM_005269	9.02944	8.9689	8.36757	7.19478	1.04286	2.25446
A_23_P105276	16	ZNF84	Homo sapiens zinc finger protein 84 (ZNF84), transcript variant 1, mRNA [NM_003428]	CACAGCAAAGAAGAATCCTGTGAATGTCCAAAAGCCTTCCAGAAGTCAAGTCTCTTAAGC	7637	zinc finger protein 84	NM_003428	7.75655	8.26703	9.60999	9.60858	0.701986	1.00098
A_23_P105307	16	DGKA	Homo sapiens diacylglycerol kinase, alpha 80kDa (DGKA), transcript variant 1, mRNA [NM_201444]	GGCTGGAGGGTGCAATTGAGATGGGCCAAATCTATACCAAGCTCAAGAATGCTGGACGTC	1606	diacylglycerol kinase, alpha 80kDa	NM_201444	9.06046	9.81115	8.56001	8.62273	0.594319	0.957459
A_23_P105313	16	EIF2B1	Homo sapiens eukaryotic translation initiation factor 2B, subunit 1 alpha, 26kDa (EIF2B1), mRNA [NM_001414]	ACATTCCTCAGCAGGATCAAGCCAAACAGTAAAAACTACCAAGAGAACACGAGGAAGGCA	1967	eukaryotic translation initiation factor 2B, subunit 1 alpha, 26kDa	NM_001414	12.0317	12.2957	12.1037	11.8692	0.83275	1.17654
A_23_P105392	16	CCT2	Homo sapiens chaperonin containing TCP1, subunit 2 (beta) (CCT2), transcript variant 1, mRNA [NM_006431]	CTGTGGAATCTGTTTATCGGTGCCCATTATATCCTTAAGTTTGGATATTTAGCTGACCTT	10576	chaperonin containing TCP1, subunit 2 (beta)	NM_006431	14.7359	14.4312	14.9681	14.5049	1.23515	1.37852
A_23_P105409	13	MAP3K12	Homo sapiens mitogen-activated protein kinase kinase kinase 12 (MAP3K12), transcript variant 2, mRNA [NM_006301]	TCTACCTTCAGCTCAGAGAATCCATCAGATGGGGAGGAAGGCACAGCTAGTGAACCTTCC	7786	mitogen-activated protein kinase kinase kinase 12	NM_006301	1.94591	4.05584	6.25952	5.14878	0.231658	2.15957
A_23_P105436	16	PTPN11	Homo sapiens protein tyrosine phosphatase, non-receptor type 11 (PTPN11), transcript variant 1, mRNA [NM_002834]	CATCAATGCAAATATCATCATGCCTGAATTTGAAACCAAGTGCAACAATTCAAAGCCCAA	5781	protein tyrosine phosphatase, non-receptor type 11	NM_002834	9.33493	9.24625	9.58822	9.2016	1.0634	1.30733
A_23_P105495	16	TAS2R14	Homo sapiens taste receptor, type 2, member 14 (TAS2R14), mRNA [NM_023922]	CAGCACCAAAGCCCACAGAGGAGTTAAAAGTGTGATCACTTTCTTCCTACTCTATGCCAT	50840	taste receptor, type 2, member 14	NM_023922	7.12485	6.54987	5.75554	5.40153	1.48966	1.27811
A_23_P105519	16	WBP11	Homo sapiens WW domain binding protein 11 (WBP11), mRNA [NM_016312]	TAAACTTAGATGAAAGAGCTGCTTCCATTGTCAGGGTATTTTCTAATTTCAGTTCAAGGA	51729	WW domain binding protein 11	NM_016312	11.3153	11.216	11.9939	11.8795	1.07129	1.0825
A_23_P105535	16	POC1B	Homo sapiens POC1 centriolar protein B (POC1B), transcript variant 1, mRNA [NM_172240]	ACACATGCTTCAGAAATATTGTTGCTTAGGGTGATTTGGGCAGCTAAATAGTAAGTACTT	282809	POC1 centriolar protein B	NM_172240	10.1872	9.41654	9.5845	9.49763	1.70599	1.06206
A_23_P105545	16	VAMP1	Homo sapiens vesicle-associated membrane protein 1 (synaptobrevin 1) (VAMP1), transcript variant 3, mRNA [NM_016830]	CAGGAGCATCACAATTTGAGAGCAGTGCTGCCAAGCTAAAGAGGAAGTATTGGTGGAAAA	6843	vesicle-associated membrane protein 1 (synaptobrevin 1)	NM_016830	8.96307	9.23825	8.23144	7.97902	0.826351	1.1912
A_23_P105562	2	VWF	Homo sapiens von Willebrand factor (VWF), mRNA [NM_000552]	TGTACCATGAGGTTCTCAATGCCATGGAGTGCAAATGCTCCCCCAGGAAGTGCAGCAAGT	7450	von Willebrand factor	NM_000552	1.86951	1.86388	3.42601	3.89409	1.00391	0.722928
A_23_P105571	4	CHPT1	Homo sapiens choline phosphotransferase 1 (CHPT1), mRNA [NM_020244]	AATTCAGATAGCTTTAGTGATTGTCTTTGTGTTGTCTGCATTTGGAGGAGCAACAATGTG	56994	choline phosphotransferase 1	NM_020244	8.4981	8.67656	1.86455	1.91836	0.883646	0.96339
A_23_P10559	5	AATK	Homo sapiens apoptosis-associated tyrosine kinase (AATK), transcript variant 1, mRNA [NM_001080395]	GGAAGTTGGGTGATTTTAAGTTATTGTTGCCAAAGAGATGTAAAGTTTATTGTTGCTTCG	9625	apoptosis-associated tyrosine kinase	NM_001080395	4.32735	2.96463	3.12216	6.78529	2.5717	0.078938
A_23_P105592	16	MVK	Homo sapiens mevalonate kinase (MVK), transcript variant 1, mRNA [NM_000431]	AGGGGCTGTCCCGGAGGCGGTGGGCCTGGTTAAATAAGGCAGGGTTTATATGCACTTTCT	4598	mevalonate kinase	NM_000431	12.0558	12.0598	11.3125	11.6318	0.99723	0.801438
A_23_P1056	16	GPR89B	Homo sapiens G protein-coupled receptor 89B (GPR89B), mRNA [NM_016334]	AGAGGCCAGTGGTTTCAAAATTTAGATATAAGAGGGGGGAAAAATGGAACCAGGGCCTGA	51463	G protein-coupled receptor 89B	NM_016334	8.57438	8.66534	9.17755	8.98639	0.938902	1.14168
A_23_P105619	16	TMEM116	Homo sapiens transmembrane protein 116 (TMEM116), transcript variant 3, mRNA [NM_138341]	AGGCTCGGCGTGATGCAGATACCCAGACACCATTATTATGCTCACAGAAGAGATTCTATA	89894	transmembrane protein 116	NM_138341	8.13093	7.99375	9.20545	8.57961	1.09975	1.54311
A_23_P105625	16	COQ5	Homo sapiens coenzyme Q5 homolog, methyltransferase (S. cerevisiae) (COQ5), mRNA [NM_032314]	AGGCATTTGGTCTGTATCTTTGCTCAACTGCTAATTTCTCTTGGCTGTAGGGTGTGTGGT	84274	coenzyme Q5 homolog, methyltransferase (S. cerevisiae)	NM_032314	11.601	11.7473	11.5449	11.0978	0.903535	1.36329
A_23_P105651	9	PDZRN4	Homo sapiens PDZ domain containing ring finger 4 (PDZRN4), transcript variant 2, mRNA [NM_013377]	TCGGTAGAGTATGATTGCCTCGTTCAATGTGGCGTTTTTATATATATTTTGTGACTCTTT	29951	PDZ domain containing ring finger 4	NM_013377	6.04557	7.22366	4.03655	1.67721	0.441938	5.13136
A_23_P105664	16	CCDC59	Homo sapiens coiled-coil domain containing 59 (CCDC59), transcript variant 1, mRNA [NM_014167]	CAGGTTAAAATATCTGCTGCCTATTAGGTTCTTCTGTGACATGTGCCTCCCAGCAGTGAA	29080	coiled-coil domain containing 59	NM_014167	11.5954	11.5872	11.6267	11.6766	1.00573	0.966005
A_23_P105730	16	MDM1	Homo sapiens Mdm1 nuclear protein homolog (mouse) (MDM1), transcript variant 2, mRNA [NM_020128]	TGCGCTTCAAGGGGCTGAGTGAATACCAGAGGAACTTCCTGTGGAAAAAGTCTTATTTGT	56890	Mdm1 nuclear protein homolog (mouse)	NM_020128	7.17008	7.27256	6.62371	6.46284	0.931432	1.11796
A_23_P105747	16	APPL2	Homo sapiens adaptor protein, phosphotyrosine interaction, PH domain and leucine zipper containing 2 (APPL2), transcript variant 1, mRNA [NM_018171]	GATTTCCGAAGGCTGACAATCGTTTGTGGAATGTAATCTTGATGCCTTGATACTGAGACT	55198	adaptor protein, phosphotyrosine interaction, PH domain and leucine zipper containing 2	NM_018171	7.11422	6.37778	7.35453	7.12125	1.66606	1.1755
A_23_P105794	14	EPSTI1	Homo sapiens epithelial stromal interaction 1 (breast) (EPSTI1), transcript variant 2, mRNA [NM_033255]	AGAAGAGAAGCATTTAGAGAGCATCAGCAATACAAAACCGCTGAGTTCTTGAGCAAACTG	94240	epithelial stromal interaction 1 (breast)	NM_033255	6.46754	6.52655	4.3071	5.34157	0.959924	0.488193
A_23_P105833	2	BIVM	Homo sapiens basic, immunoglobulin-like variable motif containing (BIVM), transcript variant 1, mRNA [NM_017693]	ATTTCATGAGTCTAGTAGTTCTTTGATTTATAGCAGGATCTTGCTTGCCTCATTTGTTTC	54841	basic, immunoglobulin-like variable motif containing	NM_017693	3.19219	1.94808	1.90408	1.93467	2.36872	0.979017
A_23_P105862	15	FRY	Homo sapiens furry homolog (Drosophila) (FRY), mRNA [NM_023037]	ATATGTAAAGGGCCATTCTTAAGTTCTCTCCTTAAACTTAATGCTGTCAAGTGTTAGATG	10129	furry homolog (Drosophila)	NM_023037	10.0041	10.3067	6.61304	6.44046	0.810777	1.12707
A_23_P10591	16	METRNL	Homo sapiens meteorin, glial cell differentiation regulator-like (METRNL), mRNA [NM_001004431]	AGCTTCCAGCCAAGGATGCCCTGGCCGATTGGAAATGCTGTAAAATGCAAACTAAGTTAT	284207	meteorin, glial cell differentiation regulator-like	NM_001004431	12.2772	12.3752	14.3079	14.3322	0.934323	0.983261
A_23_P105957	1	ACTN1	Homo sapiens actinin, alpha 1 (ACTN1), transcript variant 2, mRNA [NM_001102]	TTCCTTCAAGATCCTGGCTGGGGACAAGAACTACATTACCATGGACGAGCTGCGCCGCGA	87	actinin, alpha 1	NM_001102	2.89361	1.79904	1.79293	1.78725	2.13549	1.00394
A_23_P105963	2	AK7	Homo sapiens adenylate kinase 7 (AK7), mRNA [NM_152327]	CTGGAGGCTCAGTCAATTCCCCTGAGAAACTATTTAATGACCTATGTGATGCCAACTCTT	122481	adenylate kinase 7	NM_152327	1.69262	1.68919	1.69346	1.93147	1.00238	0.847913
A_23_P105973	9	SERPINA11	Homo sapiens serpin peptidase inhibitor, clade A (alpha-1 antiproteinase, antitrypsin), member 11 (SERPINA11), mRNA [NM_001080451]	GGTTTTCAATTTCTGGAACATATAACCTGGAAGACATACTTCCCCAAATTGGTCTCACCA	256394	serpin peptidase inhibitor, clade A (alpha-1 antiproteinase, antitrypsin), member 11	NM_001080451	5.94791	4.47825	2.99192	4.26794	2.76957	0.412935
A_23_P106002	16	NFKBIA	Homo sapiens nuclear factor of kappa light polypeptide gene enhancer in B-cells inhibitor, alpha (NFKBIA), mRNA [NM_020529]	TGATGTGGGGTGAAAAGTTACTACCTGTCAAGGTTTGTGTTACCCTCCTGTAAATGGTGT	4792	nuclear factor of kappa light polypeptide gene enhancer in B-cells inhibitor, alpha	NM_020529	11.663	11.8239	10.1798	10.3869	0.894464	0.866298
A_23_P106024	13	JAG2	Homo sapiens jagged 2 (JAG2), transcript variant 1, mRNA [NM_002226]	GCGTTTGTTACCAGAGGTTGTGCACTGTTTACAGAATCTTCCTTTTATTCCTCACTCGGG	3714	jagged 2	NM_002226	5.79557	6.33472	6.00095	7.06863	0.688174	0.477085
A_23_P106056	16	DAD1	Homo sapiens defender against cell death 1 (DAD1), mRNA [NM_001344]	TTCTGGAGATGGCAGCTTATTGGACACATGGATTTTCTTCAGATTTGCACTTACTGCTAG	1603	defender against cell death 1	NM_001344	13.2176	13.2754	13.8161	13.7596	0.960726	1.03995
A_23_P106080	1	RNASE7	Homo sapiens ribonuclease, RNase A family, 7 (RNASE7), mRNA [NM_032572]	GGTGGCAGAGATCCCAGTCAGTGCCAAGCCCAAGGGCATGACCTCATCACAGTGGTTTAA	84659	ribonuclease, RNase A family, 7	NM_032572	2.86374	3.24994	3.60279	3.66878	0.765144	0.955293
A_23_P106103	1	AKAP5	Homo sapiens A kinase (PRKA) anchor protein 5 (AKAP5), mRNA [NM_004857]	TGGTTTTGAGGATAGAACTTCAGAACAATATGAAACACTCTTAATTGAAACAGCCTCTTC	9495	A kinase (PRKA) anchor protein 5	NM_004857	1.98218	1.97008	2.59171	2.83357	1.00842	0.84565
A_23_P106127	16	KIAA0586	Homo sapiens KIAA0586 (KIAA0586), transcript variant 5, mRNA [NM_014749]	CATTTTACCTTGGCTTAAAACCCTCTCTCAGACTGTTTGGTTTTTGAGCATATTCTGAAA	9786	KIAA0586	NM_014749	9.96103	9.58628	10.2739	9.6788	1.29661	1.51058
A_23_P106158	16	L2HGDH	Homo sapiens L-2-hydroxyglutarate dehydrogenase (L2HGDH), mRNA [NM_024884]	CAGTTCTTGCCTTTAAACGAGAGGGTTACAGACCCTTTGACTTCAGTGCCACAGATGTTA	79944	L-2-hydroxyglutarate dehydrogenase	NM_024884	7.84987	7.73312	7.63461	7.54282	1.08429	1.06569
A_23_P106194	15	FOS	Homo sapiens FBJ murine osteosarcoma viral oncogene homolog (FOS), mRNA [NM_005252]	AGAGGGTTCCTGTAGACCTAGGGAGGACCTTATCTGTGCGTGAAACACACCAGGCTGTGG	2353	FBJ murine osteosarcoma viral oncogene homolog	NM_005252	3.25746	6.90654	9.73104	8.02441	0.0797111	3.26397
A_23_P106204	16	GSTZ1	Homo sapiens glutathione S-transferase zeta 1 (GSTZ1), transcript variant 1, mRNA [NM_145870]	TACCCTACCATCAGCTCCATCAACAAGAGGCTGCTGGTCTTGGAGGCCTTCCAGGTGTCT	2954	glutathione S-transferase zeta 1	NM_145870	9.37473	8.72275	9.15119	10.0255	1.57132	0.545501
A_23_P106241	16	TRIP11	Homo sapiens thyroid hormone receptor interactor 11 (TRIP11), mRNA [NM_004239]	TATCACAAAGTGGCCTTTGGGGAGAAAGTCATGTATTTGTTCGCAATTATGCTTTCTCTG	9321	thyroid hormone receptor interactor 11	NM_004239	9.7459	9.45148	10.7047	10.1651	1.2264	1.4536
A_23_P106258	13	SLC25A47	Homo sapiens solute carrier family 25, member 47 (SLC25A47), mRNA [NM_207117]	TTTGATGAGAGCGTTGAGTTGCATGGAGTCGGTTGTTCATCCCAGCCTCCCCATGGCCCT	283600	solute carrier family 25, member 47	NM_207117	4.87702	4.64447	4.69583	5.36937	1.17491	0.626969
A_23_P106299	16	SERF2	Homo sapiens small EDRK-rich factor 2 (SERF2), transcript variant 3, mRNA [NM_001018108]	GCAGAAAAAGGCAAACGAGAAGAAGGAGGAACCCAAGTAGCTTTGTGGCTTCGTGTCCAA	10169	small EDRK-rich factor 2	NM_001018108	15.25	14.8701	15.6172	15.5843	1.30123	1.02302
A_23_P106371	16	GOLGA6A	Homo sapiens golgin A6 family, member A (GOLGA6A), mRNA [NM_001038640]	GAATTCAAACACACAAAGACCCACTAATTTGCACAAAACTATTCTGGCTGGTTTGGAACA	342096	golgin A6 family, member A	NM_001038640	6.47808	6.36753	7.85873	8.68174	1.07964	0.565262
A_23_P106389	12	SEMA7A	Homo sapiens semaphorin 7A, GPI membrane anchor (John Milton Hagen blood group) (SEMA7A), transcript variant 1, mRNA [NM_003612]	GCCTTGCATGTTTATTGAAGGATGTTTGCTTTCCGGACGGAAGGACGGAAAAAGCTCTAT	8482	semaphorin 7A, GPI membrane anchor (John Milton Hagen blood group)	NM_003612	2.34149	2.2574	9.48654	9.06591	1.06002	1.33851
A_23_P106391	12	THAP10	Homo sapiens THAP domain containing 10 (THAP10), mRNA [NM_020147]	GTACCATGAAGTAAACTGTTACAATAGTTTCTGAGAAGCATACTATAACTCTGATCTTCC	56906	THAP domain containing 10	NM_020147	2.02426	2.03916	7.335	5.6127	0.98972	3.2996
A_23_P106405	1	NDN	Homo sapiens necdin, melanoma antigen (MAGE) family member (NDN), mRNA [NM_002487]	AATACATTGAGAAAGTTTCCATCTTATTCTTTTATATGGGACTGATGATGTGTGTTGGGG	4692	necdin, melanoma antigen (MAGE) family member	NM_002487	1.98978	1.9803	1.93724	1.98427	1.00659	0.967929
A_23_P106433	16	RCCD1	Homo sapiens RCC1 domain containing 1 (RCCD1), transcript variant 1, mRNA [NM_033544]	TTGCTTTTGAGTGTTAGATAAATGGAATCCTGTGTATGTGCTTTTGTGTCGTTTTTGTCA	91433	RCC1 domain containing 1	NM_033544	11.1618	11.5779	10.8808	10.8585	0.749419	1.01561
A_23_P106463	16	OAZ2	Homo sapiens ornithine decarboxylase antizyme 2 (OAZ2), transcript variant 1, mRNA [NM_002537]	CCAAGGTCTCCTTCTTGGGGTCACAAACAGCAGTAAGGAAGAGGAATATATAGCAACTCA	4947	ornithine decarboxylase antizyme 2	NM_002537	10.2402	9.50949	10.7693	10.2059	1.65945	1.47778
A_23_P106481	16	EMC4	Homo sapiens ER membrane protein complex subunit 4 (EMC4), transcript variant 1, mRNA [NM_016454]	TCTTCAGGGTTTGGTCTATCTCATTGGGAACCTGATGGGTTTGGCATTGGCTGTTTACAA	51234	ER membrane protein complex subunit 4	NM_016454	12.1402	12.1424	12.8871	12.7059	0.998487	1.13385
A_23_P106505	16	LCMT2	Homo sapiens leucine carboxyl methyltransferase 2 (LCMT2), mRNA [NM_014793]	CCTTGTGATTTGAGATGGTACCTTAGAAAAAGTTACACGCAGTTCCGTGGTTGAATATAT	9836	leucine carboxyl methyltransferase 2	NM_014793	8.56105	7.50128	8.01138	8.30425	2.0846	0.816281
A_23_P106544	16	CMC2	Homo sapiens C-x(9)-C motif containing 2 (CMC2), mRNA [NM_020188]	TCTGGGTTGATACCTGAAAGAATCCTGTCTTATTTGGTCTCCATAATCCTTTGAATGGAA	56942	C-x(9)-C motif containing 2	NM_020188	11.7901	11.6884	11.8078	11.6971	1.07301	1.0798
A_23_P106562	16	GALNS	Homo sapiens galactosamine (N-acetyl)-6-sulfatase (GALNS), mRNA [NM_000512]	AACTGGGCGGTCATGAACTGGGCACCTCCGGGCTGTGAAAAGTTAGGGAAGTGTCTGACA	2588	galactosamine (N-acetyl)-6-sulfatase	NM_000512	6.57935	6.292	6.34082	6.04838	1.2204	1.22471
A_23_P106602	1	CRISPLD2	Homo sapiens cysteine-rich secretory protein LCCL domain containing 2 (CRISPLD2), mRNA [NM_031476]	CAAAGCATCCCACTCAAGGGAGACTTGAAACTTCCAGTGTGAGTTGACCCCATCATTTAA	83716	cysteine-rich secretory protein LCCL domain containing 2	NM_031476	2.00611	2.0214	1.96346	2.00604	0.989459	0.97092
A_23_P106633	16	DDX28	Homo sapiens DEAD (Asp-Glu-Ala-Asp) box polypeptide 28 (DDX28), mRNA [NM_018380]	GAAGCTGCTGAGCATGGCTTTCTGTAGTCTTTAGCAAGACACAAGTGGATTTTGACTTTG	55794	DEAD (Asp-Glu-Ala-Asp) box polypeptide 28	NM_018380	11.2783	10.9424	11.2985	11.5901	1.26217	0.817007
A_23_P106661	16	CMTM1	Homo sapiens CKLF-like MARVEL transmembrane domain containing 1 (CMTM1), transcript variant 17, mRNA [NM_052999]	TCGCATGCTGTCACCCATTCCAGCCTAAATGTGACCATAAAATTAGGGCTGCTGCTTTTA	113540	CKLF-like MARVEL transmembrane domain containing 1	NM_052999	7.94208	8.12639	6.08752	5.12463	0.880074	1.94921
A_23_P106675	16	PLCG2	Homo sapiens phospholipase C, gamma 2 (phosphatidylinositol-specific) (PLCG2), mRNA [NM_002661]	GAGTCAGCAACAGCAAGTTTTACTCATAGAAGCTGGGGTATGTGTGTAAGGGTATTGTGT	5336	phospholipase C, gamma 2 (phosphatidylinositol-specific)	NM_002661	14.2103	14.112	14.6456	14.6361	1.07047	1.00662
A_23_P106682	13	EMP2	Homo sapiens epithelial membrane protein 2 (EMP2), mRNA [NM_001424]	TTCCGGAGCTGGGTTGCTTCTGCTGCAGTACAGAATCCACATTCAGATAACCATTTTGTA	2013	epithelial membrane protein 2	NM_001424	4.42239	4.36726	4.28711	5.02172	1.03896	0.600979
A_23_P106694	16	CHMP1A	Homo sapiens charged multivesicular body protein 1A (CHMP1A), transcript variant 2, mRNA [NM_002768]	GGCTCACTGCATTTGGTTTTCTTTTCAGAACTTGGGAGCCCCCAGGGAGGGGCTAGTGTT	5119	charged multivesicular body protein 1A	NM_002768	9.83955	9.84029	9.96317	8.95679	0.999489	2.00886
A_23_P106708	16	RPS2	Homo sapiens ribosomal protein S2 (RPS2), mRNA [NM_002952]	GTGCAGCGGACTCAGGCTCCAGCTGTGGCTACAACATAGGGTTTTTATACAAGAAAATAA	6187	ribosomal protein S2	NM_002952	18.6251	18.6251	18.6991	18.7902	1	0.938788
A_23_P106720	16	TBL3	Homo sapiens transducin (beta)-like 3 (TBL3), mRNA [NM_006453]	GCTGTGCCAAGGATCAGAGCGTCCGTATCTGGAGAATGAACAAGGCTGGCCAGGTGATGT	10607	transducin (beta)-like 3	NM_006453	7.09502	6.10849	7.23531	7.21908	1.9814	1.01132
A_23_P106727	16	RAB11FIP3	Homo sapiens RAB11 family interacting protein 3 (class II) (RAB11FIP3), transcript variant 1, mRNA [NM_014700]	AGAGGTCGCCTCCTATTGTACATTTGGGGAAAGCCTTGGGTGTAAATCAGTGTAAACTTG	9727	RAB11 family interacting protein 3 (class II)	NM_014700	8.71156	8.63956	9.87278	9.7495	1.05117	1.08921
A_23_P106737	16	LUC7L	Homo sapiens LUC7-like (S. cerevisiae) (LUC7L), transcript variant 2, mRNA [NM_201412]	CTGAAGGTAATGTGGATGAATCCCAGAAGATTCTTATGGAAGTGGAAAAAGTTCGTGCGA	55692	LUC7-like (S. cerevisiae)	NM_201412	9.69206	9.86465	9.61678	9.79673	0.887248	0.882732
A_23_P106741	16	PSMD7	Homo sapiens proteasome (prosome, macropain) 26S subunit, non-ATPase, 7 (PSMD7), mRNA [NM_002811]	CATAGCTCTGGCATCCTCAGGGGTTGTGATCCAGCTCCATATATTGTTTACCTTCAAAGA	5713	proteasome (prosome, macropain) 26S subunit, non-ATPase, 7	NM_002811	12.2406	12.2836	12.8255	12.5578	0.970585	1.20388
A_23_P106761	16	CORO1A	Homo sapiens coronin, actin binding protein, 1A (CORO1A), transcript variant 2, mRNA [NM_007074]	TATCTCTCCATGTTCAGTTCCAAGGAGTCCCAGCGGGGCATGGGCTACATGCCCAAACGT	11151	coronin, actin binding protein, 1A	NM_007074	11.2866	11.2759	11.7346	10.8143	1.00743	1.89246
A_23_P106773	16	SULT1A2	Homo sapiens sulfotransferase family, cytosolic, 1A, phenol-preferring, member 2 (SULT1A2), transcript variant 2, mRNA [NM_177528]	AGAGGGAGTGTGCGAATCAAGCCTGACCAAGAGGCTCCAGAATAAAGTATGATTTGTGTT	6799	sulfotransferase family, cytosolic, 1A, phenol-preferring, member 2	NM_177528	12.3939	12.6232	10.7239	10.2916	0.853011	1.34937
A_23_P106798	16	SIAH1	Homo sapiens siah E3 ubiquitin protein ligase 1 (SIAH1), transcript variant 1, mRNA [NM_003031]	TTGCAACAGCCATTATGAATAGCGACTGTCTAGTCTTTGACACCAGCATTGCACAGCTTT	6477	siah E3 ubiquitin protein ligase 1	NM_003031	7.1353	7.80244	8.3426	8.63919	0.629758	0.814176
A_23_P106806	11	PRSS27	Homo sapiens protease, serine 27 (PRSS27), mRNA [NM_031948]	AACCCAAAACCATCAAGAATGACATGCTGTGCGCCGGCTTCGAGGAGGGCAAGAAGGATG	83886	protease, serine 27	NM_031948	3.43393	4.23464	5.41545	5.98936	0.574069	0.671794
A_23_P106822	16	NOB1	Homo sapiens NIN1/RPN12 binding protein 1 homolog (S. cerevisiae) (NOB1), transcript variant 1, mRNA [NM_014062]	CTTCCAGAAAGAAGTTTGTGAAGAAAAGGTGAAGAGCGAGTTCCCGCAGGCAAATTGGAT	28987	NIN1/RPN12 binding protein 1 homolog (S. cerevisiae)	NM_014062	11.5102	11.4549	11.1109	11.152	1.03905	0.971912
A_23_P106835	16	BBS2	Homo sapiens Bardet-Biedl syndrome 2 (BBS2), mRNA [NM_031885]	TGGGGACAGCTTCTTCCTAGGTGAGGAAAATACAGGTCATGAAGTTCCTGGCAAAGATTT	583	Bardet-Biedl syndrome 2	NM_031885	10.3017	10.3828	10.4498	10.7302	0.945295	0.82332
A_23_P106844	16	MT2A	Homo sapiens metallothionein 2A (MT2A), mRNA [NM_005953]	CAACCCTGACCGTGACCGTTTGCTATATTCCTTTTTCTATGAAATAATGTGAATGATAAT	4502	metallothionein 2A	NM_005953	14.9625	14.6807	16.6113	16.7995	1.21567	0.877682
A_23_P10685	16	HSPBP1	Homo sapiens HSPA (heat shock 70kDa) binding protein, cytoplasmic cochaperone 1 (HSPBP1), transcript variant 1, mRNA [NM_012267]	ATGCTCTCACTCTCATCCCCGTTCTCTTGTCCACACAGCTCTTCCAATAAAGGTGTTTCT	23640	HSPA (heat shock 70kDa) binding protein, cytoplasmic cochaperone 1	NM_012267	12.3055	11.8233	12.5904	12.3096	1.39685	1.21491
A_23_P106859	16	EMC8	Homo sapiens ER membrane protein complex subunit 8 (EMC8), transcript variant 1, mRNA [NM_006067]	CTATAATCCTCCAAATCAAAGCTCTTTCTGCTTGTGCAAGATTGTTCCTATTAAACAGTT	10328	ER membrane protein complex subunit 8	NM_006067	11.3561	11.4752	12.2331	11.6676	0.92077	1.47981
A_23_P106874	9	PMFBP1	Homo sapiens polyamine modulated factor 1 binding protein 1 (PMFBP1), transcript variant 1, mRNA [NM_031293]	GTATATCACGGTCCCAGCCTATTTTGCAAGACACTAACTTTTGTTGAGTTTTGTCCACTT	83449	polyamine modulated factor 1 binding protein 1	NM_031293	1.81674	2.92866	4.47679	3.45631	0.46268	2.0286
A_23_P106887	16	FUS	Homo sapiens FUS RNA binding protein (FUS), transcript variant 1, mRNA [NM_004960]	TATTGACTGGTTTGATGGTAAAGAATTCTCCGGAAATCCTATCAAGGTCTCATTTGCTAC	2521	FUS RNA binding protein	NM_004960	7.87024	7.67748	8.36425	7.78918	1.14295	1.48975
A_23_P106898	16	ORAI3	Homo sapiens ORAI calcium release-activated calcium modulator 3 (ORAI3), mRNA [NM_152288]	GCCACCATTTCCATTCCTATACAGGATGTGAAGGTCAGAAGGCAGCCAATTGTTGGTTTA	93129	ORAI calcium release-activated calcium modulator 3	NM_152288	8.40658	8.46446	9.09792	9.28506	0.960677	0.878345
A_23_P106906	11	PPL	Homo sapiens periplakin (PPL), mRNA [NM_002705]	TCCCTTTTCCTGTACACTCCCAGCAACAAACTCCTCATGATAACTGCACACAATCTGAAA	5493	periplakin	NM_002705	1.78606	1.76313	5.57197	3.4972	1.01602	4.21278
A_23_P106922	12	CHST6	Homo sapiens carbohydrate (N-acetylglucosamine 6-O) sulfotransferase 6 (CHST6), mRNA [NM_021615]	GGCCAGCTGAGCCCAGCACTGCGGCCAAGTCGAAGCTTTAGGAGCAATAAAAGTGCTTAT	4166	carbohydrate (N-acetylglucosamine 6-O) sulfotransferase 6	NM_021615	3.00554	3.26192	5.85967	7.08563	0.837183	0.427515
A_23_P106973	16	2009-09-01	Homo sapiens septin 9 (SEPT9), transcript variant 3, mRNA [NM_006640]	AGGCTCTGTTCCTCAATGGCCTTTTGCTACGTGCCTCCCGAGAAATTTGTCTTTTTGTAT	10801	septin 9	NM_006640	16.0066	16.1599	16.1699	15.8295	0.899207	1.2661
A_23_P106998	16	MRPS23	Homo sapiens mitochondrial ribosomal protein S23 (MRPS23), mRNA [NM_016070]	TAGAGCGAAGTTTTATTCAGTGTATGGGTCTGGTCAAAGAGCTTTTGATCTATTCAATCC	51649	mitochondrial ribosomal protein S23	NM_016070	10.167	9.90825	10.4107	10.0802	1.19644	1.2574
A_23_P107036	16	TMEM11	Homo sapiens transmembrane protein 11 (TMEM11), transcript variant 1, mRNA [NM_003876]	CAGATCACGGGTGTACCCAGGGTTTTTCAGCTCATTACACTAAGATGTGGATTTCCATAA	8834	transmembrane protein 11	NM_003876	11.3504	11.2438	12.1104	12.1837	1.07671	0.950428
A_23_P107051	16	TCAP	Homo sapiens titin-cap (TCAP), mRNA [NM_003673]	AGGCAAGGATGGTGGGGCCCCCAGCACCCTCTGTTAGTGCCGCAATAAATGCTCAATCAT	8557	titin-cap	NM_003673	7.35044	7.84644	8.18544	7.20175	0.709073	1.97751
A_23_P107073	16	RPA1	Homo sapiens replication protein A1, 70kDa (RPA1), mRNA [NM_002945]	GGCTACAAAGCGTTTCTTTACTTTTCACTTCAATTAATGCTGCGCTTCGCTTGGTGAGTG	6117	replication protein A1, 70kDa	NM_002945	13.1287	13.0038	12.5256	12.6018	1.09046	0.948521
A_23_P107116	16	RNF112	Homo sapiens ring finger protein 112 (RNF112), mRNA [NM_007148]	ACTTCTAGGCTATGAAACTGACTTCTAGGCTATGAAACTTACAGGGTATGGGTGGGCACA	7732	ring finger protein 112	NM_007148	8.44411	8.47234	6.81491	7.62738	0.980625	0.569405
A_23_P107166	16	ACBD4	Homo sapiens acyl-CoA binding domain containing 4 (ACBD4), transcript variant 2, mRNA [NM_024722]	CCAAAAGAGGTGACTGTCAGTGGAGGGGTCTCTGCAGCCAACTGAGACTATCTTGCTGTG	79777	acyl-CoA binding domain containing 4	NM_024722	5.72564	5.57197	6.14344	6.52138	1.11239	0.769534
A_23_P1072	16	ATP1A1	Homo sapiens ATPase, Na+/K+ transporting, alpha 1 polypeptide (ATP1A1), transcript variant 1, mRNA [NM_000701]	TGCCCTGGAATGGGTGTTGCTCTTAGGATGTATCCCCTCAAACCTACCTGGTGGTTCTGT	476	ATPase, Na+/K+ transporting, alpha 1 polypeptide	NM_000701	11.1271	11.0916	13.7583	13.9087	1.02497	0.900995
A_23_P107211	16	RAB5C	Homo sapiens RAB5C, member RAS oncogene family (RAB5C), transcript variant 1, mRNA [NM_201434]	TGAACGAAATCTTCATGGCAATAGCTAAGAAGCTTCCCAAGAACGAGCCCCAGAATGCAA	5878	RAB5C, member RAS oncogene family	NM_201434	7.1136	6.77733	6.98774	6.90124	1.26249	1.06179
A_23_P107247	1	CACNA1G	Homo sapiens calcium channel, voltage-dependent, T type, alpha 1G subunit (CACNA1G), transcript variant 1, mRNA [NM_018896]	GCTCTGGGTACCTGCAAGCAGAACTTCCAAAGAGAGTTAAAAGCAGCAGCCCCGGCAACT	8913	calcium channel, voltage-dependent, T type, alpha 1G subunit	NM_018896	3.33226	3.74926	1.96266	3.14644	0.748983	0.440197
A_23_P107283	2	HOXB2	Homo sapiens homeobox B2 (HOXB2), mRNA [NM_002145]	ATTAAACTCTAGGGGGACTTTCTTAAAAATAACTAGAGGGACCTATTTTCCTCTTTTTTA	3212	homeobox B2	NM_002145	3.70351	4.50917	2.88323	3.17575	0.572099	0.816479
A_23_P107307	16	SLC13A2	Homo sapiens solute carrier family 13 (sodium-dependent dicarboxylate transporter), member 2 (SLC13A2), transcript variant 2, mRNA [NM_003984]	AGCACAGGCTGCTGGGCCCCATGACCTTTGCAGAAAAGGCCATCAGCATCCTATTCGTCA	9058	solute carrier family 13 (sodium-dependent dicarboxylate transporter), member 2	NM_003984	6.14594	5.87072	5.79582	6.98494	1.21017	0.438571
A_23_P107313	16	SDF2	Homo sapiens stromal cell-derived factor 2 (SDF2), transcript variant 1, mRNA [NM_006923]	TGTAACCTCTGTGGATGACAGCAACAGTTACTGGAGGATACGGGGGAAGAGTGCCACAGT	6388	stromal cell-derived factor 2	NM_006923	8.2978	8.55468	9.10292	9.08768	0.836899	1.01062
A_23_P107322	16	CORO6	Homo sapiens coronin 6 (CORO6), mRNA [NM_032854]	ACTGGCATGAGGAGTTAGGTTCATCACAAATACACACACACTGCCCCCAACCCTCTGCCG	84940	coronin 6	NM_032854	8.14607	8.14685	7.10837	7.37526	0.999458	0.831114
A_23_P107336	16	ACAP1	Homo sapiens ArfGAP with coiled-coil, ankyrin repeat and PH domains 1 (ACAP1), mRNA [NM_014716]	GTTCACTTCTCCAAAGTCCGGTCTCTGACCCTTGACTCATGGGAGCCAGAACTAGTGAAG	9744	ArfGAP with coiled-coil, ankyrin repeat and PH domains 1	NM_014716	9.09652	9.49515	6.87525	7.38554	0.758581	0.702081
A_23_P107412	16	P4HB	Homo sapiens prolyl 4-hydroxylase, beta polypeptide (P4HB), mRNA [NM_000918]	CTGAAACCATGATGTACTTTTTCATACATGAGTCTGTCCAGAGTGCTTGCTACCGTGTTC	5034	prolyl 4-hydroxylase, beta polypeptide	NM_000918	11.6822	11.8395	12.424	12.8117	0.896666	0.764376
A_23_P107421	16	TK1	Homo sapiens thymidine kinase 1, soluble (TK1), mRNA [NM_003258]	AGGGGCTTATCTCTTCAAGTGTGGAGAGGGCAGGGTCCACGCCTCTGCTGTAGCTTATGA	7083	thymidine kinase 1, soluble	NM_003258	13.144	13.2313	14.6705	13.7116	0.941343	1.94377
A_23_P10743	1	PDE6B	Homo sapiens phosphodiesterase 6B, cGMP-specific, rod, beta (PDE6B), transcript variant 1, mRNA [NM_000283]	TCTTCAACCTGCTGTATCCTGTGAGCACTGGTCCCATGGGGACCCTATGGCTCCCTCAAT	5158	phosphodiesterase 6B, cGMP-specific, rod, beta	NM_000283	1.7026	1.70349	2.06222	1.67788	0.999382	1.30526
A_23_P107454	1	KRTAP3-1	Homo sapiens keratin associated protein 3-1 (KRTAP3-1), mRNA [NM_031958]	AATCTTCTTAATTATTTGCACATTTGGGTACCATTGGAGACCTCCCTTCTGTCTTTTAGG	83896	keratin associated protein 3-1	NM_031958	2.22113	1.90851	2.63341	3.07222	1.24196	0.737748
A_23_P107465	15	KRT31	Homo sapiens keratin 31, type I (KRT31), mRNA [NM_002277]	CTGTTCCTTCCTATGCTCACCCAGAGAACTCTCTGATGTGCCAGTGGCCCTCCCTTTTAA	3881	keratin 31, type I	NM_002277	3.98954	5.42401	5.64795	5.74123	0.369984	0.937386
A_23_P107483	4	OR3A3	Homo sapiens olfactory receptor, family 3, subfamily A, member 3 (OR3A3), mRNA [NM_012373]	TGTGGCACCCTTGGTCTTCATCAGTGTGTCCTATGCCCATGTGGTAGCTGCTGTGCTGCA	8392	olfactory receptor, family 3, subfamily A, member 3	NM_012373	1.99554	3.48264	3.6706	3.41845	0.35673	1.19098
A_23_P107513	16	CEP76	Homo sapiens centrosomal protein 76kDa (CEP76), transcript variant 1, mRNA [NM_024899]	ATGTCTTCGATCTCCTTTCTGTGAAGAAATAATCTGTTGCCGTGGAGACCAAGTGCGACT	79959	centrosomal protein 76kDa	NM_024899	8.40619	7.99621	8.40064	7.98332	1.32866	1.33545
A_23_P107587	16	NPC1	Homo sapiens Niemann-Pick disease, type C1 (NPC1), mRNA [NM_000271]	ATTTCTCCCTGTCTTACTCAGTTACATAGGGCCATCAGTAAATAAAGCCAAAAGTTGTGC	4864	Niemann-Pick disease, type C1	NM_000271	8.55468	8.6646	8.5935	8.78032	0.926634	0.878543
A_23_P107612	2	RAB27B	Homo sapiens RAB27B, member RAS oncogene family (RAB27B), mRNA [NM_004163]	ATGTATCTGCTAGACTCTACATAGAAACTGAACATCAAGAACCCCACCAAAATATTACTT	5874	RAB27B, member RAS oncogene family	NM_004163	2.55758	2.46919	2.13327	3.74187	1.06318	0.327917
A_23_P107644	16	SNRPD1	Homo sapiens small nuclear ribonucleoprotein D1 polypeptide 16kDa (SNRPD1), transcript variant 1, mRNA [NM_006938]	GCAGAGGAAGAGGGGGTCCTAGGCGATAATGTCTCTCAAGATTTCAAAGTCATATGAGAT	6632	small nuclear ribonucleoprotein D1 polypeptide 16kDa	NM_006938	14.6086	14.2053	14.3498	14.1493	1.32252	1.14909
A_23_P107653	16	ETFB	Homo sapiens electron-transfer-flavoprotein, beta polypeptide (ETFB), transcript variant 2, mRNA [NM_001014763]	AAGCCAAGAAGAAGAAGATCGAGGTGATCAAGCCTGGGGACCTGGGTGTGGACCTGACCT	2109	electron-transfer-flavoprotein, beta polypeptide	NM_001014763	13.7812	13.5161	13.3208	13.7133	1.20164	0.761818
A_23_P107661	16	PPP2R1A	Homo sapiens protein phosphatase 2, regulatory subunit A, alpha (PPP2R1A), transcript variant 1, mRNA [NM_014225]	CTCTGACTGTTCTGTCTCTCGCCTGATGCTGGAAGAGGAGCAAACACTGGCCTCTGGTGT	5518	protein phosphatase 2, regulatory subunit A, alpha	NM_014225	10.0253	9.68004	9.92368	10.1914	1.27035	0.830647
A_23_P107684	16	ZNF324	Homo sapiens zinc finger protein 324 (ZNF324), mRNA [NM_014347]	GGATGATGTTAACTTCAGACAAGATGGAGCTGCTCACTTTTGCCGGGTTTGGTGGCCACT	25799	zinc finger protein 324	NM_014347	8.92443	8.79212	8.80253	8.75676	1.09605	1.03223
A_23_P107693	16	ZNF586	Homo sapiens zinc finger protein 586 (ZNF586), transcript variant 1, mRNA [NM_017652]	GAATGCTAGCTTCTTTACATAAAAGAGTGCTCCCACTGAAGAAGTGCCTTTTGAGTGCAA	54807	zinc finger protein 586	NM_017652	6.85135	7.60935	8.51676	8.6777	0.591316	0.894441
A_23_P107735	16	CD79A	Homo sapiens CD79a molecule, immunoglobulin-associated alpha (CD79A), transcript variant 1, mRNA [NM_001783]	TGATTGTAGCAGCCTCGTTAGTGTCACCCCCTCCTCCCTGATCTGTCAGGGCCACTTAGT	973	CD79a molecule, immunoglobulin-associated alpha	NM_001783	15.126	15.1182	15.3981	14.8814	1.00546	1.43071
A_23_P107744	1	S1PR5	Homo sapiens sphingosine-1-phosphate receptor 5 (S1PR5), transcript variant 1, mRNA [NM_030760]	ATAGAAGCTTCTAAGCAGAAGAGGGACTTGCCCTAATTCAGGTGATCACAGGTGTCTTGT	53637	sphingosine-1-phosphate receptor 5	NM_030760	2.64728	6.32183	2.20671	2.85324	0.078316	0.638814
A_23_P107775	4	TMEM190	Homo sapiens transmembrane protein 190 (TMEM190), mRNA [NM_139172]	TGCATATGCCCGGTTTCCTGGCGGGTCCGTGTGACATGTCCAAGTCCGTCTCGCTGCTCT	147744	transmembrane protein 190	NM_139172	1.95931	3.64946	3.5045	3.54184	0.309894	0.974446
A_23_P107795	16	ATP5SL	Homo sapiens ATP5S-like (ATP5SL), transcript variant 4, mRNA [NM_018035]	AATGGATTTCCAGTCAATTCAGAAGCATTTTACCAGTGAAGCCCTCATTATTCCAGTTCA	55101	ATP5S-like	NM_018035	12.536	12.8513	13.2176	13.4327	0.803699	0.86151
A_23_P107801	16	C19orf44	Homo sapiens chromosome 19 open reading frame 44 (C19orf44), transcript variant 1, mRNA [NM_032207]	CTGCTTGAGACGTGCCGCCGTGCCACACCTTCCCTAACTTCTTCTGATGTGTCTCCATTA	84167	chromosome 19 open reading frame 44	NM_032207	9.38676	9.2404	9.38986	9.22886	1.10678	1.11806
A_23_P10785	16	VTI1A	Homo sapiens vesicle transport through interaction with t-SNAREs 1A (VTI1A), mRNA [NM_145206]	GCAGTGGAAACCGAGCAAATTGGTCAGGAGATGTTGGAAAACCTTAGTCATGACAGAGAA	143187	vesicle transport through interaction with t-SNAREs 1A	NM_145206	7.8366	7.99961	8.69961	8.93576	0.893158	0.849006
A_23_P107855	16	FIZ1	Homo sapiens FLT3-interacting zinc finger 1 (FIZ1), mRNA [NM_032836]	TAGAATGGACTGATCTATGTGCACACACCCCCATCACATGGAATGGGCTGGTCTAGGCTG	84922	FLT3-interacting zinc finger 1	NM_032836	6.18919	5.89711	7.47491	7.82738	1.22441	0.783242
A_23_P107933	16	VRK3	Homo sapiens vaccinia related kinase 3 (VRK3), transcript variant 1, mRNA [NM_016440]	CCTGCATGGGTTTCGGTGTTCACCAGGACAAATACAGGTTCTTGGTGTTACCCAGCCTGG	51231	vaccinia related kinase 3	NM_016440	7.85438	7.90315	8.7542	8.96784	0.966758	0.862356
A_23_P107963	12	FUT1	Homo sapiens fucosyltransferase 1 (galactoside 2-alpha-L-fucosyltransferase, H blood group) (FUT1), mRNA [NM_000148]	AACTCAGCTGCCACGGGTGAGAGAGCAGGAGGTATGAATTAAAAGTCTACAGCACTAAAA	2523	fucosyltransferase 1 (galactoside 2-alpha-L-fucosyltransferase, H blood group)	NM_000148	2.62455	3.2759	8.46713	8.39652	0.636684	1.05016
A_23_P107994	16	TMEM160	Homo sapiens transmembrane protein 160 (TMEM160), mRNA [NM_017854]	AGCCTGCTCTGGGCGTGCGCCGTGGGCCTCTACATGGGGCAGCTGGAGCTGGACGTGGAG	54958	transmembrane protein 160	NM_017854	10.5569	10.204	10.444	10.872	1.27712	0.743288
A_23_P108028	16	ZNF146	Homo sapiens zinc finger protein 146 (ZNF146), transcript variant 1, mRNA [NM_007145]	TTGGGAATAGGGAAACATTCCTTGGAACAATTTGAGAAATACTTAGCGGTTCTACTTATG	7705	zinc finger protein 146	NM_007145	8.84048	9.002	9.44678	9.56383	0.894079	0.922071
A_23_P108075	2	SLC7A10	Homo sapiens solute carrier family 7 (neutral amino acid transporter light chain, asc system), member 10 (SLC7A10), mRNA [NM_019849]	TTCTGTTTACATGTTGTTTATTGAGGAGGTGTTTTGGCAAAAAAGTTTTGTTTTGTTTTT	56301	solute carrier family 7 (neutral amino acid transporter light chain, asc system), member 10	NM_019849	2.0888	5.36114	2.02984	2.08987	0.103496	0.959245
A_23_P108082	7	CREB3L3	Homo sapiens cAMP responsive element binding protein 3-like 3 (CREB3L3), transcript variant 1, mRNA [NM_032607]	AGCAGACACACATACAGCCTGAAACAGACCTGGACAGACAGACACAGCCTGAAACAGACC	84699	cAMP responsive element binding protein 3-like 3	NM_032607	5.2914	5.18041	3.46193	4.43997	1.07997	0.507666
A_23_P10815	16	PUM1	Homo sapiens pumilio RNA-binding family member 1 (PUM1), transcript variant 1, mRNA [NM_001020658]	CCCTTCCCTTTTGTACAGAAGATGAACTGTATTTTGCATTTTGTCTACTTGTAAGTGAAT	9698	pumilio RNA-binding family member 1	NM_001020658	11.9636	12.1286	12.5964	12.3886	0.891951	1.15488
A_23_P108157	4	TJP3	Homo sapiens tight junction protein 3 (TJP3), transcript variant 1, mRNA [NM_001267560]	GCCATCGAGCGCCTCAACTATGTGCAGTACTACCCCATTGTGGTCTTCTTCATCCCCGAG	27134	tight junction protein 3	NM_001267560	2.93362	1.79569	3.38863	3.99376	2.20065	0.657414
A_23_P108221	1	TSSK6	Homo sapiens testis-specific serine kinase 6 (TSSK6), mRNA [NM_032037]	CCCAAGAAGTACGATGTGTGGAGCATGGGCGTCGTGCTCTACGTCATGGTCACCGGGTGC	83983	testis-specific serine kinase 6	NM_032037	2.91622	2.76055	1.76478	1.75737	1.11394	1.00515
A_23_P108244	16	COX6B1	Homo sapiens cytochrome c oxidase subunit VIb polypeptide 1 (ubiquitous) (COX6B1), mRNA [NM_001863]	ATGAGCAACGGGCTGAAGGCACGTTTCCCGGGAAGATCTGAACTGGCTGCATCTCCCTTT	1340	cytochrome c oxidase subunit VIb polypeptide 1 (ubiquitous)	NM_001863	14.6323	14.7175	14.6383	15.0883	0.942628	0.732041
A_23_P108265	8	OR7C2	Homo sapiens olfactory receptor, family 7, subfamily C, member 2 (OR7C2), mRNA [NM_012377]	CAATAACATCGTGATGTATTTTGTGACCATTGTCCTGGGTGTTTTTCCTCTCTGTGGAAT	26658	olfactory receptor, family 7, subfamily C, member 2	NM_012377	5.67788	4.56612	4.07081	3.82377	2.16108	1.18677
A_23_P108294	15	PPAP2C	Homo sapiens phosphatidic acid phosphatase type 2C (PPAP2C), transcript variant 3, mRNA [NM_177543]	CAGTTCTTCCTGGTGGCCTTTGCCCTCTACGTGGGCTACACCCGCGTGTCTGATTACAAA	8612	phosphatidic acid phosphatase type 2C	NM_177543	5.32138	5.36877	5.16564	4.56306	0.967688	1.51843
A_23_P1083	1	GJA4	Homo sapiens gap junction protein, alpha 4, 37kDa (GJA4), mRNA [NM_002060]	TTTTGCAGCTGATCCAGAGGAACCCAGAGCCAACTTACCCCAACCTCACCCTATGGAACA	2701	gap junction protein, alpha 4, 37kDa	NM_002060	3.42994	3.79103	2.35479	1.95066	0.77858	1.32329
A_23_P108303	16	NDUFA7	Homo sapiens NADH dehydrogenase (ubiquinone) 1 alpha subcomplex, 7, 14.5kDa (NDUFA7), mRNA [NM_005001]	AGAATGTGACCTAATTTATGACAAATACGTAGAGCTCAGGTATCACTTCTAGTTTTACTT	4701	NADH dehydrogenase (ubiquinone) 1 alpha subcomplex, 7, 14.5kDa	NM_005001	15.3607	14.9681	14.2555	14.0654	1.31281	1.14085
A_23_P108342	15	ZNF571	Homo sapiens zinc finger protein 571 (ZNF571), transcript variant 2, mRNA [NM_016536]	AAGACTTTAGATGTCCTTCACAACTTACTCAACATACAAGGCTTCATAATTGAGAAAGCC	51276	zinc finger protein 571	NM_016536	4.05837	7.06783	8.56675	8.89316	0.124183	0.79752
A_23_P108376	16	THADA	Homo sapiens thyroid adenoma associated (THADA), transcript variant 1, mRNA [NM_022065]	CTGTGTGGAGAGCATGCATCAGGTGGAAGAAGACTACCTGTTTGAAAAAGCAGAAGTCAA	63892	thyroid adenoma associated	NM_022065	9.12988	8.50091	8.25023	8.57897	1.54647	0.796229
A_23_P108404	1	AGAP1	Homo sapiens ArfGAP with GTPase domain, ankyrin repeat and PH domain 1 (AGAP1), transcript variant 1, mRNA [NM_001037131]	CCCTATGATGGTGTGTGTCAAATCAGTTGTAGCTAATCTGTCCAGGGAGAATACTGGCTT	116987	ArfGAP with GTPase domain, ankyrin repeat and PH domain 1	NM_001037131	1.80033	1.78863	1.74673	1.79673	1.00814	0.965942
A_23_P108437	15	FZD5	Homo sapiens frizzled class receptor 5 (FZD5), mRNA [NM_003468]	AGCCAAATGAGGCACATACCGAGTCAGTAGTTGAAGTCCAGGGCATTCGATACTGTTTAT	7855	frizzled class receptor 5	NM_003468	5.43314	4.92904	5.58628	5.88088	1.41825	0.815296
A_23_P108492	9	MARS2	Homo sapiens methionyl-tRNA synthetase 2, mitochondrial (MARS2), mRNA [NM_138395]	CAGGAAAGTTATACTTGTATTTTCTTAAGTGTGGAATCAAATGAGCACATAAGCTGTGTC	92935	methionyl-tRNA synthetase 2, mitochondrial	NM_138395	3.95637	4.28569	4.85755	4.39039	0.795912	1.38238
A_23_P108501	14	EPHA4	Homo sapiens EPH receptor A4 (EPHA4), mRNA [NM_004438]	AGATGCACGGCAGAATGGTTCCCGTCTGAGCCAGTACTGAATAAACTCAAAACTCTTGAA	2043	EPH receptor A4	NM_004438	7.36989	7.02415	5.34583	5.984	1.2708	0.642526
A_23_P108514	16	STK16	Homo sapiens serine/threonine kinase 16 (STK16), transcript variant 1, mRNA [NM_001008910]	CACCCATTCCATCCAGGACTTCTCTTACACTTGAGGGTAGCGGGGTCAGGACAATCATCT	8576	serine/threonine kinase 16	NM_001008910	8.94586	8.80381	7.59909	7.87731	1.10348	0.824606
A_23_P108554	16	DDX1	Homo sapiens DEAD (Asp-Glu-Ala-Asp) box helicase 1 (DDX1), mRNA [NM_004939]	AGACATCTTTCCTGCATCTTGGCTACCTTCCTAACCAGCTGTTCAGAACCTTCTGATTTT	1653	DEAD (Asp-Glu-Ala-Asp) box helicase 1	NM_004939	12.836	12.339	12.3877	12.6605	1.41131	0.827688
A_23_P108564	1	B3GALT1	Homo sapiens UDP-Gal:betaGlcNAc beta 1,3-galactosyltransferase, polypeptide 1 (B3GALT1), mRNA [NM_020981]	TGTGTCTTCGAAAGCTGGGCATACATCCTTTCCAGAACAGTGGCTTCAATCACTGGAAAA	8708	UDP-Gal:betaGlcNAc beta 1,3-galactosyltransferase, polypeptide 1	NM_020981	1.93682	1.92424	1.86914	1.927	1.00876	0.960685
A_23_P10858	16	ANKLE2	Homo sapiens ankyrin repeat and LEM domain containing 2 (ANKLE2), mRNA [NM_015114]	AAATGATTATACGATAAAGGTATCCGTTATTTTGGAACTCATTTCAGTTGGGATCTCCTG	23141	ankyrin repeat and LEM domain containing 2	NM_015114	8.87311	8.8512	8.66063	7.80283	1.0153	1.81227
A_23_P108641	16	FAM136A	Homo sapiens family with sequence similarity 136, member A (FAM136A), mRNA [NM_032822]	ATTTTCACCAACTTATTACTTGAAATTATAATATAGCCTGTCCGTTTGCTGTTTCCAGGC	84908	family with sequence similarity 136, member A	NM_032822	12.1947	12.2542	12.8163	12.4063	0.959585	1.32873
A_23_P108657	16	WDSUB1	Homo sapiens WD repeat, sterile alpha motif and U-box domain containing 1 (WDSUB1), transcript variant 3, mRNA [NM_152528]	GCAATTTACCGAAGATTGGTCAGAGGAGGATGTCTCAACATGGCTTTGTGCACAAGATTT	151525	WD repeat, sterile alpha motif and U-box domain containing 1	NM_152528	6.06843	6.05405	7.53829	7.43232	1.01002	1.07622
A_23_P108662	16	MOGS	Homo sapiens mannosyl-oligosaccharide glucosidase (MOGS), transcript variant 1, mRNA [NM_006302]	GGCTTCTGGCTTTTGCCCCCAGCCCCTTGGATACCAGTAATTCAAACCTTCCTCATTTCA	7841	mannosyl-oligosaccharide glucosidase	NM_006302	12.5216	12.6349	12.4748	12.2593	0.924495	1.16111
A_23_P108699	1	FSHR	Homo sapiens follicle stimulating hormone receptor (FSHR), transcript variant 1, mRNA [NM_000145]	GCCTTTGCTGATCTCTGCATTGGAATCTACCTGCTGCTCATTGCATCAGTTGATATCCAT	2492	follicle stimulating hormone receptor	NM_000145	1.99385	1.969	3.0379	2.29507	1.01738	1.67345
A_23_P10870	16	DOLK	Homo sapiens dolichol kinase (DOLK), mRNA [NM_014908]	CTTTTGAGGGGACCATGACATCTATATTTGCGCAGATCATTTCTGTAGCTCTGATCTTAA	22845	dolichol kinase	NM_014908	7.17713	6.60741	8.22877	7.52357	1.48424	1.63037
A_23_P108708	16	RNF181	Homo sapiens ring finger protein 181 (RNF181), mRNA [NM_016494]	GAGACTGCCATTGAGATGCCTTGCCATCACCTTTTCCATTCCAGCTGCATTCTGCCCTGG	51255	ring finger protein 181	NM_016494	12.7302	12.7159	13.4839	14.2179	1.00999	0.601236
A_23_P10873	16	TLR1	Homo sapiens toll-like receptor 1 (TLR1), mRNA [NM_003263]	ATATTCCTCCTGTTGATATTGCTGCTTTTGGAAGTTCCAACAATGACTTTATTTTGCATC	7096	toll-like receptor 1	NM_003263	9.67064	10.0279	8.68452	8.45092	0.780634	1.17576
A_23_P108734	1	ALLC	Homo sapiens allantoicase (ALLC), mRNA [NM_018436]	CGGGTTGTGAATGGGCAGTTTTCCGATTGGCACATCCTGGAGTAATAACTCGAATTGAAA	55821	allantoicase	NM_018436	1.94418	1.93085	1.89813	3.19509	1.00929	0.406982
A_23_P108761	16	CNOT11	Homo sapiens CCR4-NOT transcription complex, subunit 11 (CNOT11), mRNA [NM_017546]	CTGGTCTTTTCCGGTTGTTGAAGACATTGGATACTGGGGAAACACCTTCTGAGACCAAAA	55571	CCR4-NOT transcription complex, subunit 11	NM_017546	9.84108	9.78253	10.4747	10.5961	1.04142	0.919244
A_23_P108785	16	ACTR3	Homo sapiens ARP3 actin-related protein 3 homolog (yeast) (ACTR3), transcript variant 1, mRNA [NM_005721]	ATAGCCTCATGAGACTTGGCATACACACTCATGGGATTCCAGTTATTATGGAGTGCTTCC	10096	ARP3 actin-related protein 3 homolog (yeast)	NM_005721	13.7116	13.4972	14.5175	14.6545	1.16029	0.909416
A_23_P108823	15	OSBPL6	Homo sapiens oxysterol binding protein-like 6 (OSBPL6), transcript variant 1, mRNA [NM_032523]	GTTTAGCAAAGTAGACAGCCCTGTTCTTTGGTAGACTGGGAATGTAGAGCTAGCCAACAT	114880	oxysterol binding protein-like 6	NM_032523	4.19998	4.94272	8.41767	8.51102	0.597607	0.93734
A_23_P108835	16	YPEL5	Homo sapiens yippee-like 5 (Drosophila) (YPEL5), transcript variant 4, mRNA [NM_016061]	AAAGTGACTTCTGAGTACAGTTAAGTTCCTCCTATTTGCCACTGGGCTGTTGGTTAGAAG	51646	yippee-like 5 (Drosophila)	NM_016061	12.7417	12.5295	13.3278	12.1104	1.15842	2.3254
A_23_P108948	16	MREG	Homo sapiens melanoregulin (MREG), mRNA [NM_018000]	TCATGCAGACTTGCACATATGCAGGGAGTATTGCACTGAAGATCTTTGCTGGACCTTCTT	55686	melanoregulin	NM_018000	6.14813	5.14482	6.52655	6.66989	2.00459	0.905422
A_23_P109026	16	KCNK15	Homo sapiens potassium channel, two pore domain subfamily K, member 15 (KCNK15), mRNA [NM_022358]	ACGAGCAGTTTCTCATTACTGTCTGTGGCTAAGTCCCCTCCCTCCTTTCCAAAAATATAT	60598	potassium channel, two pore domain subfamily K, member 15	NM_022358	10.3137	10.4667	10.5899	10.4875	0.899405	1.07353
A_23_P109034	2	SDC4	Homo sapiens syndecan 4 (SDC4), mRNA [NM_002999]	CCTGGTGCCTTCTGATGGGGCTGGAATAGTTGAGGTGGATGGTTCTACCCTTTCTGCCTT	6385	syndecan 4	NM_002999	10.6777	4.04943	2.9407	3.52609	98.9253	0.66647
A_23_P109055	15	TP53RK	Homo sapiens TP53 regulating kinase (TP53RK), mRNA [NM_033550]	GGTGAAGTGACTTGTGAAGACTGAAGTTTGATGAAGTCTGGTTTAAGGCACAGGTAAACT	112858	TP53 regulating kinase	NM_033550	5.99383	5.38475	5.85309	4.60132	1.52528	2.38133
A_23_P10911	16	PLBD2	Homo sapiens phospholipase B domain containing 2 (PLBD2), transcript variant 1, mRNA [NM_173542]	AGTTTCTGGCCATCTGTGGCTGGAGGGTTCTGAATGTCCTCTCTCCATGTCAGGCAGAGG	196463	phospholipase B domain containing 2	NM_173542	5.31509	5.02274	5.77148	5.71537	1.22463	1.03966
A_23_P109133	16	AVP	Homo sapiens arginine vasopressin (AVP), mRNA [NM_000490]	CGAGAGCTGCGTGACCGAGCCCGAGTGCCGCGAGGGCTTTCACCGCCGCGCCCGCGCCAG	551	arginine vasopressin	NM_000490	6.73844	7.04108	6.7155	6.16903	0.810769	1.4605
A_23_P109143	16	PRNP	Homo sapiens prion protein (PRNP), transcript variant 1, mRNA [NM_000311]	TATATATTGCATAGGACAGACTTAGGAGTTTTGTTTAGAGCAGTTAACATCTGAAGTGTC	5621	prion protein	NM_000311	11.1595	11.2657	12.9885	13.3677	0.929081	0.768903
A_23_P109184	1	INSM1	Homo sapiens insulinoma-associated 1 (INSM1), mRNA [NM_002196]	TGTTTCACGTAAGACTTTTTGGTTTGATCATCTTTGTTGAGGTAGGACTATCAGTTCCCT	3642	insulinoma-associated 1	NM_002196	2.09272	2.07795	2.04251	2.12906	1.0103	0.941777
A_23_P109235	16	RALY	Homo sapiens RALY heterogeneous nuclear ribonucleoprotein (RALY), transcript variant 1, mRNA [NM_016732]	TCAAGTTAAAGAGCAGTGAGCTGCAGGCCATCAAGACGGAGCTGACACAGATCAAGTCCA	22913	RALY heterogeneous nuclear ribonucleoprotein	NM_016732	8.77111	8.73189	9.21277	9.39087	1.02756	0.883864
A_23_P109254	16	RBM39	Homo sapiens RNA binding motif protein 39 (RBM39), transcript variant 1, mRNA [NM_184234]	ACAGCTACTGGTTCCAAGTAGACGATGAAGGAAGATATAGTCCCTTATGTATATAGCTTT	9584	RNA binding motif protein 39	NM_184234	12.516	12.8433	13.1964	13.5315	0.79701	0.792742
A_23_P109269	16	LAMA5	Homo sapiens laminin, alpha 5 (LAMA5), mRNA [NM_005560]	CAGGAGCTACACTGCCTGATGTGGGCCTGGAACTGGAGGTGCGGCCCCTGGCAGTCACCG	3911	laminin, alpha 5	NM_005560	7.3087	7.45215	7.16387	7.35473	0.905348	0.876084
A_23_P109286	9	GRIK1	Homo sapiens glutamate receptor, ionotropic, kainate 1 (GRIK1), transcript variant 1, mRNA [NM_000830]	TTCTCCTTACCGGGATAAAATTACTATTGCTATTCTTCAACTCCAAGAAGAAGGGAAGCT	2897	glutamate receptor, ionotropic, kainate 1	NM_000830	2.29853	6.43294	2.06193	2.19726	0.0569402	0.910461
A_23_P109322	7	PCP4	Homo sapiens Purkinje cell protein 4 (PCP4), mRNA [NM_006198]	CCCTCCTAGTCCACCTGAAAACACCAAATTCAACCATCATCTGTCAAGAAATTAAAAGAA	5121	Purkinje cell protein 4	NM_006198	5.20847	3.53479	3.92096	4.25694	3.19028	0.792247
A_23_P109333	16	C21orf33	Homo sapiens chromosome 21 open reading frame 33 (C21orf33), transcript variant 1, mRNA [NM_004649]	CTGCTGAGTGAGGAATGGCAGTGAGGTTTCTTCAATTAGTCTCAGTTCTCTTAATTTTCA	8209	chromosome 21 open reading frame 33	NM_004649	14.0557	13.4798	13.6017	13.3897	1.49052	1.15828
A_23_P109345	16	PTTG1IP	Homo sapiens pituitary tumor-transforming 1 interacting protein (PTTG1IP), transcript variant 1, mRNA [NM_004339]	AACCTGTACCCAGTTCTTCAGGCTGATTTCCCTGACCTCTTGGGCATTTGTATTTGTAGT	754	pituitary tumor-transforming 1 interacting protein	NM_004339	11.5945	11.1717	13.5972	12.898	1.3405	1.62359
A_23_P10936	1	KRTAP4-1	Homo sapiens keratin associated protein 4-1 (KRTAP4-1), mRNA [NM_033060]	TGGCCATCAGCTTTATTATCCTGTTATTCCACTAAGTAACTGGTGAAAGGGCATCCATCT	85285	keratin associated protein 4-1	NM_033060	1.95379	1.95703	1.9345	1.95331	0.997757	0.987047
A_23_P109382	1	GSC2	Homo sapiens goosecoid homeobox 2 (GSC2), mRNA [NM_005315]	CTCCCGGGCGCGGTCGGCCCGGGTTCGCAGCGGCGCACGAGGCGCCACCGCACCATCTTC	2928	goosecoid homeobox 2	NM_005315	2.8845	1.74187	2.73415	1.72442	2.20783	2.01353
A_23_P109410	16	THAP7	Homo sapiens THAP domain containing 7 (THAP7), transcript variant 1, mRNA [NM_030573]	CTTTGAGCTGGTGGGAATCAGTGGATATCACAGGCTAAAGGAGGGGGCAGTCCCCACCAT	80764	THAP domain containing 7	NM_030573	6.6467	6.70777	7.3007	7.75946	0.958549	0.72761
A_23_P109420	16	BMS1	Homo sapiens BMS1 ribosome biogenesis factor (BMS1), mRNA [NM_014753]	CAGAGTTCAGTATGAGGGTTTTCGACCTGGGATGTACGTCTGCGTTGAGATTGAAAATGT	9790	BMS1 ribosome biogenesis factor	NM_014753	12.4368	12.5675	11.506	12.4123	0.913393	0.533546
A_23_P109442	16	HPS4	Homo sapiens Hermansky-Pudlak syndrome 4 (HPS4), transcript variant 1, mRNA [NM_022081]	TGTCAGTGAACTGATATCTGATGTTTATGATATGGTGTCTTTTTCTTGAAACAAGCTTCC	89781	Hermansky-Pudlak syndrome 4	NM_022081	12.6611	12.8193	11.9627	11.8917	0.896163	1.05045
A_23_P109470	16	THOC5	Homo sapiens THO complex 5 (THOC5), transcript variant 1, mRNA [NM_001002878]	TGAGCGACTATGTACTTGAGCTAGGTCACCCCTATTTGTGGGTGCAGAAGCTGGGTGGCC	8563	THO complex 5	NM_001002878	8.21138	8.43063	8.62982	8.58861	0.859013	1.02898
A_23_P109488	16	PIK3IP1	Homo sapiens phosphoinositide-3-kinase interacting protein 1 (PIK3IP1), transcript variant 1, mRNA [NM_052880]	AGCTGTGCAGCCAGTGATTGGGATCAGCCAGCGGGTGCGGATGAACTCCAAGGAGAAAAA	113791	phosphoinositide-3-kinase interacting protein 1	NM_052880	8.08261	8.09017	6.89674	7.4288	0.994772	0.691567
A_23_P109547	16	MIEF1	Homo sapiens mitochondrial elongation factor 1 (MIEF1), mRNA [NM_019008]	GACTTGGCTGAGAACGTGTTCTGTCAGAGGATTTGTTAGAACTCTGCCCTTTTGTCTGAA	54471	mitochondrial elongation factor 1	NM_019008	10.1531	9.84803	10.4173	10.1372	1.23548	1.21425
A_23_P109593	16	TBC1D22A	Homo sapiens TBC1 domain family, member 22A (TBC1D22A), transcript variant 1, mRNA [NM_014346]	CTTTTCTCATTTCCACTTGTACGTGTGCGCTGCTTTTCTCGTGAGATGGAGGAAGGAAAT	25771	TBC1 domain family, member 22A	NM_014346	11.188	10.8705	10.5304	10.6138	1.24619	0.943829
A_23_P109636	16	LRIG1	Homo sapiens leucine-rich repeats and immunoglobulin-like domains 1 (LRIG1), mRNA [NM_015541]	AAAGGACAGCCCTTGACCTGGGTTCTGGGTATAATTTGCACTTTTGAGACTGGTAGCTAA	26018	leucine-rich repeats and immunoglobulin-like domains 1	NM_015541	11.8736	11.029	11.2981	10.3558	1.79568	1.9217
A_23_P109768	16	RNF7	Homo sapiens ring finger protein 7 (RNF7), transcript variant 1, mRNA [NM_014245]	TGGGACTCATCAAAGCCTTGGTTTAGCATTTTGTCAGTTTTATCTTCAGAAATTCTCTGC	9616	ring finger protein 7	NM_014245	14.0151	13.7786	14.1053	14.4711	1.17813	0.776035
A_23_P109774	16	ZBTB11	Homo sapiens zinc finger and BTB domain containing 11 (ZBTB11), mRNA [NM_014415]	GCCTCTCCCAGTTTACTTTAAAAATGGCTTTAAGGATAAAGAATAAATGTGATAGCTGTG	27107	zinc finger and BTB domain containing 11	NM_014415	9.28539	9.42986	10.5658	10.6155	0.90471	0.966162
A_23_P109785	1	NR1I2	Homo sapiens nuclear receptor subfamily 1, group I, member 2 (NR1I2), transcript variant 1, mRNA [NM_003889]	ACATGCACCTTATATTTCTGTGTACACATCTATTCTCAAAGCTAAAGGGTATGAAAGTGC	8856	nuclear receptor subfamily 1, group I, member 2	NM_003889	1.66723	1.67116	1.64976	1.65743	0.99728	0.9947
A_23_P109821	16	TADA3	Homo sapiens transcriptional adaptor 3 (TADA3), transcript variant 1, mRNA [NM_006354]	TCCCCTTCAAGGACTTCTCCCTTGTGGTTTTGTAAAGTGCAAACTTAAGAATAAAGTGAC	10474	transcriptional adaptor 3	NM_006354	12.51	12.8317	13.4315	13.5892	0.800144	0.896492
A_23_P109877	16	WDR82	Homo sapiens WD repeat domain 82 (WDR82), mRNA [NM_025222]	TGACTTGTTCCTCTGAAAGTGCAAGAGGCGTACACCTTTCCCAAATGTAGACTAGAATCT	80335	WD repeat domain 82	NM_025222	9.49239	9.81698	9.90825	10.1493	0.798527	0.846114
A_23_P109881	16	ITIH4	Homo sapiens inter-alpha-trypsin inhibitor heavy chain family, member 4 (ITIH4), transcript variant 1, mRNA [NM_002218]	GCCGCTTCTGGGGCCTGGACCACCATGGGGAGGAAGAGTCCCACTCATTACAAATAAAGA	3700	inter-alpha-trypsin inhibitor heavy chain family, member 4	NM_002218	7.95712	7.94569	8.87271	8.81873	1.00796	1.03813
A_23_P109895	16	SLC26A6	Homo sapiens solute carrier family 26 (anion exchanger), member 6 (SLC26A6), transcript variant 4, mRNA [NM_001040454]	GGCTGGGCACTTCTTCGATGCATCCATCACCAAGAAGCATCTCTTTGCCTCTGTCCATGA	65010	solute carrier family 26 (anion exchanger), member 6	NM_001040454	8.49155	8.75103	8.59966	8.33159	0.835387	1.20419
A_23_P109907	16	ILDR1	Homo sapiens immunoglobulin-like domain containing receptor 1 (ILDR1), transcript variant 2, mRNA [NM_175924]	CACCTGTAATCACAGCACTTTGGGAGGCTAAGAATCACTTGAGACTAGGAGTTCAAGATC	286676	immunoglobulin-like domain containing receptor 1	NM_175924	14.9063	15.2153	15.274	15.25	0.80722	1.01679
A_23_P109928	16	PSMD6	Homo sapiens proteasome (prosome, macropain) 26S subunit, non-ATPase, 6 (PSMD6), transcript variant 2, mRNA [NM_014814]	CACAGTCTTCCAGCAGTTCGGCAGTATCTGTTTTCACTCTATGAATGCCGTTACTCTGTT	9861	proteasome (prosome, macropain) 26S subunit, non-ATPase, 6	NM_014814	11.4663	11.0784	12.7678	11.4766	1.30845	2.44723
A_23_P10995	1	RBMS3	Homo sapiens RNA binding motif, single stranded interacting protein 3 (RBMS3), transcript variant 2, mRNA [NM_014483]	GGATTTTATTCTTCACCGTACAGTATTGCAACCAACCGCATGATTCCACAGACATCTATC	27303	RNA binding motif, single stranded interacting protein 3	NM_014483	2.30273	2.25401	2.1196	2.2912	1.03435	0.887856
A_23_P110005	16	NICN1	Homo sapiens nicolin 1 (NICN1), mRNA [NM_032316]	GTGGCTCAACAGTTTTCTCGGGGGAGTTCAGTGACCTTTTGGTGGCCACCCTCTGTTCTC	84276	nicolin 1	NM_032316	10.3363	10.2147	10.9596	10.1573	1.08791	1.74387
A_23_P11005	16	ADAMTS7	Homo sapiens ADAM metallopeptidase with thrombospondin type 1 motif, 7 (ADAMTS7), mRNA [NM_014272]	ACCATCCGCACCCAGTGCTGCCGCTCGTGCTCTCCGCCCAGCCACGGCGCCCCCTCCCGA	11173	ADAM metallopeptidase with thrombospondin type 1 motif, 7	NM_014272	16.8623	16.8551	16.851	16.8551	1.00501	0.997149
A_23_P110062	16	EIF2B5	Homo sapiens eukaryotic translation initiation factor 2B, subunit 5 epsilon, 82kDa (EIF2B5), mRNA [NM_003907]	CATTGAGGACTTCTTCCTAGAGCATGAAGCTCTTGGTATTTCCATGGCCAAGGTACTGAT	8893	eukaryotic translation initiation factor 2B, subunit 5 epsilon, 82kDa	NM_003907	9.74325	9.91443	9.42283	8.61227	0.888118	1.7539
A_23_P110076	16	WDR53	Homo sapiens WD repeat domain 53 (WDR53), mRNA [NM_182627]	AGAATCCTATTTGCTGCTTACTGGAGGGAATGATGGGAAGATCACGTTGTGGGATGCAAA	348793	WD repeat domain 53	NM_182627	9.34804	9.46987	9.08207	7.75025	0.919022	2.51721
A_23_P110167	15	MGST2	Homo sapiens microsomal glutathione S-transferase 2 (MGST2), transcript variant 1, mRNA [NM_002413]	AATATCTGGACCTCAATATTGCCAAGAAACTGAGGCGGCAATTCTAACTTTTTCTCTTCC	4258	microsomal glutathione S-transferase 2	NM_002413	10.5577	10.3101	11.1894	11.3326	1.18721	0.905481
A_23_P110184	16	MSMO1	Homo sapiens methylsterol monooxygenase 1 (MSMO1), transcript variant 1, mRNA [NM_006745]	GTCTTCTGGCTACTAAGTGATAAAAAGAACATTAACAACCTTTAATTACCTTCCTAGTGG	6307	methylsterol monooxygenase 1	NM_006745	8.49486	9.38499	7.79273	8.30947	0.539568	0.698952
A_23_P1102	12	ACTA1	Homo sapiens actin, alpha 1, skeletal muscle (ACTA1), mRNA [NM_001100]	CCGCAGTCACTTTCTTTGTAACAACTTCCGTTGCTGCCATCGTAAACTGACACAGTGTTT	58	actin, alpha 1, skeletal muscle	NM_001100	3.36101	3.25261	5.90581	4.72984	1.07804	2.25944
A_23_P110212	16	ACSL1	Homo sapiens acyl-CoA synthetase long-chain family member 1 (ACSL1), transcript variant 1, mRNA [NM_001995]	ACTCGGTTCTCCAGGCCTGATTCCCCGACTCCATCCTTTTTCAGGGTTATTTAAAAATCT	2180	acyl-CoA synthetase long-chain family member 1	NM_001995	10.8871	10.4704	10.244	10.1161	1.33482	1.09268
A_23_P11025	5	ZNF185	Homo sapiens zinc finger protein 185 (LIM domain) (ZNF185), transcript variant 1, mRNA [NM_001178106]	ACTAACACACAGGCACTCAATGAATGAGTGAAGGAAATAAAAGTCACCCCGTTGGTGAGA	7739	zinc finger protein 185 (LIM domain)	NM_001178106	4.68028	5.31386	3.53856	3.43209	0.644576	1.07659
A_23_P110288	16	GSTCD	Homo sapiens glutathione S-transferase, C-terminal domain containing (GSTCD), transcript variant 2, mRNA [NM_024751]	AAGCAGCAACAGTTGAACAACCTTGTCTATGTGGTAACAAATCAGGCCAAACCTGGTGAC	79807	glutathione S-transferase, C-terminal domain containing	NM_024751	5.27617	5.71233	6.89058	6.75696	0.739099	1.09704
A_23_P11032	16	SLC9A7	Homo sapiens solute carrier family 9, subfamily A (NHE7, cation proton antiporter 7), member 7 (SLC9A7), transcript variant 2, mRNA [NM_032591]	CGACCTGACATTGACCTACGGGGACAGCACAGTGACTGCAAATGGCTCCTCAAGTTCGCA	84679	solute carrier family 9, subfamily A (NHE7, cation proton antiporter 7), member 7	NM_032591	9.54659	9.28781	8.4257	8.83876	1.19646	0.751025
A_23_P110345	16	CHIC2	Homo sapiens cysteine-rich hydrophobic domain 2 (CHIC2), mRNA [NM_012110]	CCAAAGACACCGATTTTTCGACCAGATTAGCATTTACTTTATTTATAGAGACTTTCCAAG	26511	cysteine-rich hydrophobic domain 2	NM_012110	9.56186	9.45092	9.69589	9.6886	1.07993	1.00506
A_23_P110362	16	LAMTOR3	Homo sapiens late endosomal/lysosomal adaptor, MAPK and MTOR activator 3 (LAMTOR3), transcript variant 1, mRNA [NM_021970]	ACTGAGACAAGTTGTGGAAGTTTCTTAATCTGACAGTGGTTTCAGTGTGTACCTTATCTT	8649	late endosomal/lysosomal adaptor, MAPK and MTOR activator 3	NM_021970	8.95866	8.7408	9.71436	9.50077	1.16301	1.15957
A_23_P110433	16	PPWD1	Homo sapiens peptidylprolyl isomerase domain and WD repeat containing 1 (PPWD1), transcript variant 1, mRNA [NM_015342]	ACGGTAGTACCAACGCCTTGGCTTGATAATAAGCATACAGTATTTGGACGAGTGACTAAA	23398	peptidylprolyl isomerase domain and WD repeat containing 1	NM_015342	10.4068	10.5093	10.4208	10.2243	0.931405	1.14593
A_23_P110445	16	APBB3	Homo sapiens amyloid beta (A4) precursor protein-binding, family B, member 3 (APBB3), transcript variant 4, mRNA [NM_006051]	AGTAGGCTCTGGGTCCATGCCTAACTCTGTACCGTTTTATTCCTCAAGGCCTATAGCCTG	10307	amyloid beta (A4) precursor protein-binding, family B, member 3	NM_006051	9.73804	9.57802	10.7233	10.9978	1.11731	0.826704
A_23_P110473	16	NAIP	Homo sapiens NLR family, apoptosis inhibitory protein (NAIP), transcript variant 1, mRNA [NM_004536]	ACCACTTATATTGCTAGCTACATTAAGAATTTCTGAATATGTTACTGAGCTTGCTTGTGG	4671	NLR family, apoptosis inhibitory protein	NM_004536	6.05758	5.84846	8.09362	7.65454	1.15599	1.35575
A_23_P110492	16	MARCH6	Homo sapiens membrane-associated ring finger (C3HC4) 6, E3 ubiquitin protein ligase (MARCH6), transcript variant 1, mRNA [NM_005885]	TAAAGAGCAATGTGTTCTGGCTGTTTTATACTTCAACAATTTTTTCCCTAAGTGGTAAGC	10299	membrane-associated ring finger (C3HC4) 6, E3 ubiquitin protein ligase	NM_005885	10.0713	10.4747	11.339	11.3377	0.756074	1.00088
A_23_P110504	16	CLPTM1L	Homo sapiens CLPTM1-like (CLPTM1L), mRNA [NM_030782]	CTGCCGCCAGCCAAGTGCAACTTGAATTGTCAATGAGTATTTTTGGAAGCATTTGGAGGA	81037	CLPTM1-like	NM_030782	11.3326	10.8019	12.0487	11.117	1.44472	1.90755
A_23_P110569	8	TRIM36	Homo sapiens tripartite motif containing 36 (TRIM36), transcript variant 1, mRNA [NM_018700]	AAGTAGCAAATATCATGGAGAACTTCAGTGTTTAGCAGGCTGTTAATTTCCCATCTATGA	55521	tripartite motif containing 36	NM_018700	4.67158	3.06145	5.02197	1.95985	3.0528	8.35203
A_23_P110571	16	MAST4	Homo sapiens microtubule associated serine/threonine kinase family member 4 (MAST4), transcript variant 3, mRNA [NM_001164664]	AAGGACTTTGTGGTACGGCAGAGGCGGGGGAAAGAGAGTTTGCGTAGCAGCCCTCACAAA	375449	microtubule associated serine/threonine kinase family member 4	NM_001164664	5.32966	5.199	6.64393	7.66425	1.09479	0.493009
A_23_P110606	16	MAML1	Homo sapiens mastermind-like 1 (Drosophila) (MAML1), mRNA [NM_014757]	CCTTTCCCATGTACTCAGTTTAGCTCTCAAAGAAGGGGTGAATCATAAAGCCAGTGAAAA	9794	mastermind-like 1 (Drosophila)	NM_014757	7.26435	7.06556	8.83876	8.18789	1.14773	1.57011
A_23_P110624	12	CTNND2	Homo sapiens catenin (cadherin-associated protein), delta 2 (CTNND2), transcript variant 1, mRNA [NM_001332]	TCTAGGCTTCAGGTTGCATTGGGGTTCCTCTGTACAGCAAGATGTTTCTTGCCTTTTGTT	1501	catenin (cadherin-associated protein), delta 2	NM_001332	1.77274	3.53119	13.4959	13.4265	0.295565	1.04927
A_23_P110643	16	CDKL3	Homo sapiens cyclin-dependent kinase-like 3 (CDKL3), transcript variant 2, mRNA [NM_016508]	TGGCTTGAAAGAAAATCCACATTGCGGAGGTTCTGTGACAATGCCACCCATCAATCTAAC	51265	cyclin-dependent kinase-like 3	NM_016508	8.33094	8.44411	9.20296	8.8328	0.924555	1.2925
A_23_P110661	16	SKIV2L2	Homo sapiens superkiller viralicidic activity 2-like 2 (S. cerevisiae) (SKIV2L2), mRNA [NM_015360]	CACCTGTTTGATTACAGTTGACTACAAATGCCTGCAAGTGTGGATTTGGTTCTCCCATAC	23517	superkiller viralicidic activity 2-like 2 (S. cerevisiae)	NM_015360	12.4535	12.2639	12.6576	12.5997	1.14043	1.04092
A_23_P11070	2	GPR174	Homo sapiens G protein-coupled receptor 174 (GPR174), mRNA [NM_032553]	CAGTCCGTTGTTATGATGACCATTGGCGAGTTGATTGGGTTTGTAACTCCGCTTCTGATT	84636	G protein-coupled receptor 174	NM_032553	2.66436	4.89329	1.76339	2.92975	0.213317	0.445544
A_23_P110712	16	DUSP1	Homo sapiens dual specificity phosphatase 1 (DUSP1), mRNA [NM_004417]	TGTCTACTCCTAGAAGAACCAAATACCTCAATTTTTGTTTTTGAGTACTGTACTATCCTG	1843	dual specificity phosphatase 1	NM_004417	7.03773	7.77882	10.4797	10.5972	0.598289	0.921771
A_23_P110791	2	CSF1R	Homo sapiens colony stimulating factor 1 receptor (CSF1R), transcript variant 1, mRNA [NM_005211]	ATCCTAACTAACAGTCACGCCGTGGGATGTCTCTGTCCACATTAAACTAACAGCATTAAT	1436	colony stimulating factor 1 receptor	NM_005211	4.31122	4.50489	1.84675	2.63187	0.874376	0.580306
A_23_P110802	16	CENPH	Homo sapiens centromere protein H (CENPH), mRNA [NM_022909]	TTTACATTTCTGGCAATCTCAACTCTTATTTGGAATACTTCTGTGCATTTGTCTGTCCAC	64946	centromere protein H	NM_022909	10.8321	10.6489	10.1087	9.37187	1.1354	1.66648
A_23_P110811	16	COX7C	Homo sapiens cytochrome c oxidase subunit VIIc (COX7C), mRNA [NM_001867]	AGCCTCTGGAAGTGGATCAAACTAGAACTCATATGCCATACTAGATATGTTTGTCAATAA	1350	cytochrome c oxidase subunit VIIc	NM_001867	16.5138	16.4933	16.6008	16.7244	1.01428	0.917881
A_23_P110846	16	CNOT8	Homo sapiens CCR4-NOT transcription complex, subunit 8 (CNOT8), transcript variant 1, mRNA [NM_004779]	TCAGATTTTTGGGTCATGTCTGTTGTATTTTCAGTAATGTGATTTCAGATGGTCATCTGG	9337	CCR4-NOT transcription complex, subunit 8	NM_004779	10.6601	10.5129	9.62175	9.60405	1.10743	1.01234
A_23_P110851	16	TERT	Homo sapiens telomerase reverse transcriptase (TERT), transcript variant 1, mRNA [NM_198253]	TGGGGGTCCCTGTGGGTCAAATTGGGGGGAGGTGCTGTGGGAGTAAAAAACTGAATATAT	7015	telomerase reverse transcriptase	NM_198253	6.31521	6.63917	5.61451	5.57518	0.798874	1.02764
A_23_P110879	16	TRAF3IP2	Homo sapiens TRAF3 interacting protein 2 (TRAF3IP2), transcript variant 2, mRNA [NM_147686]	GTTGGTAAATGGCTTCCAAACTGCAATTGACATATTTGAGGATAGAATCCGAGGCATTGA	10758	TRAF3 interacting protein 2	NM_147686	8.79919	9.24199	8.86787	9.24264	0.735705	0.771227
A_23_P110882	16	TSPYL4	Homo sapiens TSPY-like 4 (TSPYL4), mRNA [NM_021648]	ATTTCTCTGTCAAACTCAATGATCATTTAGTACTTTTGTCTTCTCCCATGTGCTTGAAGG	23270	TSPY-like 4	NM_021648	9.17532	8.76779	11.5573	9.81639	1.32641	3.34236
A_23_P110941	16	GSTA4	Homo sapiens glutathione S-transferase alpha 4 (GSTA4), mRNA [NM_001512]	ATCCCAGCTCTGTCATGGTGCTATCTATGTATTAAGTTGGGTCCTAAGTTGGGTCTTTTG	2941	glutathione S-transferase alpha 4	NM_001512	7.95152	5.98368	9.21409	9.26031	3.91183	0.968472
A_23_P110961	16	MPC1	Homo sapiens mitochondrial pyruvate carrier 1 (MPC1), transcript variant 1, mRNA [NM_016098]	TTGTCCCCACTGTTTAAAAATGTTACCTGTGTATTTCCATGCAGTGTATATATTGAGATG	51660	mitochondrial pyruvate carrier 1	NM_016098	10.4893	10.5246	11.0217	12.2923	0.9758	0.41448
A_23_P111000	16	PSMB9	Homo sapiens proteasome (prosome, macropain) subunit, beta type, 9 (PSMB9), mRNA [NM_002800]	ACCATCATGGCAGTGGAGTTTGACGGGGGCGTTGTGATGGGTTCTGATTCCCGAGTGTCT	5698	proteasome (prosome, macropain) subunit, beta type, 9	NM_002800	10.2921	11.093	10.1462	11.4273	0.574015	0.411472
A_23_P111005	16	YIPF3	Homo sapiens Yip1 domain family, member 3 (YIPF3), mRNA [NM_015388]	TTAAAGGACAGTCCTGATGACATGTTTCGTAGATGGGGTTTGCAGCTGCCACTGAGCTGT	25844	Yip1 domain family, member 3	NM_015388	11.3686	11.2465	12.3697	12.4397	1.08831	0.952639
A_23_P111037	16	HIST1H3A	Homo sapiens histone cluster 1, H3a (HIST1H3A), mRNA [NM_003529]	ATCAGAAGTCCACTGAACTGCTTATTCGTAAACTACCTTTCCAGCGCCTGGTGCGCGAGA	8350	histone cluster 1, H3a	NM_003529	13.1889	13.1068	12.7002	12.5501	1.05855	1.10964
A_23_P111041	16	HIST1H2BI	Homo sapiens histone cluster 1, H2bi (HIST1H2BI), mRNA [NM_003525]	AAGGCTATGGGGATTATGAACTCCTTCGTCAACGACATTTTCGAGCGCATTGCAGGCGAG	8346	histone cluster 1, H2bi	NM_003525	9.65683	9.82032	11.3955	10.3537	0.892863	2.05883
A_23_P111054	16	HIST1H2BB	Homo sapiens histone cluster 1, H2bb (HIST1H2BB), mRNA [NM_021062]	GGCTAAGCATGCTGTGTCCGAGGGCACTAAGGCAGTTACCAAGTACACTAGCTCTAAATA	3018	histone cluster 1, H2bb	NM_021062	8.21802	8.62896	10.518	9.57732	0.752132	1.91938
A_23_P111092	16	OR2H1	Homo sapiens olfactory receptor, family 2, subfamily H, member 1 (OR2H1), mRNA [NM_030883]	CATCCACCCTCCACTTGCCCTTCTGTCCCCACCAGCAGATAGATGACTTTTTATGTGAGG	26716	olfactory receptor, family 2, subfamily H, member 1	NM_030883	10.9808	10.8261	10.9959	11.1906	1.11321	0.873743
A_23_P111112	16	VARS2	Homo sapiens valyl-tRNA synthetase 2, mitochondrial (VARS2), transcript variant 2, mRNA [NM_020442]	TCATTGTGTAAATGAGGACACAGACTGGCTTGGTCGCAGTGACTGTGGTGTCCTTGAGAT	57176	valyl-tRNA synthetase 2, mitochondrial	NM_020442	12.2072	12.0558	11.6848	11.1993	1.11064	1.40011
A_23_P111132	3	HSPA1A	Homo sapiens heat shock 70kDa protein 1A (HSPA1A), mRNA [NM_005345]	GAGCTTCAAGACTTTGCATTTCCTAGTATTTCTGTTTGTCAGTTCTCAATTTCCTGTGTT	3303	heat shock 70kDa protein 1A	NM_005345	1.88127	1.90389	5.77895	1.89632	0.98444	14.7498
A_23_P111141	16	BAG6	Homo sapiens BCL2-associated athanogene 6 (BAG6), transcript variant 1, mRNA [NM_004639]	AGTCCCCCCAGAATGGGTCCCTATTATCCAGCAGGACATTCAGAGCCAGCGGAAGGTGAA	7917	BCL2-associated athanogene 6	NM_004639	11.415	11.5082	12.4387	12.7144	0.937474	0.826074
A_23_P111188	16	ZBTB22	Homo sapiens zinc finger and BTB domain containing 22 (ZBTB22), transcript variant 1, mRNA [NM_005453]	CCCGGGTGATCTCCCACCACACTTACTGTCTTCCTTTATCTCTGTGGACTTGTATATATT	9278	zinc finger and BTB domain containing 22	NM_005453	6.11747	5.26186	5.12962	5.50416	1.80952	0.771349
A_23_P111194	8	SPDEF	Homo sapiens SAM pointed domain containing ETS transcription factor (SPDEF), transcript variant 1, mRNA [NM_012391]	CCGCCATGAACTACGACAAGCTGAGCCGCTCCATCCGCCAGTATTACAAGAAGGGCATCA	25803	SAM pointed domain containing ETS transcription factor	NM_012391	4.36654	4.47008	4.65379	4.05815	0.930747	1.51114
A_23_P111228	16	COQ3	Homo sapiens coenzyme Q3 methyltransferase (COQ3), mRNA [NM_017421]	AACATGTGATTGATCTAGAAACATTTTTACAGTGCTGCTGTCAAGTGTTAAAACCCGGTG	51805	coenzyme Q3 methyltransferase	NM_017421	6.76492	5.8545	7.98886	7.72235	1.87959	1.20289
A_23_P111240	4	PHACTR2	Homo sapiens phosphatase and actin regulator 2 (PHACTR2), transcript variant 3, mRNA [NM_014721]	TACCACCTTGCATTTCATTGTTCTTCACAAGTGCTTTGTGCCCCTTTAATTAAAAACACA	9749	phosphatase and actin regulator 2	NM_014721	3.32737	3.57402	3.28496	4.04695	0.842852	0.589679
A_23_P111273	16	TBC1D7	Homo sapiens TBC1 domain family, member 7 (TBC1D7), transcript variant 1, mRNA [NM_016495]	TTCAAGAGGTGCTTTGCGGGATGTTTGCCTGAATCCAGTTTACAGAGGGTTTGGGATAAA	51256	TBC1 domain family, member 7	NM_016495	8.32665	8.6532	8.72051	8.71125	0.797445	1.00644
A_23_P111288	16	TMEM14C	Homo sapiens transmembrane protein 14C (TMEM14C), transcript variant 2, mRNA [NM_016462]	GTATCTGTAGGTAAATCTCAAGGGTAAAATGTTAGGTGTCAGCTTTCAGGGCTCTGAAAC	51522	transmembrane protein 14C	NM_016462	12.4632	12.4971	13.0236	12.5675	0.97675	1.37178
A_23_P111297	16	RPP40	Homo sapiens ribonuclease P/MRP 40kDa subunit (RPP40), transcript variant 1, mRNA [NM_006638]	TGAGCCAAGCACAGTGGTGGCAAAAGCTTATTTGTGTACAATCACTGGCTTCATACTTCC	10799	ribonuclease P/MRP 40kDa subunit	NM_006638	9.35423	8.65101	8.20655	7.75655	1.62814	1.36604
A_23_P111303	16	SCAF8	Homo sapiens SR-related CTD-associated factor 8 (SCAF8), transcript variant 4, mRNA [NM_014892]	ATAGATATATTTCAGAATAGCAAGTGGTGGTATATCTTATCCATATCTTTAGGCTGCTGC	22828	SR-related CTD-associated factor 8	NM_014892	10.581	10.4536	9.68168	10.8132	1.09229	0.456447
A_23_P111343	16	BCLAF1	Homo sapiens BCL2-associated transcription factor 1 (BCLAF1), transcript variant 1, mRNA [NM_014739]	CAAAAGAGGAAGAGGTCGTGGTACTTTTCAACGTGGCAGAGGGCGCTTTAACTTCAAAAA	9774	BCL2-associated transcription factor 1	NM_014739	11.2665	11.3692	11.7396	12.3852	0.931277	0.639204
A_23_P111361	9	PPIL6	Homo sapiens peptidylprolyl isomerase (cyclophilin)-like 6 (PPIL6), transcript variant 1, mRNA [NM_173672]	AGAATTAGTTCCAACACAGAATGAAAGACCAATACATATGTGTAGAATTACTGACAGTGG	285755	peptidylprolyl isomerase (cyclophilin)-like 6	NM_173672	5.06758	3.74367	4.44238	3.89249	2.50344	1.46397
A_23_P111381	16	ATG5	Homo sapiens autophagy related 5 (ATG5), transcript variant 1, mRNA [NM_004849]	CAGTAAACCCATCTTTCCTTAACGAAAATTTCCTATGTTTACAGTCTGTCTATTGGTATG	9474	autophagy related 5	NM_004849	9.76941	9.85658	10.3685	10.3303	0.941369	1.02685
A_23_P111452	16	AGAP3	Homo sapiens ArfGAP with GTPase domain, ankyrin repeat and PH domain 3 (AGAP3), transcript variant 1, mRNA [NM_031946]	GTAAACTTTGTACATTGGAATATTTATGTTTGTGTACATATTTGATGTGTGTGTGTATGA	116988	ArfGAP with GTPase domain, ankyrin repeat and PH domain 3	NM_031946	8.51858	9.58345	11.5901	11.4367	0.478016	1.11221
A_23_P111481	16	SRRT	Homo sapiens serrate, RNA effector molecule (SRRT), transcript variant 1, mRNA [NM_015908]	GTCCTATGAAGCTCTGAGAATTTTTTGTACGATCAGCCTTACTGCTAATAAAAGCACTTC	51593	serrate, RNA effector molecule	NM_015908	12.4435	12.4589	12.7319	12.2975	0.989393	1.35138
A_23_P111487	16	SRRT	Homo sapiens serrate, RNA effector molecule (SRRT), transcript variant 4, mRNA [NM_001128853]	GAGGAAGTGAAAAAGGAAGTCGCGTTTTTTAACAACTTCCTCACTGATGCTAAGCGCCCA	51593	serrate, RNA effector molecule	NM_001128853	7.35764	7.43517	7.58524	7.42997	0.947679	1.11363
A_23_P111492	16	MOSPD3	Homo sapiens motile sperm domain containing 3 (MOSPD3), transcript variant 1, mRNA [NM_023948]	ATTCCCAGCCACTATGATGTCCAGGACCGCTTCCGCATTGAGCTGTCTGAGGAAGGAGCT	64598	motile sperm domain containing 3	NM_023948	7.26138	6.8206	7.20982	6.94723	1.35734	1.19963
A_23_P11160	16	MAP7D3	Homo sapiens MAP7 domain containing 3 (MAP7D3), transcript variant 1, mRNA [NM_024597]	CTGTAAAGCCCCATCTTGGAACAGTCAGCACCTTTCATGCTCTTGTCAGTGTTTCCTTTT	79649	MAP7 domain containing 3	NM_024597	7.84159	7.58438	7.19114	6.57593	1.19516	1.53179
A_23_P111621	15	GTF2IRD1	Homo sapiens GTF2I repeat domain containing 1 (GTF2IRD1), transcript variant 2, mRNA [NM_005685]	TCGGATATGTATCGATGCCTTTTAGTTTTTCCAATGATTTTTACACTATATTCCTGCCAC	9569	GTF2I repeat domain containing 1	NM_005685	11.1665	11.246	10.0558	10.7176	0.946336	0.63208
A_23_P111635	16	STYXL1	Homo sapiens serine/threonine/tyrosine interacting-like 1 (STYXL1), mRNA [NM_016086]	AAGATGATGATGATGATTCAGACTCTGATGGTGATGGCAAAGATCTTGTGCCTCAAGCAG	51657	serine/threonine/tyrosine interacting-like 1	NM_016086	9.38354	9.36751	9.06114	9.35358	1.01117	0.816517
A_23_P111657	2	SHH	Homo sapiens sonic hedgehog (SHH), mRNA [NM_000193]	CGCGGGCGCCTACGCGCCGCTCACGGCCCAGGGCACCATTCTCATCAACCGGGTGCTGGC	6469	sonic hedgehog	NM_000193	2.38601	1.91507	3.05689	3.87	1.38601	0.569157
A_23_P111672	16	TES	Homo sapiens testis derived transcript (3 LIM domains) (TES), transcript variant 2, mRNA [NM_152829]	TTTTTTAATGTACCCTACCTTCAGTATTCTCTTTGTAAGTTGGTGACTTGCATCTGTGGC	26136	testis derived transcript (3 LIM domains)	NM_152829	5.75471	6.65065	9.90965	9.96576	0.537395	0.961849
A_23_P111724	2	RUNDC3B	Homo sapiens RUN domain containing 3B (RUNDC3B), transcript variant 1, mRNA [NM_138290]	TGAAATTTTATATTGTTCTGGTACATGTCTGAAATTCTATTGCTTGGAGAGAATCCCCTC	154661	RUN domain containing 3B	NM_138290	1.99494	1.9822	1.97603	2.07464	1.00887	0.933935
A_23_P111737	2	RAMP3	Homo sapiens receptor (G protein-coupled) activity modifying protein 3 (RAMP3), mRNA [NM_005856]	GCTGAGGCTCAGGCTATCCGCCCAAGCTCTTTGCTCATTCTAGGGCCAGTGGAGGAAAAT	10268	receptor (G protein-coupled) activity modifying protein 3	NM_005856	1.90508	1.87255	1.88869	4.41844	1.02281	0.173169
A_23_P111753	16	MRPL32	Homo sapiens mitochondrial ribosomal protein L32 (MRPL32), mRNA [NM_031903]	ATCATTGAACGAGACAGAAAGCGACCATCCTGGTTCACCCAGAATTGACACCAAAGATGT	64983	mitochondrial ribosomal protein L32	NM_031903	13.7786	13.7675	12.9181	13.102	1.00777	0.880271
A_23_P111804	14	PARP12	Homo sapiens poly (ADP-ribose) polymerase family, member 12 (PARP12), transcript variant 1, mRNA [NM_022750]	TGATTCGGTTTCTCAGAGTCTCATGGCATCATAGTTTTTCCAGAATGACACAGTAGCCAC	64761	poly (ADP-ribose) polymerase family, member 12	NM_022750	3.07456	3.51318	7.49426	7.77029	0.737839	0.825862
A_23_P111811	16	ING3	Homo sapiens inhibitor of growth family, member 3 (ING3), transcript variant 1, mRNA [NM_019071]	TCAACAGGTATATTCTGCTGCATGTACTGTACTCCAGAGCTGTTATGTAACACTGTATAT	54556	inhibitor of growth family, member 3	NM_019071	12.03	12.0989	10.9725	11.0404	0.953405	0.95406
A_23_P111843	16	ZNHIT1	Homo sapiens zinc finger, HIT-type containing 1 (ZNHIT1), mRNA [NM_006349]	AGGGAGGAGCCGCTCATTCACCCAACAAAACTGTGTCTTATCTGCCAGGAAAGACCAGCC	10467	zinc finger, HIT-type containing 1	NM_006349	14.3939	14.1722	14.238	14.4468	1.16616	0.865254
A_23_P111860	1	RADIL	Homo sapiens Ras association and DIL domains (RADIL), mRNA [NM_018059]	TAGGTTCTATTTATATGGCAGATGACGTGAAATTGTGATGTTTGTTACAGAGCTTTTATG	55698	Ras association and DIL domains	NM_018059	1.73442	1.73299	1.73624	1.77025	1.00099	0.976706
A_23_P111865	16	ZSCAN21	Homo sapiens zinc finger and SCAN domain containing 21 (ZSCAN21), mRNA [NM_145914]	TCAGACCTTCTTAAACATCAGAGAATGCACACAGAAGAGGCGCCATATCAGTGCAAAGAT	7589	zinc finger and SCAN domain containing 21	NM_145914	7.6099	7.32106	7.9143	7.96303	1.22166	0.966787
A_23_P111919	9	PURG	Homo sapiens purine-rich element binding protein G (PURG), transcript variant A, mRNA [NM_013357]	ACTGCTCCAGACTATTGAAGTATGCAAATCAGCACAAAATGTGACATTCTGACATTCTAA	29942	purine-rich element binding protein G	NM_013357	7.44969	7.55808	3.31623	5.94689	0.927623	0.16147
A_23_P111929	16	OTUD6B	Homo sapiens OTU domain containing 6B (OTUD6B), transcript variant 1, mRNA [NM_016023]	TATTGGCAGCTAGACAGTTAGAAATTAAACAGATTCCATCTGATGGCCACTGTATGTATA	51633	OTU domain containing 6B	NM_016023	5.81637	5.662	7.14067	6.3173	1.11293	1.76954
A_23_P111947	3	CDH17	Homo sapiens cadherin 17, LI cadherin (liver-intestine) (CDH17), transcript variant 1, mRNA [NM_004063]	ATAATGTTGAAAGTGCTCAAGCATCTGAAGTCAAACCTCTGAGAAGCTGAATTTGAAAAG	1015	cadherin 17, LI cadherin (liver-intestine)	NM_004063	1.84184	1.83553	4.36056	4.66684	1.00438	0.808726
A_23_P111961	16	MAK16	Homo sapiens MAK16 homolog (S. cerevisiae) (MAK16), mRNA [NM_032509]	AGAGCCCTGAATCCTTTAACTTTAATGCCATCTTAGGCCTGGAAGTTAGAGTGAGGGAAA	84549	MAK16 homolog (S. cerevisiae)	NM_032509	11.0729	11.0318	9.73607	9.59384	1.0289	1.10361
A_23_P111978	4	KCNK9	Homo sapiens potassium channel, two pore domain subfamily K, member 9 (KCNK9), transcript variant 1, mRNA [NM_001282534]	GCGCAACACTGACGTGTCTATGGAGAACATGGTGACTGTGGGCTTCTTCTCCTGCATGGG	51305	potassium channel, two pore domain subfamily K, member 9	NM_001282534	2.06026	4.87294	3.2309	4.23651	0.142331	0.49806
A_23_P111995	16	LOXL2	Homo sapiens lysyl oxidase-like 2 (LOXL2), mRNA [NM_002318]	TGACTCATCTTCCTGTTGTTCCAATTCTGTGGGTTTTTGATTCAACGGTGCTATAACCAG	4017	lysyl oxidase-like 2	NM_002318	12.7606	11.9995	8.66673	7.93583	1.69484	1.65968
A_23_P112004	3	LRRC6	Homo sapiens leucine rich repeat containing 6 (LRRC6), transcript variant 1, mRNA [NM_012472]	ACACCCAGAAGACGACCTGAACCCAAAATTATACCAAGTGAGGAAGACCCAACCTTTGAA	23639	leucine rich repeat containing 6	NM_012472	2.90363	6.97895	2.13386	1.93773	0.0593208	1.14562
A_23_P11201	1	GPR34	Homo sapiens G protein-coupled receptor 34 (GPR34), transcript variant 4, mRNA [NM_001097579]	AGTAGGAGTGAAAGCACTTCAGAATTTAAACCAGGATACTCCCTGCATGATACATCTGTG	2857	G protein-coupled receptor 34	NM_001097579	1.89126	1.88159	1.86588	2.75089	1.00672	0.54148
A_23_P112026	9	IDO1	Homo sapiens indoleamine 2,3-dioxygenase 1 (IDO1), mRNA [NM_002164]	ATCTGCAAATCGTGACTAAGTACATCCTGATTCCTGCAAGCCAGCAGCCAAAGGAGAATA	3620	indoleamine 2,3-dioxygenase 1	NM_002164	5.46631	5.31768	4.2296	3.77248	1.10852	1.3728
A_23_P112061	16	HGSNAT	Homo sapiens heparan-alpha-glucosaminide N-acetyltransferase (HGSNAT), mRNA [NM_152419]	TTCTGTATTCCTCATGGTGCCAAACACAGTGCCTTCTACATTGCAGGCGCTGAATAAACA	138050	heparan-alpha-glucosaminide N-acetyltransferase	NM_152419	12.5479	12.609	9.32493	9.19836	0.958567	1.09169
A_23_P112103	13	GSDMD	Homo sapiens gasdermin D (GSDMD), transcript variant 1, mRNA [NM_024736]	AGAGGTGGAGACCATCTCCAAGGAACTGGAGCTTTTGGACAGAGAGCTGTGCCAGCTGCT	79792	gasdermin D	NM_024736	4.10395	5.04544	4.7777	5.63669	0.520694	0.551339
A_23_P112113	16	KIAA0196	Homo sapiens KIAA0196 (KIAA0196), mRNA [NM_014846]	GTGCTGTAACTGTTTTTCCTACTTCTTCAATGGAAGGATTGTCCTTAGATCTTCCCACCA	9897	KIAA0196	NM_014846	9.61319	9.56852	12.6099	12.2686	1.03145	1.26689
A_23_P112135	16	TRAM1	Homo sapiens translocation associated membrane protein 1 (TRAM1), mRNA [NM_014294]	GTTCTTTTCAGTGTTCACATCTTGTTCCCCATTTCTCACTTGTGTCACCAGCTGTTTGTG	23471	translocation associated membrane protein 1	NM_014294	11.8971	11.9094	11.7256	11.361	0.991483	1.28752
A_23_P11214	16	NKRF	Homo sapiens NFKB repressing factor (NKRF), transcript variant 2, mRNA [NM_017544]	GAAGCTTGAACTGTTTGTTCTTGGTGCCTTGCAGAGAGACTCACAGCAACTCTCCATTAT	55922	NFKB repressing factor	NM_017544	10.4989	10.633	10.1689	10.1872	0.911254	0.987436
A_23_P112159	16	AGO2	Homo sapiens argonaute RISC catalytic component 2 (AGO2), transcript variant 1, mRNA [NM_012154]	TTCCAGAATGCCTTCCGTCCCAGATTTCAAACTTGGATTTTGAACTGCAGACCTGTATGA	27161	argonaute RISC catalytic component 2	NM_012154	9.73688	10.3398	9.42662	9.66257	0.658422	0.849126
A_23_P112162	16	DGAT1	Homo sapiens diacylglycerol O-acyltransferase 1 (DGAT1), mRNA [NM_012079]	GGACAGCCAATAGCCGTCCTCATGTACGTCCACGACTACTACGTGCTCAACTATGAGGCC	8694	diacylglycerol O-acyltransferase 1	NM_012079	9.43132	9.89967	9.21437	9.25085	0.722791	0.975025
A_23_P112187	16	FIBCD1	Homo sapiens fibrinogen C domain containing 1 (FIBCD1), transcript variant 1, mRNA [NM_032843]	AGGGCTGGGATGAGGCTTGTACAACCCCCACCACCAATTTCCCAGGGACTCCAGGGTCCT	84929	fibrinogen C domain containing 1	NM_032843	5.09632	5.1912	4.99012	5.29769	0.93635	0.808005
A_23_P112201	16	KDM4C	Homo sapiens lysine (K)-specific demethylase 4C (KDM4C), transcript variant 1, mRNA [NM_015061]	TGGGAACTGAGTTGTTGGCCTTTGTGAAATGAAATTTTTGGCTCTTGAGAAAGAATTCTT	23081	lysine (K)-specific demethylase 4C	NM_015061	10.7885	10.6041	10.3706	10.2744	1.1363	1.06899
A_23_P11224	16	MMGT1	Homo sapiens membrane magnesium transporter 1 (MMGT1), mRNA [NM_173470]	GCTTCTCAGTGGCTTGACAGCATCTTCCTGGTTGTATGTGGCCTGTTTACATGATGTATT	93380	membrane magnesium transporter 1	NM_173470	11.0465	11.202	11.2451	11.4296	0.897835	0.879922
A_23_P112241	16	DNAJB5	Homo sapiens DnaJ (Hsp40) homolog, subfamily B, member 5 (DNAJB5), transcript variant 3, mRNA [NM_012266]	GCTGGGGGAAGACTGCTTCAGCCAGATCCTGGGGTGGGGTCTTTAGGTTTTCTCACTTTG	25822	DnaJ (Hsp40) homolog, subfamily B, member 5	NM_012266	8.52522	8.47345	8.39786	8.22496	1.03654	1.12732
A_23_P112251	16	GNG10	Homo sapiens guanine nucleotide binding protein (G protein), gamma 10 (GNG10), transcript variant 1, mRNA [NM_001017998]	AGAATTCTTAACTTCACAAGTGTTTTACTTCGACGATGTGCCTTTGATTTAATTTGGGAC	2790	guanine nucleotide binding protein (G protein), gamma 10	NM_001017998	13.1596	12.1094	13.5905	11.9251	2.07088	3.17193
A_23_P112260	16	GNG10	Homo sapiens guanine nucleotide binding protein (G protein), gamma 10 (GNG10), transcript variant 1, mRNA [NM_001017998]	CTAGATCCTGTGCTTTACTCTGAAGACTCTAGGAGAGAAGTTTGCTGAGGAATGCCTTCA	2790	guanine nucleotide binding protein (G protein), gamma 10	NM_001017998	10.9157	9.54951	11.0396	9.86899	2.57797	2.25104
A_23_P112289	4	TMOD1	Homo sapiens tropomodulin 1 (TMOD1), transcript variant 1, mRNA [NM_003275]	GGGCAAATGGCTTATGTGAGGTAAGACACTAGAGGGATAAATTTCCAGATCAACATGGCT	7111	tropomodulin 1	NM_003275	1.90578	3.57496	4.42488	3.38053	0.314432	2.06244
A_23_P112296	1	DBH	Homo sapiens dopamine beta-hydroxylase (dopamine beta-monooxygenase) (DBH), mRNA [NM_000787]	ATTCCTGAGTAAACAGATATTTTCGCCCACCTAAAGGGAAGCCCTGACAACAACTATCAC	1621	dopamine beta-hydroxylase (dopamine beta-monooxygenase)	NM_000787	1.9196	1.92011	4.00913	1.90447	0.999647	4.30095
A_23_P112311	16	TRIM32	Homo sapiens tripartite motif containing 32 (TRIM32), transcript variant 1, mRNA [NM_012210]	AGACATCATATTCCCGTAACATTATGTCTCAGTCTGATCGTCTTTACCAGTATGAAAGTC	22954	tripartite motif containing 32	NM_012210	8.94444	9.17275	9.74143	9.89466	0.853632	0.899234
A_23_P112341	16	RMI1	Homo sapiens RecQ mediated genome instability 1 (RMI1), mRNA [NM_024945]	AAAGAGGGACTGTTTACCATTCTTCCACTGTGCTGTTATAAAGTTGTATTTGAAAGGTAA	80010	RecQ mediated genome instability 1	NM_024945	9.26953	9.16353	9.76822	9.29554	1.07624	1.38768
A_23_P11237	16	TAF1	Homo sapiens TAF1 RNA polymerase II, TATA box binding protein (TBP)-associated factor, 250kDa (TAF1), transcript variant 1, mRNA [NM_004606]	GCATGCTTCAGGAGAACACAAGGATGGACATGGAAAATGAAGAAAGCATGATGTCCTATG	6872	TAF1 RNA polymerase II, TATA box binding protein (TBP)-associated factor, 250kDa	NM_004606	7.30646	7.35627	7.53378	7.78414	0.966067	0.840683
A_23_P112397	16	FBXW5	Homo sapiens F-box and WD repeat domain containing 5 (FBXW5), mRNA [NM_018998]	GGCTTTTTCCCGAGCGGGAGAGGTGGAGATGCTTATAGCAGTTACGCCTTAGGAAGGGGA	54461	F-box and WD repeat domain containing 5	NM_018998	9.59027	9.83422	10.2658	11.0069	0.844435	0.598299
A_23_P112406	16	GTF3C5	Homo sapiens general transcription factor IIIC, polypeptide 5, 63kDa (GTF3C5), transcript variant 2, mRNA [NM_012087]	AGCTGACCCTAGCACTGGCTGTGACATGCTGCTTGGTGCTGCCTCTGGTCCTGAGGGGTT	9328	general transcription factor IIIC, polypeptide 5, 63kDa	NM_012087	10.9871	11.2585	11.82	11.8746	0.828485	0.962856
A_23_P112412	16	TEX10	Homo sapiens testis expressed 10 (TEX10), transcript variant 1, mRNA [NM_017746]	GTGTTCAGGAACAGTGGCTCACAGACTTACATTACTGCTTTAACGTGTATATCACTGGGC	54881	testis expressed 10	NM_017746	11.9062	11.6567	12.1063	11.8025	1.18883	1.23431
A_23_P112429	16	RPL35	Homo sapiens ribosomal protein L35 (RPL35), mRNA [NM_007209]	CTCTCTAAGATCCGAGTCGTCCGGAAATCCATTGCCCGTGTTCTCACAGTTATTAACCAG	11224	ribosomal protein L35	NM_007209	18.0039	17.9064	17.9445	17.8979	1.06988	1.03282
A_23_P112478	16	NUDT2	Homo sapiens nudix (nucleoside diphosphate linked moiety X)-type motif 2 (NUDT2), transcript variant 1, mRNA [NM_001161]	AGGCATAGAAGCAGGCCAGCTGACCATTATTGAGGGGTTCAAAAGGGAACTCAATTATGT	318	nudix (nucleoside diphosphate linked moiety X)-type motif 2	NM_001161	9.25653	9.52541	9.34981	9.70815	0.829964	0.780061
A_23_P112482	8	AQP3	Homo sapiens aquaporin 3 (Gill blood group) (AQP3), mRNA [NM_004925]	AATTTGGGTCAATACATCCTTTTGTCTCCCAAGGGAAGAGAATGGGCAGCAGGTATGTGT	360	aquaporin 3 (Gill blood group)	NM_004925	4.90349	3.80517	3.29359	1.98562	2.14105	2.47592
A_23_P112512	16	SLC25A51	Homo sapiens solute carrier family 25, member 51 (SLC25A51), transcript variant 1, mRNA [NM_033412]	TGGCTGGAACGGGACAGAAAACTGATAAATCTTTTCAGAGGTGCCCATCTGAATTACCAT	92014	solute carrier family 25, member 51	NM_033412	8.21625	8.27976	7.97339	8.09193	0.956936	0.921118
A_23_P112531	16	FAM102A	Homo sapiens family with sequence similarity 102, member A (FAM102A), transcript variant 1, mRNA [NM_001035254]	AGTATATCAGAGATATTTTTGGAAAGGAGTTGGTCTATGCAATGTCAGTTTGGAATCTTC	399665	family with sequence similarity 102, member A	NM_001035254	14.7414	15.4646	15.1709	15.8699	0.605752	0.615995
A_23_P112548	15	HDHD3	Homo sapiens haloacid dehalogenase-like hydrolase domain containing 3 (HDHD3), mRNA [NM_031219]	CCCACAAGGCCTGGAAAGAGGTGATTGTTAGGTTGCGCAGAGGTGGTCTTATCCAGCTCA	81932	haloacid dehalogenase-like hydrolase domain containing 3	NM_031219	4.60545	4.82272	4.90599	5.72446	0.860193	0.567042
A_23_P112554	3	COL15A1	Homo sapiens collagen, type XV, alpha 1 (COL15A1), mRNA [NM_001855]	TCATATTTTAGTATGGTGTCTGTTTATGTAACTCTGACTTGCTGGAAAAGTTGAAACTCC	1306	collagen, type XV, alpha 1	NM_001855	1.82687	1.82402	1.8168	1.84418	1.00198	0.981202
A_23_P112596	16	ADK	Homo sapiens adenosine kinase (ADK), transcript variant 1, mRNA [NM_001123]	GATCAAGACCAGAAAGAAATTATTGATACCAATGGAGCTGGAGATGCATTTGTTGGAGGT	132	adenosine kinase	NM_001123	8.06806	6.79791	9.42256	9.95442	2.41186	0.691661
A_23_P11262	16	F8A1	Homo sapiens coagulation factor VIII-associated 1 (F8A1), mRNA [NM_012151]	CAAATTTCTCCTTCCACTCGTCCGCACGGTACGTCTTCATGGGAGTCATTTTATTCCTTA	8263	coagulation factor VIII-associated 1	NM_012151	8.73931	9.10102	10.8328	10.9326	0.778239	0.933126
A_23_P112634	16	SMIM14	Homo sapiens small integral membrane protein 14 (SMIM14), mRNA [NM_174921]	GGGGTTGTCTGGGATTGTGTGAAAGAAAATTAGAACCACGCTGTATTTACATTTACCTTG	201895	small integral membrane protein 14	NM_174921	13.7935	12.8325	8.57142	8.66568	1.94674	0.936756
A_23_P112652	16	CNOT10	Homo sapiens CCR4-NOT transcription complex, subunit 10 (CNOT10), transcript variant 1, mRNA [NM_015442]	ATTTACTGGCCATTTTAGTTGTATCACAGCAGAATGAATAAAAGATGGTGAAGGCTGTTA	25904	CCR4-NOT transcription complex, subunit 10	NM_015442	10.7594	10.7062	11.3192	11.1087	1.03755	1.15711
A_23_P112666	16	FOXE3	Homo sapiens forkhead box E3 (FOXE3), mRNA [NM_012186]	CCCTTTCACGTAGACACACCTGGCTGCCTTCTTCACGCCCTGAGGACACTTCTTGGAGAT	2301	forkhead box E3	NM_012186	5.42651	6.38045	7.56775	6.16274	0.516221	2.64818
A_23_P112774	16	PTP4A3	Homo sapiens protein tyrosine phosphatase type IVA, member 3 (PTP4A3), transcript variant 1, mRNA [NM_032611]	TCCCACACCAGCCAGGCTGGTCTCCTCTAGCCTGTTTGTTGTGGGGTGGGGGTATATTTT	11156	protein tyrosine phosphatase type IVA, member 3	NM_032611	9.10142	9.04853	7.67433	7.78616	1.03734	0.925409
A_23_P11279	16	ALG13	Homo sapiens ALG13, UDP-N-acetylglucosaminyltransferase subunit (ALG13), transcript variant 2, mRNA [NM_018466]	AGCACGCTTCCTGGGCTGTTACAGTCAATGGACTTATCAACACTGAAATGTTATCCTCCT	79868	ALG13, UDP-N-acetylglucosaminyltransferase subunit	NM_018466	8.51676	8.34656	9.90941	9.77128	1.12522	1.10048
A_23_P112801	16	CHP1	Homo sapiens calcineurin-like EF-hand protein 1 (CHP1), mRNA [NM_007236]	CCCCCTTTTGGCTGTATAGCAAAGTGTTTTAATCCACGGTTGTGCCTTATTGTTCCATTA	11261	calcineurin-like EF-hand protein 1	NM_007236	13.3052	13.5864	13.0336	13.0228	0.822862	1.00747
A_23_P112825	16	LCMT1	Homo sapiens leucine carboxyl methyltransferase 1 (LCMT1), transcript variant 1, mRNA [NM_016309]	GACATGATGGAGTTGTACAACAGGTTACCTCGAGCTGAAGTGAGCAGGATAGAATCACTT	51451	leucine carboxyl methyltransferase 1	NM_016309	10.7714	10.6308	11.334	11.3834	1.10238	0.966365
A_23_P112846	13	MTHFD2L	Homo sapiens methylenetetrahydrofolate dehydrogenase (NADP+ dependent) 2-like (MTHFD2L), mRNA [NM_001144978]	TCACATGGTGAATGACTACTAAGAGTAATGATTATATCACATTGTGAATGACTACTTGCC	441024	methylenetetrahydrofolate dehydrogenase (NADP+ dependent) 2-like	NM_001144978	3.7965	2.91609	5.25741	4.7718	1.8409	1.40018
A_23_P11286	16	HNRNPH2	Homo sapiens heterogeneous nuclear ribonucleoprotein H2 (H') (HNRNPH2), transcript variant 1, mRNA [NM_019597]	CAAGTTAGTTATGTTGTAGGAGTGTACCTAAGCAGTAAGCGTATTTAGGTTAATGCAGTT	3188	heterogeneous nuclear ribonucleoprotein H2 (H')	NM_019597	10.2474	9.95658	10.4224	10.5445	1.2233	0.918854
A_23_P11295	16	CMC4	Homo sapiens C-x(9)-C motif containing 4 (CMC4), mRNA [NM_001018024]	TGCGTAAGTGTTGTGCTCAGTATCCCAAGGGAAGATCTGTCGTCTGTTCAGGATTTGAAA	100272147	C-x(9)-C motif containing 4	NM_001018024	10.8102	10.6387	11.7581	11.2989	1.12626	1.3748
A_23_P112950	16	ATF7IP	Homo sapiens activating transcription factor 7 interacting protein (ATF7IP), transcript variant 2, mRNA [NM_018179]	TTTTGGGCCTTTCTGTGATCCTCAGTCAACAGATGTGATCTCTTCTACCCAGAGCAGTTA	55729	activating transcription factor 7 interacting protein	NM_018179	10.2527	10.518	11.2418	11.414	0.832074	0.887502
A_23_P113005	12	EFNA1	Homo sapiens ephrin-A1 (EFNA1), transcript variant 1, mRNA [NM_004428]	ATGGAGAAAGAAGTGGAGACAGTCCTTTCCCACCATTCCTGCCTTTAAGCCAAAGAAACA	1942	ephrin-A1	NM_004428	4.49131	4.08539	4.43688	4.21261	1.32494	1.16819
A_23_P113111	4	AR	Homo sapiens androgen receptor (AR), transcript variant 1, mRNA [NM_000044]	AGCCACACAAACGTTTACTTATCTTATGCCACGGGAAGTTTAGAGAGCTAAGATTATCTG	367	androgen receptor	NM_000044	2.14107	1.63276	1.61985	1.62613	1.42239	0.995656
A_23_P113161	10	C1orf21	Homo sapiens chromosome 1 open reading frame 21 (C1orf21), mRNA [NM_030806]	TGATTTGACCACCAAGATGTAATGATGATTCTATTCCATTTTGAAAAGGGTCTGAGAAAG	81563	chromosome 1 open reading frame 21	NM_030806	1.81877	1.81315	6.43989	3.72389	1.00391	6.5705
A_23_P113184	16	FTO	Homo sapiens fat mass and obesity associated (FTO), mRNA [NM_001080432]	TTGGGGCATGACCCAGCCTATGGTTTGCCATACTCCCTCTTTTTCTCCGTTTTTTCATTA	79068	fat mass and obesity associated	NM_001080432	10.4424	10.289	10.9134	10.812	1.11219	1.07285
A_23_P113237	3	CRLF2	Homo sapiens cytokine receptor-like factor 2 (CRLF2), transcript variant 2, mRNA [NM_001012288]	TCCTCTATGAGGTTCAGTACCGGAGCCCCTTCGACACCGAGTGGCAGTCCAAACAGGAAA	64109	cytokine receptor-like factor 2	NM_001012288	6.11681	4.05181	3.90931	3.7202	4.18433	1.14006
A_23_P113283	16	ZMAT3	Homo sapiens zinc finger, matrin-type 3 (ZMAT3), transcript variant 1, mRNA [NM_022470]	ATTGAATTCTTTTTAGATCTAAGTAAAAATAGGTCAGCAGAGATTTCAGTTTCCCAGGGC	64393	zinc finger, matrin-type 3	NM_022470	7.20759	7.22212	6.93047	6.60867	0.989981	1.24989
A_23_P11331	12	TCEAL8	Homo sapiens transcription elongation factor A (SII)-like 8 (TCEAL8), transcript variant 1, mRNA [NM_153333]	AATAATTTGCAACCAGCTTATGAGGGCAATGGGGGCACCTAAACTCTTGATGAAAGAACT	90843	transcription elongation factor A (SII)-like 8	NM_153333	2.00383	1.99037	10.0918	2.78052	1.00937	158.819
A_23_P113317	16	P4HTM	Homo sapiens prolyl 4-hydroxylase, transmembrane (endoplasmic reticulum) (P4HTM), transcript variant 3, mRNA [NM_177938]	GGGCGAGACTGTTTTCCCTGTAGCAGATAACAGAACCTACGATGAAATGAGTCTGATTCA	54681	prolyl 4-hydroxylase, transmembrane (endoplasmic reticulum)	NM_177938	9.44438	10.078	9.90042	10.2387	0.644578	0.790956
A_23_P113393	1	APLN	Homo sapiens apelin (APLN), mRNA [NM_017413]	GCAGGATCGCTACTAAAAATTGTTTTGTATCCTTGGTGGGTGTCTTCTGCTATTTTATCT	8862	apelin	NM_017413	3.15299	4.45415	1.91194	3.11341	0.4058	0.434834
A_23_P113417	16	C17orf70	Homo sapiens chromosome 17 open reading frame 70 (C17orf70), transcript variant 2, mRNA [NM_025161]	TTCTGGGGTTTGGACTTGGGGTGAGTTTGTAACTGTTGCTGCCACACCACCAGGAGCACC	80233	chromosome 17 open reading frame 70	NM_025161	8.8534	8.52263	8.75186	8.70555	1.25768	1.03262
A_23_P113462	1	KIF21A	Homo sapiens kinesin family member 21A (KIF21A), transcript variant 2, mRNA [NM_017641]	GGTTGTAAACTGAATGCTGTGATAATACTCTGTATTCTTTATGGAAATGTTGTCCTGTAC	55605	kinesin family member 21A	NM_017641	2.55496	2.48352	2.17669	2.41672	1.05077	0.846727
A_23_P113471	12	FAAH2	Homo sapiens fatty acid amide hydrolase 2 (FAAH2), mRNA [NM_174912]	CCAGCAGACAAGCAGAGAAACAACTGGGGAATTTATTGACTCATTTAGTTATTCTTTCTA	158584	fatty acid amide hydrolase 2	NM_174912	4.12545	2.40078	9.513	9.81736	3.30504	0.809803
A_23_P113523	16	GTPBP6	Homo sapiens GTP binding protein 6 (putative) (GTPBP6), mRNA [NM_012227]	ATCCACACAATTCCAGTGGGCCCTCGGTGCCTGCTGTGAACTGCTTTCCCTCGGAATGTT	8225	GTP binding protein 6 (putative)	NM_012227	13.0056	12.8331	12.6191	12.7302	1.127	0.925843
A_23_P11353	16	ATP6AP2	Homo sapiens ATPase, H+ transporting, lysosomal accessory protein 2 (ATP6AP2), mRNA [NM_005765]	AGAAGATTCGAATGGATTGAATGTTACCTGTGCCAGAATTAGAAAAGGGGGTTGGAAATT	10159	ATPase, H+ transporting, lysosomal accessory protein 2	NM_005765	10.4466	10.3984	10.9654	10.7209	1.03402	1.18466
A_23_P113572	16	CD19	Homo sapiens CD19 molecule (CD19), transcript variant 2, mRNA [NM_001770]	TACATGCCAGTGACACTTCCAGTCCCCTTTGTATTCCTTAAATAAACTCAATGAGCTCTT	930	CD19 molecule	NM_001770	13.9883	14.0944	14.3034	12.7916	0.929112	2.85151
A_23_P113613	3	CDCP1	Homo sapiens CUB domain containing protein 1 (CDCP1), transcript variant 1, mRNA [NM_022842]	CTTAATTTGTGGATGATACAGAAAGCCAGGCTTTGGGATACAAGTTCTTTCCTCTTCATT	64866	CUB domain containing protein 1	NM_022842	1.70086	1.69293	2.59531	4.36513	1.00551	0.293245
A_23_P113623	16	MRPL45	Homo sapiens mitochondrial ribosomal protein L45 (MRPL45), transcript variant 1, mRNA [NM_032351]	CCTTCAGATGGCAGAAGTGGAAGATGAGCCTACTTGTGAGCGATGTGACTTTAAGGAAAT	84311	mitochondrial ribosomal protein L45	NM_032351	12.0098	11.8173	12.882	12.8759	1.14273	1.00422
A_23_P113634	16	CBFB	Homo sapiens core-binding factor, beta subunit (CBFB), transcript variant 2, mRNA [NM_001755]	AAATGTTCCTGTTACCATCCTAATGTAAATACTGGATTTTTCTGTCATTTAGCACCATGC	865	core-binding factor, beta subunit	NM_001755	11.4952	11.9375	12.2678	12.0748	0.735968	1.14321
A_23_P113656	15	TUBB4A	Homo sapiens tubulin, beta 4A class IVa (TUBB4A), transcript variant 3, mRNA [NM_006087]	AACTTCTCTTTGATCTCTGAATCCCCTCTGACTCCAACTTCTCTTTCACCCTCTATGAGT	10382	tubulin, beta 4A class IVa	NM_006087	5.87984	5.74199	5.03911	4.44238	1.10026	1.51229
A_23_P11372	16	HPRT1	Homo sapiens hypoxanthine phosphoribosyltransferase 1 (HPRT1), mRNA [NM_000194]	AAAGTAAGAAGCAGTCAATTTTCACATCAAAGACAGCATCTAAGAAGTTTTGTTCTGTCC	3251	hypoxanthine phosphoribosyltransferase 1	NM_000194	13.181	12.7319	11.6956	11.5431	1.36516	1.11154
A_23_P113789	16	USP19	Homo sapiens ubiquitin specific peptidase 19 (USP19), transcript variant 4, mRNA [NM_006677]	CAAGCGCTTCTCCTTTCGTAGTTTTATCTGGCGTGACAAGATCAATGACTTGGTGGAGTT	10869	ubiquitin specific peptidase 19	NM_006677	5.91934	5.51014	6.84593	6.8282	1.32795	1.01236
A_23_P113793	2	ZBED2	Homo sapiens zinc finger, BED-type containing 2 (ZBED2), mRNA [NM_024508]	AGACCACCAGTATGAATAAAAGCTTGTTCTGTGTGACCCAGCAAGTGGAAGGACAAAGAA	79413	zinc finger, BED-type containing 2	NM_024508	6.25028	3.26122	1.65315	3.01408	7.93956	0.389331
A_23_P113803	16	KATNA1	Homo sapiens katanin p60 (ATPase containing) subunit A 1 (KATNA1), transcript variant 1, mRNA [NM_007044]	GCCTACAACTATGGAGGATTTCGAGATGGCTTTAAAAAAGGTTTCTAAGTCAGTGTCTGC	11104	katanin p60 (ATPase containing) subunit A 1	NM_007044	10.6876	10.9189	9.68284	10.7268	0.851857	0.48499
A_23_P113825	10	NACC2	Homo sapiens NACC family member 2, BEN and BTB (POZ) domain containing (NACC2), mRNA [NM_144653]	GCCACTTACCTACTGAACTGCTACTGTTGCCTGAGAAAAATGTGATTTTTATTCTGCTTG	138151	NACC family member 2, BEN and BTB (POZ) domain containing	NM_144653	5.38759	3.88135	5.43075	2.93781	2.84068	5.62923
A_23_P11390	16	VCY	Homo sapiens variable charge, Y-linked (VCY), mRNA [NM_004679]	ATCTACTCCCCTATCTCCCTGAGCAGCAACTAAGTTTAGGCCCAGCTGCCAGACCTCAGA	9084	variable charge, Y-linked	NM_004679	9.9854	9.36028	6.63599	7.3442	1.54234	0.612076
A_23_P113972	16	EXOC1	Homo sapiens exocyst complex component 1 (EXOC1), transcript variant 3, mRNA [NM_001024924]	CGTGGCACAGGGCATAAGGGAGGAGGAAGTAAGTTACCAACTTGCATTTAACAAACAAGA	55763	exocyst complex component 1	NM_001024924	8.81387	8.88134	8.63375	8.88647	0.954311	0.83931
A_23_P114057	11	SEMA4C	Homo sapiens sema domain, immunoglobulin domain (Ig), transmembrane domain (TM) and short cytoplasmic domain, (semaphorin) 4C (SEMA4C), mRNA [NM_017789]	CCTAGGAGGAGGGCTCCTAACAGTGTAACTTATTGTGTCCCCGCGTATTTATTTGTTGTA	54910	sema domain, immunoglobulin domain (Ig), transmembrane domain (TM) and short cytoplasmic domain, (semaphorin) 4C	NM_017789	4.77942	4.4531	4.77644	4.84579	1.25381	0.953072
A_23_P114061	1	TRPM3	Homo sapiens transient receptor potential cation channel, subfamily M, member 3 (TRPM3), transcript variant 9, mRNA [NM_001007471]	AGTTCTACCTAACGTCCCACATCCTTCTCATGCCAACACTTCTGTAATTGATCATTATAA	80036	transient receptor potential cation channel, subfamily M, member 3	NM_001007471	3.66505	2.73539	2.16081	1.97907	1.90482	1.13425
A_23_P11408	2	PRY2	Homo sapiens PTPN13-like, Y-linked 2 (PRY2), mRNA [NM_001002758]	ACCTCCTTCTCTTCTGGACATGTCCAGGAGTGGCCGTTGCTACAAGTCACCTGGTGCTAC	442862	PTPN13-like, Y-linked 2	NM_001002758	1.78895	1.76506	1.77658	1.76685	1.0167	1.00676
A_23_P114095	16	MBTPS2	Homo sapiens membrane-bound transcription factor peptidase, site 2 (MBTPS2), mRNA [NM_015884]	ACTCTGGATGGTTACAGCACGGTAATGTTTGCACTCATCTGACAGAATCCCTGAGTTACA	51360	membrane-bound transcription factor peptidase, site 2	NM_015884	7.15543	6.23386	7.36177	7.24024	1.89416	1.08789
A_23_P114144	16	CCDC22	Homo sapiens coiled-coil domain containing 22 (CCDC22), mRNA [NM_014008]	ACGTTTGCGGTGACTGATGAGCTTGTGTTCAAGGATGCCAAGAAGGACGATGCTGTTCGG	28952	coiled-coil domain containing 22	NM_014008	9.18046	9.22578	10.1879	10.6947	0.969074	0.703756
A_23_P114155	16	GPKOW	Homo sapiens G patch domain and KOW motifs (GPKOW), mRNA [NM_015698]	CCATATGAGAAAGTTGCCTTCAGAAGGTGGGAAGATCATTGTTCCATCCTCTACTTCTGG	27238	G patch domain and KOW motifs	NM_015698	9.89663	9.97571	10.7759	10.9912	0.946658	0.861328
A_23_P114164	16	UBQLN2	Homo sapiens ubiquilin 2 (UBQLN2), mRNA [NM_013444]	TACAGTGTAACATTGTGTCAACATTTGCAGATTGACTGTATATGACCTTAATCTTTGTGC	29978	ubiquilin 2	NM_013444	9.83619	10.2229	9.91848	10.0085	0.764846	0.939476
A_23_P114185	2	TSPAN7	Homo sapiens tetraspanin 7 (TSPAN7), mRNA [NM_004615]	TGTCCCGGTTCATCACGGCCAATCAGTATGAGATGGTGTAAGGAGAAGTCTTTCAAGAAT	7102	tetraspanin 7	NM_004615	1.90714	1.9117	2.81034	1.89788	0.996842	1.88224
A_23_P114210	11	POU3F4	Homo sapiens POU class 3 homeobox 4 (POU3F4), mRNA [NM_000307]	AGGTTCGAGGCCTTGCAGCTGAGCTTCAAAAATATGTGCAAGCTGAAGCCCCTGCTGAAC	5456	POU class 3 homeobox 4	NM_000307	5.89356	5.21117	4.88102	3.4915	1.60479	2.61992
A_23_P114221	16	RBBP7	Homo sapiens retinoblastoma binding protein 7 (RBBP7), transcript variant 2, mRNA [NM_002893]	AATGTAAGTGGGGTGGCTTATGGCTTCTTTATCCTCTGATTCTAGCACTTTCAAGTGAGC	5931	retinoblastoma binding protein 7	NM_002893	13.0852	12.9645	13.7326	13.7039	1.08733	1.02004
A_23_P114232	16	PRDX4	Homo sapiens peroxiredoxin 4 (PRDX4), mRNA [NM_006406]	ATCTTCCTGTGGGTAGATCAGTGGATGAGACACTACGTTTGGTTCAAGCATTCCAGTACA	10549	peroxiredoxin 4	NM_006406	13.0424	12.4155	12.9481	12.7517	1.54423	1.14585
A_23_P114282	16	MCTS1	Homo sapiens malignant T cell amplified sequence 1 (MCTS1), transcript variant 1, mRNA [NM_014060]	GGGCTGTGGCATATGAAGACATATAAATGAGCCTCAGAAGGAATGCACTTGGGCTAAATA	28985	malignant T cell amplified sequence 1	NM_014060	13.4006	13.585	13.4826	13.5081	0.880049	0.982537
A_23_P114299	8	CXCR3	Homo sapiens chemokine (C-X-C motif) receptor 3 (CXCR3), transcript variant 1, mRNA [NM_001504]	GTGACTGTGGCCATGGTCCCCAAGACCTCTATATTTGCTCTTTTATTTTTATGTCTAAAA	2833	chemokine (C-X-C motif) receptor 3	NM_001504	1.8685	1.8732	4.03429	3.76039	0.996746	1.20907
A_23_P114307	2	P2RY4	Homo sapiens pyrimidinergic receptor P2Y, G-protein coupled, 4 (P2RY4), mRNA [NM_002565]	TCGTGCCCAACCTGTTCTTTGTCACAACCAGCAACAAAGGGACCACCGTCCTGTGCCATG	5030	pyrimidinergic receptor P2Y, G-protein coupled, 4	NM_002565	2.0522	2.03483	3.12768	3.86387	1.01211	0.600323
A_23_P114314	1	CDX4	Homo sapiens caudal type homeobox 4 (CDX4), mRNA [NM_005193]	AGCCAAGGAGAGAAAGATGATCAAAAAGAAAATCTCCCAGTTTGAGAATAGTGGAGGCTC	1046	caudal type homeobox 4	NM_005193	1.97129	1.96031	2.67256	1.95746	1.00764	1.6416
A_23_P114349	1	XAGE3	Homo sapiens X antigen family, member 3 (XAGE3), transcript variant 2, mRNA [NM_130776]	GGGTGAATGTGGAAATGGTCCTGATGACCAGGGGAAGATTCTGCCAAAATCAGAACAATT	170626	X antigen family, member 3	NM_130776	1.62412	2.8203	1.78281	3.87822	0.43643	0.234001
A_23_P114353	7	NXF5	Homo sapiens nuclear RNA export factor 5 (NXF5), transcript variant 1, mRNA [NM_032946]	TTGTTCTGTGTATTTGCCCCACTCATGATCACCGTTTATTTTCATAATAAACAGTGACGT	55998	nuclear RNA export factor 5	NM_032946	1.97182	1.97455	4.66684	5.53662	0.998111	0.547228
A_23_P114405	16	MORF4L2	Homo sapiens mortality factor 4 like 2 (MORF4L2), transcript variant 2, mRNA [NM_012286]	TAAGCTCCTTTTCTCATTTCAAAGTTGCTACCAGTGTATGCAGTAATTAGAACAAAGAAG	9643	mortality factor 4 like 2	NM_012286	11.2032	11.0041	11.6202	11.216	1.14799	1.3234
A_23_P114414	11	LONRF3	Homo sapiens LON peptidase N-terminal domain and ring finger 3 (LONRF3), transcript variant 1, mRNA [NM_001031855]	CACCTTCCCCACTGCCGTCGGGGGGAGTCTTCTTGTAAATATATCTAATTGCAATAACAT	79836	LON peptidase N-terminal domain and ring finger 3	NM_001031855	4.74683	5.48476	4.57344	3.56575	0.599599	2.01069
A_23_P114423	1	RGN	Homo sapiens regucalcin (RGN), transcript variant 2, mRNA [NM_152869]	TAAGGCTTTCTGTAAAAGGTACTATAGAAGGGCGAAGAATCGTTCAACTGTCAATCAGCC	9104	regucalcin	NM_152869	2.14362	2.0961	2.0589	2.20992	1.03349	0.900619
A_23_P114445	16	MAGEE1	Homo sapiens melanoma antigen family E, 1 (MAGEE1), mRNA [NM_020932]	TTTGAGCCTCAGTTCTCATGTATTGGGGGGTGGGGGTGGGTACATATTGTATTTGGTATT	57692	melanoma antigen family E, 1	NM_020932	5.69013	5.33594	6.48981	6.01053	1.27826	1.39405
A_23_P114466	16	TBL1Y	Homo sapiens transducin (beta)-like 1, Y-linked (TBL1Y), transcript variant 1, mRNA [NM_033284]	TACAGTGTAGCTTTCAGCCCCGATGGAAAGTACTTGGCTAGTGGATCCTTTGACAAGTAT	90665	transducin (beta)-like 1, Y-linked	NM_033284	8.81249	9.55518	8.24404	7.84159	0.597621	1.32175
A_23_P1145	16	MTPAP	Homo sapiens mitochondrial poly(A) polymerase (MTPAP), mRNA [NM_018109]	GCTGCTACATTGTGTAAAGAACTGGGCTTAGCCTATCAAATGGTCTGTGGACTTACTTGG	55149	mitochondrial poly(A) polymerase	NM_018109	9.74117	9.53048	8.47779	8.17506	1.15724	1.23348
A_23_P11461	16	UBE2V1	Homo sapiens ubiquitin-conjugating enzyme E2 variant 1 (UBE2V1), transcript variant 4, mRNA [NM_001032288]	ATGGAGTAAATAGTTCTAATGGAGTGGTGGACCCAAGAGCCATATCAGTGCTAGCAAAAT	7335	ubiquitin-conjugating enzyme E2 variant 1	NM_001032288	12.3498	12.3335	12.5493	12.6174	1.01137	0.953891
A_23_P114626	2	SERPINC1	Homo sapiens serpin peptidase inhibitor, clade C (antithrombin), member 1 (SERPINC1), mRNA [NM_000488]	TCCTGGTTTTTATAAGAGAAGTTCCTCTGAACACTATTATCTTCATGGGCAGAGTAGCCA	462	serpin peptidase inhibitor, clade C (antithrombin), member 1	NM_000488	1.94531	1.89364	2.60214	1.91648	1.03646	1.60844
A_23_P114656	16	HDAC1	Homo sapiens histone deacetylase 1 (HDAC1), mRNA [NM_004964]	AACATCAGCCATTTTTAGATTGGTTCTGTTTTCGTACCTTCCCACTGGCCTCAAGTGAGC	3065	histone deacetylase 1	NM_004964	14.5564	14.3701	13.5945	13.8371	1.1378	0.845241
A_23_P114670	12	ARHGEF16	Homo sapiens Rho guanine nucleotide exchange factor (GEF) 16 (ARHGEF16), mRNA [NM_014448]	ACAGGAGGCACCAATAGCGATTATTGGGGGCAATGCGAGGTCTCCTCCTATGCCCTTCCT	27237	Rho guanine nucleotide exchange factor (GEF) 16	NM_014448	3.6709	4.40627	7.79973	6.1418	0.600662	3.15564
A_23_P114689	15	ASAP3	Homo sapiens ArfGAP with SH3 domain, ankyrin repeat and PH domain 3 (ASAP3), transcript variant 1, mRNA [NM_017707]	CAATGAGAAAGCAGATACACCTAAGCCATCATCAACCACTAACATCTCAACTTGCCAGTT	55616	ArfGAP with SH3 domain, ankyrin repeat and PH domain 3	NM_017707	8.56225	7.75879	5.13816	6.92218	1.74528	0.290375
A_23_P114740	1	CFH	Homo sapiens complement factor H (CFH), transcript variant 1, mRNA [NM_000186]	TTGGATTAATTTGTGAAAATGTAATTATAAGCTGAGACCGGTGGCTCTCTTCTTAAAAGC	3075	complement factor H	NM_000186	1.88629	1.89359	1.8808	1.88813	0.994957	0.994927
A_23_P114774	16	PMVK	Homo sapiens phosphomevalonate kinase (PMVK), mRNA [NM_006556]	CAGGAAACCTCTGGAGACCTCATTTTCTCCATGGGGAAGACAGCCATGCTCTTCAGGAGG	10654	phosphomevalonate kinase	NM_006556	9.70815	9.38354	10.2821	10.2825	1.25233	0.999762
A_23_P114808	16	MECR	Homo sapiens mitochondrial trans-2-enoyl-CoA reductase (MECR), transcript variant 2, mRNA [NM_001024732]	TAACCTATGGGGGGATGGCCAAGCAGCCCGTCGTAGCCTCTGTGAGCCTGCTCATTTTTA	51102	mitochondrial trans-2-enoyl-CoA reductase	NM_001024732	9.72581	9.38298	8.25988	8.68908	1.26824	0.742673
A_23_P114826	16	MRPS15	Homo sapiens mitochondrial ribosomal protein S15 (MRPS15), mRNA [NM_031280]	AATGAGCATTGACCAGAGGAAAAAGATGCTCAAAAACCTCCGTAACACCAACTATGATGT	64960	mitochondrial ribosomal protein S15	NM_031280	12.2259	12.1279	11.8959	11.8626	1.07034	1.02337
A_23_P114839	12	FHL3	Homo sapiens four and a half LIM domains 3 (FHL3), transcript variant 1, mRNA [NM_004468]	AGGGCAGCAGTTCACCTCCCGGGATGAAGATCCCTACTGTGTGGCCTGTTTTGGAGAACT	2275	four and a half LIM domains 3	NM_004468	1.9364	1.93285	6.90943	7.33177	1.00246	0.746212
A_23_P114903	12	HSPA6	Homo sapiens heat shock 70kDa protein 6 (HSP70B') (HSPA6), mRNA [NM_002155]	CAAAATGCAAGACAAGTGTCGGGAAGTCCTTGCCTGGCTGGAGCACAACCAGCTGGCAGA	3310	heat shock 70kDa protein 6 (HSP70B')	NM_002155	4.47557	4.66638	12.7467	8.51598	0.876116	18.7752
A_23_P114929	16	MPC2	Homo sapiens mitochondrial pyruvate carrier 2 (MPC2), transcript variant 2, mRNA [NM_015415]	AAATTGGAGTCTGTTTGCTGTTAATTTCTTTGTGGGGGCAGCAGGAGCCTCTCAGCTTTT	25874	mitochondrial pyruvate carrier 2	NM_015415	13.7617	13.4383	13.0714	13.6943	1.25125	0.649371
A_23_P114934	3	MAEL	Homo sapiens maelstrom spermatogenic transposon silencer (MAEL), transcript variant 1, mRNA [NM_032858]	CTTTCTCTTCCTTATCTTAATGATGGTACTCTTTTCAATTTCTGAAAACAGTAACAGGCC	84944	maelstrom spermatogenic transposon silencer	NM_032858	2.00034	1.62895	1.6124	4.9527	1.2936	0.0987344
A_23_P114947	16	RGS2	Homo sapiens regulator of G-protein signaling 2 (RGS2), mRNA [NM_002923]	TAGATCTGGGATTATGTGGCCTTAGGTAGCTGGTTGTACATCTTTCCCTAAATCGATCCA	5997	regulator of G-protein signaling 2	NM_002923	11.0573	10.872	14.2863	14.176	1.13707	1.07946
A_23_P114952	16	TMEM9	Homo sapiens transmembrane protein 9 (TMEM9), transcript variant 1, mRNA [NM_016456]	TGGCTATTTTGATTAGGGAAGAGGGATGTGGTCTCTGATCTCTGTTGTCTTCTTGGGTCT	252839	transmembrane protein 9	NM_016456	10.1252	9.67515	10.2491	10.7435	1.36605	0.709858
A_23_P114983	11	TRIM63	Homo sapiens tripartite motif containing 63, E3 ubiquitin protein ligase (TRIM63), mRNA [NM_032588]	ACGATGTGCTGTATTTCAGTGTCTATCCCAGACATACGGGGTGGTAACTGAGTTTGTGTT	84676	tripartite motif containing 63, E3 ubiquitin protein ligase	NM_032588	3.23348	5.17297	5.73601	5.8666	0.260708	0.913461
A_23_P115036	16	IPO13	Homo sapiens importin 13 (IPO13), mRNA [NM_014652]	TGTGGGGAAGTAGAGTCTGTGGGAAAGGTGGTACAGGAAGACGGTCGTATGCTGCTCATA	9670	importin 13	NM_014652	6.46779	6.56905	7.41396	7.24807	0.932213	1.12186
A_23_P115046	16	EIF2B3	Homo sapiens eukaryotic translation initiation factor 2B, subunit 3 gamma, 58kDa (EIF2B3), transcript variant 1, mRNA [NM_020365]	ATGAAGCCAGATATTGTGTGTATTCCTGATGATGCTGACATGGGAACTGCAGATTCTTTG	8891	eukaryotic translation initiation factor 2B, subunit 3 gamma, 58kDa	NM_020365	9.58193	9.45111	8.02554	8.04027	1.09492	0.989843
A_23_P115064	3	CRABP2	Homo sapiens cellular retinoic acid binding protein 2 (CRABP2), transcript variant 1, mRNA [NM_001878]	CCCTACACCAACAAAGAGGAATGGCTGCAAGAGCCCAGATCACCCATTCCGGGTTCACTC	1382	cellular retinoic acid binding protein 2	NM_001878	3.54078	4.42744	3.64826	3.18064	0.540864	1.38282
A_23_P11507	16	ZZZ3	Homo sapiens zinc finger, ZZ-type containing 3 (ZZZ3), mRNA [NM_015534]	TCATGTGATGTGTACAAACTATGGTGAAAAGTGCCAGTGGTAGTAACTGTGTAAAGTTTC	26009	zinc finger, ZZ-type containing 3	NM_015534	9.51829	9.37015	10.098	9.88611	1.10814	1.15819
A_23_P115091	13	RAB25	Homo sapiens RAB25, member RAS oncogene family (RAB25), mRNA [NM_020387]	GATGGCTGAAGGAGCTCTATGACCATGCTGAAGCCACGATCGTCGTCATGCTCGTGGGTA	57111	RAB25, member RAS oncogene family	NM_020387	3.93053	3.56382	11.9192	12.2135	1.28941	0.815472
A_23_P115105	16	SZRD1	Homo sapiens SUZ RNA binding domain containing 1 (SZRD1), transcript variant 1, mRNA [NM_001114600]	GGTACATTTCCTGTGTGCAATCAGTACCTTGAAGGCAGAACATTCTGAATAAAGTTGGAA	26099	SUZ RNA binding domain containing 1	NM_001114600	12.0803	12.5427	12.6174	12.8844	0.725787	0.831022
A_23_P115124	16	TRIM11	Homo sapiens tripartite motif containing 11 (TRIM11), mRNA [NM_145214]	TTTGCAGGCCCACGTTCTGACTTGAAGCTTTCGTGGGCATGTTGCCATTGGGTTTTGCCC	81559	tripartite motif containing 11	NM_145214	8.57355	8.60346	9.48451	9.32918	0.979484	1.11368
A_23_P115137	16	LAMTOR5	Homo sapiens late endosomal/lysosomal adaptor, MAPK and MTOR activator 5 (LAMTOR5), mRNA [NM_006402]	AGTGCACAAAATGGCCTCTTGATGCTCATATCTGTTCTTCAGCAGCCTGTCATAGGAACT	10542	late endosomal/lysosomal adaptor, MAPK and MTOR activator 5	NM_006402	14.5757	14.6577	13.7186	14.1072	0.944753	0.763892
A_23_P115149	16	WDR77	Homo sapiens WD repeat domain 77 (WDR77), mRNA [NM_024102]	GCATCCCTGGGTTCTTGGAAGCAGCTCTTATGCTACTCATAGAGATGGGATTGACTTTAT	79084	WD repeat domain 77	NM_024102	10.2032	9.79869	9.62904	8.81193	1.32365	1.76186
A_23_P115167	16	LRRC8B	Homo sapiens leucine rich repeat containing 8 family, member B (LRRC8B), transcript variant 1, mRNA [NM_015350]	GCTGCAGTGTTTACTTTTGGGGAAAAATAGCTTGATGAATTTGTCCCCTCATGTGGGTGA	23507	leucine rich repeat containing 8 family, member B	NM_015350	8.93426	8.79022	7.59147	6.07881	1.105	2.85337
A_23_P115190	14	NGF	Homo sapiens nerve growth factor (beta polypeptide) (NGF), mRNA [NM_002506]	TCAGAGAGCAATGTCCCTGCAGGACACACCATCCCCCAAGTCCACTGGACTAAACTTCAG	4803	nerve growth factor (beta polypeptide)	NM_002506	5.66415	4.37031	4.73149	4.96134	2.45179	0.852726
A_23_P115200	6	FCRL4	Homo sapiens Fc receptor-like 4 (FCRL4), mRNA [NM_031282]	AGGCTGCGCTTCCAAAAGCAAATGATAATTATGTTAATGTCATTAGTGACAAAGATTTGC	83417	Fc receptor-like 4	NM_031282	1.91564	1.90344	3.32915	3.05477	1.00849	1.20948
A_23_P115215	16	VPS72	Homo sapiens vacuolar protein sorting 72 homolog (S. cerevisiae) (VPS72), transcript variant 2, mRNA [NM_005997]	CCCCGAGCCTTGCGCCAGAAAATTGTCATTAAATGAAGAGATGTCTAGTCCTCAGAAACT	6944	vacuolar protein sorting 72 homolog (S. cerevisiae)	NM_005997	10.8549	11.2834	11.5762	11.9362	0.743079	0.77914
A_23_P115223	16	HAX1	Homo sapiens HCLS1 associated protein X-1 (HAX1), transcript variant 1, mRNA [NM_006118]	TATTCCTGGGACGTTGGTTCCGGTCCCGGTAGCCTTGTTAACCCTCAGAGGCCTTCAAGT	10456	HCLS1 associated protein X-1	NM_006118	12.7458	13.2224	13.0548	13.2056	0.718703	0.900739
A_23_P115246	16	FCN3	Homo sapiens ficolin (collagen/fibrinogen domain containing) 3 (FCN3), transcript variant 1, mRNA [NM_003665]	ATTGTCCACGGTGCCTGGTGGTATGCATCCTGTTACCGATCAAATCTCAATGGTCGCTAT	8547	ficolin (collagen/fibrinogen domain containing) 3	NM_003665	4.80185	5.34008	5.16067	4.85339	0.688617	1.23737
A_23_P115316	16	TOR3A	Homo sapiens torsin family 3, member A (TOR3A), mRNA [NM_022371]	CTTATTATGACACTCCAGATGGTCTCCTTAGCATCTCAGCTCTTCTGCAAGGAAGAGCTT	64222	torsin family 3, member A	NM_022371	11.3818	10.3952	10.491	10.7985	1.9815	0.808017
A_23_P115331	16	AHDC1	Homo sapiens AT hook, DNA binding motif, containing 1 (AHDC1), mRNA [NM_001029882]	ACCCATCTCCTCCACGCAGAAGCCGAAGGTGAGCCCTTTCTGCACAAAACCAGCAATTGG	27245	AT hook, DNA binding motif, containing 1	NM_001029882	9.39672	10.3086	10.4733	11.1136	0.531476	0.641568
A_23_P115346	16	EIF2D	Homo sapiens eukaryotic translation initiation factor 2D (EIF2D), transcript variant 1, mRNA [NM_006893]	ATCCCATCCTATGTGACTGCATCTTAGAGAAAAATGAACAGCATACAGTCATGAAGCTTC	1939	eukaryotic translation initiation factor 2D	NM_006893	10.5309	10.4304	10.2599	10.3841	1.07212	0.917501
A_23_P115356	16	AKR7A2	Homo sapiens aldo-keto reductase family 7, member A2 (aflatoxin aldehyde reductase) (AKR7A2), mRNA [NM_003689]	CTTGGCCTTAAGCTGACTTAGAAGGGTTTTTCTGAATTGTCTAGATCCATGCATTATTTT	8574	aldo-keto reductase family 7, member A2 (aflatoxin aldehyde reductase)	NM_003689	13.3237	13.1121	12.569	12.5049	1.15799	1.04548
A_23_P115366	16	CMPK1	Homo sapiens cytidine monophosphate (UMP-CMP) kinase 1, cytosolic (CMPK1), transcript variant 1, mRNA [NM_016308]	TGGCCACTAAAATTCATATTGAGATTATCTTGGTTTCTTGGAAGAGATAGGAATGAGTTC	51727	cytidine monophosphate (UMP-CMP) kinase 1, cytosolic	NM_016308	10.1055	10.3505	9.78512	9.61023	0.843834	1.12888
A_23_P115375	16	HIST2H3D	Homo sapiens histone cluster 2, H3d (HIST2H3D), mRNA [NM_001123375]	TGGTGGGGCTGTTCGAAGACACGAACCTGTGCGCCATCCATGCCAAGCGCGTGACCATCA	653604	histone cluster 2, H3d	NM_001123375	13.2501	13.1155	14.7295	14.6937	1.09775	1.02512
A_23_P115407	13	GSTM1	Homo sapiens glutathione S-transferase mu 1 (GSTM1), transcript variant 2, mRNA [NM_146421]	GCCCTACTTGATTGATGGGGCTCACAAGATCACCCAGAGCAACGCCATCTTGTGCTACAT	2944	glutathione S-transferase mu 1	NM_146421	2.71089	3.42882	6.97314	8.59081	0.607972	0.32586
A_23_P11543	16	FUCA1	Homo sapiens fucosidase, alpha-L- 1, tissue (FUCA1), mRNA [NM_000147]	TTCTCTGATAACCTACTTGCTTACTCAATGCCTTTAAGCCAAGTCACCCTGTTGCCTATG	2517	fucosidase, alpha-L- 1, tissue	NM_000147	10.3046	10.4237	9.37983	10.1458	0.920748	0.588077
A_23_P115444	1	TNFSF18	Homo sapiens tumor necrosis factor (ligand) superfamily, member 18 (TNFSF18), mRNA [NM_005092]	ACTCTAACAAACAAATCTAAAATCCAAAATGTAGGAGGGACTTATGAATTGCATGTTGGG	8995	tumor necrosis factor (ligand) superfamily, member 18	NM_005092	1.6859	1.67832	1.66068	2.11778	1.00527	0.728453
A_23_P115467	16	S100A5	Homo sapiens S100 calcium binding protein A5 (S100A5), mRNA [NM_002962]	GGCCCTGACCACTATGGTGACCACGTTTCACAAATATTCGGGGAGAGAGGGTAGCAAACT	6276	S100 calcium binding protein A5	NM_002962	7.82122	7.44545	7.13253	7.54187	1.29753	0.752968
A_23_P115482	16	UBE2T	Homo sapiens ubiquitin-conjugating enzyme E2T (UBE2T), mRNA [NM_014176]	TAGGGGACTTGTCCTGGTTCATCTTAGTTAATGTGTTCTTTGCCAAGGTGATCTAAGTTG	29089	ubiquitin-conjugating enzyme E2T	NM_014176	12.6308	12.7986	12.8525	12.4435	0.890246	1.32777
A_23_P115492	16	VASH2	Homo sapiens vasohibin 2 (VASH2), transcript variant 1, mRNA [NM_024749]	AGTCAACAGATGTTATTTCAGTCTCAGTGCATCTCCTCTGGCTTTCTTTGACTGAAGGTG	79805	vasohibin 2	NM_024749	7.06117	6.78969	5.81154	5.41957	1.20705	1.31219
A_23_P115519	2	LCE3D	Homo sapiens late cornified envelope 3D (LCE3D), mRNA [NM_032563]	GAGCTAGGGGTTTTCCTGTGGAAGGTCTGAGCTCTCCCCAGAAGGCACTTCCTGTCTGAT	84648	late cornified envelope 3D	NM_032563	1.97916	1.96773	2.68331	1.96505	1.00796	1.6452
A_23_P115573	16	SHISA4	Homo sapiens shisa family member 4 (SHISA4), transcript variant 1, mRNA [NM_198149]	CCTCCTCTCTGGCTGCCCCACTGGCCACATCTCTGGCCTGCTAGATTAAAGCTGTAAAGA	149345	shisa family member 4	NM_198149	10.9493	10.9612	10.5356	10.5246	0.991796	1.00761
A_23_P115597	16	ANKRD26	Homo sapiens ankyrin repeat domain 26 (ANKRD26), transcript variant 1, mRNA [NM_014915]	AACACCAAACTTCTTGTGGAAAAACAGCAGAGCAGATCTTTGTTCACCACTCTCACTACC	22852	ankyrin repeat domain 26	NM_014915	7.98488	7.80755	6.84136	6.78478	1.13079	1.04
A_23_P115608	11	ARHGAP21	Homo sapiens Rho GTPase activating protein 21 (ARHGAP21), mRNA [NM_020824]	TCGGATAGTTGTATACAAATGAGCAAGGTATTTGTTGCAACTTACTACATAGCATATACC	57584	Rho GTPase activating protein 21	NM_020824	4.22896	4.03188	4.73917	1.88636	1.14638	7.22408
A_23_P115636	15	TRDMT1	Homo sapiens tRNA aspartic acid methyltransferase 1 (TRDMT1), mRNA [NM_004412]	AAGGGACAGGGTCTGTGTTACAGACTGCAGAGGATGTGCAGGTTGAGAATATCTACAAAT	1787	tRNA aspartic acid methyltransferase 1	NM_004412	6.83925	6.57103	5.22941	5.28175	1.20432	0.964371
A_23_P115645	3	CELF2	Homo sapiens CUGBP, Elav-like family member 2 (CELF2), transcript variant 1, mRNA [NM_001025076]	GTTCATGCCTTTTGGAAATGTTATCTCTGCTAAAGTCTTCATTGACAAACAGACCAATCT	10659	CUGBP, Elav-like family member 2	NM_001025076	3.95809	5.91359	1.87502	1.90096	0.257832	0.982176
A_23_P115683	16	HPS6	Homo sapiens Hermansky-Pudlak syndrome 6 (HPS6), mRNA [NM_024747]	CAGGGAAGGGTGCCTGGGACTTGGAGGGTCCCATGTATGGACCTGTGTATGCAATACTGT	79803	Hermansky-Pudlak syndrome 6	NM_024747	12.5279	12.1566	12.7168	12.6976	1.29346	1.01339
A_23_P115703	16	PCGF6	Homo sapiens polycomb group ring finger 6 (PCGF6), transcript variant 1, mRNA [NM_001011663]	GATCTGTGCCATAAAATTTCAGTGTAATAAGACTTCTTCAATACATCTTCCAATAAGGGG	84108	polycomb group ring finger 6	NM_001011663	8.38739	7.72305	8.96861	8.3442	1.58484	1.54158
A_23_P115726	2	SLC16A9	Homo sapiens solute carrier family 16, member 9 (SLC16A9), mRNA [NM_194298]	GGGATTTTATAAACCAATAGCCAAGTGTTCTTTAAATAGGAGGCACCCTTCCCATTGTGC	220963	solute carrier family 16, member 9	NM_194298	3.95846	2.72129	3.37115	2.63067	2.35735	1.67074
A_23_P115743	16	FAM204A	Homo sapiens family with sequence similarity 204, member A (FAM204A), transcript variant 1, mRNA [NM_022063]	CTTCTGTCGTTGTCAGAGGTTTCCTACCTGTCTGATATAAACTTTCTCTGGGTTGATAAT	63877	family with sequence similarity 204, member A	NM_022063	9.03104	9.11694	8.57097	8.45026	0.9422	1.08727
A_23_P115762	16	ECD	Homo sapiens ecdysoneless homolog (Drosophila) (ECD), transcript variant 1, mRNA [NM_007265]	CACCGATCACAGACCAACAAGTAAGCCAACAAAAAATTAACCAGCACATTTAGCTTCTCT	11319	ecdysoneless homolog (Drosophila)	NM_007265	9.92334	10.0512	10.6797	10.8035	0.915214	0.917807
A_23_P115792	14	PLEKHA1	Homo sapiens pleckstrin homology domain containing, family A (phosphoinositide binding specific) member 1 (PLEKHA1), transcript variant 2, mRNA [NM_001001974]	AGCCAAAGATGATAAAGGGGGAAATGGTTTTTAGTGCGTATATTATACTGCCTCTTAGGT	59338	pleckstrin homology domain containing, family A (phosphoinositide binding specific) member 1	NM_001001974	1.75567	6.13133	10.7714	11.1627	0.0481721	0.762441
A_23_P115824	16	HNRNPH3	Homo sapiens heterogeneous nuclear ribonucleoprotein H3 (2H9) (HNRNPH3), transcript variant 2H9, mRNA [NM_012207]	TGTCATAGTCAATAAAAACAATCCTGCAGTTGGGTTTTGTATCTGATCCCTGCTTGGAGT	3189	heterogeneous nuclear ribonucleoprotein H3 (2H9)	NM_012207	12.6984	12.8642	12.4589	11.5945	0.891456	1.82056
A_23_P115838	16	C10orf12	Homo sapiens chromosome 10 open reading frame 12 (C10orf12), mRNA [NM_015652]	ACTTGCAGAGTCCTTCTCTGAGGCTAAGGGAAGTTATATATTATATTCTGGTTGTTCCTT	26148	chromosome 10 open reading frame 12	NM_015652	7.71099	8.19158	8.42016	9.42496	0.716689	0.498337
A_23_P115842	16	CCAR1	Homo sapiens cell division cycle and apoptosis regulator 1 (CCAR1), transcript variant 1, mRNA [NM_018237]	CCAAGGAGAATGGTGCCAGTGTATGATAAAATCCATGTAGTGATGAGGAATGGTGTTAAA	55749	cell division cycle and apoptosis regulator 1	NM_018237	10.2296	10.3223	10.9748	10.6387	0.937802	1.26232
A_23_P115861	16	ZNF485	Homo sapiens zinc finger protein 485 (ZNF485), mRNA [NM_145312]	TCATCCTTTGCTGGTCATCAGAAAACTCACAGTGGAAATAAACCGTATCAGTGTCGTGAC	220992	zinc finger protein 485	NM_145312	8.37873	7.56691	7.34561	7.09401	1.75543	1.19053
A_23_P115872	16	CEP55	Homo sapiens centrosomal protein 55kDa (CEP55), transcript variant 1, mRNA [NM_018131]	GTAAACCAAAAACTTTTAAATTTCTTCAGGTTTTCTAACATGCTTACCACTGGGCTACTG	55165	centrosomal protein 55kDa	NM_018131	9.71205	10.6809	9.60146	8.63014	0.510899	1.96063
A_23_P115885	14	MINPP1	Homo sapiens multiple inositol-polyphosphate phosphatase 1 (MINPP1), transcript variant 1, mRNA [NM_004897]	TGTACCTTATGCCTCGAACCTGATATTTGTGCTTTACCACTGTGAAAATGCTAAGACTCC	9562	multiple inositol-polyphosphate phosphatase 1	NM_004897	5.06922	2.1893	8.55932	8.22323	7.36108	1.26233
A_23_P115919	16	PHYH	Homo sapiens phytanoyl-CoA 2-hydroxylase (PHYH), transcript variant 2, mRNA [NM_001037537]	TTTCGAGCTCGACTTGTGAAAGGAGAAAGAACCAATCTTTGAAATAGCCATCTGCTATAA	5264	phytanoyl-CoA 2-hydroxylase	NM_001037537	6.18543	7.50438	7.21079	6.66173	0.400827	1.46314
A_23_P115922	16	EIF4EBP2	Homo sapiens eukaryotic translation initiation factor 4E binding protein 2 (EIF4EBP2), mRNA [NM_004096]	GTTGATGTCTCAGGAATAAGCTGGATCTCCAATGTTTTGGGGATGCTTTGAGTCTCAAAA	1979	eukaryotic translation initiation factor 4E binding protein 2	NM_004096	12.7735	12.7936	13.2023	12.8396	0.986151	1.28582
A_23_P115955	16	MRPL21	Homo sapiens mitochondrial ribosomal protein L21 (MRPL21), transcript variant 1, mRNA [NM_181515]	AAAGGAAAAACTTCAAGAAGAAAAGAATCGTCACGACCCCGCAGACTGTCCTCCGGATAA	219927	mitochondrial ribosomal protein L21	NM_181515	12.9347	12.6596	13.9289	13.8941	1.21011	1.02444
A_23_P11598	16	ZNF684	Homo sapiens zinc finger protein 684 (ZNF684), mRNA [NM_152373]	CAGTGTATCATATGTGGCAAAGCTTTTGGCAACACATCCGTGCTTGTTACACACCAAAGA	127396	zinc finger protein 684	NM_152373	6.37262	6.43016	6.56529	6.34903	0.960899	1.16172
A_23_P116037	16	TM7SF2	Homo sapiens transmembrane 7 superfamily member 2 (TM7SF2), transcript variant 1, mRNA [NM_003273]	ACGAGAGCTCAACCCTCGTATCTGTTTCTTCGACTTCAAATATTTCTGTGAACTGCGACC	7108	transmembrane 7 superfamily member 2	NM_003273	10.4375	10.319	10.2983	10.4295	1.08558	0.913087
A_23_P116091	16	DPP3	Homo sapiens dipeptidyl-peptidase 3 (DPP3), transcript variant 2, mRNA [NM_130443]	ACACGGTGCTGCTGCGTAAGGAATCTCGGAAGCTCATTGTTCAGCCCAACACTCGCCTTG	10072	dipeptidyl-peptidase 3	NM_130443	9.29213	8.98972	9.57303	9.84498	1.2332	0.828201
A_23_P116168	16	MSANTD4	Homo sapiens Myb/SANT-like DNA-binding domain containing 4 with coiled-coils (MSANTD4), mRNA [NM_032424]	AGAGAAGTGACACAGAGTAAATGGCTGATCTTCTATATTGTAGTATATTTTGTCCTTCCC	84437	Myb/SANT-like DNA-binding domain containing 4 with coiled-coils	NM_032424	9.46511	9.23967	10.556	10.157	1.16914	1.31865
A_23_P116207	16	IFT46	Homo sapiens intraflagellar transport 46 (IFT46), transcript variant 1, mRNA [NM_020153]	AGAGTACATTGACATGATCTGTGCCATTCTAGACATCCCTGTCTACAAGAGTCGGATCCA	56912	intraflagellar transport 46	NM_020153	8.14333	8.70743	7.63017	7.58524	0.676377	1.03163
A_23_P116235	16	MDK	Homo sapiens midkine (neurite growth-promoting factor 2) (MDK), transcript variant 1, mRNA [NM_001012334]	AAGGGATTCTGGGAAGCTTGAGCCTCCCCCAAAGCAATGTGAGTCCCAGAGCCCGCTTTT	4192	midkine (neurite growth-promoting factor 2)	NM_001012334	6.31371	6.51273	7.297	6.54335	0.871142	1.68605
A_23_P116264	15	NRGN	Homo sapiens neurogranin (protein kinase C substrate, RC3) (NRGN), transcript variant 1, mRNA [NM_006176]	GTTGTTTTGGTTTCGGACGACCCTTGCTCTGACCGGAAGAGAAGTCCCTATCCCACACCT	4900	neurogranin (protein kinase C substrate, RC3)	NM_006176	10.1304	9.27984	5.32138	4.58549	1.80322	1.66542
A_23_P116280	2	WT1	Homo sapiens Wilms tumor 1 (WT1), transcript variant D, mRNA [NM_024426]	CCTGGAGAAGCAGCTAACAATGTCTGGTTAGTTAAAAGCCCATTGCCATTTGGTCTGGAT	7490	Wilms tumor 1	NM_024426	5.19796	1.75408	1.90102	1.7234	10.8821	1.13102
A_23_P11629	5	TMEM61	Homo sapiens transmembrane protein 61 (TMEM61), mRNA [NM_182532]	AAGGCTCCTAGCAGGTCCTGAATCCAGAGACAAAAATGCTGTGCCTTCTCCAGAGTCTTA	199964	transmembrane protein 61	NM_182532	3.06929	4.22988	4.5366	4.36128	0.447331	1.12922
A_23_P116387	16	INCENP	Homo sapiens inner centromere protein antigens 135/155kDa (INCENP), transcript variant 1, mRNA [NM_001040694]	TTTAGTCTTTGGCATTTTAGCGTTTGGGAGGTAGATTAATAAAGTATATTCCTTCAAGCC	3619	inner centromere protein antigens 135/155kDa	NM_001040694	8.48571	9.35946	9.85562	9.48545	0.545726	1.29251
A_23_P116414	1	PLA2G16	Homo sapiens phospholipase A2, group XVI (PLA2G16), transcript variant 1, mRNA [NM_007069]	CATCAAGGGGGTCTTGTTTTGCTAGAGAGTTTGGGGTTTGGTTTGTGGATTTCATTGTGA	11145	phospholipase A2, group XVI	NM_007069	2.04731	2.55472	1.94732	2.44645	0.703487	0.707537
A_23_P116430	12	USH1C	Homo sapiens Usher syndrome 1C (autosomal recessive, severe) (USH1C), transcript variant 1, mRNA [NM_005709]	AGCTGCTGAGCGGCATGGTGGCATTGTGAAAGGGGACGAGATCATGGCAATCAACGGCAA	10083	Usher syndrome 1C (autosomal recessive, severe)	NM_005709	4.17991	3.54739	4.77236	4.67111	1.55027	1.07271
A_23_P11652	16	USP1	Homo sapiens ubiquitin specific peptidase 1 (USP1), transcript variant 1, mRNA [NM_003368]	TTGGGCATGGACTAATTTGTATCTGTTTAACTCATATTCTGCACGATCTGTATATAGTAC	7398	ubiquitin specific peptidase 1	NM_003368	10.331	10.368	11.1202	10.8305	0.974622	1.2224
A_23_P116557	14	LGALS9	Homo sapiens lectin, galactoside-binding, soluble, 9 (LGALS9), transcript variant 1, mRNA [NM_009587]	AGTGTGGATCTTGTGTGAAGCTCACTGCCTCAAGGTGGCCGTGGATGGTCAGCACCTGTT	3965	lectin, galactoside-binding, soluble, 9	NM_009587	3.04078	7.42091	6.7564	7.9352	0.0480231	0.441718
A_23_P116587	16	OMP	Homo sapiens olfactory marker protein (OMP), mRNA [NM_006189]	GGGGAGCGCCTGTCGGACCTGGCCAAGATCCGCAAGGTCATGTACTTCCTCGTCACCTTT	4975	olfactory marker protein	NM_006189	5.16962	5.54954	4.68273	5.65588	0.768478	0.509392
A_23_P116602	16	USP35	Homo sapiens ubiquitin specific peptidase 35 (USP35), mRNA [NM_020798]	TGCTGTAGCCCCCTTCTAACTTCTAACCGAAGACAAGACAGACACCCATGTTCTTAAATA	57558	ubiquitin specific peptidase 35	NM_020798	9.04853	8.77414	10.4352	10.0933	1.20948	1.2674
A_23_P116614	4	ME3	Homo sapiens malic enzyme 3, NADP(+)-dependent, mitochondrial (ME3), transcript variant 2, mRNA [NM_001014811]	CCCAAGGAAGCCATGAATGTTCAGACGGTCTGAGGCAGTCTCAGAGGCTAGTATGGGGCT	10873	malic enzyme 3, NADP(+)-dependent, mitochondrial	NM_001014811	2.27686	2.20748	3.77473	2.83816	1.04927	1.91397
A_23_P116624	5	SLC6A5	Homo sapiens solute carrier family 6 (neurotransmitter transporter), member 5 (SLC6A5), mRNA [NM_004211]	CAATTATGTTTGTGATAAAAATGCATCTGGCCCCTGGAAGATTTATTGAGAGGCTGAAGT	9152	solute carrier family 6 (neurotransmitter transporter), member 5	NM_004211	4.49457	4.25852	4.08131	4.23374	1.17777	0.899735
A_23_P11664	16	SRSF11	Homo sapiens serine/arginine-rich splicing factor 11 (SRSF11), transcript variant 1, mRNA [NM_004768]	GCCTCTGAGGGAGTCCAACTGTATACCTGCATCAGTGTCATTCCTTTGTGTGATTTCTTA	9295	serine/arginine-rich splicing factor 11	NM_004768	12.1128	11.9627	12.6492	12.4939	1.10969	1.11365
A_23_P116642	1	SLC26A10	Homo sapiens solute carrier family 26, member 10 (SLC26A10), mRNA [NM_133489]	GTAGGACTCCTGGACAGGGTGACTCCAGATCAGCTGTTTGTGAGTGTGCAGGATGCAGCT	65012	solute carrier family 26, member 10	NM_133489	4.81568	2.28721	2.14369	2.36112	5.76957	0.8601
A_23_P116694	16	RPS26	Homo sapiens ribosomal protein S26 (RPS26), mRNA [NM_001029]	ACCAAAGCCCATGTAAGGAGCTGAGTTCTTAAAGACTGAAGACAGGCTATTCTCTGGAGA	6231	ribosomal protein S26	NM_001029	18.1861	18.2498	18.129	18.1173	0.9568	1.0082
A_23_P116797	16	C12orf10	Homo sapiens chromosome 12 open reading frame 10 (C12orf10), mRNA [NM_021640]	TGGAAGGAGCATCTCTACCACCTGGAATCTGGGCTGTCCCCTCCAGTGGCCATCTTCTTT	60314	chromosome 12 open reading frame 10	NM_021640	11.7531	11.7832	10.9336	11.5002	0.979388	0.675213
A_23_P116829	16	UBE2N	Homo sapiens ubiquitin-conjugating enzyme E2N (UBE2N), mRNA [NM_003348]	CTGAAAATTTCATCTGTAACCTTTCATGTGTGTTAAGAAACACTGATCTGATCATTTGGG	7334	ubiquitin-conjugating enzyme E2N	NM_003348	10.7205	10.4997	8.7514	8.3808	1.16536	1.29288
A_23_P116840	16	ATG101	Homo sapiens autophagy related 101 (ATG101), transcript variant 1, mRNA [NM_021934]	CTGGGGCAGATGTCCTTGGAGTTCTACCAGAAGAAGAAGTCTCGCTGGCCATTCTCAGAC	60673	autophagy related 101	NM_021934	9.76146	9.78749	9.7354	9.48282	0.982119	1.19134
A_23_P116890	16	PRB3	Homo sapiens proline-rich protein BstNI subfamily 3 (PRB3), mRNA [NM_006249]	CAAGGTCCCCCACCTCGTCCAGGAAAGCCAGAAGGATCACCTTCACAAGGAGGCAACAAA	5544	proline-rich protein BstNI subfamily 3	NM_006249	10.0697	9.91744	8.15104	8.41305	1.11133	0.833926
A_23_P116942	13	LAG3	Homo sapiens lymphocyte-activation gene 3 (LAG3), mRNA [NM_002286]	AAGACAGTGGCGACCAAGACGATTTTCTGCCTTAGAGCAAGGGATTCACCCTCCGCAGGC	3902	lymphocyte-activation gene 3	NM_002286	4.61375	4.99185	5.34674	5.29522	0.769451	1.03635
A_23_P1170	16	ZFAND4	Homo sapiens zinc finger, AN1-type domain 4 (ZFAND4), transcript variant 1, mRNA [NM_174890]	GTGGAAACAACTTCTGTGCATCTCATCGTTATGCAGAAACTCATGGCTGTACCTATGATT	93550	zinc finger, AN1-type domain 4	NM_174890	9.84416	9.52288	7.23858	6.36385	1.24944	1.83367
A_23_P117037	16	LETMD1	Homo sapiens LETM1 domain containing 1 (LETMD1), transcript variant 1, mRNA [NM_015416]	CTTCACTGGCATGGGCTAACCACTTCTTTTTCAAACCCTCTGAACACCTTTTTCTGATGG	25875	LETM1 domain containing 1	NM_015416	12.7936	13.1145	11.6686	12.0907	0.800601	0.746346
A_23_P11705	16	BSDC1	Homo sapiens BSD domain containing 1 (BSDC1), transcript variant 2, mRNA [NM_018045]	TTTTTTGACGGGATGGGGTTTTTCTCTTTGTAATTATTTCTTTAGTTTAATTAACCTTTT	55108	BSD domain containing 1	NM_018045	11.1063	11.3192	12.004	12.6066	0.862798	0.658581
A_23_P117068	16	SNRPF	Homo sapiens small nuclear ribonucleoprotein polypeptide F (SNRPF), mRNA [NM_003095]	AGCTTGCAAATACAGAAGAATACATAGATGGAGCTTTGTCTGGACATCTGGGTGAAGTTT	6636	small nuclear ribonucleoprotein polypeptide F	NM_003095	13.4534	13.2674	13.1865	13.0832	1.13766	1.07424
A_23_P117082	4	HEBP1	Homo sapiens heme binding protein 1 (HEBP1), mRNA [NM_015987]	AAGGGGGAAAATGTGATTTGTGCCTGATCTTTCATCTGTGATTCTTATAAGAGCTTTGTC	50865	heme binding protein 1	NM_015987	8.39125	7.99909	1.8947	1.8676	1.31236	1.01896
A_23_P117146	16	PRDM4	Homo sapiens PR domain containing 4 (PRDM4), mRNA [NM_012406]	AGATCTTTGTAGGTTTAGACATGGCTCCCTGTCTCCAGTAAACATCCAGCCATTCAGACA	11108	PR domain containing 4	NM_012406	8.28632	8.08842	8.23297	8.04989	1.14702	1.13531
A_23_P117157	16	SUCLA2	Homo sapiens succinate-CoA ligase, ADP-forming, beta subunit (SUCLA2), mRNA [NM_003850]	GTGTTCTGTGTTATTGTTCTTTTTCTTTTTAGTGTGTGGAGATTGTAATTGCCATCTAGG	8803	succinate-CoA ligase, ADP-forming, beta subunit	NM_003850	9.91848	9.31253	10.3363	9.8877	1.52198	1.36473
A_23_P117163	16	RCBTB1	Homo sapiens regulator of chromosome condensation (RCC1) and BTB (POZ) domain containing protein 1 (RCBTB1), mRNA [NM_018191]	AAGTGAAGGACCACTTCTCATATTAGATTACTAAGTCATTTGTATGAATATGTGTGGCAG	55213	regulator of chromosome condensation (RCC1) and BTB (POZ) domain containing protein 1	NM_018191	10.4109	10.4004	10.3086	10.755	1.00726	0.733891
A_23_P117225	16	ERCC5	Homo sapiens excision repair cross-complementation group 5 (ERCC5), mRNA [NM_000123]	ATTTTTGGGGGAGACCTGCCTCTCAGAATCATCTGATGGATCTTCAAGTGAAGATGCTGA	2073	excision repair cross-complementation group 5	NM_000123	12.0341	12.5561	10.4757	10.464	0.696396	1.00808
A_23_P117274	15	MIPEP	Homo sapiens mitochondrial intermediate peptidase (MIPEP), mRNA [NM_005932]	CTTTTCCATGAAATGGGACATGCCATGCATTCAATGCTAGGACGTACTCGTTACCAACAC	4285	mitochondrial intermediate peptidase	NM_005932	5.90032	5.30581	5.97481	5.72755	1.50996	1.18695
A_23_P11729	15	ZBTB7B	Homo sapiens zinc finger and BTB domain containing 7B (ZBTB7B), transcript variant 3, mRNA [NM_001252406]	TTCCAATTCCAAGCTAAGAAGGTATTGGGGCAGAGGCTCCCCAAATTGGGGTGATCCCCC	51043	zinc finger and BTB domain containing 7B	NM_001252406	5.4586	5.3233	5.74707	6.5925	1.09832	0.556546
A_23_P117298	7	F7	Homo sapiens coagulation factor VII (serum prothrombin conversion accelerator) (F7), transcript variant 1, mRNA [NM_000131]	TAGAGATATGCACACACAGATGCACACACAGATATACACATGGATGCACGCACATGCCAA	2155	coagulation factor VII (serum prothrombin conversion accelerator)	NM_000131	4.79966	4.37717	3.91908	4.71361	1.34024	0.576533
A_23_P117363	16	SERPINA6	Homo sapiens serpin peptidase inhibitor, clade A (alpha-1 antiproteinase, antitrypsin), member 6 (SERPINA6), mRNA [NM_001756]	TTGGAGAGCGGGAGGTTTCCCCCAATCTCCTCCAAGTTCTTCTCCCTCCAACCAGAGTTG	866	serpin peptidase inhibitor, clade A (alpha-1 antiproteinase, antitrypsin), member 6	NM_001756	7.33368	7.39722	7.60259	7.14045	0.95691	1.37758
A_23_P117380	16	FAM181A	Homo sapiens family with sequence similarity 181, member A (FAM181A), transcript variant 1, mRNA [NM_138344]	TGGGATGTTGCCCTTCCTTGCCTTGCAGTCACCCCAGAAGCCAGAGAGACGCATCTGTTT	90050	family with sequence similarity 181, member A	NM_138344	7.1163	6.53114	6.06964	6.10114	1.5002	0.978407
A_23_P117424	16	DCAF11	Homo sapiens DDB1 and CUL4 associated factor 11 (DCAF11), transcript variant 1, mRNA [NM_025230]	TTAATCATGTTTGAATGTTAGGGGTTGGATCCTAGAGTAGATGCCTGAGGCCACATCTGA	80344	DDB1 and CUL4 associated factor 11	NM_025230	8.63587	8.52847	9.23702	9.65995	1.07728	0.745907
A_23_P11744	16	WASH1	Homo sapiens WAS protein family homolog 1 (WASH1), mRNA [NM_182905]	ACTTGGGCCGTTGCTCTGACATGGACACAGCCAGGACAAGCTGCTCAGACCTACTTCCTT	100287171	WAS protein family homolog 1	NM_182905	12.5911	12.968	12.8863	13.3303	0.770107	0.73509
A_23_P117494	16	MTHFD1	Homo sapiens methylenetetrahydrofolate dehydrogenase (NADP+ dependent) 1, methenyltetrahydrofolate cyclohydrolase, formyltetrahydrofolate synthetase (MTHFD1), mRNA [NM_005956]	AAGCTACTTTGAAAGTCTGGCCAGTGTCTATTCAGGCCCACTGGGAGTTAGGAAGTATAA	4522	methylenetetrahydrofolate dehydrogenase (NADP+ dependent) 1, methenyltetrahydrofolate cyclohydrolase, formyltetrahydrofolate synthetase	NM_005956	11.0765	11.3425	11.9101	11.4848	0.831624	1.34285
A_23_P117506	16	DHRS7	Homo sapiens dehydrogenase/reductase (SDR family) member 7 (DHRS7), mRNA [NM_016029]	CTGGAGAAGTCACAAAGACTATAGGCAATAATGGAGACCAGTCCCACAAGATGACAACCA	51635	dehydrogenase/reductase (SDR family) member 7	NM_016029	10.9304	11.1192	10.4143	10.154	0.877316	1.19769
A_23_P117515	16	ARID4A	Homo sapiens AT rich interactive domain 4A (RBP1-like) (ARID4A), transcript variant 1, mRNA [NM_002892]	TTACAACCACAGAAAGCACTCAACTGGTTTGACATTGCTAAGTATATCCTGTATACTTTT	5926	AT rich interactive domain 4A (RBP1-like)	NM_002892	7.22106	7.15319	7.66756	7.5447	1.04817	1.08889
A_23_P117546	16	SOS2	Homo sapiens son of sevenless homolog 2 (Drosophila) (SOS2), mRNA [NM_006939]	GCAGACTATGACGTCTTTAGCTAATGAATTGCCTATTGTTATGGAAAACAGTTAATATGC	6655	son of sevenless homolog 2 (Drosophila)	NM_006939	9.64403	9.99755	9.52692	9.814	0.782673	0.819557
A_23_P117558	16	FKBP3	Homo sapiens FK506 binding protein 3, 25kDa (FKBP3), mRNA [NM_002013]	TGGGATGAAGCTCTCTTGACTATGAGTAAAGGAGAAAAGGCTCGACTGGAGATTGAACCA	2287	FK506 binding protein 3, 25kDa	NM_002013	11.9604	11.5424	12.9747	12.3801	1.33606	1.51004
A_23_P117580	16	ENTPD5	Homo sapiens ectonucleoside triphosphate diphosphohydrolase 5 (ENTPD5), mRNA [NM_001249]	ATGACCGAGCTGTTGACACAGACATGATTGATTATGAAAAGGGGGGTATTTTAAAAGTTG	957	ectonucleoside triphosphate diphosphohydrolase 5	NM_001249	5.69623	5.53662	5.51779	5.51808	1.11698	0.999801
A_23_P117582	16	JDP2	Homo sapiens Jun dimerization protein 2 (JDP2), transcript variant 1, mRNA [NM_130469]	GGGGTGCATTTCCATCCTTGTAAACCCTTCATAGTACTCAGTCCTGTATCGCTCAGTAAA	122953	Jun dimerization protein 2	NM_130469	7.2625	8.74567	8.20216	8.20393	0.357701	0.998772
A_23_P117599	16	AHSA1	Homo sapiens AHA1, activator of heat shock 90kDa protein ATPase homolog 1 (yeast) (AHSA1), mRNA [NM_012111]	ATTAGTGTGAGCCTTGCCAAAGATGAGCCTGACACAAATCTCGTGGCCTTAATGAAGGAA	10598	AHA1, activator of heat shock 90kDa protein ATPase homolog 1 (yeast)	NM_012111	11.3175	10.9448	10.872	10.698	1.29476	1.12822
A_23_P117602	13	GZMB	Homo sapiens granzyme B (granzyme 2, cytotoxic T-lymphocyte-associated serine esterase 1) (GZMB), mRNA [NM_004131]	AACCATGAAACGCTACTAACTACAGGAAGCAAACTAAGCCCCCGCTGTAATGAAACACCT	3002	granzyme B (granzyme 2, cytotoxic T-lymphocyte-associated serine esterase 1)	NM_004131	4.45415	4.19006	4.43122	4.66849	1.20088	0.848352
A_23_P117662	9	HDC	Homo sapiens histidine decarboxylase (HDC), mRNA [NM_002112]	CCGAGGGTAGACAGGCAGCTTCTGTGGTTCAGCTTGTGACATGATATATAACACAGAAAT	3067	histidine decarboxylase	NM_002112	3.05936	3.51151	4.36513	4.15747	0.730954	1.15481
A_23_P117683	16	HYPK	Homo sapiens huntingtin interacting protein K (HYPK), transcript variant 1, mRNA [NM_016400]	AGGCGCTTATTGCCCTAACCAACTGATGCGTGCTTTCTCAAATATACCTACTGGATTAAT	25764	huntingtin interacting protein K	NM_016400	13.8512	13.3943	12.83	12.6848	1.37258	1.10589
A_23_P117694	10	CORO2B	Homo sapiens coronin, actin binding protein, 2B (CORO2B), transcript variant 1, mRNA [NM_006091]	ATTAGCTAGGATCTACTAGATGCATTATACTCCATACCTGCTTTTCCCATGGCCGCCCTA	10391	coronin, actin binding protein, 2B	NM_006091	4.03742	4.84526	3.85168	4.53473	0.571237	0.622847
A_23_P117727	16	MTFMT	Homo sapiens mitochondrial methionyl-tRNA formyltransferase (MTFMT), mRNA [NM_139242]	TTAACAGTTCAGTCCTTGCTGATCCAAAATTAACGGGACAGGCTCTTATTCCAGGATCAG	123263	mitochondrial methionyl-tRNA formyltransferase	NM_139242	9.57339	9.37381	8.63773	8.61724	1.14836	1.01431
A_23_P117734	4	LYSMD4	Homo sapiens LysM, putative peptidoglycan-binding, domain containing 4 (LYSMD4), transcript variant 1, mRNA [NM_152449]	AATCTCTGCAATAGGAAATGTTTCGATCATGCAAGTGCTTTCCCAGCCAAATGTCTGTGC	145748	LysM, putative peptidoglycan-binding, domain containing 4	NM_152449	8.09476	7.92749	1.94146	2.94372	1.12292	0.499217
A_23_P11774	16	UTP11L	Homo sapiens UTP11-like, U3 small nucleolar ribonucleoprotein (yeast) (UTP11L), mRNA [NM_016037]	GAGTCGTCGAAAACGTTGACGTGTTATAGATAAGCCTTGTCATTCTGTATCAAAAATCTG	51118	UTP11-like, U3 small nucleolar ribonucleoprotein (yeast)	NM_016037	10.701	10.4817	11.2904	11.1413	1.16415	1.10892
A_23_P117778	16	UBL7	Homo sapiens ubiquitin-like 7 (UBL7), transcript variant 1, mRNA [NM_032907]	AGGCCTCAGCAGTGACCCTATTGCTCTTGGGGTTCTCCAGGACAAGGACCTCTTCTCTGT	84993	ubiquitin-like 7	NM_032907	8.15265	8.75305	8.6712	9.0972	0.659569	0.744321
A_23_P117797	16	CLN6	Homo sapiens ceroid-lipofuscinosis, neuronal 6, late infantile, variant (CLN6), mRNA [NM_017882]	CGTCAGCCTACTGTGGCTGTTGAGCAAAGCATTTCTCCTTTCTGGGCCTCATTTGCACTA	54982	ceroid-lipofuscinosis, neuronal 6, late infantile, variant	NM_017882	8.19577	7.21846	6.81717	6.84986	1.96879	0.977601
A_23_P117851	16	CPLX3	Homo sapiens complexin 3 (CPLX3), mRNA [NM_001030005]	TTCCTGTAGAACGCTCTCTGGATTCCATAGCTGGAATCTCCTCTCTTAGCTCAGTGAAAA	594855	complexin 3	NM_001030005	10.7541	10.3549	9.61218	8.86626	1.31879	1.67704
A_23_P117852	16	KIAA0101	Homo sapiens KIAA0101 (KIAA0101), transcript variant 1, mRNA [NM_014736]	TACTGCTGCCATTTTTATTGGTGTTTGATTATTGGAATGGTGCCATATTGTCACTCCTTC	9768	KIAA0101	NM_014736	11.4721	12.0844	11.5587	11.2116	0.654175	1.27202
A_23_P117896	2	TGM7	Homo sapiens transglutaminase 7 (TGM7), mRNA [NM_052955]	GCTGAGAGTCCATGTCACCCTCACCAACACCTTAATGGTGGCTCTGAGCAGCTGCACGAT	116179	transglutaminase 7	NM_052955	1.90696	5.47461	3.51131	1.91052	0.0843392	3.03309
A_23_P117928	16	BAHD1	Homo sapiens bromo adjacent homology domain containing 1 (BAHD1), transcript variant 1, mRNA [NM_014952]	AGGAGGTAGGGTCTTGGCTGCCCCGAACTTAAATGCTTTTGAAATCTCTTAGATGTGGAA	22893	bromo adjacent homology domain containing 1	NM_014952	10.1515	10.581	10.6027	11.0155	0.742527	0.751157
A_23_P117933	16	GCSH	Homo sapiens glycine cleavage system protein H (aminomethyl carrier) (GCSH), transcript variant 1, mRNA [NM_004483]	GTCAGATGAGGAACACCACTATCTTAATTTTGCGATACACTGCATTTGCTGGTGCTATTT	2653	glycine cleavage system protein H (aminomethyl carrier)	NM_004483	12.5303	11.7818	11.3175	10.6198	1.68006	1.62185
A_23_P117980	16	KATNB1	Homo sapiens katanin p80 (WD repeat containing) subunit B 1 (KATNB1), mRNA [NM_005886]	CCGTCCTGCCACAGATTGAGAAGCTTCTGCAGAGCAAGTATGAGAGCTACGTCCAGACGG	10300	katanin p80 (WD repeat containing) subunit B 1	NM_005886	7.10631	6.19135	7.23038	7.17693	1.88552	1.03774
A_23_P118	14	EXTL2	Homo sapiens exostosin-like glycosyltransferase 2 (EXTL2), transcript variant 1, mRNA [NM_001439]	GTTAAAACCCTTTGTATCAAAAGATCTTTATTGGTAGAGCACTGGTTATCTTCTGGATAC	2135	exostosin-like glycosyltransferase 2	NM_001439	5.36283	3.81505	6.08424	5.21516	2.92367	1.82651
A_23_P11800	13	CAMK2N1	Homo sapiens calcium/calmodulin-dependent protein kinase II inhibitor 1 (CAMK2N1), mRNA [NM_018584]	AAGCTTGTGTTTCTTTGTTGCTGCAAGCTATCTGCCCAAGTTAATGCAAATGGACACATT	55450	calcium/calmodulin-dependent protein kinase II inhibitor 1	NM_018584	1.9457	2.9593	8.63753	8.59768	0.495309	1.02801
A_23_P118002	16	UQCRC2	Homo sapiens ubiquinol-cytochrome c reductase core protein II (UQCRC2), mRNA [NM_003366]	TCATTTGTCTTTTTTCCAGTGAGGTAAAATAAGGCATAAATGCAGGTAATTATTCCCAGC	7385	ubiquinol-cytochrome c reductase core protein II	NM_003366	13.3457	13.5649	13.9052	14.1231	0.859049	0.859817
A_23_P118025	15	DPEP2	Homo sapiens dipeptidase 2 (DPEP2), mRNA [NM_022355]	CGACCTCTCACGTCTGCGTCAGAGACAGAGTCTGACTTCAGGCCAGGAACTCACTGAGAT	64174	dipeptidase 2	NM_022355	7.95977	8.97079	6.72389	6.26671	0.496195	1.37286
A_23_P118038	16	NUTF2	Homo sapiens nuclear transport factor 2 (NUTF2), mRNA [NM_005796]	ACGATGCTTGGGTTTGCACCAATGACATGTTCAGGCTCGCCCTGCACAACTTTGGCTGAC	10204	nuclear transport factor 2	NM_005796	10.6162	10.4264	10.2115	10.0901	1.14059	1.08777
A_23_P118042	5	LRRC36	Homo sapiens leucine rich repeat containing 36 (LRRC36), transcript variant 1, mRNA [NM_018296]	AGGCTCTCACCGCCATTGCCACCAGTATGGTGGTATGTACTCACAAAGATTAAGAAAGAA	55282	leucine rich repeat containing 36	NM_018296	4.02492	5.19506	1.70923	1.70267	0.444379	1.00456
A_23_P118061	16	CKLF	Homo sapiens chemokine-like factor (CKLF), transcript variant 4, mRNA [NM_181641]	GCACAAGCCCCTGAACCATATATTGTTATCACTGGATTTGAAGTCACCGTTATCTTATTT	51192	chemokine-like factor	NM_181641	9.50443	10.3125	10.8557	10.5698	0.571153	1.21914
A_23_P118095	16	RPL3L	Homo sapiens ribosomal protein L3-like (RPL3L), mRNA [NM_005061]	TTGCTGGTACCAAGAAGCGGGTCATTACGCTGAGAAAGTCCCTCCTGGTGCATCACAGTC	6123	ribosomal protein L3-like	NM_005061	6.83902	6.83675	5.89452	5.49003	1.00158	1.32362
A_23_P118105	16	NDUFB10	Homo sapiens NADH dehydrogenase (ubiquinone) 1 beta subcomplex, 10, 22kDa (NDUFB10), mRNA [NM_004548]	TCAGCAGAGGGAAGGACAGAACTACCAGCAGAACTGTATCAAGGAAGTGGAGCAGTTCAC	4716	NADH dehydrogenase (ubiquinone) 1 beta subcomplex, 10, 22kDa	NM_004548	13.8019	13.6358	13.8497	13.9303	1.12199	0.945643
A_23_P118150	16	ARL6IP1	Homo sapiens ADP-ribosylation factor-like 6 interacting protein 1 (ARL6IP1), mRNA [NM_015161]	TTCAGATTTTCAGCTGACATTAGCTATAGTATACAGTAGGTTAAGACTCATGTCTATGAC	23204	ADP-ribosylation factor-like 6 interacting protein 1	NM_015161	9.46713	10.1082	10.1344	9.9239	0.641238	1.15711
A_23_P118203	3	ZG16B	Homo sapiens zymogen granule protein 16B (ZG16B), mRNA [NM_145252]	CCACCAGTTAATCTCACATACTCAGCAAACTCACCCGTGGGTCGCTAGGGTGGGGTATGG	124220	zymogen granule protein 16B	NM_145252	7.63313	6.15275	3.4978	2.93426	2.79022	1.47789
A_23_P118234	1	CES5A	Homo sapiens carboxylesterase 5A (CES5A), transcript variant 2, mRNA [NM_145024]	TCCTTGCAAAACAAGCTGCTTTCGCTGATATTTTATGGACTTAGGAATGATCCTTACAGA	221223	carboxylesterase 5A	NM_145024	1.81395	1.80648	1.77836	1.8213	1.00519	0.97068
A_23_P118246	16	GINS2	Homo sapiens GINS complex subunit 2 (Psf2 homolog) (GINS2), mRNA [NM_016095]	TGTGTGATGGTGCAAGGAATGGATTCAGGATGTTGTTGGAGAAACAAGTTTGTGATTAGT	51659	GINS complex subunit 2 (Psf2 homolog)	NM_016095	10.6173	10.3203	11.3962	10.6299	1.22858	1.70082
A_23_P118254	1	FOXF1	Homo sapiens forkhead box F1 (FOXF1), mRNA [NM_001451]	GTAGGCTCCTCCGTTTATCAGTATTAATGGTGTAACTTTGTTGGCAATATTTGCCGTGTA	2294	forkhead box F1	NM_001451	1.66696	3.1449	3.17958	1.64617	0.359001	2.89469
A_23_P118289	16	BCL7C	Homo sapiens B-cell CLL/lymphoma 7C (BCL7C), transcript variant 2, mRNA [NM_004765]	ATCTTAATGATGAGAACAGCAACCAGAGTTTCCATTCGGAAGGTTCCCTGCAAAAGGGCA	9274	B-cell CLL/lymphoma 7C	NM_004765	7.6579	7.63398	7.66248	7.39921	1.01672	1.20019
A_23_P118300	16	FAHD1	Homo sapiens fumarylacetoacetate hydrolase domain containing 1 (FAHD1), transcript variant 2, mRNA [NM_031208]	CTCAACTCATAGAAGATGAACCCTTCAAGAAAACGTGAAGTAGAACGGGTGGGCCAGAAA	81889	fumarylacetoacetate hydrolase domain containing 1	NM_031208	7.24539	6.84242	8.59768	8.27488	1.32223	1.25076
A_23_P118306	16	DNAJA3	Homo sapiens DnaJ (Hsp40) homolog, subfamily A, member 3 (DNAJA3), transcript variant 1, mRNA [NM_005147]	TGGTTCTCCCACTTACACTGTTGACATCTATTTTCTGAAGTGTGTTTAAATTATTCAGTG	9093	DnaJ (Hsp40) homolog, subfamily A, member 3	NM_005147	11.8788	11.9523	12.1658	11.7716	0.950314	1.31418
A_23_P118353	16	SRP68	Homo sapiens signal recognition particle 68kDa (SRP68), transcript variant 1, mRNA [NM_014230]	CTCAAGACTCTGGTGTTCAAAGCTTACAGGTGTTTTTTCATTGCTCAGTCCTATGTGCTG	6730	signal recognition particle 68kDa	NM_014230	9.22719	9.22154	10.5488	10.6897	1.00392	0.906948
A_23_P118392	16	RASD1	Homo sapiens RAS, dexamethasone-induced 1 (RASD1), transcript variant 1, mRNA [NM_016084]	CTTACCCAGGTGTTTATACTGTGTGTGTGTGAGGTCTTTAAAGTTATTGCTTTATTTGGT	51655	RAS, dexamethasone-induced 1	NM_016084	7.20691	7.23592	6.62114	6.72163	0.980094	0.93272
A_23_P118406	16	C17orf62	Homo sapiens chromosome 17 open reading frame 62 (C17orf62), transcript variant 2, mRNA [NM_001033046]	AAACTAACCAAACAGGAAAAACTGGGAGATTTTCTGCAGAAATTGAGTTCCAGCCTCTCT	79415	chromosome 17 open reading frame 62	NM_001033046	10.2849	9.96317	9.80839	9.99989	1.24986	0.875695
A_23_P11841	5	ATP2B4	Homo sapiens ATPase, Ca++ transporting, plasma membrane 4 (ATP2B4), transcript variant 2, mRNA [NM_001684]	CACGCACTATGATGAAGAACATCTTGGGCCATGCATTCTATCAGCTCATTGTCATCTTTA	493	ATPase, Ca++ transporting, plasma membrane 4	NM_001684	1.98822	1.99064	3.60405	1.98001	0.998329	3.08237
A_23_P118427	16	MAP2K3	Homo sapiens mitogen-activated protein kinase kinase 3 (MAP2K3), transcript variant B, mRNA [NM_145109]	TATCCCGGCTTTGGTGCGGGGTACACAAGAGGGGATGAGTTGTGTGAATACCCCAAGACT	5606	mitogen-activated protein kinase kinase 3	NM_145109	8.44708	8.664	7.56983	7.34035	0.8604	1.17241
A_23_P11843	16	LRRN2	Homo sapiens leucine rich repeat neuronal 2 (LRRN2), transcript variant 2, mRNA [NM_201630]	CTTTGTGGAGAAATGTGTCACCTCCCCCAACCCGATTCACTCTTTTCTCCTGTTTTGTAA	10446	leucine rich repeat neuronal 2	NM_201630	7.68022	7.60259	7.26473	7.05877	1.05529	1.15345
A_23_P118435	16	SUMO2	Homo sapiens small ubiquitin-like modifier 2 (SUMO2), transcript variant 1, mRNA [NM_006937]	AGACGGGAGGTGTCTACTGAAAAGGGAACCTGCTTCTTTACTCCAGAACTCTGTTCTTTA	6613	small ubiquitin-like modifier 2	NM_006937	13.3644	13.4118	13.9112	14.0609	0.967721	0.901439
A_23_P118462	16	OVCA2	Homo sapiens ovarian tumor suppressor candidate 2 (OVCA2), mRNA [NM_080822]	ATTGACTTGTGAAAACGCAAACATGAATATGGTTGGAGAGCCCTGGATTAGGAGGGTGAC	124641	ovarian tumor suppressor candidate 2	NM_080822	13.3604	13.4783	12.0377	12.3282	0.921505	0.817621
A_23_P118516	16	TVP23B	Homo sapiens trans-golgi network vesicle protein 23 homolog B (S. cerevisiae) (TVP23B), mRNA [NM_016078]	TATTTCTGTAGATTGTTTTCAGGAGAAAGTTTTGCTTCTATGGTAAGAGTGAGCACTTTG	51030	trans-golgi network vesicle protein 23 homolog B (S. cerevisiae)	NM_016078	9.07612	9.47893	8.84794	9.4047	0.756385	0.679826
A_23_P11859	16	HSD17B7	Homo sapiens hydroxysteroid (17-beta) dehydrogenase 7 (HSD17B7), mRNA [NM_016371]	ACGCTGTTGATGCCGGCAATATTGCTACTTCGCTTTTTTGCAAATGCATTCACTTTGACA	51478	hydroxysteroid (17-beta) dehydrogenase 7	NM_016371	8.72051	8.83446	8.6325	8.77195	0.924053	0.90787
A_23_P118607	16	PTGES3L-AARSD1	Homo sapiens PTGES3L-AARSD1 readthrough (PTGES3L-AARSD1), transcript variant 2, mRNA [NM_025267]	TGCTGAAGTGGATGGAGAGAAGTCATGGAACTGAAAAAGCACTGACTGCTCTGCTTAAGT	100885850	PTGES3L-AARSD1 readthrough	NM_025267	9.00496	8.73412	8.93978	9.38676	1.20651	0.733577
A_23_P118615	1	ABCA8	Homo sapiens ATP-binding cassette, sub-family A (ABC1), member 8 (ABCA8), transcript variant 2, mRNA [NM_007168]	TGATGGTTTATAAGTTGCCAGTGGAAGATGTGCAACCTTTAGCCCAAGCTTTCTTCAAAT	10351	ATP-binding cassette, sub-family A (ABC1), member 8	NM_007168	1.69275	1.6968	1.67417	1.68456	0.997194	0.992822
A_23_P11862	16	C1orf112	Homo sapiens chromosome 1 open reading frame 112 (C1orf112), mRNA [NM_018186]	CATACATACTCTAGGGTGAAACTTATCACTAGGCAGAACTGGGTTTGATGCTTTGTCAAC	55732	chromosome 1 open reading frame 112	NM_018186	9.49375	9.63085	9.90278	9.14337	0.909345	1.69279
A_23_P118633	16	SPATA20	Homo sapiens spermatogenesis associated 20 (SPATA20), transcript variant 1, mRNA [NM_022827]	ACTGATCCCTGCGAATTACGAAAACTACTACATCCATGACTGCCCCAACCCCCTTGGGGT	64847	spermatogenesis associated 20	NM_022827	9.18251	9.58563	9.12127	8.99286	0.756224	1.09309
A_23_P118643	16	EIF4E	Homo sapiens eukaryotic translation initiation factor 4E (EIF4E), transcript variant 1, mRNA [NM_001968]	GGTGAAGGATCCAGGAATATGACACAAAGGTGGAATAAACATTAATTTTGTGCATTCTTT	1977	eukaryotic translation initiation factor 4E	NM_001968	11.3265	11.1977	11.9385	11.8966	1.09336	1.0295
A_23_P118690	16	ZNF207	Homo sapiens zinc finger protein 207 (ZNF207), transcript variant 2, mRNA [NM_001032293]	AGCAGGAACTTTTCCTGAAGTTGCAATTTATACTGTATGGCTTCTTTTTCATGTTTCATC	7756	zinc finger protein 207	NM_001032293	11.5123	11.6898	11.17	11.3293	0.884189	0.895457
A_23_P118693	9	FOXN1	Homo sapiens forkhead box N1 (FOXN1), mRNA [NM_003593]	ATCTTCATCCCAACAGCCCAGCAAGAAGGAGGAGACAGAGAGCTCCTCCCTGGGTTGTCT	8456	forkhead box N1	NM_003593	4.722	5.03122	4.35917	3.98093	0.807075	1.29976
A_23_P118722	12	ASGR1	Homo sapiens asialoglycoprotein receptor 1 (ASGR1), transcript variant 1, mRNA [NM_001671]	TGAGGAGCTTGAAACCCGTGGCGCTTTCTGCAGTTTGCAGGTTATCATTGTGAACTTTTT	432	asialoglycoprotein receptor 1	NM_001671	4.60618	5.31568	4.36713	2.7413	0.611532	3.0862
A_23_P118741	10	SLC16A13	Homo sapiens solute carrier family 16, member 13 (SLC16A13), mRNA [NM_201566]	AACTAATAGGGACTAGAAGGATTTACTGTGGCCTGGGACTGTTGCAGATGATAGAGAGCA	201232	solute carrier family 16, member 13	NM_201566	4.54041	4.96974	4.25003	3.556	0.742602	1.6178
A_23_P118749	16	DERL2	Homo sapiens derlin 2 (DERL2), mRNA [NM_016041]	GAAGGACTCGGTGATACCCACTGGGATCTTTTATCCTTTGTTGCAAAAGTGTGGACACTT	51009	derlin 2	NM_016041	10.431	10.5468	9.86504	10.0783	0.92289	0.862561
A_23_P118815	16	BIRC5	Homo sapiens baculoviral IAP repeat containing 5 (BIRC5), transcript variant 3, mRNA [NM_001012271]	CTGGAAACCTCTGGAGGTCATCTCGGCTGTTCCTGAGAAATAAAAAGCCTGTCATTTCAA	332	baculoviral IAP repeat containing 5	NM_001012271	12.5612	13.3378	14.13	13.182	0.583753	1.92924
A_23_P118834	16	TOP2A	Homo sapiens topoisomerase (DNA) II alpha 170kDa (TOP2A), mRNA [NM_001067]	TGTGAGGCGATTATTTTAAGTAATTATCTTACCAAGCCCAAGACTGGTTTTAAAGTTACC	7153	topoisomerase (DNA) II alpha 170kDa	NM_001067	9.77068	10.7506	10.8379	10.2507	0.507017	1.50238
A_23_P118888	16	PAFAH1B1	Homo sapiens platelet-activating factor acetylhydrolase 1b, regulatory subunit 1 (45kDa) (PAFAH1B1), mRNA [NM_000430]	TGGAGTTCTGTTCCATTCTGGGGGGAAGTTTATTTTGAGTTGTGCTGATGACAAGACCCT	5048	platelet-activating factor acetylhydrolase 1b, regulatory subunit 1 (45kDa)	NM_000430	12.1207	12.7916	11.9155	12.5682	0.628096	0.63606
A_23_P118894	11	PRR15L	Homo sapiens proline rich 15-like (PRR15L), mRNA [NM_024320]	ACAACGCTGGAAAGGCCGAGAACCTCTTTTATGCTCATGTCTTGCATTTATTGAGATGAC	79170	proline rich 15-like	NM_024320	1.8681	1.87356	8.8512	9.17666	0.996228	0.798044
A_23_P119040	12	GREB1L	Homo sapiens growth regulation by estrogen in breast cancer-like (GREB1L), mRNA [NM_001142966]	AGGAATCCAAAGTTGAAGAGCCCAGGAAACGGGAAACTGTATCCATAATGCTGACCAAAT	80000	growth regulation by estrogen in breast cancer-like	NM_001142966	1.65963	1.65576	5.38928	5.78909	1.00268	0.757958
A_23_P119042	12	NKG7	Homo sapiens natural killer cell granule protein 7 (NKG7), mRNA [NM_005601]	GTTTTGAGCGTTGTATTCCAAAGGCCTCATCTGGAGCCTCGGGAAAGTCTGGTCCCACAT	4818	natural killer cell granule protein 7	NM_005601	4.29617	4.26959	6.39383	5.63556	1.01859	1.69147
A_23_P119095	16	PPP1R13L	Homo sapiens protein phosphatase 1, regulatory subunit 13 like (PPP1R13L), transcript variant 2, mRNA [NM_006663]	AGTCACTGCTGACACCATCTCTCCCAGCAGTCTTGGGGTCTGGGTGGGAAACATTGGTCT	10848	protein phosphatase 1, regulatory subunit 13 like	NM_006663	8.05112	8.77639	10.7727	12.1027	0.604885	0.397769
A_23_P119102	16	VASP	Homo sapiens vasodilator-stimulated phosphoprotein (VASP), mRNA [NM_003370]	GGAGGGAATTTCACATTCCCTTGTTCTAGATTCACTTTAACGCTTAATGCCTTCAAAGTT	7408	vasodilator-stimulated phosphoprotein	NM_003370	11.664	11.5304	10.9775	10.6894	1.09701	1.2211
A_23_P119130	16	RPS19	Homo sapiens ribosomal protein S19 (RPS19), mRNA [NM_001022]	AGACGTGAACCAGCAGGAGTTCGTCAGAGCTCTGGCAGCCTTCCTCAAAAAGTCCGGGAA	6223	ribosomal protein S19	NM_001022	17.2188	17.2157	17.5398	17.615	1.00218	0.949249
A_23_P119141	16	KEAP1	Homo sapiens kelch-like ECH-associated protein 1 (KEAP1), transcript variant 1, mRNA [NM_203500]	TTTGTTTCTTGGGCAAAAATACAGTCCAATGGGGAGTATCATTGTTTTTGTACAAAAACC	9817	kelch-like ECH-associated protein 1	NM_203500	9.42917	9.2578	8.94525	8.66801	1.12613	1.21188
A_23_P119143	11	ICAM5	Homo sapiens intercellular adhesion molecule 5, telencephalin (ICAM5), mRNA [NM_003259]	GACGCCCCCCAGACTCACACGGGGGCTTATTTATTGCTTTATTTATTTACTTATTCATTT	7087	intercellular adhesion molecule 5, telencephalin	NM_003259	10.7407	9.87077	4.08069	2.6852	1.82759	2.63079
A_23_P11915	16	GDAP2	Homo sapiens ganglioside induced differentiation associated protein 2 (GDAP2), transcript variant 1, mRNA [NM_017686]	GGAGCTGATAATTGGCAAAAGACCACTTTTACCACTCAGGCTCTATTTGTGCCTTAGCTT	54834	ganglioside induced differentiation associated protein 2	NM_017686	5.78648	5.8518	7.41943	6.97492	0.955738	1.36084
A_23_P119196	10	KLF2	Homo sapiens Kruppel-like factor 2 (KLF2), mRNA [NM_016270]	GAGACAGGTGGGCATTTTTGGGCTACCTGGTTCGTTTTTATAAGATTTTGCTGGGTTGGT	10365	Kruppel-like factor 2	NM_016270	6.37958	4.87686	4.77463	2.97166	2.83378	3.48936
A_23_P119214	16	TIMM44	Homo sapiens translocase of inner mitochondrial membrane 44 homolog (yeast) (TIMM44), mRNA [NM_006351]	CGAGAACGACATCATCCCCAATGTCCTGGAGGCCATGATTTCTGGAGAGCTTGACATTCT	10469	translocase of inner mitochondrial membrane 44 homolog (yeast)	NM_006351	8.63375	8.81559	8.83743	9.54951	0.881579	0.610439
A_23_P119254	16	ASF1B	Homo sapiens anti-silencing function 1B histone chaperone (ASF1B), mRNA [NM_018154]	AGGAACCATGTTGCCTTTCCTGTCAATCACAGCCACCTTCCTGTTATCTCCTAAATGGAT	55723	anti-silencing function 1B histone chaperone	NM_018154	9.35911	9.98616	9.95154	8.8505	0.6475	2.14509
A_23_P119266	16	DNASE2	Homo sapiens deoxyribonuclease II, lysosomal (DNASE2), mRNA [NM_001375]	CTGCCCTCTAACTGCTCGGATATCTGGCAGGTTCTGAATGTGAACCAGATAGCTTTCCCT	1777	deoxyribonuclease II, lysosomal	NM_001375	5.09277	5.73329	6.22046	6.40536	0.641483	0.879711
A_23_P119295	16	ECSIT	Homo sapiens ECSIT signalling integrator (ECSIT), transcript variant 1, mRNA [NM_016581]	CTGAAGGCATGAGATGCCCTTTGAGTGTACAGCAAATCAATGTTTTCCTGCTTGGGGCTC	51295	ECSIT signalling integrator	NM_016581	11.3125	10.4788	11.5877	12.112	1.7822	0.695287
A_23_P119337	16	ATF5	Homo sapiens activating transcription factor 5 (ATF5), transcript variant 1, mRNA [NM_012068]	ACAGAGAAGCAGCTGGGAGCTTGGAAACCTGGTCTCTTGAATTTCAAACCTGGTTTCTTA	22809	activating transcription factor 5	NM_012068	9.69808	10.4109	9.77639	10.0847	0.610136	0.807603
A_23_P119353	14	RASIP1	Homo sapiens Ras interacting protein 1 (RASIP1), mRNA [NM_017805]	TAGTTCTTATCCCGCGTGGAATGTTGGGAGATTGAGTTTTCGGGAAGTAGCGGATGGGAC	54922	Ras interacting protein 1	NM_017805	2.18438	3.6404	6.75896	6.64327	0.364497	1.0835
A_23_P119362	16	EMP3	Homo sapiens epithelial membrane protein 3 (EMP3), mRNA [NM_001425]	TGTTCATGTTCCAGCTCTACACCATGCGACGAGGAGGTCTCTTCTATGCCACCGGCCTCT	2014	epithelial membrane protein 3	NM_001425	9.30516	10.6447	9.88473	9.68042	0.395146	1.15213
A_23_P119377	16	CYTH2	Homo sapiens cytohesin 2 (CYTH2), transcript variant 2, mRNA [NM_004228]	CTTGGTGGAGAATGAACTGCTGCAGAACACACCCGAGGAGATCGCCCGCTTCCTGTACAA	9266	cytohesin 2	NM_004228	5.77044	6.06082	6.6137	7.17753	0.817687	0.676503
A_23_P119418	16	URI1	Homo sapiens URI1, prefoldin-like chaperone (URI1), transcript variant 1, mRNA [NM_003796]	TCGCAAATCCATCCTGAAGTCTCGAAGTAGAGAGAATAGTGTGTGTAGCGACACTAGTGA	8725	URI1, prefoldin-like chaperone	NM_003796	9.84464	9.41346	9.75464	9.77692	1.34833	0.984678
A_23_P119448	16	PPP6R1	Homo sapiens protein phosphatase 6, regulatory subunit 1 (PPP6R1), mRNA [NM_014931]	AGAGAGAATGGAGAGAGAGAAACATATATTATATATTATATAGAGAGAGGGAGGAGAGCG	22870	protein phosphatase 6, regulatory subunit 1	NM_014931	7.32213	7.27365	7.48203	7.08759	1.03417	1.31444
A_23_P119464	16	RHPN2	Homo sapiens rhophilin, Rho GTPase binding protein 2 (RHPN2), mRNA [NM_033103]	AACTCAGACAGTTCTTGGTACTAATGTGAGGAAACAAACATGTTCAGGCCCCGAACATTT	85415	rhophilin, Rho GTPase binding protein 2	NM_033103	5.57803	4.70374	6.56261	5.46841	1.8331	2.13495
A_23_P119478	10	EBI3	Homo sapiens Epstein-Barr virus induced 3 (EBI3), mRNA [NM_005755]	TCTAGCTGAGAAATGGAGATGTACTACTCTCTCCTTTACCTTTACCTTTACCACAGTGCA	10148	Epstein-Barr virus induced 3	NM_005755	6.98548	6.8174	4.42524	4.85077	1.12356	0.744568
A_23_P119535	2	EFNA2	Homo sapiens ephrin-A2 (EFNA2), mRNA [NM_001405]	CGACCAACGAGACCCTGTACGAGGCTCCTGAGCCCATCTTCACCAGCAATAACTCGTGTA	1943	ephrin-A2	NM_001405	1.66608	2.65566	2.41295	3.9139	0.503622	0.353321
A_23_P119562	5	CFD	Homo sapiens complement factor D (adipsin) (CFD), mRNA [NM_001928]	GGCCTGAAGGTCAGGGTCACCCAAGCAACAAAGTCCCGAGCAATGAAGTCATCCACTCCT	1675	complement factor D (adipsin)	NM_001928	4.37717	3.42982	3.15512	2.47936	1.92833	1.59744
A_23_P119573	1	KCNN1	Homo sapiens potassium channel, calcium activated intermediate/small conductance subfamily N alpha, member 1 (KCNN1), mRNA [NM_002248]	AAACGCCGCTGCTAACGTTCTCAGGGAGACGTGGCTCATCTACAAACATACCAGGCTGGT	3780	potassium channel, calcium activated intermediate/small conductance subfamily N alpha, member 1	NM_002248	2.7425	1.95946	1.96291	3.63696	1.72076	0.313373
A_23_P119593	16	EPHX3	Homo sapiens epoxide hydrolase 3 (EPHX3), transcript variant 1, mRNA [NM_024794]	CTGTCCCTGCCTTCGACCTCCTGCCTGGGTCTTCAGCTCAGTGCTACTCTGAATACAATA	79852	epoxide hydrolase 3	NM_024794	10.1905	10.2962	10.1506	10.1909	0.929369	0.972399
A_23_P119611	1	FXYD7	Homo sapiens FXYD domain containing ion transport regulator 7 (FXYD7), mRNA [NM_022006]	CTCTGGCAACCATCTTGTTCCTGCTGGGTATCCTCATCGTCATCAGCAAGAAGGTGAAGT	53822	FXYD domain containing ion transport regulator 7	NM_022006	3.05654	1.94884	1.93024	1.94576	2.15502	0.989303
A_23_P119617	16	SUGP1	Homo sapiens SURP and G patch domain containing 1 (SUGP1), mRNA [NM_172231]	AGGGCCGTGAGCCTGACTACTCAGAGTACAAGGAGTTCAAGCTGACTGTGGAGAACATCG	57794	SURP and G patch domain containing 1	NM_172231	8.60101	8.59333	9.00496	9.12099	1.00534	0.922721
A_23_P119627	16	NDUFA13	Homo sapiens NADH dehydrogenase (ubiquinone) 1 alpha subcomplex, 13 (NDUFA13), mRNA [NM_015965]	GCCTACAAATCGAGGACTTCGAGGCTCGCATCGCGCTGTTGCCACTGTTACAGGCAGAAA	51079	NADH dehydrogenase (ubiquinone) 1 alpha subcomplex, 13	NM_015965	13.8479	13.7951	13.2056	13.4662	1.03728	0.834742
A_23_P119634	2	UPK1A	Homo sapiens uroplakin 1A (UPK1A), transcript variant 1, mRNA [NM_007000]	CATCGACAGCTACACGTGGGGTATCTCGTGGTTTGGGTTTGCCATCCTGATGTGGACGCT	11045	uroplakin 1A	NM_007000	2.12492	2.39578	1.96744	2.01043	0.828825	0.970643
A_23_P119698	16	CD320	Homo sapiens CD320 molecule (CD320), transcript variant 1, mRNA [NM_016579]	ATGAAGGAGTCCCTGCTGCTGTCAGAACAGAAGACCTCGCTGCCCTGAGGACAAGCACTT	51293	CD320 molecule	NM_016579	9.98495	9.95489	9.96076	9.87462	1.02106	1.06152
A_23_P119714	16	BABAM1	Homo sapiens BRISC and BRCA1 A complex member 1 (BABAM1), transcript variant 1, mRNA [NM_001033549]	CATCTGCACCTTCTTGTGCAAGGAAGTCCTTGGCCTAAAGCCTTGGTTCTCAAACTGGGT	29086	BRISC and BRCA1 A complex member 1	NM_001033549	11.1511	11.0303	11.2377	11.2138	1.08732	1.01671
A_23_P119763	10	ABCG5	Homo sapiens ATP-binding cassette, sub-family G (WHITE), member 5 (ABCG5), mRNA [NM_022436]	TCTTGGATCCAAGCAGGCCTTGAATGCAATGGAAGTGGTTTATAGTCCCTTGCTCTTACA	64240	ATP-binding cassette, sub-family G (WHITE), member 5	NM_022436	5.48821	5.5816	4.39716	3.70196	0.937317	1.61911
A_23_P119778	16	SLC39A10	Homo sapiens solute carrier family 39 (zinc transporter), member 10 (SLC39A10), transcript variant 2, mRNA [NM_020342]	TAGATTATTGCCAGTGTCTTTTCTGTATGCTATAAGCAAGGGAGCTTAGGTGTTATTTCT	57181	solute carrier family 39 (zinc transporter), member 10	NM_020342	7.7944	7.37782	7.29629	5.47461	1.33476	3.53494
A_23_P119789	14	TMEM185B	Homo sapiens transmembrane protein 185B (TMEM185B), mRNA [NM_024121]	ATGCTGAAGAAACATCAGTTCCAGAAGCTCCGAAAATTGCTCCAATATTTGGAAAGAAGG	79134	transmembrane protein 185B	NM_024121	5.74322	5.80062	4.26536	4.26203	0.960998	1.00231
A_23_P11980	1	CFAP57	Homo sapiens cilia and flagella associated protein 57 (CFAP57), transcript variant 5, mRNA [NM_001195831]	TTCGAGGTCTCTTTGAGAAGTACGTGCAGCGAGCAGACATGGTGGAGATCGCAGGGCTGA	149465	cilia and flagella associated protein 57	NM_001195831	1.79092	1.78883	1.78476	1.79805	1.00145	0.990828
A_23_P119835	16	NLRC4	Homo sapiens NLR family, CARD domain containing 4 (NLRC4), transcript variant 1, mRNA [NM_021209]	ATGGATGGCTTGCCTTCATGGGTGTATTTGAGAATCTTAAGCAATTAGTGTTTTTTGACT	58484	NLR family, CARD domain containing 4	NM_021209	9.5361	9.81639	7.29678	6.04907	0.823427	2.37464
A_23_P119857	16	TTC32	Homo sapiens tetratricopeptide repeat domain 32 (TTC32), mRNA [NM_001008237]	ACAGAGGGTTGATACTGTATAGGCTGGGATATTTTGATGATGCTTTGGAAGATTTCAAGA	130502	tetratricopeptide repeat domain 32	NM_001008237	9.93528	9.88526	11.8518	10.1093	1.03528	3.34618
A_23_P1199	16	NUDT5	Homo sapiens nudix (nucleoside diphosphate linked moiety X)-type motif 5 (NUDT5), mRNA [NM_014142]	TGTCAAACTGTACTATACACATCGTGACAGTCACCATTAACGGAGATGATGCCGAAAACG	11164	nudix (nucleoside diphosphate linked moiety X)-type motif 5	NM_014142	11.6618	11.6388	11.5455	11.2593	1.0161	1.21944
A_23_P119907	16	ANKZF1	Homo sapiens ankyrin repeat and zinc finger domain containing 1 (ANKZF1), transcript variant 1, mRNA [NM_018089]	GACAAATCAACACGTAATGAGTTCCGAAGGTTCATGGAGAAGAATCCAGATGCCTACGAT	55139	ankyrin repeat and zinc finger domain containing 1	NM_018089	9.78996	9.56686	8.88185	9.37701	1.16724	0.709486
A_23_P119916	11	WNT6	Homo sapiens wingless-type MMTV integration site family, member 6 (WNT6), mRNA [NM_006522]	TGGAAAAAAGCCAGTCTAAAGGCCTCTGGATACTGGGCTCCCCAGAACTGCTGGCCACAG	7475	wingless-type MMTV integration site family, member 6	NM_006522	9.93491	9.84745	4.21369	3.89586	1.0625	1.24645
A_23_P119923	16	CNNM4	Homo sapiens cyclin and CBS domain divalent metal cation transport mediator 4 (CNNM4), mRNA [NM_020184]	CGTTATGAGTTTGACTCTCGGGGAGTTTTGTTGTTATGACTCTTGTGTCTTTTGTCACAA	26504	cyclin and CBS domain divalent metal cation transport mediator 4	NM_020184	11.0359	10.816	10.6955	10.6952	1.16464	1.00025
A_23_P119943	16	IGFBP2	Homo sapiens insulin-like growth factor binding protein 2, 36kDa (IGFBP2), mRNA [NM_000597]	GGAGGGGGAAGAGAAATTTTTATTTTTGAACCCCTGTGTCCCTTTTGCATAAGATTAAAG	3485	insulin-like growth factor binding protein 2, 36kDa	NM_000597	6.59513	5.0171	5.61088	5.3499	2.98562	1.1983
A_23_P11995	16	PRDX1	Homo sapiens peroxiredoxin 1 (PRDX1), transcript variant 1, mRNA [NM_002574]	TCAGGATTATGGGGTCTTAAAGGCTGATGAAGGCATCTCGTTCAGGGGCCTTTTTATCAT	5052	peroxiredoxin 1	NM_002574	14.3252	14.0487	13.2952	12.9524	1.21128	1.26822
A_23_P119964	16	CEBPZ	Homo sapiens CCAAT/enhancer binding protein (C/EBP), zeta (CEBPZ), mRNA [NM_005760]	ATCTATTGGATGAAAATATGGGATCCAAGTTTGATAACATTGGCATGAATGCCATGGCTA	10153	CCAAT/enhancer binding protein (C/EBP), zeta	NM_005760	10.7386	10.6024	12.232	11.2858	1.09902	1.92677
A_23_P120002	16	SP110	Homo sapiens SP110 nuclear body protein (SP110), transcript variant b, mRNA [NM_004510]	AAGGAACGCAAAGAACTGGAAACGGAATATACGTTGTGAAGGAATGACCCTAGGAGAGCT	3431	SP110 nuclear body protein	NM_004510	9.80667	10.5855	8.30912	8.96912	0.582823	0.63288
A_23_P120048	16	BAZ2B	Homo sapiens bromodomain adjacent to zinc finger domain, 2B (BAZ2B), transcript variant 1, mRNA [NM_013450]	TATTTTCGTCTGAAGGTAATGATAGCTATACAGTCTGTACAGTAATTATCCTCTACCAAC	29994	bromodomain adjacent to zinc finger domain, 2B	NM_013450	6.70603	5.42079	7.81854	8.12563	2.43722	0.808269
A_23_P120056	15	RTKN	Homo sapiens rhotekin (RTKN), transcript variant 2, mRNA [NM_033046]	CAAAGGCCAACCTCGCACTTGGCTCCAGTCACCAGTGTGAGAGAGAAAGGTGCTGGCATA	6242	rhotekin	NM_033046	5.72446	5.5229	6.53386	6.2088	1.14995	1.25272
A_23_P120062	16	GCFC2	Homo sapiens GC-rich sequence DNA-binding factor 2 (GCFC2), transcript variant 1, mRNA [NM_003203]	TCTGTGGTGTTCTAAGGAATTAAATGCACTGGAGCTTTAAGAGCTCAACGTGTTTCCCTT	6936	GC-rich sequence DNA-binding factor 2	NM_003203	10.7051	10.5274	10.1161	10.0877	1.13105	1.01993
A_23_P120103	1	KCNS3	Homo sapiens potassium voltage-gated channel, modifier subfamily S, member 3 (KCNS3), transcript variant 1, mRNA [NM_002252]	TGACTGAGACGACATGCATGTAAGATCCACAAAATGAGACAATGCATGTAAATCCATGCT	3790	potassium voltage-gated channel, modifier subfamily S, member 3	NM_002252	1.86901	1.87067	1.887	2.64324	0.998849	0.592037
A_23_P120125	16	COLEC11	Homo sapiens collectin sub-family member 11 (COLEC11), transcript variant 2, mRNA [NM_199235]	CAATGTCATTATGTAATTATTACCCAGAATTGCTCTTCCATAAAGCTTGTGCCTTTGTCC	78989	collectin sub-family member 11	NM_199235	6.96873	5.83897	6.22764	6.60288	2.18823	0.770975
A_23_P120146	16	TGFBRAP1	Homo sapiens transforming growth factor, beta receptor associated protein 1 (TGFBRAP1), transcript variant 1, mRNA [NM_004257]	AAATCCCTTTTGTGAGCCTGTGTTTGTTAGATACCCAAATGGTGGTCTTGTGCACACCCA	9392	transforming growth factor, beta receptor associated protein 1	NM_004257	9.76415	9.66778	9.97571	9.57339	1.06908	1.32163
A_23_P120153	16	RNF149	Homo sapiens ring finger protein 149 (RNF149), mRNA [NM_173647]	AGATGACTTTAGGATTTGCATTTTTCCCTTTATTGCCTCATTTCTTGTGACGCCTTGTTG	284996	ring finger protein 149	NM_173647	9.26369	10.1506	8.15607	8.93455	0.540788	0.58298
A_23_P120170	16	TIGD1	Homo sapiens tigger transposable element derived 1 (TIGD1), mRNA [NM_145702]	TGCTACAGAGAAATCTTTCATGAAAGGAAGAGTCAACTCATGCGAAAAGCTTCACCGATG	200765	tigger transposable element derived 1	NM_145702	7.95425	8.05236	7.24225	6.16603	0.934254	2.10851
A_23_P120194	16	ORMDL1	Homo sapiens ORMDL sphingolipid biosynthesis regulator 1 (ORMDL1), transcript variant 1, mRNA [NM_016467]	TGGGCAGGCCCAGCTTATAAGTTAAAGGGCATCACAGTGAGGGTGTAGTAGATAAATTCA	94101	ORMDL sphingolipid biosynthesis regulator 1	NM_016467	12.5493	12.5239	11.3666	11.2834	1.01775	1.05938
A_23_P120227	16	LBH	Homo sapiens limb bud and heart development (LBH), mRNA [NM_030915]	CTTGTAAACTGCGTAACAAATCTACTTTGTGTATGTGTCTGTTTATGGGGGTGGTTTATT	81606	limb bud and heart development	NM_030915	7.59479	7.858	8.52942	8.94187	0.833236	0.751345
A_23_P120237	16	STARD7	Homo sapiens StAR-related lipid transfer (START) domain containing 7 (STARD7), mRNA [NM_020151]	TAAACACTTCCTTGACCTTCTTGTTGCCTGTTCATTTTTGTGCCAAGGAAGTAGCTGCCC	56910	StAR-related lipid transfer (START) domain containing 7	NM_020151	13.5497	13.3707	12.8898	12.5612	1.13206	1.25582
A_23_P120254	16	DUSP22	Homo sapiens dual specificity phosphatase 22 (DUSP22), transcript variant 2, mRNA [NM_020185]	TTCTTTAGCAAGAGAAAATATTTTCCCCTTATCCCCACTGCTGTGGAGGTTTCTGTACCT	56940	dual specificity phosphatase 22	NM_020185	10.843	11.8158	8.34892	8.59592	0.509506	0.842643
A_23_P120270	16	MCFD2	Homo sapiens multiple coagulation factor deficiency 2 (MCFD2), transcript variant 1, mRNA [NM_139279]	AGTAGATGTTATTTGGCCATCTCCTGGTTATATACAAATGTGACCCGTGATAATGTGATT	90411	multiple coagulation factor deficiency 2	NM_139279	11.0001	10.7282	10.3279	10.7623	1.20735	0.739988
A_23_P120316	16	MTHFD2	Homo sapiens methylenetetrahydrofolate dehydrogenase (NADP+ dependent) 2, methenyltetrahydrofolate cyclohydrolase (MTHFD2), transcript variant 1, mRNA [NM_006636]	AGGATTATTCCTTGCTATTAGTACTCATTTTATGTATGTTACCCTTCAGTAAGTTCTCCC	10797	methylenetetrahydrofolate dehydrogenase (NADP+ dependent) 2, methenyltetrahydrofolate cyclohydrolase	NM_006636	12.8024	12.7592	12.3117	12.3288	1.03034	0.988262
A_23_P120335	16	MTX2	Homo sapiens metaxin 2 (MTX2), transcript variant 1, mRNA [NM_006554]	GACGCACTGGTATTTGGCCATCTATACACCATTCTTACCACACAATTGACAAATGATGAA	10651	metaxin 2	NM_006554	11.158	10.9268	12.5622	12.7124	1.17387	0.90111
[truncated: 18,489 more rows]
